# Supplementary material for: Neural circuit mechanisms for transforming learned olfactory valences into wind-oriented movement
Source: eLife. 2023 Sep 18;12:e85756. doi: 10.7554/eLife.85756 (PMC10588983; doi:10.7554/eLife.85756)
Supplement: Figure 1—figure supplement 1—source data 1. [file elife-85756-fig1-figsupp1-data1.xlsx]

## Sheet: Sheet1
genotype	w;w,20xUAS-CsChrimson-mVenus; +/Empty-split-GA4																																				w;w,20xUAS-CsChrimson-mVenus; MB109B/MB315C
Initial orientaion	down wind																		upwind																		down wind
Odor	CS-		CS+		NoLED		CS- Angular		CS+ Angular		NoLED Angular		CS- Forward		CS+ Forward		NoLED Forward		CS-		CS+		NoLED		CS- Angular		CS+ Angular		NoLED Angular		CS- Forward		CS+ Forward		NoLED Forward		CS-		CS+		NoLED		CS- Angular		CS+ Angular		NoLED Angular		CS- Forward
Data type	cos(upwind)						Angular speed (degree/second)						Forward walking speed (mm/s)						cos(upwind)						Angular speed (degree/second)						Forward walking speed (mm/s)						cos(upwind)						Angular speed (degree/second)						Forward walking speed (mm/s)
	Mean	Confidence Interval	Mean	Confidence Interval	Mean	Confidence Interval	Mean	Confidence Interval	Mean	Confidence Interval	Mean	Confidence Interval	Mean	Confidence Interval	Mean	Confidence Interval	Mean	Confidence Interval	Mean	Confidence Interval	Mean	Confidence Interval	Mean	Confidence Interval	Mean	Confidence Interval	Mean	Confidence Interval	Mean	Confidence Interval	Mean	Confidence Interval	Mean	Confidence Interval	Mean	Confidence Interval	Mean	Confidence Interval	Mean	Confidence Interval	Mean	Confidence Interval	Mean	Confidence Interval	Mean	Confidence Interval	Mean	Confidence Interval	Mean
0.03333	-0.8457	0.0261	-0.8542	0.0248	-0.835	0.0241	60.3942	20.5084	40.6454	15.8746	49.0672	15.3976	0.6327	0.2511	0.5668	0.2548	0.4198	0.1922	0.8077	0.031	0.8131	0.03	0.8054	0.0293	85.0216	30.0425	74.5684	20.7505	75.7153	24.0127	1.336	0.3988	1.1348	0.366	0.5407	0.2446	-0.8128	0.0244	-0.8262	0.0278	-0.8251	0.0465	62.6716	14.7941	64.0384	16.8767	44.4184	22.405	0.6021
0.06667	-0.8377	0.0288	-0.8511	0.0262	-0.8247	0.0261	44.3513	12.2184	42.1528	14.2692	55.726	17.9145	0.6466	0.2219	0.5486	0.246	0.3865	0.1553	0.8064	0.032	0.8026	0.0327	0.8138	0.0295	80.9101	26.0397	89.4374	31.3039	91.1946	35.3533	1.2275	0.368	1.0984	0.3579	0.4801	0.1923	-0.8059	0.0267	-0.8112	0.032	-0.8262	0.046	59.5567	13.7257	72.6646	18.5858	44.1787	22.4245	0.6174
0.1	-0.8287	0.0325	-0.8447	0.0282	-0.8188	0.0288	59.8702	20.6358	41.2011	15.854	55.5779	19.1276	0.6101	0.207	0.5507	0.2486	0.3905	0.1632	0.8045	0.0335	0.8019	0.0336	0.8087	0.0315	85.0156	26.3528	77.9786	23.5728	99.5337	34.124	1.2633	0.3752	1.0848	0.3579	0.4402	0.1734	-0.7979	0.0296	-0.7927	0.0384	-0.8258	0.0465	61.1042	14.9431	75.5646	19.6204	45.6641	24.5905	0.6819
0.13333	-0.822	0.0354	-0.8424	0.0288	-0.8065	0.0331	56.4846	18.2566	35.8096	12.0356	46.808	13.4536	0.5623	0.2141	0.5463	0.2483	0.3292	0.1505	0.7977	0.0388	0.7879	0.0385	0.8067	0.0325	87.8536	26.6386	88.621	34.1937	80.0646	23.1226	1.2437	0.3666	1.0816	0.3258	0.4067	0.1549	-0.7856	0.0338	-0.767	0.0476	-0.825	0.0465	59.6154	15.2395	96.796	23.2924	51.5751	28.628	0.6264
0.16667	-0.8156	0.0377	-0.8324	0.0314	-0.7966	0.0367	52.4844	16.8075	46.3799	19.5717	55.2046	21.9999	0.5614	0.2083	0.586	0.2594	0.3269	0.1574	0.7941	0.0419	0.7812	0.0411	0.8024	0.0342	90.978	34.5246	64.9897	19.0287	74.9461	20.1573	1.3721	0.4157	0.9503	0.317	0.3379	0.197	-0.7662	0.0399	-0.7389	0.0571	-0.8178	0.0484	69.8479	21.6217	106.556	23.5462	44.4081	21.9049	0.5854
0.2	-0.8064	0.0391	-0.8259	0.0334	-0.7835	0.0397	53.7071	17.019	41.4483	14.2012	49.2402	18.0555	0.6269	0.2237	0.6101	0.2551	0.3771	0.1451	0.7776	0.0461	0.7751	0.0368	0.7989	0.0358	88.2937	30.9813	105.07	48.0354	64.6846	17.7234	1.2513	0.4072	1.0843	0.3417	0.384	0.1752	-0.7502	0.0441	-0.709	0.0637	-0.8049	0.0511	60.5552	13.5534	108.668	22.8395	63.9735	39.6443	0.6128
0.23333	-0.7966	0.0416	-0.8188	0.0363	-0.7755	0.0414	46.9964	14.9573	34.243	10.9726	45.6347	13.317	0.6341	0.2108	0.6319	0.2691	0.3709	0.139	0.7616	0.0491	0.7615	0.0393	0.7898	0.0373	97.3477	30.2401	96.0132	41.374	70.7985	20.9391	1.1395	0.3725	1.023	0.3329	0.3883	0.1534	-0.7354	0.0478	-0.6752	0.07	-0.8021	0.0518	65.5613	19.0688	111.987	23.0604	42.9972	20.9446	0.6045
0.26667	-0.786	0.0446	-0.8147	0.0391	-0.7694	0.0438	48.2947	16.5455	34.5271	12.4321	42.61	11.749	0.6856	0.2297	0.6719	0.2744	0.3581	0.14	0.7517	0.0528	0.7443	0.0465	0.7847	0.0394	79.5185	20.9932	88.5552	31.7994	77.1846	22.4161	1.1243	0.3719	1.0497	0.3386	0.3507	0.1476	-0.7211	0.0504	-0.6389	0.0766	-0.8021	0.0507	60.1547	13.042	118.361	26.3534	64.4679	33.5297	0.6181
0.3	-0.7736	0.0482	-0.8099	0.0413	-0.7608	0.0461	56.3318	21.6768	29.709	10.3102	44.2252	12.9332	0.7324	0.2393	0.6251	0.2706	0.4042	0.1595	0.7408	0.0573	0.7262	0.0519	0.7747	0.041	90.5018	23.2861	90.7796	30.3149	76.5306	25.388	1.0236	0.3456	0.8358	0.3291	0.408	0.1736	-0.7119	0.0516	-0.6078	0.0806	-0.8002	0.0544	66.3826	13.919	117.65	30.3173	61.544	35.1397	0.6112
0.33333	-0.764	0.0507	-0.8025	0.0435	-0.7525	0.0479	52.6129	18.1592	33.5352	12.6688	39.9271	10.771	0.6234	0.2404	0.6347	0.2714	0.3462	0.1374	0.7261	0.0581	0.7218	0.0513	0.7694	0.0408	120.248	31.8052	64.0053	18.9472	64.2705	16.9195	0.9606	0.3181	0.8589	0.3241	0.4649	0.1703	-0.6974	0.0544	-0.5655	0.0857	-0.7934	0.0614	63.5949	14.0386	119.538	24.7149	57.1134	28.7898	0.6012
0.36667	-0.7622	0.0498	-0.7948	0.0465	-0.7441	0.0506	50.2615	17.6451	33.0924	12.4883	45.5627	11.7101	0.6895	0.2328	0.6379	0.261	0.3716	0.1508	0.7166	0.0597	0.7139	0.0536	0.7669	0.0405	107.489	31.9504	73.4539	19.4039	65.888	18.7595	0.9518	0.3086	0.9161	0.3304	0.4459	0.1488	-0.683	0.0571	-0.5224	0.0906	-0.7762	0.076	58.9047	11.3472	115.712	25.099	69.7529	42.7882	0.5911
0.4	-0.7562	0.0508	-0.7813	0.0516	-0.735	0.0538	44.0314	12.399	50.309	17.0002	43.1953	11.5412	0.7193	0.2467	0.6406	0.2619	0.3414	0.1423	0.6973	0.0687	0.7073	0.0587	0.7695	0.0409	121.024	49.2865	94.0702	26.4467	66.9361	24.9215	1.0037	0.288	1.0043	0.3438	0.459	0.1557	-0.6673	0.0595	-0.4804	0.0948	-0.7596	0.0864	56.3707	14.5631	112.064	25.3533	67.3804	31.5479	0.6045
0.43333	-0.7478	0.0527	-0.768	0.0575	-0.7283	0.056	46.9274	11.8168	48.3601	16.8177	38.1561	10.9683	0.6758	0.2259	0.5857	0.2531	0.3818	0.1537	0.6852	0.0722	0.7066	0.0596	0.7652	0.0427	95.7114	28.1524	82.7943	22.9537	69.8249	23.6788	1.0616	0.2973	1.0185	0.3399	0.4298	0.1584	-0.6531	0.061	-0.4484	0.0983	-0.7367	0.0975	58.4346	13.1785	94.9233	19.7162	73.0707	38.6325	0.5414
0.46667	-0.7396	0.0543	-0.7582	0.0619	-0.7207	0.0586	52.072	14.6843	48.2223	21.6514	42.64	11.1521	0.7072	0.2226	0.5981	0.251	0.3743	0.158	0.6739	0.0753	0.6977	0.065	0.7648	0.0449	80.9691	21.7335	85.6067	27.8931	67.6751	17.0151	1.0451	0.304	1.0035	0.321	0.4177	0.1528	-0.633	0.0659	-0.4197	0.1024	-0.7201	0.1029	70.8891	19.5352	108.812	34.4445	62.8995	34.3514	0.5963
0.5	-0.7312	0.0562	-0.7485	0.0666	-0.7126	0.061	51.4812	15.1318	53.5863	22.6972	41.9053	13.7969	0.6866	0.2265	0.6016	0.2534	0.3969	0.1625	0.6556	0.0795	0.6909	0.0685	0.7649	0.0461	90.2704	27.8034	78.1082	26.2208	63.1695	17.6485	0.9742	0.3094	1.0117	0.3121	0.4554	0.1749	-0.6252	0.0659	-0.3935	0.1048	-0.7018	0.1075	73.2718	30.917	83.5519	18.0154	61.7905	34.2628	0.4994
0.53333	-0.7272	0.0587	-0.7423	0.0696	-0.7051	0.0627	53.9114	16.6299	47.0258	18.7474	43.5187	14.5442	0.7422	0.2361	0.5234	0.2674	0.4013	0.1581	0.6357	0.0844	0.6874	0.0686	0.7678	0.0475	94.3518	30.6523	74.1117	20.3306	57.3194	16.5479	1.1637	0.34	1.0323	0.3122	0.4227	0.1522	-0.6148	0.0672	-0.3686	0.1068	-0.6617	0.1237	57.5918	12.8587	75.6512	15.9206	87.4305	62.4285	0.5336
0.56667	-0.7261	0.0588	-0.7298	0.0727	-0.6962	0.0647	53.7799	17.9403	50.2725	19.5462	46.5069	13.4154	0.7058	0.2382	0.6036	0.2743	0.367	0.1488	0.6121	0.0927	0.6812	0.0696	0.7651	0.0489	105.424	42.8546	61.9986	16.4833	52.2154	14.9746	1.0977	0.3112	1.0185	0.3129	0.3966	0.1416	-0.5989	0.0695	-0.347	0.1082	-0.6378	0.1323	51.0207	11.0051	87.8664	21.4892	64.4232	38.9888	0.574
0.6	-0.7237	0.0593	-0.7205	0.0746	-0.6875	0.0668	60.2118	19.4069	40.6714	16.4679	47.3114	11.9909	0.6964	0.2621	0.6516	0.2664	0.3774	0.1542	0.592	0.0972	0.6782	0.0686	0.7688	0.0494	92.5993	26.5468	74.8354	21.3637	67.5184	19.1755	1.1316	0.3261	1.0106	0.314	0.3969	0.1406	-0.5878	0.0712	-0.322	0.1098	-0.6146	0.1421	53.4223	10.858	82.7936	20.8351	71.2566	37.6291	0.5635
0.63333	-0.7182	0.0607	-0.712	0.0767	-0.6784	0.0687	47.6284	12.5023	37.9425	15.1474	46.1198	12.6362	0.7587	0.2502	0.5741	0.2528	0.3949	0.1583	0.5743	0.1003	0.678	0.0671	0.7687	0.0502	91.81	28.0537	65.9988	17.7768	58.6503	15.6339	1.1322	0.3381	1.0164	0.3289	0.3012	0.1372	-0.5751	0.0728	-0.2966	0.1114	-0.5998	0.1472	53.3723	12.1108	91.2791	25.121	62.2504	31.5182	0.5769
0.66667	-0.7127	0.0624	-0.7017	0.0785	-0.6717	0.0702	49.5945	12.7824	44.9537	18.2984	43.0171	9.9013	0.7171	0.2413	0.558	0.2378	0.3872	0.1695	0.5621	0.1047	0.6799	0.0664	0.763	0.051	90.7239	30.5339	77.7511	20.2592	86.4525	37.0805	1.1499	0.337	1.033	0.3275	0.3298	0.1444	-0.5639	0.0745	-0.2737	0.1131	-0.5916	0.1498	53.9293	12.3939	90.5069	23.6797	46.1605	19.6216	0.5563
0.7	-0.7106	0.0631	-0.6936	0.0797	-0.668	0.0711	56.6029	16.8766	33.2398	11.1281	33.427	8.4697	0.7704	0.2541	0.5151	0.2306	0.3558	0.1671	0.569	0.1029	0.6928	0.0606	0.7663	0.0536	82.4657	23.2046	83.7659	29.0391	87.7069	27.6199	1.0817	0.304	1.0474	0.3246	0.4002	0.1805	-0.5515	0.0762	-0.2524	0.1143	-0.5789	0.1506	58.2031	11.6357	84.0374	26.4929	49.1344	23.9111	0.5679
0.73333	-0.7074	0.0638	-0.6849	0.0811	-0.6642	0.072	46.2485	12.343	36.016	12.2996	36.9613	9.5802	0.7642	0.2393	0.5663	0.2346	0.3587	0.1592	0.5731	0.1028	0.6923	0.0576	0.7629	0.0574	90.42	28.0616	81.0544	22.3822	83.4529	30.3985	1.1303	0.3291	1.0384	0.3259	0.5071	0.2302	-0.54	0.0779	-0.2441	0.1157	-0.5686	0.153	56.9845	12.0611	89.0607	24.528	46.1384	20.1386	0.5527
0.76667	-0.7026	0.0642	-0.6744	0.0828	-0.6596	0.0729	42.6587	11.7795	51.7299	18.2753	32.915	8.369	0.7108	0.2226	0.6037	0.238	0.344	0.16	0.5708	0.1025	0.6883	0.0574	0.7589	0.0592	81.7583	24.6951	85.2248	23.5117	68.3021	21.2761	1.1216	0.3202	1.072	0.3292	0.419	0.1499	-0.532	0.0788	-0.2407	0.1157	-0.5615	0.1545	52.19	10.4606	73.2895	19.1596	36.1608	14.9835	0.5216
0.8	-0.6931	0.0662	-0.6652	0.0848	-0.656	0.0731	50.7907	13.556	49.5967	18.4627	34.5366	9.0524	0.8062	0.2565	0.5771	0.2562	0.3401	0.1602	0.5685	0.1031	0.6858	0.0568	0.7533	0.059	82.3436	24.2054	75.0529	19.0471	104.467	45.5196	1.0905	0.3192	1.1027	0.3374	0.3761	0.1787	-0.5281	0.0791	-0.2326	0.1154	-0.5525	0.1563	64.7836	18.3312	69.5111	16.4011	43.7014	29.0737	0.5507
0.83333	-0.683	0.0682	-0.6514	0.0865	-0.6535	0.074	61.4804	15.8634	49.644	21.2287	45.2619	14.6556	0.7738	0.2497	0.5849	0.2397	0.3471	0.1595	0.5654	0.1017	0.6837	0.0576	0.7497	0.0539	86.8356	25.3937	65.6315	19.5947	106.622	45.0137	1.0523	0.3388	1.1223	0.3382	0.3668	0.1715	-0.5227	0.0793	-0.2316	0.1153	-0.5482	0.1577	58.433	12.021	63.9075	13.8905	39.6417	21.4899	0.5009
0.86667	-0.6721	0.0707	-0.6387	0.0883	-0.6518	0.0745	53.6736	14.3151	46.0256	15.3182	37.5803	10.4	0.7482	0.2301	0.6092	0.2387	0.3618	0.1556	0.5602	0.1036	0.6806	0.0599	0.7385	0.0569	94.1148	30.703	67.4047	18.7654	92.1163	35.594	0.9867	0.3127	1.1725	0.3276	0.4072	0.2046	-0.5184	0.0798	-0.2178	0.1142	-0.5385	0.1588	62.6212	12.9279	82.2857	29.9283	60.3555	34.823	0.5127
0.9	-0.6586	0.0736	-0.6275	0.0899	-0.6481	0.075	54.2431	13.7964	49.0509	18.8617	41.8675	11.1118	0.7474	0.2331	0.5928	0.2241	0.3752	0.1688	0.5613	0.1023	0.6795	0.0624	0.7265	0.0597	94.7857	32.473	73.9031	23.9497	67.1493	20.1463	0.9946	0.3055	1.1951	0.3147	0.4444	0.1615	-0.514	0.0801	-0.2176	0.1146	-0.5315	0.1605	59.1214	12.232	75.4361	31.8236	51.9751	31.6374	0.5132
0.93333	-0.6446	0.0767	-0.6141	0.0921	-0.6434	0.0756	54.8125	13.5675	58.4627	37.3518	38.9839	10.6367	0.736	0.2345	0.6072	0.2355	0.331	0.158	0.5599	0.1017	0.6865	0.0621	0.7078	0.0683	95.7506	28.391	79.7128	21.8583	91.21	37.7739	1.064	0.3522	1.1946	0.2936	0.4847	0.2325	-0.5095	0.0802	-0.2111	0.1142	-0.5197	0.1659	58.0307	11.7982	79.3972	21.0613	54.8354	39.4876	0.5113
0.96667	-0.6282	0.0799	-0.6012	0.0952	-0.6388	0.0764	56.3609	14.8159	38.848	12.9137	44.2865	12.0818	0.7054	0.2221	0.5693	0.2252	0.3042	0.1515	0.5516	0.1045	0.6836	0.0635	0.7015	0.0717	89.5783	29.4596	81.0054	21.2301	61.4256	17.8788	1.0238	0.3583	1.1027	0.2843	0.4419	0.1513	-0.5036	0.0803	-0.2002	0.1134	-0.5117	0.171	57.9339	11.2069	82.9726	24.6699	52.3595	38.7606	0.5685
1	-0.6121	0.0831	-0.5799	0.099	-0.6313	0.0785	56.1188	13.8216	52.3993	18.7109	49.4907	16.168	0.7428	0.2252	0.5723	0.2282	0.3208	0.1657	0.5532	0.104	0.6753	0.0662	0.692	0.0756	92.5846	36.8783	92.1705	26.8647	56.634	16.8858	1.0151	0.3679	1.1287	0.2837	0.3789	0.1285	-0.498	0.0809	-0.1839	0.1143	-0.5117	0.1723	65.2622	14.7701	89.74	38.2756	52.3089	33.0778	0.5843
1.03333	-0.5993	0.0855	-0.5611	0.1026	-0.6253	0.0798	54.6566	15.1836	58.7406	19.5212	41.8241	11.9376	0.7769	0.2304	0.5663	0.2206	0.3425	0.1571	0.5504	0.1041	0.6675	0.068	0.6849	0.0757	97.0985	31.312	90.5193	24.7305	71.564	26.6483	0.9165	0.3187	1.1476	0.2893	0.3721	0.14	-0.4907	0.0813	-0.1752	0.114	-0.5119	0.1716	59.7946	12.3892	85.0523	31.6031	60.0531	34.4574	0.634
1.06667	-0.5841	0.0876	-0.5494	0.105	-0.6186	0.0807	54.4831	14.8009	57.6036	19.8033	40.0258	11.3096	0.7305	0.2272	0.5182	0.2251	0.366	0.1896	0.5417	0.1066	0.6561	0.0714	0.6796	0.0766	106.839	45.8935	78.8482	24.5274	68.2953	19.6876	0.8452	0.3155	1.1328	0.2814	0.3554	0.1518	-0.4832	0.082	-0.1778	0.1136	-0.516	0.1675	56.4717	12.9354	78.7254	27.817	63.2512	34.9572	0.6111
1.1	-0.5781	0.0886	-0.5397	0.107	-0.6104	0.0823	49.6345	13.2215	45.9983	16.7523	49.3759	13.5337	0.7991	0.2483	0.6081	0.2361	0.3537	0.1621	0.5393	0.1039	0.6437	0.0767	0.6741	0.0778	106.289	25.8193	95.5903	27.6513	70.5299	24.236	0.9148	0.3112	1.1315	0.2751	0.3831	0.1374	-0.4741	0.0831	-0.1829	0.1148	-0.5187	0.1641	53.9716	12.7867	87.9655	32.868	45.6092	22.8568	0.6445
1.13333	-0.5713	0.0893	-0.5364	0.1078	-0.602	0.0836	44.8296	11.5566	47.5446	16.4269	47.778	13.0141	0.7602	0.2324	0.5824	0.2254	0.3313	0.1561	0.5378	0.1011	0.6419	0.079	0.67	0.0794	106.58	30.7782	94.4179	24.0721	63.8411	20.9763	0.9676	0.2996	0.9748	0.4499	0.4191	0.1664	-0.4635	0.0848	-0.1708	0.1157	-0.5148	0.1628	63.5862	14.1551	72.0132	25.3968	41.1725	20.5604	0.635
1.16667	-0.5643	0.0903	-0.5332	0.1089	-0.5943	0.0851	42.1515	10.5012	50.6256	14.8653	53.6853	14.4068	0.7509	0.23	0.5694	0.22	0.344	0.1571	0.5312	0.1001	0.6416	0.0809	0.6676	0.081	77.3537	28.8526	73.0207	17.1765	62.9134	20.0881	1.0828	0.3006	1.0681	0.2998	0.4142	0.1735	-0.453	0.0861	-0.1768	0.1166	-0.5074	0.162	63.0382	13.5878	77.1261	33.8984	43.9295	17.774	0.6628
1.2	-0.557	0.0911	-0.5327	0.1101	-0.5865	0.0863	46.8443	12.5069	58.4032	27.7596	50.7738	14.5708	0.782	0.2356	0.6537	0.2614	0.405	0.1876	0.5174	0.099	0.6426	0.0812	0.6685	0.0795	87.9493	34.8091	70.5514	18.7468	56.3465	17.914	1.1716	0.3253	1.1204	0.2966	0.4086	0.2044	-0.442	0.088	-0.182	0.1154	-0.4992	0.163	66.7412	13.8279	76.3947	31.0568	51.2811	22.1227	0.6303
1.23333	-0.5525	0.0915	-0.5321	0.1101	-0.5762	0.0882	46.6132	13.4791	53.2622	14.949	49.6977	12.9432	0.7282	0.2225	0.6527	0.2768	0.3969	0.1699	0.502	0.1014	0.6421	0.0822	0.6696	0.0766	78.5124	26.5644	79.9695	20.7116	64.2671	24.1526	1.0478	0.3411	1.1455	0.2975	0.4314	0.1739	-0.4244	0.0908	-0.1801	0.1155	-0.4936	0.1646	77.9583	28.3362	56.1112	12.4192	52.1159	24.2788	0.5964
1.26667	-0.5447	0.0929	-0.5292	0.1102	-0.567	0.0897	49.6098	13.901	54.0864	16.2582	55.016	17.8841	0.6926	0.2201	0.5888	0.2297	0.3771	0.1703	0.4988	0.1037	0.646	0.0815	0.6782	0.0758	65.7133	16.8893	70.6771	19.655	71.0564	23.9242	0.9273	0.3588	1.0927	0.2882	0.4327	0.1843	-0.4185	0.0916	-0.1689	0.1165	-0.4851	0.1664	71.9315	30.8427	61.0463	29.5103	54.8958	26.0339	0.4881
1.3	-0.5399	0.094	-0.5246	0.1106	-0.558	0.0911	50.882	13.9619	51.7712	16.3507	51.6506	14.627	0.717	0.2256	0.5956	0.2271	0.3942	0.175	0.5008	0.1031	0.6491	0.0807	0.6837	0.0743	70.3075	21.1931	78.6076	22.3428	54.9897	15.4227	1.0001	0.3273	1.0255	0.2882	0.4407	0.1717	-0.4128	0.0923	-0.1726	0.1164	-0.4734	0.1694	49.1095	11.0273	53.3515	17.0412	55.177	27.9519	0.6317
1.33333	-0.5322	0.0949	-0.52	0.1108	-0.5486	0.0932	49.2798	13.1935	54.266	16.4043	53.6929	14.5369	0.7088	0.2279	0.6279	0.2438	0.4034	0.1731	0.5025	0.1038	0.6425	0.0832	0.6839	0.0734	69.5732	16.9509	73.9834	24.2385	56.9989	16.4851	1.0437	0.3534	1.0726	0.2872	0.3841	0.161	-0.4104	0.0928	-0.1772	0.1163	-0.461	0.173	59.9894	17.0692	55.094	16.2156	52.8786	28.7716	0.6329
1.36667	-0.5224	0.0962	-0.515	0.1114	-0.542	0.0946	49.2997	12.9351	53.8928	17.306	42.2704	11.3645	0.6901	0.2285	0.607	0.2414	0.3919	0.1671	0.5005	0.1033	0.6365	0.0855	0.6839	0.0736	90.7789	37.5464	81.5275	22.0809	62.4084	25.2174	1.1506	0.3969	1.3635	0.5218	0.4781	0.2495	-0.4061	0.0932	-0.1739	0.1164	-0.4525	0.1753	56.2877	11.5997	57.7566	15.1951	48.9574	27.5322	0.6327
1.4	-0.5176	0.0974	-0.5108	0.1112	-0.5395	0.0948	54.3841	14.5371	50.0917	15.9836	38.5527	9.6672	0.6814	0.2274	0.5923	0.2347	0.4539	0.1797	0.493	0.1066	0.6386	0.0841	0.679	0.0739	89.2034	33.0267	75.7157	20.2882	81.7101	37.8824	1.1298	0.3433	1.2902	0.5182	0.423	0.2034	-0.4062	0.0931	-0.1727	0.1178	-0.4507	0.1748	54.3728	12.5898	71.7682	30.2824	53.8437	31.3876	0.5993
1.43333	-0.5141	0.0977	-0.5074	0.1116	-0.5328	0.0961	43.5242	10.699	56.7643	16.0915	46.3473	12.0238	0.7238	0.2334	0.6208	0.2458	0.4678	0.1819	0.4928	0.1071	0.6374	0.0829	0.6764	0.0749	72.743	24.8681	75.6616	19.3303	74.6518	27.3698	1.0214	0.3515	1.0478	0.2794	0.3399	0.162	-0.4025	0.0934	-0.1752	0.1185	-0.4542	0.1722	55.4937	13.7089	71.8601	23.1653	43.2483	22.8104	0.5794
1.46667	-0.509	0.098	-0.5048	0.1114	-0.5271	0.0968	48.2353	12.2183	52.38	17.7207	50.1747	11.73	0.7162	0.2252	0.6918	0.2678	0.4432	0.172	0.5104	0.1039	0.6503	0.0776	0.671	0.0749	94.6941	28.8838	103.645	48.341	61.6887	16.4247	0.9908	0.3424	1.1064	0.3088	0.3615	0.1825	-0.3988	0.0939	-0.1751	0.1179	-0.4608	0.1672	53.3527	10.9999	70.4595	20.8057	50.7816	27.3345	0.6132
1.5	-0.5042	0.0986	-0.5023	0.1116	-0.5249	0.0968	49.4526	13.1777	53.6053	15.3392	46.7706	11.219	0.7072	0.2194	0.6646	0.2505	0.4072	0.1669	0.5179	0.1026	0.6509	0.0776	0.6666	0.0746	79.6556	21.1966	86.3015	29.0678	56.7731	14.609	0.8603	0.3138	1.002	0.2758	0.3931	0.1851	-0.3999	0.0944	-0.1731	0.1181	-0.4678	0.1621	54.0312	16.0051	60.7158	14.4351	49.3255	32.1747	0.5625
1.53333	-0.4969	0.0997	-0.5002	0.112	-0.5231	0.0964	52.3286	14.7029	53.2474	15.557	51.141	11.6291	0.6742	0.2278	0.587	0.2276	0.4007	0.1647	0.5176	0.102	0.6445	0.0778	0.665	0.0753	83.8173	27.7184	84.676	24.2771	60.1979	17.5973	0.9454	0.3119	1.0447	0.2781	0.4712	0.1715	-0.3969	0.0945	-0.1727	0.1173	-0.4785	0.1582	51.8092	11.1992	69.6994	18.2832	49.6838	33.2682	0.5619
1.56667	-0.4895	0.1007	-0.4961	0.1129	-0.5176	0.0968	47.7145	12.4708	49.8504	16.7354	48.15	12.0906	0.648	0.2204	0.5567	0.2095	0.3963	0.1618	0.5208	0.101	0.64	0.0764	0.6662	0.0742	92.6667	26.6778	98.7992	27.8425	64.5089	16.7924	0.7447	0.3403	1.0654	0.285	0.5004	0.1813	-0.3951	0.0948	-0.1743	0.1178	-0.4892	0.1549	54.5453	13.759	62.8987	16.7076	58.2618	40.9762	0.5777
1.6	-0.4805	0.1015	-0.4968	0.1121	-0.5108	0.0973	50.2214	12.854	55.0499	16.8879	43.1307	11.3857	0.7088	0.2329	0.5499	0.2081	0.4056	0.1678	0.5023	0.1064	0.6346	0.0737	0.6624	0.0777	118.922	52.6396	95.5754	29.701	81.3273	24.8368	1.0232	0.3241	1.1235	0.3033	0.486	0.193	-0.3879	0.0958	-0.1753	0.1181	-0.4976	0.1543	52.0982	12.8284	56.3114	12.7419	53.4607	37.2077	0.5848
1.63333	-0.4727	0.1025	-0.4999	0.1111	-0.4986	0.0976	45.4929	11.265	53.6009	18.5083	60.8482	32.15	0.7063	0.2334	0.5367	0.2075	0.4301	0.1684	0.5085	0.1034	0.6247	0.075	0.6613	0.0776	105.005	30.2957	74.5464	23.1732	74.7136	30.4954	1.0509	0.2955	1.0376	0.2953	0.3482	0.1982	-0.3855	0.0958	-0.1739	0.118	-0.5022	0.1534	52.8454	11.3577	55.9078	12.1905	43.6786	35.5314	0.5962
1.66667	-0.4663	0.103	-0.5004	0.1106	-0.4897	0.0984	47.6737	12.4905	56.6674	20.1997	45.6026	11.7311	0.6621	0.2161	0.5756	0.227	0.4372	0.1694	0.5045	0.104	0.6166	0.0771	0.6643	0.0788	76.0287	19.1467	87.8576	25.9741	72.1384	19.05	1.0118	0.2965	1.044	0.3143	0.3775	0.1721	-0.3865	0.0955	-0.1709	0.1182	-0.502	0.153	60.8785	15.8992	57.3928	14.0396	45.2613	40.3434	0.5979
1.7	-0.4584	0.1032	-0.5023	0.1098	-0.4832	0.0987	43.7711	12.3736	52.2009	20.2189	41.6377	10.1541	0.7308	0.2415	0.591	0.2344	0.4389	0.1672	0.5184	0.1007	0.5985	0.0788	0.6624	0.0817	84.0921	26.8892	77.6278	21.5427	75.8929	24.1438	1.0278	0.3128	0.9064	0.2591	0.3838	0.1398	-0.3823	0.0952	-0.1647	0.1182	-0.4953	0.153	63.8057	17.2569	63.8834	17.6274	44.7421	37.1162	0.6408
1.73333	-0.4535	0.1032	-0.4984	0.1103	-0.4739	0.0991	43.4104	11.7251	58.6718	17.7334	53.9189	13.6819	0.6882	0.2367	0.6633	0.2555	0.4196	0.1508	0.5135	0.1047	0.5869	0.0808	0.6652	0.0835	93.359	28.2181	73.8742	21.4626	63.4016	20.8832	1.0501	0.3227	0.9126	0.2658	0.3898	0.1485	-0.374	0.096	-0.163	0.1175	-0.4843	0.1562	52.3086	11.2201	64.2818	15.8915	44.1193	35.79	0.5742
1.76667	-0.4489	0.1032	-0.4875	0.111	-0.466	0.1002	45.0313	12.2277	61.0286	21.2052	53.7173	15.138	0.7281	0.2396	0.5968	0.2539	0.3958	0.1439	0.5165	0.1045	0.5838	0.0817	0.6625	0.0845	77.7549	19.8572	91.8575	30.9559	52.9503	13.7196	1.1596	0.3729	0.9424	0.3083	0.3266	0.1422	-0.3656	0.0973	-0.1518	0.1174	-0.4741	0.1607	49.763	10.4695	60.2395	14.4153	42.4427	37.4513	0.6146
1.8	-0.4426	0.1037	-0.4801	0.1102	-0.4587	0.1006	55.9601	13.6672	69.7704	32.8786	53.1816	14.2789	0.7218	0.2709	0.6576	0.2399	0.3971	0.145	0.5238	0.1026	0.584	0.0803	0.6602	0.0854	71.1025	17.9294	87.6223	24.7276	63.775	17.2368	1.0689	0.3234	0.893	0.2827	0.3215	0.1343	-0.3539	0.0987	-0.1445	0.1164	-0.4632	0.1666	60.934	11.8809	59.9319	15.9411	53.0357	40.7748	0.6207
1.83333	-0.4343	0.1045	-0.4657	0.1105	-0.4525	0.1013	62.9368	18.6837	53.5713	16.5728	53.8905	14.2035	0.7502	0.3141	0.7037	0.2484	0.3847	0.1444	0.5331	0.1017	0.5866	0.0794	0.6537	0.0873	87.1404	23.586	87.6335	30.7893	77.5021	29.0785	1.0665	0.3109	0.9701	0.2918	0.296	0.1346	-0.344	0.0994	-0.1324	0.1163	-0.4599	0.1688	50.6112	10.4598	58.6945	14.2594	51.0368	36.706	0.5903
1.86667	-0.427	0.1052	-0.4546	0.1113	-0.446	0.1021	56.4692	13.6536	53.569	16.0095	46.6704	11.8822	0.7064	0.2437	0.6524	0.2331	0.3796	0.1407	0.5342	0.1016	0.5857	0.0773	0.6464	0.0889	93.3722	25.0488	95.2776	31.9915	76.3673	23.1419	0.9485	0.2852	0.9808	0.2887	0.324	0.1229	-0.3371	0.1003	-0.1235	0.1166	-0.4647	0.1672	47.1337	11.1874	50.988	12.5411	63.0679	42.3081	0.5899
1.9	-0.4181	0.1061	-0.4363	0.1135	-0.4391	0.1027	56.2411	14.5242	65.3533	30.5549	44.3466	11.3286	0.6449	0.2323	0.689	0.2448	0.3925	0.1487	0.5413	0.0998	0.576	0.0795	0.6378	0.0902	88.9919	21.8023	107.869	56.927	67.0638	17.0986	1.0221	0.3096	0.9619	0.3021	0.3223	0.1194	-0.3338	0.1004	-0.1182	0.1164	-0.4703	0.1663	50.9074	10.0792	63.0305	19.8279	61.8573	32.5226	0.6201
1.93333	-0.3992	0.1072	-0.4289	0.114	-0.4375	0.1019	70.0122	33.8081	53.1959	13.7722	45.1231	13.4427	0.6812	0.2244	0.6994	0.2546	0.3853	0.1453	0.5311	0.1007	0.5714	0.0808	0.6455	0.0888	108.995	41.7903	78.1125	19.9121	74.1	26.8083	0.9072	0.3106	0.9357	0.2934	0.3382	0.1189	-0.33	0.101	-0.1067	0.1169	-0.4713	0.1659	61.917	15.5395	59.0525	16.194	49.0852	24.7741	0.603
1.96667	-0.3923	0.1085	-0.4232	0.1144	-0.4363	0.1017	59.2345	18.3044	55.2892	16.0623	40.4126	11.0629	0.6705	0.2268	0.7695	0.2717	0.3935	0.1561	0.5237	0.1028	0.5707	0.0805	0.6453	0.0886	89.4023	23.5766	70.2178	16.7404	95.0642	43.6696	0.9659	0.3175	0.8652	0.2742	0.4458	0.2677	-0.3299	0.1009	-0.1053	0.1168	-0.4683	0.1666	52.8467	14.2549	66.15	19.7531	45.4131	19.6029	0.6341
2	-0.3848	0.1094	-0.411	0.1148	-0.4365	0.1013	49.716	12.5826	60.1159	19.3863	39.2253	10.3446	0.6552	0.2186	0.704	0.2497	0.3772	0.1507	0.5221	0.1016	0.5717	0.0803	0.639	0.0882	84.8366	20.9353	78.0905	20.9695	71.3268	24.7914	1.041	0.3026	0.8316	0.2567	0.3631	0.2102	-0.328	0.101	-0.097	0.1173	-0.467	0.1673	47.6877	11.0969	72.3505	20.7449	30.9364	14.1209	0.5821
2.03333	-0.3766	0.1096	-0.4065	0.1148	-0.4325	0.1015	57.5279	15.968	59.2097	16.1985	40.9821	9.6907	0.7162	0.2361	0.6684	0.2423	0.3904	0.1612	0.5314	0.0966	0.5797	0.0787	0.6418	0.0865	96.582	41.403	68.6649	16.7614	75.9357	22.4711	1.0789	0.297	0.8759	0.2807	0.2324	0.1177	-0.3258	0.1015	-0.0965	0.1179	-0.4631	0.1681	51.1152	10.5684	65.6023	16.3787	29.9754	13.9489	0.5622
2.06667	-0.3758	0.1099	-0.4007	0.1156	-0.4299	0.1015	59.5004	16.9735	61.1298	16.7136	40.4046	10.5051	0.7028	0.2317	0.6523	0.243	0.3564	0.1438	0.5236	0.0974	0.5787	0.0766	0.6385	0.0866	89.3931	24.5489	68.9058	19.6633	72.8855	22.1072	1.037	0.3146	0.7782	0.2744	0.2744	0.1462	-0.3246	0.1017	-0.0945	0.1187	-0.4597	0.1677	54.3985	13.5351	63.855	15.2323	20.259	11.5672	0.569
2.1	-0.3643	0.1104	-0.3974	0.1165	-0.4263	0.1015	60.2907	17.2181	57.4897	16.5881	49.742	11.6698	0.6943	0.2321	0.6674	0.2412	0.3489	0.1367	0.5227	0.0984	0.5821	0.0748	0.6368	0.086	66.7375	20.1865	81.3932	20.4468	66.9191	18.0594	1.166	0.3226	0.7978	0.2577	0.4217	0.3328	-0.3271	0.102	-0.0932	0.1191	-0.4547	0.1669	54.3343	13.7243	70.2324	20.9556	36.1057	18.3451	0.5552
2.13333	-0.3592	0.1112	-0.3971	0.1173	-0.4228	0.1017	49.6991	13.7235	62.8879	18.7899	50.9193	12.2385	0.6605	0.2202	0.6195	0.2293	0.3387	0.135	0.5194	0.0991	0.5823	0.075	0.6387	0.0832	75.2899	18.1684	75.5982	18.4744	101.799	54.6169	1.1072	0.3042	0.7549	0.256	0.32	0.1421	-0.3233	0.1029	-0.0838	0.1189	-0.4466	0.1661	53.0274	14.1894	70.0526	22.2939	35.0224	16.6055	0.5795
2.16667	-0.353	0.1119	-0.3909	0.1179	-0.4172	0.1021	47.1847	12.5309	58.2142	16.2698	55.5424	12.4367	0.6541	0.2202	0.6295	0.2224	0.3171	0.1338	0.5163	0.0993	0.5772	0.0749	0.6383	0.0829	81.1751	20.8237	80.9587	19.5183	68.651	20.7159	1.1409	0.3055	0.7415	0.2511	0.3411	0.1719	-0.3192	0.1041	-0.0854	0.1194	-0.4412	0.1658	62.0493	22.0748	75.0736	24.1953	36.1637	15.0027	0.5191
2.2	-0.3459	0.1129	-0.3837	0.1182	-0.4107	0.1025	52.8655	13.1183	64.6808	17.1759	44.7666	11.7838	0.6459	0.2196	0.6378	0.2137	0.3263	0.1408	0.5084	0.1008	0.5706	0.0746	0.6356	0.0822	92.8979	22.5066	82.1347	20.486	83.7721	31.0466	1.0831	0.2923	0.763	0.2573	0.4343	0.1799	-0.3097	0.1047	-0.0837	0.1196	-0.435	0.1664	67.2971	23.3728	63.6047	14.4258	29.3198	14.8559	0.544
2.23333	-0.3355	0.1141	-0.3766	0.1189	-0.4043	0.1029	55.0123	14.4624	62.9502	18.9706	38.9753	10.1319	0.6225	0.2124	0.6241	0.1988	0.3475	0.1435	0.5033	0.1025	0.561	0.0761	0.641	0.0806	92.5729	24.6509	85.9524	17.2495	68.0853	21.6125	1.0777	0.292	0.7943	0.254	0.4198	0.1708	-0.3025	0.1052	-0.0851	0.1202	-0.4292	0.1667	58.5789	15.6215	65.6905	14.6742	32.9804	15.275	0.632
2.26667	-0.329	0.1153	-0.373	0.1191	-0.3972	0.1031	58.7031	14.5742	75.417	26.5	41.2367	12.9522	0.6622	0.2137	0.6205	0.2067	0.3392	0.1288	0.4953	0.1029	0.5573	0.0774	0.65	0.0811	78.2107	20.9323	90.529	21.9787	81.9042	32.5555	1.0217	0.2706	0.7973	0.2538	0.3985	0.1704	-0.2999	0.1048	-0.0858	0.12	-0.4191	0.1685	63.6046	13.6736	70.701	22.0383	38.4272	19.4097	0.5428
2.3	-0.3213	0.1163	-0.3645	0.1198	-0.3893	0.1037	49.4203	12.1178	69.5901	22.7253	40.7005	10.7815	0.6451	0.2038	0.5551	0.1886	0.3556	0.1329	0.4927	0.1009	0.5488	0.0795	0.6515	0.0811	100.37	29.9853	83.1004	23.3293	55.9576	14.4242	1.0216	0.2834	0.8753	0.2683	0.3902	0.153	-0.2986	0.1045	-0.093	0.1211	-0.4103	0.1698	59.244	12.798	71.9887	29.109	35.7212	17.878	0.5633
2.33333	-0.3153	0.117	-0.3595	0.12	-0.3824	0.104	48.0659	12.7585	71.358	22.2436	43.0061	10.966	0.6871	0.2229	0.5791	0.2045	0.3443	0.1314	0.4878	0.0992	0.5389	0.0819	0.6525	0.082	93.6282	21.8908	77.7412	19.6508	55.4481	16.7634	1.0476	0.2932	0.8735	0.2647	0.4008	0.1493	-0.2987	0.1039	-0.0956	0.1216	-0.4065	0.1704	62.2967	12.7466	55.1588	13.7388	33.6106	15.4661	0.5587
2.36667	-0.308	0.1176	-0.3533	0.1203	-0.3784	0.1044	48.5242	12.5745	55.9746	17.1721	46.3818	11.2284	0.6341	0.207	0.5454	0.2046	0.327	0.1188	0.4872	0.0978	0.5363	0.0835	0.6569	0.0827	101.604	25.4238	89.6778	23.0553	54.3626	15.7257	1.1375	0.3097	0.8726	0.2758	0.4156	0.1518	-0.2962	0.1037	-0.095	0.1217	-0.404	0.1703	61.1592	11.9429	65.979	19.8816	52.3643	26.929	0.5448
2.4	-0.2997	0.1181	-0.353	0.1208	-0.3742	0.105	52.3586	12.8652	74.0765	32.8376	42.339	10.6741	0.6224	0.2076	0.5608	0.2213	0.2833	0.1167	0.4791	0.0995	0.5352	0.085	0.6572	0.084	97.4364	22.7243	101.511	22.6791	65.5266	20.1565	1.0742	0.2874	0.8694	0.2849	0.3977	0.1364	-0.2954	0.1036	-0.0957	0.1216	-0.4049	0.1694	64.8093	12.6081	63.7573	22.4652	52.0123	29.2807	0.5564
2.43333	-0.2932	0.1187	-0.3514	0.1199	-0.3697	0.1056	59.8402	18.7001	74.4472	23.9063	46.4671	11.4936	0.602	0.2137	0.5446	0.2232	0.2606	0.1229	0.484	0.0976	0.5257	0.0876	0.6607	0.0821	69.5593	18.0852	92.9458	35.1988	68.6882	19.5921	1.059	0.3182	0.9632	0.2712	0.3354	0.1343	-0.2941	0.103	-0.0902	0.1216	-0.4107	0.1673	57.9363	10.5525	61.8005	21.9707	48.3461	23.0738	0.5926
2.46667	-0.286	0.1185	-0.3548	0.1192	-0.3637	0.1063	68.6506	19.8056	60.9638	15.6846	47.9849	11.0672	0.6507	0.2251	0.6061	0.2265	0.2548	0.1251	0.474	0.0975	0.5297	0.0869	0.6639	0.0801	75.6792	23.9794	77.012	23.5273	63.057	21.2128	1.0939	0.324	1.1401	0.2995	0.2735	0.1979	-0.2914	0.1026	-0.0795	0.1223	-0.4189	0.1651	58.2419	11.2537	56.4952	14.5941	50.2921	23.0917	0.6135
2.5	-0.282	0.119	-0.3573	0.1189	-0.3588	0.1071	69.681	22.5378	51.2167	14.0599	49.314	12.0152	0.6538	0.2156	0.6578	0.2207	0.2964	0.1325	0.4756	0.0964	0.5345	0.0876	0.6572	0.0828	67.0017	20.3869	80.9076	23.2777	63.7495	21.6573	1.0845	0.3038	1.0014	0.2862	0.3459	0.1569	-0.2909	0.1025	-0.0692	0.1229	-0.4267	0.1625	53.1841	10.6439	59.057	15.9124	45.9449	24.1112	0.6384
2.53333	-0.2761	0.1193	-0.3592	0.1189	-0.3542	0.1076	63.9732	22.7826	47.6957	14.2388	44.5939	11.4133	0.5708	0.203	0.6202	0.2186	0.2964	0.1286	0.4843	0.0934	0.5361	0.0885	0.6548	0.0833	67.0401	24.3278	88.5545	21.9224	61.0362	19.2532	1.0592	0.3071	0.9183	0.2829	0.3132	0.1546	-0.2896	0.1025	-0.0606	0.1237	-0.4384	0.1608	48.9034	9.713	61.9961	17.6967	41.9002	21.5261	0.6415
2.56667	-0.2707	0.1196	-0.3649	0.1176	-0.3514	0.1078	51.6852	13.8514	49.6319	19.026	52.7491	14.2827	0.6854	0.2127	0.5821	0.2154	0.2769	0.1282	0.4845	0.0928	0.5334	0.0893	0.6521	0.0835	68.9257	19.9951	84.3369	20.3611	75.7206	27.8981	1.0535	0.2985	0.802	0.2801	0.378	0.1821	-0.2892	0.1027	-0.0501	0.1235	-0.4462	0.161	49.2987	10.0132	64.3465	15.1137	41.4051	20.2836	0.6225
2.6	-0.2717	0.119	-0.3656	0.1177	-0.3463	0.1086	58.9763	16.2364	60.7449	15.858	55.1313	15.4407	0.7074	0.213	0.7437	0.2836	0.2733	0.1168	0.4828	0.0931	0.53	0.0891	0.649	0.0835	82.2751	23.0374	68.5037	16.8931	68.6086	20.9987	1.1238	0.2938	0.8486	0.2692	0.3331	0.1562	-0.2935	0.1025	-0.0479	0.1236	-0.4525	0.162	47.3197	9.8618	69.1773	16.4584	33.8554	17.0282	0.5855
2.63333	-0.2765	0.1186	-0.3643	0.1175	-0.3385	0.1096	67.9406	21.5848	59.3443	16.125	49.4066	11.4882	0.6246	0.2082	0.6734	0.2189	0.2521	0.1194	0.4756	0.0933	0.5316	0.0887	0.6422	0.0854	90.9154	27.8526	68.7477	17.0549	70.1615	22.4251	1.0809	0.2817	0.8876	0.2653	0.3859	0.1709	-0.2963	0.102	-0.0441	0.1237	-0.4566	0.162	46.9762	10.8206	63.0266	14.585	44.5249	21.9202	0.6114
2.66667	-0.2769	0.1188	-0.3635	0.1173	-0.3346	0.1103	59.4647	13.9985	63.785	17.983	43.6831	9.9633	0.6615	0.2191	0.7336	0.2701	0.2922	0.1267	0.4595	0.0955	0.5341	0.0886	0.6378	0.0847	104.629	30.4938	70.7983	18.1131	47.702	12.8361	1.0957	0.2987	0.8637	0.2641	0.4165	0.1995	-0.2976	0.1016	-0.0415	0.1242	-0.4613	0.1615	39.574	8.8186	62.3659	12.8274	43.2903	21.5142	0.6326
2.7	-0.2807	0.1189	-0.3624	0.1171	-0.3306	0.111	65.6786	15.9304	66.7588	17.4668	48.3291	13.0056	0.6266	0.2039	0.6797	0.2337	0.2518	0.114	0.4516	0.0981	0.5271	0.0898	0.6377	0.0822	87.6792	22.1512	71.9648	17.6875	56.9452	19.8831	1.0944	0.2887	0.8561	0.2579	0.3853	0.1484	-0.2988	0.1011	-0.041	0.1243	-0.473	0.1611	36.4707	8.1195	54.8523	12.2166	50.6085	20.7471	0.6032
2.73333	-0.2798	0.1195	-0.3611	0.1165	-0.3268	0.1117	53.4531	17.3038	69.4413	19.8008	44.2227	12.3627	0.6088	0.1916	0.6773	0.236	0.2872	0.123	0.4554	0.0998	0.5208	0.0922	0.6324	0.0826	109.911	27.0845	80.0516	18.4436	51.621	14.556	1.0985	0.287	0.8837	0.279	0.422	0.1649	-0.3003	0.1007	-0.043	0.124	-0.482	0.1619	47.2936	10.1374	53.7659	12.5966	47.6315	20.5683	0.6032
2.76667	-0.2807	0.1195	-0.3603	0.1158	-0.3246	0.1119	52.5424	11.9172	73.8817	19.2204	36.1754	9.0206	0.6098	0.1914	0.699	0.2378	0.2819	0.1209	0.4513	0.1007	0.5139	0.0939	0.6322	0.0801	101.533	29.9629	88.0108	22.3049	61.9602	20.3732	1.103	0.2977	0.8155	0.2438	0.4181	0.1587	-0.301	0.1004	-0.0425	0.124	-0.4876	0.163	50.2172	11.1281	53.2474	14.2337	43.4464	19.6206	0.5791
2.8	-0.2836	0.1192	-0.3544	0.1158	-0.3193	0.1122	62.5625	19.0398	63.0058	16.4507	41.9737	10.8878	0.636	0.1934	0.7111	0.2327	0.2862	0.1184	0.4437	0.1019	0.5022	0.0959	0.6269	0.0804	77.8625	20.3215	89.8912	21.3306	63.1626	19.0814	1.0389	0.2901	0.8346	0.2474	0.3344	0.1375	-0.301	0.1003	-0.0422	0.1236	-0.4921	0.1643	54.9145	11.4325	54.4669	11.8185	38.1236	17.2262	0.5837
2.83333	-0.2854	0.119	-0.3461	0.116	-0.3134	0.1122	64.485	15.0118	58.7814	15.617	45.3404	13.1424	0.629	0.1833	0.7058	0.2251	0.281	0.113	0.443	0.1029	0.4934	0.0967	0.6192	0.0824	81.1054	22.6821	93.9752	24.766	60.1675	19.9164	0.957	0.2755	0.948	0.2763	0.3891	0.1507	-0.2998	0.1006	-0.0407	0.1233	-0.4914	0.1651	56.3508	12.3787	58.1971	12.4714	26.9186	14.4799	0.5737
2.86667	-0.2808	0.1192	-0.3422	0.1155	-0.3045	0.1127	66.5258	16.2325	62.3985	17.4357	49.3473	15.6163	0.6258	0.1793	0.718	0.2258	0.2736	0.1203	0.4382	0.1045	0.4867	0.0971	0.6184	0.0832	76.3883	18.5737	85.083	23.381	69.0541	20.8401	0.8798	0.2642	0.9631	0.2975	0.3769	0.1504	-0.2989	0.1007	-0.0411	0.1224	-0.495	0.165	49.2982	10.319	52.2798	11.9213	30.6895	14.3911	0.5924
2.9	-0.2776	0.119	-0.3378	0.1156	-0.2979	0.1127	72.9875	17.603	58.9038	18.7137	47.5786	13.4377	0.6262	0.1737	0.7193	0.2351	0.2658	0.1061	0.4327	0.1068	0.4804	0.0976	0.6099	0.0842	96.8651	23.7383	84.5835	22.6633	68.4548	24.4464	0.9329	0.2636	0.8551	0.2452	0.3961	0.1738	-0.2976	0.101	-0.0453	0.1216	-0.4974	0.1649	43.0432	9.4329	55.9913	14.1696	40.3001	19.4901	0.5919
2.93333	-0.2753	0.1188	-0.3316	0.1168	-0.2899	0.1132	59.0339	16.0897	59.7561	17.3184	52.39	15.6996	0.6274	0.1798	0.7443	0.2385	0.3384	0.1553	0.4376	0.1088	0.476	0.0978	0.6094	0.086	104.309	35.5139	92.798	29.6761	58.6234	17.9222	0.9444	0.2514	0.8126	0.2795	0.4108	0.1927	-0.2943	0.1015	-0.047	0.122	-0.4972	0.1646	46.299	10.643	56.4076	13.5014	30.0508	16.1729	0.6408
2.96667	-0.2701	0.1183	-0.3244	0.1176	-0.2807	0.114	63.3889	18.9015	64.9451	17.1947	60.5267	20.9059	0.6775	0.1931	0.7898	0.2362	0.3645	0.1832	0.4364	0.1091	0.4755	0.0973	0.6134	0.0868	101.481	27.3659	79.1457	18.9745	73.8425	27.3441	0.8946	0.2583	0.805	0.2486	0.3796	0.1738	-0.2925	0.1024	-0.0501	0.122	-0.4928	0.165	49.1648	11.2603	52.2482	13.9871	35.7606	18.9349	0.6381
3	-0.2684	0.1184	-0.3165	0.1188	-0.2769	0.1136	52.3891	11.6274	60.1368	16.8565	48.633	21.1757	0.6412	0.1769	0.8065	0.2371	0.304	0.1291	0.4437	0.1097	0.4712	0.0963	0.6149	0.0844	94.9096	24.0282	85.5151	20.0482	72.6563	25.1191	0.8482	0.269	0.7626	0.2438	0.3408	0.1486	-0.2945	0.1029	-0.0539	0.1222	-0.4887	0.1659	47.8447	10.8967	61.1505	15.0991	29.6767	14.0779	0.6307
3.03333	-0.2628	0.1184	-0.3093	0.12	-0.2668	0.1143	60.9739	14.6539	63.5354	18.501	50.9249	14.9431	0.6879	0.1837	0.7668	0.2434	0.3214	0.1575	0.4489	0.1089	0.4644	0.0949	0.6211	0.0811	89.2595	21.7845	87.1205	21.2772	71.9518	22.4367	0.8033	0.2444	0.7642	0.2302	0.3927	0.1922	-0.2959	0.1034	-0.0507	0.1225	-0.483	0.1658	52.5165	12.5351	61.886	14.7589	31.4582	15.2509	0.6525
3.06667	-0.2599	0.1187	-0.3028	0.1202	-0.2577	0.1142	63.3899	14.7086	58.1208	16.1932	41.4987	10.355	0.6609	0.1752	0.8058	0.2457	0.3017	0.1288	0.4471	0.1092	0.4577	0.0919	0.6262	0.0793	91.3789	25.1291	102.076	38.7058	81.0045	26.8763	0.8891	0.2734	0.8055	0.2476	0.3224	0.1137	-0.2935	0.1036	-0.0515	0.1231	-0.4712	0.1673	47.5899	12.3756	61.812	14.6637	41.675	21.869	0.6314
3.1	-0.256	0.1188	-0.2967	0.1201	-0.2498	0.1143	61.5737	13.1135	56.7018	18.83	41.0248	11.0213	0.6889	0.1756	0.7904	0.2417	0.3135	0.1363	0.4469	0.1089	0.4465	0.0908	0.6223	0.0793	90.7514	23.8869	101.974	27.463	71.5963	19.7826	0.8794	0.2948	0.7956	0.2363	0.3389	0.1265	-0.2897	0.1039	-0.0498	0.1237	-0.4615	0.1691	47.1943	11.1535	51.8231	12.0344	39.5312	18.9265	0.6088
3.13333	-0.2557	0.1183	-0.2938	0.1193	-0.2394	0.1147	68.5915	14.18	55.6673	17.8399	43.5612	12.3187	0.7413	0.2119	0.7233	0.2292	0.3256	0.1574	0.4418	0.1088	0.4422	0.0907	0.6156	0.0808	96.8279	24.466	96.6985	25.2994	59.3441	17.7556	0.7729	0.2643	0.7638	0.2242	0.3245	0.1236	-0.2879	0.1039	-0.0491	0.1241	-0.4521	0.1716	58.8549	12.0395	53.8096	12.6272	36.0441	16.1819	0.5954
3.16667	-0.2574	0.1176	-0.2927	0.1185	-0.2257	0.1155	71.5629	16.9468	69.9428	28.67	56.2197	16.5919	0.8663	0.3452	0.6682	0.2561	0.256	0.1238	0.4306	0.1082	0.4368	0.0903	0.6157	0.0801	110.022	32.9324	79.8933	20.0595	65.2284	18.6286	0.9095	0.2676	0.7829	0.2383	0.3416	0.1296	-0.2878	0.1034	-0.0434	0.1248	-0.4378	0.1754	54.8637	13.0495	61.651	16.769	47.4021	25.716	0.6048
3.2	-0.2574	0.1171	-0.2884	0.1182	-0.2143	0.1155	66.3496	13.8608	61.9576	16.6109	59.5178	18.8963	0.73	0.1937	0.655	0.2089	0.252	0.1215	0.4258	0.1081	0.4409	0.0892	0.6187	0.0794	105.712	26.9539	71.5873	17.6302	69.0791	21.4373	0.9439	0.2807	0.7689	0.2474	0.3299	0.183	-0.2855	0.1036	-0.0425	0.1249	-0.4277	0.1782	55.2834	11.6477	47.393	12.4141	41.8803	25.3363	0.6499
3.23333	-0.2534	0.117	-0.2829	0.1179	-0.2108	0.116	60.2077	13.0677	63.0327	19.8391	50.6725	14.8979	0.6967	0.1919	0.6375	0.2108	0.2643	0.1201	0.4082	0.11	0.4392	0.0902	0.6219	0.0792	115.107	33.9835	61.5597	14.1772	61.2323	22.662	0.9339	0.271	0.7219	0.2348	0.3536	0.1653	-0.2832	0.1035	-0.0429	0.1246	-0.4235	0.1788	48.1434	10.4709	41.4213	9.9008	32.4253	18.9006	0.6487
3.26667	-0.2468	0.117	-0.2736	0.118	-0.2058	0.1164	55.6932	12.6681	64.6218	17.5558	46.8417	12.292	0.7116	0.2025	0.621	0.2167	0.2298	0.1101	0.4025	0.1125	0.4433	0.0915	0.6145	0.0808	85.4274	22.7464	72.6439	18.6681	66.1246	25.4148	0.9838	0.2888	0.7934	0.2419	0.3173	0.1337	-0.2825	0.1032	-0.0434	0.1242	-0.4176	0.1789	50.9254	10.7893	51.4042	12.8513	28.1798	14.729	0.6237
3.3	-0.2398	0.1171	-0.2691	0.1183	-0.2049	0.1167	57.5683	13.9868	65.7508	16.8762	52.8866	12.8844	0.6604	0.1872	0.6703	0.2257	0.2472	0.1177	0.3983	0.114	0.4341	0.093	0.6117	0.0807	112.758	43.9238	79.379	20.6623	63.7788	20.889	0.9788	0.274	0.834	0.2291	0.2837	0.1205	-0.2812	0.1028	-0.0424	0.1237	-0.4143	0.1792	46.5913	9.7842	57.6512	16.3035	41.8013	19.6314	0.6235
3.33333	-0.233	0.1172	-0.2645	0.1187	-0.2021	0.117	63.1501	13.6838	69.6361	18.7048	49.933	12.9176	0.7009	0.197	0.7059	0.2332	0.2769	0.1297	0.3748	0.1166	0.419	0.0946	0.6152	0.0809	120.695	51.5512	89.5535	20.9831	57.1904	15.2661	1.0956	0.3139	0.7703	0.2209	0.3175	0.1439	-0.2783	0.1023	-0.0381	0.1234	-0.4119	0.1797	46.0625	10.1574	53.1372	12.8111	37.0274	22.5408	0.6447
3.36667	-0.2276	0.1172	-0.2602	0.1186	-0.1956	0.1173	65.6397	13.5908	65.0912	16.5184	52.1984	15.9751	0.7115	0.1933	0.7032	0.2136	0.2604	0.1248	0.3806	0.1162	0.4064	0.0958	0.6103	0.0833	104.737	32.9519	88.5841	22.9727	68.5183	18.8502	0.9518	0.2828	0.853	0.2286	0.3114	0.1347	-0.2764	0.1016	-0.0318	0.1233	-0.4083	0.1794	47.4206	11.5666	56.6575	14.651	35.6574	17.3235	0.6537
3.4	-0.2217	0.117	-0.2557	0.1194	-0.188	0.118	63.2699	13.8705	73.3315	20.6664	51.9367	15.6439	0.7271	0.2012	0.7148	0.2154	0.2513	0.1222	0.3814	0.1184	0.3984	0.0961	0.6054	0.0861	113.953	39.3881	80.5347	19.6758	69.2688	20.3762	0.8902	0.277	0.7922	0.2157	0.3636	0.1316	-0.276	0.1011	-0.0238	0.1232	-0.406	0.1788	51.4625	10.728	53.1986	14.963	42.0558	19.9889	0.6363
3.43333	-0.2115	0.1176	-0.2516	0.12	-0.1825	0.119	65.9533	15.7598	66.4456	17.6595	49.2329	13.5164	0.7228	0.2028	0.6661	0.205	0.2481	0.1301	0.3888	0.1191	0.3936	0.0962	0.6002	0.0879	94.2922	23.2753	74.3579	16.2248	62.675	16.5765	0.8578	0.2674	0.8325	0.2165	0.4215	0.1772	-0.2725	0.1013	-0.0228	0.123	-0.3999	0.18	47.4483	10.5046	62.0171	17.5331	36.2056	20.1691	0.5895
3.46667	-0.2021	0.118	-0.252	0.1206	-0.1787	0.1194	70.5243	17.5481	62.8719	19.2749	53.4397	13.6066	0.7154	0.1887	0.6648	0.2055	0.2487	0.1243	0.4002	0.1173	0.3877	0.0991	0.5934	0.0893	94.1693	29.2771	94.9045	30.6145	63.5495	17.8574	0.8718	0.2678	0.873	0.2852	0.4015	0.159	-0.2687	0.1019	-0.0164	0.1229	-0.3967	0.1806	51.1457	11.7488	64.3966	18.445	33.9816	16.6593	0.5728
3.5	-0.1926	0.1179	-0.2456	0.1213	-0.1737	0.1202	69.0002	17.1237	67.173	16.6224	47.6965	12.573	0.7344	0.1981	0.6715	0.222	0.2275	0.1216	0.4075	0.1161	0.3848	0.0997	0.5901	0.0903	91.4482	22.729	87.9381	28.2833	64.7249	18.7833	1.0136	0.2856	0.8225	0.2228	0.3431	0.1426	-0.2685	0.102	-0.0118	0.1228	-0.3927	0.1798	52.3137	11.7902	72.8485	16.5273	33.824	19.8285	0.573
3.53333	-0.183	0.1178	-0.2393	0.1211	-0.1686	0.1205	83.2288	31.7451	72.0202	27.8155	49.4347	14.2428	0.7622	0.2186	0.7355	0.2342	0.2162	0.1155	0.4012	0.1189	0.379	0.1016	0.5829	0.0899	101.583	43.4688	74.4024	22.4698	68.8937	19.3079	0.928	0.2792	0.7332	0.2274	0.4014	0.1615	-0.2674	0.1022	-0.0092	0.1228	-0.3861	0.1804	57.5835	12.8295	70.457	15.8278	38.1179	19.5995	0.5852
3.56667	-0.1703	0.1179	-0.2336	0.1212	-0.1641	0.1208	80.3612	22.0309	71.3196	20.2102	51.2219	14.1681	0.7062	0.1766	0.7473	0.2201	0.2085	0.1118	0.4099	0.1186	0.3709	0.102	0.5743	0.0901	83.4003	20.1223	96.7841	44.0376	63.565	16.573	0.9718	0.3001	0.768	0.2633	0.3891	0.1449	-0.2634	0.1029	-0.0048	0.1225	-0.3803	0.1827	57.6382	12.4748	71.9912	16.5181	30.8363	18.8527	0.6163
3.6	-0.1623	0.1178	-0.2288	0.1226	-0.1546	0.1215	71.4287	16.681	64.2591	17.2665	59.9008	17.3981	0.6626	0.1731	0.7184	0.2161	0.2332	0.1238	0.4172	0.118	0.3766	0.0987	0.5663	0.0905	91.7877	22.8082	80.8778	24.3813	57.1825	15.8623	0.947	0.2608	0.8404	0.2298	0.3615	0.1388	-0.2601	0.1034	-0.0023	0.1223	-0.3751	0.1847	56.9243	12.2384	62.9686	15.5659	25.1452	16.0955	0.574
3.63333	-0.1506	0.118	-0.2253	0.1238	-0.1474	0.1219	74.0159	22.4392	61.4452	15.1036	55.1627	15.2725	0.6516	0.1773	0.7166	0.2175	0.279	0.1274	0.4161	0.1192	0.3752	0.0972	0.5624	0.0905	110.394	33.9546	71.0321	18.3997	56.1555	14.4755	0.9919	0.3078	0.8087	0.2676	0.3694	0.1362	-0.2587	0.1035	-0.0052	0.1217	-0.3676	0.1868	58.453	12.3863	67.353	14.7201	22.3347	15.5362	0.5777
3.66667	-0.1402	0.1189	-0.2211	0.1246	-0.1379	0.123	73.9614	22.9048	56.7636	14.334	64.5648	18.3893	0.7439	0.1984	0.7094	0.2215	0.2964	0.144	0.4241	0.117	0.3695	0.0959	0.5599	0.0912	91.143	25.4274	80.8821	20.5459	60.3076	16.9256	0.8657	0.2668	0.6982	0.2401	0.3849	0.1428	-0.2558	0.1037	-0.007	0.1213	-0.36	0.1882	65.0465	14.0963	58.2269	12.9283	25.1205	11.3471	0.561
3.7	-0.1299	0.1186	-0.2167	0.1249	-0.135	0.1234	68.5643	21.6483	65.9124	17.353	65.4154	20.2387	0.7141	0.1871	0.7472	0.2276	0.2763	0.1192	0.4221	0.1162	0.3651	0.0961	0.5588	0.0912	72.234	17.8333	94.0501	24.4743	57.3394	16.3772	0.9296	0.2743	0.7529	0.232	0.3781	0.1582	-0.2526	0.1036	-0.009	0.1211	-0.3525	0.1904	65.6711	14.4605	58.8407	14.0446	29.5537	17.0921	0.58
3.73333	-0.1337	0.1187	-0.2135	0.1251	-0.1323	0.1234	76.3876	23.7988	63.0559	15.7263	57.3421	13.7315	0.6846	0.1885	0.7282	0.2266	0.2776	0.1172	0.4126	0.1176	0.3643	0.0964	0.5621	0.0903	92.1275	27.154	89.9347	20.8817	50.4482	15.7034	0.8809	0.2748	0.7397	0.2262	0.4001	0.1457	-0.2499	0.1024	-0.0103	0.1211	-0.3446	0.1916	65.553	13.8523	61.6662	17.7839	30.2881	14.1315	0.6018
3.76667	-0.1281	0.1186	-0.2092	0.1251	-0.1322	0.1228	72.0655	17.3457	65.9731	16.5897	65.0574	20.6448	0.6999	0.2026	0.7032	0.2183	0.2698	0.1116	0.4056	0.1177	0.3689	0.0955	0.5602	0.0904	99.7852	23.4921	95.1791	27.9349	55.949	14.7255	0.9676	0.2604	0.8717	0.2466	0.4347	0.1409	-0.2441	0.1021	-0.0078	0.1208	-0.3357	0.1931	65.2246	14.018	62.656	17.1757	30.8724	13.7943	0.6225
3.8	-0.1227	0.1188	-0.2105	0.1243	-0.1297	0.1223	65.2882	15.0384	69.7464	17.1538	53.1273	14.147	0.7701	0.2031	0.7193	0.2161	0.3175	0.1482	0.3992	0.1186	0.3634	0.0964	0.5577	0.0913	86.6593	21.9205	76.5377	22.4558	68.6365	17.5826	0.9841	0.2609	0.7714	0.2216	0.4314	0.1395	-0.2481	0.1013	-0.0092	0.1203	-0.3302	0.1937	64.5152	12.6856	63.5124	17.6062	31.7878	14.2342	0.6446
3.83333	-0.1186	0.1192	-0.2128	0.1234	-0.1257	0.122	72.0528	17.1605	73.093	17.0373	49.2892	11.3809	0.7447	0.2	0.7679	0.2238	0.2931	0.1247	0.3955	0.1186	0.3584	0.0957	0.5518	0.0915	89.9433	22.6898	69.9651	15.4966	67.9288	19.2222	1.0268	0.2852	0.7669	0.2405	0.394	0.1439	-0.2502	0.101	-0.0045	0.1197	-0.3254	0.1931	62.6849	12.6752	56.8486	16.134	42.1992	17.6736	0.6772
3.86667	-0.1118	0.1191	-0.2125	0.1225	-0.1193	0.1219	72.7297	17.6863	70.5051	16.2343	58.5787	15.6589	0.8124	0.2107	0.7041	0.2166	0.2606	0.116	0.398	0.1194	0.3588	0.0946	0.5447	0.0921	74.723	18.2675	82.3225	22.4079	62.1853	14.6693	1.0889	0.2868	0.7922	0.2446	0.3847	0.151	-0.2525	0.1008	4.21e-05	0.1193	-0.3188	0.1936	57.7139	11.3685	49.5163	12.4627	48.0106	19.72	0.6731
3.9	-0.1109	0.1187	-0.2183	0.1214	-0.1156	0.1216	69.5793	15.0561	77.1959	21.2273	49.4392	12.8785	0.8094	0.2056	0.7236	0.2332	0.2609	0.1139	0.4056	0.1186	0.3619	0.0932	0.54	0.0933	88.9045	24.3074	83.9616	26.7469	67.0233	16.7456	1.0853	0.2798	0.8442	0.2446	0.3854	0.1446	-0.2571	0.1005	0.0035	0.1193	-0.3126	0.1943	52.2295	10.0842	58.2205	12.8989	46.9011	19.2702	0.6759
3.93333	-0.1046	0.1195	-0.2232	0.1197	-0.1123	0.1213	72.6625	16.7397	76.6806	18.9895	56.3214	12.9898	0.7422	0.2066	0.7246	0.2228	0.2313	0.1193	0.4104	0.1188	0.3613	0.093	0.5333	0.0941	79.7229	18.8795	76.7574	25.3274	57.8577	13.8983	1.0177	0.2888	0.8799	0.306	0.3728	0.1471	-0.2607	0.1	0.0066	0.1197	-0.3069	0.1957	47.8344	9.5327	58.4959	15.4255	48.1849	21.322	0.6993
3.96667	-0.0973	0.1199	-0.2218	0.1191	-0.1109	0.121	71.2332	18.079	68.6014	17.5584	58.9205	14.6042	0.7652	0.2097	0.7278	0.2141	0.2601	0.1138	0.4117	0.1187	0.3655	0.0914	0.525	0.096	68.2631	18.3094	67.2448	17.7238	66.2351	18.1594	1.0107	0.2803	0.7734	0.2511	0.3985	0.1516	-0.2636	0.0996	0.0086	0.1201	-0.3019	0.1973	52.3424	9.6241	55.0643	13.6786	40.6504	18.6354	0.7031
4	-0.0931	0.1199	-0.2198	0.1195	-0.1132	0.1202	79.1629	17.4272	72.4769	20.4334	67.5468	20.0492	0.8531	0.2151	0.6986	0.2117	0.2638	0.1173	0.4144	0.1184	0.3687	0.0908	0.5233	0.0981	77.6775	19.0556	67.1852	20.0457	56.6429	14.3503	0.8936	0.243	0.6827	0.2549	0.3484	0.1368	-0.2666	0.0993	0.008	0.1204	-0.3019	0.1986	53.1895	10.8047	63.2087	15.6526	44.872	23.0285	0.6952
4.03333	-0.0892	0.1206	-0.2207	0.1201	-0.1115	0.1201	79.4949	16.3977	70.4126	18.2453	69.1543	21.3351	0.8725	0.2116	0.7621	0.2359	0.2728	0.1218	0.4194	0.1177	0.3746	0.0887	0.5287	0.0986	92.245	23.6931	80.1406	26.0792	59.1025	17.3076	0.9504	0.2627	0.6314	0.2639	0.3433	0.1453	-0.2722	0.0986	0.01	0.1213	-0.3042	0.1997	58.9657	10.8945	58.1389	14.4951	44.5106	22.169	0.7511
4.06667	-0.0892	0.121	-0.2134	0.1212	-0.1116	0.1192	86.0787	18.1355	73.1882	15.2721	57.6641	14.4127	0.8145	0.2029	0.7348	0.2276	0.28	0.1192	0.4179	0.1172	0.3781	0.0886	0.5258	0.1008	97.3332	23.945	83.64	23.8603	61.848	21.218	0.9032	0.2458	0.629	0.2312	0.2935	0.1767	-0.2752	0.0978	0.0095	0.122	-0.3057	0.2008	63.421	12.8819	54.8594	11.9508	43.2714	22.549	0.7217
4.1	-0.088	0.121	-0.2049	0.1219	-0.1125	0.1185	78.6021	17.3125	72.0345	18.5476	62.0398	14.4231	0.8422	0.217	0.6812	0.2193	0.3095	0.1245	0.4218	0.1163	0.3758	0.0893	0.5068	0.107	82.8142	20.9356	78.7954	20.5376	101.749	52.4673	0.9063	0.2479	0.6828	0.2539	0.3255	0.1356	-0.2775	0.0976	0.0053	0.1221	-0.3046	0.2017	61.0081	11.4886	54.4221	13.1756	36.2499	16.1643	0.7275
4.13333	-0.0833	0.1213	-0.193	0.1222	-0.1143	0.1181	66.0926	13.5162	75.1578	25.136	60.0422	19.858	0.822	0.2094	0.6599	0.2165	0.3014	0.1346	0.4297	0.1157	0.3787	0.0898	0.5014	0.1082	92.9897	21.1316	79.4772	18.4474	76.9509	21.3418	1.0223	0.2839	0.7294	0.2697	0.403	0.1386	-0.2823	0.0972	0.008	0.1226	-0.3067	0.2019	64.8652	14.3263	55.7739	12.6695	42.2097	16.7118	0.7792
4.16667	-0.0712	0.1211	-0.1848	0.1229	-0.118	0.1177	85.2411	29.6546	71.194	19.6035	65.119	16.4247	0.8338	0.2118	0.6622	0.2238	0.3385	0.1319	0.4371	0.1156	0.3822	0.0903	0.5002	0.1097	85.2633	21.3739	84.4289	21.8687	80.9766	21.9681	1.0473	0.2726	0.7865	0.2648	0.399	0.1578	-0.2856	0.0966	0.0077	0.1224	-0.315	0.2013	64.4756	13.8988	57.4991	12.9232	32.087	14.7049	0.7531
4.2	-0.0618	0.1211	-0.1714	0.1234	-0.1201	0.1175	73.124	17.2271	70.9716	21.5973	49.0815	12.0599	0.8416	0.2137	0.7072	0.2331	0.3127	0.1306	0.4359	0.1185	0.3883	0.0903	0.4923	0.1105	107.112	48.8168	77.7781	30.7494	66.6532	18.027	1.1199	0.3058	0.837	0.2908	0.4204	0.1571	-0.2859	0.0972	0.0069	0.1224	-0.32	0.201	61.7458	13.0923	60.019	12.5761	37.5465	15.9595	0.7907
4.23333	-0.0553	0.1214	-0.1677	0.1236	-0.1302	0.1177	67.5931	14.8232	73.099	19.4174	59.361	21.4301	0.8279	0.2135	0.7228	0.2506	0.2917	0.125	0.4414	0.1175	0.397	0.0887	0.4847	0.1116	108.127	44.7581	90.1163	22.6968	84.9301	25.2495	0.8345	0.6657	0.8048	0.2691	0.4222	0.1776	-0.2868	0.0978	0.0056	0.1223	-0.3198	0.2014	60.3653	14.3421	56.0048	12.7122	32.6842	15.5814	0.7935
4.26667	-0.0556	0.1217	-0.1509	0.1245	-0.1373	0.1171	78.3135	22.242	84.2772	22.2768	54.5557	12.9746	0.7702	0.2158	0.6329	0.1894	0.2669	0.1176	0.4408	0.1172	0.3919	0.0879	0.4866	0.1107	86.5175	21.5638	92.0598	22.3609	87.7469	30.3002	0.9758	0.279	0.766	0.2573	0.4334	0.1536	-0.2895	0.0985	0.0058	0.1217	-0.3204	0.2024	57.9123	12.4989	64.4003	15.7949	39.5732	16.4017	0.7813
4.3	-0.0545	0.1214	-0.1512	0.1238	-0.142	0.1168	87.5418	22.9358	84.3824	21.9039	47.8052	11.2686	0.7697	0.2043	0.6581	0.2002	0.2953	0.1195	0.4353	0.1177	0.3935	0.0861	0.488	0.1102	89.2528	39.3556	82.0222	18.1536	60.2273	16.7951	1.0044	0.2621	0.7902	0.25	0.4772	0.1646	-0.2873	0.0989	0.004	0.1211	-0.317	0.2044	57.0847	14.2172	67.2151	14.4332	35.4851	15.6635	0.7715
4.33333	-0.0591	0.1215	-0.1495	0.1241	-0.1433	0.1164	86.9899	24.2538	81.6562	21.9976	54.6811	13.2139	0.824	0.2408	0.6421	0.191	0.3221	0.1299	0.4333	0.1173	0.3942	0.0857	0.4877	0.1108	71.9999	18.5287	95.3525	22.7197	81.9481	24.0408	0.986	0.2691	0.8242	0.2656	0.4524	0.1574	-0.2866	0.0994	7.83e-05	0.1206	-0.3135	0.2068	54.1615	12.3093	74.6088	16.9877	38.798	19.0222	0.7119
4.36667	-0.0585	0.1217	-0.1402	0.1249	-0.1431	0.1165	78.6667	22.2073	78.8239	19.9892	52.5321	11.8647	0.8301	0.2395	0.6837	0.196	0.2901	0.1147	0.4255	0.1186	0.3846	0.0867	0.4845	0.1103	82.9067	22.3104	90.6511	24.3076	68.3488	19.9393	1.0436	0.2627	0.72	0.2226	0.4646	0.1615	-0.2825	0.1003	-0.0014	0.1203	-0.3125	0.2078	61.9182	13.5196	77.3291	16.4977	41.8462	20.0932	0.7034
4.4	-0.0652	0.1208	-0.1374	0.1252	-0.1403	0.1166	73.5031	18.9313	63.0924	15.1798	72.874	20.6617	0.9098	0.2391	0.7797	0.2151	0.3194	0.1265	0.4221	0.1193	0.3775	0.0872	0.48	0.1105	86.9788	24.0458	101.32	22.545	69.2061	19.325	1.0761	0.2807	0.5963	0.2143	0.4973	0.1657	-0.2796	0.1009	-0.0049	0.1201	-0.312	0.2082	59.4492	13.3398	70.1935	15.2146	35.4875	17.3752	0.6839
4.43333	-0.0644	0.1207	-0.1381	0.1245	-0.1359	0.1161	72.4357	17.2077	64.035	17.7697	63.1862	17.7615	0.9585	0.2827	0.8214	0.2226	0.334	0.1387	0.4261	0.1173	0.3699	0.088	0.4804	0.1095	93.0957	28.7261	93.4638	23.3049	63.1428	15.8387	1.0487	0.2829	0.6844	0.2029	0.5242	0.1722	-0.2754	0.1014	-0.0121	0.1198	-0.3099	0.2082	61.7786	13.478	67.2409	15.4241	33.6834	17.0039	0.6844
4.46667	-0.0638	0.1202	-0.143	0.1234	-0.134	0.1157	62.942	16.1519	61.1867	15.1744	84.3061	18.5822	0.8635	0.2191	0.8278	0.222	0.3558	0.1306	0.433	0.1156	0.3567	0.0892	0.4796	0.108	87.8566	25.4409	97.6549	24.9561	60.589	18.0541	0.896	0.2535	0.7523	0.2059	0.5313	0.1795	-0.2725	0.1018	-0.0137	0.1198	-0.3083	0.207	65.4799	14.8715	61.8594	13.4267	41.8876	20.3334	0.7446
4.5	-0.0598	0.1198	-0.1422	0.123	-0.1361	0.1156	59.312	16.1457	63.435	15.5271	78.7631	17.9985	0.9238	0.2265	0.7597	0.2114	0.345	0.1182	0.4309	0.1136	0.3402	0.092	0.48	0.1065	105.135	33.1791	100.529	25.4345	54.2726	14.4111	0.9524	0.2892	0.8332	0.2256	0.5146	0.1851	-0.2713	0.1016	-0.0137	0.1201	-0.3072	0.2061	65.01	15.2958	56.1552	13.3605	36.3547	18.6221	0.6629
4.53333	-0.0556	0.1205	-0.1389	0.1231	-0.1384	0.1157	72.6236	22.2543	53.8703	12.4822	75.4822	18.5521	0.9272	0.2348	0.781	0.2264	0.354	0.1274	0.4266	0.1122	0.3297	0.0949	0.4782	0.1057	86.0901	23.0732	90.871	20.7372	60.8869	14.471	0.9559	0.3028	0.7918	0.2206	0.4578	0.163	-0.2695	0.1013	-0.0076	0.1207	-0.3028	0.2058	60.3659	12.5776	49.9795	11.8778	39.8207	19.249	0.6282
4.56667	-0.0549	0.1196	-0.1374	0.1231	-0.1399	0.116	65.0294	16.627	57.557	12.9869	72.5288	18.0334	0.8058	0.2131	0.7324	0.2346	0.3657	0.1293	0.4239	0.1106	0.3263	0.0968	0.4762	0.1048	73.0567	20.7247	97.1892	21.8202	56.5438	12.6808	1.0241	0.2863	0.7576	0.2332	0.4588	0.1697	-0.2685	0.101	-0.0042	0.1213	-0.3019	0.2048	59.2576	14.779	66.1948	16.6305	41.5836	21.7795	0.6506
4.6	-0.0466	0.1197	-0.1359	0.1236	-0.1419	0.1164	61.9049	19.0102	54.7388	13.1591	66.8449	18.0941	0.8359	0.2242	0.666	0.2067	0.3546	0.1234	0.4224	0.1102	0.3279	0.0978	0.4708	0.1036	93.7343	28.0934	86.7329	20.671	65.8576	20.4239	1.0881	0.2922	0.7806	0.2551	0.4259	0.1593	-0.2663	0.1009	0.0042	0.1216	-0.3025	0.2028	50.8592	9.9221	62.025	14.3986	44.6889	21.2289	0.6304
4.63333	-0.0435	0.1193	-0.1337	0.124	-0.1423	0.1163	80.1114	21.1505	58.2427	15.3628	72.2048	19.2533	0.8794	0.2308	0.682	0.2191	0.3535	0.1414	0.4168	0.1103	0.3311	0.0981	0.4642	0.1036	101.07	25.172	74.8408	16.7477	70.9192	23.6446	1.0212	0.2774	0.7897	0.2519	0.4767	0.1763	-0.262	0.1008	0.0118	0.1223	-0.3051	0.2	60.0288	12.4403	75.6801	17.7124	55.7595	26.3074	0.6472
4.66667	-0.0394	0.1187	-0.1355	0.1242	-0.1454	0.1164	76.0974	21.049	61.0055	17.4542	67.6522	15.8263	0.8703	0.2255	0.6336	0.2123	0.3899	0.1354	0.4063	0.1109	0.3414	0.098	0.4599	0.1031	94.8743	23.4022	76.702	16.0328	68.1395	18.4782	0.9317	0.2722	0.8262	0.2604	0.4619	0.1695	-0.2588	0.1012	0.0176	0.1234	-0.3086	0.1972	57.7789	11.3985	81.9001	20.6181	52.405	25.314	0.6898
4.7	-0.0406	0.1183	-0.1302	0.1242	-0.1465	0.1165	82.0411	17.6939	50.351	12.2697	59.2537	14.2394	0.8864	0.2252	0.6398	0.2037	0.4345	0.1476	0.3914	0.1135	0.3452	0.0984	0.4551	0.1028	105.355	29.878	69.9702	16.7961	69.1713	16.3861	0.9718	0.296	0.8034	0.2558	0.4616	0.1611	-0.2539	0.1008	0.0209	0.1234	-0.306	0.1964	57.3828	11.6144	76.2948	16.3054	43.018	19.2291	0.7062
4.73333	-0.0401	0.1185	-0.1263	0.1246	-0.148	0.1161	91.8931	24.0291	63.6048	14.5773	57.2415	13.8539	0.8854	0.2233	0.6635	0.2169	0.4306	0.1415	0.3849	0.1148	0.3461	0.0987	0.4498	0.1026	73.9539	18.3174	74.6675	19.1491	68.6596	17.2835	0.9803	0.2922	0.8101	0.2439	0.4774	0.1641	-0.2488	0.1008	0.021	0.1234	-0.3047	0.1957	70.0409	16.5554	70.904	16.5934	41.2824	20.4345	0.702
4.76667	-0.0498	0.1187	-0.1261	0.1248	-0.1479	0.1161	75.2039	16.8561	74.4198	22.0134	58.419	13.5835	0.8388	0.2202	0.6666	0.2112	0.3848	0.1273	0.3773	0.1154	0.3462	0.0998	0.4452	0.1028	68.5446	24.8338	83.6868	22.1726	62.8183	14.7126	1.0144	0.2881	0.8398	0.2402	0.4788	0.1689	-0.2477	0.1007	0.02	0.123	-0.3004	0.1956	72.2688	15.5304	69.7456	18.1372	46.4362	26.7047	0.6592
4.8	-0.0611	0.1179	-0.1322	0.1243	-0.1484	0.1161	72.6362	17.3961	72.0402	17.3087	58.3514	14.9532	0.8945	0.2284	0.702	0.2228	0.4565	0.1591	0.3843	0.1158	0.3477	0.1005	0.4475	0.1028	72.1593	25.8505	83.9834	19.6398	62.6687	15.2422	1.03	0.2994	0.8559	0.2454	0.5369	0.1712	-0.2482	0.1005	0.018	0.1227	-0.3004	0.1955	74.3308	15.5335	59.5933	13.6332	44.3155	26.1113	0.6519
4.83333	-0.0648	0.1168	-0.1431	0.1235	-0.1478	0.1161	72.1022	17.724	76.4742	24.8619	53.013	12.825	0.9616	0.2324	0.7361	0.2296	0.3889	0.1522	0.389	0.1166	0.3469	0.101	0.4508	0.1019	74.8931	23.8182	84.1535	22.8787	62.6233	15.6549	1.0172	0.2957	0.9074	0.2791	0.498	0.147	-0.2473	0.1002	0.0153	0.1226	-0.2986	0.1961	76.0811	15.0104	51.0092	11.4005	47.155	24.3437	0.6544
4.86667	-0.0607	0.1175	-0.1478	0.1228	-0.1511	0.1161	87.6857	31.5061	77.1559	28.5256	63.3561	15.777	1.0087	0.2465	0.6006	0.2306	0.4003	0.1409	0.3871	0.1167	0.3456	0.1018	0.4593	0.1004	82.4896	27.3837	79.0875	19.1072	75.3337	18.9579	1.1192	0.3147	0.8104	0.2498	0.537	0.1784	-0.2394	0.1003	0.0172	0.1219	-0.2978	0.1974	73.2402	14.8309	61.8548	13.2292	42.3832	22.0427	0.7122
4.9	-0.0648	0.117	-0.1497	0.1232	-0.1516	0.1162	86.3071	29.5328	64.2465	20.1574	64.7219	17.2352	0.9772	0.2476	0.6802	0.2343	0.3721	0.1365	0.3882	0.117	0.346	0.1024	0.4594	0.1	73.944	16.6134	91.7401	20.685	62.2127	15.0957	1.1181	0.3213	0.8189	0.2525	0.6081	0.2831	-0.235	0.1001	0.017	0.1211	-0.2913	0.1997	77.1596	14.5258	63.9173	13.2175	39.0829	18.0193	0.7089
4.93333	-0.0727	0.116	-0.1508	0.1232	-0.1432	0.1164	83.9204	27.5504	57.4195	14.0746	72.0014	19.8428	0.8688	0.2817	0.6846	0.2121	0.3691	0.1322	0.3874	0.117	0.3496	0.103	0.4594	0.101	83.6694	23.8827	98.475	23.3322	73.1099	19.296	1.1108	0.3154	0.8319	0.2633	0.5168	0.1891	-0.23	0.0998	0.0212	0.1201	-0.2769	0.203	74.2686	13.8396	59.9175	11.9938	45.6602	21.1931	0.7093
4.96667	-0.0777	0.1158	-0.1516	0.1237	-0.1354	0.1175	84.1033	18.9412	62.831	14.9879	71.7134	19.5447	0.9639	0.2683	0.7468	0.237	0.3383	0.1297	0.3821	0.1181	0.3548	0.1022	0.4612	0.1015	79.9201	18.1065	81.7871	20.4644	73.7387	18.8666	1.13	0.3197	0.8089	0.2669	0.4473	0.1876	-0.2287	0.0992	0.0273	0.1196	-0.2726	0.2039	75.8564	15.6287	72.0998	14.6883	28.8836	12.1443	0.732
[truncated: 131 more columns]
