# Supplementary material for: Neural circuit mechanisms for transforming learned olfactory valences into wind-oriented movement
Source: eLife. 2023 Sep 18;12:e85756. doi: 10.7554/eLife.85756 (PMC10588983; doi:10.7554/eLife.85756)
Supplement: Figure 1—source data 1. [file elife-85756-fig1-data1.xlsx]

## Sheet: Sheet1
	paired																				unpaired
0	-0.01474	-0.2149	0.03194	0.3777	-0.154	0.03272	0.02635	-0.06621	-0.1534	-0.02476	0.1623	-0.0558	-0.0933	0.3823	-0.0634	-0.2403	-0.1137	0.3702	-0.2132	0.06572	-0.06186	-0.1387	0.05119	0.05724	0.1543	-0.507	-0.06147	-0.3076
1	0.6131	0.5377	0.68	0.7922	0.6325	0.593	0.6423	0.6042	0.7559	0.5558	0.4193	0.6479	0.5055	0.1735	0.709	0.6072	0.2079	0.5899	0.5587	0.3995	0.1573	-0.2774	0.08869	-0.1824	0.1438	0.01401	0.1733	0.08398
2	0.8833	0.7304	0.7573	0.8035	0.6652	0.7918	0.743	0.7559	0.7085	0.6118	0.7643	0.745	0.7796	0.6845	0.7411	0.7555	0.5792	0.5909	0.6805	0.7555	-0.2193	-0.03303	-0.09041	0.127	0.1751	-0.1487	-0.3373	-0.188
3	0.9297	0.4901	0.6881	0.7242	0.7684	0.7137	0.8172	0.7754	0.8253	0.7918	0.7711	0.7502	0.7268	0.648	0.9108	0.9588	0.7248	0.7791	0.777	0.7237	0.03309	-0.1472	0.261	0.1153	0.21	0.2202	-0.08501	-0.1766
4	0.8748	0.8368	0.8637	0.8254	0.9866	0.7439	0.7001	0.8113	0.9497	0.7993	0.771	0.6538	0.8132	0.6911	0.8738	0.8614	0.8242	0.7763	0.8565	0.8367	0.02909	0.00196	0.005424	-0.01675	0.5318	-0.1274	-0.1561	0.127
5	0.9369	0.8737	0.7831	0.739	0.9237	0.8665	0.934	0.9673	0.8267	0.86	0.7407	0.9024	0.8568	0.817	0.9075	0.9065	0.8772	0.8945	0.7415	0.5712	-0.04276	0.02505	0.1967	-0.0789	0.2245	0.06695	-0.07959	0.08699
6	0.9637	0.7272	0.8537	0.9481	0.9539	0.9017	0.8181	0.8145	0.8031	0.8877	0.951	0.8276	0.8689	0.7804	0.9027	0.9024	0.7487	0.9065	0.8034	0.8354	-0.0547	0.06763	0.1929	-0.07747	0.3461	-0.1543	0.01235	0.02424
7	0.9643	0.8543	0.8874	0.7839	0.8838	0.9951	0.9273	0.9177	0.9762	0.946	0.8723	0.8298	0.8786	0.7832	0.9585	0.9143	1	0.7734	0.8435	0.9097	0.03295	-0.03479	0.03425	-0.311	0.2598	-0.02919	0.01569	-0.05686
8	0.9694	0.8871	0.9129	0.8368	0.9503	0.8686	0.9634	0.8517	0.8375	0.8661	0.7011	0.7907	0.7049	0.974	0.7496	0.7825	0.8463	0.9352	0.8444	0.8836	0.06363	-0.09478	-0.1533	-0.1207	0.106	-0.3005	0.02356	-0.1615
9	0.9527	0.991	0.9541	0.8079	0.9423	0.8968	0.9114	0.9018	0.836	0.9174	0.7975	0.8331	0.9404	0.9022	0.9121	0.8757	0.8232	0.8849	0.8908	0.8861	-0.07102	-0.1781	0.1545	-0.1303	0.3987	-0.02597	0.1077	0.1474
