# Supplementary material for: Neural circuit mechanisms for transforming learned olfactory valences into wind-oriented movement
Source: eLife. 2023 Sep 18;12:e85756. doi: 10.7554/eLife.85756 (PMC10588983; doi:10.7554/eLife.85756)
Supplement: Figure 1—source data 2. [file elife-85756-fig1-data2.xlsx]

## Sheet: Sheet1
	paired																				unpaired
0	0.05899	-0.05231	0.03983	0.00181	0.06751	-0.02725	0.00242	-0.0181	0.05072	-0.01216	0.0183	0.05523	0.07374	0.06965	-0.02146	-0.06426	-0.03279	-0.01164	-0.04093	0.00528	0.08424	0.04333	0.01013	-0.03137	0.09051	-0.01421	0.02658	-0.07705
1	0.04284	0.04024	0.00511	0.03838	0.01486	-0.00918	0.02794	0.02301	0.05584	0.02943	0.0048	-0.0205	0.00088	0.03814	6e-05	0.06493	0.02316	0.029	0.06949	0.00078	-0.06952	0.02263	-0.02743	-0.02397	-0.03157	0.05656	0.02456	0.07402
2	-6e-05	0.1203	0.1175	0.1145	0.09224	-0.00343	0.134	0.076	0.1125	0.03188	0.00506	0.09487	0.05536	0.07352	0.07961	0.1117	0.06066	0.08785	0.03626	0.07752	0.00971	-0.1301	0.01184	-0.02637	0.06225	0.00577	0.01989	0.02169
3	0.1896	0.1828	0.08377	0.1033	0.1462	0.06263	0.05885	0.07882	0.1334	0.01477	0.03553	0.1189	0.07524	0.09422	0.1382	0.2223	0.06767	0.06136	0.06882	0.05673	0.07873	-0.06619	-0.02078	-0.02077	0.0836	0.02884	0.06346	0.0412
4	0.1573	0.2717	0.08751	0.1946	0.1856	0.1677	0.09327	0.05256	0.2083	0.1176	0.1073	0.08588	0.05677	0.1414	0.1368	0.187	0.1082	0.1045	0.07436	0.09542	0.01349	-0.04762	-0.06769	-0.02978	-0.0119	0.08355	0.04487	0.07306
5	0.193	0.1682	0.2249	0.1749	0.2025	0.1206	0.1532	0.09906	0.1792	0.1944	0.1435	0.1896	0.1507	0.2362	0.1089	0.2226	0.229	0.1166	0.1826	0.09363	-0.03982	-0.0235	0.0058	-0.00129	0.06803	0.02928	0.03116	0.00919
6	0.2316	0.09402	0.2073	0.1879	0.3507	0.1333	0.3129	0.1436	0.2147	0.2668	0.1184	0.1784	0.2192	0.1632	0.2031	0.1639	0.2188	0.1542	0.1911	0.144	0.00152	-0.0134	-0.04645	0.06949	-0.03536	0.1641	0.1429	0.03311
7	0.2202	0.1918	0.1714	0.1635	0.3024	0.1597	0.212	0.1884	0.2037	0.2587	0.1874	0.1576	0.1835	0.2765	0.2726	0.2074	0.1238	0.2144	0.168	0.1895	-0.1715	-0.07789	0.02714	-0.01875	0.003	0.1085	0.04415	0.0364
8	0.3117	0.1853	0.2515	0.2826	0.3514	0.2056	0.3021	0.2086	0.1897	0.2669	0.1562	0.1311	0.1532	0.224	0.2077	0.1547	0.1572	0.2325	0.1452	0.1841	-0.00196	0.1381	0.05571	-0.06988	0.09281	-0.00394	0.01627	-0.0535
