# Supplementary material for: Neural circuit mechanisms for transforming learned olfactory valences into wind-oriented movement
Source: eLife. 2023 Sep 18;12:e85756. doi: 10.7554/eLife.85756 (PMC10588983; doi:10.7554/eLife.85756)
Supplement: Figure 1—source data 3. [file elife-85756-fig1-data3.xlsx]

## Sheet: Sheet1
PI	Upwind
0.686662	0.199196
0.602215	0.187106
0.761589	0.02376
0.887251	0.178458
0.70839	0.069095
0.66415	-0.04268
0.719366	0.129914
0.676694	0.106991
0.846596	0.259642
0.622487	0.136842
0.469609	0.022319
0.725638	-0.09532
0.566152	0.004092
0.194317	0.177342
0.794069	0.000279
0.680054	0.301909
0.232845	0.107688
0.660678	0.134843
0.625735	0.323112
0.447434	0.003627
