# Supplementary material for: Neural circuit mechanisms for transforming learned olfactory valences into wind-oriented movement
Source: eLife. 2023 Sep 18;12:e85756. doi: 10.7554/eLife.85756 (PMC10588983; doi:10.7554/eLife.85756)
Supplement: Figure 1—source data 4. [file elife-85756-fig1-data4.xlsx]

## Sheet: Sheet1
genotype	w;w,20xUAS-CsChrimson-mVenus; +/Empty-split-GA4	w;w,20xUAS-CsChrimson-mVenus; MB109B/MB315C	w;w,20xUAS-CsChrimson-mVenus; +/MB312C	w;w,20xUAS-CsChrimson-mVenus; +/MB213B	w;w,20xUAS-CsChrimson-mVenus; +/MB043C
#01	-0.01175	0.746253	0.548082	0.691377	0.711545
#02	0.146733	0.805187	0.181643	0.782476	0.729028
#03	0.147581	0.849011	0.341374	0.782029	0.739212
#04	0.093958	0.860836	0.523678	0.64231	0.787064
#05	0.02087	0.810514	0.502732	0.883048	0.840447
#06	0.024057	0.655751	-0.06004	0.90884	0.795396
#07	0.089849	0.836396	0.467932	0.641717	0.682953
#08	0.208916	0.774108	0.373104	0.81552	0.88601
#09	0.206272	0.72855	0.612469	0.337552	0.777192
#10	0.179094	0.752065	0.255552	0.535359	0.761181
#11	0.051366	0.862511	0.331332	0.468562	0.544151
#12	0.072479	0.926271	0.375488	0.656799	0.687406
#13	0.078382	0.90641	0.08785	0.538705	0.788807
#14	0.144379	0.568505	0.045505	0.722631	0.85211
#15	0.240934		0.502279	0.536703
#16	0.15244		0.49605	0.516904
#17	0.31977		0.536703
#18	0.227778		0.430226
#19	0.058784		0.702447
#20	-0.08593		0.498364
#21	-0.0496		0.470374
#22	0.274895		0.408376
