# Supplementary material for: Neural circuit mechanisms for transforming learned olfactory valences into wind-oriented movement
Source: eLife. 2023 Sep 18;12:e85756. doi: 10.7554/eLife.85756 (PMC10588983; doi:10.7554/eLife.85756)
Supplement: Figure 1—source data 5. [file elife-85756-fig1-data5.xlsx]

## Sheet: Sheet1
Genotype	w;w,20xUAS-CsChrimson-mVenus;MB109B/MB315C						w;w,20xUAS-CsChrimson-mVenus;+/MB312C						w;w,20xUAS-CsChrimson-mVenus;+/MB213B						w;w,20xUAS-CsChrimson-mVenus;+/MB043C						w;w,20xUAS-CsChrimson-mVenus;MB109B/MB315C						w;w,20xUAS-CsChrimson-mVenus;+/MB312C						w;w,20xUAS-CsChrimson-mVenus;+/MB213B						w;w,20xUAS-CsChrimson-mVenus;+/MB043C						w;w,20xUAS-CsChrimson-mVenus;MB109B/MB315C
Odor	PA						PA						PA						PA						EL						EL						EL						EL						PA
Data type	Delta distance from center						Delta distance from center						Delta distance from center						Delta distance from center						Delta distance from center						Delta distance from center						Delta distance from center						Delta distance from center						cos(upwind angle)
Protocol	CS+		NoLED		CS-		CS+		NoLED		CS-		CS+		NoLED		CS-		CS+		NoLED		CS-		CS+		NoLED		CS-		CS+		NoLED		CS-		CS+		NoLED		CS-		CS+		NoLED		CS-		CS+
Time	Mean	SEM	Mean	SEM	Mean	SEM	Mean	SEM	Mean	SEM	Mean	SEM	Mean	SEM	Mean	SEM	Mean	SEM	Mean	SEM	Mean	SEM	Mean	SEM	Mean	SEM	Mean	SEM	Mean	SEM	Mean	SEM	Mean	SEM	Mean	SEM	Mean	SEM	Mean	SEM	Mean	SEM	Mean	SEM	Mean	SEM	Mean	SEM	Mean
0.333333	0.0101	0.0116	-0.0138	0.0211	0.0158	0.0108	0.0022	0.0094	0.015	0.0116	0.0078	0.0104	-0.0203	0.0128	0.008	0.0112	0.0326	0.0123	-0.0083	0.0121	-0.0108	0.0073	-0.0073	0.0108	-0.0053	0.0082	0.0037	0.0245	2.62e-05	0.0119	-0.0191	0.0106	0.0017	0.0105	-0.001	0.0106	0.0003	0.0101	-0.004	0.0092	0.011	0.0124	-0.0018	0.0113	-0.0035	0.0069	0.006	0.0093	-0.067
0.666667	0.0114	0.0112	-0.0071	0.0207	0.0159	0.011	0.002	0.0094	0.0164	0.0114	0.0098	0.0107	-0.0183	0.0126	0.0135	0.011	0.0335	0.012	-0.0086	0.0121	-0.01	0.0073	-0.0074	0.0109	-0.0032	0.0079	0.0046	0.0245	0.001	0.0117	-0.0171	0.0104	0.0043	0.0101	0.0012	0.0105	0.0028	0.0104	-0.0021	0.009	0.0135	0.0121	0.0018	0.0115	-0.0038	0.0067	0.0054	0.0092	-0.0432
1	0.0108	0.0108	-0.0054	0.0197	0.0145	0.0108	0.0005	0.0093	0.0138	0.0112	0.0074	0.0105	-0.0191	0.0123	0.0141	0.0106	0.0313	0.012	-0.007	0.0116	-0.0099	0.0072	-0.0091	0.011	-0.0048	0.0077	0.0014	0.0235	-0.0009	0.0117	-0.0146	0.0101	0.0051	0.0099	0.0025	0.0099	0.003	0.0104	-0.0028	0.0089	0.0114	0.0116	0.0029	0.0115	-0.0049	0.0071	0.0027	0.0091	-0.0474
1.33333	0.0111	0.0103	-0.0035	0.0196	0.0132	0.0105	-0.0007	0.0091	0.0129	0.0114	0.0066	0.0104	-0.0189	0.0125	0.0148	0.0107	0.0289	0.0119	-0.0074	0.0112	-0.0095	0.007	-0.0083	0.0106	-0.0055	0.0075	-0.0017	0.0226	-0.0004	0.0112	-0.0142	0.0098	0.0075	0.0098	0.0038	0.0095	0.0026	0.0102	-0.0027	0.0089	0.0101	0.0114	0.0004	0.0115	-0.0065	0.007	0.0047	0.0092	-0.0255
1.66667	0.0092	0.0098	-0.0045	0.0194	0.0112	0.0102	-0.0028	0.009	0.0144	0.0114	0.0068	0.0104	-0.0185	0.0119	0.0158	0.0104	0.0264	0.0116	-0.0102	0.0114	-0.0088	0.0069	-0.0134	0.0112	-0.0049	0.0074	-0.0021	0.0217	-0.0009	0.0108	-0.012	0.0096	0.0079	0.0099	0.0022	0.0093	0.0017	0.0101	-0.003	0.0088	0.0079	0.012	-0.0013	0.0118	-0.0055	0.0067	0.0058	0.0092	-0.0235
2	0.0089	0.0098	-0.0009	0.0192	0.011	0.0101	-0.0037	0.0083	0.0156	0.0109	0.0057	0.0102	-0.0184	0.0114	0.0174	0.0101	0.0245	0.0113	-0.0068	0.0108	-0.0079	0.0068	-0.0173	0.0113	-0.0051	0.0077	-0.0016	0.0201	-0.0007	0.0105	-0.0094	0.0096	0.0083	0.01	0.0033	0.0089	0.0007	0.0101	-0.0023	0.0089	0.0085	0.0121	-0.0042	0.0123	-0.0052	0.0067	0.0088	0.009	-0.0275
2.33333	0.0106	0.0094	0.0023	0.0193	0.0137	0.0097	-0.0039	0.0081	0.0165	0.0101	0.0062	0.0103	-0.0197	0.0118	0.0172	0.0101	0.0234	0.0108	-0.0066	0.0105	-0.008	0.0069	-0.0166	0.0105	-0.0039	0.0081	-0.0006	0.0185	-0.0005	0.0105	-0.0084	0.0099	0.0073	0.01	0.0031	0.0088	-0.0023	0.0103	-0.0009	0.0091	0.0098	0.0115	-0.0047	0.0126	-0.0039	0.0065	0.0084	0.0088	-0.0355
2.66667	0.0115	0.0092	0.0046	0.0187	0.0133	0.0094	-0.0054	0.0079	0.0166	0.01	0.006	0.01	-0.0184	0.0126	0.018	0.0099	0.0215	0.0105	-0.0067	0.0099	-0.0086	0.007	-0.016	0.0099	-0.0041	0.008	0.0028	0.0181	-0.0017	0.0101	-0.0092	0.01	0.0052	0.0098	0.0029	0.0089	-0.0029	0.0103	-0.001	0.0093	0.0098	0.011	-0.0053	0.0125	-0.0035	0.0062	0.01	0.0085	-0.0297
3	0.0121	0.0089	0.0058	0.0176	0.0115	0.0094	-0.0068	0.0077	0.0159	0.0098	0.0073	0.0099	-0.0175	0.0122	0.0203	0.0096	0.0195	0.0102	-0.0038	0.0092	-0.0076	0.0068	-0.0151	0.0093	-0.004	0.0079	0.0051	0.0176	-0.0032	0.01	-0.0086	0.0098	0.0052	0.0097	0.0027	0.0091	-0.0026	0.0102	-0.0016	0.0093	0.0075	0.0108	-0.0081	0.0122	-0.0019	0.006	0.0094	0.0082	-0.0233
3.33333	0.011	0.0087	0.0045	0.016	0.0087	0.0096	-0.0063	0.0073	0.0161	0.0095	0.0071	0.0096	-0.0151	0.011	0.0205	0.0094	0.0161	0.01	-0.0023	0.0087	-0.0075	0.0069	-0.0154	0.0091	-0.0028	0.0079	0.0073	0.0173	-0.0027	0.0099	-0.0067	0.0094	0.0045	0.0098	0.0009	0.0092	-0.0012	0.0101	-0.0016	0.009	0.0079	0.0106	-0.0069	0.0117	-0.0021	0.0059	0.0099	0.008	-0.0217
3.66667	0.0094	0.0085	0.0123	0.0157	0.0065	0.0095	-0.0054	0.0074	0.0165	0.009	0.0067	0.009	-0.015	0.0106	0.0172	0.009	0.013	0.0098	-0.0027	0.0083	-0.0051	0.0067	-0.0188	0.009	-0.002	0.0076	0.0072	0.0167	0.0002	0.0097	-0.0061	0.0091	0.0027	0.0097	0.0004	0.0089	-0.0017	0.0097	-0.0015	0.0087	0.0062	0.0103	-0.0033	0.0113	-0.0037	0.006	0.0079	0.0079	-0.0281
4	0.0088	0.0083	0.0152	0.0143	0.0052	0.0093	-0.0055	0.0072	0.0159	0.0085	0.0057	0.0086	-0.0162	0.0106	0.0155	0.0088	0.0116	0.0095	-0.0012	0.0084	-0.0053	0.0067	-0.0169	0.0086	-0.0025	0.0075	0.009	0.017	0.0047	0.0097	-0.0057	0.0089	0.0048	0.0098	-0.0004	0.0087	-0.0027	0.0091	-0.0009	0.0083	0.0045	0.01	-0.0032	0.0113	-0.0015	0.0054	0.0088	0.0078	-0.043
4.33333	0.0061	0.0081	0.0191	0.0132	0.005	0.0093	-0.0055	0.0068	0.0149	0.0084	0.0058	0.0085	-0.0158	0.0106	0.0135	0.0084	0.0112	0.0092	-0.0017	0.0084	-0.0091	0.0069	-0.0155	0.0081	-0.0054	0.0072	0.0108	0.0168	0.0057	0.0095	-0.0052	0.0091	0.0046	0.0097	-0.0011	0.0088	-0.0034	0.0086	-0.0013	0.008	0.0022	0.0097	-0.0049	0.0108	-0.0028	0.0054	0.0126	0.0071	-0.036
4.66667	0.0053	0.0079	0.0245	0.0132	0.0044	0.0093	-0.002	0.0066	0.0144	0.0084	0.0038	0.0083	-0.0147	0.0104	0.0131	0.0081	0.0103	0.009	-0.0006	0.0082	-0.012	0.0066	-0.0133	0.0076	-0.0063	0.0071	0.0099	0.0162	0.0043	0.0092	-0.0045	0.0092	0.0029	0.0098	-0.0014	0.0088	-0.0039	0.0081	-0.0009	0.0081	-0.0006	0.0093	-0.005	0.0102	-0.0031	0.0053	0.011	0.0069	-0.0367
5	0.0051	0.0077	0.0255	0.0128	0.0041	0.0092	-0.0006	0.0064	0.0136	0.0083	0.0036	0.0078	-0.0158	0.0102	0.0139	0.008	0.0099	0.0089	0.0004	0.008	-0.0138	0.0066	-0.0154	0.0074	-0.0057	0.0067	0.0099	0.0159	0.0061	0.0087	-0.003	0.009	0.0011	0.0098	-0.0009	0.0083	-0.0023	0.0076	-0.0011	0.008	-0.0022	0.0089	-0.0069	0.0099	-0.004	0.0058	0.0116	0.0065	-0.0415
5.33333	0.0057	0.0073	0.0266	0.0133	0.0041	0.0088	-0.0003	0.006	0.0128	0.0081	0.0032	0.0076	-0.0156	0.0099	0.0132	0.0076	0.0099	0.0085	-0.0008	0.0078	-0.0131	0.0063	-0.0156	0.0066	-0.0047	0.0064	0.0096	0.016	0.0084	0.0085	-0.0025	0.0087	0.0003	0.0097	-0.0009	0.0079	-0.003	0.0073	-0.0027	0.0081	-0.002	0.0087	-0.0066	0.0098	-0.0015	0.0046	0.0117	0.0063	-0.0266
5.66667	0.0047	0.007	0.0235	0.0134		0.0084	0.0015	0.0058	0.0125	0.0083	0.0025	0.0073	-0.0155	0.0097	0.0114	0.0074	0.0108	0.0081	0.0014	0.0077	-0.0108	0.0057	-0.0122	0.0067	-0.0036	0.0061	0.0089	0.0154	0.0114	0.0088	-0.0017	0.0083	0.0003	0.0095	0.0009	0.0074	-0.0032	0.0067	-0.0049	0.0081	-0.001	0.0087	-0.0054	0.0092	-0.0029	0.0052	0.0103	0.0064	-0.0201
6	0.0037	0.0066	0.0236	0.0129	-0.0021	0.0083	0.0024	0.0052	0.0126	0.0085	0.0007	0.0071	-0.0141	0.0093	0.0093	0.0072	0.0088	0.0074	0.0029	0.0076	-0.0112	0.0054	-0.0128	0.0063	-0.0024	0.0058	0.007	0.0147	0.0148	0.009	-0.0019	0.0078	0.0001	0.009	0.0023	0.0071	-0.0025	0.0063	-0.0045	0.0077	-0.0048	0.0089	-0.0008	0.0087	0.0014	0.0042	0.0094	0.006	-0.006
6.33333	0.0042	0.0063	0.0225	0.0138	-0.0014	0.0077	0.0023	0.0053	0.0115	0.0083	-0.0008	0.0067	-0.0135	0.0086	0.0058	0.0072	0.0083	0.0067	0.0035	0.0072	-0.0099	0.0047	-0.0143	0.0065	-0.0021	0.0057	0.0057	0.0143	0.0157	0.0087	-0.0004	0.0072	0.0008	0.0084	0.0009	0.0068	-0.0044	0.006	-0.0058	0.0073	-0.0051	0.0091	-0.0015	0.0082	0.001	0.0043	0.0082	0.0062	0.008
6.66667	0.0044	0.006	0.0218	0.0139	-0.0016	0.0073	0.0022	0.0053	0.0106	0.008	-0.0021	0.006	-0.0115	0.008	0.0033	0.0068	0.0085	0.0061	0.0007	0.0073	-0.0103	0.0043	-0.011	0.0062	-0.0005	0.0057	0.0068	0.0137	0.0139	0.0082	0.0011	0.007	-0.0014	0.0078	0.0014	0.0063	-0.0053	0.0059	-0.0063	0.007	-0.0042	0.0088	-0.0013	0.0076	0.0009	0.0046	0.009	0.006	0.0073
7	0.0025	0.0059	0.0157	0.0113	-0.0027	0.007	0.0006	0.005	0.0026	0.0079	-0.0049	0.0056	-0.0115	0.0074	0.0006	0.0059	0.0063	0.0057	0.0005	0.0072	-0.0105	0.004	-0.0124	0.0066	-0.0017	0.0057	0.0066	0.0132	0.0095	0.0075	0.0002	0.0064	-0.0002	0.0071	0.0014	0.0054	-0.0043	0.0055	-0.0044	0.0066	-0.0038	0.0083	-0.0029	0.0081	0.0041	0.0036	0.0046	0.0073	0.0055
7.33333	0.0017	0.0057	0.0145	0.0107	-0.0026	0.0065	0.002	0.0046	0.0036	0.0068	-0.0044	0.0052	-0.0106	0.007	-0.0015	0.0055	0.0055	0.0052	0.0015	0.0068	-0.0116	0.0044	-0.0081	0.0056	-0.002	0.0054	0.0057	0.0115	0.0076	0.0067	-0.0008	0.0058	0.0008	0.0064	0.001	0.0048	-0.003	0.0053	-0.0035	0.006	-0.0018	0.0073	-0.0028	0.0075	0.0042	0.0035	0.0034	0.0075	0.0001
7.66667	0.0037	0.0052	0.0121	0.01	-0.0003	0.0058	0.0024	0.0046	0.0029	0.0059	-0.0048	0.0044	-0.0098	0.0065	-0.0028	0.0047	0.006	0.0047	-0.0006	0.0064	-0.009	0.0038	-0.0078	0.0056	-0.0014	0.0052	0.0073	0.0103	0.0057	0.0062	-0.0006	0.0055	0.0016	0.0058	0.002	0.0044	-0.0033	0.005	-0.0033	0.0056	0.0003	0.0068	-0.0028	0.0071	0.0045	0.0035	0.0054	0.0058	0.0072
8	0.0033	0.0049	0.0018	0.0088	0.001	0.0054	0.0015	0.0043	0.0031	0.0052	-0.0033	0.0038	-0.0087	0.0058	-0.0021	0.004	0.0062	0.004	0.0003	0.0056	-0.0059	0.0031	-0.0072	0.0053	-0.0011	0.0048	0.0079	0.0094	0.0036	0.0057	-0.0006	0.0051	0.0007	0.0051	0.003	0.004	-0.0052	0.0044	-0.0041	0.0055	-0.0014	0.0057	-0.0042	0.0064	0.0038	0.0033	0.0034	0.0054	-0.0071
8.33333	0.0019	0.0044	-0.0075	0.0087	0.0019	0.0046	0.0024	0.004	0.002	0.0043	-0.0026	0.0035	-0.0081	0.005	-0.0009	0.0035	0.0069	0.0036	0.0001	0.0064	-0.0035	0.0027	-0.0107	0.0056	-0.0015	0.0041	0.004	0.0083	0.0042	0.0052	-0.002	0.0046	0.0015	0.0044	0.0038	0.0035	-0.0052	0.0039	-0.0033	0.0049	-0.0033	0.0053	-0.0021	0.0053	-0.0005	0.0042	0.002	0.0052	-0.0195
8.66667	0.0007	0.0035	-0.008	0.0079	0.0006	0.0036	0.001	0.0031	0.0013	0.0036	-0.0025	0.0033	-0.0078	0.0042	-0.0011	0.0032	0.0063	0.0032	0.0002	0.0058	-0.0036	0.0024	-0.0086	0.0047		0.0034	0.0013	0.0065	0.0046	0.0045	-0.004	0.0038	0.0022	0.0036	0.004	0.0033	-0.0048	0.0032	-0.0033	0.0042	-0.004	0.0046	-0.0035	0.0048	-0.0016	0.0039	-0.001	0.0056	-0.0232
9	0.0008	0.0028	-0.0066	0.0063	-0.0006	0.0028	-0.0006	0.0024	0.0009	0.003	-0.0027	0.0032	-0.0069	0.0035	-0.0004	0.0031	0.0056	0.0026	0.0029	0.0045	-0.0034	0.0024	-0.0073	0.0041	0.0017	0.0028	-0.0006	0.0044	0.0031	0.0033	-0.0041	0.0028	0.003	0.0027	0.0041	0.0029	-0.0041	0.0025	-0.0021	0.0036	-0.0044	0.0036	-0.0011	0.0036	0.0017	0.002	0.0015	0.0039	-0.017
9.33333	0.0008	0.0024	-0.0046	0.0047	-0.0014	0.0022	-0.001	0.0016	0.0005	0.0027	-0.0012	0.0022	-0.005	0.0028	-0.0006	0.0024	0.003	0.0022	0.0025	0.0042	-0.0012	0.0019	-0.0039	0.003	0.0026	0.0022	0.0003	0.0035	0.0024	0.0023	-0.0041	0.002	0.0014	0.0022	0.0026	0.0023	-0.0025	0.0019	-0.0028	0.003	-0.0034	0.0026	-0.0011	0.0025	0.0017	0.0014	0.0015	0.0026	-0.0086
9.66667	0.0003	0.0014	-0.0008	0.003	-0.0007	0.0016	-0.0004	0.0009	0.0007	0.002	0.0002	0.0013	-0.0014	0.0013	-0.0012	0.0013	0.0011	0.0013	0.0018	0.0021	-0.001	0.0013	-0.0007	0.0019	0.0011	0.0013	0.0018	0.0022	0.0017	0.0013	-0.0024	0.0014	-0.0004	0.0012	0.0015	0.0013	-0.0006	0.0012	-0.0031	0.0019	-0.0014	0.0014	-0.0014	0.0019	0.0009	0.0008	5.09e-07	0.0015	0.0137
10	0	0	0	0	0	0	0	0	0	0	0	0	0	0	0	0	0	0	0	0	0	0	0	0	0	0	0	0	0	0	0	0	0	0	0	0	0	0	0	0	0	0	0	0	0	0	0	0	0.007
10.3333	-0.0026	0.0017	0.0009	0.0034	0.0022	0.0016	-0.0009	0.0018	-0.0013	0.0014	0.0013	0.0016	0.004	0.002	0.0023	0.0014	-0.0012	0.0013	-0.0023	0.0025	-0.004	0.0019	-0.0052	0.0038	0.0006	0.0011	-0.0023	0.0028	0.0014	0.0014	0.0014	0.0019	0.0029	0.0013	-0.0006	0.0015	0.0018	0.0015	0.0006	0.0012	0.0001	0.0014	-0.0017	0.003	-0.0008	0.0012	-0.0008	0.0023	-0.0128
10.6667	-0.0032	0.0023	0.0005	0.0044	0.0041	0.0028	-0.0016	0.0026	-0.0011	0.002	0.0017	0.0023	0.0045	0.0028	0.0014	0.0029	-0.0014	0.0021	-0.0008	0.0031	-0.0035	0.0022	-0.0024	0.0035	0.0029	0.0018	-0.0041	0.005	0.0025	0.0022	1.74e-05	0.0026	0.0041	0.0018	-0.0014	0.0021	0.002	0.0021	0.0022	0.0018	-0.0007	0.0026	0.0034	0.0022	-0.0002	0.0017	-0.0005	0.0039	-0.0101
11	-0.0014	0.0029	-0.0003	0.0058	0.0074	0.0041	-0.0019	0.0032	-0.0015	0.0029	0.0018	0.0029	0.0049	0.0035	0.0016	0.0037	-0.0025	0.003	-0.0006	0.0036	-0.0045	0.0027	-0.0038	0.004	0.0028	0.0025	-0.0055	0.0064	0.0017	0.0028	0.0009	0.0032	0.002	0.0026	-0.0019	0.0027	0.0011	0.0028	0.0016	0.0024	-0.0064	0.004	0.0043	0.003	-0.0002	0.0023	0.0023	0.0032	0.011
11.3333	-0.0001	0.0038	-0.0024	0.0064	0.01	0.0053	-0.0021	0.0038	-0.0016	0.0043	0.0032	0.0035	0.0049	0.0045	0.0029	0.0043	-0.0034	0.0038	-0.0015	0.0043	-0.0047	0.0032	-0.0013	0.0041	0.0031	0.0035	-0.0052	0.0071	0.0035	0.0036	0.0009	0.0036	-0.0024	0.0031	-0.0015	0.0034	-0.0012	0.0031	0.0018	0.003	-0.0094	0.0051	0.0057	0.0033	-0.0006	0.0028	0.0035	0.0036	0.0187
11.6667	0.0015	0.0045	0.0021	0.0074	0.0111	0.0062	-0.0025	0.0045	0.0003	0.0046	0.0027	0.0043	0.0044	0.0054	0.0051	0.0049	-0.0038	0.0046	-0.0042	0.0048	-0.0023	0.0033	0.0016	0.0046	0.0042	0.0044	-0.0048	0.0072	0.0048	0.0046	-0.0001	0.004	-0.0044	0.0036	-0.0011	0.0039	-0.0041	0.0037	0.001	0.0031	-0.0091	0.0059	0.0072	0.0031	-0.0015	0.0035	0.002	0.004	0.0413
12	0.0026	0.0052	0.0017	0.008	0.0142	0.007	-0.0034	0.0052	-0.0003	0.0049	0.0016	0.0051	0.0028	0.0062	0.0065	0.0055	-0.005	0.0049	-0.0053	0.0053	-0.0023	0.0036	0.0003	0.0051	0.006	0.005	-0.0011	0.0075	0.0067	0.0052	-0.0007	0.0044	-0.0052	0.0042	-0.0021	0.0043	-0.0046	0.0043	0.0008	0.0034	-0.0095	0.0065	0.0097	0.0037	-0.001	0.0035	0.0025	0.0051	0.0546
12.3333	0.0067	0.0056	0.0038	0.0085	0.0171	0.0073	-0.0021	0.0053	-0.0023	0.0055	0.0014	0.0055	0.002	0.0068	0.006	0.0056	-0.0039	0.0054	-0.0041	0.0054	-0.0023	0.0042	-0.0016	0.0065	0.0087	0.0057	0.0028	0.0079	0.0085	0.0057	0.0007	0.0049	-0.0083	0.0049	-0.0018	0.0048	-0.005	0.0049	0.0011	0.0039	-0.0071	0.007	0.0104	0.004	0.0017	0.0036	0.0069	0.0045	0.0894
12.6667	0.0098	0.0062	0.0056	0.0094	0.0203	0.0075	-0.0002	0.0054	-0.0038	0.0058	0.0006	0.0057	0.0009	0.0068	0.0061	0.0061	-0.0034	0.0058	-0.003	0.0062	-0.0005	0.0043	-0.0001	0.0067	0.0117	0.0064	0.0044	0.0086	0.0123	0.0059	0.0012	0.0054	-0.0106	0.0054	-0.0013	0.0052	-0.0042	0.005	0.0021	0.0041	-0.0054	0.0078	0.013	0.0049	0.0028	0.0036	0.0067	0.0049	0.11
13	0.0115	0.0071	0.0034	0.0103	0.0235	0.0079		0.0054	-0.0053	0.0061	0.0002	0.0061	0.0022	0.0072	0.0058	0.0065	-0.003	0.0061	-0.003	0.0068	0.0009	0.0047	0.0013	0.0068	0.0163	0.0069	0.0075	0.009	0.0158	0.0064	0.0032	0.0061	-0.011	0.0057	-0.0013	0.0057	-0.0022	0.0054	0.0049	0.0041	-0.0048	0.008	0.0208	0.0059	0.0066	0.004	0.0091	0.005	0.1401
13.3333	0.0124	0.0082	0.0033	0.0111	0.026	0.0084	0.0018	0.0056	-0.0054	0.0064	-0.0011	0.0065	0.005	0.0079	0.0074	0.0069	-0.0042	0.0064	0.0016	0.0074	0.0024	0.0046	0.0006	0.0075	0.0218	0.0072	0.0107	0.0088	0.0215	0.0068	0.0064	0.0066	-0.01	0.0063	0.0005	0.0064	0.0018	0.0059	0.0082	0.0044	-0.0039	0.008	0.0292	0.0064	0.0109	0.0045	0.0121	0.0054	0.1723
13.6667	0.0148	0.0089	0.0109	0.0124	0.0293	0.0088	0.0055	0.0063	-0.008	0.0068	-0.0016	0.0065	0.0037	0.0083	0.0069	0.007	-0.0037	0.0071	0.0071	0.0078	0.0013	0.0055	-0.0024	0.0079	0.0268	0.0074	0.0124	0.0095	0.0232	0.0074	0.0089	0.0079	-0.0069	0.0069	0.0034	0.0073	0.0073	0.0062	0.0137	0.0046	-0.0025	0.0081	0.0379	0.0072	0.0094	0.0062	0.0063	0.0073	0.1827
14	0.0208	0.0096	0.0117	0.0127	0.0301	0.0091	0.0104	0.0064	-0.0075	0.0068	-0.0001	0.0066	0.0077	0.0086	0.0079	0.0073	-0.0037	0.0074	0.0197	0.0082	0.0051	0.0062	-0.0013	0.0079	0.0337	0.0076	0.016	0.0098	0.0287	0.0082	0.0138	0.0082	-0.0022	0.0069	0.0068	0.0078	0.015	0.0065	0.0188	0.005	0.0008	0.0082	0.0542	0.0073	0.0148	0.0057	0.0102	0.0069	0.1864
14.3333	0.0238	0.0093	0.0107	0.0127	0.031	0.0092	0.015	0.0069	-0.0052	0.0069	0.001	0.0068	0.0145	0.0089	0.0087	0.0077	-0.0028	0.0076	0.0275	0.0089	0.0094	0.006	-0.0018	0.0083	0.0379	0.0076	0.0174	0.0107	0.032	0.0085	0.0215	0.0081	0.001	0.0069	0.0107	0.0079	0.0264	0.0068	0.0218	0.005	0.0049	0.0084	0.0702	0.0076	0.0178	0.0056	0.014	0.0067	0.1896
14.6667	0.0251	0.0094	0.0086	0.0132	0.0325	0.0092	0.0197	0.0074	-0.0041	0.007	0.0022	0.0069	0.0232	0.0091	0.0096	0.0081	-0.0031	0.0079	0.0427	0.0081	0.0109	0.0066	-0.0035	0.0086	0.0415	0.0077	0.019	0.0105	0.0355	0.0084	0.0282	0.0081	0.0051	0.007	0.0143	0.0082	0.0408	0.0073	0.0269	0.0052	0.0112	0.0086	0.0819	0.0076	0.0208	0.0064	0.0157	0.007	0.1954
15	0.0319	0.0091	0.0098	0.0135	0.0329	0.0091	0.026	0.0078	-0.0004	0.0069	0.0007	0.0073	0.0318	0.0093	0.0097	0.0082	-0.0045	0.0084	0.0582	0.0083	0.0122	0.0068	-0.006	0.009	0.0453	0.0077	0.0215	0.0101	0.0388	0.0086	0.0353	0.0081	0.0091	0.0071	0.0186	0.0083	0.0596	0.0079	0.0329	0.0055	0.0167	0.0086	0.0965	0.0079	0.0244	0.0059	0.0155	0.0077	0.1842
15.3333	0.0339	0.0095	0.0092	0.015	0.0327	0.0094	0.032	0.0085	0.0039	0.0071	-0.0006	0.0079	0.041	0.0095	0.0094	0.0084	-0.0047	0.0086	0.0726	0.0088	0.0137	0.0072	-0.0085	0.009	0.0494	0.0078	0.0266	0.0096	0.0391	0.0085	0.0455	0.0081	0.0144	0.0073	0.0231	0.0085	0.0812	0.0086	0.0365	0.0057	0.0195	0.0084	0.1123	0.0084	0.0268	0.0062	0.0156	0.0075	0.174
15.6667	0.0362	0.0097	0.0085	0.0157	0.033	0.0096	0.0366	0.009	0.0053	0.0077	-0.0005	0.008	0.0535	0.0096	0.0104	0.0084	-0.0048	0.0086	0.0886	0.0097	0.0169	0.007	-0.0107	0.0089	0.0519	0.008	0.032	0.0099	0.0416	0.0087	0.0566	0.0082	0.02	0.0073	0.0269	0.0089	0.1053	0.0095	0.042	0.0061	0.0244	0.0086	0.129	0.0092	0.0296	0.0061	0.0185	0.0076	0.1538
16	0.0375	0.0096	0.0051	0.0158	0.0323	0.0099	0.0415	0.0093	0.0067	0.0081	-0.0006	0.008	0.0665	0.01	0.0104	0.0086	-0.0062	0.0086	0.1041	0.0106	0.0171	0.0073	-0.013	0.0092	0.055	0.0082	0.036	0.0097	0.0438	0.0091	0.0666	0.0085	0.0257	0.0072	0.0293	0.0092	0.1268	0.0102	0.0489	0.0061	0.0296	0.0086	0.1383	0.0104	0.0342	0.0065	0.0181	0.0079	0.1554
16.3333	0.0433	0.0101	0.0007	0.0158	0.0345	0.0103	0.0458	0.0095	0.0097	0.0084	0.0008	0.0084	0.0792	0.0103	0.0113	0.0087	-0.0078	0.0088	0.1184	0.0114	0.0189	0.0071	-0.0134	0.0094	0.0579	0.0084	0.0417	0.0094	0.0446	0.0094	0.0773	0.0093	0.0322	0.0072	0.0334	0.0095	0.1458	0.0108	0.0554	0.0066	0.035	0.0088	0.1529	0.01	0.0389	0.0061	0.0221	0.0081	0.1555
16.6667	0.0472	0.0103	-0.0002	0.0157	0.0354	0.0107	0.0514	0.0098	0.0122	0.0087	0.0006	0.0088	0.0897	0.0104	0.0129	0.009	-0.0105	0.0089	0.1311	0.012	0.0228	0.0068	-0.0177	0.0097	0.0609	0.0085	0.0434	0.0097	0.0459	0.0099	0.0857	0.0097	0.0369	0.0075	0.0371	0.0098	0.1617	0.0117	0.0533	0.0068	0.0383	0.0089	0.1629	0.0107	0.0381	0.0063	0.0268	0.0091	0.1693
17	0.0436	0.0106	-0.0113	0.0145	0.0357	0.011	0.0549	0.0102	0.0133	0.009	-0.0002	0.0091	0.0975	0.0107	0.0125	0.0091	-0.0121	0.0087	0.1425	0.0133	0.0217	0.0064	-0.0214	0.0096	0.0631	0.0087	0.0446	0.0101	0.0466	0.0101	0.0913	0.0101	0.0434	0.0074	0.0365	0.0099	0.1753	0.0125	0.0572	0.0071	0.0438	0.009	0.1686	0.0119	0.0379	0.0061	0.0283	0.0093	0.1482
17.3333	0.0472	0.0107	-0.0154	0.0151	0.0355	0.0112	0.0572	0.0105	0.0146	0.0094	-0.0004	0.0091	0.1054	0.0108	0.0136	0.0091	-0.01	0.0088	0.1575	0.0143	0.0241	0.0071	-0.0226	0.01	0.0659	0.0089	0.0453	0.0098	0.0483	0.01	0.0986	0.0106	0.049	0.0079	0.0402	0.0102	0.1871	0.013	0.0591	0.0073	0.0482	0.0092	0.1809	0.0122	0.0414	0.006	0.0336	0.0086	0.1435
17.6667	0.0477	0.0107	-0.016	0.0154	0.0342	0.0113	0.0599	0.0107	0.0169	0.0098	-0.0001	0.009	0.1136	0.0111	0.0144	0.0094	-0.0093	0.0089	0.1631	0.0153	0.0229	0.0081	-0.0236	0.0105	0.0691	0.0091	0.0485	0.0096	0.049	0.0101	0.105	0.011	0.0535	0.0083	0.0446	0.0107	0.1992	0.0133	0.0632	0.0074	0.0517	0.0096	0.1884	0.0125	0.0452	0.0063	0.0339	0.009	0.1403
18	0.0516	0.0106	-0.0166	0.0152	0.0326	0.0116	0.0608	0.0109	0.0185	0.0102	0.0006	0.0092	0.1189	0.0118	0.0141	0.0096	-0.008	0.0091	0.1718	0.0157	0.0244	0.0074	-0.0213	0.0113	0.0722	0.0094	0.0508	0.0097	0.0491	0.0101	0.1098	0.0114	0.0581	0.0086	0.0464	0.0107	0.2101	0.0137	0.0669	0.0074	0.0539	0.0101	0.1965	0.0131	0.0472	0.0065	0.031	0.0099	0.1328
18.3333	0.0529	0.0107	-0.0156	0.0147	0.0293	0.0119	0.0618	0.0112	0.0196	0.0105	0.0024	0.0093	0.1232	0.0124	0.0142	0.01	-0.0082	0.0093	0.179	0.0157	0.0215	0.0089	-0.0222	0.0118	0.0757	0.0097	0.0512	0.0095	0.05	0.0101	0.1158	0.0114	0.0638	0.0089	0.0497	0.0108	0.2179	0.014	0.0692	0.0072	0.0567	0.0101	0.2024	0.0135	0.048	0.0068	0.0353	0.0095	0.1252
18.6667	0.0521	0.0109	-0.0131	0.0146	0.0282	0.0121	0.0618	0.0113	0.0207	0.0109	0.0046	0.0096	0.1271	0.0128	0.0141	0.0103	-0.0069	0.0092	0.1846	0.0164	0.0225	0.008	-0.0222	0.0118	0.0787	0.0099	0.051	0.0093	0.0496	0.0104	0.1215	0.0117	0.067	0.0091	0.0533	0.0113	0.2248	0.0141	0.0713	0.0075	0.0569	0.0103	0.2085	0.0143	0.0484	0.0068	0.0397	0.01	0.1431
19	0.0517	0.0115	-0.011	0.0139	0.0259	0.0119	0.0605	0.0116	0.0217	0.0111	0.0051	0.01	0.1319	0.0127	0.0128	0.0107	-0.007	0.0092	0.1852	0.0172	0.0218	0.0088	-0.0234	0.0117	0.0819	0.01	0.049	0.0096	0.0493	0.0109	0.1256	0.012	0.0697	0.0093	0.0563	0.0118	0.2306	0.0143	0.0706	0.008	0.0572	0.0105	0.2104	0.0147	0.0504	0.0072	0.0408	0.0101	0.1332
19.3333	0.0526	0.0119	-0.0116	0.0139	0.0222	0.0118	0.0631	0.0122	0.0239	0.0115	0.0051	0.0102	0.1354	0.0127	0.0125	0.0107	-0.0065	0.009	0.1918	0.0182	0.0259	0.0075	-0.022	0.0116	0.0841	0.0101	0.0476	0.0108	0.0486	0.0114	0.1299	0.0121	0.0735	0.0099	0.0578	0.0121	0.237	0.0144	0.0707	0.0082	0.0572	0.0103	0.2109	0.0165	0.0507	0.0074	0.0404	0.0103	0.1346
19.6667	0.0548	0.0121	-0.0113	0.0139	0.0213	0.0121	0.0648	0.012	0.0271	0.0122	0.0041	0.0106	0.1385	0.0129	0.0126	0.0113	-0.0065	0.009	0.1977	0.0187	0.0236	0.0079	-0.0225	0.0114	0.0863	0.0103	0.049	0.0118	0.0486	0.0117	0.1332	0.0123	0.0765	0.0105	0.06	0.0124	0.2411	0.0142	0.0712	0.0085	0.0607	0.0105	0.2134	0.0168	0.0501	0.0075	0.0391	0.0105	0.1355
20	0.0562	0.0125	-0.0093	0.0143	0.0219	0.0122	0.0633	0.0122	0.0311	0.0126	0.0033	0.0109	0.1403	0.0133	0.0144	0.0112	-0.0088	0.0091	0.2007	0.0184	0.0229	0.008	-0.0244	0.0115	0.0875	0.0103	0.0478	0.0122	0.0496	0.012	0.1356	0.0125	0.079	0.0112	0.0628	0.0128	0.2467	0.0144	0.0718	0.0087	0.0633	0.0101	0.2147	0.0164	0.0491	0.0074	0.0356	0.0104	0.1328
20.3333	0.0562	0.013	-0.0053	0.0161	0.02	0.0124	0.0653	0.0123	0.0312	0.0129	0.0022	0.0111	0.1408	0.0136	0.0159	0.0111	-0.0084	0.0091	0.2063	0.0187	0.0213	0.008	-0.0253	0.0122	0.0867	0.0102	0.0512	0.0129	0.0474	0.012	0.1363	0.0129	0.081	0.0118	0.0673	0.0136	0.2526	0.0144	0.0722	0.0086	0.0688	0.0102	0.2127	0.0169	0.0494	0.0076	0.0377	0.01	0.1101
20.6667	0.0551	0.0132	0.0018	0.0176	0.0193	0.0125	0.0651	0.0123	0.029	0.0133	0.0039	0.0113	0.1437	0.014	0.0129	0.0112	-0.0073	0.0094	0.2118	0.0187	0.022	0.0081	-0.0244	0.0123	0.0873	0.01	0.0513	0.0131	0.0432	0.0117	0.1388	0.0135	0.0825	0.012	0.0693	0.0139	0.2568	0.0147	0.0727	0.0085	0.0724	0.0106	0.2156	0.0173	0.0507	0.0077	0.0329	0.011	0.1009
21	0.0564	0.0138	0.0012	0.0196	0.0198	0.013	0.0661	0.0126	0.0271	0.0135	0.0057	0.0114	0.1467	0.0142	0.0123	0.0112	-0.009	0.0098	0.2112	0.0189	0.0228	0.0079	-0.0252	0.0125	0.0856	0.0099	0.0526	0.0137	0.0412	0.0117	0.1411	0.0139	0.084	0.0125	0.0713	0.0139	0.2613	0.0152	0.0736	0.0085	0.0748	0.011	0.2128	0.018	0.0507	0.0077	0.0321	0.0112	0.0977
21.3333	0.0572	0.0139	0.0019	0.02	0.0219	0.0133	0.0644	0.0124	0.028	0.0138	0.0085	0.0117	0.1482	0.0143	0.0125	0.0114	-0.0087	0.0102	0.2162	0.0186	0.0233	0.0079	-0.0272	0.0126	0.0849	0.0099	0.0528	0.0143	0.0389	0.0118	0.1418	0.0141	0.0857	0.0127	0.0732	0.0141	0.2663	0.0154	0.0731	0.0085	0.0733	0.0112	0.2147	0.0194	0.0506	0.0079	0.0295	0.0111	0.1009
21.6667	0.0592	0.0141	0.0016	0.0207	0.0257	0.0132	0.064	0.0125	0.0289	0.0143	0.0086	0.0119	0.1512	0.0147	0.0139	0.0115	-0.0094	0.01	0.2163	0.0187	0.0245	0.008	-0.0265	0.012	0.0856	0.0103	0.0511	0.0153	0.0367	0.0118	0.1425	0.0143	0.0864	0.0129	0.0739	0.014	0.2669	0.0152	0.0736	0.0083	0.0758	0.0119	0.2186	0.019	0.0505	0.008	0.0274	0.011	0.0961
22	0.0602	0.0145	0.002	0.0209	0.0294	0.0131	0.0663	0.0126	0.0297	0.0147	0.0092	0.0121	0.1503	0.0149	0.0141	0.0118	-0.0092	0.0104	0.2173	0.0188	0.0237	0.008	-0.0249	0.0122	0.0852	0.0102	0.0495	0.0166	0.035	0.0118	0.1432	0.0145	0.0849	0.013	0.074	0.0141	0.2683	0.0154	0.0736	0.0083	0.0764	0.0123	0.2161	0.0202	0.0518	0.008	0.0297	0.0113	0.0952
22.3333	0.0603	0.0142	0.0039	0.0211	0.0323	0.0132	0.0668	0.0128	0.031	0.0148	0.0076	0.0119	0.1506	0.0152	0.0162	0.0116	-0.0067	0.0106	0.2158	0.0196	0.0251	0.0086	-0.0254	0.0123	0.083	0.0102	0.0501	0.0173	0.0335	0.0119	0.1434	0.0146	0.0836	0.0132	0.0727	0.014	0.2706	0.016	0.0743	0.0086	0.079	0.0126	0.2207	0.0194	0.0512	0.0081	0.0291	0.0117	0.0861
22.6667	0.0599	0.0139	0.0069	0.0214	0.0342	0.0133	0.0673	0.0131	0.0326	0.0148	0.0061	0.0123	0.1503	0.016	0.0167	0.0116	-0.0069	0.0108	0.215	0.0204	0.0219	0.0085	-0.0258	0.0123	0.0779	0.0103	0.0513	0.0174	0.0295	0.012	0.1433	0.0145	0.0836	0.0134	0.0718	0.0141	0.2739	0.0163	0.0738	0.0086	0.0805	0.0131	0.2189	0.0193	0.0517	0.0083	0.0281	0.0119	0.0661
23	0.0569	0.0136	0.0117	0.0215	0.0351	0.0134	0.068	0.0132	0.0337	0.0148	0.0074	0.0124	0.1508	0.0165	0.0178	0.0118	-0.0051	0.0107	0.2152	0.0199	0.023	0.0083	-0.0272	0.0124	0.0722	0.0104	0.0531	0.0168	0.0269	0.0121	0.1424	0.0143	0.0799	0.0137	0.0727	0.0144	0.2721	0.0162	0.0751	0.0089	0.0804	0.0136	0.2193	0.0185	0.055	0.0084	0.0267	0.0119	0.0314
23.3333	0.0541	0.0133	0.0123	0.0214	0.0371	0.0133	0.0689	0.0139	0.035	0.0149	0.0077	0.0124	0.1476	0.0166	0.0168	0.0117	-0.0062	0.0109	0.2108	0.0204	0.022	0.0083	-0.0296	0.0126	0.0665	0.0105	0.0528	0.0167	0.0238	0.0119	0.1406	0.0144	0.0774	0.0139	0.0719	0.0146	0.2666	0.0158	0.078	0.0089	0.0804	0.0139	0.2066	0.019	0.0531	0.0086	0.0244	0.0118	0.0015
23.6667	0.0502	0.0125	0.0117	0.0216	0.0393	0.0133	0.0682	0.0139	0.0336	0.0145	0.0089	0.0123	0.1445	0.0171	0.017	0.0116	-0.0042	0.0115	0.2	0.0217	0.0202	0.0084	-0.037	0.0128	0.0621	0.0108	0.0541	0.017	0.0222	0.0121	0.1394	0.0141	0.0769	0.0137	0.0694	0.0148	0.2573	0.0154	0.0805	0.0089	0.0794	0.0143	0.2051	0.0178	0.0479	0.0091	0.0286	0.0115	-0.0393
24	0.0446	0.0126	0.0091	0.0219	0.0384	0.0134	0.0661	0.0138	0.0351	0.0148	0.0098	0.0123	0.1436	0.0169	0.0165	0.0117	-0.0029	0.0113	0.1971	0.021	0.019	0.0083	-0.039	0.0123	0.0579	0.0108	0.0519	0.0177	0.0208	0.0118	0.135	0.0139	0.0776	0.0137	0.0659	0.0146	0.25	0.015	0.0784	0.009	0.0786	0.014	0.1998	0.0173	0.0465	0.0093	0.0315	0.0118	-0.0624
24.3333	0.0384	0.0123	0.01	0.0226	0.0406	0.0134	0.064	0.0137	0.0333	0.0148	0.0108	0.0123	0.1435	0.0171	0.0167	0.0119	-0.0005	0.0112	0.1961	0.0204	0.0192	0.0083	-0.0347	0.0119	0.0521	0.0109	0.0493	0.0178	0.0179	0.0117	0.1303	0.0139	0.0776	0.0139	0.0637	0.0147	0.2431	0.0145	0.0764	0.0092	0.0773	0.0142	0.1952	0.0171	0.044	0.009	0.0304	0.0121	-0.0558
24.6667	0.0353	0.0123	0.0122	0.0235	0.043	0.0133	0.0609	0.0139	0.0327	0.0152	0.0128	0.0122	0.1406	0.0172	0.0154	0.0121	0.0016	0.0111	0.1906	0.0202	0.0167	0.0084	-0.0339	0.0117	0.045	0.0111	0.0457	0.0177	0.0158	0.0117	0.1278	0.014	0.0755	0.0141	0.0626	0.0145	0.2361	0.0142	0.0752	0.0094	0.0769	0.0142	0.1866	0.0169	0.0416	0.009	0.0271	0.0122	-0.06
25	0.0307	0.0123	0.0137	0.0233	0.0435	0.0132	0.0572	0.0142	0.0302	0.0152	0.013	0.0123	0.1356	0.0171	0.0155	0.0123	0.0033	0.0108	0.1828	0.0209	0.0175	0.0085	-0.0336	0.0118	0.0403	0.0115	0.0441	0.0178	0.0143	0.0117	0.1252	0.0143	0.0735	0.0139	0.0603	0.0141	0.2287	0.0143	0.0739	0.0094	0.0768	0.0143	0.1791	0.0168	0.0403	0.0089	0.0247	0.0125	-0.0636
25.3333	0.0239	0.0125	0.0106	0.0231	0.0446	0.0132	0.0557	0.0143	0.03	0.0148	0.0159	0.0125	0.1306	0.0173	0.0144	0.0129	0.0054	0.0109	0.1819	0.0203	0.0169	0.0083	-0.0354	0.0117	0.0332	0.012	0.0404	0.0187	0.0142	0.0118	0.1196	0.014	0.0722	0.0139	0.0585	0.0141	0.2212	0.0143	0.0725	0.0097	0.0785	0.0141	0.1749	0.0171	0.038	0.0088	0.021	0.0128	-0.0726
25.6667	0.0166	0.0129	0.0106	0.0227	0.0464	0.0132	0.0553	0.0143	0.0313	0.0148	0.0173	0.0127	0.1255	0.0177	0.0132	0.0132	0.0056	0.0113	0.175	0.0205	0.0177	0.0084	-0.0389	0.0122	0.0276	0.0122	0.0386	0.0192	0.0151	0.0121	0.1149	0.0139	0.0724	0.0139	0.0576	0.0138	0.2128	0.0139	0.0689	0.0099	0.0792	0.0142	0.1701	0.0175	0.0349	0.0091	0.0195	0.0131	-0.0875
26	0.0118	0.0135	0.0132	0.0227	0.047	0.0129	0.0534	0.0144	0.0324	0.0148	0.0194	0.0127	0.1185	0.0185	0.0139	0.0133	0.0046	0.0115	0.1703	0.0207	0.0153	0.0087	-0.0343	0.012	0.0236	0.0124	0.0353	0.0197	0.0143	0.0123	0.1108	0.0138	0.0718	0.0138	0.0563	0.0136	0.2045	0.0137	0.0683	0.0102	0.0761	0.0141	0.1618	0.0173	0.0331	0.0093	0.0192	0.0128	-0.0741
26.3333	0.0062	0.014	0.012	0.0223	0.0494	0.0128	0.0511	0.0146	0.0319	0.0149	0.02	0.0125	0.1117	0.019	0.0158	0.0134	0.0048	0.0118	0.1664	0.021	0.0123	0.0091	-0.0295	0.0115	0.0209	0.0124	0.0329	0.0198	0.0126	0.0121	0.1077	0.0141	0.0737	0.014	0.0558	0.0135	0.1969	0.0139	0.068	0.0101	0.0736	0.0144	0.1538	0.0179	0.0334	0.0093	0.0166	0.0128	-0.0644
26.6667	0.0004	0.0145	0.0131	0.0221	0.0499	0.0129	0.0498	0.0147	0.0307	0.015	0.0214	0.0124	0.1037	0.0187	0.0157	0.0136	0.0067	0.012	0.1615	0.0207	0.0143	0.0091	-0.0275	0.0113	0.0156	0.0124	0.032	0.0204	0.012	0.0122	0.1054	0.0142	0.0741	0.0143	0.0543	0.0134	0.1922	0.0143	0.0678	0.0105	0.0702	0.0143	0.1496	0.0183	0.0319	0.0095	0.0151	0.0127	-0.0662
27	-0.0037	0.0145	0.0139	0.022	0.0508	0.0131	0.0477	0.0143	0.0284	0.0149	0.0204	0.0123	0.0947	0.0185	0.0133	0.0141	0.0094	0.0123	0.1562	0.0206	0.0096	0.0095	-0.0271	0.012	0.012	0.0125	0.0333	0.0213	0.0116	0.0125	0.102	0.0141	0.0717	0.0146	0.0547	0.0138	0.1853	0.0144	0.0617	0.0105	0.0669	0.0144	0.1383	0.018	0.0313	0.0095	0.0175	0.0124	-0.0457
27.3333	-0.0079	0.0148	0.0123	0.0218	0.0503	0.0132	0.0455	0.0139	0.026	0.0146	0.0193	0.0121	0.0876	0.0188	0.014	0.0143	0.0116	0.0121	0.1502	0.0207	0.0105	0.0093	-0.022	0.0115	0.0086	0.0127	0.0309	0.0205	0.012	0.0126	0.0995	0.0143	0.0735	0.0145	0.0531	0.014	0.1811	0.0144	0.0603	0.0107	0.0637	0.0147	0.1329	0.0182	0.0299	0.0095	0.0189	0.0123	-0.0286
27.6667	-0.0115	0.0151	0.0115	0.0219	0.049	0.0132	0.0437	0.0141	0.0249	0.0147	0.0199	0.0122	0.0809	0.0193	0.0111	0.0146	0.0135	0.0122	0.144	0.021	0.0102	0.0094	-0.0184	0.0113	0.0047	0.0131	0.0298	0.0204	0.0142	0.0128	0.0987	0.0143	0.0741	0.0146	0.0508	0.0142	0.1801	0.0148	0.0585	0.0108	0.0617	0.015	0.1377	0.017	0.0279	0.0096	0.0195	0.0123	-0.0176
28	-0.0134	0.0155	0.0113	0.0215	0.0489	0.0134	0.0397	0.0141	0.0236	0.0144	0.0198	0.0125	0.0762	0.0196	0.0103	0.0144	0.0181	0.0123	0.1352	0.0208	0.0088	0.009	-0.0135	0.0113	0.0006	0.0132	0.0273	0.0223	0.0155	0.0128	0.0964	0.0144	0.0724	0.0147	0.0495	0.0142	0.1759	0.0149	0.0573	0.0107	0.0593	0.0147	0.1357	0.0166	0.0249	0.0098	0.0176	0.0119	-0.011
28.3333	-0.0164	0.0156	0.0115	0.0215	0.0487	0.0135	0.0393	0.0144	0.0228	0.0146	0.0204	0.0124	0.0705	0.0196	0.0092	0.0144	0.0212	0.0125	0.1296	0.0207	0.0091	0.0088	-0.0103	0.0113	-0.0026	0.0133	0.0263	0.0226	0.0158	0.0125	0.0953	0.0146	0.0688	0.0147	0.0493	0.0138	0.1737	0.0153	0.0553	0.0109	0.0575	0.015	0.135	0.017	0.0235	0.0101	0.0155	0.0122	-0.0286
28.6667	-0.0209	0.0156	0.014	0.0218	0.0475	0.0137	0.0374	0.0144	0.0222	0.0144	0.0211	0.0122	0.0652	0.0196	0.0078	0.0145	0.0225	0.0127	0.1244	0.021	0.0074	0.0092	-0.0076	0.011	-0.0042	0.0134	0.0293	0.0226	0.0154	0.0126	0.0938	0.0148	0.067	0.0148	0.0464	0.014	0.1701	0.0154	0.0544	0.0107	0.055	0.0154	0.1282	0.0167	0.0239	0.0096	0.0205	0.0118	-0.0309
29	-0.0234	0.0159	0.0175	0.0222	0.0478	0.0137	0.0376	0.0143	0.0205	0.0148	0.0223	0.012	0.0615	0.0198	0.0057	0.0144	0.0235	0.0129	0.1219	0.0204	0.0065	0.0094	-0.0036	0.011	-0.0043	0.0136	0.0301	0.0229	0.0143	0.013	0.093	0.0147	0.0653	0.0149	0.0455	0.0139	0.1654	0.0158	0.0533	0.011	0.0508	0.0153	0.1227	0.0178	0.0242	0.0093	0.0223	0.0123	-0.014
29.3333	-0.0231	0.016	0.0203	0.0227	0.0496	0.0135	0.0353	0.0144	0.0169	0.015	0.0214	0.0122	0.061	0.0193	0.0041	0.0144	0.0255	0.0132	0.1191	0.0208	0.0059	0.0094	2.93e-06	0.0116	-0.005	0.0136	0.0295	0.0237	0.0144	0.0131	0.0913	0.0147	0.062	0.0151	0.0436	0.0143	0.1592	0.0159	0.054	0.0112	0.0493	0.0149	0.1312	0.0177	0.0236	0.0092	0.0217	0.0128	-0.0044
29.6667	-0.0236	0.0161	0.0177	0.023	0.0507	0.0135	0.0332	0.0144	0.0149	0.0149	0.0207	0.0123	0.0586	0.0191	0.0012	0.0145	0.0279	0.0131	0.12	0.0205	0.0046	0.0096	0.0004	0.0117	-0.0059	0.0135	0.0289	0.0249	0.0143	0.0134	0.088	0.0147	0.0633	0.015	0.0417	0.0143	0.1547	0.0161	0.0546	0.0114	0.0459	0.0148	0.1303	0.0181	0.0218	0.0091	0.0185	0.0134	0.0178
30	-0.0242	0.0164	0.017	0.0239	0.0528	0.0134	0.0306	0.0143	0.0149	0.0146	0.0173	0.0123	0.0581	0.019	-0.0005	0.0143	0.0288	0.0129	0.1179	0.0205	0.0047	0.0096	0.0015	0.0119	-0.0097	0.0134	0.0251	0.0256	0.014	0.0133	0.0851	0.0148	0.0621	0.0152	0.0401	0.0139	0.1507	0.0164	0.0534	0.0117	0.0444	0.0146	0.1242	0.0181	0.0193	0.0091	0.0174	0.013	0.0446
30.3333	-0.0228	0.0166	0.0168	0.0244	0.0529	0.0134	0.0286	0.0144	0.0145	0.0141	0.0139	0.0125	0.0578	0.0191	-0.0015	0.0145	0.0273	0.0126	0.1119	0.0203	0.0013	0.0096	-0.0028	0.0132	-0.0139	0.0134	0.0271	0.0259	0.0126	0.0133	0.0824	0.015	0.0638	0.0152	0.0384	0.0145	0.1425	0.0168	0.053	0.0121	0.0401	0.0144	0.1122	0.0196	0.0174	0.009	0.0171	0.0134	0.031
30.6667	-0.0245	0.0172	0.0149	0.0243	0.051	0.0136	0.0279	0.0147	0.0098	0.0148	0.0123	0.0124	0.0573	0.0191	-0.0024	0.0148	0.0305	0.0124	0.1073	0.0199	0.0004	0.0098	0.003	0.0131	-0.0165	0.0133	0.0296	0.0261	0.0115	0.0132	0.0807	0.015	0.0659	0.0148	0.037	0.0151	0.139	0.0168	0.0499	0.0124	0.0378	0.0143	0.1193	0.0174	0.0159	0.009	0.0212	0.0123	0.0146
31	-0.0245	0.0174	0.0143	0.0237	0.0499	0.0134	0.0289	0.0149	0.0085	0.0143	0.0101	0.0125	0.0546	0.0196	-0.005	0.0149	0.0323	0.0126	0.1027	0.0197	-0.0006	0.0097	-0.0001	0.0126	-0.019	0.0131	0.0243	0.0268	0.012	0.0132	0.0801	0.0153	0.0653	0.0143	0.0362	0.0154	0.137	0.0168	0.0483	0.0122	0.0359	0.0144	0.1118	0.0184	0.016	0.009	0.0243	0.0123	0.0348
31.3333	-0.0249	0.0178	0.0125	0.0234	0.0478	0.0134	0.03	0.0148	0.0086	0.014	0.009	0.0124	0.0528	0.0199	-0.0066	0.015	0.0349	0.0124	0.0968	0.0194	-0.0014	0.0096	0.0002	0.0126	-0.0205	0.0134	0.0234	0.0267	0.0129	0.0134	0.0785	0.015	0.0647	0.0142	0.0334	0.0159	0.1351	0.017	0.0484	0.012	0.0358	0.0142	0.1113	0.0174	0.0143	0.009	0.0227	0.0125	0.0439
31.6667	-0.0245	0.0185	0.0121	0.0224	0.0463	0.0135	0.0299	0.0149	0.0088	0.0138	0.0084	0.0124	0.0516	0.0205	-0.0056	0.0149	0.0348	0.0124	0.0954	0.0189	-0.0012	0.0096	0.0025	0.013	-0.0218	0.0141	0.0219	0.0265	0.0117	0.0136	0.0784	0.0151	0.0626	0.0137	0.0317	0.016	0.1321	0.0172	0.0475	0.0119	0.0361	0.014	0.1059	0.0174	0.0143	0.0091	0.0221	0.0129	0.0495
32	-0.026	0.019	0.0098	0.0221	0.0456	0.0139	0.0299	0.0146	0.0096	0.0137	0.0041	0.0125	0.0509	0.0207	-0.0048	0.0149	0.0357	0.0126	0.0935	0.0186	-0.0026	0.0099	-0.0005	0.0127	-0.0229	0.0146	0.0215	0.0265	0.0093	0.0136	0.0808	0.0152	0.0611	0.0134	0.0307	0.0162	0.13	0.0174	0.049	0.0119	0.0357	0.014	0.1064	0.0176	0.0129	0.0093	0.0232	0.0128	0.0566
32.3333	-0.0257	0.0193	0.0055	0.0219	0.0435	0.0141	0.0299	0.0147	0.0097	0.0138	0.0024	0.0126	0.0507	0.0207	-0.0069	0.0151	0.036	0.0124	0.0897	0.0186	-0.003	0.0102	0.0037	0.0126	-0.0237	0.0146	0.0207	0.0265	0.008	0.0135	0.0789	0.0151	0.0609	0.0132	0.0319	0.016	0.1291	0.0174	0.048	0.012	0.0372	0.0145	0.1055	0.0169	0.0132	0.0094	0.0215	0.0129	0.0494
32.6667	-0.0272	0.0194	-0.0003	0.0222	0.0404	0.0142	0.0294	0.0144	0.0095	0.014	-0.0004	0.0129	0.0484	0.0207	-0.0097	0.0153	0.0367	0.0127	0.087	0.0188	-0.0043	0.0102	0.0061	0.0123	-0.0233	0.0144	0.0242	0.0263	0.0067	0.0136	0.0778	0.0148	0.0605	0.0128	0.0292	0.0161	0.1288	0.0173	0.0462	0.0122	0.0369	0.0142	0.1063	0.0164	0.0143	0.0093	0.0193	0.0126	0.0423
33	-0.0267	0.0192	-0.0099	0.0217	0.0381	0.0144	0.0287	0.0144	0.0105	0.0142	-0.0044	0.0129	0.0439	0.0205	-0.0107	0.0153	0.0375	0.0125	0.0829	0.0189	-0.0057	0.0102	0.0099	0.0118	-0.0209	0.0143	0.0266	0.0258	0.0066	0.0138	0.077	0.0145	0.0597	0.0127	0.0274	0.016	0.1276	0.017	0.0437	0.0123	0.0362	0.0147	0.1076	0.0162	0.0146	0.009	0.0207	0.0125	0.0552
33.3333	-0.0271	0.0189	-0.0139	0.0226	0.0369	0.0146	0.0281	0.0144	0.0121	0.0144	-0.0053	0.0127	0.0405	0.0204	-0.0117	0.0152	0.0365	0.0125	0.0795	0.0193	-0.007	0.0103	0.0125	0.0124	-0.0191	0.0143	0.0272	0.0257	0.0029	0.014	0.0762	0.0142	0.0592	0.0127	0.0261	0.0159	0.1279	0.0169	0.0416	0.0125	0.0367	0.0149	0.1087	0.0162	0.0151	0.0091	0.0199	0.0126	0.0429
33.6667	-0.0274	0.019	-0.0165	0.0232	0.0369	0.0148	0.0259	0.0144	0.0113	0.0144	-0.0049	0.0127	0.04	0.0201	-0.0129	0.0151	0.037	0.0124	0.0731	0.0203	-0.0077	0.0105	0.0114	0.0131	-0.0178	0.014	0.031	0.0253	-0.0005	0.0139	0.0762	0.0143	0.0568	0.0131	0.0234	0.0159	0.1263	0.0168	0.0418	0.012	0.0348	0.0147	0.1036	0.017	0.0138	0.009	0.0128	0.0126	0.0412
34	-0.0249	0.0192	-0.0188	0.023	0.0357	0.0147	0.023	0.0147	0.0136	0.0144	-0.0051	0.0126	0.039	0.02	-0.0154	0.0153	0.0363	0.0124	0.0686	0.0204	-0.0073	0.0108	0.0141	0.0129	-0.0184	0.0138	0.0347	0.0256	0.0007	0.0139	0.0752	0.0142	0.0557	0.0131	0.0211	0.0159	0.1228	0.0166	0.0403	0.0116	0.0336	0.0147	0.1076	0.0171	0.0152	0.0093	0.013	0.0127	0.0363
34.3333	-0.0277	0.0188	-0.0173	0.023	0.0348	0.0146	0.0226	0.0148	0.0145	0.0145	-0.0047	0.0127	0.0363	0.0199	-0.0141	0.0154	0.036	0.0122	0.0664	0.021	-0.0072	0.0109	0.0168	0.0128	-0.0199	0.0137	0.0371	0.0267	0.0012	0.0141	0.0737	0.014	0.0534	0.0132	0.0205	0.0159	0.1214	0.0163	0.0379	0.0116	0.0323	0.0147	0.1088	0.0173	0.0152	0.0096	0.0123	0.0129	0.0161
34.6667	-0.0286	0.0184	-0.0165	0.0225	0.0343	0.0145	0.0218	0.0147	0.0136	0.0147	-0.0048	0.013	0.0344	0.0196	-0.013	0.0152	0.0351	0.0121	0.0629	0.0201	-0.0073	0.0109	0.0163	0.013	-0.0196	0.0136	0.0356	0.0266	0.0013	0.0143	0.074	0.014	0.0532	0.0133	0.0199	0.0156	0.1213	0.0163	0.0374	0.0114	0.0312	0.0149	0.1047	0.0173	0.014	0.0097	0.0116	0.0136	0.0175
35	-0.0267	0.0184	-0.0133	0.0222	0.034	0.0144	0.0197	0.0148	0.0123	0.0149	-0.0044	0.0128	0.0295	0.0196	-0.0129	0.0151	0.0329	0.0121	0.0578	0.0207	-0.0087	0.0109	0.0176	0.0134	-0.0207	0.0135	0.0334	0.0262	0.0015	0.0143	0.075	0.0142	0.0552	0.0136	0.0215	0.0152	0.1212	0.0166	0.0366	0.0113	0.0276	0.0148	0.106	0.0177	0.0146	0.0097	0.0108	0.0132	0.0469
35.3333	-0.0241	0.0179	-0.0142	0.0223	0.0326	0.0141	0.0177	0.0149	0.0128	0.0155	-0.0054	0.0125	0.0257	0.0195	-0.0132	0.0149	0.0309	0.0123	0.0552	0.0206	-0.0097	0.0108	0.0167	0.0132	-0.0208	0.0135	0.0285	0.0268	0.0025	0.0144	0.0743	0.0143	0.0551	0.014	0.0229	0.0152	0.1195	0.0168	0.0348	0.0112	0.0243	0.0148	0.104	0.0173	0.0126	0.0097	0.0093	0.0131	0.0708
35.6667	-0.0201	0.017	-0.0135	0.0226	0.0318	0.0141	0.0178	0.0148	0.0145	0.0158	-0.0053	0.0125	0.0237	0.0193	-0.0113	0.0152	0.0286	0.0126	0.0538	0.0204	-0.0081	0.0107	0.0152	0.0136	-0.0217	0.0134	0.0261	0.0275	0.0032	0.0146	0.0736	0.0142	0.0565	0.0142	0.0236	0.0152	0.1166	0.017	0.0344	0.0109	0.0219	0.0152	0.1048	0.0175	0.0116	0.0099	0.0091	0.0128	0.069
36	-0.0192	0.0167	-0.0093	0.0231	0.0305	0.0141	0.0163	0.0145	0.0135	0.0159	-0.0055	0.0124	0.0227	0.0192	-0.0126	0.0151	0.0278	0.0128	0.0505	0.0202	-0.0082	0.0107	0.0198	0.0134	-0.0215	0.0132	0.0253	0.0277	0.0051	0.0145	0.0739	0.0141	0.0566	0.0147	0.0237	0.0152	0.1135	0.0169	0.0343	0.0108	0.02	0.0153	0.1007	0.0177	0.0109	0.0101	0.0072	0.013	0.0475
36.3333	-0.0171	0.017	-0.0087	0.0235	0.0291	0.0143	0.0151	0.0142	0.0118	0.0163	-0.0059	0.0124	0.0213	0.0193	-0.0116	0.0149	0.03	0.0128	0.0479	0.0198	-0.0082	0.0105	0.0217	0.0138	-0.0207	0.0134	0.0223	0.028	0.004	0.0143	0.0729	0.0142	0.0558	0.0149	0.025	0.0149	0.1099	0.0168	0.0319	0.0107	0.0191	0.0153	0.0972	0.0181	0.0099	0.01	0.0076	0.013	0.0506
36.6667	-0.0165	0.0172	-0.0109	0.0229	0.0275	0.0144	0.013	0.0141	0.0087	0.0164	-0.0071	0.0126	0.0185	0.0199	-0.0107	0.0149	0.031	0.0129	0.0437	0.0198	-0.0087	0.0103	0.0209	0.0139	-0.0218	0.0134	0.0227	0.0283	0.0024	0.0137	0.0703	0.0142	0.0564	0.0146	0.0243	0.0149	0.1058	0.0169	0.0258	0.0104	0.0169	0.016	0.097	0.0183	0.0107	0.0096	0.0079	0.0133	0.0528
37	-0.015	0.017	-0.0105	0.023	0.0251	0.0144	0.01	0.0139	0.0068	0.0166	-0.0099	0.0127	0.0197	0.0204	-0.0104	0.0152	0.0312	0.0132	0.0418	0.0205	-0.0096	0.0104	0.017	0.0135	-0.0203	0.0137	0.0259	0.0283	0.001	0.0136	0.0696	0.0143	0.0545	0.0146	0.0276	0.0149	0.1016	0.0169	0.0244	0.0105	0.015	0.0158	0.0936	0.0185	0.0054	0.0096	0.0027	0.0131	0.0415
37.3333	-0.0139	0.0171	-0.008	0.0229	0.0229	0.0145	0.0096	0.0137	0.0054	0.0165	-0.0122	0.0129	0.0206	0.0206	-0.0074	0.0156	0.0291	0.0133	0.0417	0.0206	-0.0089	0.0103	0.0191	0.014	-0.0165	0.0144	0.0292	0.0281	0.001	0.0138	0.0696	0.0143	0.0548	0.0145	0.0294	0.0148	0.0968	0.0169	0.0224	0.0108	0.015	0.0159	0.0939	0.019	0.0056	0.0094	0.0029	0.0131	0.0409
37.6667	-0.0136	0.0168	-0.0045	0.0225	0.0217	0.0147	0.0094	0.0134	0.0036	0.0167	-0.0133	0.0132	0.0229	0.0207	-0.0044	0.016	0.028	0.0132	0.0392	0.0207	-0.0108	0.0102	0.0196	0.0138	-0.0169	0.015	0.0336	0.0276	0.0006	0.014	0.07	0.0141	0.0533	0.0146	0.0297	0.0146	0.0957	0.0171	0.0223	0.0108	0.0152	0.0163	0.0945	0.0192	0.0039	0.0092	0.0022	0.0133	0.0354
38	-0.0138	0.0168	-0.0012	0.0225	0.0228	0.0147	0.0103	0.0135	0.003	0.0164	-0.0135	0.0134	0.0252	0.0204	-0.0043	0.0163	0.0269	0.0131	0.0372	0.0202	-0.0116	0.0101	0.0179	0.0139	-0.0156	0.0153	0.0355	0.027	-0.0019	0.0139	0.071	0.014	0.051	0.0148	0.0285	0.0143	0.0957	0.0172	0.0198	0.011	0.0148	0.0166	0.0917	0.0194	0.0026	0.0097	0.0023	0.014	0.0422
38.3333	-0.0136	0.0163	-0.0019	0.0223	0.0222	0.0148	0.0101	0.0134	0.0024	0.0165	-0.0148	0.0136	0.0273	0.0205	-0.0011	0.016	0.0254	0.0132	0.0362	0.0203	-0.0119	0.0101	0.0152	0.0139	-0.0155	0.0159	0.0399	0.0267	-0.0018	0.0139	0.0735	0.014	0.0503	0.0148	0.0292	0.0139	0.0944	0.0171	0.0171	0.0112	0.0117	0.0166	0.0927	0.0198	0.0036	0.0097	0.0027	0.0142	0.0449
38.6667	-0.0136	0.016	-0.0045	0.0222	0.0216	0.0151	0.0094	0.0131	0.003	0.0162	-0.014	0.0136	0.0308	0.0206	-0.0018	0.0162	0.0268	0.0131	0.0328	0.0204	-0.0122	0.0101	0.0159	0.0137	-0.0164	0.0162	0.044	0.0262	-0.002	0.0138	0.0753	0.0141	0.0507	0.0152	0.03	0.0136	0.0932	0.017	0.0164	0.0113	0.0097	0.0167	0.0909	0.0197	0.0055	0.0093	0.0059	0.0143	0.0405
39	-0.0149	0.016	-0.0029	0.0221	0.0217	0.0152	0.0121	0.0131	0.0035	0.016	-0.0118	0.0136	0.0335	0.0203	-0.0012	0.0164	0.0275	0.0129	0.0302	0.0208	-0.0123	0.0099	0.0158	0.0137	-0.0168	0.0161	0.0452	0.0259	-0.0014	0.0141	0.0765	0.0141	0.0512	0.0154	0.0288	0.0135	0.0933	0.017	0.0167	0.0114	0.0068	0.0164	0.0916	0.0199	0.0047	0.0093	0.0053	0.0144	0.0528
39.3333	-0.0154	0.0161	0.0003	0.0223	0.0214	0.0151	0.012	0.0133	0.0044	0.0156	-0.01	0.0138	0.0354	0.0201	-0.0016	0.0164	0.0283	0.0127	0.0291	0.0209	-0.0116	0.0098	0.0162	0.0139	-0.0172	0.0161	0.044	0.0256	-0.0011	0.0139	0.0788	0.014	0.0521	0.0152	0.0267	0.0136	0.0916	0.0169	0.0142	0.0112	0.0055	0.0163	0.0902	0.0202	0.0039	0.0093	0.0044	0.0145	0.0388
39.6667	-0.0148	0.0159	0.0022	0.0226	0.0211	0.0151	0.0117	0.0134	0.0041	0.0155	-0.0095	0.0139	0.0328	0.0208	-0.0011	0.0163	0.0286	0.0128	0.0272	0.0208	-0.0107	0.0097	0.0151	0.014	-0.0187	0.016	0.0432	0.026	-0.0014	0.014	0.0807	0.0141	0.051	0.015	0.0256	0.0139	0.0899	0.0167	0.0105	0.0119	0.0045	0.0162	0.0908	0.0199	0.0044	0.0094	0.0028	0.0145	0.0108
40	-0.0132	0.0159	0.0032	0.0222	0.0209	0.0151	0.0131	0.0134	0.0028	0.0154	-0.0093	0.014	0.0323	0.0211	-0.0015	0.0162	0.0279	0.0126	0.0232	0.0204	-0.0101	0.0097	0.015	0.014	-0.0188	0.0159	0.0404	0.0254	-0.0025	0.0143	0.0808	0.0141	0.0474	0.0151	0.0258	0.0143	0.0895	0.0166	0.0102	0.012	0.0043	0.0159	0.0892	0.0203	0.0038	0.0095	0.0009	0.0144	0.0154
40.3333	-0.0118	0.0163	0.0025	0.0219	0.0207	0.0154	0.0141	0.0131	0.0007	0.0155	-0.0102	0.0143	0.0334	0.0208	-0.0028	0.0161	0.0292	0.0125	0.0206	0.02	-0.0098	0.0096	0.0104	0.0141	-0.0215	0.016	0.0408	0.0245	-0.0045	0.0142	0.0784	0.0143	0.0469	0.0149	0.0238	0.0146	0.091	0.0166	0.0131	0.0117	0.0032	0.0158	0.0825	0.0204	-0.0014	0.009	-0.0049	0.014	0.0341
40.6667	-0.0113	0.0162	0.001	0.0215	0.0199	0.0153	0.0162	0.0132	-0.002	0.0153	-0.0116	0.0143	0.0344	0.021	-0.0059	0.0163	0.0304	0.0124	0.0209	0.0201	-0.0104	0.0093	0.0113	0.0144	-0.0201	0.0157	0.0424	0.0239	-0.005	0.0142	0.0768	0.0147	0.0458	0.0148	0.0244	0.0146	0.0913	0.0166	0.0146	0.0118	0.0013	0.0157	0.0793	0.0199	0.0004	0.0094	-0.0055	0.0139	0.0233
41	-0.0092	0.0162	0.0017	0.0217	0.0194	0.0152	0.0164	0.0131	-0.004	0.0151	-0.0137	0.0145	0.0356	0.0209	-0.0081	0.0163	0.0281	0.0121	0.0243	0.02	-0.0102	0.0093	0.0136	0.0141	-0.0193	0.0153	0.0421	0.0238	-0.0045	0.014	0.0745	0.0146	0.0457	0.015	0.025	0.0145	0.0909	0.0167	0.0157	0.0121	-0.0024	0.0159	0.0763	0.0204	-0.0012	0.0095	-0.007	0.0137	0.0163
41.3333	-0.0078	0.0162	0.0037	0.0218	0.0196	0.0149	0.0173	0.013	-0.0048	0.0154	-0.0146	0.0146	0.0354	0.0212	-0.0085	0.0159	0.0252	0.012	0.0248	0.02	-0.0097	0.0092	0.0142	0.0138	-0.0179	0.0148	0.0411	0.0243	-0.0031	0.0137	0.074	0.0146	0.0448	0.0149	0.0237	0.0145	0.0908	0.0171	0.0177	0.0124	-0.0039	0.0157	0.0771	0.021	-0.003	0.0098	-0.0082	0.0133	-0.0016
41.6667	-0.0133	0.0161	0.0056	0.0219	0.0204	0.0146	0.017	0.013	-0.0049	0.0155	-0.0158	0.0147	0.0372	0.0215	-0.0086	0.0157	0.0226	0.0121	0.0258	0.0197	-0.0083	0.0093	0.0131	0.0138	-0.0167	0.0143	0.0407	0.0248	-0.003	0.0136	0.073	0.0146	0.0458	0.0146	0.0265	0.0147	0.0899	0.0173	0.0181	0.0126	-0.0042	0.0157	0.0784	0.022	0.0014	0.0095	-0.0086	0.0134	-0.0139
42	-0.0119	0.0164	0.0032	0.0221	0.02	0.0142	0.0176	0.0128	-0.0053	0.0157	-0.0161	0.015	0.0372	0.0217	-0.008	0.0156	0.0195	0.0121	0.0247	0.0199	-0.0063	0.0092	0.0104	0.0139	-0.0139	0.0143	0.0375	0.0258	-0.0017	0.0136	0.0716	0.0144	0.046	0.0144	0.0311	0.0149	0.0896	0.0173	0.0182	0.0127	-0.0068	0.0156	0.0757	0.0218	0.0009	0.0096	-0.0095	0.0139	-0.0157
42.3333	-0.01	0.0172	0.0015	0.0224	0.0185	0.0141	0.0173	0.0128	-0.0047	0.0159	-0.017	0.0151	0.0366	0.0221	-0.0077	0.0154	0.0185	0.0117	0.0239	0.0199	-0.0057	0.009	0.0094	0.0137	-0.0118	0.0146	0.0338	0.0258	-0.0023	0.0137	0.0699	0.0143	0.0467	0.0144	0.0352	0.0149	0.091	0.0173	0.018	0.0131	-0.0091	0.0155	0.0736	0.0218	0.0018	0.0097	-0.0123	0.0142	0.0034
42.6667	-0.0094	0.0176	0.0035	0.0224	0.0163	0.0141	0.0167	0.0126	-0.0028	0.0162	-0.0184	0.0156	0.0365	0.0223	-0.007	0.0151	0.0164	0.0114	0.0233	0.0202	-0.0042	0.0091	0.0079	0.0135	-0.0113	0.0146	0.0307	0.0251	-0.0032	0.0137	0.0689	0.0144	0.0467	0.0144	0.0382	0.0151	0.0905	0.0174	0.0188	0.0136	-0.0136	0.0154	0.0701	0.0211	0.0018	0.0098	-0.0114	0.0134	0.0139
43	-0.0085	0.0179	0.0024	0.0222	0.0137	0.0139	0.017	0.0123	-0.0031	0.0163	-0.0199	0.0157	0.0341	0.0224	-0.0077	0.0148	0.0125	0.0113	0.0227	0.0205	-0.0029	0.0091	0.0071	0.0134	-0.0111	0.0147	0.0289	0.0243	-0.0042	0.0137	0.0689	0.0142	0.0487	0.0143	0.038	0.0154	0.0904	0.0175	0.019	0.014	-0.0163	0.0151	0.0755	0.0213	0.0026	0.0095	-0.0116	0.013	0.0026
43.3333	-0.0087	0.0181	-0.0007	0.0219	0.011	0.0137	0.0187	0.0124	-0.0005	0.0163	-0.0203	0.016	0.034	0.0229	-0.0071	0.0144	0.0108	0.011	0.0226	0.021	-0.002	0.0089	0.0051	0.0135	-0.0087	0.0148	0.0306	0.0242	-0.0042	0.0139	0.0702	0.0138	0.0485	0.0143	0.0383	0.0154	0.0899	0.0176	0.0201	0.0142	-0.0187	0.015	0.0776	0.0212	0.0027	0.0095	-0.012	0.0128	0.0245
43.6667	-0.011	0.0175	-0.0045	0.022	0.0103	0.0138	0.0183	0.0124	0.0022	0.0165	-0.0172	0.0156	0.0332	0.0237	-0.0057	0.0144	0.0116	0.0111	0.0214	0.0211	-0.004	0.0089	0.0031	0.0134	-0.0092	0.0151	0.03	0.0237	-0.0028	0.0137	0.0695	0.0137	0.0476	0.0144	0.0401	0.0151	0.0895	0.0177	0.0208	0.0144	-0.0211	0.0152	0.075	0.0203	0.0017	0.0093	-0.0154	0.0128	0.0176
44	-0.0079	0.0185	-0.0065	0.0216	0.0091	0.0138	0.0174	0.0125	0.0009	0.017	-0.0178	0.0156	0.0338	0.0237	-0.0047	0.0143	0.0095	0.011	0.0232	0.0214	-0.0035	0.009	0.0056	0.0139	-0.0102	0.0155	0.0269	0.0239	-0.0014	0.0135	0.0714	0.0136	0.0457	0.0146	0.0415	0.0151	0.0883	0.0177	0.022	0.0143	-0.0217	0.0154	0.0779	0.0205	0.0014	0.0092	-0.012	0.012	0.0183
44.3333	-0.0089	0.0187	-0.0076	0.0213	0.0071	0.0133	0.0171	0.0125	0.0021	0.0174	-0.018	0.0158	0.0348	0.0235	-0.004	0.0145	0.0082	0.0108	0.0256	0.0214	-0.0033	0.0092	0.0045	0.0142	-0.0102	0.0156	0.0269	0.0245	-0.0007	0.0136	0.0728	0.0136	0.0458	0.0145	0.0415	0.0147	0.0866	0.0176	0.0196	0.0143	-0.0248	0.0155	0.0761	0.02	0.0003	0.0092	-0.0137	0.0119	0.0241
44.6667	-0.009	0.0188	-0.0095	0.0218	0.006	0.013	0.0169	0.0125	0.0013	0.0178	-0.0175	0.0159	0.0341	0.0237	-0.0067	0.0147	0.0057	0.0108	0.0246	0.0214	-0.0023	0.0092	0.005	0.0143	-0.0099	0.0158	0.0268	0.0256	0.0005	0.0141	0.0738	0.0136	0.0463	0.0148	0.0392	0.0145	0.0821	0.0177	0.0179	0.014	-0.0262	0.0157	0.0726	0.0198	0.0004	0.0089	-0.0139	0.0119	0.0136
45	-0.0084	0.0188	-0.0083	0.0216	0.0037	0.013	0.0157	0.0125	0.003	0.018	-0.0174	0.0158	0.0335	0.0235	-0.0062	0.0146	0.0045	0.0109	0.0241	0.0208	-0.0011	0.0091	0.0055	0.0141	-0.0088	0.016	0.0239	0.026	0.0002	0.0145	0.0742	0.0138	0.0463	0.0145	0.0365	0.0144	0.079	0.0177	0.0169	0.014	-0.0271	0.016	0.0732	0.0197	0.0011	0.0087	-0.0126	0.012	0.0083
45.3333	-0.0071	0.0184	-0.0081	0.0212	0.0031	0.0132	0.017	0.0123	0.0025	0.0182	-0.0178	0.0158	0.0339	0.0237	-0.0071	0.0148	0.0045	0.0109	0.0242	0.0203	0.0002	0.009	0.0049	0.0136	-0.0096	0.0162	0.0207	0.0257	-0.0012	0.0149	0.0736	0.0138	0.0447	0.0145	0.0344	0.0142	0.0758	0.0176	0.0156	0.0142	-0.0271	0.016	0.0694	0.0197	0.0007	0.0086	-0.0105	0.0121	0.0136
45.6667	-0.0052	0.0182	-0.0085	0.0211	0.0029	0.0131	0.0159	0.0122	0.0016	0.0181	-0.0176	0.0158	0.0354	0.0243	-0.0086	0.015	0.0036	0.0111	0.0231	0.0201	0.0015	0.0091	0.0021	0.0135	-0.0111	0.0164	0.0207	0.0257	-0.0023	0.0151	0.0736	0.0141	0.0439	0.0145	0.0317	0.014	0.074	0.0174	0.0144	0.0141	-0.0265	0.0164	0.066	0.0197	-0.0003	0.0085	-0.0103	0.012	0.0138
46	-0.0056	0.0178	-0.0068	0.0208	0.0019	0.013	0.0156	0.012	-0.0015	0.0186	-0.0167	0.0157	0.0367	0.0245	-0.0091	0.015	0.0029	0.0114	0.0222	0.0201	0.0021	0.0089	0.0016	0.0129	-0.0114	0.0168	0.0212	0.0255	-0.0028	0.0154	0.0721	0.0142	0.0452	0.0147	0.0289	0.0137	0.0711	0.0176	0.013	0.0143	-0.0275	0.0169	0.0597	0.0204	-0.0013	0.0083	-0.0121	0.0124	0.0074
46.3333	-0.0076	0.0176	-0.0037	0.0208	0.0017	0.0129	0.016	0.0118	-0.0042	0.0184	-0.016	0.0154	0.0363	0.0245	-0.0098	0.0152	0.0027	0.0116	0.0202	0.0199	0.0024	0.0088	-0.001	0.0128	-0.0109	0.0167	0.0231	0.0258	-0.0034	0.0155	0.0712	0.0143	0.0439	0.0146	0.0269	0.0137	0.0691	0.0175	0.013	0.0144	-0.0278	0.0174	0.0589	0.0197	-0.0009	0.0082	-0.011	0.0124	0.02
46.6667	-0.0067	0.0176	-0.0039	0.0207	0.0014	0.0129	0.0139	0.0116	-0.0023	0.0179	-0.016	0.0154	0.0352	0.0246	-0.011	0.0155	0.0021	0.0117	0.0174	0.0198	0.0019	0.0089	-0.0034	0.0125	-0.0098	0.0167	0.0268	0.0257	-0.0049	0.0157	0.0707	0.0144	0.0417	0.0146	0.0262	0.0137	0.067	0.0175	0.0113	0.0144	-0.0281	0.0177	0.0578	0.0202	-0.0002	0.0083	-0.0118	0.0123	0.0252
47	-0.0017	0.0179	-0.0061	0.0213	0.0011	0.0131	0.0129	0.0115	-0.0022	0.0179	-0.018	0.0157	0.0352	0.0245	-0.0091	0.0159	0.0026	0.012	0.008	0.0202	0.0012	0.0087	-0.0015	0.0127	-0.0087	0.0166	0.0327	0.0259	-0.0045	0.0158	0.069	0.0147	0.0391	0.0144	0.0266	0.0143	0.0644	0.0173	0.0085	0.0143	-0.027	0.0181	0.0564	0.019	-0.0051	0.0088	-0.0105	0.0125	0.0039
47.3333	-0.0015	0.0182	-0.007	0.0215	0.0015	0.0133	0.0123	0.0114	-0.0027	0.0177	-0.0174	0.0157	0.0349	0.0244	-0.0077	0.0161	0.0026	0.0122	0.0093	0.0184	0.0019	0.0088	-0.0005	0.0132	-0.0072	0.0163	0.0397	0.0255	-0.0021	0.0154	0.0663	0.0149	0.038	0.0143	0.0273	0.0141	0.0616	0.0172	0.0063	0.0144	-0.0255	0.0185	0.0578	0.0195	-0.0004	0.008	-0.0132	0.0127	-0.0002
47.6667	-0.0013	0.0179	-0.0073	0.022	0.0022	0.0132	0.0131	0.0115	-0.0025	0.0172	-0.0186	0.0158	0.0347	0.0247	-0.0067	0.0159	0.0007	0.0123	0.0091	0.0182	0.002	0.0088	-0.0023	0.0133	-0.0052	0.0161	0.0405	0.0257	-0.0027	0.0151	0.0657	0.0149	0.0393	0.0141	0.0267	0.014	0.0599	0.0169	0.0077	0.0141	-0.0254	0.0188	0.054	0.0189	-0.0012	0.0081	-0.0126	0.0126	0.0137
48	0.0005	0.0179	-0.0078	0.0223	0.0024	0.0132	0.0134	0.0116	-0.0026	0.0168	-0.0206	0.0158	0.0371	0.025	-0.0063	0.0157	-0.0011	0.0126	0.0095	0.0181	-0.0002	0.009	-0.0048	0.0135	-0.0046	0.0162	0.0404	0.0258	-0.0025	0.0152	0.0664	0.0149	0.0409	0.0143	0.0245	0.0138	0.0567	0.0165	0.0092	0.014	-0.0257	0.0192	0.0563	0.0185	0.0013	0.0081	-0.0136	0.0124	0.0298
48.3333	0.0015	0.0179	-0.0083	0.0228	0.0026	0.013	0.0119	0.0121	-0.0024	0.0168	-0.0217	0.0158	0.0385	0.0252	-0.0048	0.0159	-0.0021	0.0129	0.0081	0.0181	-0.0015	0.0091	-0.0055	0.0135	-0.0047	0.016	0.0409	0.0261	-0.0032	0.0153	0.0655	0.0151	0.0408	0.0148	0.0253	0.0139	0.0532	0.0163	0.0097	0.0142	-0.0247	0.0197	0.0535	0.0187	0.0009	0.0084	-0.0113	0.0127	0.0205
48.6667	-0.0011	0.017	-0.0087	0.0234	0.0028	0.0128	0.014	0.0122	-0.0024	0.0171	-0.0213	0.0159	0.0381	0.0252	-0.0048	0.0155	-0.0043	0.0131	0.008	0.0182	-0.0007	0.0091	-0.0037	0.0135	-0.004	0.0157	0.0391	0.026	-0.0031	0.0154	0.0656	0.0153	0.0416	0.0149	0.0231	0.0142	0.0527	0.0163	0.0108	0.0143	-0.0213	0.0204	0.0585	0.0193	0.0041	0.0082	-0.0154	0.0125	0.0266
49	0.0017	0.0169	-0.0067	0.0235	0.0036	0.0131	0.0148	0.0123	-0.0026	0.0168	-0.0203	0.0162	0.0372	0.0248	-0.0053	0.0152	-0.0056	0.0131	0.0083	0.0183	-0.0012	0.009	-0.0046	0.0135	-0.0016	0.0158	0.0393	0.0262	-0.0037	0.0156	0.0644	0.0152	0.04	0.0147	0.0205	0.0141	0.0496	0.0162	0.0085	0.0141	-0.0214	0.021	0.0557	0.0186	0.004	0.0082	-0.0142	0.0122	0.0169
49.3333	0.0026	0.0168	-0.0067	0.0228	0.0015	0.0131	0.0142	0.0122	-0.0006	0.0164	-0.0204	0.0161	0.0365	0.0245	-0.005	0.0155	-0.0067	0.0133	0.0076	0.0182	0.0002	0.0089	-0.0056	0.0137	-0.0033	0.0159	0.0369	0.0264	-0.0024	0.0156	0.0637	0.0152	0.0388	0.0148	0.0178	0.0141	0.0499	0.0165	0.008	0.0141	-0.023	0.0211	0.055	0.0185	0.0032	0.0081	-0.013	0.012	-0.0049
49.6667	0.0024	0.0163	-0.0062	0.022	0.0009	0.0128	0.0141	0.0122	3.64e-05	0.0165	-0.0189	0.016	0.0363	0.0245	-0.0041	0.0159	-0.0062	0.0135	0.0072	0.0182	-0.0004	0.0088	-0.0087	0.0135	-0.0058	0.0162	0.0356	0.0271	-0.0017	0.0157	0.0634	0.0154	0.038	0.015	0.0162	0.0143	0.048	0.0165	0.0069	0.0141	-0.0231	0.0213	0.0535	0.0188	0.0005	0.008	-0.0115	0.0123	0.0062
50	0.003	0.0162	-0.0047	0.0221	0.0029	0.0127	0.0164	0.0123	0.0006	0.0168	-0.018	0.0159	0.0357	0.0244	-0.0019	0.0159	-0.0065	0.0134	0.0081	0.018	-0.0013	0.0087	-0.0087	0.0134	-0.0061	0.0164	0.036	0.0277	-0.0013	0.0158	0.0624	0.0154	0.0372	0.0151	0.0157	0.0142	0.0464	0.0163	0.0067	0.0144	-0.0218	0.0213	0.0552	0.0188	-0.0017	0.0083	-0.019	0.0129	0.0006
50.3333	0.0027	0.0157	0.0017	0.0212	0.0031	0.0124	0.0149	0.0126	-0.0025	0.0167	-0.0166	0.0157	0.0389	0.0237	0.0019	0.0162	-0.0067	0.0133	0.0085	0.0176	-0.0042	0.0083	-0.0073	0.0136	-0.006	0.0165	0.0357	0.0278	-0.0018	0.0159	0.0612	0.0154	0.0346	0.015	0.0147	0.0144	0.0459	0.016	0.0057	0.0146	-0.0203	0.0216	0.0487	0.0179	-0.0021	0.0083	-0.0132	0.0121	-0.0121
50.6667	0.0026	0.0158	0.007	0.0212	0.0024	0.0123	0.0154	0.0127	-0.0013	0.0167	-0.0169	0.0155	0.0382	0.0236	0.0026	0.0164	-0.0071	0.0133	0.0115	0.0174	-0.0033	0.0081	-0.0083	0.0136	-0.0084	0.0165	0.0352	0.0277	-0.0034	0.0162	0.06	0.0155	0.032	0.0149	0.0121	0.0144	0.0472	0.016	0.0013	0.0148	-0.022	0.0216	0.0531	0.0179	0.0002	0.0081	-0.0137	0.0116	-0.0161
51	5.91e-05	0.0152	0.0098	0.0204	0.0036	0.0127	0.016	0.0131	-0.0009	0.0167	-0.0167	0.0152	0.0367	0.0239	0.0011	0.0164	-0.0075	0.0134	0.0115	0.0173	-0.0017	0.008	-0.0094	0.0136	-0.0095	0.0165	0.0332	0.027	-0.0041	0.0162	0.0605	0.0156	0.0307	0.0153	0.013	0.0146	0.0483	0.016	-0.0003	0.0146	-0.0225	0.0215	0.0531	0.0173	-0.002	0.0085	-0.0149	0.0116	-0.015
51.3333	0.0008	0.0156	0.0064	0.0196	0.0036	0.0131	0.0173	0.0135	-0.0002	0.0169	-0.0154	0.015	0.035	0.0241	0.0002	0.0164	-0.0094	0.0133	0.0122	0.0172	-0.0008	0.0079	-0.0097	0.0137	-0.008	0.0166	0.0324	0.0273	-0.0077	0.0161	0.0587	0.0154	0.0306	0.0153	0.0132	0.0148	0.0485	0.0163	-0.0016	0.0147	-0.0235	0.0212	0.0521	0.0176	-0.0044	0.0087	-0.0164	0.0119	-0.0262
51.6667	0.0009	0.0155	0.0042	0.0191	0.0043	0.0136	0.018	0.0138	0.0013	0.0171	-0.0149	0.0152	0.031	0.0239	0.0022	0.0165	-0.0105	0.0132	0.0129	0.0173	-0.001	0.0077	-0.0088	0.0135	-0.0038	0.0165	0.0327	0.0269	-0.0101	0.0161	0.0562	0.0155	0.0295	0.0151	0.0134	0.015	0.0495	0.0163	-0.0034	0.0147	-0.0253	0.021	0.053	0.0181	-0.0047	0.0089	-0.017	0.012	-0.0202
52	0.0014	0.0156	0.0019	0.0177	0.0068	0.0142	0.0162	0.014	0.0024	0.0175	-0.0151	0.0153	0.0293	0.0237	0.0028	0.0168	-0.0112	0.0133	0.0108	0.0178	-0.0016	0.0077	-0.0099	0.0136	-0.0028	0.0162	0.0303	0.0271	-0.0099	0.0166	0.057	0.0154	0.0278	0.0149	0.0124	0.015	0.0496	0.0164	-0.0059	0.0147	-0.0269	0.0209	0.0541	0.0181	-0.0059	0.0092	-0.0149	0.0123	-0.0279
52.3333	0.0016	0.0157	0.0017	0.0176	0.0078	0.0144	0.0147	0.0142	0.0024	0.0175	-0.0146	0.0152	0.0252	0.0232	0.0034	0.0172	-0.0102	0.0134	0.0103	0.0185	0.0003	0.0078	-0.0091	0.0137	-0.0023	0.0159	0.0281	0.0275	-0.0107	0.0166	0.0555	0.0154	0.027	0.015	0.0124	0.0152	0.0502	0.0163	-0.0075	0.0145	-0.0271	0.021	0.0531	0.0179	-0.0072	0.0096	-0.0179	0.0129	-0.0278
52.6667	-0.0011	0.016	0.0012	0.0175	0.0081	0.0145	0.0122	0.0142	0.0024	0.0176	-0.0109	0.0151	0.0223	0.0228	0.0027	0.0176	-0.0103	0.0135	0.0107	0.0187	0.0006	0.0077	-0.0111	0.0138	-0.0013	0.0155	0.0277	0.0275	-0.0137	0.0165	0.053	0.0154	0.0266	0.0151	0.0123	0.0154	0.0512	0.016	-0.0086	0.0147	-0.0268	0.021	0.0496	0.0178	-0.0072	0.0096	-0.0193	0.0129	-0.0377
53	-0.0012	0.0161	0.0011	0.0176	0.0098	0.0145	0.0108	0.0141	0.0047	0.0178	-0.0095	0.0152	0.0211	0.0225	0.0019	0.0178	-0.011	0.0136	0.0089	0.0189	0.0011	0.0077	-0.0132	0.014		0.0149	0.0314	0.0271	-0.0153	0.0164	0.0506	0.0152	0.0262	0.0151	0.0123	0.0153	0.0507	0.0158	-0.0085	0.0147	-0.0282	0.0211	0.0453	0.0178	-0.0064	0.0095	-0.0194	0.0125	-0.033
53.3333	-0.0009	0.0164	0.0035	0.0172	0.013	0.0144	0.0113	0.0141	0.0062	0.0177	-0.0084	0.0152	0.0236	0.023	0.0015	0.0179	-0.0108	0.0138	0.0061	0.0189	-0.0011	0.008	-0.011	0.014	0.001	0.0145	0.0333	0.0269	-0.0162	0.0162	0.0489	0.0149	0.0255	0.0154	0.0113	0.0153	0.0498	0.0158	-0.011	0.0148	-0.0297	0.0213	0.0462	0.0182	-0.0077	0.0094	-0.0162	0.0125	-0.0169
53.6667	-0.0021	0.0167	-0.0035	0.0178	0.0119	0.0146	0.0135	0.0136	0.0052	0.0179	-0.0072	0.0154	0.0159	0.0229	0.003	0.0181	-0.0111	0.014	0.0085	0.0184	-0.0047	0.0081	-0.0134	0.0141	0.0031	0.0142	0.0343	0.0272	-0.0184	0.0162	0.0475	0.015	0.0236	0.0156	0.0086	0.0154	0.0481	0.016	-0.0129	0.015	-0.0299	0.021	0.05	0.0177	-0.0085	0.0096	-0.0128	0.0119	-0.0083
54	-0.0041	0.0167	0.0007	0.0173	0.0116	0.0151	0.0147	0.014	0.0075	0.0181	-0.0084	0.0158	0.0155	0.0229	0.0019	0.0179	-0.0122	0.0142	0.0067	0.0185	-0.005	0.0084	-0.0137	0.014	0.0051	0.0137	0.0344	0.0283	-0.0186	0.016	0.0467	0.0149	0.0195	0.0158	0.009	0.0154	0.0485	0.0161	-0.0125	0.0153	-0.0289	0.021	0.0522	0.0178	-0.0064	0.0096	-0.0132	0.0122	-0.0038
54.3333	-0.0047	0.0166	0.0063	0.0175	0.013	0.015	0.016	0.0141	0.0094	0.018	-0.0073	0.0158	0.0159	0.0228	0.0022	0.0182	-0.0144	0.0143	0.004	0.0187	-0.0052	0.0087	-0.0151	0.0142	0.0089	0.0134	0.0342	0.029	-0.0187	0.016	0.0467	0.0148	0.0201	0.0158	0.0071	0.0154	0.0506	0.016	-0.0133	0.0151	-0.0279	0.0212	0.0529	0.0177	-0.0038	0.0097	-0.0133	0.0125	-0.013
54.6667	-0.0046	0.0165	0.006	0.0175	0.0139	0.0147	0.0157	0.014	0.0129	0.0178	-0.0059	0.0158	0.016	0.0233	0.0007	0.0182	-0.0145	0.0143	0.0032	0.0188	-0.0061	0.0089	-0.0158	0.0144	0.0127	0.0133	0.0319	0.0294	-0.0183	0.0163	0.0463	0.0152	0.0203	0.0158	0.0052	0.0155	0.0494	0.0161	-0.0131	0.0152	-0.0279	0.0213	0.0523	0.0178	-0.0023	0.0098	-0.0122	0.0127	-0.0238
55	-0.0043	0.0164	0.0038	0.0176	0.0144	0.0146	0.0147	0.0141	0.0135	0.0178	-0.0062	0.0158	0.0166	0.0236	-0.0012	0.0182	-0.0166	0.0144	0.0019	0.0187	-0.0066	0.0091	-0.017	0.0146	0.0119	0.0134	0.0304	0.0296	-0.0184	0.0163	0.0468	0.0153	0.0195	0.016	0.0039	0.0157	0.047	0.0162	-0.014	0.0153	-0.0291	0.021	0.0526	0.0178	-0.0022	0.0097	-0.0127	0.0122	-0.0221
55.3333	-0.0039	0.016	-0.0016	0.0179	0.0141	0.0148	0.0136	0.0141	0.013	0.0177	-0.0065	0.0159	0.0185	0.024	-0.0051	0.0181	-0.0166	0.0143	0.0048	0.0191	-0.0066	0.0096	-0.0172	0.0146	0.0101	0.0135	0.028	0.03	-0.0187	0.0163	0.0455	0.0155	0.0194	0.0163	0.004	0.016	0.0453	0.016	-0.0147	0.0153	-0.0286	0.021	0.0534	0.0176	-0.0017	0.0099	-0.0092	0.0128	-0.019
55.6667	-0.0018	0.0159	-0.0047	0.0184	0.0133	0.0147	0.0148	0.0141	0.0125	0.0175	-0.0055	0.0161	0.017	0.0242	-0.006	0.0179	-0.0157	0.0143	0.0049	0.0195	-0.0054	0.0096	-0.0175	0.0147	0.009	0.014	0.028	0.0306	-0.0189	0.0165	0.0462	0.0155	0.0184	0.0163	0.0023	0.0162	0.0434	0.0158	-0.0159	0.015	-0.0303	0.0206	0.0521	0.0176	-0.002	0.0098	-0.0097	0.0131	-0.0023
56	-0.0023	0.0155	-0.0077	0.0184	0.0109	0.0144	0.0122	0.014	0.0115	0.0176	-0.0055	0.0161	0.0146	0.0238	-0.0074	0.018	-0.0149	0.0143	0.0054	0.0196	-0.0055	0.0095	-0.0204	0.0148	0.0066	0.0144	0.0283	0.0313	-0.0205	0.0167	0.0464	0.0158	0.0182	0.0166	0.0013	0.0162	0.0423	0.0158	-0.0154	0.015	-0.0324	0.0201	0.0533	0.018	-0.0043	0.0102	-0.0099	0.0133	-0.0005
56.3333	-0.0005	0.0154	-0.0108	0.019	0.0093	0.0142	0.0111	0.014	0.012	0.0176	-0.0072	0.0158	0.0125	0.0238	-0.0069	0.018	-0.013	0.0144	0.0047	0.0195	-0.0066	0.0098	-0.0223	0.0154	0.0048	0.0147	0.0292	0.0321	-0.02	0.0165	0.0469	0.0159	0.0184	0.0167	-0.0019	0.016	0.0398	0.0157	-0.0133	0.0149	-0.0346	0.0196	0.053	0.0179	-0.0005	0.01	-0.0105	0.0133	0.0109
56.6667	-0.0005	0.0156	-0.0147	0.0203	0.0091	0.0142	0.0096	0.0141	0.012	0.0178	-0.0092	0.0159	0.0109	0.0237	-0.0062	0.0178	-0.0127	0.0145	0.0027	0.0197	-0.0058	0.0092	-0.0252	0.0155	0.0033	0.015	0.0301	0.0332	-0.0201	0.0164	0.0459	0.0162	0.0188	0.0165	-0.0036	0.0157	0.0371	0.016	-0.0109	0.0148	-0.0354	0.0192	0.0525	0.0182	0.0018	0.0101	-0.0121	0.0133	0.0063
57	0.0014	0.0158	-0.0195	0.0218	0.0077	0.0144	0.0075	0.0141	0.0117	0.0177	-0.0099	0.0157	0.0091	0.0233	-0.0054	0.0177	-0.0136	0.0147	-0.0029	0.0205	-0.0061	0.0089	-0.0259	0.0152	-0.0002	0.0154	0.0322	0.0338	-0.0188	0.0164	0.0419	0.0164	0.0191	0.0164	-0.0039	0.0156	0.0341	0.0156	-0.0123	0.0144	-0.0345	0.0198	0.0471	0.0177	0.0011	0.0102	-0.0101	0.0135	-0.0113
57.3333	0.0015	0.0158	-0.0241	0.0236	0.0063	0.0144	0.0083	0.014	0.0108	0.0177	-0.0114	0.0155	0.007	0.0231	-0.0047	0.0173	-0.0131	0.0148	-0.0069	0.0207	-0.0083	0.0089	-0.0265	0.0154	-0.0037	0.016	0.0326	0.0329	-0.0185	0.0163	0.0425	0.0165	0.0184	0.0162	-0.0041	0.0159	0.0318	0.0155	-0.0123	0.0144	-0.0343	0.0195	0.0478	0.0182	-0.0004	0.0102	-0.0097	0.0138	-0.0336
57.6667	0.0007	0.0162	-0.0252	0.0243	0.0045	0.0144	0.0082	0.0141	0.0104	0.0175	-0.0131	0.0154	0.0058	0.0233	-0.0046	0.0169	-0.0122	0.015	-0.0096	0.0204	-0.0074	0.0084	-0.0276	0.0156	-0.0066	0.0164	0.0299	0.0316	-0.0178	0.0163	0.0406	0.0167	0.0163	0.0161	-0.0044	0.016	0.0326	0.0153	-0.0111	0.0142	-0.0357	0.0195	0.048	0.0179	-0.0017	0.0101	-0.0092	0.014	-0.0299
58	0.0018	0.0167	-0.0253	0.0248	0.0017	0.0145	0.0082	0.0144	0.0093	0.0172	-0.0147	0.0157	0.0031	0.0232	-0.0053	0.0166	-0.0119	0.0152	-0.0102	0.0202	-0.0073	0.0083	-0.0289	0.0158	-0.0073	0.0167	0.0274	0.0323	-0.0186	0.0164	0.0386	0.0168	0.0135	0.0156	-0.0038	0.0162	0.0334	0.0152	-0.0075	0.0141	-0.035	0.019	0.0484	0.0181	-0.0019	0.01	-0.012	0.0145	-0.0233
58.3333	0.0027	0.0166	-0.0273	0.0252	0.0005	0.0145	0.0096	0.0148	0.0051	0.0174	-0.0149	0.0157	0.0038	0.0231	-0.004	0.0165	-0.012	0.0153	-0.0107	0.0203	-0.0093	0.0084	-0.03	0.016	-0.0057	0.0166	0.027	0.0328	-0.0179	0.0166	0.0401	0.0165	0.0094	0.0159	-0.0037	0.0163	0.0351	0.0153	-0.0061	0.014	-0.0342	0.0183	0.048	0.0183	-0.0052	0.0102	-0.0124	0.0148	-0.0197
58.6667	0.0043	0.0164	-0.0289	0.0261	-0.0011	0.0145	0.0111	0.0148	0.0014	0.0177	-0.0167	0.0157	0.0049	0.0233	-0.0029	0.0164	-0.0123	0.0154	-0.0122	0.0204	-0.0088	0.0088	-0.0314	0.016	-0.0023	0.0167	0.0248	0.0321	-0.0188	0.0165	0.0409	0.0163	0.0057	0.0157	-0.003	0.0162	0.0354	0.0152	-0.0071	0.0136	-0.0345	0.0178	0.0447	0.0182	-0.0047	0.0099	-0.0108	0.0149	-0.0161
59	0.0055	0.0163	-0.0274	0.0268	-0.0028	0.0149	0.0121	0.0148	0.0002	0.0172	-0.0193	0.0156	0.0043	0.0233	-0.001	0.0162	-0.012	0.0157	-0.0104	0.0208	-0.0077	0.0085	-0.0344	0.0157	2.48e-05	0.0169	0.0234	0.0316	-0.0177	0.0163	0.0411	0.016	0.005	0.0154	-0.0029	0.0163	0.0347	0.0152	-0.009	0.0137	-0.0345	0.0179	0.0452	0.0187	-0.0061	0.0101	-0.0124	0.0151	-0.0085
59.3333	0.0069	0.0163	-0.0259	0.0267	-0.0047	0.0151	0.0136	0.0146	-0.0003	0.017	-0.0222	0.0154	0.0039	0.0235	-0.0039	0.0159	-0.0114	0.0161	-0.0094	0.0207	-0.007	0.0083	-0.037	0.0158	0.0031	0.0171	0.0185	0.0319	-0.0158	0.016	0.0396	0.0158	0.0048	0.015	-0.0028	0.0162	0.0339	0.0152	-0.0066	0.014	-0.0344	0.0182	0.0434	0.0183	-0.0055	0.0101	-0.0121	0.0152	-0.0043
59.6667	0.0083	0.0165	-0.0263	0.0268	-0.0037	0.0154	0.0141	0.0148	-0.0036	0.0168	-0.025	0.0154	0.0053	0.0235	-0.0061	0.0157	-0.0104	0.0165	-0.0089	0.0208	-0.0077	0.0085	-0.0403	0.0155	0.0047	0.0169	0.0178	0.032	-0.0143	0.0157	0.0369	0.0156	0.0045	0.0146	-0.004	0.0162	0.0329	0.0151	-0.0073	0.0142	-0.0375	0.0184	0.0424	0.0185	-0.0065	0.0101	-0.0123	0.0152	-0.0012
60
[truncated: 47 more columns]
