# Supplementary material for: Neural circuit mechanisms for transforming learned olfactory valences into wind-oriented movement
Source: eLife. 2023 Sep 18;12:e85756. doi: 10.7554/eLife.85756 (PMC10588983; doi:10.7554/eLife.85756)
Supplement: Figure 1—source data 6. [file elife-85756-fig1-data6.xlsx]

## Sheet: Sheet1
Odor	PA					PA					EL					EL
Training	CS+					CS-					CS+					CS-
Data type	Delta distance from center					Delta distance from center					Delta distance from center					Delta distance from center
Genotype	w;w,20xUAS-CsChrimson-mVenus; +/Empty-split-GA4	w;w,20xUAS-CsChrimson-mVenus; MB109B/MB315C	w;w,20xUAS-CsChrimson-mVenus; +/MB312C	w;w,20xUAS-CsChrimson-mVenus; +/MB213B	w;w,20xUAS-CsChrimson-mVenus; +/MB043C	w;w,20xUAS-CsChrimson-mVenus; +/Empty-split-GA4	w;w,20xUAS-CsChrimson-mVenus; MB109B/MB315C	w;w,20xUAS-CsChrimson-mVenus; +/MB312C	w;w,20xUAS-CsChrimson-mVenus; +/MB213B	w;w,20xUAS-CsChrimson-mVenus; +/MB043C	w;w,20xUAS-CsChrimson-mVenus; +/Empty-split-GA4	w;w,20xUAS-CsChrimson-mVenus; MB109B/MB315C	w;w,20xUAS-CsChrimson-mVenus; +/MB312C	w;w,20xUAS-CsChrimson-mVenus; +/MB213B	w;w,20xUAS-CsChrimson-mVenus; +/MB043C	w;w,20xUAS-CsChrimson-mVenus; +/Empty-split-GA4	w;w,20xUAS-CsChrimson-mVenus; MB109B/MB315C	w;w,20xUAS-CsChrimson-mVenus; +/MB312C	w;w,20xUAS-CsChrimson-mVenus; +/MB213B	w;w,20xUAS-CsChrimson-mVenus; +/MB043C
#01	-0.062	0.0077	0.0016	0.1192	0.1109	0.0837	-0.023	-0.033	-0.094	-0.143	0.0307	0.08	0.1218	0.1478	0.1964	-0.008	0.1548	-0.005	0.0306	-0.0007
#02	0.1212	0.1733	0.1064	0.2427	0.1082	0.0546	-0.087	-0.08	0.0639	0.0633	0.0982	0.1885	0.2731	0.2846	0.0684	0.1418	0.0375	0.2345	0.18	0.0202
#03	-0.117	-0.078	-0.019	0.1101	0.0531	0.0714	0.0216	-0.055	-0.016	-0.039	0.0873	0.1202	0.2013	0.2864	0.0961	-0.067	0.1356	-0.042	-0.135	-0.024
#04	0.0036	0.0717	0.0472	0.1457	0.1771	0.0736	0.0539	0.1079	-0.062	-0.025	0.0145	0.0381	0.1018	0.1404	0.1023	-0.089	0.0689	0.1289	0.088	0.0144
#05	-0.167	0.0852	0.0701	0.1136	0.0804	0.1715	0.0126	-0.038	0.1194	-0.081	0.2764	0.038	0.0789	0.1241	0.1521	-0.002	-0.004	-0.013	0.0334	0.0108
#06	-0.005	0.0395	-0.054	0.2449	0.0101	0.0222	-0.018	-0.001	-0.033	-0.011	0.1499	0.0266	0.0839	0.2009	0.2994	0.3193	0.0598	0.0324	0.1906	-0.007
#07	0.0598	0.1014	0.0366	0.0865	0.2357	-0.022	0.1015	0.0502	-0.123	-0.077	0.0135	0.1301	0.124	0.3583	0.3277	0.1111	-0.065	0.0217	0.0332	0.1538
#08	0.2144	0.0452	0.0062	-0.093	0.3709	0.1155	0.093	-0.016	0.0075	-0.04	0.0526	-0.027	0.0709	0.0896	0.0811	0.0886	0.0853	0.1016	0.0871	-0.002
#09	-0.12	-0.118	0.1266	0.0932	0.0551	-0.021	0.1796	0.1139	0.004	-0.004	0.033	0.1114	0.2823	0.239	0.2062	0.1386	0.0629	0.0368	0.1323	0.1294
#10	0.1935	-0.058	0.1774	0.2935	0.1566	0.0132	0.0971	-0.024	-0.071	-0.004	0.058	0.0621	0.3205	0.0774	0.0039	-0.066	0.0563	0.0949	0.1415	-0.015
#11	0.0704	0.1439	0.02	0.23	0.1375	0.0784	0.198	0.0977	-0.036	-0.021	-0.1	0.0631	0.1189	0.1868	0.2151	0.008	0.0115	0.0737	0.0621	-0.075
#12	-0.112	0.1203	0.1294	0.1262	0.1523	0.0611	0.0236	0.0054	-0.157	-0.044	0.0311	0.1411	0.1331	0.4427	0.3024	0.1606	-0.012	0.1672	0.1216	0.0877
#13	0.097	0.0916	0.1368	0.1504	0.2577	0.0009	-0.037	-0.111	0.0012	-0.212	0.1531	0.0354	0.1715	0.403	0.1414	0.1328	0.0187	0.0865	0.0401	0.0331
#14	-0.013	0.0819	-0.008	0.2445	0.0636	-0.03	0.1079	0.1848	0.0711	-0.045	0.1858	0.0766	0.1297	0.4054	0.1893	0.1553	0.0687	0.1219	0.082	0.0831
#15	0.1188	0.022	-0.035	0.0759	0.2209	0.0403	0.1365	-0.127	-0.084	0.1263	0.0335	-0.019	0.2983	0.3079	0.3303	-0.137	0.0356	0.0547	0.0702	0.0182
#16	0.1941	0.0226	0.0536	0.092	0.3552	-0.089	0.0601	0.0738	0.0548	-0.037	0.0299	0.0458	0.2338	0.211	0.2713	0.2301	0.0818	0.0553	0.073	0.105
#17	0.0261	0.078	0.1499	0.1512	0.1812	-0.061	-0.109	0.0152	0.0145	-0.01	0.1796	0.3059	0.2386	0.3756	0.1109	0.2257	0.0277	0.1712	0.0747	-0.042
#18	0.1038	0.0266	0.0139	0.2696	0.094	0.1748	0.028	-0.135	-0.064	0.0927	0.0129	0.1604	0.0919	0.1551	0.3515	0.2142	-0.023	0.0911	0.2162	0.1353
#19	0.1034	0.1113	0.0463	0.3489	0.3041	0.0121	0.0787	0.036	-0.143	0.1313	0.1478	0.1473	0.0911	0.2969	0.1609	0.0719	0.0244	0.0205	0.0559	0.012
#20	0.1088	0.0618	-0.011	0.2418	0.1674	-0.097	-0.157	-0.09	-0.01	-0.046	0.0526	0.1335	0.2715	0.113	0.1309	0.1172	0.0234	0.0351	0.1107	-0.101
#21	0.1294	0.1183	0.1433	0.0765	0.2279	0.05	0.0765	0.1159	-0.133	-0.185	0.1255	0.1334	0.141	0.4413	-0.066	0.0423	0.0875	0.1337	0.0908	0.0636
#22	0.2436	0.0044	0.0181	0.2177	0.3789	-0.003	-0.04	-0.002	-0.055	0.0248	0.2198	0.0625	0.0924	0.4527	0.1971	0.1878	0.0469	0.011	0.0103	0.1259
#23	0.1172	0.1768	0.0353	0.0603	0.0917	-0.067	0.1265	0.0096	-0.023	-0.064	0.2362	0.0779	0.1845	0.237	0.1609	0.0788	0.1225	-0.09	0.0077	-0.033
#24	-0.028	0.0562	0.0592	0.2921	0.3106	0.0649	-0.034	0.058	-0.085	-0.077	0.139	0.1855	0.2905	0.3576	0.0986	0.1129	-0.133	0.0109	0.0252	-0.078
#25		0.2384	0.1744	0.1922	0.3355		0.1343	0.0188	0.0064	0.113		0.127	0.1224	0.2876	0.323		-0.069	0.202	0.0467	0.1618
#26		-0.017	0.1763	0.3272	0.1463		0.0374	-0.087	0.0309	0.0397		0.2295	0.1821	0.2656	0.3418		0.1099	0.2794	0.2562	-0.013
#27		-0.007	0.0166	0.1511	0.3778		-0.006	-0.045	-0.035	0.1247		-0.004	-0.002	0.3611	0.2369		0.1447	0.1874	0.015	0.0816
#28		0.109	-0.018	0.1679	0.0699		0.2028	0.0701	-0.017	-0.033		0.0773	-0.053	0.1891	0.2191		0.0313	-0.057	0.1041	0.0495
#29		0.0652	0.0911	0.085	0.297		0.0002	-0.016	0.0182	0.0167		0.0642	0.0996	0.1836	0.2264		0.1182	0.0501	0.0721	0.0009
#30		-0.052	-0.104	0.0694	0.3911		-0.066	0.0571	0.1325	-0.041		-0.001	-0.053	0.2554	0.2762		-0.062	0.0625	0.1008	-0.042
#31		0.023	-0.008	0.0325	0.2022		-0.047	-0.023	0.1614	-0.035		0.1049	0.2109	0.1258	0.1935		0.1314	0.0382	0.0581	0.0329
#32		-0.019	0.05	0.1954	0.1598		-0.106	0.0772	0.0104	-0.052		0.1624	0.2401	0.6349	0.1909		-0.087	0.0097	0.0673	-0.021
#33		0.1656	0.1182	-0.052	0.1976		0.037	0.0935	0.0601	0.1013		0.1251	0.1017	0.3004	0.4331		0.0976	-0.135	0.1115	0.1327
#34		0.0528	0.0269	0.2609	0.4533		-0.082	0.0886	0.0841	-0.072		-0.003	0.0627	0.3038	0.4122		0.0038	0.1941	-0.103	-0.009
#35			0.1459	0.1204	0.2234		-0.009	0.0173	-0.012	0.0196		0.0853	0.0052	0.4076	0.1993		0.0233	-0.04	0.14	0.0315
#36			0.1926	0.2405	0.1987		0.1243	-0.082	0.1603	-0.045		0.0466	-0.023	0.2987	0.2698		0.0935	0.1559	0.0123	0.1217
#37			0.1239	0.0979	0.481		0.0627	-0.054	-0.048	-0.116		0.0635	0.2059	0.2822	0.3836			0.2107	0.0256	0.0823
#38			0.0137	0.0906	0.1611		-0.034	0.0005	0.0021	-0.047		-0.021	0.0699	0.0933	0.2137			0.0039	0.2121	-0.07
#39			-0.014	0.0559	0.2847		-0.072	-0.181	0.0629	-0.048		0.002	0.1314	0.2607	0.3155			-0.014	0.0429	-0.058
#40			0.0496	0.1063	0.248		0.1408	0.0376	0.0428	-0.139		0.0587	0.2361	0.198				0.0013	0.0074	0.0859
#41			0.2946	0.2632	0.111		-0.034	-0.026	-0.063	-0.074		0.0673	0.2173	0.3636				0.2194	0.0646	0.076
#42			0.0997	0.0939			-0.044	0.0437	-0.02	-0.063		0.0616	0.1247	0.406				-0.005	-0.04	0.068
#43			-0.003	0.108			-0.095	-0.059	-0.081	-0.028		0.1544	0.0816	0.2987				0.0544	0.1344	-0.041
#44			0.0651	0.0821			-0.072	0.1563	-0.079			0.0322	0.1232	0.276				0.2536	-0.027
#45			0.2865	0.004			0.0055	-0.047	-0.041			0.0496	0.0984	0.3026				0.0372	0.0444
#46			0.0851	0.128			-0.025	0.0705	-0.084			0.1343	-0.027	0.1385				0.1538	0.1471
#47			-0.049	0.05			0.1225	0.031	-0.055			0.1022		0.3472				-0.035	0.1445
#48			0.004				0.0214	0.1028	-0.055			-0.016		0.2503				-0.011	-0.035
									-0.011					0.2759
									0.1586					0.1532
									-0.028					0.2386
									0.0776					0.3639
									0.0884					0.3237
									0.014					0.1789
									-0.018					0.0431
									-0.03					0.2074
									-0.076					0.2475
									-0.058					0.0311
									0.0382					0.2313
									0.0544					0.0817
