# Supplementary material for: Neural circuit mechanisms for transforming learned olfactory valences into wind-oriented movement
Source: eLife. 2023 Sep 18;12:e85756. doi: 10.7554/eLife.85756 (PMC10588983; doi:10.7554/eLife.85756)
Supplement: Figure 1—source data 7. [file elife-85756-fig1-data7.xlsx]

## Sheet: Sheet1
Data type	Turn			Turn			Turn			Turn			Turn			Forward walking			Forward walking			Forward walking			Forward walking			Forward walking
Genotype	w;w,20xUAS-CsChrimson-mVenus; +/Empty-split-GAL4			w;w,20xUAS-CsChrimson-mVenus; MB109B/MB315C			w;w,20xUAS-CsChrimson-mVenus; +/MB312C			w;w,20xUAS-CsChrimson-mVenus; +/MB213B			w;w,20xUAS-CsChrimson-mVenus; +/MB043C			w;w,20xUAS-CsChrimson-mVenus; +/Empty-split-GAL4			w;w,20xUAS-CsChrimson-mVenus; MB109B/MB315C			w;w,20xUAS-CsChrimson-mVenus; +/MB312C			w;w,20xUAS-CsChrimson-mVenus; +/MB213B			w;w,20xUAS-CsChrimson-mVenus; +/MB043C
AverageInitial	Mean	confidence interval	N	Mean	confidence interval	N	Mean	confidence interval	N	Mean	confidence interval	N	Mean	confidence interval	N	Mean	confidence interval	N	Mean	confidence interval	N	Mean	confidence interval	N	Mean	confidence interval	N	Mean	confidence interval	N
-180	-3.0167	2.5054	74	-0.168	1.6433	138	0.188	2.0625	148	4.7947	3.3827	116	-20.0061	12.7588	29	0.2101	0.0585	74	0.2439	0.0462	136	0.2051	0.0407	148	0.4223	0.0776	116	0.953	0.2295	29
-179	-3.1016	2.4424	76	-0.1689	1.68	135	0.9196	2.075	150	5.9876	3.1471	116	-20.7206	13.2021	28	0.2044	0.0571	76	0.2404	0.0456	138	0.2069	0.0409	150	0.4053	0.0763	116	0.9796	0.2362	28
-178	-3.143	2.4748	75	-0.3599	1.7082	132	0.6191	2.0693	148	5.7367	3.1647	116	-19.2781	13.6185	27	0.2072	0.0578	75	0.2458	0.0465	135	0.2073	0.0415	148	0.4095	0.0763	116	1.011	0.2429	27
-177	-3.8542	2.5572	76	-0.0548	1.6617	129	0.7258	2.0075	151	4.79	3.3591	115	-12.6252	14.224	27	0.234	0.0622	76	0.2422	0.047	132	0.2012	0.0407	151	0.414	0.0768	115	0.99	0.2359	27
-176	-3.8526	2.5572	76	0.389	1.6432	129	0.7894	2.0215	150	5.4178	3.2447	117	-3.0588	15.0955	28	0.234	0.0622	76	0.2251	0.0468	129	0.2029	0.0409	150	0.4199	0.0766	117	1.0398	0.2365	28
-175	-2.1493	3.0448	77	0.5366	1.6551	129	0.7468	2.0229	150	6.0598	3.2046	117	-3.0588	15.0955	28	0.2587	0.0662	77	0.202	0.0425	129	0.2028	0.041	150	0.4164	0.0766	117	1.0398	0.2365	28
-174	-2.2043	3.1263	75	0.4605	1.6801	127	1.2961	2.0757	147	5.9816	3.237	116	-4.4018	16.2304	26	0.2654	0.0678	75	0.2394	0.0556	129	0.2032	0.0417	147	0.4394	0.079	116	1.1003	0.251	26
-173	-2.3577	3.0908	76	0.3022	1.6888	127	1.9609	2.0543	150	6.1208	3.1637	120	-4.4018	16.2304	26	0.3275	0.0911	76	0.233	0.0561	127	0.205	0.0413	150	0.4366	0.0766	120	1.1003	0.251	26
-172	-1.8198	3.1551	73	0.0524	1.6099	128	1.6607	2.06	150	6.0594	3.1118	122	-4.4018	16.2304	26	0.3185	0.093	73	0.2342	0.0561	127	0.2053	0.0413	150	0.4129	0.0737	122	1.1003	0.251	26
-171	-2.5942	3.0287	74	0.0288	1.6098	128	2.3709	2.1558	152	6.3227	3.0976	123	-4.4018	16.2304	26	0.3444	0.0937	74	0.2261	0.0554	128	0.2048	0.0408	152	0.4189	0.0734	123	1.1003	0.251	26
-170	-1.8641	3.0335	71	0.4545	1.6492	127	2.8599	2.1561	154	5.8121	3.0447	122	-4.4018	16.2304	26	0.3273	0.0936	71	0.2259	0.0554	128	0.2051	0.0403	154	0.4075	0.0727	122	1.1003	0.251	26
-169	-1.8711	3.0334	71	0.458	1.6295	128	2.8949	2.1844	152	6.3654	3.0544	120	-2.023	15.2165	28	0.3273	0.0936	71	0.2704	0.0677	127	0.2078	0.0408	152	0.4145	0.0738	120	1.0915	0.2375	28
-168	-2.0405	3.0791	70	0.7563	1.5593	128	2.9123	2.1988	151	6.3213	3.0293	121	-2.023	15.2165	28	0.3789	0.104	70	0.2692	0.0672	128	0.2092	0.041	151	0.4111	0.0732	121	1.0915	0.2375	28
-167	-2.0173	3.0355	71	0.6411	1.5626	131	2.3092	2.1224	150	6.9674	3.0354	122	-1.1007	15.7619	27	0.3736	0.1027	71	0.2599	0.0671	128	0.2131	0.0416	150	0.4211	0.0731	122	1.1298	0.2433	27
-166	-1.993	2.9932	72	0.6495	1.5746	130	2.7203	2.1009	146	7.7339	3.0916	125	-1.0311	14.6567	29	0.3684	0.1014	72	0.2905	0.0702	131	0.2042	0.0415	146	0.4179	0.0716	125	1.0455	0.2347	29
-165	-1.4466	3.0283	70	0.3584	1.5969	130	2.7796	2.1439	143	7.939	3.1167	124	-0.9975	15.1898	28	0.3529	0.102	70	0.2927	0.0707	130	0.1949	0.0418	143	0.43	0.0722	124	1.083	0.2401	28
-164	-1.4466	3.0283	70	0.4687	1.6184	128	3.2506	2.1447	146	9.5089	3.1881	126	-1.7613	15.166	28	0.3529	0.102	70	0.3379	0.0741	130	0.2077	0.0422	146	0.4119	0.0694	126	1.043	0.2381	28
-163	0.945	2.454	71	0.4981	1.6178	128	3.1905	2.1308	147	9.2009	3.2076	125	-1.7613	15.166	28	0.3402	0.0998	71	0.3428	0.0752	128	0.2054	0.042	147	0.3951	0.068	125	1.043	0.2381	28
-162	1.0368	2.4876	70	0.8337	1.6464	129	3.6305	2.0992	146	9.2606	3.1592	127	3.5608	15.2137	29	0.3208	0.0993	70	0.3447	0.0751	128	0.2063	0.0423	146	0.3893	0.067	127	1.0961	0.2298	29
-161	0.5829	2.4937	71	0.6805	1.6939	125	3.9575	2.0909	149	9.5639	3.2272	124	3.5608	15.2137	29	0.3263	0.0983	71	0.3471	0.0746	129	0.2219	0.0452	149	0.3949	0.0685	124	1.0961	0.2298	29
-160	0.5829	2.4937	71	0.4041	1.7209	125	4.2078	2.1009	148	10.4505	3.2509	124	10.6424	13.8468	29	0.3263	0.0983	71	0.3546	0.0768	125	0.215	0.0448	148	0.4237	0.0795	124	1.0185	0.2162	29
-159	0.5663	2.4589	72	0.3372	1.706	126	4.2069	2.1009	148	11.2648	3.2985	120	13.0444	13.9888	29	0.3219	0.097	72	0.3664	0.0771	125	0.215	0.0448	148	0.3879	0.0754	120	1.1191	0.2226	29
-158	-0.3982	2.61	73	0.5293	1.7075	127	4.1322	2.1428	145	12.0794	3.2463	118	13.0444	13.9888	29	0.324	0.0957	73	0.3639	0.0765	126	0.215	0.0456	145	0.3792	0.0748	118	1.1191	0.2226	29
-157	-0.409	2.61	73	0.7334	1.6715	126	4.325	2.1665	143	11.9899	3.3732	113	13.0444	13.9888	29	0.324	0.0957	73	0.3548	0.0757	127	0.2179	0.0462	143	0.3937	0.0779	113	1.1191	0.2226	29
-156	-0.409	2.61	73	0.4217	1.6727	128	4.2762	2.1368	145	11.1528	3.3128	112	17.2856	13.7833	28	0.324	0.0957	73	0.3573	0.0768	126	0.212	0.0456	145	0.3839	0.0779	112	1.121	0.2256	28
-155	-0.4241	2.6463	72	0.1294	1.6986	128	4.2671	2.1221	146	11.9428	3.3256	113	17.2856	13.7833	28	0.3265	0.097	72	0.3586	0.0758	128	0.2106	0.0454	146	0.4316	0.084	113	1.121	0.2256	28
-154	-0.2735	2.6507	72	0.4985	1.6786	131	4.3996	2.1524	144	12.5138	3.3872	111	18.9937	13.4087	29	0.3188	0.0973	72	0.3589	0.0757	128	0.2138	0.0459	144	0.4541	0.0859	111	1.0964	0.2191	29
-153	0.1167	2.6134	72	0.4937	1.6787	131	4.3987	2.1376	145	13.346	3.3926	112	19.6429	13.8802	28	0.3189	0.0973	72	0.3713	0.0757	131	0.2168	0.0457	145	0.466	0.0854	112	1.1354	0.2234	28
-152	0.0309	2.5788	73	0.7807	1.6492	135	5.425	2.19	145	11.8514	3.3211	110	19.8788	14.4021	27	0.3145	0.0961	73	0.3702	0.0758	131	0.2133	0.041	145	0.4692	0.0868	110	1.1425	0.2317	27
-151	0.0357	2.7294	69	0.5427	1.6442	134	5.5518	2.1781	146	12.065	3.3215	110	19.4313	14.9599	26	0.3327	0.1012	69	0.372	0.0737	135	0.2367	0.047	146	0.4697	0.0868	110	1.1146	0.2391	26
-150	-0.8961	2.8133	71	0.5621	1.6566	133	5.6532	2.1561	147	13.1766	3.3713	111	20.282	15.5455	25	0.3332	0.0986	71	0.3636	0.0738	134	0.2334	0.0467	147	0.4885	0.0866	111	1.1595	0.2444	25
-149	-0.8131	2.8567	70	1.5533	1.66	136	6.8478	2.1499	143	12.8473	3.2463	116	21.417	14.5205	27	0.3122	0.0989	70	0.3663	0.0743	133	0.2318	0.0474	143	0.4849	0.0832	116	1.1187	0.2298	27
-148	-1.113	2.8321	71	2.1853	1.6343	137	7.7848	2.0549	139	13.0647	3.3498	112	21.634	13.994	28	0.3633	0.11	71	0.3563	0.0728	136	0.2293	0.0481	139	0.497	0.085	112	1.0984	0.2224	28
-147	-1.1684	2.793	72	2.1968	1.5831	140	8.7299	1.9749	139	12.5378	3.3019	115	23.5312	13.6355	29	0.3832	0.1103	72	0.362	0.0723	137	0.2378	0.0488	139	0.5017	0.0842	115	1.1342	0.2175	29
-146	-1.2168	2.8732	70	1.9266	1.5664	141	9.4941	1.9848	134	12.4292	3.2751	116	25.8182	13.3702	30	0.3938	0.1132	70	0.3526	0.0706	140	0.243	0.0505	134	0.4974	0.0836	116	1.139	0.2102	30
-145	-1.3875	2.91	69	2.3326	1.5367	146	9.4442	1.9707	135	12.7096	3.2914	115	26.2587	12.9392	31	0.3792	0.1139	69	0.3522	0.0701	141	0.2514	0.0508	135	0.5014	0.0842	115	1.1071	0.2058	31
-144	-1.3636	2.8682	70	2.7085	1.5659	146	9.65	1.9753	136	12.9833	3.2617	117	28.3562	12.2586	33	0.3738	0.1124	70	0.3743	0.0734	146	0.2638	0.0509	136	0.5036	0.0828	117	1.1204	0.1957	33
-143	-1.3855	2.91	69	2.6383	1.5347	149	9.8992	2.0568	130	13.7684	3.2549	120	28.3562	12.2586	33	0.3793	0.1139	69	0.4183	0.0825	146	0.2642	0.0523	130	0.539	0.0859	120	1.1204	0.1957	33
-142	-1.4777	2.9112	69	2.6871	1.5162	151	9.9777	2.0713	129	13.5271	3.2159	126	29.2464	12.6145	32	0.414	0.1166	69	0.4099	0.081	149	0.2663	0.0526	129	0.6153	0.0935	126	1.1554	0.1986	32
-141	-1.8302	2.8845	69	2.6824	1.5255	150	10.3491	2.1032	127	13.5241	3.216	126	29.2464	12.6145	32	0.4	0.1164	69	0.4128	0.08	151	0.2857	0.0542	127	0.6153	0.0935	126	1.1554	0.1986	32
-140	-2.0968	2.8943	69	3.0538	1.5262	153	9.9922	2.0467	131	13.4432	3.1926	126	36.707	11.6265	30	0.4046	0.1163	69	0.4157	0.0804	150	0.2814	0.0527	131	0.6035	0.0919	126	1.1145	0.192	30
-139	-2.9675	2.9823	65	3.0756	1.538	155	9.7777	2.0429	128	13.8773	3.197	127	40.7343	11.0089	30	0.4212	0.123	65	0.4084	0.079	153	0.284	0.0537	128	0.6134	0.0917	127	1.1045	0.1926	30
-138	-3.0966	3.1268	62	3.4206	1.5602	156	9.9449	2.033	130	13.4246	3.1302	126	41.3451	10.6654	31	0.4386	0.1285	62	0.4458	0.0813	155	0.2804	0.0529	130	0.6074	0.0918	126	1.1141	0.1865	31
-137	-2.7568	3.0959	63	3.4264	1.5503	157	9.9983	2.0318	130	14.1897	3.1723	127	46.3316	9.7475	30	0.4824	0.1338	63	0.4528	0.0808	156	0.2831	0.0528	130	0.6156	0.0912	127	1.1277	0.1923	30
-136	-2.1039	3.1163	64	3.91	1.5521	159	9.4771	2.0358	126	14.2552	3.1123	130	47.5584	9.1684	32	0.5095	0.1345	64	0.4632	0.0807	157	0.2787	0.054	126	0.6146	0.0898	130	1.1687	0.1951	32
-135	-2.1564	3.1657	63	3.7288	1.5478	160	9.9552	2.0798	124	14.8247	3.085	130	46.0331	8.6877	34	0.5174	0.1364	63	0.4569	0.0797	159	0.2966	0.0555	124	0.6086	0.0897	130	1.1245	0.1861	34
-134	-2.1247	3.116	64	3.8977	1.5545	160	10.0203	2.0578	126	14.7991	3.059	131	43.6947	8.7539	35	0.5093	0.1345	64	0.4577	0.0793	160	0.2978	0.0548	126	0.6139	0.0891	131	1.1311	0.1809	35
-133	-1.2161	2.9893	64	3.9903	1.5795	160	10.1151	2.0894	124	14.6271	3.0135	134	43.6947	8.7539	35	0.5021	0.1347	64	0.4578	0.0793	160	0.3024	0.0556	124	0.6342	0.0904	134	1.1311	0.1809	35
-132	-1.2024	2.943	65	5.4137	1.6402	162	10.2193	2.1041	123	13.8292	2.9237	133	43.6947	8.7539	35	0.4944	0.1329	65	0.4603	0.0792	160	0.3058	0.056	123	0.6231	0.0904	133	1.1311	0.1809	35
-131	0.1329	3.1849	66	5.3618	1.6014	166	10.5191	2.0582	127	14.1167	2.9157	134	43.6947	8.7539	35	0.5641	0.1416	66	0.4556	0.0782	162	0.3006	0.0544	127	0.6305	0.09	134	1.1311	0.1809	35
-130	0.4265	3.2463	65	5.2843	1.5797	169	10.9081	2.1294	126	14.5769	2.9277	135	41.8603	8.8152	34	0.5731	0.1435	65	0.4498	0.0765	166	0.3219	0.0571	126	0.6616	0.0916	135	1.0557	0.1693	34
-129	0.8844	3.3352	64	5.3876	1.5875	168	11.0426	2.1159	126	14.5854	2.8891	137	43.1428	8.9898	33	0.6716	0.1664	64	0.433	0.074	169	0.3132	0.0559	126	0.6708	0.0909	137	1.0877	0.1714	33
-128	0.8847	3.3352	64	5.8177	1.5562	169	11.3826	2.1663	123	14.4858	2.8698	138	42.4568	8.2475	36	0.6717	0.1664	64	0.4361	0.0743	168	0.3257	0.0584	123	0.666	0.0903	138	1.0654	0.1585	36
-127	0.8787	3.3352	64	5.6729	1.5647	167	10.8609	2.0869	122	13.9934	2.8487	136	40.3871	8.2151	35	0.6717	0.1664	64	0.4718	0.0842	169	0.3085	0.0581	122	0.6729	0.0916	136	1.0278	0.1584	35
-126	1.0128	3.2861	65	5.3207	1.583	168	10.3532	2.0496	122	14.5121	2.8418	137	40.4208	8.2178	35	0.6611	0.1641	65	0.4776	0.0851	167	0.3082	0.0581	122	0.6935	0.0915	137	1.0074	0.1616	35
-125	1.0086	3.2862	65	4.6884	1.6549	167	10.5455	2.062	121	15.6305	2.8599	139	37.7067	8.0954	37	0.6611	0.1641	65	0.491	0.0857	168	0.3151	0.0585	121	0.7319	0.0935	139	1.057	0.1583	37
-124	1.0086	3.2862	65	5.1829	1.7046	163	10.4393	2.0256	123	14.0541	2.8212	140	36.529	7.8131	39	0.6611	0.1641	65	0.5004	0.0861	167	0.3309	0.0593	123	0.714	0.0932	140	0.9936	0.1672	39
-123	1.0622	3.4463	62	5.3731	1.6927	163	10.8191	2.0052	128	14.0488	2.8203	140	36.3	7.6187	40	0.6925	0.1711	62	0.5123	0.088	163	0.3503	0.0602	128	0.6923	0.0918	140	1.0041	0.1633	40
-122	0.9121	3.4499	62	4.1589	1.8233	165	11.2802	2.0023	130	13.9155	2.7687	143	33.0521	8.3556	44	0.6966	0.1709	62	0.5079	0.088	163	0.3541	0.0594	130	0.6867	0.09	143	1.025	0.157	44
-121	0.6049	3.4792	63	4.4766	1.7965	165	11.2131	1.9881	131	14.4072	2.7951	143	33.0521	8.3556	44	0.7968	0.1862	63	0.5013	0.0864	165	0.3516	0.059	131	0.6912	0.0898	143	1.025	0.157	44
-120	1.2933	3.4929	64	4.803	1.8237	164	11.0795	1.9978	131	13.9743	2.8029	140	32.6258	8.1789	45	0.8212	0.1849	64	0.4971	0.0862	165	0.3563	0.059	131	0.6993	0.0916	140	1.0201	0.1536	45
-119	1.512	3.542	63	4.7481	1.8138	165	10.9071	1.9657	131	14.3791	2.7861	141	33.762	8.0795	46	0.8344	0.1873	63	0.508	0.0868	164	0.3546	0.0584	131	0.7208	0.0918	141	1.0624	0.1561	46
-118	2.5037	3.6246	64	4.7481	1.8138	165	10.9846	1.9794	130	15.1905	2.7411	144	34.2443	7.9204	47	0.8361	0.1844	64	0.5051	0.0863	165	0.3614	0.0588	130	0.7164	0.0902	144	1.0963	0.1564	47
-117	4.5898	3.6836	63	4.444	1.7933	168	11.1288	2.0163	127	16.0371	2.5544	146	32.6669	7.9323	46	0.8309	0.1859	63	0.5051	0.0863	165	0.3835	0.0604	127	0.7121	0.0892	146	1.0587	0.1552	46
-116	4.7427	3.8038	61	4.4034	1.7797	168	11.427	2.0108	128	16.1571	2.5611	147	27.0191	7.5498	47	0.8581	0.1911	61	0.5001	0.0849	168	0.381	0.06	128	0.7525	0.094	147	1.0092	0.1478	47
-115	2.6557	3.2091	61	4.2235	1.7644	169	12.4085	2.0477	128	16.1373	2.5786	146	28.4439	8.0422	50	0.8231	0.1904	61	0.5061	0.0852	168	0.3948	0.0601	128	0.7551	0.0946	146	0.9896	0.1393	50
-114	2.6557	3.2091	61	4.1845	1.7411	172	12.3738	2.0185	129	16.9518	2.5738	147	28.4439	8.0422	50	0.8231	0.1904	61	0.4745	0.0807	169	0.3985	0.0598	129	0.7844	0.0969	147	0.9896	0.1393	50
-113	3.4502	3.2732	60	3.699	1.8517	174	12.5791	2.0164	127	17.9156	2.6246	145	27.7214	7.9159	51	0.7728	0.18	60	0.4919	0.08	172	0.4041	0.0604	127	0.786	0.0981	145	0.9932	0.1366	51
-112	3.3853	3.1671	62	3.4914	1.8503	173	13.0635	1.9908	128	18.2946	2.6709	142	27.7214	7.9159	51	0.7769	0.1754	62	0.4892	0.0792	174	0.4003	0.06	128	0.8	0.0998	142	0.9932	0.1366	51
-111	3.48	3.1903	61	3.6949	1.834	175	12.5436	1.8531	127	18.2377	2.6452	145	27.7214	7.9159	51	0.7533	0.1779	61	0.4912	0.0796	173	0.4163	0.0607	127	0.8245	0.0994	145	0.9932	0.1366	51
-110	4.1297	3.1411	63	3.6335	1.8266	176	12.0067	1.8431	126	18.8905	2.6688	146	27.7214	7.9159	51	0.7704	0.1744	63	0.4872	0.0788	175	0.422	0.0612	126	0.8256	0.0988	146	0.9932	0.1366	51
-109	4.1563	3.1406	63	4.0628	1.8565	178	12.1002	1.8555	125	19.0033	2.6302	149	27.2761	8.041	50	0.8104	0.1761	63	0.4566	0.0738	176	0.4254	0.0616	125	0.8403	0.0994	149	0.9968	0.1369	50
-108	4.3875	3.183	62	4.1549	1.8477	179	11.9595	1.8304	128	18.9167	2.6299	153	27.4915	7.8847	51	0.7697	0.1741	62	0.4869	0.0747	178	0.4282	0.0606	128	0.8753	0.0982	153	1.0179	0.1359	51
-107	4.4659	3.2346	61	4.5503	1.8533	178	12.135	1.8461	127	18.644	2.6211	153	26.9794	7.7486	52	0.7823	0.1766	61	0.4854	0.0743	179	0.4427	0.0628	127	0.8765	0.0983	153	1.0289	0.1337	52
-106	4.5448	3.288	60	4.4958	1.8331	180	13.2471	1.9005	128	18.2791	2.5684	151	28.3603	7.869	51	0.7954	0.179	60	0.4652	0.0727	178	0.4552	0.0626	128	0.8909	0.0993	151	1.079	0.1321	51
-105	4.9013	3.2145	62	4.9071	1.828	181	13.0663	1.8838	130	18.844	2.5547	154	28.3603	7.869	51	0.8209	0.1779	62	0.4602	0.072	180	0.4561	0.0616	130	0.8934	0.0979	154	1.079	0.1321	51
-104	5.1317	3.1715	63	5.301	1.8104	185	12.674	1.8757	129	18.0351	2.5129	151	28.4055	7.451	54	0.8652	0.1806	63	0.4479	0.0714	181	0.4535	0.062	129	0.8941	0.0997	151	1.0235	0.1281	54
-103	4.6247	3.2186	61	4.9629	1.8198	186	12.6055	1.8365	132	17.9768	2.4955	152	28.4055	7.451	54	0.8796	0.186	61	0.4959	0.0791	185	0.4452	0.0607	132	0.8887	0.0992	152	1.0235	0.1281	54
-102	4.6247	3.2186	61	4.6179	1.7773	189	12.4637	1.7872	136	17.9675	2.5701	152	26.5953	7.5543	52	0.8796	0.186	61	0.5003	0.0787	186	0.4533	0.0617	136	0.9137	0.0989	152	1.0133	0.1313	52
-101	4.2934	3.3719	60	4.5876	1.7592	192	12.6252	1.7859	135	17.6015	2.51	156	26.5953	7.5543	52	0.8947	0.1885	60	0.4945	0.0776	189	0.4803	0.0687	135	0.9085	0.0967	156	1.0133	0.1313	52
-100	4.8657	3.3285	62	4.6472	1.7459	191	12.5731	1.7798	135	17.4942	2.4605	158	26.504	7.7033	51	0.8831	0.183	62	0.5051	0.0774	192	0.4831	0.0687	135	0.8825	0.0905	158	1.0131	0.1339	51
-99	4.9556	3.3823	61	4.9976	1.7483	193	12.4091	1.7483	139	17.21	2.45	160	25.6398	7.8094	50	0.8974	0.1854	61	0.4999	0.0778	191	0.482	0.0669	139	0.8785	0.0895	160	0.975	0.131	50
-98	6.3122	3.2494	59	4.6847	1.7641	192	12.5103	1.7377	140	17.0967	2.4111	163	24.457	7.3959	53	0.9197	0.191	59	0.499	0.077	193	0.4865	0.0665	140	0.9019	0.0893	163	0.9591	0.1253	53
-97	6.7859	3.3094	58	4.5423	1.7624	192	13.2451	1.7534	142	17.0157	2.3745	166	24.457	7.3959	53	0.9727	0.194	58	0.5051	0.0774	192	0.5128	0.0679	142	0.9107	0.0891	166	0.9591	0.1253	53
-96	6.7859	3.3094	58	4.8479	1.7024	198	13.7379	1.7881	141	17.1243	2.3176	173	23.6492	7.0582	56	0.9727	0.194	58	0.5054	0.0774	192	0.5259	0.0684	141	0.9264	0.0898	173	0.9468	0.1201	56
-95	6.7771	3.3097	58	4.9135	1.6684	202	14.0211	1.7983	141	16.3795	2.2773	175	23.5484	6.9435	58	0.9727	0.194	58	0.5052	0.0768	198	0.527	0.0684	141	0.8992	0.0884	175	0.9546	0.1161	58
-94	6.3789	3.1685	61	4.9391	1.6708	202	13.1186	1.8073	145	16.3296	2.2752	176	22.1918	6.6937	60	0.9599	0.1855	61	0.5092	0.0756	202	0.5356	0.0673	145	0.8979	0.0879	176	0.9716	0.113	60
-93	6.6027	3.2728	59	4.918	1.6472	206	13.059	1.7957	146	16.0666	2.243	179	22.2217	6.4825	62	0.9918	0.1905	59	0.5002	0.0751	202	0.5276	0.067	146	0.9186	0.0901	179	0.9989	0.1122	62
-92	6.8226	3.3222	58	4.8373	1.6573	204	12.4001	1.7613	144	16.1778	2.2528	178	19.5368	6.5171	65	1.0089	0.193	58	0.4981	0.0738	206	0.5157	0.0669	144	0.9221	0.0906	178	1.0413	0.1107	65
-91	6.7026	3.2676	59	4.9952	1.6276	208	12.4837	1.7939	141	16.0317	2.2293	180	19.0101	6.3322	67	0.9918	0.1905	59	0.4979	0.0745	204	0.501	0.0644	141	0.9241	0.0898	180	1.0455	0.1076	67
-90	8.0971	3.117	57	5.1028	1.63	208	13.0193	1.7807	144	15.9101	2.1755	183	17.9795	6.0455	71	1.0143	0.1964	57	0.5068	0.0735	208	0.5422	0.0672	144	0.9368	0.0894	183	1.0612	0.1046	71
-89	9.2255	3.2014	57	4.6	1.6303	205	12.3742	1.7529	145	15.9237	2.1909	181	18.5179	6.1678	70	1.0797	0.1968	57	0.5109	0.0735	208	0.5457	0.0668	145	0.9373	0.0904	181	1.0847	0.1055	70
-88	8.804	3.37	58	4.5357	1.6201	204	12.8865	1.802	145	15.3959	2.194	183	18.7166	6.0941	71	1.0569	0.1898	58	0.5261	0.0744	205	0.553	0.0668	145	0.935	0.0895	183	1.1101	0.1047	71
-87	9.0479	3.4207	57	4.5417	1.6491	200	12.6101	1.7625	147	15.911	2.1881	183	17.8889	6.1245	70	1.0439	0.1927	57	0.5272	0.0747	204	0.5567	0.0678	147	0.9595	0.0904	183	1.0954	0.1052	70
-86	8.8978	3.3645	58	4.4303	1.6562	200	12.4698	1.7552	148	16.1347	2.1768	184	16.0591	5.7581	74	1.0259	0.1902	58	0.5358	0.0761	200	0.5588	0.0673	148	0.9702	0.0899	184	1.1382	0.1051	74
-85	8.8978	3.3645	58	4.2185	1.6576	199	12.0018	1.7435	151	16.1887	2.1472	188	15.9871	5.6459	76	1.0259	0.1902	58	0.5529	0.0778	200	0.5514	0.0659	151	0.9648	0.0881	188	1.1407	0.1021	76
-84	9.3331	3.3364	59	3.8288	1.6482	199	11.3555	1.7401	153	16.054	2.1558	186	14.4916	5.58	76	1.0509	0.1886	59	0.5407	0.076	199	0.5351	0.0652	153	0.9684	0.089	186	1.1297	0.1014	76
-83	9.4875	3.3908	58	3.978	1.6236	203	11.5758	1.7244	156	15.4026	2.099	188	14.4631	5.4418	78	1.069	0.191	58	0.5087	0.0711	199	0.5472	0.0652	156	0.9535	0.0868	188	1.1177	0.0999	78
-82	9.1399	3.5252	57	4.1045	1.6114	205	11.6632	1.7156	157	15.3534	2.0733	185	15.0075	5.15	83	1.1091	0.1985	57	0.5449	0.0739	203	0.548	0.0648	157	0.9169	0.084	185	1.1185	0.0958	83
-81	9.448	3.6477	55	4.1132	1.6302	209	11.3702	1.7166	156	15.2038	2.0402	189	14.4443	5.0455	85	1.1492	0.2037	55	0.5476	0.0735	205	0.5466	0.0653	156	0.9113	0.0823	189	1.126	0.0937	85
-80	9.9636	3.6786	54	3.9873	1.6246	209	12.1539	1.7989	153	14.8785	2.0069	190	14.7	4.946	87	1.1646	0.2069	54	0.5588	0.0725	209	0.567	0.067	153	0.9097	0.0818	190	1.1385	0.092	87
-79	9.8886	3.6118	55	4.0362	1.5935	215	12.6435	1.7841	156	14.4602	1.9493	195	14.4533	4.9323	87	1.1658	0.2031	55	0.5633	0.0725	209	0.5792	0.0661	156	0.9271	0.0818	195	1.1411	0.0919	87
-78	9.8808	3.4325	58	3.7326	1.5679	217	13.2301	1.9268	157	14.4867	1.9258	198	12.9877	4.8381	90	1.2106	0.1991	58	0.54	0.0693	215	0.6065	0.0666	157	0.9363	0.0813	198	1.1281	0.0897	90
-77	11.0473	3.518	58	3.9706	1.5712	218	12.8385	1.917	160	14.0898	1.8853	199	12.8414	4.7383	92	1.2347	0.1972	58	0.5325	0.0686	217	0.6327	0.0679	160	0.9422	0.0808	199	1.1316	0.0879	92
-76	10.5565	3.5453	57	3.365	1.5531	221	12.546	1.9064	162	13.8018	1.8793	202	11.6997	4.7167	91	1.2174	0.1999	57	0.5289	0.0682	218	0.6308	0.0672	162	0.9496	0.0807	202	1.1085	0.0854	91
-75	10.1872	3.4338	59	3.4521	1.5575	220	12.1839	1.9226	161	13.6153	1.8705	204	11.9554	4.6766	92	1.1762	0.1952	59	0.539	0.0675	221	0.6549	0.0709	161	0.9549	0.0803	204	1.1231	0.0844	92
-74	10.5727	3.4768	60	3.2344	1.5308	226	12.1758	1.9392	159	13.081	1.8696	207	12.2065	4.6551	92	1.1903	0.1911	60	0.5374	0.0678	220	0.6711	0.072	159	0.9614	0.0793	207	1.1173	0.0845	92
-73	10.2725	3.3715	62	3.0331	1.5236	226	12.1065	1.9283	160	12.8274	1.8631	209	12.0879	4.6016	94	1.2009	0.185	62	0.5321	0.0666	226	0.667	0.0717	160	0.9722	0.0792	209	1.1187	0.0829	94
-72	10.4672	3.4718	63	2.4922	1.466	225	11.8758	1.9111	162	13.0815	1.8617	213	11.4843	4.551	96	1.2245	0.1814	63	0.5309	0.0666	226	0.6614	0.071	162	0.9662	0.078	213	1.1184	0.0821	96
-71	9.3308	3.3579	61	2.3876	1.483	223	11.729	1.9725	159	12.6527	1.8407	216	11.4463	4.504	97	1.1757	0.1818	61	0.5348	0.0671	225	0.6824	0.0719	159	0.9523	0.0778	216	1.1491	0.0869	97
-70	9.5271	3.3723	61	2.1569	1.4782	224	10.9572	1.9076	162	12.1349	1.7754	223	11.4304	4.4578	98	1.2291	0.184	61	0.546	0.0677	223	0.6803	0.0711	162	0.9478	0.0752	223	1.1705	0.0886	98
-69	9.3302	3.4602	59	1.9592	1.4964	223	11.3476	1.8816	165	11.9956	1.7524	228	10.938	4.3822	100	1.1729	0.1721	59	0.5555	0.0679	224	0.6981	0.0705	165	0.9664	0.077	228	1.1675	0.087	100
-68	9.3283	3.4603	59	1.7776	1.4865	221	10.8532	1.8478	169	11.7033	1.7415	231	10.9694	4.5194	98	1.1729	0.1721	59	0.5589	0.0682	223	0.6857	0.0696	169	0.9561	0.0763	231	1.2033	0.0879	98
-67	9.3357	3.3124	62	2.0064	1.489	223	10.9545	1.83	171	11.6126	1.7272	236	10.6431	4.4854	99	1.1336	0.1655	62	0.5239	0.0615	221	0.688	0.0687	171	0.9859	0.0761	236	1.1946	0.0874	99
-66	9.4855	3.4202	60	2.217	1.4767	223	10.5471	1.8327	174	11.0037	1.7119	240	10.1053	4.4987	98	1.1717	0.1688	60	0.5215	0.0609	223	0.6801	0.0677	174	0.9815	0.0762	240	1.2088	0.0872	98
-65	9.286	3.4963	61	2.546	1.4525	222	10.7983	1.852	173	10.1982	1.688	239	9.9579	4.466	99	1.2514	0.1701	61	0.522	0.0603	223	0.6867	0.068	173	0.9823	0.0759	239	1.1785	0.0858	99
-64	9.1542	3.4419	62	2.8186	1.4733	227	10.6558	1.8455	173	10.6206	1.6572	238	9.8318	4.4743	99	1.2313	0.1685	62	0.526	0.0605	222	0.7175	0.0724	173	1.0063	0.0763	238	1.209	0.0804	99
-63	8.0646	3.4633	64	2.1776	1.5469	228	9.8704	1.8354	174	10.5754	1.6415	243	10.0854	4.3905	101	1.2606	0.1714	64	0.5419	0.0602	227	0.7006	0.0716	174	1.0178	0.0758	243	1.2312	0.08	101
-62	8.3309	3.5083	63	2.9041	1.4686	225	9.5862	1.8081	176	10.6665	1.6523	241	11.425	3.8792	98	1.2766	0.1734	63	0.55	0.0599	228	0.7031	0.0709	176	1.027	0.0763	241	1.251	0.0801	98
-61	8.8974	3.5212	61	2.7602	1.4731	225	9.6183	1.8005	177	10.1747	1.6181	244	10.3851	3.7267	103	1.2036	0.1627	61	0.5584	0.0612	225	0.7101	0.0707	177	1.0181	0.0756	244	1.2756	0.0796	103
-60	8.4681	3.43	62	2.5946	1.458	230	9.5994	1.7893	178	10.0576	1.5945	248	9.5634	3.8089	103	1.2136	0.1674	62	0.5587	0.0612	225	0.7054	0.0704	178	1.0075	0.0747	248	1.2776	0.0795	103
-59	8.6069	3.4838	61	2.7475	1.4467	233	9.4742	1.793	176	9.7335	1.5898	250	7.7603	3.7108	106	1.2335	0.1689	61	0.5522	0.06	230	0.7074	0.0711	176	1.008	0.0752	250	1.2748	0.0763	106
-58	7.6673	3.4111	60	2.9794	1.4557	238	9.694	1.7753	179	9.6682	1.5729	251	7.4306	3.6485	107	1.2383	0.1717	60	0.5485	0.0593	233	0.704	0.0703	179	1.0229	0.0752	251	1.2761	0.0752	107
-57	6.5671	3.2545	60	2.9573	1.4706	237	9.5884	1.7747	179	9.6032	1.5699	253	8.5499	3.6801	111	1.2211	0.1728	60	0.5502	0.0591	238	0.693	0.0704	179	1.0353	0.0753	253	1.2936	0.0743	111
-56	6.5671	3.2545	60	2.8013	1.4558	238	9.3354	1.768	179	9.2079	1.5527	256	7.9541	3.6642	111	1.2211	0.1728	60	0.553	0.0594	237	0.7131	0.0709	179	1.0094	0.0727	256	1.3582	0.081	111
-55	6.1	3.2346	61	2.964	1.4766	239	9.0482	1.7297	181	8.8012	1.5391	262	5.1027	3.2734	112	1.2155	0.1701	61	0.549	0.059	238	0.7251	0.0711	181	1.0229	0.0726	262	1.3607	0.0805	112
-54	5.9909	3.1839	62	2.8112	1.4646	241	8.7686	1.7263	182	8.5279	1.5266	264	5.0043	3.2199	114	1.1959	0.1685	62	0.5613	0.0592	239	0.7542	0.072	182	1.0196	0.0718	264	1.382	0.0826	114
-53	5.6262	3.2152	61	3.1061	1.3712	243	8.8098	1.724	183	8.1393	1.4783	267	5.4964	3.2023	115	1.1969	0.1712	61	0.5544	0.0587	241	0.7695	0.0722	183	1.0415	0.0722	267	1.4036	0.0846	115
-52	5.7353	3.2679	60	3.01	1.3447	248	8.2668	1.7113	185	7.5906	1.4894	272	5.5501	3.1493	117	1.2165	0.1729	60	0.5591	0.0584	243	0.7964	0.0722	185	1.0507	0.0714	272	1.3872	0.0841	117
-51	5.7364	3.2678	60	2.7516	1.3397	249	7.9701	1.7033	186	7.2438	1.4778	273	5.7007	3.1261	118	1.2166	0.1729	60	0.5517	0.0574	248	0.7992	0.0723	186	1.0485	0.0712	273	1.3957	0.0838	118
-50	5.1085	3.329	58	2.2504	1.3293	252	8.3152	1.6927	188	7.1561	1.4599	276	6.1871	3.0716	121	1.214	0.1768	58	0.5671	0.0587	249	0.8011	0.0717	188	1.05	0.0706	276	1.3897	0.0822	121
-49	4.6421	3.2949	59	1.9258	1.3098	249	8.0253	1.6599	195	6.3768	1.4583	280	6.5662	3.0826	122	1.2575	0.1826	59	0.5818	0.0589	252	0.8045	0.0701	195	1.0622	0.0692	280	1.395	0.0822	122
-48	4.8404	3.1892	61	2.0123	1.3063	251	7.8773	1.6625	195	6.2215	1.4418	280	6.6198	3.028	124	1.2682	0.1775	61	0.5733	0.0588	249	0.8165	0.0703	195	1.0484	0.069	280	1.4523	0.0911	124
-47	4.8404	3.1892	61	1.9007	1.3065	252	7.6066	1.6495	197	5.8924	1.4329	282	5.6185	2.975	129	1.2682	0.1775	61	0.5813	0.0585	251	0.8148	0.0698	197	1.069	0.069	282	1.4661	0.0954	129
-46	5.3969	3.1232	63	1.9062	1.2822	258	6.8219	1.6146	196	5.9914	1.4167	286	5.1264	2.9409	130	1.2622	0.1726	63	0.5927	0.0586	252	0.8252	0.0708	196	1.08	0.0696	286	1.455	0.095	130
-45	5.0625	3.1929	61	1.7615	1.2704	259	6.9886	1.6034	197	5.1912	1.3721	291	4.3867	2.958	132	1.2516	0.1743	61	0.594	0.0575	258	0.8758	0.0802	197	1.076	0.0686	291	1.4592	0.0938	132
-44	4.7252	3.1854	61	1.3998	1.2539	259	6.9324	1.6004	196	5.2756	1.3297	303	3.7833	3.0221	130	1.2133	0.1698	61	0.5894	0.057	259	0.895	0.0826	196	1.0995	0.068	303	1.495	0.0934	130
-43	4.8665	3.1368	62	1.6097	1.2519	257	6.8978	1.607	197	5.2791	1.3185	309	2.9874	2.9892	133	1.1938	0.1682	62	0.5554	0.0508	259	0.9273	0.0825	197	1.1221	0.0683	309	1.5081	0.0931	133
-42	4.8665	3.1368	62	1.4325	1.2605	257	6.8967	1.7397	197	5.2573	1.2752	311	3.4262	2.9728	135	1.1938	0.1682	62	0.5557	0.0511	257	0.9322	0.0819	197	1.1295	0.069	311	1.5343	0.0957	135
-41	6.3493	3.0394	63	1.4759	1.2504	258	6.5287	1.7346	196	5.2651	1.2895	308	3.1401	2.8797	140	1.1961	0.1667	63	0.5697	0.052	257	0.9232	0.0805	196	1.1508	0.0696	308	1.523	0.0942	140
-40	5.8725	3.022	62	1.4719	1.2526	259	6.7855	1.7372	196	5.1638	1.2845	308	2.7554	2.8161	144	1.2769	0.1784	62	0.561	0.0511	258	0.9595	0.0819	196	1.1494	0.0696	308	1.5336	0.0929	144
-39	5.8725	3.022	62	1.2992	1.2459	258	6.8223	1.7224	197	5.0645	1.2644	312	2.7156	2.7778	146	1.2769	0.1784	62	0.5627	0.0509	259	0.9864	0.0828	197	1.1407	0.0691	312	1.547	0.093	146
-38	5.6932	2.979	63	1.4568	1.2489	259	6.7206	1.7288	196	4.8182	1.2627	310	2.5951	2.8686	145	1.3011	0.1772	63	0.5636	0.051	258	0.9858	0.0832	196	1.1402	0.0689	310	1.575	0.0948	145
-37	5.464	3.0185	62	1.4196	1.2321	264	5.2413	1.7739	198	4.7425	1.2448	316	2.8998	2.8635	147	1.2873	0.1795	62	0.5654	0.0508	259	0.9606	0.0829	198	1.1716	0.0692	316	1.5717	0.0941	147
-36	5.38	2.9714	63	1.4473	1.259	260	5.1285	1.7549	199	4.3726	1.2354	315	2.6691	2.8912	145	1.2669	0.1778	63	0.5577	0.05	264	0.9566	0.0825	199	1.1766	0.0686	315	1.6054	0.0966	145
-35	5.475	3.0181	62	1.4247	1.2657	257	4.85	1.6942	206	4.4738	1.2565	315	2.1719	2.8222	146	1.2873	0.1795	62	0.5807	0.0505	260	0.9379	0.0803	206	1.2022	0.0698	315	1.6077	0.0969	146
-34	5.969	3.1577	59	0.9901	1.2587	259	5.0211	1.7103	203	4.5638	1.2463	317	1.6145	2.8027	149	1.3306	0.1853	59	0.5767	0.0508	257	0.9478	0.0811	203	1.1971	0.0697	317	1.5814	0.0965	149
-33	5.4702	3.0809	61	1.2317	1.2783	256	4.5482	1.749	204	3.9216	1.2471	322	1.7023	2.799	151	1.3001	0.1807	61	0.5727	0.0505	259	0.959	0.0807	204	1.1994	0.0676	322	1.5683	0.0953	151
-32	5.4702	3.0809	61	1.1956	1.2643	261	4.3506	1.7221	209	4.0808	1.2405	326	2.2699	2.7427	149	1.3001	0.1807	61	0.5779	0.0508	256	0.9736	0.0802	209	1.1993	0.0669	326	1.5597	0.0963	149
-31	6.2354	3.0973	62	0.866	1.2619	262	4.2663	1.6984	212	4.2982	1.2311	331	2.106	2.7456	149	1.3306	0.1774	62	0.5773	0.05	261	0.9612	0.0794	212	1.1934	0.0665	331	1.5725	0.0974	149
-30	6.1889	3.0481	63	0.767	1.2541	263	3.8207	1.7167	207	3.8157	1.2089	331	1.7172	2.818	147	1.3246	0.1747	63	0.5614	0.0496	262	0.9486	0.0801	207	1.1854	0.0668	331	1.5777	0.0982	147
-29	5.0407	2.9598	63	1.0264	1.2465	264	3.9877	1.6986	210	3.8269	1.2118	331	1.3715	2.7637	147	1.2721	0.1751	63	0.5582	0.0494	263	0.9602	0.0796	210	1.1946	0.0667	331	1.5719	0.0983	147
-28	5.8178	2.8046	61	1.0779	1.2417	264	3.6208	1.6572	211	3.9043	1.2092	333	1.4336	2.7357	149	1.2533	0.1785	61	0.5548	0.0493	264	0.9674	0.0803	211	1.2115	0.0671	333	1.5824	0.0987	149
-27	5.8178	2.8046	61	1.0236	1.2433	263	3.8095	1.6464	215	3.7282	1.1995	334	0.2468	2.7961	154	1.2533	0.1785	61	0.5498	0.0493	264	0.9823	0.0792	215	1.2054	0.0665	334	1.5747	0.0968	154
-26	5.9214	2.8499	60	1.1433	1.2578	259	3.772	1.6314	217	3.7401	1.1909	337	0.1027	2.8469	150	1.2741	0.1803	60	0.5496	0.0495	263	0.9747	0.0787	217	1.1984	0.0661	337	1.5769	0.0988	150
-25	5.9214	2.8499	60	1.1971	1.2506	261	3.7804	1.6432	217	3.7402	1.1816	339	-0.7073	2.8	152	1.2741	0.1803	60	0.5422	0.0486	259	0.9847	0.0792	217	1.1939	0.0659	339	1.6084	0.0992	152
-24	5.5245	2.9034	58	1.2476	1.2295	265	3.9474	1.6643	213	3.4948	1.1763	345	-0.71	2.7968	152	1.275	0.184	58	0.5452	0.0484	261	1.0042	0.0802	213	1.1945	0.065	345	1.6286	0.0994	152
-23	4.3399	2.9452	60	1.37	1.2565	261	3.4819	1.6813	210	3.4882	1.1795	343	-0.6865	2.8172	151	1.2963	0.1786	60	0.5473	0.048	265	1.0174	0.0813	210	1.1993	0.0654	343	1.6334	0.0998	151
-22	5.5056	2.9411	59	1.2935	1.2606	261	3.3775	1.6861	209	3.5119	1.172	343	-1.5148	2.8708	146	1.2989	0.1768	59	0.5294	0.045	261	1.019	0.0817	209	1.2024	0.0654	343	1.6506	0.1023	146
-21	5.5056	2.9411	59	1.4112	1.2716	261	3.2186	1.6849	210	3.1541	1.1692	345	-1.718	2.8398	148	1.2989	0.1768	59	0.5272	0.0449	261	1.0259	0.0816	210	1.1989	0.0652	345	1.6639	0.1011	148
-20	5.6792	2.8968	60	1.3232	1.2728	261	2.3491	1.638	214	3.0941	1.166	346	-2.0918	2.858	146	1.3049	0.174	60	0.5215	0.0446	261	1.0119	0.0803	214	1.2175	0.0657	346	1.6638	0.1024	146
-19	5.6765	2.9464	59	1.071	1.2855	254	1.9232	1.6098	215	2.8984	1.1711	345	-2.8847	2.9112	146	1.3062	0.1769	59	0.5263	0.0447	261	1.0094	0.0804	215	1.2176	0.0655	345	1.6743	0.1024	146
-18	4.9289	3.0833	57	0.809	1.298	255	1.7126	1.5216	214	2.5976	1.1667	344	-2.4963	2.9114	144	1.2569	0.1764	57	0.5316	0.0459	254	1.0042	0.0806	214	1.2245	0.0658	344	1.6869	0.1032	144
-17	3.9224	3.0025	56	0.5516	1.288	257	1.4926	1.5341	213	2.1172	1.1629	347	-3.0809	2.8936	147	1.2683	0.1838	56	0.5302	0.0457	255	0.9833	0.0803	213	1.2264	0.0655	347	1.6937	0.1032	147
-16	3.5891	2.9682	57	0.7959	1.2863	258	1.3072	1.5048	218	1.988	1.1523	346	-3.3593	2.8398	150	1.2559	0.1809	57	0.5436	0.0488	257	0.9725	0.0787	218	1.2282	0.0653	346	1.7011	0.1007	150
-15	3.696	2.9713	57	0.9523	1.27	262	1.3628	1.5026	218	1.9888	1.1425	350	-4.1112	2.8573	150	1.3005	0.1796	57	0.5381	0.0486	258	0.9776	0.0797	218	1.2292	0.0646	350	1.7238	0.1011	150
-14	2.4454	2.974	56	0.9161	1.2718	263	1.3619	1.5026	218	1.9563	1.142	353	-3.922	2.8597	150	1.3338	0.1839	56	0.542	0.0479	262	0.9699	0.0797	218	1.2334	0.0643	353	1.7213	0.1013	150
-13	2.0832	3.1146	54	1.0411	1.2626	264	1.0041	1.5178	222	2.0022	1.1502	352	-4.1565	2.85	149	1.3401	0.1894	54	0.553	0.0474	263	1.0046	0.0815	222	1.2273	0.0639	352	1.7353	0.102	149
-12	1.7071	2.9135	53	0.9531	1.2554	266	0.7792	1.522	224	1.4438	1.1371	356	-3.6577	2.859	150	1.3278	0.1929	53	0.5504	0.0473	264	1.0369	0.0817	224	1.2493	0.0637	356	1.7469	0.1014	150
-11	1.7071	2.9135	53	0.8644	1.2559	267	0.5044	1.5148	223	1.2663	1.1357	356	-3.9265	2.8254	152	1.3278	0.1929	53	0.5443	0.0466	266	1.0328	0.0822	223	1.2675	0.0632	356	1.7259	0.0991	152
-10	0.9498	2.8689	53	1.1941	1.292	266	0.4614	1.5177	224	1.2088	1.1424	353	-3.5406	2.7852	155	1.2953	0.1893	53	0.5346	0.0465	267	1.0419	0.0824	224	1.2652	0.0639	353	1.728	0.0975	155
-9	0.9989	2.8157	54	1.3235	1.2736	268	0.0824	1.5204	221	1.0057	1.1377	354	-3.9256	2.8446	158	1.2723	0.1872	54	0.531	0.0463	266	1.0342	0.0835	221	1.2517	0.0628	354	1.7163	0.0961	158
-8	0.399	2.8022	55	1.3581	1.279	267	0.2074	1.5376	218	1.178	1.1343	357	-4.3019	2.7905	158	1.3055	0.1826	55	0.5328	0.0463	268	1.0345	0.0839	218	1.2735	0.0624	357	1.7095	0.0962	158
-7	-0.1236	2.973	51	0.8386	1.2799	270	0.0298	1.5448	216	1.1287	1.129	354	-4.3432	2.7564	160	1.3867	0.1921	51	0.5359	0.0464	267	1.0359	0.0847	216	1.2693	0.0629	354	1.716	0.095	160
-6	-0.1236	2.973	51	0.8552	1.2882	268	0.0651	1.536	216	1.0211	1.1177	357	-4.0475	2.7114	163	1.3867	0.1921	51	0.5324	0.046	270	1.0443	0.0845	216	1.2657	0.0619	357	1.7125	0.0933	163
-5	-0.0653	2.8102	50	0.9588	1.2586	274	-0.2454	1.4837	222	0.9406	1.1032	364	-3.7317	2.6844	165	1.3013	0.1911	50	0.5298	0.0461	268	1.0384	0.0839	222	1.2685	0.061	364	1.7278	0.0921	165
-4	-0.383	2.8254	50	0.5949	1.2188	271	-0.4384	1.4916	219	0.2717	1.1335	371	-4.054	2.6761	165	1.3587	0.1917	50	0.5164	0.0453	274	1.0191	0.0829	219	1.2524	0.0599	371	1.7307	0.092	165
-3	0.6458	2.6902	49	1.3944	1.1678	272	-0.4792	1.5037	216	0.2268	1.1417	365	-5.0887	2.739	163	1.3048	0.1847	49	0.4986	0.045	271	1.0418	0.0836	216	1.2523	0.0602	365	1.722	0.0931	163
-2	0.6458	2.6902	49	1.3695	1.1575	275	-0.7376	1.5103	213	0.5356	1.152	371	-5.5877	2.7673	163	1.3048	0.1847	49	0.4944	0.0448	272	1.0424	0.0848	213	1.2433	0.0596	371	1.7107	0.0932	163
-1	0.0701	2.698	50	1.572	1.1374	278	-0.7242	1.5155	214	0.5162	1.1586	374	-5.4482	2.8497	158	1.2937	0.1814	50	0.4837	0.0438	275	1.0783	0.0885	214	1.2548	0.0595	374	1.7092	0.0952	158
0	-0.1972	2.7117	49	1.5556	1.1197	277	-0.6813	1.5359	211	0.4881	1.1559	375	-4.9702	2.8198	158	1.3192	0.1828	49	0.4768	0.0435	278	1.0912	0.0894	211	1.2606	0.0594	375	1.7166	0.0952	158
1	-0.0029	2.6543	51	1.3555	1.1273	275	-0.7198	1.5352	211	0.4584	1.1531	375	-4.5715	2.8249	156	1.278	0.178	51	0.4919	0.0448	277	1.1073	0.0902	211	1.2584	0.0588	375	1.7108	0.0965	156
2	-0.0029	2.6543	51	0.9546	1.1122	275	-1.0167	1.5313	209	0.026	1.151	372	-4.9468	2.8108	157	1.278	0.178	51	0.4965	0.045	275	1.1081	0.091	209	1.2575	0.059	372	1.7182	0.0972	157
3	-0.045	2.7076	50	1.1529	1.0973	276	-0.8687	1.6051	211	-0.2268	1.1425	373	-6.2168	2.7293	154	1.3028	0.1798	50	0.4938	0.0441	275	1.1189	0.0906	211	1.2456	0.0588	373	1.7148	0.0986	154
4	-0.045	2.7076	50	1.2454	1.1065	274	-0.8812	1.6059	212	-0.1046	1.1413	372	-5.7412	2.7065	154	1.3028	0.1798	50	0.4946	0.044	276	1.1186	0.0905	212	1.2551	0.0588	372	1.6635	0.0975	154
5	2.3339	3.5539	51	1.2885	1.0893	274	-1.3869	1.617	209	-0.1462	1.1452	369	-4.8041	2.6973	153	1.2901	0.1767	51	0.492	0.0442	274	1.119	0.0912	209	1.2659	0.0594	369	1.6715	0.0977	153
6	2.3299	3.554	51	1.5289	1.1035	271	-1.5516	1.6387	205	-0.4501	1.1431	368	-4.8456	2.6902	155	1.2901	0.1767	51	0.4992	0.0457	274	1.113	0.0925	205	1.2601	0.0591	368	1.6444	0.0958	155
7	2.9244	3.5353	52	1.4389	1.1087	271	-2.0057	1.597	207	-0.9102	1.1472	368	-5.9268	2.7151	155	1.2918	0.1733	52	0.503	0.0461	271	1.0838	0.0919	207	1.251	0.0589	368	1.641	0.0949	155
8	2.9073	3.6053	51	1.2752	1.1314	269	-1.7665	1.616	204	-0.8139	1.1453	365	-6.5707	2.7296	155	1.2822	0.1765	51	0.4954	0.0459	271	1.0704	0.0929	204	1.2445	0.0592	365	1.6594	0.0942	155
9	2.8868	3.6057	51	1.3612	1.1325	268	-1.756	1.6232	203	-0.7785	1.1411	365	-6.65	2.7251	155	1.2906	0.1755	51	0.4985	0.0461	269	1.0635	0.0931	203	1.2266	0.0592	365	1.6579	0.0942	155
10	2.817	3.5364	52	1.5576	1.1214	268	-2.2415	1.6234	201	-1.13	1.1157	365	-6.8487	2.7183	156	1.2658	0.1738	52	0.486	0.0445	268	1.0872	0.0945	201	1.2308	0.0598	365	1.6679	0.0935	156
11	2.0057	3.8308	51	1.5988	1.1334	270	-2.3281	1.6503	199	-0.7548	1.1114	366	-7.0605	2.6534	158	1.2023	0.1634	51	0.4678	0.0434	268	1.0974	0.0953	199	1.2081	0.0598	366	1.7023	0.0939	158
12	0.9918	3.9551	50	1.3921	1.1443	271	-2.1073	1.6533	199	-0.8078	1.1005	364	-7.4972	2.6441	158	1.1992	0.1656	50	0.4659	0.0428	270	1.107	0.0963	199	1.2049	0.0601	364	1.6781	0.0915	158
13	0.9918	3.9551	50	1.2961	1.1359	269	-2.1301	1.6594	198	-1.0053	1.1143	364	-6.8382	2.7201	153	1.1992	0.1656	50	0.4638	0.0425	271	1.11	0.0967	198	1.2017	0.0599	364	1.668	0.0893	153
14	2.4909	4.2358	50	1.032	1.1649	264	-2.256	1.6781	198	-1.5236	1.1254	366	-8.2904	3.1037	152	1.1616	0.1671	50	0.4519	0.0423	269	1.1096	0.0962	198	1.1993	0.0586	366	1.6762	0.0896	152
15	1.7048	4.2257	51	1.0345	1.1775	261	-2.2447	1.7091	196	-1.4474	1.1417	359	-7.8183	3.1159	150	1.1524	0.164	51	0.4515	0.0427	264	1.0616	0.0899	196	1.2015	0.0595	359	1.6755	0.0906	150
16	1.0042	4.2176	52	1.0675	1.1881	258	-2.435	1.6899	199	-2.042	1.1826	350	-7.9936	3.089	151	1.157	0.1616	52	0.4474	0.0427	261	1.025	0.0873	199	1.1993	0.0601	350	1.7001	0.0912	151
17	-0.0674	4.2081	53	0.952	1.1796	261	-2.4876	1.7208	194	-2.3166	1.1898	349	-7.4987	3.1179	150	1.1594	0.1585	53	0.4527	0.0434	258	1.0217	0.0888	194	1.1914	0.0593	349	1.6785	0.0911	150
18	0.7163	4.2031	54	1.1678	1.1846	258	-2.8579	1.5825	195	-2.7557	1.2106	349	-8.0407	3.127	148	1.152	0.1558	54	0.4495	0.0431	261	1.0337	0.0892	195	1.1878	0.0588	349	1.6569	0.0891	148
19	-0.0818	4.1535	53	1.3058	1.181	260	-2.4779	1.5945	196	-2.636	1.213	348	-7.8275	3.222	144	1.1326	0.1582	53	0.4386	0.0423	258	1.0304	0.0882	196	1.1782	0.0588	348	1.6844	0.0904	144
20	-0.2309	4.1505	53	1.1295	1.1874	262	-2.7518	1.5924	195	-2.663	1.2199	346	-7.8612	3.2209	144	1.039	0.1425	53	0.4326	0.0419	260	0.9962	0.0875	195	1.1851	0.059	346	1.6587	0.0907	144
21	-0.2309	4.1505	53	1.1204	1.1812	263	-3.3142	1.6313	191	-2.6781	1.2335	342	-8.5914	3.2928	145	1.039	0.1425	53	0.434	0.0416	262	0.9919	0.0878	191	1.1953	0.0593	342	1.6524	0.0925	145
22	0.5429	4.2036	53	1.0276	1.1715	264	-3.6423	1.6386	193	-2.9119	1.2712	342	-8.6794	3.2523	144	0.9987	0.1385	53	0.4474	0.0424	263	0.9924	0.0869	193	1.1952	0.0594	342	1.6463	0.0913	144
23	0.5366	4.1251	54	0.9489	1.175	264	-3.011	1.5728	191	-3.1616	1.2926	334	-9.0542	3.212	144	0.9811	0.1371	54	0.4548	0.0428	264	1.0149	0.0871	191	1.1773	0.0589	334	1.644	0.0908	144
24	0.5435	4.2036	53	0.8402	1.1679	265	-3.2722	1.5807	188	-3.3428	1.2966	332	-8.5907	3.1797	146	0.9996	0.1384	53	0.4564	0.0426	264	1.0231	0.0882	188	1.1661	0.0586	332	1.6433	0.0884	146
25	-1.4949	4.2372	56	0.8703	1.1712	264	-3.3698	1.6147	183	-3.687	1.3057	327	-8.1755	3.2126	145	1.0618	0.1443	56	0.4329	0.0408	265	1.0385	0.0901	183	1.1525	0.0574	327	1.6598	0.0898	145
26	-1.8733	4.2977	55	0.9464	1.1704	264	-3.2968	1.6222	182	-4.0069	1.3108	329	-8.6777	3.2884	141	1.0713	0.1466	55	0.4407	0.0412	264	1.0317	0.0907	182	1.1606	0.0576	329	1.6896	0.0902	141
27	-1.1041	4.3942	54	0.6708	1.1529	265	-2.8775	1.5797	181	-3.9376	1.3024	324	-9.2407	3.3069	138	1.1654	0.1631	54	0.4573	0.0426	264	1.0424	0.0913	181	1.1525	0.058	324	1.6994	0.0917	138
28	0.4221	4.499	56	0.7597	1.1663	260	-2.8892	1.6059	176	-4.325	1.2869	327	-9.4786	3.3246	138	1.1175	0.1608	56	0.4515	0.0426	265	1.0408	0.0928	176	1.1608	0.058	327	1.7092	0.092	138
29	-0.5338	4.5025	55	0.9039	1.1824	255	-3.1207	1.6258	176	-4.961	1.3	322	-9.519	3.3244	138	1.0799	0.1634	55	0.4467	0.0433	260	1.057	0.0927	176	1.1753	0.0589	322	1.6943	0.0911	138
30	-1.257	4.4446	56	0.8925	1.1825	255	-3.1713	1.5937	180	-5.3026	1.3324	320	-9.3622	3.2656	139	1.1258	0.1678	56	0.4546	0.044	255	1.0601	0.0908	180	1.1817	0.0584	320	1.685	0.0907	139
31	-1.3505	4.6096	54	0.6382	1.1963	253	-3.3817	1.6012	177	-5.3104	1.3295	320	-9.7507	3.246	139	1.1545	0.1725	54	0.4549	0.044	255	1.0414	0.0919	177	1.1715	0.0586	320	1.6799	0.0912	139
32	-1.3505	4.6096	54	0.4122	1.1999	253	-3.4065	1.6101	176	-5.228	1.3329	317	-10.7735	3.252	138	1.1545	0.1725	54	0.4677	0.0458	253	1.027	0.0913	176	1.1553	0.0581	317	1.6653	0.0915	138
33	-1.8422	4.4577	56	0.2626	1.1876	256	-4.0593	1.6067	171	-5.4074	1.3235	317	-9.8583	3.2388	133	1.2151	0.1782	56	0.471	0.0459	253	1.0144	0.0931	171	1.1469	0.0582	317	1.6773	0.0931	133
34	-4.2295	4.6449	59	0.3469	1.1859	257	-4.2531	1.6393	168	-5.9319	1.3138	319	-10.0017	3.2194	134	1.2459	0.1749	59	0.4749	0.0461	256	1.0366	0.0943	168	1.1532	0.059	319	1.6686	0.092	134
35	-3.9079	4.5781	60	0.0582	1.2066	253	-4.1603	1.6195	169	-6.2464	1.3005	320	-10.5211	3.2965	131	1.2726	0.174	60	0.4737	0.0459	257	1.0355	0.0931	169	1.1599	0.059	320	1.6466	0.0915	131
36	-2.7843	4.5528	62	0.0714	1.2358	247	-4.0627	1.6179	169	-6.2649	1.303	318	-10.6144	3.3206	130	1.2425	0.1699	62	0.4698	0.046	253	1.0311	0.0933	169	1.1533	0.0594	318	1.6293	0.0918	130
37	-1.846	4.5709	61	-0.3977	1.2503	247	-3.8309	1.6031	170	-6.4763	1.2874	322	-10.937	3.3306	129	1.2001	0.173	61	0.4698	0.0467	247	1.0104	0.0922	170	1.1396	0.0588	322	1.6386	0.092	129
38	-2.3488	4.6195	60	-0.6663	1.2542	246	-3.8143	1.5937	171	-6.5286	1.2887	322	-11.2991	3.4428	131	1.1774	0.1744	60	0.4815	0.0484	247	1.0045	0.0919	171	1.1379	0.0593	322	1.6366	0.0913	131
39	-2.3488	4.6195	60	-0.9095	1.2124	242	-3.585	1.5569	175	-6.378	1.3006	318	-11.2727	3.4974	129	1.1774	0.1744	60	0.476	0.0484	246	0.9749	0.09	175	1.1477	0.0597	318	1.6134	0.0927	129
40	-3.2502	4.5775	61	-1.1153	1.1992	244	-4.047	1.5896	179	-6.6754	1.3153	317	-11.2727	3.4974	129	1.1752	0.1742	61	0.4756	0.049	242	0.9909	0.0892	179	1.1218	0.0592	317	1.6134	0.0927	129
41	-2.84	4.5217	62	-1.0817	1.2049	242	-4.3848	1.6113	176	-6.7949	1.3169	315	-10.5915	3.446	129	1.1598	0.1721	62	0.4802	0.0498	244	1.0085	0.0923	176	1.1096	0.0591	315	1.5948	0.0934	129
42	-2.4526	4.5075	62	-0.6629	1.1974	241	-5.032	1.5795	173	-6.7936	1.3172	316	-11.3437	3.4256	130	1.1945	0.174	62	0.4742	0.0495	242	1.0097	0.0938	173	1.0994	0.0586	316	1.5965	0.0931	130
43	-2.9025	4.5592	61	-0.5588	1.2083	237	-4.6091	1.5881	171	-6.3974	1.3315	312	-11.2406	3.4333	129	1.1489	0.1707	61	0.4859	0.0501	241	1.0168	0.0947	171	1.0912	0.059	312	1.6049	0.092	129
44	-2.6996	4.6312	60	-0.7267	1.2172	232	-4.4523	1.6096	168	-6.8099	1.3694	309	-11.9589	3.5398	127	1.1586	0.1732	60	0.4695	0.0469	237	1.0291	0.0964	168	1.0965	0.0595	309	1.6056	0.095	127
45	-3.0834	4.7098	59	-1.0205	1.2303	231	-4.6244	1.6042	170	-7.2505	1.3974	301	-11.5392	3.5054	129	1.1679	0.1753	59	0.4633	0.0476	232	0.9947	0.0921	170	1.1051	0.0607	301	1.565	0.093	129
46	-2.4375	4.7465	58	-1.0518	1.2207	229	-4.6567	1.586	172	-7.649	1.4321	300	-11.5452	3.5051	129	1.1434	0.1766	58	0.4695	0.0496	231	1.0067	0.0934	172	1.1012	0.0608	300	1.5702	0.0926	129
47	-2.1063	4.8187	57	-0.9106	1.2244	230	-4.384	1.5812	166	-7.5365	1.4247	299	-11.5573	3.4538	131	1.1509	0.1796	57	0.4626	0.0499	229	0.9733	0.0914	166	1.1024	0.0624	299	1.5402	0.0921	131
48	-2.1098	4.8187	57	-0.9694	1.2388	227	-4.3244	1.574	165	-7.5006	1.4292	294	-12.1164	3.4736	128	1.1389	0.1805	57	0.4719	0.05	230	0.9431	0.0915	165	1.0799	0.0624	294	1.5318	0.0933	128
49	-2.1098	4.8187	57	-0.6001	1.2684	223	-4.3445	1.5805	164	-7.381	1.4474	290	-12.3104	3.5076	127	1.1389	0.1805	57	0.4767	0.0507	227	0.9541	0.0919	164	1.0673	0.0631	290	1.5427	0.094	127
50	-1.246	4.7625	58	-0.6718	1.2469	225	-4.3099	1.5962	160	-7.6534	1.4733	283	-12.8908	3.5359	125	1.098	0.1788	58	0.4896	0.0515	223	0.9411	0.0921	160	1.0729	0.064	283	1.5259	0.0939	125
51	-1.3087	4.7618	58	-0.9814	1.2565	228	-4.4224	1.6252	157	-7.8062	1.4956	276	-12.5013	3.5134	121	1.0971	0.1789	58	0.4893	0.0514	225	0.9531	0.0935	157	1.0709	0.0646	276	1.5345	0.0968	121
52	-0.7833	4.9162	56	-1.1002	1.2458	230	-4.6216	1.6204	157	-8.1395	1.511	271	-13.3373	3.5904	121	1.0809	0.1846	56	0.4918	0.051	228	0.9521	0.0936	157	1.0584	0.0652	271	1.5483	0.0981	121
53	-0.2453	4.6903	59	-1.06	1.2628	226	-5.2495	1.7264	156	-8.3646	1.5151	271	-13.3164	3.6492	119	1.0664	0.1785	59	0.4882	0.0507	230	0.9637	0.0938	156	1.0513	0.0653	271	1.5364	0.0997	119
54	-0.2453	4.6903	59	-1.1068	1.2796	227	-4.9716	1.8709	154	-8.632	1.5551	264	-13.973	3.6918	117	1.0664	0.1785	59	0.4971	0.0515	226	0.9814	0.0966	154	1.0573	0.0665	264	1.5312	0.1013	117
55	-0.259	4.6903	59	-0.983	1.3119	222	-4.9119	1.9061	151	-9.0541	1.5953	257	-14.6243	3.77	113	1.0601	0.179	59	0.4891	0.0513	227	0.9695	0.096	151	1.0332	0.0672	257	1.5157	0.1046	113
56	-0.0087	4.6836	59	-1.3454	1.3303	223	-5.5777	1.9201	153	-8.4019	1.5762	253	-14.5819	3.7862	112	1.0114	0.1771	59	0.5012	0.0523	222	0.9569	0.0951	153	1.0222	0.0686	253	1.5066	0.1058	112
57	0.002	4.7651	58	-1.4659	1.4428	226	-5.3104	1.9083	153	-8.424	1.5809	258	-13.6255	3.7015	113	1.0229	0.1798	58	0.5022	0.052	223	0.9429	0.0951	153	1.0284	0.069	258	1.4916	0.1058	113
58	-0.6592	4.6547	60	-1.6364	1.4477	226	-5.3302	1.9208	152	-9.5803	1.5708	253	-12.9623	3.7079	111	1.0427	0.1776	60	0.4969	0.0515	226	0.949	0.0955	152	1.033	0.07	253	1.498	0.1076	111
59	0.6907	4.715	60	-1.5828	1.486	221	-5.8958	1.9087	152	-9.674	1.5691	249	-12.9623	3.7079	111	1.0868	0.1818	60	0.4985	0.0514	226	0.922	0.0883	152	1.0156	0.0701	249	1.498	0.1076	111
60	0.4729	4.7098	60	-1.6228	1.4964	219	-5.842	1.8843	154	-10.4041	1.6017	249	-13.1234	3.7382	110	1.0178	0.1751	60	0.5214	0.053	221	0.9129	0.0874	154	1.0153	0.0699	249	1.4919	0.1084	110
61	0.1921	4.6916	60	-1.9037	1.4899	223	-5.8627	1.8853	157	-10.5232	1.6125	246	-13.3163	3.8044	108	1.0502	0.1767	60	0.504	0.0518	219	0.8837	0.0842	157	1.008	0.0706	246	1.4995	0.1101	108
62	0.2377	4.6143	61	-1.7576	1.484	220	-5.869	1.8505	160	-10.9228	1.6463	245	-13.3673	3.9001	105	1.0331	0.1746	61	0.5011	0.0509	223	0.8718	0.083	160	1.0195	0.071	245	1.4762	0.1102	105
63	0.2377	4.6143	61	-1.6907	1.4939	219	-6.2104	1.7546	156	-10.7455	1.679	243	-13.2385	3.9356	104	1.0331	0.1746	61	0.4976	0.0516	220	0.8644	0.0836	156	1.0309	0.0712	243	1.4772	0.1112	104
64	0.2377	4.6143	61	-1.9506	1.4825	221	-6.3912	1.7704	153	-11.0718	1.6964	239	-14.4885	4.1359	102	1.0331	0.1746	61	0.5067	0.0525	219	0.85	0.0839	153	1.0181	0.0721	239	1.5217	0.1118	102
65	-1.4629	4.3585	58	-2.4259	1.4997	218	-6.2251	1.748	154	-10.9792	1.7224	235	-15.7262	4.291	100	1.0601	0.1826	58	0.5063	0.0521	221	0.8466	0.0837	154	0.9935	0.071	235	1.563	0.1171	100
66	-1.4733	4.4356	57	-2.8793	1.5019	218	-6.1423	1.748	154	-11.0159	1.7456	230	-16.2037	4.4162	96	1.0787	0.1849	57	0.4978	0.0504	218	0.835	0.0837	154	0.9913	0.0719	230	1.5835	0.1207	96
67	-2.0011	4.2423	59	-2.8866	1.5175	215	-6.1165	1.7653	152	-10.7999	1.7586	229	-15.3314	4.4664	94	1.019	0.1812	59	0.5064	0.0529	218	0.8495	0.0845	152	0.9849	0.0715	229	1.5692	0.1228	94
68	-2.0011	4.2423	59	-2.8295	1.52	214	-6.8287	1.7813	152	-10.8416	1.777	228	-15.3054	4.5287	93	1.019	0.1812	59	0.5273	0.0553	215	0.8589	0.0843	152	0.9928	0.072	228	1.5614	0.124	93
69	-2.124	4.1738	60	-3.1992	1.5421	214	-7.011	1.7685	154	-11.0313	1.7893	225	-15.6033	4.4265	95	1.0055	0.1788	60	0.5345	0.0557	214	0.8622	0.0839	154	1.0016	0.0727	225	1.5187	0.1231	95
70	-2.0485	4.1053	61	-3.428	1.5827	212	-6.8854	1.7679	154	-10.9148	1.7958	224	-16.8872	4.4825	92	0.9908	0.1764	61	0.5409	0.0568	214	0.8334	0.0823	154	0.9889	0.0718	224	1.5012	0.1269	92
71	-0.9874	4.0325	60	-3.5822	1.5934	207	-7.2428	1.7768	151	-11.3566	1.8202	217	-17.8037	4.657	88	0.9774	0.1789	60	0.5476	0.0574	212	0.8195	0.0827	151	0.997	0.0734	217	1.4337	0.1271	88
72	-0.4733	4.0679	59	-4.2116	1.6762	205	-7.453	1.7445	152	-11.2295	1.8381	216	-18.9385	4.7858	86	0.9633	0.1813	59	0.5469	0.0587	207	0.7833	0.0798	152	0.9957	0.0737	216	1.3934	0.1222	86
73	-0.477	3.9996	60	-4.1659	1.6604	207	-7.3378	1.7446	152	-11.0911	1.8603	212	-19.4301	4.7358	86	0.9472	0.179	60	0.5525	0.0605	205	0.7623	0.0792	152	0.9784	0.0746	212	1.4005	0.122	86
74	-2.5572	3.8533	58	-3.9139	1.6349	209	-7.3442	1.7304	151	-10.9087	1.8611	208	-16.9647	4.0914	85	0.9751	0.1841	58	0.545	0.0602	207	0.758	0.0797	151	0.9575	0.0758	208	1.4059	0.1233	85
75	-2.1849	3.8117	58	-4.1492	1.6438	210	-7.7257	1.6998	150	-10.8255	1.8538	209	-16.4286	4.0151	87	0.9636	0.1847	58	0.5332	0.0598	209	0.7693	0.0801	150	0.9492	0.0757	209	1.384	0.1215	87
76	-1.6221	3.8904	56	-4.229	1.6295	212	-7.4563	1.7055	149	-10.9088	1.8782	205	-16.6049	4.0403	85	0.9504	0.1906	56	0.5567	0.0621	210	0.7714	0.0805	149	0.9362	0.0748	205	1.3404	0.1201	85
77	-0.8843	3.8909	55	-4.198	1.6131	216	-7.6773	1.7026	148	-11.1722	1.9095	200	-15.5618	4.2366	84	0.9443	0.194	55	0.5422	0.0613	212	0.7657	0.0809	148	0.9186	0.0753	200	1.3604	0.1209	84
78	-1.6831	3.8792	54	-3.9738	1.5987	219	-7.7071	1.715	146	-10.9975	1.9186	200	-16.4962	4.1486	87	0.9478	0.1976	54	0.5353	0.0603	216	0.729	0.0797	146	0.8939	0.0743	200	1.3537	0.1169	87
79	-1.7069	3.953	53	-4.35	1.6227	214	-9.0135	1.7546	145	-11.5514	1.9075	202	-17.1525	4.1443	86	0.9656	0.2006	53	0.5262	0.0597	219	0.7352	0.0802	145	0.89	0.0737	202	1.3296	0.1157	86
80	-1.7448	4.0296	52	-4.4554	1.6411	212	-8.2815	1.8975	145	-11.9673	1.8981	201	-17.4076	4.3285	82	0.9857	0.2034	52	0.5331	0.061	214	0.7467	0.0802	145	0.8855	0.0738	201	1.3468	0.1187	82
81	-2.0761	3.9667	53	-4.7047	1.6553	209	-7.9628	1.8955	144	-11.8252	1.8827	203	-16.2066	4.2463	80	1.0882	0.2243	53	0.5606	0.0638	212	0.7295	0.0805	144	0.8851	0.0733	203	1.3105	0.1122	80
82	-2.8189	3.9001	53	-4.6685	1.6608	207	-7.5222	1.8783	143	-11.6114	1.8366	200	-17.818	4.5139	80	1.1506	0.2306	53	0.5497	0.0639	209	0.72	0.081	143	0.8751	0.0743	200	1.311	0.1122	80
83	-4.0218	4.0131	54	-4.7078	1.6981	201	-7.4731	1.9034	141	-11.6585	1.8347	200	-18.7689	4.5946	79	1.1768	0.228	54	0.5337	0.064	207	0.7018	0.0812	141	0.8759	0.0753	200	1.312	0.1136	79
84	-5.1489	4.0521	56	-5.0668	1.7181	197	-7.4123	1.8565	145	-11.6832	1.8543	196	-20.6346	4.6936	77	1.1416	0.2212	56	0.5358	0.0657	201	0.6859	0.0794	145	0.8762	0.0766	196	1.2617	0.1127	77
85	-3.3172	4.0303	53	-5.1141	1.7117	198	-7.5494	1.8477	145	-11.9001	1.8565	199	-21.3232	4.7075	76	1.0838	0.2254	53	0.5377	0.0669	197	0.6811	0.0796	145	0.8626	0.0756	199	1.2236	0.1073	76
86	-3.3172	4.0303	53	-5.7871	1.7688	199	-7.4378	1.8571	144	-12.3338	1.8627	195	-20.5131	4.7467	75	1.0838	0.2254	53	0.5284	0.0664	198	0.6837	0.0801	144	0.8462	0.0752	195	1.2434	0.1087	75
87	-4.0357	3.8613	55	-6.3022	1.8325	199	-7.3234	1.8622	144	-12.3892	1.897	191	-20.7513	4.7313	75	0.98	0.2071	55	0.5223	0.0657	199	0.6562	0.079	144	0.8297	0.0766	191	1.2448	0.1087	75
88	-3.9199	3.7405	57	-6.3335	1.7824	204	-7.5801	1.8733	146	-12.5366	1.9371	186	-22.042	4.6899	78	0.9598	0.2001	57	0.5373	0.066	199	0.6467	0.0778	146	0.7932	0.0769	186	1.2591	0.107	78
89	-4.4128	3.7303	58	-6.3018	1.7739	205	-7.4779	1.8535	146	-12.4122	1.949	183	-22.2771	4.8111	76	0.9637	0.1961	58	0.5248	0.0646	204	0.6558	0.0792	146	0.7778	0.0757	183	1.2629	0.1087	76
90	-3.8968	3.8463	56	-6.3154	1.7826	204	-8.4236	1.9774	145	-12.0635	1.9246	181	-22.5593	4.9761	73	0.916	0.1965	56	0.5277	0.0643	205	0.6377	0.0794	145	0.7603	0.0764	181	1.2694	0.1124	73
91	-3.8968	3.8463	56	-6.1232	1.7629	206	-8.3643	1.9973	144	-12.1957	1.9439	179	-22.6797	5.0443	72	0.916	0.1965	56	0.5269	0.0647	204	0.6429	0.0798	144	0.7687	0.077	179	1.2836	0.113	72
92	-3.8968	3.8463	56	-5.8673	1.7746	205	-8.4218	1.9959	145	-12.9816	1.984	178	-22.6701	5.1294	70	0.916	0.1965	56	0.5146	0.0626	206	0.647	0.0792	145	0.7721	0.077	178	1.2762	0.1105	70
93	-4.2613	3.9817	55	-5.7685	1.7824	204	-8.6455	2.0049	145	-13.2674	2.0185	176	-22.6701	5.1294	70	0.8598	0.1878	55	0.5244	0.064	205	0.6303	0.0781	145	0.7656	0.0777	176	1.2762	0.1105	70
94	-1.7403	3.6749	51	-6.0976	1.767	206	-8.4816	2.0028	145	-13.1902	2.083	169	-23.7629	5.2774	71	0.8201	0.1933	51	0.5153	0.0636	204	0.6179	0.0778	145	0.7469	0.0769	169	1.2494	0.1095	71
95	-2.2368	3.6631	51	-6.11	1.7466	209	-8.605	2.0429	141	-13.6861	2.161	161	-23.4802	5.34	70	0.7715	0.1892	51	0.5204	0.063	206	0.6005	0.0793	141	0.7405	0.0789	161	1.2528	0.1101	70
96	-3.5903	3.5761	49	-6.4048	1.703	218	-9.0852	2.0524	143	-13.5928	2.1907	158	-23.9085	5.4005	69	0.7891	0.1964	49	0.5311	0.0647	209	0.6281	0.0827	143	0.7357	0.08	158	1.2566	0.1116	69
97	-3.588	3.5761	49	-6.2783	1.6979	215	-9.1066	2.0662	142	-13.6499	2.2531	153	-23.5677	5.3337	70	0.7891	0.1964	49	0.5411	0.0645	218	0.6272	0.0832	142	0.7313	0.0819	153	1.2407	0.1112	70
98	-3.3748	3.3701	52	-6.0861	1.6942	216	-9.1006	2.0664	142	-13.8442	2.2873	150	-20.2005	5.8934	69	0.7567	0.1861	52	0.5233	0.0635	215	0.6273	0.0832	142	0.721	0.0816	150	1.2366	0.1108	69
99	-3.1171	3.1885	55	-6.1216	1.7098	214	-9.3723	2.1148	138	-13.6963	2.3021	151	-20.431	6.0523	67	0.7474	0.1779	55	0.5447	0.0662	216	0.6256	0.0852	138	0.7142	0.0813	151	1.2454	0.1138	67
100	-2.8547	3.1917	54	-6.0482	1.7279	211	-8.8396	2.1335	134	-13.3178	2.3105	149	-20.431	6.0523	67	0.7454	0.1781	54	0.5448	0.0667	214	0.5821	0.0843	134	0.7226	0.0819	149	1.2454	0.1138	67
101	-3.3271	3.2167	53	-6.0493	1.7175	213	-8.7805	2.1451	133	-13.3538	2.298	151	-20.7322	6.1371	66	0.7553	0.1813	53	0.5319	0.0664	211	0.5528	0.0797	133	0.7057	0.081	151	1.2643	0.1139	66
102	-3.2215	3.2201	53	-6.0997	1.7325	213	-8.8482	2.1603	132	-13.8077	2.342	149	-22.0213	6.4367	65	0.702	0.1773	53	0.5336	0.0659	213	0.5569	0.0802	132	0.6941	0.0815	149	1.2913	0.116	65
103	-3.2912	3.1606	54	-6.726	1.7638	214	-8.9889	2.1501	132	-13.6742	2.3997	148	-22.5428	6.8023	61	0.6897	0.1745	54	0.5283	0.0659	213	0.5568	0.0802	132	0.6919	0.0819	148	1.243	0.1175	61
104	-3.2912	3.1606	54	-6.7132	1.7794	212	-9.1565	2.2133	128	-12.9158	2.3338	149	-21.5348	6.9266	59	0.6897	0.1745	54	0.5278	0.0656	214	0.5542	0.0818	128	0.6635	0.0808	149	1.2273	0.1151	59
105	-3.2117	3.1563	54	-6.6385	1.7697	212	-9.1844	2.26	125	-12.6101	2.3238	149	-23.4532	7.3547	54	0.6627	0.1729	54	0.5331	0.0662	212	0.5496	0.0836	125	0.647	0.08	149	1.2544	0.1245	54
106	-3.2117	3.1563	54	-6.7379	1.8131	206	-9.16	2.2782	124	-12.1371	2.3187	144	-23.7035	7.3343	54	0.6627	0.1729	54	0.5135	0.0647	212	0.5188	0.0784	124	0.6209	0.0809	144	1.2339	0.1266	54
107	-3.2117	3.1563	54	-6.8438	1.8247	204	-9.16	2.2782	124	-14.1836	2.495	141	-24.2657	7.7549	51	0.6627	0.1729	54	0.5138	0.0662	206	0.5188	0.0784	124	0.633	0.0812	141	1.2686	0.1298	51
108	-3.2118	3.1563	54	-7.1387	1.8139	204	-9.0162	2.3269	121	-14.223	2.5374	138	-24.2657	7.7549	51	0.6626	0.1729	54	0.5172	0.0671	204	0.4999	0.0765	121	0.6235	0.082	138	1.2686	0.1298	51
109	-3.2118	3.1563	54	-7.4916	1.7642	210	-8.6307	2.2947	122	-14.151	2.5201	139	-26.3913	8.1975	50	0.6626	0.1729	54	0.5331	0.0697	204	0.4846	0.0757	122	0.6209	0.0815	139	1.239	0.13	50
110	-4.0681	3.2147	52	-7.8003	1.7476	207	-8.7758	2.28	123	-14.0782	2.5031	140	-27.6992	8.4883	48	0.6818	0.1791	52	0.5144	0.068	210	0.4705	0.075	123	0.6165	0.081	140	1.2164	0.1345	48
111	-4.1472	3.2773	51	-7.8493	1.7451	206	-8.8393	2.2624	124	-14.1515	2.5817	144	-28.3068	8.6486	47	0.6952	0.1821	51	0.5048	0.0683	207	0.467	0.0745	124	0.6227	0.0795	144	1.2359	0.1359	47
112	-4.1472	3.2773	51	-7.7894	1.7641	204	-9.2257	2.2515	126	-13.2334	2.7555	144	-29.7697	8.7945	46	0.6952	0.1821	51	0.4916	0.0681	206	0.461	0.0734	126	0.6206	0.0789	144	1.2335	0.1354	46
113	-4.8235	3.2761	50	-7.4141	1.7427	204	-8.247	2.1461	127	-12.9428	2.7105	146	-30.2673	8.9777	45	0.6667	0.1822	50	0.4928	0.0687	204	0.4529	0.0729	127	0.6061	0.0743	146	1.2541	0.1368	45
114	-4.8235	3.2761	50	-7.2858	1.7394	203	-8.5504	1.9994	125	-12.6886	2.7274	144	-30.6139	9.1773	44	0.6667	0.1822	50	0.4866	0.0687	204	0.4282	0.0691	125	0.5926	0.0747	144	1.2619	0.1397	44
115	-4.9019	3.3427	49	-7.4948	1.7392	202	-8.1934	2.0231	126	-11.7355	2.686	146	-31.3782	9.3606	43	0.6802	0.1855	49	0.4903	0.069	203	0.4383	0.0714	126	0.5849	0.0738	146	1.2886	0.1404	43
116	-5.0039	3.4115	48	-7.2191	1.7285	201	-7.4149	2.0087	124	-11.4367	2.7621	143	-31.7246	9.5796	42	0.6944	0.1888	48	0.4872	0.0693	202	0.4384	0.0726	124	0.5977	0.0751	143	1.3048	0.1428	42
117	-4.9087	3.3425	49	-7.6762	1.5843	197	-7.6518	2.0365	122	-11.7281	2.7615	139	-33.6562	9.5717	42	0.6803	0.1855	49	0.4859	0.0697	201	0.4333	0.0731	122	0.5745	0.0708	139	1.3306	0.1426	42
118	-4.2736	3.3964	47	-7.2056	1.6322	195	-7.5874	2.0209	123	-11.107	2.7632	137	-32.8698	9.3795	43	0.6404	0.1863	47	0.486	0.0709	197	0.4298	0.0726	123	0.571	0.0717	137	1.3001	0.1425	43
119	-5.5154	3.2307	46	-7.8381	1.7215	198	-7.0608	2.0381	121	-11.295	2.8229	134	-32.8698	9.3795	43	0.5806	0.1803	46	0.4852	0.0715	195	0.3861	0.0689	121	0.5755	0.0729	134	1.3001	0.1425	43
120	-5.6538	3.3003	45	-8.0072	1.7434	195	-6.968	2.0415	121	-10.6135	2.8625	129	-32.8698	9.3795	43	0.5935	0.1838	45	0.4656	0.0699	198	0.3864	0.0689	121	0.5657	0.0738	129	1.3001	0.1425	43
121	-5.7462	3.4528	43	-7.6753	1.7459	192	-7.2925	2.0491	118	-11.6933	3.0262	129	-32.1228	9.1943	44	0.5633	0.1867	43	0.4654	0.0709	195	0.3882	0.0704	118	0.5792	0.0747	129	1.2753	0.1414	44
122	-5.8154	3.4494	43	-7.4895	1.7448	193	-6.854	2.1321	117	-10.7214	2.974	129	-32.7349	9.0084	45	0.5632	0.1867	43	0.4597	0.072	192	0.3882	0.0708	117	0.5446	0.073	129	1.2499	0.1405	45
123	-5.7654	3.3704	44	-7.7988	1.7588	194	-6.6032	2.1498	119	-10.9921	2.9791	127	-33.6063	8.8534	46	0.5503	0.1829	44	0.4629	0.0718	193	0.3874	0.0697	119	0.5243	0.0732	127	1.2965	0.1451	46
124	-5.5206	3.2268	46	-7.7277	1.7948	193	-6.4961	2.1154	121	-11.5161	3.0343	126	-32.0529	8.6632	46	0.5264	0.1756	46	0.4602	0.0707	194	0.3812	0.0686	121	0.5307	0.0735	126	1.2539	0.1433	46
125	-5.5206	3.2268	46	-7.4237	1.778	194	-6.5131	2.1148	121	-11.7714	3.0071	128	-30.4369	8.7024	45	0.5264	0.1756	46	0.4789	0.072	193	0.3614	0.0678	121	0.5286	0.0725	128	1.1853	0.1286	45
126	-5.2941	3.095	48	-7.0462	1.7716	194	-6.4859	2.0473	126	-11.4222	2.9207	132	-28.529	8.4449	47	0.5047	0.1689	48	0.4657	0.0712	194	0.3562	0.0654	126	0.5156	0.0706	132	1.1457	0.1262	47
127	-5.5692	3.2255	46	-6.8948	1.7783	193	-6.9162	2.1087	124	-11.4623	2.9897	128	-28.529	8.4449	47	0.5261	0.1757	46	0.4452	0.0685	194	0.3532	0.066	124	0.5068	0.0715	128	1.1457	0.1262	47
128	-6.1739	3.1547	49	-6.384	1.8343	191	-6.0555	2.0912	124	-10.9582	2.9551	128	-27.7409	8.5929	46	0.5273	0.1671	49	0.4274	0.067	193	0.3378	0.0654	124	0.5066	0.0715	128	1.1388	0.1288	46
129	-4.905	3.4706	48	-6.0328	1.8328	189	-5.7711	2.1281	121	-11.1378	2.9995	126	-28.563	9.1801	43	0.5247	0.1706	48	0.4275	0.0675	191	0.321	0.0648	121	0.5147	0.0724	126	1.1902	0.1339	43
130	-6.0571	3.6069	49	-5.7426	1.814	188	-5.8686	2.1434	120	-10.9248	3.1453	124	-28.4572	9.4007	42	0.5574	0.1708	49	0.4206	0.0669	189	0.3161	0.0653	120	0.5194	0.073	124	1.206	0.1361	42
131	-5.9418	3.5359	50	-5.634	1.7893	191	-5.4474	2.0855	121	-11.2806	3.1383	125	-28.4572	9.4007	42	0.5463	0.1677	50	0.4154	0.067	188	0.3008	0.0647	121	0.515	0.0726	125	1.206	0.1361	42
132	-5.717	3.4022	52	-5.207	1.7321	189	-5.5342	2.1378	118	-11.8	3.1676	123	-27.3721	9.5685	41	0.5262	0.1618	52	0.4083	0.0661	191	0.2985	0.0658	118	0.523	0.0735	123	1.1913	0.1387	41
133	-5.8154	3.4681	51	-5.2893	1.7593	186	-4.6011	2.292	119	-11.4259	3.1376	124	-28.0492	9.5425	41	0.5366	0.1647	51	0.4014	0.0652	189	0.3011	0.0653	119	0.5117	0.0731	124	1.1608	0.1414	41
134	-5.8154	3.4681	51	-5.2995	1.7959	182	-4.6196	2.2889	124	-11.4351	3.2132	121	-28.0492	9.5425	41	0.5366	0.1647	51	0.41	0.066	186	0.2921	0.0626	124	0.5079	0.0744	121	1.1608	0.1414	41
135	-6.2078	3.4618	52	-5.0235	1.7677	182	-4.5092	2.2366	127	-11.5399	3.2383	120	-29.1174	9.7261	40	0.5606	0.1634	52	0.4181	0.0673	182	0.2914	0.0612	127	0.5121	0.0749	120	1.1671	0.1456	40
136	-6.2078	3.4618	52	-5.0094	1.7762	181	-4.6074	2.2901	124	-10.9736	3.1481	122	-28.1803	9.8048	40	0.5606	0.1634	52	0.382	0.0639	182	0.2984	0.0625	124	0.5204	0.0748	122	1.1724	0.1462	40
137	-8.6513	4.1677	52	-4.9536	1.8144	175	-4.5725	2.272	125	-10.17	3.1486	122	-31.2602	9.5503	39	0.5875	0.1638	52	0.3848	0.0642	181	0.2961	0.0621	125	0.5289	0.0762	122	1.1608	0.1496	39
138	-8.5916	4.0888	53	-5.2872	1.8447	171	-4.8768	2.3433	123	-9.7525	3.1821	118	-29.5353	10.0315	37	0.6084	0.1621	53	0.3883	0.0661	175	0.2988	0.0631	123	0.5279	0.078	118	1.1289	0.1605	37
139	-8.4325	4.0155	54	-5.0568	1.8187	174	-3.9318	2.2715	122	-9.013	3.1344	119	-29.5353	10.0315	37	0.5991	0.1593	54	0.3967	0.0676	171	0.2686	0.06	122	0.5067	0.0776	119	1.1289	0.1605	37
140	-8.4325	4.0155	54	-4.571	1.8008	174	-4.9297	2.0898	124	-9.1118	3.107	120	-33.34	10.4791	38	0.5991	0.1593	54	0.3923	0.0665	174	0.2625	0.0589	124	0.51	0.0785	120	1.1854	0.1661	38
141	-8.2274	4.0866	53	-4.4726	1.8021	174	-4.9228	2.0899	124	-9.4909	3.1398	120	-33.7819	10.4311	38	0.4894	0.1177	53	0.3522	0.0626	174	0.2625	0.0589	124	0.5314	0.0834	120	1.1806	0.167	38
142	-8.1614	4.0885	53	-4.4453	1.8027	174	-4.6653	2.0652	126	-9.3348	3.1555	124	-30.9398	10.3115	37	0.4144	0.0971	53	0.3492	0.0627	174	0.2634	0.058	126	0.534	0.0823	124	1.1559	0.1697	37
143	-6.8953	3.9249	53	-4.3645	1.8114	176	-4.7411	2.0363	128	-8.2834	3.0962	128	-30.0964	10.5665	36	0.3652	0.0877	53	0.3555	0.0628	174	0.2594	0.0571	128	0.476	0.0745	128	1.1574	0.1745	36
144	-5.7704	3.8698	51	-4.2244	1.8167	175	-4.6906	2.0789	125	-7.435	3.1839	129	-31.153	10.7345	36	0.372	0.0909	51	0.3601	0.0621	176	0.2649	0.0584	125	0.4839	0.0744	129	1.1697	0.1778	36
145	-5.5399	3.7261	53	-4.1207	1.8242	174	-4.8059	2.1292	122	-6.4162	3.139	128	-32.2896	10.9836	35	0.3608	0.0878	53	0.3617	0.0624	175	0.2714	0.0597	122	0.4833	0.0749	128	1.1778	0.1828	35
146	-5.4427	3.6577	54	-3.2277	1.784	168	-4.6606	2.0797	125	-5.8627	3.0828	129	-33.2381	11.2693	34	0.359	0.0862	54	0.3614	0.0628	174	0.2647	0.0584	125	0.4687	0.0742	129	1.1522	0.1864	34
147	-5.6835	3.749	53	-2.6585	1.7047	166	-4.8412	2.1086	123	-5.9004	3.0821	129	-33.0145	11.2874	34	0.3423	0.0871	53	0.3465	0.0629	168	0.2677	0.0593	123	0.4693	0.0742	129	1.1166	0.1894	34
148	-7.8165	3.5758	49	-2.7319	1.7782	159	-4.5927	2.0704	123	-4.134	3.2133	130	-28.6053	12.1728	31	0.361	0.0934	49	0.3329	0.0629	166	0.2756	0.063	123	0.4724	0.0735	130	1.0122	0.1911	31
149	-6.8699	3.376	51	-2.5274	1.792	159	-4.3675	2.0845	122	-4.0958	3.1889	131	-26.7266	11.9351	32	0.3236	0.0904	51	0.3471	0.0654	159	0.2412	0.0579	122	0.4688	0.0731	131	1.0389	0.187	32
150	-6.8699	3.376	51	-2.5109	1.7808	160	-3.3587	1.9448	120	-4.0205	3.189	131	-25.9723	11.5923	33	0.3236	0.0904	51	0.3496	0.0656	159	0.2347	0.0583	120	0.4689	0.0731	131	1.0072	0.184	33
151	-6.4169	3.1977	54	-2.8296	1.8132	159	-4.0847	1.9954	124	-4.0514	3.2135	130	-25.9723	11.5923	33	0.3442	0.0877	54	0.3474	0.0653	160	0.2369	0.0571	124	0.4725	0.0735	130	1.0072	0.184	33
152	-6.4169	3.1977	54	-3.3458	1.8354	160	-4.6654	2.0906	127	-2.8558	3.0726	134	-26.3697	11.9534	32	0.3442	0.0877	54	0.338	0.0652	159	0.2317	0.0562	127	0.4578	0.0724	134	0.9958	0.1895	32
153	-5.6626	3.1666	53	-3.126	1.8614	160	-5.0561	2.1773	126	-2.4199	3.0945	132	-26.3697	11.9534	32	0.3187	0.0855	53	0.3244	0.0629	160	0.2319	0.0566	126	0.4624	0.0734	132	0.9958	0.1895	32
154	-5.3402	3.001	56	-2.5717	1.8547	160	-5.2712	2.1318	131	-2.4199	3.0945	132	-24.8338	12.6331	29	0.3019	0.0815	56	0.3319	0.0631	160	0.2264	0.0545	131	0.4624	0.0734	132	1.0048	0.2073	29
155	-4.9685	3.013	56	-2.2892	1.8938	155	-5.3061	2.1479	130	-2.5414	3.051	134	-23.8893	13.056	28	0.3204	0.0838	56	0.3203	0.0629	160	0.2279	0.0549	130	0.4558	0.0724	134	0.9816	0.2135	28
156	-4.9685	3.013	56	-1.5809	1.9216	148	-4.6778	2.1126	129	-2.5618	3.0739	133	-23.8893	13.056	28	0.3204	0.0838	56	0.2999	0.0597	155	0.1897	0.0444	129	0.4592	0.0729	133	0.9816	0.2135	28
157	-4.8739	2.9611	57	-1.5862	1.9215	148	-4.2825	2.0315	135	-2.5984	3.1209	131	-24.7721	13.5178	27	0.3148	0.0825	57	0.2671	0.0562	148	0.1925	0.0437	135	0.4665	0.0738	131	1.0127	0.2192	27
158	-4.8875	2.9607	57	-1.6033	1.9548	144	-4.2831	2.0315	135	-2.5984	3.1209	131	-31.6878	10.8681	27	0.3044	0.0824	57	0.2672	0.0562	148	0.1925	0.0437	135	0.4665	0.0738	131	0.9575	0.2215	27
159	-4.5889	3.0576	56	-1.5294	1.916	147	-3.9551	2.0243	137	-2.6503	3.1676	128	-31.6878	10.8681	27	0.2959	0.0804	56	0.2355	0.0482	144	0.1916	0.043	137	0.4612	0.0749	128	0.9575	0.2215	27
160	-4.158	3.0378	56	-1.5327	1.9425	145	-3.4917	2.0322	132	-2.0214	3.2212	129	-35.2034	11.1687	29	0.263	0.0755	56	0.2308	0.0473	147	0.1866	0.044	132	0.4792	0.0767	129	1.0135	0.2272	29
161	-3.0773	2.9525	60	-1.3255	1.9435	144	-2.937	2.0531	135	-1.5737	3.3182	124	-36.4306	10.8595	30	0.2544	0.071	60	0.2339	0.0479	145	0.1882	0.0432	135	0.4871	0.0794	124	1.0114	0.2195	30
162	-3.0709	2.8547	62	-1.5283	1.932	141	-2.8947	2.0233	137	-0.1546	3.3989	124	-34.0825	11.0401	28	0.2491	0.0688	62	0.2237	0.0479	144	0.1855	0.0427	137	0.494	0.08	124	0.9252	0.2252	28
163	-2.9532	2.8545	62	-0.7007	1.8321	140	-2.8889	2.0234	137	-0.7317	3.3495	124	-36.64	10.9553	29	0.2486	0.0688	62	0.2117	0.0472	141	0.1849	0.0427	137	0.4929	0.0801	124	0.9177	0.2174	29
164	-2.9532	2.8545	62	-0.7342	1.8197	141	-2.0575	2.0439	141	-0.5798	3.428	121	-36.64	10.9553	29	0.2486	0.0688	62	0.2066	0.0473	140	0.1917	0.0421	141	0.503	0.0818	121	0.9177	0.2174	29
165	-2.769	2.8527	62	-0.631	1.8596	138	-1.7762	1.9754	145	-0.8892	3.3886	123	-36.64	10.9553	29	0.2411	0.0688	62	0.2112	0.0472	141	0.1865	0.041	145	0.5043	0.0808	123	0.9177	0.2174	29
166	-2.769	2.8527	62	-0.6566	1.8459	139	-1.7863	1.9891	144	-0.528	3.3897	122	-37.9983	11.2662	28	0.2411	0.0688	62	0.2181	0.0482	138	0.1876	0.0413	144	0.4969	0.0812	122	0.9503	0.2228	28
167	-3.6385	2.9387	63	-0.8477	1.84	139	-1.6955	1.9497	147	1.1289	3.1783	122	-37.9983	11.2662	28	0.2447	0.0678	63	0.2168	0.0478	139	0.184	0.0405	147	0.4603	0.0734	122	0.9503	0.2228	28
168	-3.6971	2.9858	62	-1.0039	1.8695	139	-1.6859	1.9365	148	2.1011	3.3033	123	-37.9983	11.2662	28	0.2487	0.0688	62	0.2006	0.0456	139	0.1828	0.0402	148	0.4737	0.0741	123	0.9503	0.2228	28
169	-3.5856	2.9402	63	-0.5286	1.8833	134	-1.6654	1.9365	148	2.1492	3.3301	122	-34.409	11.0823	27	0.2499	0.0677	63	0.1797	0.0351	139	0.1865	0.0403	148	0.4754	0.0747	122	0.9299	0.2303	27
170	-3.4856	2.8499	65	-0.3986	1.9185	132	-1.2326	1.9467	148	2.1652	3.3026	123	-29.3921	11.7989	28	0.2423	0.0658	65	0.183	0.036	134	0.1864	0.0403	148	0.4715	0.0742	123	1.0287	0.2429	28
171	-3.3054	2.7253	68	0.1491	1.9178	130	-1.2676	1.9239	150	2.824	3.262	118	-28.3945	11.4284	29	0.2322	0.0631	68	0.2077	0.0419	132	0.1962	0.0413	150	0.463	0.076	118	0.9932	0.237	29
172	-3.2568	2.6859	69	-0.1605	1.9561	132	-0.6002	1.8977	150	1.8838	3.1285	116	-24.4748	11.0629	29	0.2288	0.0623	69	0.206	0.0425	130	0.2076	0.0429	150	0.4449	0.0755	116	0.894	0.2295	29
173	-3.2979	2.7254	68	0.0469	1.9585	133	-0.2451	1.9679	151	3.012	3.2781	114	-19.8291	11.6538	30	0.2282	0.0632	68	0.2234	0.0435	132	0.2205	0.0436	151	0.4237	0.0757	114	0.9435	0.2272	30
174	-3.2488	2.6861	69	-0.0879	1.9327	134	0.1543	1.9947	152	2.9788	3.2496	115	-17.184	11.5778	31	0.2249	0.0624	69	0.2217	0.0433	133	0.2237	0.0435	152	0.4201	0.0751	115	0.93	0.2201	31
175	-3.2061	2.6478	70	-0.0244	1.9052	136	-0.0945	2.0012	150	2.8396	3.3301	112	-17.184	11.5778	31	0.2217	0.0616	70	0.2194	0.043	134	0.2074	0.0402	150	0.4111	0.0765	112	0.93	0.2201	31
176	-3.2061	2.6478	70	-0.1405	1.884	138	0.2831	2.0232	151	3.5282	3.4398	112	-17.184	11.5778	31	0.2217	0.0616	70	0.2159	0.0424	136	0.208	0.0399	151	0.4199	0.0767	112	0.93	0.2201	31
177	-3.1164	2.5745	72	-0.2387	1.9038	137	0.324	2.0363	150	3.6991	3.4368	112	-15.7645	12.2319	29	0.2159	0.06	72	0.2142	0.0418	138	0.2085	0.0402	150	0.4347	0.0802	112	0.9221	0.2317	29
178	-3.0657	2.5395	73	-0.4815	1.8785	137	0.3245	2.05	149	3.7173	3.4366	112	-20.0061	12.7588	29	0.213	0.0593	73	0.2203	0.0424	137	0.2099	0.0404	149	0.4347	0.0802	112	0.953	0.2295	29
179	-3.0167	2.5054	74	-0.1439	1.6674	136	0.24	2.0631	148	3.6864	3.4062	113	-20.0061	12.7588	29	0.2101	0.0585	74	0.2353	0.0454	137	0.2083	0.0407	148	0.4308	0.0796	113	0.953	0.2295	29
180	-3.0167	2.5054	74	-0.423	3.084	217	0.188	2.0625	148	4.7947	3.3827	116	-20.0061	12.7588	29	0.2101	0.0585	74	0.2439	0.0462	136	0.2051	0.0407	148	0.4223	0.0776	116	0.953	0.2295	29
							-0.423	3.084	217	-0.423	3.084	217
