# Supplementary material for: Neural circuit mechanisms for transforming learned olfactory valences into wind-oriented movement
Source: eLife. 2023 Sep 18;12:e85756. doi: 10.7554/eLife.85756 (PMC10588983; doi:10.7554/eLife.85756)
Supplement: Figure 1—source data 8. [file elife-85756-fig1-data8.xlsx]

## Sheet: Sheet1
Trajectories	w;w,20xUAS-CsChrimson-mVenus; +/Empty-split-GA4	w;w,20xUAS-CsChrimson-mVenus; MB109B/MB315C	w;w,20xUAS-CsChrimson-mVenus; +/MB312C	w;w,20xUAS-CsChrimson-mVenus; +/MB213B	w;w,20xUAS-CsChrimson-mVenus; +/MB043C
#001	-0.2502	-3.5287	72.0727	0.2343	106.807
#002	-12.2359	-0.0952	0.7328	0.2021	160.768
#003	-0.126	0.9092	0	-33.7958	49.1039
#004	-60.6812	-1.1017	-2.1236	0.4032	-0.7548
#005	-0.4677	-2.6634	0.7713	1.8187	58.5587
#006	0.3195	-10.6741	0.0994	-114.667	3.66
#007	127.302	57.745	2.4361	12.4578	-3.8436
#008	-0.1275	26.8451	-0.4905	4.063	0.6838
#009	-16.6459	-0.0731	32.0748	0	37.074
#010	-19.4886	-0.6827	0	0.1527	113.87
#011	16.6769	-21.3253	8.0442	19.2367	31.2505
#012	-0.7836	-0.2113	0.5177	0.4685	69.7152
#013	-10.1813	40.1628	0.1472	-15.9247	-1.7958
#014	-0.3923	-0.5401	4.3268	-0.654	66.8225
#015	-0.2658	32.2631	-10.0906	-0.0608	-0.3201
#016	41.5509	19.5529	-0.0225	0.6854	71.5312
#017	-0.3609	3.6508	49.1205	-0.7561	27.4915
#018	-0.1013	-0.0241	0.4038	55.033	76.6547
#019	-31.0889	0.5215	67.4362	-23.6391	92.1412
#020	-0.6136	0.2651	-0.1365	-0.005	39.4723
#021	-0.2409	1.5184	-14.8266	3.3787	80.0357
#022	-69.8922	-0.1728	0.2829	-3.4418	41.6984
#023	-0.63	7.2149	-29.994	38.4413	48.7983
#024	-0.6251	15.7606	-0.265	-20.4088	59.6693
#025	-0.0026	4.5921	0.5676	1.0262	66.8406
#026	10.5544	-41.4175	0	-1.0785	65.081
#027	0	-32.0827	110.731	-0.1058	25.6494
#028	-0.4502	3.8193	0.4814	51.4065	17.6066
#029	-6.1501	-0.3639	39.3333	34.7702	-35.811
#030	-66.6199	-10.2123	-0.468	-0.2973	-0.0361
#031	0.5381	-0.3284	41.4496	0.005	42.4069
#032	9.1835	5.2403	0.3258	117.002	35.5098
#033	1.3707	1.2767	0.0754	18.5255	27.8849
#034	-22.1038	47.9064	17.3449	3.5484	63.3518
#035	-5.1011	-40.4283	0.7457	25.6402	-42.6533
#036	0.0204	-0.1531	-0.4082	35.9123	23.0716
#037	0.2841	0.0055	0.0519	-0.1058	47.7134
#038	0.3785	34.0504	-0.056	119.973	-18.2297
#039	-7.3254	0.2857	0.4403	-9.3859	27.3703
#040	0.5207	-0.0363	66.1293	2.855	43.2914
#041	0	28.8812	10.5325	23.2083	-220.084
#042	-0.0596	4.9481	-2.3148	0.6377	34.3618
#043	1.3939	-2.0702	-3.5045	-0.2142	-0.5325
#044	-18.3948	9.4144	-0.1108	-26.978	22.4078
#045	18.5395	21.1184	-0.0023	0	13.8669
#046	0.0874	-37.854	-0.0087	75.2668	116.818
#047	39.0239	-0.2359	59.4193	0.2503	104.773
#048	-0.128	-0.0012	-0.1158	56.5652	64.7796
#049	0.5974	-37.4096	-16.7235	-1.3042	27.3205
#050	-0.3258	24.3124	18.5298	-0.1127	8.5665
#051	4.3158	22.8583	-0.0015	0.9418	11.9854
#052	85.9379	1.56	0.1745	-5.2407	33.0056
#053	18.2835	-2.6617	0.4974	-4.3241	72.9471
#054	-1.7124	-1.196	-0.2555	71.7912	-0.8353
#055	32.3857	-0.7372	1.2964	6.454	-10.4867
#056	0.0636	-0.777	-0.0017	1.7971	-2.2228
#057	-0.1953	7.4891	2.9399	22.9465	15.415
#058	9.4878	34.7461	14.2941	37.2	-91.9341
#059	0.1914	2.3799	5.3873	50.0303	72.1788
#060	-0.5277	-0.7071	-1.5177	0.5042	37.8973
#061	-8.7152	-4.5708	69.2966	55.311	17.9002
#062	-41.1948	0.0176	48.4317	-3.7301	-16.847
#063	23.3044	72.0692	0.4431	24.3683	138.94
#064	44.6633	1.4868	-0.0124	-0.5154	61.3001
#065	7.3328	-0.3517	22.7191	50.9738	70.7479
#066	-0.0002	-0.0023	2.6948	84.5956	-1.28
#067	-2.9749	25.5806	-0.1948	38.8014	-8.6268
#068	1.1164	0.0381	-0.8045	-13.2397	0.0394
#069	0	2.4511	61.7247	0.7527	6.7859
#070	-0.274	37.492	0.0344	1.3905	-0.6625
#071	-0.095	-40.0973	50.428	-0.0223	58.6737
#072	10.8675	2.765	4.915	0.0065	87.118
#073	-0.1461	0.2148	2.7616	8.196	77.3262
#074	-1.5956	-5.4095	40.4619	-0.0189	13.2551
#075	0.6953	27.9551	12.14	26.9786	2.4326
#076	16.0099	20.7037	-14.999	-0.0881	-7.08
#077	0.1042	-1.1422	-0.2368	-41.1071	128.298
#078	19.3025	0.0283	0.0018	0	51.2784
#079	3.7898	0	29.3246	-0.0645	0.0548
#080	67.9988	-0.3053	34.7862	-1.2969	-186.595
#081	-0.4313	-4.3539	0.194	-1.7304	5.5137
#082	71.346	35.8207	-0.0005	59.1637	133.093
#083	-0.1867	18.1519	-5.6161	44.791	-1.39
#084	21.1788	-0.0365	0.0606	89.01	134.908
#085	-0.2061	14.6972	7.6229	-0.6302	112.636
#086	0.2548	0.2671	-0.2773	1.0836	4.109
#087	3.9669	10.8833	-3.7015	88.8644	71.4233
#088	-85.8197	45.5801	45.5535	-0.302	-0.1589
#089	-0.0014	0	-0.3678	32.7108	-0.0014
#090	0.0704	0.1329	7.7675	-50.5322	0.0704
#091	39.4203	-0.3138	-0.0024	-19.6238	39.4203
#092	-6.5672	0.5473	-1.5837	-0.0008	-6.5672
#093	46.39	13.5094	40.8498	-1.1069	46.39
#094	10.2557	-0.7639	0.1009	-0.1652	10.2557
#095	-0.1099	0.3053	-4.1088	72.2381	-0.1099
#096	1.0545	0.6697	-0.3818	68.5765	1.0545
#097	-0.8217	0.9434	32.6309	40.4272	-0.8217
#098	-0.5584	0.6998	-0.292	12.8647	-0.5584
#099	0.1154	-3.439	2.4514	97.0195	0.1154
#100	-4.1376	-1.7856	11.8901	47.3007	-4.1376
#101	-0.0243	35.2761	46.056	2.6568	-0.0243
#102	24.125	35.2463	0.0006	1.1284	24.125
#103	-4.8619	23.8901	4.9156	1.2189	-4.8619
#104	6.986	0	16.5834	32.4485	6.986
#105	10.2223	-37.7886	0.0757	-0.1361	10.2223
#106	0.0106	13.5142	76.7767	-0.2393	0.0106
#107	0.0428	13.2826	0.1068	0.8318	0.0428
#108	0.2367	48.5753	-7.0281	-17.4683	0.2367
#109	0.3394	-9.844	-0.4998	-25.0715	0.3394
#110		17.1431	31.2579	11.6483
#111		4.7256	-0.493	29.0393
#112		-0.0693	0.2327	23.4921
#113		0.3735	0.0087	-0.4662
#114		33.4567	-2.0504	0
#115		18.856	10.727	51.9975
#116		-2.5568	-0.2073	-0.481
#117		28.5676	-0.2936	74.321
#118		-0.5571	53.6307	2.5579
#119		-16.8621	0.2888	0.0035
#120		0	11.4404	30.3065
#121		27.0409	-0.1674	0.2333
#122		39.3439	37.0995	0.2736
#123		-23.7954	63.1636	-0.3198
#124		81.2379	0.7011	33.3801
#125		61.3234	0.0168	50.8741
#126		-1.7618	33.4598	61.6079
#127		42.3346	48.1207	49.7203
#128		2.3956	1.8703	0.1113
#129		8.5662	0.6194	72.5641
#130		-0.3022	-1.0537	-73.1583
#131		3.5861	-16.4211	-0.0315
#132		-2.1945	50.8898	-0.3951
#133		-0.298	-0.0035	1.6293
#134		25.3049	-0.2341	0.9414
#135		11.7051	-30.7218	-11.211
#136		-13.8313	-0.186	0.0727
#137		0.218	-0.3137	26.8087
#138		0.0068	14.1276	9.8636
#139		6.5897	0	70.5445
#140		-19.9682	0	1.5221
#141		10.0312	-0.004	-0.0011
#142		0.6906	-3.5777	-1.3598
#143		2.5396	0.0645	58.1731
#144		-1.4057	0.6742	67.8742
#145		55.4529	-0.1218	1.8011
#146		-0.5069	12.0569	5.7253
#147		0.5706	0	-49.4554
#148		-43.656	-1.5862	32.0597
#149		0.1568	41.2391	-1.2044
#150		1.1477	31.5741	6.0163
#151		0.771	18.5787	5.4662
#152		-58.7367	19.2835	-2.9927
#153		-32.0329	0.0649	0.5734
#154		-11.368	32.9516	0.1176
#155		44.4697	0.3298	51.9001
#156		-1.2762	-6.7664	0.3174
#157		0.0475	0.5662	69.3511
#158		-118.484	53.9299	-0.738
#159		-5.9921	-9.5467	0.0246
#160		0.0751	-0.1077	0.2215
#161		-20.0429	5.5932	0.3945
#162		-9.1857	0.3324	-0.2418
#163		7.3545	0.0059	0.1123
#164		7.2825	1.0066	-0.6277
#165		-23.9586	-6.2894	-17.3342
#166		0.5706	26.2555	-23.989
#167		-15.7718	-1.1701	36.7827
#168		5.7397	0.5405	-2.0413
#169		-28.5069	-0.2882	-0.0409
#170		0	2.4976	21.593
#171		33.8243	-0.8618	11.608
#172		15.9354	1.497	0.0018
#173		31.1416	-0.6925	-2.1404
#174		34.8301	31.951	0.167
#175		0	57.9733	74.7326
#176		5.6606	62.5176	-0.0746
#177		-2.1904	-95.5658	59.4854
#178		-29.6316	-4.6367	66.3243
#179		3.6953	0.7182	51.6228
#180		0	-0.1164	0.0243
#181		-6.4074	-0.9103	-29.58
#182		16.946	-0.2215	0.8336
#183		-4.8812	-2.2731	15.9599
#184		28.6999	0	8.6735
#185		43.5113	23.2104	38.194
#186		2.0356	0.1282	52.4569
#187		23.0439	0	-13.7086
#188		38.0944	0	27.263
#189		25.3388	0	0.0245
#190		12.1591	-12.4391	11.9276
#191		0.581	-0.0544	-11.3859
#192		-0.9181	0.0046	9.8477
#193		40.0528	9.5805	-0.1572
#194		21.2181	59.0349	9.87
#195		-1.173	-7.4081	0.0973
#196		56.625	19.3406	21.0631
#197		-3.4548	8.3011	-0.2643
#198		65.8458	2.9679	73.154
#199		-0.352	64.5762	0.18
#200		0.7687	0.6812	0.9106
#201		118.316	85.9838	61.0219
#202		0.3663	-16.9684	63.8461
#203		-1.0711	31.8487	3.4387
#204		11.2135	-15.0348	-3.1131
#205		-0.0562	37.0116	-1.8785
#206		3.8629	-0.6285	36.375
#207		0.2398	0.3747	-0.0072
#208		-2.7261	0.7359	7.3002
#209		0.1232	0	2.955
#210		18.406	63.1015	0
#211		0.8292	23.0834	79.1422
#212		0.4024	1.8531	29.6257
#213		0	-1.8209	1.476
#214		6.5172	0.1468	0
#215		-23.8157	-0.6296	54.923
#216		55.2551	0.1018	-0.3084
#217		13.2695	1.5474	-0.1701
#218		1.5459	-0.0021	-1.8333
#219		19.27	5.3516	2.1627
#220		0.1748	0.2765	0.0029
#221		0.2356	73.7749	-0.4637
#222		0.1465	-0.6495	-36.4189
#223		50.93	-0.0158	37.6515
#224		0.4407	-0.003	-2.3397
#225		-2.7463	33.5261	-0.3384
#226		2.7818	0.0973	-12.7527
#227		-15.2201	0.1969	-0.4778
#228		2.0916	-0.0198	27.9239
#229		-1.5435	2.1852	51.733
#230		0.9116	0.2614	-0.8099
#231		-22.8678	0.1104	68.1095
#232		-0.7447	25.671	-3.4864
#233		-18.3768	16.646	-70.8465
#234		1.7494	0.6168	22.7445
#235		0.5977	0.3748	-1.1348
#236		-23.9513	38.7826	-1.0428
#237		25.6894	37.7795	1.2916
#238		54.1711	0.3144	2.3331
#239		8.8433	-22.0666	53.5064
#240		0.1315	0.5682	101.674
#241		-2.4215	1.617	100.168
#242		-0.0007	4.211	0.4366
#243		28.1636	-42.5234	4.2364
#244		0.3868	1.2394	-0.1137
#245		22.1461	0.2214	3.9613
#246		0.1143	-0.1167	100.716
#247		24.6326	5.8621	-70.5736
#248		0.0066	-0.2634	1.0014
#249		0.7721	-5.9757	-0.1037
#250		87.4648	-6.8551	35.8769
#251		0.0057	-7.4259	14.6509
#252		61.8578	-0.2939	-129.024
#253		-0.3312	-0.0022	-0.0022
#254		67.6612	-3.2227	-3.2227
#255		-31.6974	11.0962	11.0962
#256		68.5452	20.6026	20.6026
#257		-0.074	-0.669	-0.669
#258		-4.6217	1.4229	1.4229
#259		0	-26.2207	-26.2207
#260		11.3254	-0.8376	-0.8376
#261		-0.0107	2.6281	2.6281
#262		0.3306	0.4921	0.4921
#263		-0.0013	-0.1128	-0.1128
#264		-0.1725	7.9267	7.9267
#265		0.494	-62.2858	-62.2858
#266		0	0	0
#267		-7.9348	15.8301	15.8301
#268		5.1093	-0.4169	-0.4169
#269		10.7256	34.2711	34.2711
#270		11.7609		11.7609
#271		0.5665		0.5665
#272		-23.5172		-23.5172
#273		0.2157		0.2157
#274		-2.1629		-2.1629
#275		0.3119		0.3119
#276		0.0915		0.0915
#277		28.3392		28.3392
#278		0.1719		0.1719
#279		28.9137		28.9137
#280		0.1398		0.1398
#281		0.1405		0.1405
#282		44.7079		44.7079
#283		12.1326		12.1326
#284		-0.472		-0.472
#285		-9.5068		-9.5068
#286		58.4814		58.4814
#287		2.9399		2.9399
#288		-0.8676		-0.8676
#289		-0.4547		-0.4547
#290		35.0909		35.0909
#291		2.5543		2.5543
#292		31.027		31.027
#293		0.0008		0.0008
#294		-3.4742		-3.4742
#295		-7.335		-7.335
#296		-0.0039		-0.0039
#297		33.2949		33.2949
#298		-0.6372		-0.6372
#299		-21.8463		-21.8463
#300		0.3388		0.3388
#301		0.151		0.151
#302		-0.0802		-0.0802
#303		2.089		2.089
#304		-5.1149		-5.1149
#305		12.1233		12.1233
#306		29.404		29.404
#307		-8.4446		-8.4446
#308		0.083		0.083
#309		41.9434		41.9434
#310		-40.5865		-40.5865
#311		-0.2619		-0.2619
#312		-24.7778		-24.7778
#313		-9.623		-9.623
#314		79.8928		79.8928
#315		46.417		46.417
#316		0.0035		0.0035
#317		7.0598		7.0598
#318		-0.0117		-0.0117
#319		-1.3506		-1.3506
#320		3.0744		3.0744
#321		-4.2085		-4.2085
#322		-15.296		-15.296
#323		-11.9909		-11.9909
#324		33.4426		33.4426
#325		0.2789		0.2789
#326		-1.2136		-1.2136
#327		6.0064		6.0064
#328		2.9913		2.9913
#329		-1.0155		-1.0155
#330		0.8054		0.8054
#331		0.1252		0.1252
#332		62.3028		62.3028
#333		0.0493		0.0493
#334		-1.4203		-1.4203
#335		-0.828		-0.828
#336		12.5992		12.5992
#337		38.6488		38.6488
#338		-0.3255		-0.3255
#339		11.4885		11.4885
#340		15.0655		15.0655
#341		0.714		0.714
#342		-13.6709		-13.6709
#343		3.1197		3.1197
#344		-0.0222		-0.0222
#345		-8.1799		-8.1799
#346		-0.2556		-0.2556
#347		-29.2394		-29.2394
#348		-0.691		-0.691
#349		0.0048		0.0048
#350		-0.3328		-0.3328
#351		-0.6127		-0.6127
#352		0.2717		0.2717
#353		1.6709		1.6709
#354		0.794		0.794
#355		17.7046		17.7046
#356		0.4103		0.4103
#357		-58.0697		-58.0697
#358		-20.3455		-20.3455
#359		0		0
#360		0.1543		0.1543
#361		-15.0189		-15.0189
#362		0.1136		0.1136
#363		132.083		132.083
