# Supplementary material for: Neural circuit mechanisms for transforming learned olfactory valences into wind-oriented movement
Source: eLife. 2023 Sep 18;12:e85756. doi: 10.7554/eLife.85756 (PMC10588983; doi:10.7554/eLife.85756)
Supplement: Figure 2—figure supplement 1—source data 1. [file elife-85756-fig2-figsupp1-data1.xlsx]

## Sheet: Sheet1
Data_Type	female	male	protocol	Movie	Arena	Camera	Time	N (trials)	0.333333	0.666667	1	1.33333	1.66667	2	2.33333	2.66667	3	3.33333	3.66667	4	4.33333	4.66667	5	5.33333	5.66667	6	6.33333	6.66667	7	7.33333	7.66667	8	8.33333	8.66667	9	9.33333	9.66667	10	10.3333	10.6667	11	11.3333	11.6667	12	12.3333	12.6667	13	13.3333	13.6667
DeltaDistanceFromCenter	MB083C	20xUAS-CsChrimson-mVenus-attP18	10sLED	AirLED	Arena2	Cam0	20190707T223606	6	0.0276808	0.0248834	0.0169799	0.0179367	0.0211941	0.016779	0.014703	0.0191398	0.0173954	0.0136412	0.0145031	0.017091	0.0211633	0.025217	0.0270312	0.0181196	0.0197733	0.0249205	0.0277591	0.0243643	0.0173393	0.0131332	0.0152757	0.0155463	0.0145525	0.0144581	0.0128033	0.00941606	0.0024352	0	-0.00381692	-4.0601e-05	0.0211891	0.0457427	0.0697027	0.0884595	0.101928	0.115056	0.127772	0.132863	0.129855
DeltaDistanceFromCenter	MB083C	20xUAS-CsChrimson-mVenus-attP18	10sLED	AirLED	olfactoryArena1	Cam1	20190707T222658	6	-0.0128843	-0.0131686	-0.0165363	-0.0160274	-0.0167725	-0.0183514	-0.0158735	-0.0187572	-0.01564	-0.0131485	-0.0158389	-0.0174103	-0.0171817	-0.0154225	-0.0144896	-0.0137368	-0.0137393	-0.0165254	-0.0129868	-0.010686	-0.00760526	-0.00298508	2.0574e-05	-0.00211237	-0.00150677	0.00396806	0.00695061	0.00536917	0.00128056	0	0.00430748	0.0201874	0.0335784	0.0458889	0.0536056	0.0653968	0.0765749	0.0723687	0.0790942	0.0877056	0.0833618
DeltaDistanceFromCenter	MB083C	20xUAS-CsChrimson-mVenus-attP18	10sLED	AirLED	olfactoryArena1	Cam1	20190803T101629	6	0.0205407	0.0233059	0.0246219	0.019143	0.0174391	0.0172389	0.0159762	0.0149479	0.0135431	0.0112702	0.0133404	0.0114221	0.0125476	0.0104526	0.0116216	0.0072029	0.00395658	-0.00154228	-0.00493447	-0.0091691	-0.010172	-0.0122796	-0.0101506	-0.00659455	-0.00522023	0.000185208	0.00218895	0.00194693	5.6483e-05	0	0.00371779	0.0223457	0.0407031	0.0543891	0.0701758	0.0847175	0.0953653	0.100396	0.10687	0.105613	0.103928
DeltaDistanceFromCenter	MB083C	20xUAS-CsChrimson-mVenus-attP18	10sLED	AirLED	olfactoryArena1	Cam0	20190707T222658	5	0.00487361	0.00640904	0.00448908	0.000949821	-0.00183152	-0.00167453	-0.000414974	0.00860443	0.0108795	0.0125228	0.0135952	0.00924458	0.00766162	0.00784124	0.00989699	0.00831288	0.0090665	0.00413031	-0.00193133	-0.00564575	-0.00205154	-0.00572773	-0.00954434	-0.00902421	-0.00934763	-0.00958293	-0.0111157	-0.00949508	-0.00313644	0	0.00209245	0.00473038	0.0211379	0.0358115	0.0450644	0.0536646	0.0667694	0.0749271	0.0846349	0.089134	0.087111
DeltaDistanceFromCenter	MB083C	20xUAS-CsChrimson-mVenus-attP18	10sLED	AirLED	olfactoryArena1	Cam0	20190803T101629	5	0.00477126	-0.0124109	-0.0176366	-0.0198527	-0.0187244	-0.0185225	-0.00258825	-0.00292023	-0.000760512	-0.0085316	-0.0167973	-0.0123298	-0.00679315	-0.00794487	-0.00791543	-0.00460921	-0.000281508	0.00150993	-0.00758352	-0.011665	-0.00163122	-0.00192687	-0.00223957	-0.00163514	0.00393676	0.00653823	-0.00220505	0.000825666	0.00487789	0	-0.0322243	-0.00423611	0.0107328	0.00857947	0.0307418	0.0547205	0.0682869	0.0766075	0.0849418	0.0864215	0.0937752
DeltaDistanceFromCenter	MB083C	20xUAS-CsChrimson-mVenus-attP18	10sLED	AirLED	Arena2	Cam1	20190707T223606	4	-0.00148059	0.003944	0.0113082	0.0183636	0.0210913	0.0276057	0.0384313	0.0332726	0.0283851	0.0226605	0.00845442	0.0360316	0.0415354	0.0384226	0.0384866	0.0406513	0.0392388	0.0321856	0.0251428	0.0234863	0.00782364	0.0194989	0.0241031	0.0203429	0.0133304	0.00437686	0.0125885	0.00861258	0.00619427	0	-0.0601281	-0.00608047	0.0269962	0.0568871	0.0797369	0.104874	0.13165	0.132823	0.140327	0.134325	0.0901124
Cos(Upwind)	MB083C	20xUAS-CsChrimson-mVenus-attP18	10sLED	AirLED	Arena2	Cam0	20190707T223606	6	-0.0783791	0.0354795	0.00019158	0.00973259	-0.0506845	-0.061491	-0.0109904	0.0163871	-0.0383027	-0.027098	-0.0245964	-0.00212465	-0.0726269	-0.0414112	-0.0361996	-0.0164879	0.00419083	0.0235029	-0.0334931	-0.0670961	-0.0549195	-0.0288478	-0.00766879	-0.0194403	-0.0208791	0.0238947	0.0207527	-0.0199028	-0.0628326	-0.0670307	-0.0671206	0.0753424	0.275215	0.347891	0.313996	0.296046	0.15644	0.164858	0.221376	0.170987	0.0691029
Cos(Upwind)	MB083C	20xUAS-CsChrimson-mVenus-attP18	10sLED	AirLED	olfactoryArena1	Cam1	20190707T222658	6	-0.0724107	-0.0502925	-0.0935693	-0.118213	-0.132821	-0.106077	-0.0906963	-0.126942	-0.0519655	-0.0474837	-0.0793899	-0.0824292	-0.117622	-0.122218	-0.111702	-0.121332	-0.13877	-0.127469	-0.0263706	-0.068525	-0.0854018	-0.0696911	-0.0956283	-0.104265	-0.0743599	-0.0196387	-0.039839	-0.0975083	-0.106811	-0.0992977	-0.0057188	0.192614	0.20774	0.172159	0.168642	0.210567	0.172051	0.185996	0.193077	0.111969	0.0782641
Cos(Upwind)	MB083C	20xUAS-CsChrimson-mVenus-attP18	10sLED	AirLED	olfactoryArena1	Cam1	20190803T101629	6	-0.0822137	-0.117942	-0.136789	-0.154595	-0.124358	-0.121498	-0.106734	-0.105032	-0.0563784	-0.0693122	-0.0886273	-0.0938547	-0.114067	-0.158552	-0.146917	-0.170987	-0.150518	-0.162047	-0.121224	-0.141635	-0.110189	-0.106972	-0.125483	-0.106007	-0.066012	-0.0124516	-0.044538	-0.0700349	-0.109516	-0.117751	0.00159959	0.150307	0.179153	0.165645	0.176389	0.188165	0.172791	0.159009	0.14036	0.0793512	0.0582367
Cos(Upwind)	MB083C	20xUAS-CsChrimson-mVenus-attP18	10sLED	AirLED	olfactoryArena1	Cam0	20190707T222658	5	-0.0782119	-0.10367	-0.126605	-0.177611	-0.160855	-0.116171	-0.0830793	-0.104639	-0.0947234	-0.0737036	-0.109989	-0.127248	-0.123579	-0.142763	-0.127747	-0.11428	-0.143171	-0.136921	-0.1502	-0.107961	-0.0861517	-0.0661962	-0.0809562	-0.0768539	-0.0186636	-0.0317087	-0.0543665	-0.0323277	-0.0228159	-0.000113518	-0.0660281	-0.00415203	0.143277	0.169829	0.184034	0.200579	0.195939	0.229952	0.259571	0.142288	0.144245
Cos(Upwind)	MB083C	20xUAS-CsChrimson-mVenus-attP18	10sLED	AirLED	olfactoryArena1	Cam0	20190803T101629	5	0.0332334	-0.115924	-0.126517	-0.134147	-0.159875	-0.172114	-0.162406	-0.131646	-0.116884	-0.131093	-0.121604	-0.0983101	-0.0692555	-0.0865753	-0.121723	-0.118602	-0.0896149	-0.106527	-0.0741442	-0.0784013	-0.098247	-0.11809	-0.098689	-0.0850528	-0.0966374	-0.113652	-0.150524	-0.138976	-0.151411	-0.16836	-0.145907	-0.131254	0.0293757	0.217504	0.253356	0.261482	0.292235	0.277326	0.278986	0.226535	0.216122
Cos(Upwind)	MB083C	20xUAS-CsChrimson-mVenus-attP18	10sLED	AirLED	Arena2	Cam1	20190707T223606	4	-0.0190812	-0.0692238	-0.0550686	-0.0584482	-0.0586694	0.00208952	0.0128147	-0.0308653	-0.00998634	-0.0494727	-0.0767906	-0.0264459	-0.0609794	-0.117832	-0.104334	-0.110461	-0.0662874	-0.081258	-0.0765757	-0.1041	-0.0642986	-0.128241	-0.156254	-0.149797	-0.163536	-0.147441	-0.0936277	-0.114336	-0.141775	-0.145103	-0.047874	0.147631	0.196176	0.215954	0.214951	0.223142	0.203022	0.197411	0.101155	0.0821724	0.0916755
DeltaAnglefroPreviousFrame	MB083C	20xUAS-CsChrimson-mVenus-attP18	10sLED	AirLED	Arena2	Cam0	20190707T223606	6	140.387	167.058	165.232	173.102	163.07	169.896	160.494	161.429	155.702	170.943	169.431	165.477	188.67	183.853	176.467	176.52	174.906	172.596	175.897	166.87	166.335	163.688	157.078	148.547	163.358	147.619	165.179	148.721	157.994	158.732	164.985	218.139	186.355	205.179	190.907	190.503	169.722	168.702	163.971	176.235	166.65
DeltaAnglefroPreviousFrame	MB083C	20xUAS-CsChrimson-mVenus-attP18	10sLED	AirLED	olfactoryArena1	Cam1	20190707T222658	6	123.17	134.093	135.202	137.581	139.514	150.603	136.236	130.155	133.507	128.267	133.883	135.472	123.785	134.45	127.232	120.037	132.427	134.493	136.628	127.744	150.124	139.424	143.283	150.533	132.05	139.47	132.711	123.725	112.86	130.761	199.638	160.296	150.89	163.093	157.43	140.458	138.193	154.183	140.055	132.585	130.92
DeltaAnglefroPreviousFrame	MB083C	20xUAS-CsChrimson-mVenus-attP18	10sLED	AirLED	olfactoryArena1	Cam1	20190803T101629	6	105.228	107.914	111.034	108.58	102.848	113.749	101.942	108.841	109.678	89.5965	101.231	108.365	108.878	123.554	105.472	91.4341	112.68	107.301	100.949	108.482	109.428	103.879	90.3554	104.902	98.6901	103.43	103.084	100.168	98.2696	100.358	162.937	174.117	142.688	163.053	128.363	112.642	124.113	127.988	131.666	129.135	124.322
DeltaAnglefroPreviousFrame	MB083C	20xUAS-CsChrimson-mVenus-attP18	10sLED	AirLED	olfactoryArena1	Cam0	20190707T222658	5	152.596	140.796	154.627	176.905	165.181	157.749	149.121	166.077	167.5	168.371	157.33	181.715	173.704	173.977	150.409	159.679	161.35	191.969	165.955	175.854	174.319	165.779	166.638	166.325	171.204	165.623	170.912	164.317	167.45	176.214	164.769	238.549	198.582	202.95	182.869	199.973	193.097	189.801	190.297	189.643	189.881
DeltaAnglefroPreviousFrame	MB083C	20xUAS-CsChrimson-mVenus-attP18	10sLED	AirLED	olfactoryArena1	Cam0	20190803T101629	5	97.852	91.796	105.975	116.588	94.238	95.6603	100.195	100.616	104.906	97.7505	95.6978	96.6948	99.4098	101.664	100.963	93.8187	102.206	94.8651	98.6181	107.013	100.555	109.943	115.917	113.832	121.858	103.602	94.8749	97.6317	101.012	99.1391	90.6222	175.603	179.683	164.422	144.793	164.996	147.354	133.529	128.727	141.831	140.897
DeltaAnglefroPreviousFrame	MB083C	20xUAS-CsChrimson-mVenus-attP18	10sLED	AirLED	Arena2	Cam1	20190707T223606	4	100.847	108.077	96.0371	114.708	117.691	102.037	110.254	121.554	109.514	112.356	113.885	128.425	119.99	114.834	123.975	121.738	124.777	104.238	106.194	112.825	106.526	103.482	110.623	112.089	112.263	100.217	90.1209	99.3667	98.3283	123.741	187.194	170.619	148.094	153.2	149.41	120.423	133.026	126.089	142.536	135.757	133.349
WalkingDistanceFromPreviousFrame	MB083C	20xUAS-CsChrimson-mVenus-attP18	10sLED	AirLED	Arena2	Cam0	20190707T223606	6	2.38244	2.45845	2.46366	2.66652	2.44627	2.45684	2.6626	2.4998	2.51711	2.44565	2.44331	2.38953	2.51873	2.59106	2.7664	2.75908	2.65277	2.67783	2.69286	2.35121	2.45205	2.38562	2.57408	2.45692	2.47644	2.38783	2.4996	2.3658	2.35313	2.20133	2.41147	2.61248	2.35976	2.41947	2.51142	2.38275	2.28471	2.3244	1.95349	1.87901	1.88783
WalkingDistanceFromPreviousFrame	MB083C	20xUAS-CsChrimson-mVenus-attP18	10sLED	AirLED	olfactoryArena1	Cam1	20190707T222658	6	1.30521	1.67474	1.62941	1.55347	1.71575	1.75296	1.80829	1.67012	1.62744	1.67077	1.74601	1.73331	1.69766	1.68054	1.60816	1.61927	1.70289	1.81921	1.72351	1.84719	1.80078	1.74615	1.93791	1.83827	1.54881	1.66982	1.6392	1.63165	1.53709	1.62394	2.04541	2.06383	1.93546	1.90236	1.89065	1.93922	1.77204	1.80295	1.74146	1.77539	1.88462
WalkingDistanceFromPreviousFrame	MB083C	20xUAS-CsChrimson-mVenus-attP18	10sLED	AirLED	olfactoryArena1	Cam1	20190803T101629	6	1.12113	1.34748	1.5218	1.37424	1.2634	1.48688	1.34334	1.31981	1.38195	1.27059	1.33072	1.2327	1.27202	1.33653	1.31837	1.22866	1.31818	1.49711	1.31995	1.34958	1.4768	1.30402	1.23352	1.35465	1.36284	1.33542	1.33883	1.3393	1.28526	1.28062	1.63421	1.77181	1.66177	1.59466	1.45696	1.48904	1.48532	1.42491	1.31612	1.35385	1.25425
WalkingDistanceFromPreviousFrame	MB083C	20xUAS-CsChrimson-mVenus-attP18	10sLED	AirLED	olfactoryArena1	Cam0	20190707T222658	5	1.85606	1.83015	1.81482	1.95433	2.12521	1.93156	1.7151	1.97872	2.22909	2.02763	1.83131	2.13061	1.91979	2.06306	1.95809	1.91667	2.03143	2.03163	2.10401	2.05042	1.98269	2.12493	1.95162	1.96973	1.96735	2.05599	2.07364	1.88674	1.86463	2.07558	1.91039	2.22588	2.05421	1.94823	2.14055	2.08194	2.11438	1.77418	1.64533	1.98518	1.94128
WalkingDistanceFromPreviousFrame	MB083C	20xUAS-CsChrimson-mVenus-attP18	10sLED	AirLED	olfactoryArena1	Cam0	20190803T101629	5	1.15264	1.28188	1.42171	1.44425	1.51447	1.37378	1.30171	1.43797	1.48156	1.35369	1.34526	1.33395	1.32675	1.3988	1.3899	1.34633	1.20017	1.32438	1.29297	1.3516	1.31631	1.17338	1.34532	1.56677	1.4978	1.483	1.50792	1.52598	1.37212	1.23635	1.30222	1.69566	1.69972	1.7721	1.80652	1.80901	1.8	1.53499	1.70768	1.69573	1.55809
WalkingDistanceFromPreviousFrame	MB083C	20xUAS-CsChrimson-mVenus-attP18	10sLED	AirLED	Arena2	Cam1	20190707T223606	4	1.46814	1.56682	1.50425	1.59997	1.64312	1.52919	1.68514	1.76343	1.47299	1.55651	1.45046	1.54173	1.45731	1.32605	1.31969	1.2721	1.3439	1.29095	1.3334	1.27335	1.40711	1.29017	1.31407	1.44352	1.56322	1.24755	1.28586	1.36835	1.39566	1.51185	1.86845	2.23688	2.36157	2.52436	2.08015	1.84016	1.85434	1.66982	2.26822	1.91011	2.19748
revisit-10mmOut3mmIn-15s	MB083C	20xUAS-CsChrimson-mVenus-attP18	10sLED	AirLED	Arena2	Cam0	20190707T223606	6	0.19885	0.191922	0.195	0.2	0.185	0.197682	0.201667	0.17	0.175	0.193333	0.193484	0.207105	0.198026	0.227361	0.243333	0.256193	0.274397	0.282542	0.248827	0.235	0.238591	0.256754	0.292452	0.271542	0.236633	0.245147	0.247052	0.241111	0.221136	0.221205	0.209775	0.184909	0.178448	0.189445	0.211093	0.232846	0.264604	0.26691	0.260934	0.258156	0.259286
revisit-10mmOut3mmIn-15s	MB083C	20xUAS-CsChrimson-mVenus-attP18	10sLED	AirLED	olfactoryArena1	Cam1	20190707T222658	6	0.171376	0.169624	0.172619	0.183931	0.19044	0.187618	0.177201	0.181746	0.176804	0.159222	0.167136	0.149567	0.141667	0.141811	0.143326	0.163023	0.161632	0.164543	0.142532	0.128932	0.152033	0.151804	0.160281	0.141776	0.15949	0.133874	0.126227	0.134885	0.126082	0.14301	0.132566	0.140157	0.149407	0.153712	0.153987	0.189764	0.200371	0.211065	0.215557	0.220571	0.185766
revisit-10mmOut3mmIn-15s	MB083C	20xUAS-CsChrimson-mVenus-attP18	10sLED	AirLED	olfactoryArena1	Cam1	20190803T101629	6	0.0896297	0.08577	0.0820032	0.0793014	0.0867045	0.086802	0.0776402	0.0889376	0.0868481	0.101947	0.0763814	0.0867871	0.0852166	0.112478	0.127339	0.132087	0.133048	0.139666	0.128119	0.13215	0.138642	0.109975	0.10249	0.10766	0.123449	0.105831	0.115692	0.109848	0.0839209	0.0752035	0.0884257	0.0961895	0.103281	0.111014	0.131577	0.110624	0.123782	0.148051	0.158549	0.164315	0.174581
revisit-10mmOut3mmIn-15s	MB083C	20xUAS-CsChrimson-mVenus-attP18	10sLED	AirLED	olfactoryArena1	Cam0	20190707T222658	5	0.193488	0.219705	0.201724	0.196878	0.207537	0.22022	0.231705	0.198698	0.200893	0.189981	0.187853	0.170814	0.166587	0.154573	0.156135	0.157002	0.177427	0.174892	0.154875	0.139286	0.154077	0.181925	0.20087	0.165951	0.156725	0.144358	0.158893	0.133875	0.131968	0.12491	0.137808	0.155275	0.18462	0.195293	0.180648	0.183605	0.1673	0.191682	0.195969	0.207902	0.202664
revisit-10mmOut3mmIn-15s	MB083C	20xUAS-CsChrimson-mVenus-attP18	10sLED	AirLED	olfactoryArena1	Cam0	20190803T101629	5	0.162218	0.157444	0.127542	0.116622	0.122329	0.125445	0.146533	0.160134	0.15692	0.160031	0.130054	0.12878	0.142392	0.146627	0.152499	0.157495	0.19751	0.208741	0.207466	0.20901	0.209521	0.216128	0.217642	0.2044	0.22527	0.248297	0.248938	0.254987	0.249071	0.261402	0.237761	0.213709	0.222838	0.253953	0.251036	0.247779	0.246872	0.279288	0.295376	0.301335	0.295125
revisit-10mmOut3mmIn-15s	MB083C	20xUAS-CsChrimson-mVenus-attP18	10sLED	AirLED	Arena2	Cam1	20190707T223606	4	0.268354	0.263928	0.238568	0.247451	0.271247	0.281454	0.317314	0.351213	0.3519	0.369715	0.33913	0.359903	0.333763	0.344443	0.392619	0.425068	0.420459	0.403363	0.370976	0.324454	0.340344	0.354801	0.317981	0.347303	0.335953	0.33582	0.349808	0.322188	0.347749	0.305047	0.236241	0.26147	0.319074	0.385603	0.414626	0.420824	0.459569	0.429695	0.429653	0.379312	0.364309
DeltaDistanceFromCenter	MB390B	20xUAS-CsChrimson-mVenus-attP18	10sLED	AirLED	Arena2	Cam0	20191210T131700	6	0.011881	0.0268935	0.0290978	0.0326543	0.0336053	0.0332131	0.0390066	0.0324105	0.0360515	0.0476759	0.0510888	0.0561308	0.0623664	0.0685802	0.0727806	0.0646964	0.0611436	0.0564004	0.0600653	0.0624081	0.0608093	0.0527678	0.0389924	0.0260956	0.0138455	0.00460364	-0.00247467	-0.0062511	-0.00647622	0	0.00412977	-0.00172191	-0.000543793	0.0129779	0.0318289	0.0595676	0.0891034	0.116632	0.131159	0.138152	0.143017
DeltaDistanceFromCenter	MB390B	20xUAS-CsChrimson-mVenus-attP18	10sLED	AirLED	Arena2	Cam0	20191217T135618	6	-0.0130468	-0.0225137	-0.037058	-0.0531808	-0.0613667	-0.0674758	-0.065485	-0.0602326	-0.0521535	-0.0356823	-0.0121457	0.00285793	0.0131152	0.0246275	0.0313719	0.0390252	0.0377094	0.035378	0.0352908	0.0340991	0.0314907	0.0258842	0.017008	0.00364643	-0.00600932	-0.00773794	-0.00157833	-0.000823397	0.00303531	0	0.00217467	0.00774546	0.0208079	0.0428928	0.0636894	0.0788258	0.0890231	0.0956666	0.102003	0.107563	0.115077
DeltaDistanceFromCenter	MB390B	20xUAS-CsChrimson-mVenus-attP18	10sLED	AirLED	Arena2	Cam0	20191217T140750	6	0.00606996	0.010517	0.0126582	0.0146465	0.0144313	0.0138282	0.0113165	0.01468	0.0135548	0.00882244	0.00791337	0.00766631	0.00360108	0.000410066	-0.0027501	-0.00595812	-0.0102604	-0.0129267	-0.0156431	-0.0150068	-0.0114856	-0.00699232	0.000544626	0.00276294	0.00430043	0.00359186	0.00135772	-0.00246182	-0.00258757	0	0.00783762	0.0157622	0.0240887	0.0259443	0.0299546	0.0386439	0.0411048	0.0431509	0.0473864	0.0501547	0.052359
DeltaDistanceFromCenter	MB390B	20xUAS-CsChrimson-mVenus-attP18	10sLED	AirLED	Arena2	Cam1	20191210T131700	6	0.0196561	0.0123352	0.0134806	0.0178878	0.0151484	0.0146536	0.011853	0.0102231	0.00752432	0.00353526	0.0113149	0.0202686	0.0201152	0.016823	0.0218089	0.0244648	0.0283169	0.0297715	0.0310616	0.0303894	0.0215642	0.0147921	0.0103068	0.00675396	0.00196517	0.00195774	0.00433013	0.00383115	0.00589982	0	0.0118692	0.0301816	0.051778	0.081267	0.107846	0.126034	0.144676	0.154797	0.162853	0.158023	0.153053
DeltaDistanceFromCenter	MB390B	20xUAS-CsChrimson-mVenus-attP18	10sLED	AirLED	Arena2	Cam1	20191217T140750	6	-0.0333082	-0.0278181	-0.0284103	-0.0237555	-0.021278	-0.0167191	-0.0141525	-0.01672	-0.0189781	-0.0175614	-0.011563	-0.00388505	0.00103525	0.00720447	0.00927835	0.0120214	0.0149108	0.0144853	0.0106086	0.0128019	0.0171698	0.0222755	0.0257665	0.0222998	0.015512	0.00751126	0.00146484	-0.00217008	-0.00327013	0	0.00147663	0.00654451	0.00903757	0.0152573	0.0249239	0.0319178	0.0317414	0.031606	0.03017	0.0324375	0.0344004
DeltaDistanceFromCenter	MB390B	20xUAS-CsChrimson-mVenus-attP18	10sLED	AirLED	olfactoryArena1	Cam0	20191217T135737	6	0.0297208	0.0248921	0.0209797	0.0165334	0.00954005	0.0128737	0.00843665	0.00351576	-0.00646199	-0.0162685	-0.0184532	-0.0236531	-0.035881	-0.0385077	-0.0365812	-0.0339753	-0.0424514	-0.0404679	-0.0341415	-0.0350082	-0.0364526	-0.037174	-0.0519292	-0.0500619	-0.0520402	-0.0391819	-0.0288417	-0.0224295	-0.0103332	0	0.0011223	0.000459022	0.00441648	0.00646065	0.0132714	0.0179229	0.0239751	0.0259266	0.0204613	0.01881	0.0208704
DeltaDistanceFromCenter	MB390B	20xUAS-CsChrimson-mVenus-attP18	10sLED	AirLED	olfactoryArena1	Cam0	20191217T141133	6	0.0626422	0.0672428	0.0580131	0.0482202	0.0506614	0.050015	0.0523974	0.0482424	0.0490274	0.0454122	0.0298014	0.025411	-0.0035525	0.0175411	0.022479	0.0185075	0.0138346	0.0246469	0.038402	0.0369316	0.0341601	0.0478448	0.050303	0.0388077	0.0330084	0.0117914	0.0178998	0.0186771	0.00700805	0	-0.0036348	0.00339887	-0.00143724	0.0139836	0.0347129	0.047546	0.0432597	0.0509767	0.0695982	0.0584035	0.0578348
DeltaDistanceFromCenter	MB390B	20xUAS-CsChrimson-mVenus-attP18	10sLED	AirLED	olfactoryArena1	Cam1	20191217T135737	6	0.0170421	0.0214237	0.022733	0.0231785	0.0224839	0.0207641	0.0176503	0.0140232	0.0097921	0.0054714	0.00103357	-0.000613875	-0.0020177	-0.00172253	-0.00337244	-0.00265081	-0.00552489	-0.00957309	-0.00976354	-0.0108334	-0.0106095	-0.00867256	-0.00719422	-0.00530426	-0.00047975	-0.000566711	-0.000841565	0.00225324	0.00331864	0	-0.00218342	0.00130775	0.00735029	0.0164557	0.0292249	0.0420552	0.0528581	0.061342	0.0674178	0.0706133	0.0729637
DeltaDistanceFromCenter	MB390B	20xUAS-CsChrimson-mVenus-attP18	10sLED	AirLED	olfactoryArena1	Cam1	20191217T141133	6	-0.0671231	-0.0776272	-0.0836435	-0.0778046	-0.0678782	-0.0632219	-0.0585198	-0.0418623	-0.0287071	-0.0165089	-0.0091454	-0.00178922	0.006576	0.0177559	0.0222479	0.0236965	0.0310579	0.0262715	0.0149068	0.00488356	-0.00530504	-0.0162057	-0.0268509	-0.0277143	-0.0234151	-0.0197351	-0.0118703	-0.0093128	-0.00427591	0	0.00922711	0.014019	0.0142826	0.0192786	0.0243217	0.0262086	0.0307282	0.0373283	0.0447805	0.0468791	0.041501
DeltaDistanceFromCenter	MB390B	20xUAS-CsChrimson-mVenus-attP18	10sLED	AirLED	Arena2	Cam1	20191217T135618	5	-0.0521135	-0.0468857	-0.0444672	-0.0365677	-0.0283468	-0.0216618	-0.0137064	-0.00881573	-0.00709055	-0.00726748	-0.0159328	-0.0195922	-0.0150859	-0.0144894	-0.0165935	-0.0115432	-0.0143473	-0.00911672	0.00636921	0.0112911	0.0110349	0.0168982	0.0166578	0.0214995	0.0313471	0.0367224	0.0261469	0.0219569	0.0110906	0	0.000598692	0.0046833	0.011182	0.00712898	0.00315376	0.0063214	0.00783927	0.00871138	0.0134921	0.0121812	0.00870218
Cos(Upwind)	MB390B	20xUAS-CsChrimson-mVenus-attP18	10sLED	AirLED	Arena2	Cam0	20191210T131700	6	-0.0824611	-0.0363064	-0.00199233	0.0126487	-0.0140974	0.0308124	0.0632459	0.0193736	0.0745975	0.0872763	0.00572184	-0.0229527	0.0110814	0.0191183	-0.0756879	-0.0849704	-0.0765717	-0.131209	-0.0854588	-0.104988	-0.124799	-0.113247	-0.144432	-0.188333	-0.159118	-0.108899	-0.12083	-0.174162	-0.148963	-0.136288	-0.150025	-0.0814911	0.0564275	0.138992	0.204879	0.306256	0.314857	0.27608	0.328601	0.284064	0.222128
Cos(Upwind)	MB390B	20xUAS-CsChrimson-mVenus-attP18	10sLED	AirLED	Arena2	Cam0	20191217T135618	6	-0.23111	-0.192662	-0.197075	-0.143903	-0.127791	-0.0868233	-0.0253687	0.00436945	0.0075899	0.0798296	0.128313	0.0612142	0.0485407	0.0234462	0.0560827	0.0362105	0.0108915	-0.00878913	-0.0372642	-0.0338508	-0.0211427	-0.0112873	-0.0157978	-0.0754058	-0.0797614	-0.0328826	-0.0211185	-0.0818288	-0.0582232	-0.0845965	-0.0554864	0.0123002	0.270412	0.346303	0.232572	0.168553	0.114194	0.00313847	0.0487134	0.100286	0.0666379
Cos(Upwind)	MB390B	20xUAS-CsChrimson-mVenus-attP18	10sLED	AirLED	Arena2	Cam0	20191217T140750	6	0.0164801	0.0863274	0.0665467	0.083588	0.070538	0.028867	0.0362782	0.0232686	-0.0278047	-0.0355574	0.00173352	0.0256877	-0.00651501	0.019287	0.00360171	0.00391394	0.0348534	0.0301482	0.0317141	0.0266443	0.0259277	0.0572427	0.0588492	0.0392479	0.0397542	0.0322456	-0.00703712	-0.0126334	0.0195021	0.0487374	0.10911	0.190918	0.248413	0.226062	0.260226	0.276767	0.267105	0.276379	0.278806	0.259939	0.262729
Cos(Upwind)	MB390B	20xUAS-CsChrimson-mVenus-attP18	10sLED	AirLED	Arena2	Cam1	20191210T131700	6	-0.103089	-0.143174	-0.0904179	-0.0604464	-0.0951881	-0.0806154	-0.12926	-0.149314	-0.176956	-0.126595	-0.0751172	-0.0810072	-0.100345	-0.170396	-0.153344	-0.114501	-0.118942	-0.118391	-0.137483	-0.162043	-0.180767	-0.175052	-0.148605	-0.184179	-0.19967	-0.19411	-0.15957	-0.138764	-0.148386	-0.174159	-0.0800635	0.0934737	0.183562	0.275282	0.32962	0.375358	0.360644	0.347124	0.2956	0.173798	0.149672
Cos(Upwind)	MB390B	20xUAS-CsChrimson-mVenus-attP18	10sLED	AirLED	Arena2	Cam1	20191217T140750	6	-0.0880932	-0.0511038	-0.0503759	-0.0491753	-0.0715075	-0.0681418	-0.0550836	-0.0925685	-0.0673469	-0.0658181	-0.0508251	-0.0291603	-0.00909071	-0.00173334	-0.0207577	-0.0275604	-0.0218043	-0.0371578	-0.0766936	-0.0453791	-0.0201246	-0.0384399	-0.0465471	-0.100588	-0.142016	-0.118998	-0.0768673	-0.0863859	-0.113368	-0.105487	0.033242	0.173844	0.193784	0.206803	0.177091	0.158049	0.127686	0.127372	0.11771	0.0865614	0.0614728
Cos(Upwind)	MB390B	20xUAS-CsChrimson-mVenus-attP18	10sLED	AirLED	olfactoryArena1	Cam0	20191217T135737	6	-0.0956223	-0.0792814	-0.111946	-0.124458	-0.0714365	0.00301965	0.0101663	-0.0402668	-0.0869249	-0.0433857	0.0370593	0.0721339	0.0234977	0.0349087	0.0151272	0.0260863	0.0384329	0.0517193	0.01391	-0.0469396	-0.0440021	0.00951688	8.2512e-05	0.00830139	-0.0413681	-0.0567886	-0.00655946	0.0246625	0.0710708	0.0204977	-0.0373199	0.00268141	0.00283949	0.071317	0.135226	0.0970425	0.0998939	0.106956	0.0715806	0.0772073	0.105678
Cos(Upwind)	MB390B	20xUAS-CsChrimson-mVenus-attP18	10sLED	AirLED	olfactoryArena1	Cam0	20191217T141133	6	-0.0710867	-0.101059	-0.0782646	-0.119696	-0.11238	-0.119166	-0.0767345	-0.0871884	-0.118477	-0.0818041	-0.0617134	-0.0873944	-0.097059	-0.135986	-0.104268	-0.0766685	-0.0141198	-0.0736373	-0.0782986	-0.0525144	-0.0844515	-0.00461157	-0.0841487	-0.150892	-0.112523	-0.132021	-0.115352	-0.120314	-0.0914603	-0.149397	-0.165974	0.0194575	0.159505	0.211824	0.226838	0.15911	0.119996	0.0999936	0.0809373	-0.000773846	0.0465183
Cos(Upwind)	MB390B	20xUAS-CsChrimson-mVenus-attP18	10sLED	AirLED	olfactoryArena1	Cam1	20191217T135737	6	-0.0914547	-0.0900048	-0.0891495	-0.0839109	-0.110685	-0.150463	-0.136799	-0.106171	-0.0932685	-0.102389	-0.110267	-0.125561	-0.117161	-0.0988948	-0.0962217	-0.100112	-0.136298	-0.13436	-0.114143	-0.103163	-0.0952634	-0.0930749	-0.0980486	-0.0922377	-0.063537	-0.0864085	-0.107493	-0.106824	-0.124875	-0.167594	-0.138783	0.00483139	0.0987751	0.197447	0.256549	0.267753	0.263527	0.308933	0.287307	0.23563	0.230443
Cos(Upwind)	MB390B	20xUAS-CsChrimson-mVenus-attP18	10sLED	AirLED	olfactoryArena1	Cam1	20191217T141133	6	-0.0634043	-0.112144	-0.0907079	-0.0644497	-0.00283065	-0.0306517	0.00381405	0.046279	0.0572087	0.0576005	0.0144886	0.01341	0.0405196	0.0793671	-0.000332814	-0.00143394	-0.0243581	-0.0825682	-0.0840508	-0.046472	-0.0263274	-0.0768989	-0.0842681	-0.0320201	0.0303198	0.0284208	0.00632718	-0.0379429	-0.0133119	-0.0122354	0.0798251	0.199835	0.159765	0.131302	0.16606	0.167166	0.106293	0.12994	0.0879504	0.0424415	0.00248774
Cos(Upwind)	MB390B	20xUAS-CsChrimson-mVenus-attP18	10sLED	AirLED	Arena2	Cam1	20191217T135618	5	-0.00793135	0.0306319	0.0209885	-0.00527402	0.00257258	-0.0207556	-0.0417431	-0.0588819	-0.0407157	-0.0635729	-0.0672692	-0.0559271	-0.0455639	-0.101464	-0.0537926	0.0235777	0.0438136	0.0390763	0.102109	0.135049	0.0351761	0.0215289	0.00697564	-0.0236589	-0.0219616	-0.00570279	0.00729138	-0.00414566	-0.00827886	-0.0224075	0.0479147	0.122056	0.074777	0.136132	0.139583	0.157349	0.0789321	0.0805901	0.0634976	0.0593095	0.115304
DeltaAnglefroPreviousFrame	MB390B	20xUAS-CsChrimson-mVenus-attP18	10sLED	AirLED	Arena2	Cam0	20191210T131700	6	114.352	106.6	109.096	103.243	107.582	109.525	103.732	107.924	94.9695	95.1194	115.474	103.463	117.79	118.244	120.559	111.034	117.371	110.156	97.5958	88.814	104.082	98.7192	101.04	105.948	102.648	99.8963	109.967	104.122	105.875	105.693	86.5766	134.465	104.083	105.527	147.203	128.719	124.23	117.193	115.794	108.729	112.335
DeltaAnglefroPreviousFrame	MB390B	20xUAS-CsChrimson-mVenus-attP18	10sLED	AirLED	Arena2	Cam0	20191217T135618	6	122.303	136.095	127.615	125.476	116.704	111.106	120.055	123.507	123.45	122.339	122.371	134.529	143.335	139.548	133.6	129.297	131.43	120.28	121.6	121.56	114.935	116.176	124.545	122.898	126.686	120.132	111.857	108.022	106.149	130.029	105.725	176.116	169.569	141.913	139.89	124.03	113.082	107.778	115.512	97.306	106.692
DeltaAnglefroPreviousFrame	MB390B	20xUAS-CsChrimson-mVenus-attP18	10sLED	AirLED	Arena2	Cam0	20191217T140750	6	94.474	86.3887	93.9226	85.5642	91.0347	100.234	83.608	89.8318	90.6655	90.5728	94.7329	91.9786	91.8151	93.2563	97.7424	98.5144	99.3955	96.0291	87.2973	89.5795	91.4302	85.4714	93.6206	91.1659	86.7743	111.115	94.8672	104.919	96.7005	96.9076	97.8802	156.235	137.281	123.272	105.538	108.762	103.185	99.942	90.8597	79.1966	91.474
DeltaAnglefroPreviousFrame	MB390B	20xUAS-CsChrimson-mVenus-attP18	10sLED	AirLED	Arena2	Cam1	20191210T131700	6	105.055	84.6595	99.341	93.7275	91.6517	82.4292	78.5136	88.7876	86.5028	84.6784	83.548	92.1324	88.3235	91.2168	91.7956	77.7123	97.7938	91.7582	96.3962	84.3352	83.8158	76.595	89.8745	97.1107	97.5158	92.1625	95.7399	86.9042	87.7865	86.7636	139.56	120.461	111.578	127.339	121.586	109.67	104.726	102.692	106.553	99.0259	100.115
DeltaAnglefroPreviousFrame	MB390B	20xUAS-CsChrimson-mVenus-attP18	10sLED	AirLED	Arena2	Cam1	20191217T140750	6	90.9372	102.871	110.974	98.4135	119.206	100.569	100.923	106.086	113.004	111.737	106.554	114.398	106.679	111.486	107.861	104.023	105.755	116.708	116.768	103.049	113.795	103.871	115.913	105.2	103.332	107.651	98.5067	102.134	101.91	91.5595	212.83	137.214	137.713	125.369	103.972	91.9871	92.4604	106.828	101.059	101.822	102.168
DeltaAnglefroPreviousFrame	MB390B	20xUAS-CsChrimson-mVenus-attP18	10sLED	AirLED	olfactoryArena1	Cam0	20191217T135737	6	100.633	107.959	118.105	102.344	105.56	107.255	108.979	97.5553	87.2237	107.461	83.3044	90.4411	89.5565	99.6187	111.648	107.18	101.094	92.1862	88.3348	95.7797	96.6284	96.3538	101.763	102.616	101.491	104.775	88.0127	88.5702	104.578	88.7629	95.7234	189.01	134.554	147.936	119.809	115.153	112.62	93.2821	89.9787	99.746	81.8951
DeltaAnglefroPreviousFrame	MB390B	20xUAS-CsChrimson-mVenus-attP18	10sLED	AirLED	olfactoryArena1	Cam0	20191217T141133	6	118.01	128.916	133.644	112.222	122.473	103.666	117.667	130.14	140.375	110.849	142.101	139.282	157.68	110.135	109.477	121.935	114.909	144.185	122.405	124.502	117.241	123.482	126.674	116.396	118.798	125.5	130.401	119.345	112.763	106.369	121.306	210.728	161.591	153.733	135.652	125.61	101.544	112.349	111.892	111.776	121.013
DeltaAnglefroPreviousFrame	MB390B	20xUAS-CsChrimson-mVenus-attP18	10sLED	AirLED	olfactoryArena1	Cam1	20191217T135737	6	85.0651	73.3068	69.2333	74.3642	72.4851	67.7467	70.1536	75.0108	64.6732	72.153	72.6931	72.5776	71.3766	67.5632	73.6239	75.3877	63.1236	66.8906	66.6031	64.4256	68.1078	67.0726	63.3203	63.0701	70.6071	72.2807	68.6397	65.1223	74.2855	71.912	160.481	120.122	117.684	128.528	102.024	107.301	88.0822	90.3221	80.1744	83.207	83.8748
DeltaAnglefroPreviousFrame	MB390B	20xUAS-CsChrimson-mVenus-attP18	10sLED	AirLED	olfactoryArena1	Cam1	20191217T141133	6	109.755	117.407	129.434	118.375	127.275	120.021	131.13	110.004	133.431	130.766	128.998	121.7	123.545	127.321	113.868	120.516	112.006	112.454	112.181	115.652	103.067	113.685	106.415	92.1248	95.2783	113.34	97.6605	103.657	106.421	111.921	175.41	145.589	120.694	111.084	130.201	112.071	102.882	111.19	88.1355	105.042	75.9226
DeltaAnglefroPreviousFrame	MB390B	20xUAS-CsChrimson-mVenus-attP18	10sLED	AirLED	Arena2	Cam1	20191217T135618	5	89.1504	97.1176	118.523	110.723	112.028	92.8661	101.722	103.708	93.46	91.1078	93.7107	100.579	106.852	90.1271	97.9716	99.3771	85.2826	87.2247	107.439	104.218	108.287	110.038	100.396	100.329	124.834	135.625	106.528	92.5809	102.732	116.312	174.921	149.623	151.216	115.37	106.133	96.5419	78.6592	83.9698	89.3109	77.6683	113.088
WalkingDistanceFromPreviousFrame	MB390B	20xUAS-CsChrimson-mVenus-attP18	10sLED	AirLED	Arena2	Cam0	20191210T131700	6	2.12371	2.50077	2.48635	2.57331	2.43349	2.71938	2.36821	2.28161	2.43229	2.17988	1.95887	1.97121	1.83333	1.79547	2.0488	2.03952	2.08337	2.00443	2.03341	1.94165	1.88705	1.99936	2.17683	2.20357	2.06112	2.13463	2.20271	2.17499	2.15955	2.28379	2.0817	2.26487	1.85788	2.01223	2.44875	2.40955	2.36859	2.24281	1.79741	1.74724	1.62732
WalkingDistanceFromPreviousFrame	MB390B	20xUAS-CsChrimson-mVenus-attP18	10sLED	AirLED	Arena2	Cam0	20191217T135618	6	2.09959	2.34441	2.51817	2.56548	2.64775	2.42386	2.23129	2.45396	2.5274	2.30049	2.33094	2.40308	2.42967	2.43408	2.45505	2.29609	2.27368	2.33761	2.26627	2.21467	2.28921	2.00755	2.04582	2.34167	2.46296	2.47568	2.11685	2.02933	1.96059	2.27997	2.122	2.42237	1.50982	1.95221	1.90788	1.59366	1.3633	1.46009	1.39767	1.37034	1.32397
WalkingDistanceFromPreviousFrame	MB390B	20xUAS-CsChrimson-mVenus-attP18	10sLED	AirLED	Arena2	Cam0	20191217T140750	6	1.51325	1.63944	1.69442	1.53375	1.40767	1.43481	1.42437	1.56062	1.46734	1.49833	1.54281	1.52193	1.57803	1.57245	1.52293	1.64074	1.59929	1.44193	1.60359	1.61489	1.5957	1.6593	1.80454	1.77623	1.64161	1.71825	1.74433	1.76841	1.69018	1.76136	1.67683	1.95461	1.28756	1.34511	1.20875	1.19074	1.04323	0.991013	1.00812	0.943353	0.899986
WalkingDistanceFromPreviousFrame	MB390B	20xUAS-CsChrimson-mVenus-attP18	10sLED	AirLED	Arena2	Cam1	20191210T131700	6	1.83693	2.21269	2.05133	2.07673	1.91928	1.77775	1.79279	1.79072	1.74437	1.74072	1.77244	1.83004	1.75052	1.81536	1.68188	1.66645	1.56389	1.68256	1.71346	1.82595	1.72332	1.53023	1.65592	1.76536	1.82718	1.97119	1.79755	1.85963	1.6515	1.75255	2.02949	1.7014	2.02915	2.17587	1.97668	2.01287	1.93715	1.77891	1.65827	1.60265	1.55806
WalkingDistanceFromPreviousFrame	MB390B	20xUAS-CsChrimson-mVenus-attP18	10sLED	AirLED	Arena2	Cam1	20191217T140750	6	1.17646	1.37283	1.37204	1.21256	1.3755	1.4676	1.25525	1.28682	1.34026	1.46347	1.53544	1.51609	1.50396	1.63374	1.44491	1.43742	1.38256	1.38967	1.42984	1.46245	1.4109	1.39564	1.5183	1.38279	1.43813	1.40189	1.35839	1.43852	1.47362	1.31555	1.84767	1.33201	1.38164	1.41058	1.26461	1.06997	1.04512	1.0129	1.04766	1.0922	1.08205
WalkingDistanceFromPreviousFrame	MB390B	20xUAS-CsChrimson-mVenus-attP18	10sLED	AirLED	olfactoryArena1	Cam0	20191217T135737	6	1.39631	1.44291	1.56259	1.4902	1.40225	1.34412	1.5742	1.46306	1.40571	1.5437	1.53404	1.49484	1.55495	1.58785	1.43661	1.59277	1.57605	1.43698	1.50625	1.763	1.74497	1.71518	1.66358	1.6971	1.71607	1.83193	1.47374	1.38652	1.46899	1.44747	1.47262	2.21788	1.77158	2.04852	2.16122	1.85333	1.77989	1.45595	1.2035	1.10963	1.28491
WalkingDistanceFromPreviousFrame	MB390B	20xUAS-CsChrimson-mVenus-attP18	10sLED	AirLED	olfactoryArena1	Cam0	20191217T141133	6	1.7435	2.2465	2.23109	1.73169	1.80209	1.77005	1.93767	1.96181	2.18203	1.81863	1.93407	1.92008	2.0523	1.7576	1.76638	1.83528	1.92243	2.22039	1.86103	2.02355	1.9886	2.08799	1.98025	1.76423	1.75639	1.92859	1.90271	2.16128	1.88981	1.90513	1.86579	2.60333	1.80879	2.02543	2.03294	1.87723	1.64715	1.66706	1.64846	1.5063	1.38475
WalkingDistanceFromPreviousFrame	MB390B	20xUAS-CsChrimson-mVenus-attP18	10sLED	AirLED	olfactoryArena1	Cam1	20191217T135737	6	0.823057	0.943285	0.875606	0.947077	0.942187	0.874773	0.919944	1.00382	0.91469	0.970219	1.03646	1.05681	1.02186	1.03693	1.10025	1.05049	0.951108	0.821417	0.910811	0.892319	0.96853	0.901429	0.912356	0.869002	1.00492	0.989459	0.961971	0.928827	0.960329	0.967212	1.49498	1.23906	1.40444	1.61168	1.45971	1.36001	1.24329	1.14309	1.04018	0.949151	0.953035
WalkingDistanceFromPreviousFrame	MB390B	20xUAS-CsChrimson-mVenus-attP18	10sLED	AirLED	olfactoryArena1	Cam1	20191217T141133	6	1.34767	1.59282	1.40674	1.56933	1.72243	1.83701	1.86365	1.74122	1.85657	1.7733	1.76722	1.54121	1.5357	1.61585	1.75861	1.76006	1.60516	1.61073	1.58025	1.77266	1.60154	1.7944	1.72549	1.70812	1.51767	1.71026	1.54746	1.75587	1.75236	1.91165	2.07264	1.20858	1.56497	1.53798	1.12534	1.0977	1.09961	1.13798	1.15961	0.969262	0.897683
WalkingDistanceFromPreviousFrame	MB390B	20xUAS-CsChrimson-mVenus-attP18	10sLED	AirLED	Arena2	Cam1	20191217T135618	5	1.39985	1.87244	1.60472	1.64054	1.63841	1.60056	1.23107	1.32518	1.35455	1.43677	1.48492	1.22911	1.54017	1.65014	1.79231	1.54447	1.70612	1.74684	1.699	1.52757	1.54741	1.53358	1.36579	1.56846	1.90593	1.87903	1.80238	1.98353	1.98015	1.94453	2.1375	1.69657	1.81719	1.42207	1.13241	1.13318	1.13667	0.989372	1.15502	0.991047	1.30354
revisit-10mmOut3mmIn-15s	MB390B	20xUAS-CsChrimson-mVenus-attP18	10sLED	AirLED	Arena2	Cam0	20191210T131700	6	0.0732949	0.0901883	0.0794872	0.0808557	0.0818376	0.0874579	0.115491	0.115491	0.0936966	0.114291	0.126435	0.143101	0.147975	0.180228	0.188076	0.220818	0.199252	0.171337	0.181071	0.171337	0.178938	0.175292	0.165904	0.181288	0.180094	0.15443	0.153312	0.158827	0.15928	0.172352	0.167549	0.185881	0.188192	0.164582	0.140611	0.142693	0.164957	0.156662	0.164935	0.178875	0.167737
revisit-10mmOut3mmIn-15s	MB390B	20xUAS-CsChrimson-mVenus-attP18	10sLED	AirLED	Arena2	Cam0	20191217T135618	6	0.179411	0.146154	0.124359	0.125641	0.138462	0.151282	0.138462	0.112821	0.0897436	0.0935897	0.0653846	0.0666667	0.10641	0.123077	0.10641	0.10641	0.130769	0.151282	0.148718	0.129487	0.108974	0.119231	0.158974	0.178205	0.191403	0.201282	0.224359	0.265385	0.260256	0.214103	0.164232	0.135897	0.14359	0.164103	0.153846	0.139744	0.146154	0.180769	0.165385	0.161538	0.173077
revisit-10mmOut3mmIn-15s	MB390B	20xUAS-CsChrimson-mVenus-attP18	10sLED	AirLED	Arena2	Cam0	20191217T140750	6	0.0778442	0.146698	0.118403	0.0954861	0.0725694	0.0579861	0.0584491	0.0830607	0.0820833	0.0719444	0.0561111	0.0635417	0.076875	0.0777778	0.0619444	0.0652778	0.0475694	0.0381944	0.0569772	0.057082	0.0850694	0.0865972	0.0757639	0.0848611	0.0902083	0.0861111	0.0850694	0.112222	0.108264	0.100478	0.0978472	0.108607	0.0881944	0.0948611	0.100139	0.0932521	0.078125	0.069375	0.0596528	0.0707639	0.0778105
revisit-10mmOut3mmIn-15s	MB390B	20xUAS-CsChrimson-mVenus-attP18	10sLED	AirLED	Arena2	Cam1	20191210T131700	6	0.0923836	0.0731958	0.0713508	0.0787523	0.0771553	0.0855501	0.0860806	0.0824475	0.0712362	0.0856077	0.0804088	0.0966977	0.104045	0.0886769	0.0988358	0.103651	0.116364	0.130538	0.137317	0.129019	0.111788	0.103967	0.126344	0.140106	0.136282	0.133364	0.146959	0.162098	0.16845	0.168074	0.138935	0.136596	0.127083	0.120023	0.122361	0.102594	0.0942161	0.109527	0.10691	0.135652	0.143041
revisit-10mmOut3mmIn-15s	MB390B	20xUAS-CsChrimson-mVenus-attP18	10sLED	AirLED	Arena2	Cam1	20191217T140750	6	0.0679416	0.0764694	0.0721316	0.0934481	0.0875302	0.0792874	0.0725242	0.0784722	0.1016	0.106975	0.101781	0.0968297	0.101691	0.0726751	0.0611413	0.0686594	0.0694532	0.0637983	0.0702947	0.0828804	0.10612	0.112107	0.112563	0.112235	0.112621	0.112228	0.0877114	0.068901	0.0662388	0.0562198	0.0510254	0.0604771	0.0843158	0.0833031	0.0929023	0.0947761	0.0995773	0.0933778	0.0934797	0.0929093	0.102751
revisit-10mmOut3mmIn-15s	MB390B	20xUAS-CsChrimson-mVenus-attP18	10sLED	AirLED	olfactoryArena1	Cam0	20191217T135737	6	0.0918247	0.0856207	0.082706	0.0612732	0.081517	0.0895129	0.0958985	0.0942907	0.0970539	0.0992349	0.114983	0.107468	0.101399	0.0728833	0.0715039	0.0891332	0.0872467	0.100092	0.11133	0.115634	0.125653	0.129586	0.0976858	0.0902864	0.0788862	0.0789483	0.103426	0.125092	0.11501	0.113346	0.107412	0.0791546	0.0802304	0.104683	0.123796	0.137854	0.149735	0.15074	0.10598	0.0924673	0.127239
revisit-10mmOut3mmIn-15s	MB390B	20xUAS-CsChrimson-mVenus-attP18	10sLED	AirLED	olfactoryArena1	Cam0	20191217T141133	6	0.0847832	0.128713	0.0990192	0.0862851	0.101123	0.113888	0.123659	0.109492	0.106574	0.122554	0.104954	0.132669	0.122099	0.142262	0.127309	0.110156	0.149633	0.150333	0.150254	0.14319	0.166277	0.202799	0.166862	0.18368	0.157113	0.15579	0.132247	0.139347	0.117243	0.100031	0.0773724	0.0823306	0.101442	0.0966653	0.12703	0.11995	0.138655	0.140109	0.114563	0.102986	0.129005
revisit-10mmOut3mmIn-15s	MB390B	20xUAS-CsChrimson-mVenus-attP18	10sLED	AirLED	olfactoryArena1	Cam1	20191217T135737	6	0.0469824	0.0403316	0.0354956	0.0390783	0.0323548	0.031976	0.0262942	0.0229009	0.0304609	0.0366319	0.0404271	0.0442001	0.0586836	0.0663571	0.0556859	0.0592083	0.0550505	0.0545946	0.052556	0.0535354	0.0665768	0.0742684	0.0703069	0.0753748	0.0798871	0.0681065	0.0669289	0.0717798	0.0872434	0.0687611	0.0589108	0.0571097	0.0423049	0.0469249	0.0313131	0.0263072	0.0413829	0.036824	0.0268419	0.0269014	0.0382372
revisit-10mmOut3mmIn-15s	MB390B	20xUAS-CsChrimson-mVenus-attP18	10sLED	AirLED	olfactoryArena1	Cam1	20191217T141133	6	0.0704643	0.0701435	0.0559829	0.0722597	0.049336	0.031296	0.0275848	0.0416821	0.0510536	0.0485491	0.025922	0.0369475	0.0525031	0.0563492	0.054243	0.0659135	0.0894724	0.0777473	0.0904945	0.0743651	0.0589744	0.0613553	0.0732601	0.113535	0.119444	0.0944608	0.0661172	0.0582784	0.0768254	0.074707	0.102288	0.123846	0.12016	0.10513	0.125588	0.139748	0.131323	0.114133	0.0975923	0.0800929	0.0759793
revisit-10mmOut3mmIn-15s	MB390B	20xUAS-CsChrimson-mVenus-attP18	10sLED	AirLED	Arena2	Cam1	20191217T135618	5	0.116932	0.127377	0.11798	0.148036	0.124414	0.110645	0.109622	0.123593	0.13554	0.126537	0.111651	0.104141	0.101799	0.126891	0.135476	0.161639	0.142669	0.135751	0.150732	0.16597	0.164262	0.159713	0.163968	0.169909	0.154642	0.162018	0.153964	0.127067	0.13085	0.0972845	0.0996223	0.115237	0.156935	0.174665	0.207782	0.210378	0.214939	0.208565	0.189076	0.171994	0.154501
DeltaDistanceFromCenter	SS01262	20xUAS-CsChrimson-mVenus-attP18	10sLED	AirLED	Arena2	Cam0	20191205T180850	6	-0.0616299	-0.0504189	-0.0455469	-0.0404264	-0.0361604	-0.031353	-0.024826	-0.0139801	-0.0119726	-0.0109399	-0.0208198	-0.0278593	-0.0213298	-0.0180555	-0.01531	-0.0128955	-0.0105151	-0.00885979	-0.00290919	0.00253912	0.00482696	0.000541468	-0.00406204	-0.00167572	-0.000748255	-0.00167326	-0.00192943	-0.00119319	-0.00121732	0	0.00543978	0.00345034	0.0081937	0.0163427	0.0257714	0.0421804	0.0595395	0.0679208	0.0690284	0.0708152	0.0589265
DeltaDistanceFromCenter	SS01262	20xUAS-CsChrimson-mVenus-attP18	10sLED	AirLED	Arena2	Cam0	20191210T170124	6	0.0375825	0.0349371	0.0309009	0.0241913	0.0211802	0.0151543	0.00610621	-0.00516583	-0.0142804	-0.0140653	-0.0170601	-0.0264061	-0.0314745	-0.0275023	-0.0288133	-0.0309073	-0.0309833	-0.0335052	-0.0367951	-0.0342451	-0.0228922	-0.00960463	0.00485311	0.011495	0.0108312	0.00922222	0.00597718	0.00128795	0.000491217	0	-0.00462148	-0.000319926	0.0170053	0.0520148	0.100524	0.1512	0.182836	0.197444	0.199132	0.206702	0.207777
DeltaDistanceFromCenter	SS01262	20xUAS-CsChrimson-mVenus-attP18	10sLED	AirLED	Arena2	Cam0	20200225T130014	6	-0.0944323	-0.0985964	-0.101338	-0.0969839	-0.104199	-0.104015	-0.0996433	-0.0975308	-0.0932779	-0.082723	-0.0709848	-0.0659601	-0.062093	-0.0516843	-0.04846	-0.0499503	-0.051079	-0.0404554	-0.0272251	-0.0200047	-0.0142129	-0.0030356	-0.0025436	-0.0139331	-0.0192786	-0.0222969	-0.0240265	-0.016959	-0.00474182	0	0.00613237	0.0108385	0.00552644	0.00719086	0.0140651	0.0129637	0.0166519	0.0266521	0.0295326	0.0306848	0.0236243
DeltaDistanceFromCenter	SS01262	20xUAS-CsChrimson-mVenus-attP18	10sLED	AirLED	Arena2	Cam1	20191205T180850	6	0.022359	0.0175225	0.0126298	0.00214219	-0.00894244	-0.0116576	-0.0102088	-0.0218157	-0.0341163	-0.0409213	-0.0388649	-0.029647	-0.0278577	-0.0255013	-0.0196483	-0.0198031	-0.0146415	-0.0102355	-0.00524585	0.00170459	0.0046935	0.00656936	0.00402494	0.00729839	0.00444048	0.00364782	0.00393351	0.00262958	0.00292056	0	0.00489875	0.0203685	0.0413448	0.0703505	0.100436	0.125465	0.143057	0.145364	0.144991	0.146023	0.137735
DeltaDistanceFromCenter	SS01262	20xUAS-CsChrimson-mVenus-attP18	10sLED	AirLED	Arena2	Cam1	20191210T170124	6	0.0279157	0.0183942	0.0163156	0.0183275	0.0168306	0.0166113	0.011791	0.0126278	0.016444	0.010117	0.00787266	0.0174499	0.0272682	0.0330071	0.0397532	0.0460247	0.0424895	0.0274245	0.0272361	0.031329	0.0167396	0.0153388	0.0220544	0.029918	0.0293344	0.0182836	0.00532069	0.0025866	-0.00273402	0	0.00270651	0.0164479	0.0376348	0.0532276	0.0660587	0.08252	0.0987077	0.112483	0.113826	0.118209	0.122023
DeltaDistanceFromCenter	SS01262	20xUAS-CsChrimson-mVenus-attP18	10sLED	AirLED	Arena2	Cam1	20200225T130014	6	0.0205054	0.0120998	0.00183363	-0.00302815	-0.00859816	-0.00504255	0.00516327	0.0179796	0.0192218	0.0213511	0.0285005	0.0250465	0.0144392	0.0120583	0.0054253	-0.00213217	0.00140846	0.00309449	0.00389205	0.00239295	-0.00511889	-0.00141651	0.00270581	0.00617918	0.0058659	-0.000777508	0.00194292	0.00354959	0.00122102	0	0.00518946	0.0134551	0.0110689	0.0192784	0.0484214	0.072046	0.0684359	0.0644264	0.0558491	0.0570281	0.055096
DeltaDistanceFromCenter	SS01262	20xUAS-CsChrimson-mVenus-attP18	10sLED	AirLED	olfactoryArena1	Cam0	20191205T181232	6	0.0496789	0.0568331	0.0567326	0.0558014	0.0558976	0.0611425	0.069501	0.0754676	0.0703213	0.0620345	0.0611895	0.0616944	0.0522792	0.0461569	0.0472966	0.0487396	0.0482504	0.0539618	0.0572254	0.0571405	0.0534852	0.0447192	0.0356059	0.0272959	0.0145287	0.00528331	-0.00334951	-0.00620965	-0.00829201	0	-0.00386326	0.000209541	0.0159531	0.0450952	0.0825007	0.118922	0.150494	0.157659	0.168059	0.170193	0.168855
DeltaDistanceFromCenter	SS01262	20xUAS-CsChrimson-mVenus-attP18	10sLED	AirLED	olfactoryArena1	Cam0	20191205T183645	6	-0.000753064	-0.000439542	-0.00391318	0.00234162	0.00119219	-0.00353929	-0.0036401	0.00127075	0.0051013	0.00450049	0.00172221	0.00120428	0.00372966	-0.00260663	-0.00136298	0.00347531	0.00432821	0.00454815	0.00163829	-0.00414702	0.00550585	0.00738697	0.0153034	0.0237927	0.0288895	0.0244301	0.0194078	0.0140048	0.00498678	0	0.000365289	-0.00225997	0.0130127	0.022161	0.0292318	0.0351039	0.0502806	0.0671162	0.075951	0.0818604	0.0781041
DeltaDistanceFromCenter	SS01262	20xUAS-CsChrimson-mVenus-attP18	10sLED	AirLED	olfactoryArena1	Cam1	20191205T181232	6	0.0326425	0.032687	0.0302585	0.0259919	0.0209382	0.0179351	0.0186627	0.0206278	0.0194237	0.0192445	0.0168118	0.0159795	0.0142507	0.0114315	0.0119203	0.00976149	0.0067271	0.000326138	-0.00586779	-0.01204	-0.0133612	-0.0156636	-0.0181469	-0.0162333	-0.0146217	-0.0108239	-0.0128613	-0.0098382	-0.00404684	0	0.00395403	0.0128682	0.0250687	0.04512	0.067224	0.0883697	0.100451	0.109934	0.116114	0.117181	0.117168
DeltaDistanceFromCenter	SS01262	20xUAS-CsChrimson-mVenus-attP18	10sLED	AirLED	olfactoryArena1	Cam1	20191205T183645	6	-0.0072521	-0.000931059	-0.00134593	-0.00959897	-0.0177717	-0.0143998	-0.0142996	-0.014141	-0.012316	-0.00541859	-0.000641428	0.000727882	0.00226328	0.00434618	0.00515972	0.0103185	0.0112685	0.0131905	0.0120089	0.0124535	0.0105907	0.0119684	0.0141585	0.0175701	0.0187659	0.0142228	0.00620079	-0.00197201	-0.00149148	0	0.00284381	0.0182014	0.0406966	0.0671118	0.0970784	0.122427	0.143763	0.154676	0.158735	0.16105	0.168026
Cos(Upwind)	SS01262	20xUAS-CsChrimson-mVenus-attP18	10sLED	AirLED	Arena2	Cam0	20191205T180850	6	-0.110878	-0.010239	-0.000695259	-0.0276642	-0.0412911	0.0234695	0.010371	0.0231719	-0.026857	-0.0620761	-0.110235	-0.0606361	0.017685	0.026432	0.00300671	-0.0161196	-0.0557163	-0.0590841	-0.0445466	-0.00486271	-0.000951258	-0.000692871	-0.0553683	-0.048982	-0.0390716	-0.0678511	-0.0400996	0.00711063	-0.00768241	0.00560853	-0.00507885	0.03792	0.0610121	0.098376	0.140307	0.179809	0.206438	0.22674	0.176312	0.163674	0.0946084
Cos(Upwind)	SS01262	20xUAS-CsChrimson-mVenus-attP18	10sLED	AirLED	Arena2	Cam0	20191210T170124	6	-0.152773	-0.136734	-0.164949	-0.151034	-0.172959	-0.176933	-0.207453	-0.215246	-0.194369	-0.119132	-0.149243	-0.176319	-0.165788	-0.156287	-0.167033	-0.208867	-0.178326	-0.199722	-0.1324	-0.112131	-0.054665	-0.0169502	-0.0171144	-0.112204	-0.103059	-0.106097	-0.0971754	-0.11669	-0.130871	-0.14625	-0.090931	0.0487764	0.232172	0.320652	0.343961	0.341182	0.260698	0.215331	0.211749	0.170453	0.109254
Cos(Upwind)	SS01262	20xUAS-CsChrimson-mVenus-attP18	10sLED	AirLED	Arena2	Cam0	20200225T130014	6	-0.028761	0.00434199	0.0420807	0.0164942	-0.0109134	0.0313205	0.0569488	0.0694527	0.0777344	0.0846155	0.0811103	0.032724	0.0126487	0.0619847	0.0546572	0.0626464	0.0161885	0.128884	0.081207	0.00616506	-0.0150058	0.00690236	-0.0462878	-0.0404888	-0.0488297	-0.0653261	-0.0152991	0.0160377	0.0209652	0.0482865	0.0852802	0.11423	0.126944	0.156581	0.147977	0.113338	0.0932476	0.0781333	0.0326462	0.0233905	0.0432072
Cos(Upwind)	SS01262	20xUAS-CsChrimson-mVenus-attP18	10sLED	AirLED	Arena2	Cam1	20191205T180850	6	-0.121958	-0.0914974	-0.0787235	-0.093519	-0.0862274	-0.0501507	-0.126079	-0.127956	-0.18181	-0.177552	-0.0968461	-0.0901851	-0.105276	-0.0657217	-0.0951001	-0.105572	-0.0753224	-0.0957268	-0.108847	-0.0589307	-0.076994	-0.0896294	-0.0767612	-0.104809	-0.0975152	-0.0764155	-0.0770017	-0.101427	-0.10658	-0.11672	-0.0305104	0.166048	0.329424	0.332398	0.325364	0.294749	0.198864	0.16235	0.118686	0.0237191	0.046294
Cos(Upwind)	SS01262	20xUAS-CsChrimson-mVenus-attP18	10sLED	AirLED	Arena2	Cam1	20191210T170124	6	-0.128124	-0.193878	-0.159292	-0.19054	-0.166151	-0.172702	-0.195758	-0.173974	-0.184381	-0.158784	-0.0713475	-0.0540976	-0.0624012	-0.072167	-0.0940283	-0.0541563	-0.143253	-0.153882	-0.136233	-0.186061	-0.252883	-0.215633	-0.162837	-0.212069	-0.219303	-0.25053	-0.205091	-0.206505	-0.242223	-0.239894	-0.0548456	0.119355	0.183528	0.19135	0.163499	0.240759	0.216503	0.19041	0.137425	0.0513258	0.0671359
Cos(Upwind)	SS01262	20xUAS-CsChrimson-mVenus-attP18	10sLED	AirLED	Arena2	Cam1	20200225T130014	6	-0.123149	-0.191699	-0.182439	-0.121999	-0.0871361	-0.0508724	-0.0293445	-0.0867114	-0.0962008	-0.0587377	-0.0408046	-0.0693796	-0.0890537	-0.0883346	-0.084451	-0.0795611	-0.115664	-0.12626	-0.109483	-0.144173	-0.0612199	0.0136894	-0.0289088	-0.0737894	-0.0877122	-0.111359	-0.0815792	-0.0435224	-0.0355214	-0.00950834	0.048827	0.0197616	0.130903	0.110042	0.159962	0.154521	0.0851314	0.0124906	0.000242475	-0.00377325	0.024842
Cos(Upwind)	SS01262	20xUAS-CsChrimson-mVenus-attP18	10sLED	AirLED	olfactoryArena1	Cam0	20191205T181232	6	-0.027286	-0.055856	-0.0938388	-0.148717	-0.157756	-0.162306	-0.161931	-0.157782	-0.17263	-0.220223	-0.202975	-0.218289	-0.277414	-0.23331	-0.179522	-0.121813	-0.097646	-0.142146	-0.106246	-0.138096	-0.201403	-0.236346	-0.219535	-0.206603	-0.249213	-0.256338	-0.257596	-0.2054	-0.175114	-0.146484	-0.139804	-0.122897	0.0943393	0.309802	0.301439	0.311179	0.317647	0.248427	0.219243	0.136654	0.0627431
Cos(Upwind)	SS01262	20xUAS-CsChrimson-mVenus-attP18	10sLED	AirLED	olfactoryArena1	Cam0	20191205T183645	6	-0.106821	-0.188464	-0.143992	-0.0922603	-0.175941	-0.206763	-0.151078	-0.0900892	-0.0983339	-0.125168	-0.147767	-0.098067	-0.1175	-0.193381	-0.158541	-0.136058	-0.153075	-0.184174	-0.198085	-0.206348	-0.137649	-0.144943	-0.132806	-0.126882	-0.1412	-0.171388	-0.142797	-0.159137	-0.205948	-0.187547	-0.13943	-0.072937	0.137356	0.195672	0.188216	0.158466	0.199325	0.172048	0.132763	0.0676083	0.0144237
Cos(Upwind)	SS01262	20xUAS-CsChrimson-mVenus-attP18	10sLED	AirLED	olfactoryArena1	Cam1	20191205T181232	6	-0.190933	-0.151053	-0.151812	-0.132856	-0.1772	-0.17672	-0.155179	-0.170994	-0.167568	-0.161246	-0.146639	-0.156112	-0.160425	-0.141036	-0.142147	-0.162788	-0.17633	-0.195244	-0.200233	-0.243921	-0.19198	-0.149895	-0.140417	-0.111661	-0.0913973	-0.0437479	-0.0505996	-0.0511485	-0.0515281	-0.0714505	-0.0255092	0.0885891	0.280985	0.289632	0.25727	0.230789	0.169939	0.118429	0.129079	0.0665734	0.0845477
Cos(Upwind)	SS01262	20xUAS-CsChrimson-mVenus-attP18	10sLED	AirLED	olfactoryArena1	Cam1	20191205T183645	6	-0.157959	-0.12497	-0.1496	-0.195103	-0.187759	-0.155881	-0.126994	-0.141778	-0.144731	-0.0839479	-0.0715157	-0.0457074	-0.0775857	-0.0789883	-0.0563704	-0.0258782	-0.0521973	-0.0619835	-0.0735617	-0.100377	-0.0914636	-0.117447	-0.104976	-0.0615455	-0.0591223	-0.079915	-0.0959951	-0.0843431	-0.0619916	-0.0813494	-0.0230678	0.169851	0.291274	0.359533	0.369816	0.38355	0.348244	0.238757	0.165831	0.160543	0.17283
DeltaAnglefroPreviousFrame	SS01262	20xUAS-CsChrimson-mVenus-attP18	10sLED	AirLED	Arena2	Cam0	20191205T180850	6	109.175	116.072	127.552	125.05	143.337	122.034	128.287	120.372	113.411	119.253	134.361	132.428	135.851	138.277	120.305	124.69	139.611	133.973	130.465	135.686	141.162	124.322	143.942	141.247	123.21	125.107	130.75	123.056	132.977	131.311	134.071	185.023	170.799	164.489	157	137.322	148.047	142.821	152.036	156.352	134.291
DeltaAnglefroPreviousFrame	SS01262	20xUAS-CsChrimson-mVenus-attP18	10sLED	AirLED	Arena2	Cam0	20191210T170124	6	108.661	115.269	108.204	110.341	113.9	119.355	123.464	108.892	117.168	119.521	112.306	123.005	115.537	111.575	111.213	115.154	111.556	112.019	101.388	115.127	111.996	116.899	113.454	102.772	106.859	110.26	118.522	117.213	110.371	111.698	126.133	189.165	166.647	139.857	124.488	118.675	120.326	120.56	123.904	120.872	131.922
DeltaAnglefroPreviousFrame	SS01262	20xUAS-CsChrimson-mVenus-attP18	10sLED	AirLED	Arena2	Cam0	20200225T130014	6	115.707	140.111	147.098	140.641	154.309	140.381	140.477	163.01	151.382	139.935	177.211	163.207	138.712	131.362	144.493	138.697	143.264	153.984	143.12	162.069	159.949	159.754	149.364	142.781	137.305	147.93	141.064	150.027	148.228	155.527	152.435	217.947	197.375	156.97	145.663	138.137	149.013	156.191	141.442	159.709	148.233
DeltaAnglefroPreviousFrame	SS01262	20xUAS-CsChrimson-mVenus-attP18	10sLED	AirLED	Arena2	Cam1	20191205T180850	6	75.539	107.608	102.793	94.0467	107.017	99.0138	101.96	108.691	94.3646	97.4125	89.4925	110.432	123.174	131.325	130.123	103.084	91.0609	95.9529	92.8636	89.241	96.4136	96.5999	105.801	100.739	95.7632	99.1696	101.629	96.217	101.323	94.4069	174.152	208.702	172.399	170.892	149.952	156.174	144.077	143.878	142.547	143.726	141.75
DeltaAnglefroPreviousFrame	SS01262	20xUAS-CsChrimson-mVenus-attP18	10sLED	AirLED	Arena2	Cam1	20191210T170124	6	104.273	127.773	129.705	127.178	115.354	118.637	124.34	116.904	120.302	116.487	111.91	117.628	111.714	110.126	117.825	128.386	118.078	126.329	129.199	123.344	129.514	116.394	108.812	111.997	123.763	150.141	116.588	125.367	116.972	118.261	185.535	180.112	151.129	157.822	150.544	134.929	127.923	112.011	113.265	104.693	116.757
DeltaAnglefroPreviousFrame	SS01262	20xUAS-CsChrimson-mVenus-attP18	10sLED	AirLED	Arena2	Cam1	20200225T130014	6	116.956	137.715	136.966	125.351	112.331	124.832	132.534	121.718	138.437	143.445	123.107	127.775	116.199	126.274	126.018	130.518	122.643	138.898	137.479	126.402	122.719	119.37	130.174	134.763	129.848	133.439	146.004	131.568	135.192	137.267	197.041	188.536	166.065	158.32	146.214	129.705	138.817	135.998	137.694	140.241	151.008
DeltaAnglefroPreviousFrame	SS01262	20xUAS-CsChrimson-mVenus-attP18	10sLED	AirLED	olfactoryArena1	Cam0	20191205T181232	6	110.401	122.177	115.815	130.585	116.372	111.258	118.04	111.858	113.382	112.7	113.133	109.705	120.795	108.659	106.21	112.965	109.455	125.996	98.9142	104.576	104.931	100.334	112.342	102.011	105.407	101.911	107.704	104.153	106.852	98.5125	119.788	168.23	180.943	174.122	151.326	157.947	137.877	138.399	138.808	138.035	136.352
DeltaAnglefroPreviousFrame	SS01262	20xUAS-CsChrimson-mVenus-attP18	10sLED	AirLED	olfactoryArena1	Cam0	20191205T183645	6	100.894	111.915	121.36	121.905	112.903	104.06	119.57	111.565	108.973	115.096	128.206	135.078	128.618	130.697	111.295	111.573	118.662	110.988	102.974	127.432	110.989	111.952	127.416	119.43	115.349	108.687	108.969	115.828	109.902	117.062	108.113	197.922	194.535	153.988	149.839	137.368	143.752	115.131	133.256	110.728	125.644
DeltaAnglefroPreviousFrame	SS01262	20xUAS-CsChrimson-mVenus-attP18	10sLED	AirLED	olfactoryArena1	Cam1	20191205T181232	6	113.248	127.894	126.798	119.432	131.843	119.569	125.502	122.799	124.005	124.555	129.449	130.446	119.314	115.022	120.593	111.925	125.723	122.847	123.22	109.776	124.593	118.096	99.6573	104.312	117.204	119.771	110.399	114.921	117.076	111.887	183.541	198.485	176.449	152.156	144.02	154.188	147.207	139.041	146.544	152.771	170.51
DeltaAnglefroPreviousFrame	SS01262	20xUAS-CsChrimson-mVenus-attP18	10sLED	AirLED	olfactoryArena1	Cam1	20191205T183645	6	88.9649	89.2329	108.323	103.569	106.122	98.2285	102.778	100.408	101.324	107.436	108.368	99.4878	114.776	111.606	100.319	107.712	110.068	104.768	104.254	111.251	104.426	104.966	109.711	109.86	107.061	104.162	112.733	110.511	100.779	120.592	193.499	163.217	167.305	154.056	143.694	135.266	149.33	137.832	135.03	135.004	129.688
WalkingDistanceFromPreviousFrame	SS01262	20xUAS-CsChrimson-mVenus-attP18	10sLED	AirLED	Arena2	Cam0	20191205T180850	6	2.03156	2.32218	2.26602	2.48346	2.34732	2.34012	2.39857	2.3022	2.39193	2.17243	2.32306	2.30346	2.45998	2.47052	2.47544	2.17422	2.04568	2.19463	2.20421	2.11613	2.15841	2.03679	2.19089	2.04526	2.16568	2.15994	2.05712	2.01939	2.03926	2.14148	2.12671	2.19718	1.88483	2.64102	2.69217	2.69808	2.59135	2.46202	2.40413	2.53359	2.57148
WalkingDistanceFromPreviousFrame	SS01262	20xUAS-CsChrimson-mVenus-attP18	10sLED	AirLED	Arena2	Cam0	20191210T170124	6	2.24877	2.32992	2.33285	2.24879	2.16646	2.34615	2.21203	1.99329	2.14984	2.06037	2.02022	2.13422	2.06252	1.99904	2.02311	2.0309	2.24701	2.35223	2.45124	2.36247	2.49028	2.35058	2.41935	2.33252	2.25802	2.13235	2.25859	2.22988	2.24055	2.30041	2.42545	2.74909	2.65006	3.4588	3.84198	3.77604	3.49697	3.06083	3.03711	3.13448	2.84176
WalkingDistanceFromPreviousFrame	SS01262	20xUAS-CsChrimson-mVenus-attP18	10sLED	AirLED	Arena2	Cam0	20200225T130014	6	2.91217	2.7517	3.14502	3.47865	3.55033	3.48466	3.16075	3.2599	3.25722	3.18804	3.10509	2.95693	3.17684	2.9478	3.04986	3.0899	3.25977	2.98619	3.14984	3.20928	3.37524	3.19431	3.25485	3.10069	3.1856	3.21812	3.14228	3.19538	3.23234	3.21575	3.35133	3.4772	3.25418	3.79513	3.27647	3.0178	3.11238	3.09882	3.01998	3.22863	3.16998
WalkingDistanceFromPreviousFrame	SS01262	20xUAS-CsChrimson-mVenus-attP18	10sLED	AirLED	Arena2	Cam1	20191205T180850	6	1.75548	2.09676	2.12999	2.16094	1.91321	1.81999	1.96481	1.87585	1.80878	1.91864	1.89984	1.96961	2.14472	1.96022	2.22708	2.20486	1.90883	1.95505	2.01029	2.08695	1.98965	1.95515	1.88498	1.83033	1.8253	1.88882	1.87828	1.80306	1.75158	1.83846	2.04647	2.08306	2.65581	2.86302	2.87223	2.9718	3.07721	3.20806	2.86413	2.86241	2.85208
WalkingDistanceFromPreviousFrame	SS01262	20xUAS-CsChrimson-mVenus-attP18	10sLED	AirLED	Arena2	Cam1	20191210T170124	6	2.09444	2.46687	2.1163	2.2685	2.27232	2.36216	2.19671	2.15377	2.15566	2.33152	2.30374	2.29562	2.21187	2.06725	2.01772	2.07789	1.95855	1.96761	1.99674	2.13605	2.05265	1.94226	2.06657	2.08532	2.05268	2.06486	1.92987	2.06433	1.84984	1.79605	2.33485	1.81389	2.29058	2.85012	2.96381	2.73857	2.54363	2.54877	2.90637	2.60281	2.54015
WalkingDistanceFromPreviousFrame	SS01262	20xUAS-CsChrimson-mVenus-attP18	10sLED	AirLED	Arena2	Cam1	20200225T130014	6	2.2348	2.71845	2.47939	2.72697	2.63457	2.78194	2.75821	2.56872	2.6808	2.68712	2.49438	2.37421	2.47916	2.42831	2.30122	2.4401	2.70413	2.76032	2.70476	2.73724	2.73552	2.7075	2.75394	2.58141	2.74568	2.74235	2.81143	2.7051	2.61875	2.52734	2.76382	2.48219	2.95383	3.43564	3.45024	3.14411	2.90301	3.0823	2.90287	2.90032	2.79876
WalkingDistanceFromPreviousFrame	SS01262	20xUAS-CsChrimson-mVenus-attP18	10sLED	AirLED	olfactoryArena1	Cam0	20191205T181232	6	1.87747	1.98949	2.1321	2.32032	2.25004	2.26469	1.98175	2.02984	1.94368	1.89184	1.90947	2.052	2.0664	2.02439	1.86826	2.05359	1.99156	2.10704	1.93419	1.71379	1.8959	1.89995	2.01171	1.8726	2.17339	2.01115	1.91581	1.95146	1.90965	1.97716	2.08309	2.38378	1.90603	2.72858	3.09931	3.10928	2.65921	2.83857	2.6196	2.58125	2.67272
WalkingDistanceFromPreviousFrame	SS01262	20xUAS-CsChrimson-mVenus-attP18	10sLED	AirLED	olfactoryArena1	Cam0	20191205T183645	6	1.53848	1.74736	1.90096	1.86355	1.95752	1.9765	1.90006	1.70732	1.7469	1.86274	1.85063	1.86599	1.70901	1.76099	1.84191	1.82257	1.80221	1.56593	1.53477	1.74708	1.72192	1.77842	1.78274	1.59383	1.66097	1.5805	1.50228	1.50832	1.57724	1.6285	1.61312	1.97094	1.8397	2.45557	2.71811	2.48026	2.59668	2.39902	2.58109	2.36512	2.44033
WalkingDistanceFromPreviousFrame	SS01262	20xUAS-CsChrimson-mVenus-attP18	10sLED	AirLED	olfactoryArena1	Cam1	20191205T181232	6	1.51342	1.87959	1.87627	1.73331	1.74369	1.73161	1.69417	1.83352	1.96103	1.92414	1.85796	1.92874	1.81479	1.86178	1.86789	1.88612	1.81116	1.77956	1.73564	1.58586	1.74413	1.76332	1.62055	1.7364	1.84352	1.91647	1.66076	1.65418	1.69925	1.56903	1.99375	2.00398	2.39734	2.44302	2.45181	2.37231	2.17177	2.26028	2.22504	2.02989	2.2012
WalkingDistanceFromPreviousFrame	SS01262	20xUAS-CsChrimson-mVenus-attP18	10sLED	AirLED	olfactoryArena1	Cam1	20191205T183645	6	1.32673	1.62394	1.77969	1.85702	1.86367	1.60143	1.68178	1.69991	1.74608	1.78508	1.81599	1.67027	1.8232	1.81094	1.63082	1.7128	1.91344	1.93415	1.87018	1.87945	1.84219	1.69425	1.85415	1.80737	1.91722	1.90609	1.94205	1.95596	1.67165	1.64783	2.2793	2.09821	2.74132	2.88607	2.96756	2.59814	2.60393	2.53886	2.52052	2.48663	2.71809
revisit-10mmOut3mmIn-15s	SS01262	20xUAS-CsChrimson-mVenus-attP18	10sLED	AirLED	Arena2	Cam0	20191205T180850	6	0.223223	0.228404	0.244593	0.264174	0.285542	0.2934	0.243155	0.240575	0.238309	0.242551	0.255224	0.259695	0.266233	0.268317	0.28082	0.284492	0.315033	0.294228	0.290305	0.310185	0.298705	0.267218	0.25582	0.227646	0.246807	0.278125	0.279822	0.269461	0.251941	0.257631	0.2491	0.232545	0.240693	0.260273	0.267889	0.312568	0.336009	0.34823	0.319699	0.306178	0.320391
revisit-10mmOut3mmIn-15s	SS01262	20xUAS-CsChrimson-mVenus-attP18	10sLED	AirLED	Arena2	Cam0	20191210T170124	6	0.217685	0.239216	0.216667	0.203423	0.220588	0.201961	0.208824	0.203922	0.188235	0.177451	0.202941	0.208824	0.19902	0.217647	0.231373	0.23845	0.216667	0.19902	0.17451	0.165686	0.183507	0.203922	0.207843	0.2	0.241176	0.248167	0.272549	0.265686	0.236275	0.251038	0.226471	0.235938	0.225705	0.251961	0.229638	0.217647	0.257843	0.265686	0.279476	0.292499	0.281373
revisit-10mmOut3mmIn-15s	SS01262	20xUAS-CsChrimson-mVenus-attP18	10sLED	AirLED	Arena2	Cam0	20200225T130014	6	0.170069	0.158333	0.123049	0.107292	0.142708	0.209375	0.197917	0.154167	0.170833	0.208333	0.1625	0.19375	0.183333	0.219792	0.25	0.264583	0.274456	0.253125	0.251042	0.270833	0.256447	0.269792	0.282292	0.257292	0.261262	0.278125	0.257606	0.220833	0.210417	0.230326	0.24375	0.257292	0.254167	0.262421	0.236458	0.225	0.220833	0.23125	0.234768	0.275491	0.241667
revisit-10mmOut3mmIn-15s	SS01262	20xUAS-CsChrimson-mVenus-attP18	10sLED	AirLED	Arena2	Cam1	20191205T180850	6	0.135219	0.132829	0.108458	0.127421	0.137656	0.122079	0.119787	0.109737	0.0956043	0.10468	0.114437	0.110326	0.12046	0.128384	0.144874	0.145397	0.154056	0.16254	0.17104	0.172314	0.169774	0.168147	0.173719	0.163121	0.157523	0.164912	0.174294	0.183775	0.178897	0.153865	0.162982	0.145811	0.14356	0.17786	0.198945	0.238501	0.218745	0.196605	0.219156	0.176954	0.174279
revisit-10mmOut3mmIn-15s	SS01262	20xUAS-CsChrimson-mVenus-attP18	10sLED	AirLED	Arena2	Cam1	20191210T170124	6	0.157811	0.15332	0.145547	0.138682	0.148326	0.130587	0.0956964	0.0859047	0.120286	0.158419	0.17295	0.187498	0.211378	0.19983	0.211941	0.183508	0.172119	0.196736	0.198395	0.203186	0.200885	0.181307	0.124865	0.166115	0.195409	0.189901	0.178143	0.162777	0.184134	0.205625	0.193915	0.200019	0.228687	0.248394	0.245718	0.268349	0.266107	0.243126	0.242172	0.234176	0.246652
revisit-10mmOut3mmIn-15s	SS01262	20xUAS-CsChrimson-mVenus-attP18	10sLED	AirLED	Arena2	Cam1	20200225T130014	6	0.183209	0.204379	0.201272	0.208549	0.20899	0.206384	0.172229	0.169668	0.181669	0.218631	0.227709	0.228014	0.259634	0.246892	0.199168	0.191926	0.207544	0.203063	0.193404	0.197955	0.214024	0.247516	0.263334	0.268924	0.225371	0.186118	0.184715	0.20728	0.19647	0.176641	0.230691	0.267383	0.246389	0.244684	0.265508	0.221158	0.221635	0.217836	0.191543	0.19683	0.179681
revisit-10mmOut3mmIn-15s	SS01262	20xUAS-CsChrimson-mVenus-attP18	10sLED	AirLED	olfactoryArena1	Cam0	20191205T181232	6	0.163823	0.160893	0.171354	0.206874	0.187337	0.172956	0.164444	0.183631	0.166265	0.164453	0.165919	0.151936	0.153781	0.144298	0.17578	0.186428	0.180847	0.209555	0.237232	0.244493	0.245808	0.267371	0.283302	0.267447	0.24339	0.248483	0.271199	0.254258	0.198921	0.193564	0.196919	0.183797	0.184701	0.218217	0.250092	0.254075	0.268253	0.287734	0.302942	0.295024	0.325104
revisit-10mmOut3mmIn-15s	SS01262	20xUAS-CsChrimson-mVenus-attP18	10sLED	AirLED	olfactoryArena1	Cam0	20191205T183645	6	0.189167	0.175818	0.169261	0.164739	0.173287	0.170159	0.179657	0.212002	0.209346	0.22324	0.212868	0.192708	0.187132	0.197746	0.188851	0.218127	0.232165	0.229065	0.23817	0.244244	0.243654	0.239232	0.242221	0.242181	0.217888	0.188535	0.155065	0.169528	0.165393	0.140451	0.156452	0.183193	0.184496	0.212728	0.215461	0.242425	0.2455	0.212308	0.185735	0.174963	0.198728
revisit-10mmOut3mmIn-15s	SS01262	20xUAS-CsChrimson-mVenus-attP18	10sLED	AirLED	olfactoryArena1	Cam1	20191205T181232	6	0.158227	0.160355	0.189683	0.189683	0.17381	0.181746	0.199206	0.196032	0.203175	0.216667	0.227778	0.245238	0.237302	0.230952	0.224603	0.215873	0.204762	0.206349	0.178814	0.179365	0.180159	0.200232	0.197201	0.173016	0.180952	0.169048	0.168254	0.17381	0.124007	0.138095	0.157143	0.15	0.164564	0.194444	0.210617	0.219184	0.228811	0.216226	0.217532	0.196032	0.25
revisit-10mmOut3mmIn-15s	SS01262	20xUAS-CsChrimson-mVenus-attP18	10sLED	AirLED	olfactoryArena1	Cam1	20191205T183645	6	0.169616	0.179979	0.176087	0.157246	0.141304	0.137681	0.144301	0.148551	0.144928	0.15	0.180435	0.176812	0.19432	0.184783	0.176087	0.206066	0.192029	0.175362	0.164493	0.171739	0.176812	0.193627	0.197101	0.176812	0.196595	0.186232	0.171739	0.158696	0.163043	0.148551	0.153419	0.167391	0.176907	0.178261	0.168885	0.218116	0.228986	0.228324	0.25238	0.268116	0.241304
DeltaDistanceFromCenter	SS49899	20xUAS-CsChrimson-mVenus-attP18	10sLED	AirLED	Arena2	Cam0	20191206T153523	6	0.0275431	0.0279776	0.0257781	0.019825	0.0196185	0.0173538	0.0171935	0.0203781	0.0209879	0.0242372	0.0284239	0.0311016	0.027447	0.0278024	0.027706	0.0255639	0.0224978	0.0118827	0.00523109	-0.00147096	-0.00223705	-0.0016765	-0.00104014	0.00291415	0.00786342	0.0123499	0.0150843	0.014814	0.00929262	0	0.000325599	0.00566904	0.0150073	0.0254145	0.0393658	0.066741	0.0949294	0.114864	0.132974	0.144636	0.151417
DeltaDistanceFromCenter	SS49899	20xUAS-CsChrimson-mVenus-attP18	10sLED	AirLED	Arena2	Cam0	20191210T113745	6	0.0338172	0.0370612	0.0393832	0.0380848	0.0321733	0.0271922	0.0214898	0.0151485	0.0107837	0.00762535	0.0042171	0.00361137	0.00433442	0.00490302	0.00366679	0.000112132	-0.00415031	-0.00833862	-0.00833733	-0.00180624	0.00384238	0.00605143	0.00921951	0.0090863	0.000883834	-0.0092608	-0.00828375	-0.001013	0.00180702	0	-0.00220439	-0.00489486	-0.000104666	0.0141502	0.0310164	0.0498311	0.0653865	0.0806561	0.0946225	0.107892	0.110772
DeltaDistanceFromCenter	SS49899	20xUAS-CsChrimson-mVenus-attP18	10sLED	AirLED	Arena2	Cam1	20191206T153523	6	-0.0149865	-0.0120269	-0.00904773	-0.00884962	-0.00675563	0.000994583	0.00422632	0.00635681	0.00683445	0.00705006	0.0181352	0.0240195	0.0263684	0.0205258	0.00638024	-0.00493846	-0.0076594	-0.00197488	-0.0154586	-0.0152181	-0.0262143	-0.0257506	-0.0247036	-0.0169916	-0.0199759	-0.0194041	-0.0119125	-0.0130024	-0.000400256	0	0.00110743	0.0170665	0.0170297	0.0317299	0.0562378	0.0770506	0.0915042	0.103535	0.122556	0.124678	0.115866
DeltaDistanceFromCenter	SS49899	20xUAS-CsChrimson-mVenus-attP18	10sLED	AirLED	Arena2	Cam1	20191210T113745	6	-0.00501768	0.0038227	0.00690596	0.00835419	0.0215177	0.0256917	0.0247692	0.033614	0.0323803	0.0194427	0.00569187	-0.00258398	-0.00488292	-0.0083658	-0.00298227	0.00233674	0.00208382	0.0105563	0.0200911	0.0151648	0.0136316	0.0152603	0.0109989	0.0124744	0.0282072	0.0329856	0.0227061	0.00898387	0.00130459	0	0.011482	0.0258285	0.0399537	0.0544389	0.0677685	0.0792569	0.082635	0.0918539	0.107112	0.126703	0.138696
DeltaDistanceFromCenter	SS49899	20xUAS-CsChrimson-mVenus-attP18	10sLED	AirLED	olfactoryArena1	Cam0	20191206T153729	6	0.0672166	0.0725873	0.0526811	0.0402962	0.0372964	0.0367166	0.0375988	0.0443128	0.041958	0.0438193	0.0369478	0.0387292	0.0333487	0.033611	0.035773	0.0374913	0.0291013	0.0302453	0.0244043	0.0296426	0.0237892	0.0223696	0.0231984	0.0239256	0.0236534	0.0201545	0.0141035	0.00354574	-0.000282577	0	-0.000469843	0.0017836	0.0124245	0.0141288	0.0320531	0.0582881	0.082247	0.100432	0.111074	0.116502	0.126286
DeltaDistanceFromCenter	SS49899	20xUAS-CsChrimson-mVenus-attP18	10sLED	AirLED	olfactoryArena1	Cam0	20191207T072053	6	0.0173513	0.0218614	0.0280956	0.037402	0.0407303	0.0403974	0.0400345	0.0350683	0.0284975	0.0236875	0.020197	0.0278912	0.0317031	0.0268505	0.0198729	0.0107162	0.000674281	-0.000987057	0.000685353	0.00510172	-0.00101952	-0.00790611	-0.0161782	-0.0189556	-0.0233122	-0.0202909	-0.00871538	-0.00465207	0.000136248	0	-0.00159295	0.00450402	0.0146155	0.0158063	0.030322	0.0410441	0.0535976	0.0612801	0.076587	0.0923458	0.104155
DeltaDistanceFromCenter	SS49899	20xUAS-CsChrimson-mVenus-attP18	10sLED	AirLED	olfactoryArena1	Cam0	20191210T114001	6	0.0531456	0.0518835	0.0432669	0.0400788	0.0313323	0.0294928	0.0285519	0.0282303	0.0256103	0.0322156	0.0397129	0.052286	0.0470216	0.0402679	0.0299305	0.0271494	0.0315308	0.0294925	0.031314	0.0257434	0.0330856	0.0308613	0.0281826	0.0265589	0.0205299	0.0104301	0.00640909	0.00278786	0.00235107	0	0.00164806	0.00913539	0.0221844	0.0341522	0.0484144	0.0704277	0.0944089	0.109032	0.123109	0.133996	0.146579
DeltaDistanceFromCenter	SS49899	20xUAS-CsChrimson-mVenus-attP18	10sLED	AirLED	olfactoryArena1	Cam1	20191206T153729	6	-0.0167824	-0.00989149	-0.00991922	-0.0152456	-0.0199536	-0.0195326	-0.0168839	-0.0129812	-0.0165316	-0.0209597	-0.0206221	-0.0196765	-0.0129724	-0.00822341	-0.00566907	-0.00801178	-0.00589479	-0.00139086	-0.00319593	-0.00214325	0.000836667	-0.00073986	0.000658541	-0.00225295	-0.00061175	0.00237973	0.00463319	0.0025274	0.00231862	0	0.0023845	0.0149862	0.0215578	0.0354932	0.0491278	0.0554491	0.0568098	0.0600661	0.0675605	0.0710285	0.0730546
DeltaDistanceFromCenter	SS49899	20xUAS-CsChrimson-mVenus-attP18	10sLED	AirLED	olfactoryArena1	Cam1	20191207T072053	6	-0.0173758	-0.00798427	-0.00408325	0.000314336	-0.000835107	-0.0138571	-0.0248069	-0.0313518	-0.0366443	-0.0379697	-0.0325987	-0.0269614	-0.0216721	-0.0168608	-0.0104004	0.000225962	0.0142595	0.00955685	0.00381997	-0.00750273	-0.0103927	-0.010399	-0.0137024	-0.0147638	-0.0149889	-0.0130079	-0.00980714	-0.00624713	-0.00226381	0	0.00439283	0.013202	0.0197793	0.0306603	0.0455979	0.060115	0.068985	0.0770781	0.0862688	0.0941728	0.0999641
DeltaDistanceFromCenter	SS49899	20xUAS-CsChrimson-mVenus-attP18	10sLED	AirLED	olfactoryArena1	Cam1	20191210T114001	6	0.023544	0.0294609	0.0361761	0.041956	0.0494266	0.0529356	0.0507414	0.0474391	0.0459251	0.03912	0.0336085	0.0329509	0.0325266	0.032481	0.0343344	0.0392657	0.0394645	0.0394353	0.0422382	0.0440058	0.0422849	0.0394492	0.0314853	0.0232427	0.0165761	0.00716665	0.00138876	0.0014058	0.000673021	0	0.00470289	0.0129467	0.0195753	0.0306776	0.0458448	0.0607029	0.0655492	0.0735469	0.0815404	0.0948555	0.106753
Cos(Upwind)	SS49899	20xUAS-CsChrimson-mVenus-attP18	10sLED	AirLED	Arena2	Cam0	20191206T153523	6	-0.243938	-0.236457	-0.215431	-0.194997	-0.204636	-0.192222	-0.203546	-0.148275	-0.149207	-0.153228	-0.203945	-0.23576	-0.243077	-0.202496	-0.203198	-0.224225	-0.265371	-0.289063	-0.258121	-0.268525	-0.247679	-0.245712	-0.236511	-0.211735	-0.20718	-0.166837	-0.161169	-0.175462	-0.215375	-0.217394	-0.12823	-0.00986363	0.225745	0.215928	0.262485	0.334447	0.319789	0.336739	0.313732	0.250006	0.207311
Cos(Upwind)	SS49899	20xUAS-CsChrimson-mVenus-attP18	10sLED	AirLED	Arena2	Cam0	20191210T113745	6	-0.0624901	0.0205883	0.0465481	0.0393528	-0.00564038	-0.0116685	-0.0284607	-0.0457066	-0.0317243	-0.0236581	-0.0283367	-0.00616881	0.00994494	-0.0389741	-0.0624589	-0.0544031	-0.0852117	-0.121075	-0.0803926	-0.0623966	-0.0559981	-0.0688311	-0.054813	-0.059857	-0.108862	-0.106505	-0.0373598	-0.0153841	-0.0529131	-0.0609945	-0.0871734	-0.00251903	0.129622	0.254904	0.324436	0.287321	0.268975	0.228078	0.193918	0.184683	0.106521
Cos(Upwind)	SS49899	20xUAS-CsChrimson-mVenus-attP18	10sLED	AirLED	Arena2	Cam1	20191206T153523	6	-0.130877	-0.195021	-0.169353	-0.160746	-0.144383	-0.168854	-0.146831	-0.141562	-0.169708	-0.214705	-0.164331	-0.10031	-0.147533	-0.176983	-0.221383	-0.192701	-0.193472	-0.222164	-0.206638	-0.179703	-0.208957	-0.199385	-0.171725	-0.141532	-0.136617	-0.104781	-0.120189	-0.162232	-0.132092	-0.116562	0.0149137	0.239454	0.157839	0.212433	0.286785	0.238793	0.208762	0.223658	0.20673	0.107914	0.0805162
Cos(Upwind)	SS49899	20xUAS-CsChrimson-mVenus-attP18	10sLED	AirLED	Arena2	Cam1	20191210T113745	6	-0.0253298	-0.0228392	0.0135454	-0.0660199	-0.052555	-0.095674	-0.0852135	-0.0634937	-0.0678191	-0.113939	-0.0806321	-0.0936825	-0.0748188	-0.0761806	-0.0539787	-0.109282	-0.0882576	-0.0528163	-0.0493335	-0.122653	-0.115146	-0.0767462	-0.0865241	-0.0482814	-0.0648189	-0.111428	-0.111074	-0.16723	-0.179852	-0.122	-0.06188	0.212837	0.14767	0.13654	0.193982	0.186076	0.131574	0.153217	0.180514	0.223272	0.147086
Cos(Upwind)	SS49899	20xUAS-CsChrimson-mVenus-attP18	10sLED	AirLED	olfactoryArena1	Cam0	20191206T153729	6	-0.17791	-0.239419	-0.231865	-0.207331	-0.196813	-0.176032	-0.140796	-0.143344	-0.166724	-0.211059	-0.226044	-0.250544	-0.28656	-0.273489	-0.210741	-0.259859	-0.297485	-0.323439	-0.304257	-0.260158	-0.251324	-0.200909	-0.185761	-0.185899	-0.159067	-0.19913	-0.239356	-0.259154	-0.217201	-0.226884	-0.144359	-0.00902401	0.18287	0.13864	0.291697	0.406878	0.259297	0.179415	0.122596	0.127339	0.181626
Cos(Upwind)	SS49899	20xUAS-CsChrimson-mVenus-attP18	10sLED	AirLED	olfactoryArena1	Cam0	20191207T072053	6	-0.0251868	-0.0927452	-0.0423194	-0.0992867	-0.163319	-0.179813	-0.155053	-0.139543	-0.0805491	-0.127016	-0.156599	-0.177477	-0.187994	-0.232349	-0.250901	-0.261239	-0.236128	-0.19408	-0.153993	-0.136157	-0.210261	-0.260508	-0.316441	-0.328613	-0.316311	-0.242954	-0.189196	-0.14431	-0.124496	-0.120761	-0.134836	-0.0886021	0.0713598	0.182042	0.220506	0.208976	0.155792	0.160297	0.253497	0.20106	0.204011
Cos(Upwind)	SS49899	20xUAS-CsChrimson-mVenus-attP18	10sLED	AirLED	olfactoryArena1	Cam0	20191210T114001	6	-0.12744	-0.239993	-0.278693	-0.258665	-0.247139	-0.199878	-0.184547	-0.139294	-0.121451	-0.0787933	-0.0403565	-0.0709385	-0.15235	-0.207497	-0.209111	-0.175398	-0.135178	-0.204311	-0.164533	-0.163102	-0.18882	-0.199361	-0.15461	-0.176722	-0.193891	-0.196369	-0.167324	-0.204525	-0.157355	-0.129184	-0.152175	-0.0257027	0.237533	0.232512	0.222597	0.221184	0.196557	0.16374	0.167664	0.134366	0.170304
Cos(Upwind)	SS49899	20xUAS-CsChrimson-mVenus-attP18	10sLED	AirLED	olfactoryArena1	Cam1	20191206T153729	6	-0.201669	-0.152569	-0.222247	-0.238261	-0.217921	-0.15674	-0.120959	-0.155198	-0.132204	-0.160217	-0.096323	-0.098149	-0.101877	-0.0588118	-0.0538103	-0.139853	-0.136725	-0.195633	-0.202249	-0.16677	-0.222622	-0.236302	-0.207533	-0.236769	-0.271987	-0.230899	-0.226173	-0.229397	-0.237969	-0.254307	-0.132924	0.128475	0.1916	0.247594	0.198509	0.116248	0.0804364	0.108154	0.199829	0.0925413	0.0718102
Cos(Upwind)	SS49899	20xUAS-CsChrimson-mVenus-attP18	10sLED	AirLED	olfactoryArena1	Cam1	20191207T072053	6	-0.173901	-0.0727261	-0.085582	-0.0792492	-0.116394	-0.167862	-0.144666	-0.100018	-0.119884	-0.0666553	-0.0680055	-0.0819429	-0.0159196	-0.00698741	0.000459913	0.0357789	0.0372694	-0.0641101	-0.062278	-0.103596	-0.0541532	-0.0773946	-0.103746	-0.0741202	-0.0407794	-0.000864014	-0.0380478	-0.0271362	-0.0129625	-0.0337804	0.0506964	0.236625	0.264602	0.26655	0.345296	0.337119	0.208383	0.213883	0.263717	0.181329	0.122215
Cos(Upwind)	SS49899	20xUAS-CsChrimson-mVenus-attP18	10sLED	AirLED	olfactoryArena1	Cam1	20191210T114001	6	-0.240233	-0.116104	-0.0940765	-0.0832932	-0.043129	-0.065678	-0.0740586	-0.115033	-0.084305	-0.0653378	-0.0916428	-0.122591	-0.116574	-0.118294	-0.12933	-0.109259	-0.135419	-0.0822262	-0.106313	-0.145893	-0.140998	-0.157879	-0.161318	-0.201318	-0.213249	-0.213159	-0.224375	-0.221004	-0.194609	-0.183793	-0.0704448	0.178067	0.184687	0.177287	0.247522	0.231976	0.162258	0.121286	0.0348058	0.065377	0.159292
DeltaAnglefroPreviousFrame	SS49899	20xUAS-CsChrimson-mVenus-attP18	10sLED	AirLED	Arena2	Cam0	20191206T153523	6	76.3805	82.1105	85.4405	81.1045	83.6783	71.9222	78.0971	75.0065	88.5228	88.2351	83.6504	79.6041	79.2013	77.1815	76.163	81.7136	91.4101	97.123	97.8189	84.4885	82.4957	77.1924	88.4425	93.7001	88.7209	92.8831	78.8062	89.8439	86.8658	98.1499	86.6242	228.563	250.352	220.408	187.375	163.941	159.156	153.962	158.581	152.423	168.807
DeltaAnglefroPreviousFrame	SS49899	20xUAS-CsChrimson-mVenus-attP18	10sLED	AirLED	Arena2	Cam0	20191210T113745	6	81.4674	101.249	102.536	96.2594	109.427	99.7842	108.982	101.557	99.889	103.527	92.9348	97.9101	103.213	91.715	84.544	102.361	101.702	104.404	110.825	104.126	96.8678	94.8926	85.5598	97.3583	98.965	98.0527	103.187	95.9533	96.2912	97.2324	107.384	197.403	239.661	207.967	176.127	174.065	172.344	182.157	173.819	176.35	182.988
DeltaAnglefroPreviousFrame	SS49899	20xUAS-CsChrimson-mVenus-attP18	10sLED	AirLED	Arena2	Cam1	20191206T153523	6	95.9174	105.504	95.75	97.788	90.934	108.223	104.315	102.383	102.842	93.4402	100.377	109.137	100.369	105.29	111.178	107.975	109.085	106.992	108.169	116.169	116.517	119.897	113.772	118.966	113.816	114.749	111.554	106.134	100.369	103.074	243.787	257.904	275.887	194.455	191.27	186.759	203.408	210.937	205.223	199.661	204.775
DeltaAnglefroPreviousFrame	SS49899	20xUAS-CsChrimson-mVenus-attP18	10sLED	AirLED	Arena2	Cam1	20191210T113745	6	92.0448	99.0592	107.967	109.933	102.86	103.294	115.329	116.343	96.3788	100.003	97.0538	107.144	96.5128	98.0042	95.5908	94.43	97.519	106.605	93.7539	104.421	87.8759	103.479	107.175	101.999	99.7855	102.451	97.4544	94.9352	89.8518	101.08	215.754	250.517	215.825	185.952	166.767	157.236	176.813	173.178	197.622	190.484	189.607
DeltaAnglefroPreviousFrame	SS49899	20xUAS-CsChrimson-mVenus-attP18	10sLED	AirLED	olfactoryArena1	Cam0	20191206T153729	6	93.7056	118.617	113.337	116.67	104.742	103.495	103.762	100.724	104.921	93.2177	109.786	106.832	87.7676	101.109	102.924	112.127	107.856	115.755	97.8373	93.4866	94.2203	96.0945	101.91	105.022	105.377	118.836	94.0452	92.0138	91.95	100.492	107.855	209.184	246.095	219.476	194.349	167.143	177.445	175.122	178.611	161.991	164.765
DeltaAnglefroPreviousFrame	SS49899	20xUAS-CsChrimson-mVenus-attP18	10sLED	AirLED	olfactoryArena1	Cam0	20191207T072053	6	81.0508	81.0233	83.2475	91.782	67.8589	92.0183	80.1387	78.7567	84.9343	91.712	75.8453	93.4262	83.0435	74.7297	81.6746	96.3554	91.6631	72.26	74.6906	82.8535	77.7285	78.1173	74.0307	76.0241	75.4666	86.1937	88.0902	95.1725	84.5976	94.1003	91.5346	231.152	259.299	214.304	175.014	181.685	177.286	198.059	177.877	168.058	177.917
DeltaAnglefroPreviousFrame	SS49899	20xUAS-CsChrimson-mVenus-attP18	10sLED	AirLED	olfactoryArena1	Cam0	20191210T114001	6	69.6419	96.0148	110.979	97.9413	108.595	98.987	98.2518	112.143	101.348	96.4369	124.599	100.907	120.084	107.756	114.862	111.758	103.693	106.885	105.435	100.562	109.312	98.7182	99.9267	103.052	102.83	103.048	97.807	108.044	110.156	107.478	100.799	230.614	262.619	235.413	198.725	189.451	183.257	178.527	185.701	187.986	192.685
DeltaAnglefroPreviousFrame	SS49899	20xUAS-CsChrimson-mVenus-attP18	10sLED	AirLED	olfactoryArena1	Cam1	20191206T153729	6	95.9722	97.6889	104.277	115.319	109.121	93.2707	102.847	110.525	103.438	117.81	118.15	118.045	117.471	120.119	117.74	91.9236	120.62	105.085	118.9	106.643	121.399	121.798	137.56	124.603	121.697	116.113	112.887	108.661	113.097	112.901	255.245	238.107	244.516	208.015	182.961	203.482	194.528	215.863	195.95	194.49	194.455
DeltaAnglefroPreviousFrame	SS49899	20xUAS-CsChrimson-mVenus-attP18	10sLED	AirLED	olfactoryArena1	Cam1	20191207T072053	6	85.8145	100.257	106.629	101.461	99.9644	90.7629	98.0851	93.6567	97.6073	94.95	92.0164	99.3206	101.059	98.4951	104.49	95.307	95.0397	89.4199	95.7076	104.614	96.4493	118.183	106.625	115.403	96.1719	92.4289	95.0393	99.5277	97.4938	99.8321	256.088	243.182	210.686	188.962	190.526	175.116	182.956	176.148	192.637	184.101	176.184
DeltaAnglefroPreviousFrame	SS49899	20xUAS-CsChrimson-mVenus-attP18	10sLED	AirLED	olfactoryArena1	Cam1	20191210T114001	6	94.6914	92.4118	90.7681	83.2805	92.0238	107.128	95.6724	94.1092	88.5707	84.215	97.0599	92.2724	94.0236	90.5958	91.3112	91.7846	94.4109	90.0922	98.2696	94.8494	91.5204	102.015	99.1766	90.6008	91.5498	81.834	88.5088	87.819	91.8701	96.9562	241.684	274.704	231.863	189.36	176.896	171.723	175.459	193.831	186.194	163.789	194.447
WalkingDistanceFromPreviousFrame	SS49899	20xUAS-CsChrimson-mVenus-attP18	10sLED	AirLED	Arena2	Cam0	20191206T153523	6	1.38109	1.58024	1.55069	1.61334	1.53899	1.61077	1.53755	1.43844	1.30383	1.36103	1.47102	1.45135	1.39723	1.24957	1.21293	1.27871	1.54846	1.60402	1.56795	1.64433	1.53744	1.57734	1.36372	1.53143	1.70474	1.73629	1.74198	1.61194	1.69182	1.91248	1.91681	1.88114	1.89899	2.08989	2.51706	2.54722	2.24066	2.21006	2.12689	2.2187	2.15578
WalkingDistanceFromPreviousFrame	SS49899	20xUAS-CsChrimson-mVenus-attP18	10sLED	AirLED	Arena2	Cam0	20191210T113745	6	2.11941	2.32961	2.27772	2.26024	2.22056	2.16445	2.20508	2.28148	2.10459	2.07358	2.01634	2.07661	1.97858	2.01751	1.98657	2.01742	1.98424	2.08608	2.32655	2.27923	2.1781	2.23956	2.30315	2.27699	2.20364	2.2643	2.36752	2.36611	2.25954	2.2622	2.07561	2.19868	1.875	2.06099	2.35278	2.35257	2.34469	2.36039	2.38467	2.32522	2.21336
WalkingDistanceFromPreviousFrame	SS49899	20xUAS-CsChrimson-mVenus-attP18	10sLED	AirLED	Arena2	Cam1	20191206T153523	6	1.62898	1.79276	1.70333	1.67588	1.67474	1.76722	1.74981	1.76411	1.72785	1.95656	1.90992	1.8438	1.78728	1.69548	1.91208	1.63039	1.71417	1.76265	1.81281	1.55767	1.72828	1.86996	1.63148	1.65195	1.51533	1.72421	1.82269	2.12965	2.07863	1.69473	1.98978	1.99297	2.27205	2.48897	2.703	2.62825	2.46627	2.3251	2.42885	2.46861	2.55593
WalkingDistanceFromPreviousFrame	SS49899	20xUAS-CsChrimson-mVenus-attP18	10sLED	AirLED	Arena2	Cam1	20191210T113745	6	1.93752	2.2821	2.25085	2.11432	1.94877	1.92536	1.99872	1.94383	1.80777	1.75376	1.9464	1.89156	1.85224	1.9737	1.72274	1.8579	1.94045	1.96999	2.07953	1.96164	1.8537	1.91325	2.05662	2.0548	1.87087	1.82981	1.74115	1.96666	2.01989	1.97942	2.00632	1.76217	1.76342	1.90802	1.90514	1.92256	1.92707	1.74731	1.94262	1.96679	1.91589
WalkingDistanceFromPreviousFrame	SS49899	20xUAS-CsChrimson-mVenus-attP18	10sLED	AirLED	olfactoryArena1	Cam0	20191206T153729	6	1.2979	1.61568	1.76502	1.55031	1.55838	1.46391	1.70138	1.49616	1.53538	1.39417	1.4619	1.57331	1.30473	1.17433	1.27756	1.4404	1.63346	1.54908	1.59661	1.34432	1.28963	1.09791	1.24837	1.34424	1.36882	1.59132	1.50958	1.3802	1.49774	1.2871	1.54709	1.75177	1.66241	1.97441	2.14521	1.89944	2.10961	2.20061	1.99758	1.68057	1.83365
WalkingDistanceFromPreviousFrame	SS49899	20xUAS-CsChrimson-mVenus-attP18	10sLED	AirLED	olfactoryArena1	Cam0	20191207T072053	6	1.45062	1.68413	1.62761	1.7514	1.5339	1.50236	1.45231	1.49935	1.13464	1.26996	1.01984	1.31206	1.39011	1.18686	1.37102	1.36252	1.42817	1.34563	1.42622	1.44257	1.48609	1.29877	1.4379	1.49943	1.59586	1.7129	1.46069	1.32818	1.4429	1.50178	1.38059	2.03277	2.40256	2.44481	2.58715	2.59693	2.53836	2.13519	1.96957	2.09272	1.95876
WalkingDistanceFromPreviousFrame	SS49899	20xUAS-CsChrimson-mVenus-attP18	10sLED	AirLED	olfactoryArena1	Cam0	20191210T114001	6	1.4852	1.68249	1.84126	1.87958	1.89214	1.94799	2.04599	2.05688	2.12366	2.07874	1.99525	1.83607	1.86773	1.98885	2.00758	1.97823	1.97711	2.05877	1.98087	1.79666	1.79118	1.86219	1.81155	1.90201	1.81633	1.78254	1.72195	1.83153	1.99774	1.9735	1.79236	2.12514	1.94848	2.23741	2.37433	2.48175	2.26819	2.17615	2.20843	2.13809	2.15197
WalkingDistanceFromPreviousFrame	SS49899	20xUAS-CsChrimson-mVenus-attP18	10sLED	AirLED	olfactoryArena1	Cam1	20191206T153729	6	1.19208	1.45643	1.48535	1.43173	1.27535	1.31532	1.38395	1.58574	1.36455	1.45983	1.64682	1.53186	1.55435	1.56548	1.4256	1.41903	1.67092	1.54432	1.65618	1.49384	1.45713	1.61467	1.49988	1.59422	1.63243	1.66018	1.44395	1.55456	1.60334	1.60343	2.01301	1.66776	1.82535	2.12035	1.90065	1.91232	2.03747	1.91741	1.77141	2.01194	2.18472
WalkingDistanceFromPreviousFrame	SS49899	20xUAS-CsChrimson-mVenus-attP18	10sLED	AirLED	olfactoryArena1	Cam1	20191207T072053	6	1.55812	1.82511	1.88454	1.75801	1.81011	1.90981	1.97297	1.90749	1.83243	1.98819	1.83524	1.75992	1.7491	1.83455	1.8464	2.08546	1.85667	1.75689	1.65617	1.89312	1.66613	1.62831	1.9221	1.8442	1.77647	1.79289	1.92012	1.92738	1.82475	1.74612	2.12068	1.99565	2.0485	1.99622	1.97708	1.86667	1.87816	1.85893	1.86887	1.89075	1.84005
WalkingDistanceFromPreviousFrame	SS49899	20xUAS-CsChrimson-mVenus-attP18	10sLED	AirLED	olfactoryArena1	Cam1	20191210T114001	6	1.49217	1.58103	1.75626	1.5869	1.45251	1.52587	1.56662	1.57698	1.59269	1.52528	1.38428	1.45866	1.61789	1.58412	1.4846	1.4453	1.52295	1.51773	1.44845	1.50135	1.24473	1.62673	1.58901	1.63091	1.55964	1.5983	1.62942	1.65475	1.49333	1.30751	1.79069	1.65068	1.79863	1.94018	1.91013	1.89286	1.78151	1.93905	1.97876	1.70626	1.77299
revisit-10mmOut3mmIn-15s	SS49899	20xUAS-CsChrimson-mVenus-attP18	10sLED	AirLED	Arena2	Cam0	20191206T153523	6	0.0838618	0.0993167	0.123529	0.117133	0.108263	0.081437	0.109651	0.129315	0.145833	0.158578	0.15428	0.136275	0.128431	0.147059	0.153922	0.153361	0.146789	0.153738	0.148894	0.151961	0.158309	0.152941	0.175053	0.193137	0.189496	0.228658	0.25098	0.243137	0.210428	0.14459	0.154626	0.173825	0.214706	0.242459	0.240935	0.309027	0.326471	0.328733	0.313725	0.336623	0.31706
revisit-10mmOut3mmIn-15s	SS49899	20xUAS-CsChrimson-mVenus-attP18	10sLED	AirLED	Arena2	Cam0	20191210T113745	6	0.11382	0.115186	0.114663	0.120635	0.127098	0.122222	0.0960317	0.0968254	0.0865079	0.0896825	0.107937	0.104762	0.100794	0.0968254	0.124603	0.100794	0.107143	0.126266	0.130159	0.152381	0.165873	0.189683	0.212888	0.227778	0.230952	0.229365	0.224603	0.2383	0.262698	0.272325	0.299206	0.319841	0.317155	0.306349	0.284127	0.319048	0.35	0.341456	0.318413	0.34059	0.335194
revisit-10mmOut3mmIn-15s	SS49899	20xUAS-CsChrimson-mVenus-attP18	10sLED	AirLED	Arena2	Cam1	20191206T153523	6	0.152724	0.163149	0.16619	0.170749	0.172728	0.173287	0.199238	0.216966	0.223374	0.237525	0.222639	0.224823	0.240755	0.259125	0.274672	0.288266	0.242932	0.224021	0.21801	0.227888	0.215164	0.199796	0.235775	0.241664	0.22574	0.215457	0.226348	0.213977	0.246098	0.241464	0.269822	0.293081	0.294474	0.303053	0.375327	0.399053	0.359282	0.34728	0.350443	0.368749	0.422416
revisit-10mmOut3mmIn-15s	SS49899	20xUAS-CsChrimson-mVenus-attP18	10sLED	AirLED	Arena2	Cam1	20191210T113745	6	0.0899203	0.110084	0.112791	0.118327	0.128056	0.100709	0.0886905	0.0749305	0.0740132	0.0690455	0.0728743	0.0577412	0.0567767	0.0666758	0.0815458	0.085388	0.113058	0.108348	0.103347	0.118411	0.151911	0.151084	0.171825	0.19224	0.211109	0.227892	0.231473	0.222312	0.224319	0.271523	0.28388	0.28285	0.29726	0.343508	0.347824	0.324907	0.313304	0.270055	0.254896	0.255779	0.27972
revisit-10mmOut3mmIn-15s	SS49899	20xUAS-CsChrimson-mVenus-attP18	10sLED	AirLED	olfactoryArena1	Cam0	20191206T153729	6	0.189732	0.213883	0.217754	0.196261	0.229504	0.250708	0.210889	0.216006	0.20632	0.173716	0.17968	0.147009	0.144116	0.144979	0.173718	0.169658	0.184994	0.187393	0.169631	0.179579	0.198809	0.240919	0.262607	0.231197	0.233654	0.227991	0.232222	0.285043	0.304701	0.283146	0.253223	0.24589	0.250641	0.273361	0.274038	0.26485	0.334402	0.354808	0.330662	0.299359	0.256944
revisit-10mmOut3mmIn-15s	SS49899	20xUAS-CsChrimson-mVenus-attP18	10sLED	AirLED	olfactoryArena1	Cam0	20191207T072053	6	0.100884	0.111325	0.113675	0.0948718	0.130769	0.175641	0.153846	0.160501	0.15235	0.126057	0.117283	0.121214	0.151282	0.168156	0.162556	0.170513	0.182672	0.170299	0.160043	0.143376	0.165288	0.15821	0.160606	0.138561	0.132051	0.129487	0.13875	0.14188	0.144872	0.134871	0.157523	0.196986	0.222734	0.281026	0.288462	0.264103	0.3	0.298718	0.226923	0.241026	0.248718
revisit-10mmOut3mmIn-15s	SS49899	20xUAS-CsChrimson-mVenus-attP18	10sLED	AirLED	olfactoryArena1	Cam0	20191210T114001	6	0.17513	0.174169	0.188817	0.190278	0.197475	0.196322	0.205416	0.196013	0.213767	0.210778	0.218894	0.208606	0.210101	0.196176	0.186708	0.171501	0.189387	0.166955	0.167371	0.187739	0.188809	0.19739	0.217449	0.233911	0.261934	0.250407	0.239175	0.240921	0.240597	0.227628	0.256957	0.277548	0.293669	0.314792	0.293318	0.32281	0.360782	0.298629	0.309347	0.349134	0.340772
revisit-10mmOut3mmIn-15s	SS49899	20xUAS-CsChrimson-mVenus-attP18	10sLED	AirLED	olfactoryArena1	Cam1	20191206T153729	6	0.148291	0.132051	0.106654	0.120278	0.121795	0.170513	0.182051	0.170513	0.174359	0.155128	0.144872	0.152564	0.141026	0.164103	0.160256	0.123077	0.105128	0.0935897	0.103846	0.141026	0.183522	0.198718	0.192308	0.233661	0.207692	0.187179	0.205128	0.180769	0.173077	0.2	0.188462	0.191026	0.239744	0.258974	0.287179	0.282051	0.302564	0.284615	0.297436	0.271934	0.27743
revisit-10mmOut3mmIn-15s	SS49899	20xUAS-CsChrimson-mVenus-attP18	10sLED	AirLED	olfactoryArena1	Cam1	20191207T072053	6	0.117167	0.142708	0.152083	0.145833	0.145833	0.191667	0.185417	0.158333	0.138542	0.135417	0.151042	0.171875	0.202083	0.182292	0.215625	0.233333	0.210417	0.186458	0.179416	0.198958	0.207292	0.177214	0.16875	0.18125	0.191667	0.184375	0.209375	0.188876	0.228125	0.264583	0.303125	0.282292	0.228125	0.244241	0.21875	0.264583	0.278125	0.294792	0.330208	0.298958	0.301042
revisit-10mmOut3mmIn-15s	SS49899	20xUAS-CsChrimson-mVenus-attP18	10sLED	AirLED	olfactoryArena1	Cam1	20191210T114001	6	0.0934492	0.083597	0.0927083	0.0989583	0.0875	0.103125	0.096875	0.0895833	0.0916667	0.090625	0.109375	0.103125	0.0854167	0.110417	0.107292	0.126356	0.09375	0.0927083	0.101042	0.141667	0.1375	0.144792	0.126225	0.123094	0.158333	0.175	0.125	0.129167	0.119792	0.136616	0.172052	0.197165	0.171875	0.177083	0.173958	0.171875	0.187762	0.216916	0.23125	0.269792	0.2625
DeltaDistanceFromCenter	MB077B	20xUAS-CsChrimson-mVenus-attP18	10sLED	AirLED	Arena2	Cam0	20190803T100126	6	-0.031306	-0.0275585	-0.0203719	-0.0143919	-0.0122879	-0.0106897	-0.012286	-0.0154176	-0.015004	-0.0152784	-0.0135342	-0.00990989	-0.00697791	-0.00691361	-0.00949346	-0.0110504	-0.00953385	-0.0147225	-0.0197442	-0.0184142	-0.0155342	-0.01604	-0.0134609	-0.0118618	-0.0126201	-0.0161392	-0.016501	-0.0111699	-0.00411203	0	0.00530021	0.00989798	0.0186263	0.0293702	0.0419396	0.057857	0.0707031	0.078105	0.0818862	0.0872644	0.0915992
DeltaDistanceFromCenter	MB077B	20xUAS-CsChrimson-mVenus-attP18	10sLED	AirLED	Arena2	Cam0	20200225T132745	6	-0.0362406	-0.0328937	-0.0327092	-0.0299722	-0.018972	-0.00710444	0.00083536	0.00435407	0.00911775	0.0139944	0.021278	0.0229849	0.0226811	0.0262692	0.027964	0.0324458	0.0403134	0.0450405	0.0430089	0.0373237	0.0318554	0.0277969	0.0276406	0.027593	0.0243513	0.0196268	0.0139091	0.00917224	0.00543846	0	-0.00412156	-0.0107622	-0.00974386	0.000516167	0.0108867	0.0217124	0.0320341	0.0385482	0.0408574	0.0422795	0.0397932
DeltaDistanceFromCenter	MB077B	20xUAS-CsChrimson-mVenus-attP18	10sLED	AirLED	Arena2	Cam1	20190707T212237	6	0.070843	0.0667001	0.063276	0.0607273	0.0548186	0.0475003	0.0476761	0.050581	0.0486726	0.0435096	0.0381655	0.031744	0.0366604	0.0461788	0.0510432	0.0536655	0.0565235	0.0572216	0.0549298	0.0487161	0.0390769	0.0283789	0.0214552	0.0161819	0.00957752	0.00498048	0.00565505	0.00157259	-0.00318974	0	0.00135539	0.0213964	0.0531946	0.0832473	0.106162	0.126657	0.14688	0.159758	0.167826	0.171708	0.172871
DeltaDistanceFromCenter	MB077B	20xUAS-CsChrimson-mVenus-attP18	10sLED	AirLED	Arena2	Cam1	20200225T132745	6	-0.00430576	0.00291409	0.00861139	0.00925718	0.00589397	-0.000589988	0.000369354	0.0016813	0.00510732	0.0124522	0.0146642	0.0101805	0.009058	0.0124034	0.0148625	0.0126565	0.013869	0.0114652	0.00593679	0.000481795	-0.00395389	-0.00440167	-0.00117487	0.000969227	0.00295903	0.0081052	0.0102521	0.0103019	0.00511875	0	0.000641565	0.00452585	0.0134353	0.0272534	0.046483	0.0631871	0.0703576	0.0765962	0.0796069	0.0792822	0.081288
DeltaDistanceFromCenter	MB077B	20xUAS-CsChrimson-mVenus-attP18	10sLED	AirLED	olfactoryArena1	Cam0	20190707T212729	6	0.0335734	0.0325613	0.0276027	0.0182524	0.0162494	0.0173921	0.0201034	0.0129622	0.0143294	0.0162815	0.0212075	0.0203133	0.0119173	0.00495984	-0.00536695	-0.0044006	-0.00360214	-0.00787518	-0.005415	-0.0132504	-0.0114299	-0.0143437	-0.0147709	-0.00569859	-0.0075161	-0.0120215	-0.0135158	-0.0150489	-0.0173683	0	0.00724459	0.00786034	0.0197916	0.0405385	0.066873	0.0835534	0.100882	0.111605	0.116047	0.120388	0.133155
DeltaDistanceFromCenter	MB077B	20xUAS-CsChrimson-mVenus-attP18	10sLED	AirLED	olfactoryArena1	Cam0	20200225T133118	6	-0.0358653	-0.0323495	-0.031187	-0.0302807	-0.0293334	-0.0240219	-0.022597	-0.0233772	-0.0205317	-0.0165593	-0.0164332	-0.0148292	-0.00985058	-0.00951991	-0.0127935	-0.0149635	-0.00875548	-0.00131448	0.00294524	0.00209202	0.00109602	0.000290473	0.00445934	0.00725316	0.00523456	0.00183977	-0.000218902	-0.00126093	-0.00223341	0	0.00229674	0.00395998	0.00777278	0.0104566	0.0156157	0.016009	0.017904	0.0207528	0.0225074	0.0242482	0.0253292
DeltaDistanceFromCenter	MB077B	20xUAS-CsChrimson-mVenus-attP18	10sLED	AirLED	olfactoryArena1	Cam1	20190707T212729	6	0.00521536	0.0162937	0.0188702	0.0128139	0.0142564	0.00127595	-0.00541496	-0.00389344	-0.0141507	-0.0102984	-0.015178	-0.0270619	-0.0302671	-0.0312624	-0.0288416	-0.0251493	-0.0155313	-0.0136164	-0.0309329	-0.0434812	-0.0491577	-0.0403095	-0.0382098	-0.027387	-0.023078	-0.0231666	-0.0164039	-0.0174892	-0.0152595	0	0.011802	0.0362005	0.0573784	0.074469	0.0907868	0.114989	0.135075	0.149144	0.158057	0.162543	0.159424
DeltaDistanceFromCenter	MB077B	20xUAS-CsChrimson-mVenus-attP18	10sLED	AirLED	olfactoryArena1	Cam1	20200225T133118	6	-0.0411308	-0.0347827	-0.0309616	-0.0247537	-0.0195891	-0.0166552	-0.0142526	-0.0179713	-0.0202239	-0.0244171	-0.0303588	-0.0366383	-0.0415362	-0.0460913	-0.0465994	-0.0470919	-0.0455294	-0.0426115	-0.0435904	-0.035212	-0.0216673	-0.00885847	-0.00602453	-0.0106637	-0.0121655	-0.00942305	-0.00805963	-0.00389704	-5.4118e-05	0	-0.00143786	0.0116924	0.0272622	0.0493917	0.0618437	0.0659807	0.0638143	0.0635914	0.0712737	0.0697801	0.0685046
DeltaDistanceFromCenter	MB077B	20xUAS-CsChrimson-mVenus-attP18	10sLED	AirLED	Arena2	Cam0	20190707T212237	5	0.0562636	0.0640862	0.0593909	0.0565368	0.0578549	0.0522525	0.0507686	0.0404638	0.0363597	0.0343924	0.0300186	0.0313952	0.0313996	0.0267441	0.0252558	0.0210303	0.0154849	0.0163674	0.0173083	0.0198045	0.0254649	0.0277242	0.0259774	0.0203254	0.015011	0.0121087	0.00610074	-0.00130153	-0.0021509	0	0.00301662	-0.00162882	0.00819049	0.0307752	0.0617728	0.0889385	0.105497	0.120716	0.137516	0.151145	0.156552
DeltaDistanceFromCenter	MB077B	20xUAS-CsChrimson-mVenus-attP18	10sLED	AirLED	Arena2	Cam1	20190803T100126	5	0.0292858	0.0248901	0.0175203	0.00793645	-0.00173108	-0.00603448	-0.0075224	-0.0104162	-0.0149486	-0.0199979	-0.0203455	-0.0175658	-0.018644	-0.0180122	-0.0167432	-0.0168476	-0.0188667	-0.0196429	-0.0141975	-0.0105755	-0.0078488	-0.00254128	0.0021669	0.003557	0.00261845	0.000222655	-0.00160538	0.00240717	0.00482561	0	0.00334057	0.0189949	0.0459012	0.0760571	0.104226	0.129717	0.142434	0.151735	0.163262	0.167732	0.172799
Cos(Upwind)	MB077B	20xUAS-CsChrimson-mVenus-attP18	10sLED	AirLED	Arena2	Cam0	20190803T100126	6	-0.291084	-0.261695	-0.203142	-0.198505	-0.219068	-0.169021	-0.176442	-0.17614	-0.188983	-0.228868	-0.188245	-0.165945	-0.183666	-0.192041	-0.19732	-0.169372	-0.166103	-0.227958	-0.207458	-0.167761	-0.162124	-0.188132	-0.175236	-0.184354	-0.199741	-0.223925	-0.197953	-0.163515	-0.113841	-0.130016	-0.150457	-0.162395	-0.0283965	0.0102469	0.0300993	0.0609361	0.0452535	0.043806	0.0066685	0.0250736	-0.0172545
Cos(Upwind)	MB077B	20xUAS-CsChrimson-mVenus-attP18	10sLED	AirLED	Arena2	Cam0	20200225T132745	6	-0.0554989	-0.0761463	-0.077183	-0.0835292	-0.0630708	-0.0282911	-0.0499273	-0.0892019	-0.119006	-0.11375	-0.135705	-0.151847	-0.158384	-0.158475	-0.172921	-0.109875	-0.108448	-0.13135	-0.165594	-0.177949	-0.199912	-0.139349	-0.123301	-0.132261	-0.15563	-0.176588	-0.203434	-0.153866	-0.149952	-0.176762	-0.203133	-0.150177	-0.0706125	0.00397194	0.0934232	0.118657	0.149428	0.108239	0.045325	0.00348245	-0.00881249
Cos(Upwind)	MB077B	20xUAS-CsChrimson-mVenus-attP18	10sLED	AirLED	Arena2	Cam1	20190707T212237	6	-0.0720075	-0.176666	-0.139868	-0.129613	-0.157836	-0.154659	-0.116391	-0.138332	-0.183424	-0.166128	-0.180573	-0.19142	-0.131996	-0.12948	-0.157014	-0.168218	-0.178564	-0.168193	-0.216661	-0.247249	-0.253971	-0.198926	-0.218009	-0.201256	-0.21278	-0.173271	-0.139396	-0.211778	-0.213441	-0.15833	-0.161989	0.0310167	0.177628	0.223469	0.182085	0.161926	0.135075	0.211457	0.198203	0.191759	0.139852
Cos(Upwind)	MB077B	20xUAS-CsChrimson-mVenus-attP18	10sLED	AirLED	Arena2	Cam1	20200225T132745	6	-0.152076	-0.124588	-0.114139	-0.121439	-0.186594	-0.215475	-0.179473	-0.178852	-0.226917	-0.17301	-0.233379	-0.290789	-0.303497	-0.320172	-0.29497	-0.263611	-0.282044	-0.277429	-0.283542	-0.285207	-0.289435	-0.296531	-0.324018	-0.300804	-0.318228	-0.370831	-0.310803	-0.330585	-0.316908	-0.265436	-0.226087	-0.0943408	-0.0475309	0.066866	0.176157	0.151451	0.0972587	0.0625728	-0.0104769	-0.0401671	-0.057101
Cos(Upwind)	MB077B	20xUAS-CsChrimson-mVenus-attP18	10sLED	AirLED	olfactoryArena1	Cam0	20190707T212729	6	-0.161724	-0.171862	-0.24366	-0.256089	-0.192764	-0.094663	-0.109348	-0.0989679	-0.0665116	-0.0895682	-0.105922	-0.164596	-0.232148	-0.172603	-0.136318	-0.0813844	-0.118615	-0.138675	-0.119192	-0.131066	-0.150041	-0.122403	-0.0578437	-0.0108838	-0.0940281	-0.12388	-0.121327	-0.140541	-0.156603	-0.108105	-0.122415	-0.0905478	0.179579	0.275023	0.23838	0.171037	0.227206	0.137153	0.0877655	0.0713864	0.125659
Cos(Upwind)	MB077B	20xUAS-CsChrimson-mVenus-attP18	10sLED	AirLED	olfactoryArena1	Cam0	20200225T133118	6	-0.133967	-0.136979	-0.155378	-0.148575	-0.175864	-0.173755	-0.198533	-0.213715	-0.144322	-0.159663	-0.188685	-0.139649	-0.17719	-0.155918	-0.162822	-0.120761	-0.124668	-0.14289	-0.133631	-0.1926	-0.142025	-0.130714	-0.105271	-0.125216	-0.151137	-0.146734	-0.126548	-0.118599	-0.148711	-0.11371	-0.115852	-0.0791016	-0.0275433	0.0316446	0.0358765	0.0644358	0.0523374	0.0432326	0.0446637	0.0186115	0.0894298
Cos(Upwind)	MB077B	20xUAS-CsChrimson-mVenus-attP18	10sLED	AirLED	olfactoryArena1	Cam1	20190707T212729	6	-0.244623	-0.188578	-0.205075	-0.271976	-0.26334	-0.257672	-0.240134	-0.225129	-0.211969	-0.240455	-0.288669	-0.282656	-0.276304	-0.242947	-0.196692	-0.190161	-0.229681	-0.25116	-0.262428	-0.18908	-0.102947	-0.111448	-0.129672	-0.100208	-0.13372	-0.183119	-0.177478	-0.12076	-0.0923617	-0.102142	-0.0594732	0.0848621	0.126124	0.122723	0.166803	0.169049	0.106033	0.0874029	0.0278927	0.0378169	0.0177536
Cos(Upwind)	MB077B	20xUAS-CsChrimson-mVenus-attP18	10sLED	AirLED	olfactoryArena1	Cam1	20200225T133118	6	-0.185126	-0.206031	-0.191063	-0.193346	-0.224696	-0.204114	-0.203319	-0.251436	-0.213132	-0.187005	-0.22311	-0.173138	-0.173861	-0.173843	-0.14751	-0.116941	-0.109354	-0.0928455	-0.111676	-0.0916089	-0.0511929	-0.0334583	-0.0644645	-0.0722071	-0.08096	-0.102274	-0.105734	-0.13659	-0.123809	-0.12227	-0.0973224	0.0555878	0.124289	0.133529	0.129329	0.0521144	-0.049727	-0.0454143	0.0563081	0.0535005	0.0468245
Cos(Upwind)	MB077B	20xUAS-CsChrimson-mVenus-attP18	10sLED	AirLED	Arena2	Cam0	20190707T212237	5	-0.164329	-0.115048	-0.149441	-0.146245	-0.142622	-0.178009	-0.183221	-0.143703	-0.15889	-0.16529	-0.249202	-0.233787	-0.19959	-0.216435	-0.22415	-0.234226	-0.244564	-0.209063	-0.183425	-0.148572	-0.143053	-0.145634	-0.154643	-0.189562	-0.161019	-0.152267	-0.172268	-0.165812	-0.142916	-0.120318	-0.151616	-0.116362	0.0852677	0.155871	0.179605	0.231148	0.201107	0.167658	0.134228	0.103281	0.0579578
Cos(Upwind)	MB077B	20xUAS-CsChrimson-mVenus-attP18	10sLED	AirLED	Arena2	Cam1	20190803T100126	5	-0.163943	-0.218759	-0.202626	-0.175832	-0.150934	-0.133116	-0.140133	-0.0980921	-0.0969791	-0.132177	-0.166391	-0.0965733	-0.0986259	-0.0502182	-0.0927749	-0.132003	-0.108576	-0.0783116	-0.105735	-0.124653	-0.140072	-0.154132	-0.129789	-0.186929	-0.141437	-0.134447	-0.147358	-0.149919	-0.172999	-0.2197	-0.179834	0.0124231	0.139144	0.226769	0.206141	0.172785	0.123669	0.101412	0.0957994	0.0448147	0.0360588
DeltaAnglefroPreviousFrame	MB077B	20xUAS-CsChrimson-mVenus-attP18	10sLED	AirLED	Arena2	Cam0	20190803T100126	6	90.419	83.9046	86.9354	85.3744	94.0993	88.3271	83.7037	84.301	94.4705	98.1377	91.5447	79.5287	86.2056	85.5164	86.0321	80.5962	85.3845	94.7035	82.8546	88.8862	98.7711	99.2418	83.8615	88.4149	84.2626	82.4631	88.1176	84.1598	90.4165	90.0904	95.9741	126.14	128.786	108.842	101.43	105.11	97.0136	95.9778	104.217	97.5172	102.801
DeltaAnglefroPreviousFrame	MB077B	20xUAS-CsChrimson-mVenus-attP18	10sLED	AirLED	Arena2	Cam0	20200225T132745	6	89.564	95.8721	100.591	101.523	103.217	102.328	102.256	104.041	102.23	100.47	98.1994	98.6751	102.541	101.63	106.621	98.1814	103.873	86.8592	97.4217	107.398	100.443	100.837	90.8011	99.2594	81.0535	87.9831	100.197	103.826	87.5243	87.8236	94.4428	139.877	115.393	104.361	112.407	91.0062	110.862	98.9487	102.32	94.6039	97.2726
DeltaAnglefroPreviousFrame	MB077B	20xUAS-CsChrimson-mVenus-attP18	10sLED	AirLED	Arena2	Cam1	20190707T212237	6	123.498	128.881	133.206	127.721	133.681	130.43	109.324	117.951	115.271	117.035	110.672	123.811	124.117	121.938	123.549	117.507	121.36	122.925	129.203	117.919	116.944	112.59	116.349	92.6112	97.1897	99.6756	101.685	103.04	107.065	103.903	139.836	143.048	106.067	119.14	113.555	124.33	111.024	123.399	124.646	123.199	114.079
DeltaAnglefroPreviousFrame	MB077B	20xUAS-CsChrimson-mVenus-attP18	10sLED	AirLED	Arena2	Cam1	20200225T132745	6	97.7572	97.229	100.783	94.463	104.386	110.424	107.263	88.6198	96.6455	97.256	103.463	92.511	94.939	101.629	94.7984	97.6906	94.6531	85.9108	88.4289	85.1622	75.6653	93.5378	84.4699	95.6489	97.3359	95.2666	90.8398	81.476	90.3844	88.2761	139.373	124.663	116.259	117.455	112.606	109.495	101.811	104.956	109.935	113.108	132.352
DeltaAnglefroPreviousFrame	MB077B	20xUAS-CsChrimson-mVenus-attP18	10sLED	AirLED	olfactoryArena1	Cam0	20190707T212729	6	131.129	164.941	157.869	163.944	161.909	171.672	179.1	158.797	166.942	160.525	173.043	172.548	147.639	153.924	146.613	154.524	151.282	144.415	160.095	161.321	136.652	143.765	154.99	142.051	138.787	144.776	141.397	132.849	130.485	128.874	148.778	190.71	167.105	181.341	143.978	151.039	158.137	164.593	159.565	156.292	161.972
DeltaAnglefroPreviousFrame	MB077B	20xUAS-CsChrimson-mVenus-attP18	10sLED	AirLED	olfactoryArena1	Cam0	20200225T133118	6	75.1692	94.4906	93.0976	91.1132	85.9546	93.7273	95.6703	98.1775	97.6921	86.2903	92.7771	104.703	97.9496	81.9084	90.8717	82.9009	85.3467	88.7944	98.0552	93.0006	98.2047	91.4536	84.4099	67.9845	74.0881	82.8835	73.3274	83.0033	93.4444	84.5947	91.2514	112.051	107.265	108.751	98.3476	94.4659	109.187	117.394	106.94	116.78	109.682
DeltaAnglefroPreviousFrame	MB077B	20xUAS-CsChrimson-mVenus-attP18	10sLED	AirLED	olfactoryArena1	Cam1	20190707T212729	6	136.111	187.388	186.069	190.707	181.904	161.88	176.58	165.077	166.448	169.319	176.354	133.908	156.103	146.082	132.037	127.099	141.836	131.074	141.793	147.077	142.758	175.973	154.635	152.684	167.775	164.665	168.966	159.478	140.283	151.959	215.359	210.273	177.558	194.026	182.886	151.311	182.703	188.997	199.469	189.25	166.388
DeltaAnglefroPreviousFrame	MB077B	20xUAS-CsChrimson-mVenus-attP18	10sLED	AirLED	olfactoryArena1	Cam1	20200225T133118	6	95.6313	103.803	97.5396	98.5082	91.6497	92.603	110.451	112.628	116.933	107.957	91.5518	96.6194	122.602	108.412	97.6641	93.6649	95.7261	95.7338	101.23	94.613	93.462	109.687	92.3209	108.295	100.62	105.299	115.233	100.866	103.672	89.9234	158.309	136.971	127.466	107.924	107.746	118.416	107.591	102.438	108.503	102.357	95.1738
DeltaAnglefroPreviousFrame	MB077B	20xUAS-CsChrimson-mVenus-attP18	10sLED	AirLED	Arena2	Cam0	20190707T212237	5	130.653	162.354	182.657	183.788	161.087	154.723	178.932	139.466	169.649	158.308	152.751	144.295	138.118	133.018	123.174	132.347	139.442	142.969	148.899	120.552	132.032	150.305	124.022	146.599	135.946	130.889	127.26	141.711	134.17	139.774	149.264	165.512	172.15	147.392	143.94	161.223	134.824	123.083	140.186	145.606	139.305
DeltaAnglefroPreviousFrame	MB077B	20xUAS-CsChrimson-mVenus-attP18	10sLED	AirLED	Arena2	Cam1	20190803T100126	5	116.011	104.286	99.3469	97.3098	95.8639	94.2714	104.466	107.052	99.0546	88.0873	93.4418	101.468	112.445	107.254	108.942	107.342	128.476	109.796	109.801	112.394	93.4198	97.7546	105.962	102.903	92.6614	90.3005	95.223	95.5043	93.0461	92.3448	138.207	128.846	118.202	109.479	113.546	113.913	108.457	106.11	105.464	116.692	112.215
WalkingDistanceFromPreviousFrame	MB077B	20xUAS-CsChrimson-mVenus-attP18	10sLED	AirLED	Arena2	Cam0	20190803T100126	6	1.1778	1.27762	1.39926	1.29036	1.18507	1.25785	1.15967	1.13914	1.19652	1.34278	1.30234	1.13293	1.21333	1.33693	1.37165	1.256	1.24086	1.3095	1.35185	1.3662	1.28189	1.225	1.13088	1.06663	1.28371	1.41161	1.32454	1.23311	1.41798	1.44782	1.32544	1.44515	1.51794	1.8528	1.65257	1.67207	1.61717	1.46578	1.43139	1.62475	1.47297
WalkingDistanceFromPreviousFrame	MB077B	20xUAS-CsChrimson-mVenus-attP18	10sLED	AirLED	Arena2	Cam0	20200225T132745	6	1.37209	1.56998	1.59343	1.58603	1.76599	1.75106	1.68701	1.6419	1.69725	1.69571	1.67164	1.67913	1.4378	1.61146	1.60308	1.42536	1.47774	1.52041	1.46433	1.49659	1.37942	1.33205	1.45239	1.40714	1.38853	1.46343	1.58562	1.70765	1.44642	1.29959	1.49134	2.08982	1.76993	1.65013	1.67019	1.63415	1.73175	1.53014	1.57179	1.4387	1.36811
WalkingDistanceFromPreviousFrame	MB077B	20xUAS-CsChrimson-mVenus-attP18	10sLED	AirLED	Arena2	Cam1	20190707T212237	6	1.28245	1.36357	1.43434	1.68155	1.70558	1.62684	1.53847	1.43882	1.38402	1.55718	1.47393	1.53625	1.64625	1.57392	1.5354	1.54842	1.4548	1.46824	1.39438	1.43812	1.74857	1.63641	1.49842	1.44698	1.32649	1.31731	1.28712	1.29862	1.40485	1.41634	1.5428	2.11771	2.23545	2.06724	2.20053	1.99205	1.7747	1.62187	1.63158	1.65105	1.61888
WalkingDistanceFromPreviousFrame	MB077B	20xUAS-CsChrimson-mVenus-attP18	10sLED	AirLED	Arena2	Cam1	20200225T132745	6	1.2846	1.39488	1.26674	1.27797	1.31904	1.46855	1.26938	1.34127	1.2869	1.16405	1.18367	1.17831	1.25362	1.19873	1.16241	1.29993	1.27069	1.13817	1.22234	1.14396	1.04701	1.19942	1.28682	1.21316	1.23122	1.21003	1.18824	1.25453	1.07406	1.11491	1.45969	1.52202	1.61187	1.78394	1.955	1.50846	1.4027	1.45157	1.52157	1.5453	1.56654
WalkingDistanceFromPreviousFrame	MB077B	20xUAS-CsChrimson-mVenus-attP18	10sLED	AirLED	olfactoryArena1	Cam0	20190707T212729	6	2.15313	2.39206	2.4499	2.49806	2.62378	2.60264	2.60949	2.50817	2.56886	2.50236	2.55449	2.65398	2.51161	2.42172	2.37562	2.49103	2.50936	2.29715	2.22701	2.45398	2.10276	2.23939	2.25693	2.30971	2.20844	2.23007	2.03574	2.14987	2.12022	2.20893	2.18562	2.54264	2.19944	2.15124	2.08383	2.14852	2.07981	2.20421	2.11562	2.08011	2.08789
WalkingDistanceFromPreviousFrame	MB077B	20xUAS-CsChrimson-mVenus-attP18	10sLED	AirLED	olfactoryArena1	Cam0	20200225T133118	6	1.13501	1.4089	1.58462	1.47911	1.56505	1.55121	1.49181	1.45361	1.76892	1.62828	1.5535	1.60875	1.75769	1.46281	1.48272	1.38781	1.43048	1.60461	1.58345	1.43783	1.49132	1.5054	1.38072	1.2964	1.09471	1.14446	1.23795	1.25682	1.41021	1.49996	1.55307	1.69368	1.49825	1.56854	1.79318	1.59721	1.65684	1.64231	1.65511	1.79946	1.87202
WalkingDistanceFromPreviousFrame	MB077B	20xUAS-CsChrimson-mVenus-attP18	10sLED	AirLED	olfactoryArena1	Cam1	20190707T212729	6	2.37019	2.42523	2.60404	2.54552	2.55621	2.75357	2.92534	2.61715	2.58297	2.37981	2.46606	2.11651	2.1037	2.07215	2.37267	2.18988	2.5166	2.45303	2.51256	2.52855	2.62792	2.59727	2.93882	2.7645	2.46024	2.41706	2.72402	2.61116	2.64021	2.77087	2.72443	2.32571	2.33594	2.38126	2.68878	2.41343	2.14897	2.19139	2.3751	2.36642	2.31174
WalkingDistanceFromPreviousFrame	MB077B	20xUAS-CsChrimson-mVenus-attP18	10sLED	AirLED	olfactoryArena1	Cam1	20200225T133118	6	2.04938	2.3048	2.02902	1.96668	1.90197	2.01361	2.04066	1.94762	1.99561	1.80978	1.84455	1.73925	1.96581	2.08069	1.91652	1.9861	1.98345	1.75807	1.8121	1.7684	1.88611	1.97064	1.97817	2.03628	2.10524	1.99491	2.12375	2.17221	1.93938	1.92805	2.22334	2.01502	2.04983	1.9931	1.83721	1.68825	1.64005	1.84243	1.86374	2.00777	2.23867
WalkingDistanceFromPreviousFrame	MB077B	20xUAS-CsChrimson-mVenus-attP18	10sLED	AirLED	Arena2	Cam0	20190707T212237	5	1.97641	2.53586	2.26487	2.28533	2.07514	2.22277	2.20334	2.05824	1.9298	1.91937	1.83955	1.99109	2.05992	2.09416	1.72468	1.69391	1.59251	1.86504	1.79836	2.14379	1.88963	1.99476	1.83267	2.02874	2.06926	2.05097	1.89052	2.07987	2.14771	2.16816	2.1089	2.39107	2.31604	2.36343	2.47355	2.4795	2.21972	2.17122	2.21984	2.12176	2.1828
WalkingDistanceFromPreviousFrame	MB077B	20xUAS-CsChrimson-mVenus-attP18	10sLED	AirLED	Arena2	Cam1	20190803T100126	5	1.14882	1.30991	1.51214	1.4676	1.62214	1.44672	1.57384	1.58454	1.45393	1.41232	1.50827	1.46861	1.52954	1.49019	1.43942	1.6281	1.62565	1.41882	1.38121	1.31549	1.22813	1.49837	1.44183	1.38977	1.32804	1.31475	1.31863	1.34862	1.40846	1.39084	1.68663	2.05093	2.31663	2.43375	2.51027	2.28078	1.96142	1.86086	1.71571	1.63341	1.78309
revisit-10mmOut3mmIn-15s	MB077B	20xUAS-CsChrimson-mVenus-attP18	10sLED	AirLED	Arena2	Cam0	20190803T100126	6	0.116154	0.0983163	0.100361	0.100469	0.0893579	0.0901154	0.10754	0.105267	0.121574	0.120743	0.117929	0.151335	0.137446	0.110931	0.1079	0.101515	0.107792	0.110329	0.105735	0.104864	0.108442	0.096176	0.0901317	0.086075	0.105267	0.105391	0.11544	0.100059	0.102778	0.0989859	0.0928196	0.0838328	0.0753953	0.0670274	0.0731602	0.0829365	0.0916835	0.0757862	0.0957792	0.0919192	0.113531
revisit-10mmOut3mmIn-15s	MB077B	20xUAS-CsChrimson-mVenus-attP18	10sLED	AirLED	Arena2	Cam0	20200225T132745	6	0.167563	0.172506	0.174444	0.167778	0.158889	0.156667	0.156667	0.15	0.112222	0.104444	0.112222	0.0955556	0.11	0.0977778	0.0933333	0.080082	0.1	0.108889	0.125556	0.14346	0.133333	0.148889	0.155556	0.165556	0.136667	0.122222	0.13	0.144444	0.125556	0.0611111	0.0555556	0.0714114	0.117972	0.104444	0.108963	0.0944444	0.0945041	0.0822222	0.0711111	0.0877778	0.0988889
revisit-10mmOut3mmIn-15s	MB077B	20xUAS-CsChrimson-mVenus-attP18	10sLED	AirLED	Arena2	Cam1	20190707T212237	6	0.152659	0.133552	0.130556	0.127778	0.0907407	0.0955204	0.0925926	0.0889929	0.0736928	0.0728917	0.100192	0.0861684	0.0925926	0.0911318	0.0986638	0.10014	0.0881833	0.0866921	0.101981	0.07838	0.0905983	0.128758	0.142414	0.132026	0.130594	0.133497	0.132842	0.150337	0.144185	0.148729	0.14418	0.135497	0.119794	0.126797	0.145121	0.147765	0.158953	0.161162	0.14351	0.126022	0.120327
revisit-10mmOut3mmIn-15s	MB077B	20xUAS-CsChrimson-mVenus-attP18	10sLED	AirLED	Arena2	Cam1	20200225T132745	6	0.0842553	0.0779272	0.0760031	0.0922325	0.0990819	0.0962916	0.111151	0.116967	0.10304	0.103232	0.129165	0.156097	0.15754	0.149602	0.140142	0.13509	0.119605	0.129709	0.157944	0.164299	0.139251	0.14242	0.13205	0.118024	0.125516	0.120545	0.0962761	0.100165	0.112889	0.116272	0.113807	0.107685	0.111522	0.111881	0.102795	0.106931	0.106002	0.0892527	0.0838238	0.0671882	0.0833998
revisit-10mmOut3mmIn-15s	MB077B	20xUAS-CsChrimson-mVenus-attP18	10sLED	AirLED	olfactoryArena1	Cam0	20190707T212729	6	0.14711	0.153611	0.169243	0.147967	0.141074	0.142637	0.172163	0.177762	0.159299	0.184976	0.169321	0.137921	0.118708	0.1246	0.123797	0.138301	0.140623	0.126112	0.121446	0.111024	0.118934	0.125375	0.125262	0.152944	0.191238	0.182407	0.188661	0.163281	0.151449	0.177825	0.194587	0.205324	0.213945	0.203704	0.181352	0.182244	0.2035	0.221813	0.18326	0.156287	0.171119
revisit-10mmOut3mmIn-15s	MB077B	20xUAS-CsChrimson-mVenus-attP18	10sLED	AirLED	olfactoryArena1	Cam0	20200225T133118	6	0.0745646	0.0851295	0.0849265	0.0751225	0.0845588	0.119608	0.14473	0.156495	0.16826	0.146437	0.128607	0.165931	0.172794	0.176381	0.172304	0.171082	0.171434	0.173223	0.170895	0.171501	0.175551	0.190686	0.173652	0.193199	0.16636	0.140441	0.146559	0.155392	0.146676	0.128851	0.122549	0.128789	0.153799	0.149189	0.150108	0.163235	0.174365	0.138689	0.116959	0.113956	0.111703
revisit-10mmOut3mmIn-15s	MB077B	20xUAS-CsChrimson-mVenus-attP18	10sLED	AirLED	olfactoryArena1	Cam1	20190707T212729	6	0.131792	0.142604	0.166884	0.151918	0.12351	0.116302	0.163826	0.169799	0.177237	0.159692	0.192537	0.194682	0.179249	0.176983	0.169937	0.149456	0.149299	0.173057	0.154738	0.148913	0.152917	0.18677	0.179187	0.170461	0.182475	0.169958	0.195167	0.218382	0.178726	0.156397	0.213628	0.222207	0.248378	0.25512	0.23556	0.229147	0.245021	0.225387	0.219369	0.184003	0.190964
revisit-10mmOut3mmIn-15s	MB077B	20xUAS-CsChrimson-mVenus-attP18	10sLED	AirLED	olfactoryArena1	Cam1	20200225T133118	6	0.140489	0.154067	0.145098	0.131373	0.108824	0.0990196	0.0852941	0.0813725	0.0941176	0.0980392	0.0960784	0.0911765	0.0784314	0.072549	0.0901961	0.112745	0.110784	0.116667	0.136275	0.137487	0.118627	0.11488	0.110784	0.113911	0.133333	0.136275	0.123529	0.120588	0.123587	0.123529	0.141176	0.143137	0.159512	0.177869	0.193359	0.210784	0.238508	0.266667	0.231373	0.20098	0.210784
revisit-10mmOut3mmIn-15s	MB077B	20xUAS-CsChrimson-mVenus-attP18	10sLED	AirLED	Arena2	Cam0	20190707T212237	5	0.188726	0.1654	0.148652	0.145562	0.168323	0.182136	0.173325	0.149797	0.179853	0.190256	0.185049	0.180808	0.20644	0.205091	0.216383	0.209902	0.188369	0.171998	0.170705	0.167127	0.17884	0.169019	0.180003	0.192816	0.205055	0.179548	0.146622	0.155053	0.148063	0.127748	0.115664	0.120266	0.111954	0.119032	0.128299	0.159262	0.159995	0.160602	0.148888	0.121282	0.145792
revisit-10mmOut3mmIn-15s	MB077B	20xUAS-CsChrimson-mVenus-attP18	10sLED	AirLED	Arena2	Cam1	20190803T100126	5	0.165791	0.16	0.156262	0.140356	0.124461	0.125477	0.125999	0.144677	0.136	0.128031	0.11096	0.117692	0.121099	0.142253	0.15264	0.15003	0.140508	0.126243	0.115596	0.122203	0.108825	0.0932284	0.085653	0.0822984	0.0681538	0.0749676	0.0755077	0.0927384	0.0761835	0.0703038	0.0723357	0.0834221	0.111134	0.103304	0.101375	0.108885	0.115414	0.0938759	0.0955993	0.105355	0.118409
DeltaDistanceFromCenter	SS33917	20xUAS-CsChrimson-mVenus-attP18	10sLED	AirLED	Arena2	Cam0	20190810T133132	6	0.0312786	0.0320481	0.0280155	0.0278639	0.0357473	0.0451246	0.0520195	0.0420248	0.0340612	0.0336884	0.0410723	0.0483391	0.0557469	0.063732	0.0670986	0.0618895	0.0468304	0.0284152	0.0145271	0.00718201	-0.00122769	-0.00769717	-0.0132398	-0.0172115	-0.0179776	-0.0113154	-0.0048914	0.00034124	0.00266862	0	-0.00383489	-0.00321079	0.00414265	0.0129579	0.0340333	0.0406277	0.0504835	0.0537457	0.0575865	0.0628988	0.0742052
DeltaDistanceFromCenter	SS33917	20xUAS-CsChrimson-mVenus-attP18	10sLED	AirLED	Arena2	Cam0	20191206T095409	6	0.0217975	0.0287714	0.037069	0.0398994	0.0392835	0.0373815	0.0350663	0.0360003	0.0419082	0.043127	0.0444888	0.0457319	0.0459961	0.0479349	0.0466389	0.0506975	0.0579109	0.0655935	0.070894	0.0686247	0.0588045	0.0532555	0.0497811	0.045026	0.0438022	0.0340091	0.0188578	0.00781616	0.00374866	0	-0.00200954	0.00152218	0.0335581	0.0890353	0.165418	0.213153	0.250102	0.271724	0.274	0.284902	0.30189
DeltaDistanceFromCenter	SS33917	20xUAS-CsChrimson-mVenus-attP18	10sLED	AirLED	Arena2	Cam0	20191210T151549	6	-0.0695176	-0.0633255	-0.0592066	-0.0630554	-0.0587236	-0.0538709	-0.0586808	-0.0502476	-0.0505088	-0.0476141	-0.0501704	-0.0512139	-0.0437252	-0.0398977	-0.0369982	-0.0288245	-0.0280176	-0.0236771	-0.0210653	-0.0145874	-0.000682986	0.00761678	0.00958914	0.0129576	0.0141308	0.0116788	0.00901874	0.00460167	0.00261994	0	-0.0121799	-0.00367691	0.0326593	0.068395	0.112555	0.161231	0.199623	0.21169	0.225089	0.22758	0.224556
DeltaDistanceFromCenter	SS33917	20xUAS-CsChrimson-mVenus-attP18	10sLED	AirLED	Arena2	Cam0	20200225T103956	6	0.0686552	0.0712107	0.0652588	0.057899	0.0537678	0.050422	0.0490643	0.0471653	0.0455479	0.0437746	0.0402944	0.0333611	0.0255855	0.0218108	0.0179891	0.0140825	0.0078531	0.000553142	-0.00222131	-0.00654659	-0.010056	-0.0121653	-0.0116247	-0.0110406	-0.00822938	-0.00360094	-0.00323501	-0.00402748	-0.00292001	0	0.00355226	0.00228898	0.00441153	0.0159358	0.0263875	0.0434514	0.0534019	0.0612116	0.0669038	0.0750144	0.0780378
DeltaDistanceFromCenter	SS33917	20xUAS-CsChrimson-mVenus-attP18	10sLED	AirLED	Arena2	Cam1	20190810T131955	6	0.00178345	0.00142081	-0.00608648	-0.00548877	-0.00764522	-0.0147554	-0.0179458	-0.0169524	-0.0149836	-0.0140364	-0.00833794	-0.00432242	-0.00103554	0.00294728	0.00490525	0.0009601	-0.000724315	0.00120689	0.00341478	0.000594968	-0.00388885	-0.00581074	-0.00542993	-0.00479877	-0.00308692	-0.000293336	0.000608101	-0.00327159	-0.00366382	0	0.01517	0.0456874	0.0845902	0.130592	0.170093	0.206628	0.235637	0.252157	0.252094	0.247573	0.245814
DeltaDistanceFromCenter	SS33917	20xUAS-CsChrimson-mVenus-attP18	10sLED	AirLED	Arena2	Cam1	20190810T133132	6	0.0296643	0.0311083	0.0360327	0.0447887	0.0511791	0.0569765	0.0637741	0.0636295	0.0622962	0.065655	0.0669312	0.0652467	0.0619905	0.0607292	0.0564902	0.0498242	0.0452077	0.0393198	0.0338184	0.0298585	0.0274636	0.0247596	0.0207018	0.0162918	0.0134883	0.0110488	0.00800554	0.00803051	0.00579578	0	0.00638114	0.0395055	0.100547	0.153324	0.205435	0.240174	0.269851	0.303925	0.333878	0.358277	0.369724
DeltaDistanceFromCenter	SS33917	20xUAS-CsChrimson-mVenus-attP18	10sLED	AirLED	Arena2	Cam1	20191206T095409	6	-0.0591281	-0.0546349	-0.0580053	-0.0626729	-0.0675502	-0.0707464	-0.0709516	-0.0601515	-0.0546254	-0.0488514	-0.0445943	-0.0447991	-0.032376	-0.0216456	-0.0287239	-0.0303256	-0.0291057	-0.0254448	-0.0269236	-0.0340989	-0.0374148	-0.0294188	-0.0215319	-0.0117063	-0.00883275	-0.00512543	-0.0149697	-0.0176016	-0.0118972	0	-0.0117934	0.00236716	0.0257528	0.0452065	0.0709483	0.0928166	0.114357	0.124487	0.124494	0.102176	0.0965215
DeltaDistanceFromCenter	SS33917	20xUAS-CsChrimson-mVenus-attP18	10sLED	AirLED	Arena2	Cam1	20191210T151549	6	-0.0105075	-0.0118369	-0.0169616	-0.0112731	-0.00613346	-0.00983006	-0.0151288	-0.0176599	-0.010497	-0.0140122	-0.0172404	-0.0216622	-0.013551	-0.0146294	-0.00586725	0.000638569	0.00369889	0.00180566	-0.00315709	-0.00540644	0.000275587	0.00290637	0.00796964	0.0165121	0.0165781	0.0144855	0.0121204	0.00616478	-0.000202787	0	-0.00749772	0.0310812	0.09368	0.159837	0.20958	0.225382	0.238428	0.246735	0.241855	0.23945	0.252522
DeltaDistanceFromCenter	SS33917	20xUAS-CsChrimson-mVenus-attP18	10sLED	AirLED	Arena2	Cam1	20200225T103956	6	0.00325448	-0.00306881	-0.0109743	-0.0210404	-0.0290724	-0.02997	-0.0317173	-0.0384445	-0.0418049	-0.0450348	-0.0397923	-0.0342827	-0.0276784	-0.0174386	-0.00534375	0.00381342	0.00780258	0.0154469	0.0209775	0.0219229	0.0211858	0.0115724	-0.000138116	-0.00546692	-0.00364622	-0.00098281	-0.0032574	-0.00498739	-0.000384481	0	-0.0026213	-0.00179495	0.00979023	0.0276338	0.031566	0.0352752	0.0375534	0.0435501	0.041209	0.0400851	0.0401506
DeltaDistanceFromCenter	SS33917	20xUAS-CsChrimson-mVenus-attP18	10sLED	AirLED	olfactoryArena1	Cam0	20191206T100020	6	0.0140745	0.0115973	0.00409915	0.00900669	0.0102409	0.016341	0.0267017	0.0382945	0.0371125	0.0357252	0.0422659	0.0450158	0.0436472	0.037362	0.0309437	0.0297547	0.0243361	0.0186248	0.0189592	0.0165862	0.0160621	0.0188793	0.0251413	0.0255725	0.0236542	0.0143938	0.0131447	0.0127514	0.00813781	0	-0.00823224	-0.0231401	-0.00858222	0.0122255	0.0334633	0.0659348	0.0901307	0.108483	0.128611	0.137297	0.144228
DeltaDistanceFromCenter	SS33917	20xUAS-CsChrimson-mVenus-attP18	10sLED	AirLED	olfactoryArena1	Cam0	20191210T151805	6	0.0181316	0.0236911	0.0322897	0.0305032	0.019882	0.00841657	0.00400778	-0.00213681	-0.0128748	-0.0125484	-0.0102798	-0.00540901	-0.000693585	0.00693039	0.00472715	0.00014614	-0.00402188	-0.0052457	-0.0105237	-0.0126853	-0.0103998	-0.00535874	-0.00136058	-0.000105919	-0.00389946	-0.00588679	-0.00202518	-0.000645888	-0.000207893	0	0.00229466	0.00904175	0.0388908	0.0627522	0.0750214	0.0869771	0.109919	0.121592	0.145872	0.169559	0.188689
DeltaDistanceFromCenter	SS33917	20xUAS-CsChrimson-mVenus-attP18	10sLED	AirLED	olfactoryArena1	Cam0	20200225T104333	6	-0.00550607	-0.0114035	-0.0115814	-0.0188456	-0.0210259	-0.01919	-0.0160938	-0.0117518	-0.0188192	-0.031031	-0.0373601	-0.0419027	-0.0453658	-0.0390318	-0.030915	-0.0214569	-0.0119654	-0.00429603	0.00121222	0.00782358	0.0153529	0.019687	0.0154613	0.0166509	0.0215137	0.0209067	0.0122043	0.00232861	-0.00220927	0	-0.00451625	-0.0105493	-0.00388178	0.00949162	0.0160441	0.0172521	0.0164152	0.0111484	-0.00230364	-0.00837573	-0.00296199
DeltaDistanceFromCenter	SS33917	20xUAS-CsChrimson-mVenus-attP18	10sLED	AirLED	olfactoryArena1	Cam1	20191206T100020	6	0.00489244	0.00362311	-0.00277953	-0.00863302	-0.00845145	-0.00305358	0.00369132	0.00788428	0.013073	0.0161236	0.016799	0.0170942	0.0214592	0.024834	0.0252734	0.0252817	0.0266178	0.0282472	0.0278093	0.0258027	0.0245428	0.0226642	0.0223791	0.0146701	0.0120323	0.00970753	0.010296	0.0115757	0.00468281	0	-0.00457088	0.0188357	0.0701035	0.118223	0.165959	0.210986	0.242787	0.255223	0.264416	0.262938	0.249698
DeltaDistanceFromCenter	SS33917	20xUAS-CsChrimson-mVenus-attP18	10sLED	AirLED	olfactoryArena1	Cam1	20191210T151805	6	-0.00541714	-0.00207889	-0.0036548	-0.0024577	4.0555e-05	-0.00147723	-0.00408658	-0.00358972	-0.00268797	0.000306083	0.000442376	-0.0011903	-0.00129181	-0.000357306	0.00316778	0.00340217	0.00313993	0.00554413	0.00915426	0.00846856	0.00883627	0.0103255	0.00790726	0.00559643	0.00714399	0.00481933	0.00605666	0.00376797	0.000197772	0	-0.00325762	0.0327518	0.0546557	0.0777928	0.0895826	0.105739	0.118145	0.140131	0.158472	0.168219	0.175271
DeltaDistanceFromCenter	SS33917	20xUAS-CsChrimson-mVenus-attP18	10sLED	AirLED	olfactoryArena1	Cam1	20200225T104333	6	0.0210459	0.016815	0.012002	0.0097688	0.00655738	0.00207258	0.00143214	0.004014	0.00484376	0.00555281	0.00782749	0.00841928	0.00838647	0.00897471	0.00821146	0.0083243	0.0035834	-0.00129524	-0.00734718	-0.00689118	-0.00903969	-0.0103756	-0.0101321	-0.00963466	-0.00594034	-0.0037339	-0.000786663	0.00290321	0.00381139	0	-0.00343025	-0.00244721	0.01204	0.0338656	0.0558984	0.0681828	0.0751534	0.0858311	0.0981858	0.106954	0.116994
DeltaDistanceFromCenter	SS33917	20xUAS-CsChrimson-mVenus-attP18	10sLED	AirLED	Arena2	Cam0	20190810T131955	5	0.0385883	0.0344333	0.0270054	0.0186319	0.0193792	0.024459	0.0251584	0.0286931	0.0273846	0.0158531	0.0146134	0.025459	0.0225293	0.0248473	0.0263011	0.0183305	0.0192348	0.019687	0.0181787	0.0114956	0.00953567	-0.00156247	0.00815601	0.0116184	0.0109615	0.00388738	0.00742328	0.00849797	0.00757768	0	0.000814322	0.0030656	0.0191224	0.039497	0.0626706	0.0740167	0.0943184	0.113803	0.139287	0.149911	0.158026
Cos(Upwind)	SS33917	20xUAS-CsChrimson-mVenus-attP18	10sLED	AirLED	Arena2	Cam1	20190810T131955	6	-0.105518	-0.0961716	-0.0816714	-0.066367	-0.109599	-0.0816828	-0.0942922	-0.0736884	-0.0724948	-0.0635474	-0.0514351	-0.0891485	-0.125476	-0.112294	-0.0935721	-0.153958	-0.152684	-0.168562	-0.143516	-0.107728	-0.131746	-0.0952956	-0.0515547	-0.0728364	-0.0694304	-0.0705523	-0.103416	-0.115463	-0.0736469	-0.026992	0.15951	0.443487	0.463641	0.438669	0.486511	0.521884	0.354963	0.243201	0.179851	0.139528	0.113704
Cos(Upwind)	SS33917	20xUAS-CsChrimson-mVenus-attP18	10sLED	AirLED	Arena2	Cam0	20190810T133132	6	-0.0600902	-0.0307724	-0.00102709	-0.0243422	-0.0346893	-0.0200449	-0.0598999	-0.157424	-0.203429	-0.161725	-0.110769	-0.0972547	-0.0685538	-0.0972645	-0.107132	-0.0773857	-0.0820283	-0.116166	-0.149527	-0.132097	-0.166052	-0.175241	-0.201563	-0.158751	-0.103179	-0.115631	-0.108058	-0.121508	-0.155584	-0.194824	-0.168174	-0.0446324	0.0266285	0.116104	0.186642	0.127509	0.116543	0.0957526	0.0409871	0.0551012	0.0625767
Cos(Upwind)	SS33917	20xUAS-CsChrimson-mVenus-attP18	10sLED	AirLED	Arena2	Cam1	20190810T133132	6	-0.0601026	-0.0574679	-0.0243275	-0.060845	-0.0795783	-0.10494	-0.0906291	-0.110524	-0.0963567	-0.0807354	-0.0631109	-0.0671174	-0.0772168	-0.0841597	-0.120834	-0.129497	-0.142141	-0.145998	-0.144094	-0.150659	-0.137151	-0.152426	-0.155436	-0.150039	-0.130118	-0.174569	-0.182755	-0.142558	-0.140844	-0.154741	0.0468149	0.443023	0.499211	0.458993	0.44177	0.407295	0.427121	0.411182	0.390425	0.341942	0.307724
Cos(Upwind)	SS33917	20xUAS-CsChrimson-mVenus-attP18	10sLED	AirLED	Arena2	Cam0	20191206T095409	6	0.0243242	0.0419491	0.0768226	0.027198	0.00772107	0.0288487	0.0281456	0.0687992	0.0993948	0.0669267	0.0425088	0.038629	0.0366208	0.0468562	0.0672501	0.0883915	0.0759131	0.078262	0.0789118	0.0302795	-0.0348366	-0.0125047	-0.0425578	-0.0214107	-0.0158232	-0.078203	-0.143758	-0.126532	-0.0926486	-0.085327	-0.0648213	0.0538153	0.357389	0.481048	0.421965	0.302767	0.374394	0.325553	0.281952	0.273917	0.238821
Cos(Upwind)	SS33917	20xUAS-CsChrimson-mVenus-attP18	10sLED	AirLED	Arena2	Cam1	20191206T095409	6	0.0294671	0.00717873	-0.0117464	0.00618761	-0.0378788	-0.00874829	-0.019957	-0.0693069	-0.0594122	0.0142086	0.0145612	-0.023857	0.00802349	-0.00631694	0.00525774	-0.0109086	-0.0621794	-0.0426209	-0.0516363	-0.0535416	-0.0346501	-0.00857932	0.0486059	0.0154471	0.00700161	-0.0337015	-0.0457713	0.00720614	-0.0085279	0.000810263	0.0431429	0.228795	0.209465	0.222546	0.269061	0.308231	0.274256	0.166377	0.0668576	-0.00924242	0.0474287
Cos(Upwind)	SS33917	20xUAS-CsChrimson-mVenus-attP18	10sLED	AirLED	olfactoryArena1	Cam0	20191206T100020	6	0.00869017	0.0897373	0.0811289	0.110789	0.122393	0.121903	0.169177	0.121484	0.079259	0.0767703	0.145893	0.156637	0.125868	0.0806042	0.0355657	0.0466777	0.0403545	0.0284485	0.0607666	0.0510217	0.0592843	0.0995576	0.0751442	0.091559	0.0342175	0.0231576	0.0856536	0.0177702	-0.0510652	-0.0443734	-0.0535623	0.0408393	0.271855	0.218399	0.261605	0.197985	0.246023	0.255429	0.211103	0.0901142	0.13569
Cos(Upwind)	SS33917	20xUAS-CsChrimson-mVenus-attP18	10sLED	AirLED	olfactoryArena1	Cam1	20191206T100020	6	-0.102504	-0.0930766	-0.0923835	-0.113314	-0.0628806	-0.0397215	-0.0552567	-0.0483936	-0.027577	-0.0246857	-0.10542	-0.0959704	-0.0600625	-0.0470212	-0.0346647	-0.0398585	-0.0141942	-0.0275579	-0.0512034	-0.0625273	-0.0795405	-0.0495459	-0.0198058	-0.0227266	-0.049789	-0.0850563	-0.0820237	-0.0496724	-0.0454268	-0.064358	0.000625296	0.312842	0.404748	0.351242	0.354047	0.360773	0.333485	0.254201	0.181369	0.134242	0.130583
Cos(Upwind)	SS33917	20xUAS-CsChrimson-mVenus-attP18	10sLED	AirLED	Arena2	Cam0	20191210T151549	6	-0.0646668	-0.0699062	-0.104057	-0.194086	-0.108525	-0.0851269	-0.116608	-0.053185	-0.0310616	-0.0344932	-0.0395895	-0.0174663	-0.0817321	-0.138344	-0.117584	-0.11681	-0.126313	-0.128784	-0.131318	-0.0217906	-0.0527497	-0.0986976	-0.113256	-0.135081	-0.161668	-0.174166	-0.156582	-0.15269	-0.110536	-0.123632	-0.190447	-0.0895734	0.25462	0.274791	0.389199	0.334209	0.34737	0.297741	0.243509	0.115573	0.136283
Cos(Upwind)	SS33917	20xUAS-CsChrimson-mVenus-attP18	10sLED	AirLED	Arena2	Cam1	20191210T151549	6	-0.0808869	-0.17264	-0.154077	-0.135542	-0.170394	-0.208202	-0.238219	-0.230635	-0.192407	-0.245641	-0.222049	-0.170003	-0.0953833	-0.0949325	-0.0996687	-0.0999211	-0.0791951	-0.109145	-0.0595598	-0.0247364	-0.0372702	-0.0591855	-0.0682895	-0.0897438	-0.0504238	-0.0187588	-0.110506	-0.0908026	-0.0883206	-0.124222	0.144037	0.463723	0.362435	0.439574	0.488221	0.428767	0.328896	0.235122	0.258961	0.222093	0.1772
Cos(Upwind)	SS33917	20xUAS-CsChrimson-mVenus-attP18	10sLED	AirLED	olfactoryArena1	Cam0	20191210T151805	6	0.0322967	-0.0868452	-0.0860824	-0.0950583	-0.140721	-0.107873	-0.114679	-0.128298	-0.119617	-0.0507824	-0.00853477	-0.0526483	-0.0209769	-0.0369017	-0.0712465	-0.0980966	-0.102237	-0.0525471	-0.0515517	-0.107035	-0.0774138	-0.0384644	-0.0960399	-0.12669	-0.169753	-0.0826326	-0.0871364	-0.0902465	-0.0715945	-0.0692422	-0.0519281	0.0776651	0.294026	0.383611	0.362252	0.280894	0.297166	0.352795	0.36802	0.330407	0.265575
Cos(Upwind)	SS33917	20xUAS-CsChrimson-mVenus-attP18	10sLED	AirLED	olfactoryArena1	Cam1	20191210T151805	6	-0.264831	-0.196118	-0.182397	-0.186949	-0.155034	-0.124663	-0.121126	-0.133925	-0.123331	-0.129268	-0.135613	-0.145607	-0.171008	-0.120599	-0.0695159	-0.125295	-0.151187	-0.140338	-0.120714	-0.116557	-0.0933624	-0.103878	-0.173732	-0.190203	-0.146756	-0.0954706	-0.0818004	-0.102683	-0.131962	-0.111289	0.0119074	0.303275	0.338243	0.329468	0.2997	0.304214	0.296932	0.277483	0.253136	0.228284	0.168865
Cos(Upwind)	SS33917	20xUAS-CsChrimson-mVenus-attP18	10sLED	AirLED	Arena2	Cam0	20200225T103956	6	-0.142706	-0.111892	-0.126722	-0.145354	-0.129789	-0.128362	-0.143819	-0.164479	-0.160306	-0.141851	-0.184069	-0.207869	-0.185724	-0.157905	-0.16831	-0.147128	-0.140107	-0.163036	-0.1591	-0.165109	-0.133731	-0.104922	-0.121205	-0.161538	-0.123457	-0.118768	-0.166649	-0.155695	-0.116686	-0.0694921	-0.0507504	-0.018457	0.0913478	0.185245	0.19166	0.238163	0.177002	0.113658	0.143498	0.105439	0.0697049
Cos(Upwind)	SS33917	20xUAS-CsChrimson-mVenus-attP18	10sLED	AirLED	Arena2	Cam1	20200225T103956	6	-0.256705	-0.251815	-0.258009	-0.298499	-0.336451	-0.322588	-0.326708	-0.305834	-0.277635	-0.267807	-0.245794	-0.222024	-0.194283	-0.183278	-0.172545	-0.17223	-0.156923	-0.135653	-0.133234	-0.145195	-0.181794	-0.236043	-0.246623	-0.246055	-0.149037	-0.167124	-0.23294	-0.227915	-0.212406	-0.246501	-0.230947	-0.110312	0.157024	0.29261	0.277682	0.233814	0.220892	0.188615	0.073884	0.0622318	0.0408973
Cos(Upwind)	SS33917	20xUAS-CsChrimson-mVenus-attP18	10sLED	AirLED	olfactoryArena1	Cam0	20200225T104333	6	-0.108944	-0.0876801	-0.0543588	-0.105121	-0.0516756	-0.0156441	-0.0303317	-0.00671379	-0.0482695	-0.0236379	0.00882808	0.0110626	0.0419678	0.109472	0.120614	0.0971798	0.114671	0.109867	0.0849517	0.0867456	0.106042	0.0556935	0.0211056	0.0633814	0.075269	0.0506607	0.00357456	-0.0218514	0.0642253	0.0688926	0.0181701	0.018445	0.183951	0.188242	0.17325	0.119929	0.0877976	0.0251183	-0.033371	0.046048	0.161449
Cos(Upwind)	SS33917	20xUAS-CsChrimson-mVenus-attP18	10sLED	AirLED	olfactoryArena1	Cam1	20200225T104333	6	-0.294622	-0.289631	-0.27481	-0.275861	-0.284172	-0.292533	-0.275504	-0.26623	-0.25226	-0.231365	-0.227717	-0.267866	-0.243092	-0.232136	-0.232908	-0.239153	-0.248752	-0.248998	-0.235325	-0.191335	-0.189727	-0.194826	-0.234987	-0.231915	-0.235789	-0.246458	-0.249603	-0.228021	-0.241088	-0.281457	-0.255465	-0.114578	0.0505563	0.193408	0.304822	0.217972	0.137174	0.167025	0.131162	0.133704	0.07934
Cos(Upwind)	SS33917	20xUAS-CsChrimson-mVenus-attP18	10sLED	AirLED	Arena2	Cam0	20190810T131955	5	-0.228065	-0.239043	-0.305814	-0.323566	-0.290244	-0.263027	-0.247127	-0.249266	-0.222853	-0.292031	-0.237318	-0.207103	-0.232276	-0.25251	-0.233057	-0.265536	-0.263246	-0.27862	-0.265484	-0.276895	-0.294748	-0.264785	-0.225052	-0.201583	-0.261994	-0.269611	-0.238063	-0.262029	-0.169291	-0.245034	-0.238847	-0.162781	0.0892459	0.202011	0.165446	0.233637	0.263315	0.258975	0.237742	0.217056	0.147288
DeltaAnglefroPreviousFrame	SS33917	20xUAS-CsChrimson-mVenus-attP18	10sLED	AirLED	Arena2	Cam0	20190810T133132	6	79.791	116.061	93.3095	84.2326	85.9062	82.1553	90.2249	94.9617	83.5757	80.525	81.1574	75.347	84.0886	79.6233	91.3967	77.0414	88.6155	78.9271	76.795	91.532	76.7124	80.827	81.5628	81.4121	82.5654	78.4099	86.5627	77.6632	89.8207	81.6433	84.9345	136.11	160.383	168.571	169.136	146.104	127.743	148.66	131.775	130.033	149.514
DeltaAnglefroPreviousFrame	SS33917	20xUAS-CsChrimson-mVenus-attP18	10sLED	AirLED	Arena2	Cam0	20191206T095409	6	76.9168	104.23	91.8867	96.4238	94.779	93.2318	98.4015	98.9496	96.526	90.3933	91.9893	104.238	95.7814	93.1353	107.944	97.8592	98.0022	90.5978	100.951	90.826	93.7631	100.345	84.6265	85.4532	84.7597	108.808	86.4591	89.7972	80.6303	89.4607	90.6513	171.859	194.787	189.98	190.389	158.584	163.052	168.985	153.54	158.953	135.538
DeltaAnglefroPreviousFrame	SS33917	20xUAS-CsChrimson-mVenus-attP18	10sLED	AirLED	Arena2	Cam0	20191210T151549	6	104.48	116.401	120.279	119.14	121.274	116.832	109.006	132.13	118.812	106.739	117.849	126.303	127.695	122.949	117.356	112.281	110.224	117.256	97.0789	106.169	122.577	107.884	137.468	125.842	138.175	126.833	124.436	138.092	129.625	121.41	133.045	205.161	216.166	222.828	220.046	184.878	203.761	215.55	184.515	170.077	190.425
DeltaAnglefroPreviousFrame	SS33917	20xUAS-CsChrimson-mVenus-attP18	10sLED	AirLED	Arena2	Cam0	20200225T103956	6	88.451	52.312	55.4355	57.4831	58.8678	57.5128	53.5518	45.8097	45.8798	57.2515	48.0812	52.73	53.7112	51.3285	57.2311	49.1981	58.7407	40.7505	44.0413	43.4849	48.2281	39.3048	50.1431	49.9039	43.6362	46.9302	56.7233	49.4422	43.0284	46.4891	49.2567	95.427	128.85	141.281	143.787	154.315	141.84	126.773	146.109	136.404	133.622
DeltaAnglefroPreviousFrame	SS33917	20xUAS-CsChrimson-mVenus-attP18	10sLED	AirLED	Arena2	Cam1	20190810T131955	6	87.0041	115.824	121.653	104.451	109.565	95.2159	101.717	93.538	109.078	104.544	108.159	102.484	109.938	98.4317	103.787	106.649	109.691	98.4003	111.751	116.12	110.782	110.595	97.9883	97.0649	94.5562	97.3449	94.1561	95.8302	106.721	92.7425	155.264	161.478	151.797	162.844	160.668	162.106	174.742	160.033	175.159	174.958	178.196
DeltaAnglefroPreviousFrame	SS33917	20xUAS-CsChrimson-mVenus-attP18	10sLED	AirLED	Arena2	Cam1	20190810T133132	6	63.885	57.6305	62.7503	69.0653	54.4638	56.5542	61.9015	56.5529	63.285	62.4363	65.6509	64.3613	59.5679	56.2419	65.2944	65.265	61.5235	57.2534	58.9274	50.4401	54.2801	52.8356	55.3505	55.9734	49.6003	52.6232	51.9561	50.9022	51.4588	50.4627	125.849	144.871	168.236	160.86	154.362	156.063	148.943	148.432	154.099	140.322	161.395
DeltaAnglefroPreviousFrame	SS33917	20xUAS-CsChrimson-mVenus-attP18	10sLED	AirLED	Arena2	Cam1	20191206T095409	6	95.8003	85.8056	89.4923	103.312	89.5349	97.6323	99.8897	112.836	107.1	89.3442	99.2375	82.1584	98.0715	105.907	109.478	110.894	97.6641	90.0822	93.8459	99.753	97.9759	96.7576	107.15	87.0125	91.8863	97.3454	108.588	94.2131	97.9879	97.1809	194.507	200.297	192.783	190.923	204.214	147.351	151.305	169.061	162.029	152.852	168.047
DeltaAnglefroPreviousFrame	SS33917	20xUAS-CsChrimson-mVenus-attP18	10sLED	AirLED	Arena2	Cam1	20191210T151549	6	90.199	92.8625	100.288	96.8638	101.577	106.821	114.649	110.902	109.788	116.88	113.8	116.782	96.4066	109.109	107.435	113.627	119.711	122.242	122.489	120.07	119.464	101.385	102.326	108.832	110.277	112.524	112.596	122.085	120.374	118.406	208.92	205.272	195.572	201.712	193.447	197.193	201.054	204.821	200.448	188.169	205.343
DeltaAnglefroPreviousFrame	SS33917	20xUAS-CsChrimson-mVenus-attP18	10sLED	AirLED	Arena2	Cam1	20200225T103956	6	86.5235	63.6057	75.6929	68.0376	51.9011	58.4004	63.6328	68.6325	68.9969	57.9575	64.0756	80.024	64.6904	67.9588	72.6609	81.6748	74.0137	67.6158	68.1427	66.8628	84.3903	67.3331	65.7152	63.9424	74.0847	61.5954	74.9625	57.3495	62.5015	61.3572	140.445	176.406	173.256	188.997	186.793	165.254	163.476	151.152	161.994	155.116	159.228
DeltaAnglefroPreviousFrame	SS33917	20xUAS-CsChrimson-mVenus-attP18	10sLED	AirLED	olfactoryArena1	Cam0	20191206T100020	6	91.8217	76.7246	94.2792	89.7768	84.2432	70.8653	75.5868	85.8126	79.6658	78.3197	77.181	77.5505	70.4998	78.7034	72.7953	67.5735	73.958	80.8828	77.4204	70.2057	64.684	82.6768	72.9715	89.721	86.3855	82.0651	91.8798	77.4745	78.3452	83.0326	87.8719	177.772	223.187	246.361	219.444	203.118	199.994	177.521	163.769	154.742	164.712
DeltaAnglefroPreviousFrame	SS33917	20xUAS-CsChrimson-mVenus-attP18	10sLED	AirLED	olfactoryArena1	Cam0	20191210T151805	6	105.109	101.79	107.284	115.527	118.276	119.096	114.214	104.664	101.837	104.511	113.875	95.8184	89.8616	111.886	106.774	106.866	103.917	100.293	113.094	99.1083	96.9248	99.4506	89.302	95.6058	97.5581	99.154	99.1833	99.4301	93.1609	97.2127	97.3208	194.849	185.428	177.27	190.214	169.888	157.29	177.465	157.493	170.349	159.9
DeltaAnglefroPreviousFrame	SS33917	20xUAS-CsChrimson-mVenus-attP18	10sLED	AirLED	olfactoryArena1	Cam0	20200225T104333	6	57.3544	75.0796	90.7926	81.4155	80.7126	84.109	78.9524	84.3534	77.4736	63.9582	66.7481	78.7945	82.3752	77.7395	78.3763	81.2991	86.5956	77.6489	77.2947	79.58	73.5881	88.5683	83.7893	77.3906	72.1187	88.5003	79.3563	84.2116	75.0471	82.0312	72.9707	125.889	198.467	166.529	194.577	206.681	176.995	168.256	169.262	155.149	160.716
DeltaAnglefroPreviousFrame	SS33917	20xUAS-CsChrimson-mVenus-attP18	10sLED	AirLED	olfactoryArena1	Cam1	20191206T100020	6	83.2282	70.4208	72.1257	76.3882	71.307	74.4955	77.4252	70.5181	72.975	89.8916	78.9213	79.5136	83.3619	84.3352	91.3874	73.0389	76.6827	78.5997	77.4325	91.2442	78.5214	85.0265	84.0644	82.4979	80.6765	89.1054	94.4408	84.7711	79.3115	80.3042	162.575	193.315	220.476	198.921	169.493	152.586	163.658	170.101	147.103	155.929	169.26
DeltaAnglefroPreviousFrame	SS33917	20xUAS-CsChrimson-mVenus-attP18	10sLED	AirLED	olfactoryArena1	Cam1	20191210T151805	6	88.4666	106.601	105.079	94.9629	92.5185	104.274	111.147	102.846	96.4643	96.2583	102.681	108.906	108.569	124.317	111.674	105.415	111.406	109.857	103.36	109.98	111.058	105.853	106.396	107.015	103.609	105.986	101.793	108.251	100.84	110.765	189.954	173.151	169.995	186.107	174.781	180.301	164.042	166.849	173.098	168.807	162.168
DeltaAnglefroPreviousFrame	SS33917	20xUAS-CsChrimson-mVenus-attP18	10sLED	AirLED	olfactoryArena1	Cam1	20200225T104333	6	60.99	44.4681	38.6228	44.9111	42.3612	43.8914	36.5066	32.9968	31.6241	44.1887	43.4883	43.033	48.7426	40.4496	48.9693	41.3186	39.8627	54.2739	47.0012	52.8862	41.9668	42.6618	31.8785	37.5623	41.5153	38.7831	42.6878	50.338	41.5471	40.1361	92.553	138.056	163.302	171.799	167.717	161.075	142.44	134.925	130.304	142.288	141.418
DeltaAnglefroPreviousFrame	SS33917	20xUAS-CsChrimson-mVenus-attP18	10sLED	AirLED	Arena2	Cam0	20190810T131955	5	85.6885	102.779	111.032	103.59	95.2699	96.9274	101.489	100.608	120.619	126.309	104.03	101.24	97.7961	89.7417	94.9658	101.218	99.6202	85.4896	110.393	85.9711	89.6375	97.7361	85.201	104.911	100.784	106.692	97.0507	110.103	105.458	97.43	104.89	148.457	218.232	181.163	210.92	171.75	170.39	180.163	160.884	186.339	173.434
WalkingDistanceFromPreviousFrame	SS33917	20xUAS-CsChrimson-mVenus-attP18	10sLED	AirLED	Arena2	Cam0	20190810T133132	6	1.85604	2.07577	2.05117	2.17568	1.92768	2.23676	2.27732	2.12367	2.18099	2.24952	2.44348	2.18091	2.14831	2.03841	2.24181	2.38976	2.32324	2.04336	2.02047	1.91791	2.08133	2.06407	2.05294	2.11986	2.04456	1.93496	1.849	1.9479	1.95077	1.97944	2.04076	2.17349	1.99861	2.90582	3.48017	2.89368	2.81333	2.65113	2.61601	2.82394	2.85425
WalkingDistanceFromPreviousFrame	SS33917	20xUAS-CsChrimson-mVenus-attP18	10sLED	AirLED	Arena2	Cam0	20191206T095409	6	2.09154	2.56699	2.44121	2.40215	2.62463	2.6447	2.59689	2.86231	2.67041	2.69899	2.73638	2.59435	2.76309	2.56085	2.51184	2.52058	2.44156	2.41172	2.29278	2.51681	2.66657	2.3832	2.38193	2.5412	2.63681	2.79217	2.61265	2.54317	2.50553	2.55482	2.69223	3.0735	3.43333	4.94736	5.32294	4.92028	4.53719	4.27734	3.77188	3.91289	3.79202
WalkingDistanceFromPreviousFrame	SS33917	20xUAS-CsChrimson-mVenus-attP18	10sLED	AirLED	Arena2	Cam0	20191210T151549	6	1.9789	2.1156	2.1547	2.16816	2.18193	2.01729	2.16189	2.14139	2.26022	2.2117	2.28085	2.34287	2.39723	2.50647	2.42876	2.49433	2.37224	2.1763	2.11599	2.03361	2.13012	2.11999	1.94167	1.89347	1.82427	1.85869	1.79997	2.04371	2.11439	1.76838	1.79098	2.45387	3.21314	3.71211	4.2042	4.00884	3.91162	3.49346	3.2975	3.15013	3.05531
WalkingDistanceFromPreviousFrame	SS33917	20xUAS-CsChrimson-mVenus-attP18	10sLED	AirLED	Arena2	Cam0	20200225T103956	6	0.682536	0.882939	0.957912	0.888877	0.928166	0.94345	0.831662	0.811972	0.933532	0.723172	0.677365	0.827863	0.794532	0.812623	0.76564	0.641448	0.745351	0.758437	0.702212	0.713137	0.68432	0.586704	0.567352	0.693452	0.677746	0.695123	0.764068	0.79511	0.805872	0.810387	0.758011	0.978732	1.27359	1.89555	2.21853	2.25376	2.32368	2.43819	2.3639	2.38424	2.38271
WalkingDistanceFromPreviousFrame	SS33917	20xUAS-CsChrimson-mVenus-attP18	10sLED	AirLED	Arena2	Cam1	20190810T131955	6	2.01621	2.27929	2.24463	2.15778	1.92677	1.88632	1.87692	1.82256	1.81619	1.82061	1.90227	1.96556	1.94249	1.78717	1.7873	1.70905	1.86349	1.74589	1.75852	1.96674	2.04389	1.77352	1.70134	1.72879	1.68474	1.7091	1.66421	1.77495	1.96916	1.96547	2.48564	2.922	3.59756	3.86765	3.67116	3.25561	3.07748	2.95812	2.73176	2.85398	2.53377
WalkingDistanceFromPreviousFrame	SS33917	20xUAS-CsChrimson-mVenus-attP18	10sLED	AirLED	Arena2	Cam1	20190810T133132	6	1.35662	1.55096	1.59597	1.65211	1.75441	1.84732	1.87187	1.9061	1.90807	1.91785	1.78418	1.82768	1.85695	1.9554	1.77231	1.62741	1.64198	1.66256	1.73182	1.77964	1.66034	1.46765	1.44734	1.54727	1.44685	1.51464	1.50776	1.4381	1.53326	1.56373	2.16308	3.96247	5.00474	4.92134	4.8771	4.79297	4.5133	4.28507	4.11904	3.80649	3.43528
WalkingDistanceFromPreviousFrame	SS33917	20xUAS-CsChrimson-mVenus-attP18	10sLED	AirLED	Arena2	Cam1	20191206T095409	6	1.84079	2.13348	2.14165	2.11012	2.36219	2.35465	2.56161	2.6822	2.65328	2.33262	2.59816	2.56625	2.70244	2.44548	2.43526	2.37246	2.31369	2.25981	2.1357	2.19722	2.28098	2.58628	2.14142	2.30747	2.1793	2.34923	2.37777	2.28189	2.28167	2.13343	2.44317	2.5019	3.34528	4.02062	4.34783	4.10104	3.90768	3.38391	3.60153	3.51454	3.87674
WalkingDistanceFromPreviousFrame	SS33917	20xUAS-CsChrimson-mVenus-attP18	10sLED	AirLED	Arena2	Cam1	20191210T151549	6	1.43756	1.59348	1.81408	1.76086	1.9217	2.0433	2.07033	1.99502	1.96108	2.11625	2.08393	1.87009	1.80981	2.02282	1.72515	1.72036	1.85454	2.1372	2.17288	1.86286	2.03938	2.06655	2.06694	1.97282	1.98205	1.83118	1.90745	1.95755	2.0928	2.08344	2.72854	3.71655	4.7228	4.28577	4.19621	3.70459	3.42249	3.13822	3.19344	3.17276	2.93717
WalkingDistanceFromPreviousFrame	SS33917	20xUAS-CsChrimson-mVenus-attP18	10sLED	AirLED	Arena2	Cam1	20200225T103956	6	1.50571	1.61462	1.74832	1.46088	1.36662	1.2264	1.41874	1.60839	1.44906	1.58269	1.61097	1.74019	1.64048	1.65167	1.62849	1.78383	1.74115	1.70268	1.62905	1.41542	1.44393	1.44114	1.45752	1.46924	1.52564	1.47808	1.51513	1.74169	1.67397	1.61397	1.8024	1.84906	2.35786	2.8721	3.13683	3.29529	3.37391	3.13394	3.2389	3.29805	3.27445
WalkingDistanceFromPreviousFrame	SS33917	20xUAS-CsChrimson-mVenus-attP18	10sLED	AirLED	olfactoryArena1	Cam0	20191206T100020	6	1.56469	1.80548	1.74648	1.85792	1.73038	1.56926	1.54955	1.75496	1.80464	1.76318	1.64584	1.67888	1.42411	1.47124	1.69715	1.72078	1.78896	1.81295	1.72286	1.66107	1.51661	1.60602	1.72383	1.62835	1.75998	2.01066	2.10869	1.83514	1.71244	1.76965	2.02913	2.34666	2.75354	4.10561	4.94079	4.92061	4.46825	4.47284	4.2508	4.22763	3.91086
WalkingDistanceFromPreviousFrame	SS33917	20xUAS-CsChrimson-mVenus-attP18	10sLED	AirLED	olfactoryArena1	Cam0	20191210T151805	6	2.03768	2.05456	1.958	1.94762	1.95993	1.99368	2.18144	2.10108	2.10881	1.96144	1.96465	1.96078	1.9655	2.14626	2.22268	2.10142	2.13826	2.0499	1.92104	1.97007	1.84851	1.6093	1.42985	1.50064	1.41249	1.34328	1.53601	1.52105	1.48862	1.55996	1.64943	2.35473	3.06965	3.42795	3.74313	3.81783	3.69788	3.6628	3.37168	3.0782	2.92409
WalkingDistanceFromPreviousFrame	SS33917	20xUAS-CsChrimson-mVenus-attP18	10sLED	AirLED	olfactoryArena1	Cam0	20200225T104333	6	2.07013	2.34794	2.40468	2.54025	2.55439	2.60701	2.70929	2.51289	2.52431	2.61209	2.47304	2.81842	2.78241	2.66764	2.65844	2.70747	2.54182	2.40528	2.63795	2.77444	2.51288	2.2959	2.5577	2.42239	2.62395	2.37623	2.44141	2.38583	2.4858	2.34306	2.3642	2.44115	1.91466	2.53029	3.00894	2.9765	3.10419	3.16178	3.09431	3.1337	3.22925
WalkingDistanceFromPreviousFrame	SS33917	20xUAS-CsChrimson-mVenus-attP18	10sLED	AirLED	olfactoryArena1	Cam1	20191206T100020	6	1.28738	1.54796	1.41813	1.50787	1.5918	1.69099	1.61592	1.64767	1.49045	1.51121	1.56754	1.65792	1.64203	1.49534	1.54736	1.50385	1.6563	1.59302	1.56629	1.78692	1.73225	1.70718	1.73472	1.68733	1.79273	1.65863	1.55586	1.58061	1.69338	1.76282	2.23415	3.04114	4.20194	4.34288	4.30411	3.7129	3.35645	3.28883	2.89469	3.01227	3.02021
WalkingDistanceFromPreviousFrame	SS33917	20xUAS-CsChrimson-mVenus-attP18	10sLED	AirLED	olfactoryArena1	Cam1	20191210T151805	6	1.40018	1.57694	1.43642	1.36574	1.38686	1.48155	1.40948	1.3683	1.36551	1.34556	1.39934	1.40327	1.35132	1.52742	1.51986	1.43413	1.42925	1.30345	1.47122	1.38301	1.49002	1.52924	1.31683	1.36854	1.47653	1.52359	1.39406	1.44784	1.42867	1.50359	2.20885	2.68034	2.83215	3.03298	3.19804	3.17375	3.06554	3.01093	2.69115	2.5864	2.49663
WalkingDistanceFromPreviousFrame	SS33917	20xUAS-CsChrimson-mVenus-attP18	10sLED	AirLED	olfactoryArena1	Cam1	20200225T104333	6	0.645339	0.905369	0.965728	0.987823	0.999921	0.90358	0.949586	0.936379	0.858078	0.81059	0.92726	0.956746	0.919279	0.87682	1.05087	0.966106	0.961878	0.945217	0.967189	0.908225	0.896973	0.991688	1.13266	0.978224	0.868139	0.797492	0.825194	0.842782	0.91148	0.874938	0.988317	1.15256	1.69429	1.93286	2.26884	2.40251	2.30862	2.30167	2.22753	2.01789	2.12189
WalkingDistanceFromPreviousFrame	SS33917	20xUAS-CsChrimson-mVenus-attP18	10sLED	AirLED	Arena2	Cam0	20190810T131955	5	1.52226	1.7652	1.71479	1.59831	1.76551	2.01868	1.98791	2.011	2.13065	2.01288	1.95405	1.69731	1.65585	1.63544	1.72685	1.61723	1.68726	1.5709	1.9062	1.89796	1.80709	2.0314	1.73815	1.97373	1.84343	1.95941	1.79805	1.76906	1.91626	2.10775	1.94936	2.05039	2.33695	3.0228	3.16663	3.28442	3.22947	3.19054	3.13924	2.91587	2.72986
revisit-10mmOut3mmIn-15s	SS33917	20xUAS-CsChrimson-mVenus-attP18	10sLED	AirLED	Arena2	Cam0	20190810T133132	6	0.0789571	0.0714286	0.075	0.0763703	0.0727475	0.0595238	0.05	0.0502058	0.0511905	0.0542125	0.0656534	0.0820513	0.115842	0.140877	0.164103	0.155392	0.192915	0.188726	0.178062	0.164103	0.193773	0.226557	0.169499	0.143132	0.146154	0.17514	0.179487	0.216667	0.218438	0.20989	0.209508	0.229309	0.205128	0.217272	0.245869	0.226433	0.230138	0.234621	0.231751	0.216484	0.228158
revisit-10mmOut3mmIn-15s	SS33917	20xUAS-CsChrimson-mVenus-attP18	10sLED	AirLED	Arena2	Cam0	20191206T095409	6	0.143513	0.157292	0.167708	0.170833	0.164583	0.171875	0.184375	0.1875	0.190625	0.191667	0.189583	0.191667	0.180208	0.203125	0.20625	0.207292	0.191667	0.1875	0.166667	0.163542	0.157292	0.148958	0.14375	0.152083	0.166667	0.193209	0.190625	0.204167	0.21875	0.263542	0.265188	0.273418	0.241667	0.259711	0.306768	0.311615	0.321988	0.314381	0.298732	0.310417	0.30625
revisit-10mmOut3mmIn-15s	SS33917	20xUAS-CsChrimson-mVenus-attP18	10sLED	AirLED	Arena2	Cam0	20191210T151549	6	0.167121	0.148474	0.166984	0.177393	0.185742	0.190742	0.193526	0.216316	0.183547	0.187608	0.173397	0.163675	0.176699	0.172821	0.168069	0.180188	0.189666	0.225692	0.236505	0.214292	0.209697	0.228141	0.254939	0.236236	0.249159	0.25396	0.247666	0.246375	0.255467	0.24485	0.242175	0.22731	0.276891	0.285197	0.339226	0.420249	0.391947	0.376916	0.358024	0.383166	0.416819
revisit-10mmOut3mmIn-15s	SS33917	20xUAS-CsChrimson-mVenus-attP18	10sLED	AirLED	Arena2	Cam0	20200225T103956	6	0.0886288	0.0964286	0.107143	0.111905	0.136905	0.135714	0.141667	0.130952	0.155952	0.15119	0.147619	0.138095	0.142857	0.139286	0.17381	0.163095	0.157143	0.16098	0.159524	0.182143	0.169048	0.163095	0.162162	0.171429	0.183333	0.178571	0.17619	0.210714	0.225	0.211905	0.220238	0.231209	0.251173	0.27643	0.280353	0.301807	0.276524	0.241667	0.235714	0.236905	0.22619
revisit-10mmOut3mmIn-15s	SS33917	20xUAS-CsChrimson-mVenus-attP18	10sLED	AirLED	Arena2	Cam1	20190810T131955	6	0.18454	0.194097	0.186908	0.174863	0.181194	0.179514	0.215278	0.209722	0.214931	0.196181	0.224236	0.189792	0.187847	0.20644	0.2375	0.252083	0.2375	0.23125	0.251042	0.252031	0.226522	0.249328	0.276042	0.284565	0.25625	0.241667	0.238542	0.25	0.265881	0.272062	0.256031	0.259811	0.277708	0.272762	0.302014	0.356351	0.395516	0.330983	0.309383	0.286177	0.273779
revisit-10mmOut3mmIn-15s	SS33917	20xUAS-CsChrimson-mVenus-attP18	10sLED	AirLED	Arena2	Cam1	20190810T133132	6	0.0645509	0.0561111	0.0736111	0.0998611	0.118472	0.126458	0.127083	0.120833	0.121389	0.158472	0.156944	0.163681	0.155347	0.159097	0.1675	0.151944	0.140278	0.144444	0.15076	0.171944	0.173264	0.163611	0.148194	0.147222	0.14375	0.134326	0.140833	0.142014	0.155858	0.198819	0.210063	0.25454	0.275765	0.304583	0.264646	0.254583	0.296597	0.310808	0.323777	0.307014	0.300139
revisit-10mmOut3mmIn-15s	SS33917	20xUAS-CsChrimson-mVenus-attP18	10sLED	AirLED	Arena2	Cam1	20191206T095409	6	0.145136	0.13755	0.122174	0.122184	0.111922	0.148117	0.164967	0.153829	0.157499	0.157094	0.161044	0.174401	0.210553	0.21006	0.205838	0.231246	0.270012	0.286266	0.255628	0.274465	0.301668	0.260436	0.260604	0.268039	0.251698	0.248316	0.24757	0.245245	0.221909	0.245958	0.218601	0.229214	0.244679	0.246825	0.302271	0.302441	0.320217	0.29031	0.297363	0.2322	0.265749
revisit-10mmOut3mmIn-15s	SS33917	20xUAS-CsChrimson-mVenus-attP18	10sLED	AirLED	Arena2	Cam1	20191210T151549	6	0.0749557	0.0813607	0.115581	0.115095	0.120492	0.12473	0.122648	0.11928	0.14503	0.141257	0.132948	0.125092	0.143849	0.153718	0.144237	0.144714	0.154875	0.136407	0.18622	0.14595	0.143091	0.123426	0.124282	0.111887	0.117958	0.11758	0.141659	0.147649	0.14291	0.137431	0.169253	0.23969	0.242677	0.267458	0.293987	0.344064	0.364287	0.388753	0.352975	0.29343	0.294432
revisit-10mmOut3mmIn-15s	SS33917	20xUAS-CsChrimson-mVenus-attP18	10sLED	AirLED	Arena2	Cam1	20200225T103956	6	0.0746674	0.105635	0.138413	0.132392	0.109841	0.11746	0.111508	0.122619	0.124444	0.135	0.121905	0.114347	0.106177	0.119595	0.150591	0.166905	0.182302	0.20746	0.224127	0.22968	0.209831	0.225282	0.250714	0.24873	0.22754	0.186111	0.200397	0.241111	0.23627	0.25	0.271375	0.291349	0.309785	0.297786	0.278444	0.249963	0.29426	0.255347	0.26036	0.265506	0.269788
revisit-10mmOut3mmIn-15s	SS33917	20xUAS-CsChrimson-mVenus-attP18	10sLED	AirLED	olfactoryArena1	Cam0	20191206T100020	6	0.106346	0.0999224	0.100079	0.112987	0.112078	0.116419	0.144524	0.150159	0.158333	0.204841	0.229384	0.204916	0.191259	0.196996	0.200488	0.210169	0.216905	0.211022	0.231077	0.234316	0.237778	0.253333	0.261111	0.231508	0.257063	0.251508	0.250794	0.254091	0.259365	0.268254	0.235812	0.27	0.248046	0.27445	0.258409	0.233571	0.285556	0.237671	0.227062	0.21034	0.194444
revisit-10mmOut3mmIn-15s	SS33917	20xUAS-CsChrimson-mVenus-attP18	10sLED	AirLED	olfactoryArena1	Cam0	20191210T151805	6	0.143854	0.141741	0.160855	0.172891	0.186588	0.193681	0.181061	0.198928	0.229579	0.255306	0.244551	0.219122	0.271925	0.286829	0.261566	0.248746	0.225672	0.249905	0.254392	0.245726	0.263278	0.287746	0.278939	0.262188	0.228374	0.245236	0.249832	0.249939	0.259388	0.264958	0.275207	0.270534	0.282806	0.284422	0.294317	0.317358	0.323352	0.297644	0.271445	0.302329	0.330994
revisit-10mmOut3mmIn-15s	SS33917	20xUAS-CsChrimson-mVenus-attP18	10sLED	AirLED	olfactoryArena1	Cam0	20200225T104333	6	0.138372	0.124444	0.126667	0.117778	0.0888889	0.107778	0.0988889	0.104444	0.137778	0.156667	0.132222	0.114444	0.0933333	0.128889	0.162222	0.166667	0.166667	0.185556	0.187778	0.18	0.182222	0.168889	0.172222	0.197778	0.213333	0.204444	0.195556	0.186667	0.238889	0.27	0.295556	0.335556	0.311223	0.333333	0.291338	0.263425	0.29563	0.298175	0.308095	0.316905	0.286984
revisit-10mmOut3mmIn-15s	SS33917	20xUAS-CsChrimson-mVenus-attP18	10sLED	AirLED	olfactoryArena1	Cam1	20191206T100020	6	0.134462	0.159524	0.154762	0.187302	0.194444	0.180952	0.187302	0.215079	0.17381	0.157937	0.159524	0.161905	0.172222	0.178571	0.163492	0.166667	0.16746	0.187302	0.175621	0.18254	0.169974	0.17706	0.154762	0.163519	0.18515	0.19249	0.201254	0.206349	0.230059	0.236804	0.235714	0.25873	0.262565	0.26556	0.289823	0.344794	0.34127	0.335873	0.305742	0.286896	0.288953
revisit-10mmOut3mmIn-15s	SS33917	20xUAS-CsChrimson-mVenus-attP18	10sLED	AirLED	olfactoryArena1	Cam1	20191210T151805	6	0.16227	0.170211	0.179089	0.174959	0.178989	0.18339	0.205453	0.219065	0.226502	0.221602	0.223103	0.215072	0.223144	0.236916	0.242332	0.249981	0.249546	0.261952	0.271632	0.282459	0.278205	0.279344	0.289594	0.285366	0.26609	0.248444	0.245615	0.250477	0.235508	0.245493	0.235054	0.295553	0.289677	0.302441	0.273211	0.279455	0.295844	0.283284	0.26862	0.251471	0.247811
revisit-10mmOut3mmIn-15s	SS33917	20xUAS-CsChrimson-mVenus-attP18	10sLED	AirLED	olfactoryArena1	Cam1	20200225T104333	6	0.0631521	0.0627505	0.0416667	0.0354167	0.0479167	0.05625	0.0458333	0.0520833	0.059375	0.0625	0.0791667	0.0833333	0.1	0.102083	0.103125	0.119792	0.132292	0.129167	0.119792	0.114714	0.123958	0.122917	0.1	0.0927083	0.110417	0.123041	0.13125	0.138542	0.160417	0.169792	0.165756	0.151042	0.113015	0.133333	0.166667	0.157292	0.176186	0.1625	0.179167	0.214583	0.202083
revisit-10mmOut3mmIn-15s	SS33917	20xUAS-CsChrimson-mVenus-attP18	10sLED	AirLED	Arena2	Cam0	20190810T131955	5	0.20516	0.227187	0.219128	0.223048	0.205333	0.19419	0.192931	0.182667	0.15581	0.117156	0.107031	0.100003	0.11419	0.104762	0.115205	0.143698	0.156515	0.161714	0.158476	0.135994	0.131429	0.130561	0.141714	0.153048	0.172324	0.16718	0.193525	0.213905	0.228188	0.294912	0.289508	0.267404	0.285524	0.228515	0.209238	0.269575	0.328571	0.353619	0.409351	0.388317	0.346
DeltaDistanceFromCenter	SS33918	20xUAS-CsChrimson-mVenus-attP18	10sLED	AirLED	Arena2	Cam0	20190810T123250	6	-0.109881	-0.105994	-0.0952431	-0.0877576	-0.0913893	-0.0839972	-0.069627	-0.0583836	-0.0475391	-0.027171	-0.0078874	0.0019014	0.00100027	-0.000946067	-0.00533892	-0.00493604	-0.0116328	-0.00354303	0.0016019	-0.00179704	-0.00810246	-0.00930283	-0.00845481	-0.003078	0.00751621	0.0094163	0.00618955	0.0103754	0.0047756	0	-0.00635195	-0.00552842	0.0027823	0.0273146	0.0422056	0.0463872	0.0566314	0.0720541	0.077334	0.0900895	0.0999992
DeltaDistanceFromCenter	SS33918	20xUAS-CsChrimson-mVenus-attP18	10sLED	AirLED	Arena2	Cam0	20190810T124603	6	0.0154395	0.0218027	0.0268252	0.029624	0.0277517	0.0261477	0.0241193	0.0209869	0.0171065	0.0177222	0.0208603	0.0222251	0.0278529	0.0261758	0.0222985	0.0230508	0.0237642	0.0265122	0.028477	0.0291676	0.0255438	0.031384	0.036051	0.0347208	0.0296126	0.0253429	0.0190687	0.0110936	0.0046981	0	0.00277765	0.0056909	0.0152942	0.0444028	0.0800551	0.109312	0.127289	0.146583	0.166066	0.180116	0.183424
DeltaDistanceFromCenter	SS33918	20xUAS-CsChrimson-mVenus-attP18	10sLED	AirLED	Arena2	Cam0	20191216T224610	6	-0.0221581	-0.0128006	-0.00826344	-0.00827616	-0.0145576	-0.0189428	-0.0130531	-0.016106	-0.0261867	-0.0397033	-0.0485256	-0.0507787	-0.0522478	-0.0528705	-0.0575456	-0.0554481	-0.0405418	-0.0248501	-0.0211257	-0.0213016	-0.0247225	-0.0210365	-0.018625	-0.0132667	-0.0112308	-0.00494288	-0.00267988	-0.00060466	-0.00164516	0	0.00279044	0.00544816	0.0271976	0.0707839	0.11001	0.136506	0.140076	0.142731	0.152109	0.169778	0.174355
DeltaDistanceFromCenter	SS33918	20xUAS-CsChrimson-mVenus-attP18	10sLED	AirLED	Arena2	Cam0	20200225T105250	6	-0.00806741	-0.00788102	-0.00607389	-0.00139057	-0.00242223	0.000325676	-0.000608006	-0.00534129	-0.0085514	-0.00605888	-0.00329108	-0.00445155	-0.00782902	-0.0114109	-0.01191	-0.0108263	-0.00850457	-0.00714526	-0.00532518	-0.00460878	-0.00510564	-0.00444768	-0.00292257	-0.00392522	-0.000942222	0.00195196	0.00405973	0.00470164	0.00385127	0	-0.00205989	-0.00812282	-0.00497637	0.00329635	0.00463359	0.0123112	0.0252093	0.0328045	0.0416204	0.051032	0.0593517
DeltaDistanceFromCenter	SS33918	20xUAS-CsChrimson-mVenus-attP18	10sLED	AirLED	Arena2	Cam0	20200227T004515	6	-0.0404219	-0.0402712	-0.042055	-0.0462258	-0.0467641	-0.0508848	-0.059138	-0.0631189	-0.0650969	-0.0660546	-0.067853	-0.0714007	-0.0764598	-0.0745095	-0.072979	-0.0747943	-0.0739968	-0.0713574	-0.0627524	-0.0516754	-0.0475074	-0.0338167	-0.0229349	-0.0161346	-0.0110054	-0.010652	-0.00896994	-0.00331224	-0.00601476	0	0.00207958	0.000432562	0.0258703	0.0643967	0.101702	0.126969	0.13596	0.14479	0.152013	0.153619	0.148479
DeltaDistanceFromCenter	SS33918	20xUAS-CsChrimson-mVenus-attP18	10sLED	AirLED	Arena2	Cam1	20190810T123250	6	0.0294951	0.036001	0.0468729	0.046671	0.0469505	0.0419942	0.0396109	0.0396318	0.0372838	0.0318536	0.0292067	0.019814	0.0118674	0.0100059	0.00497991	-0.0026427	-0.00564536	-0.00837211	-0.0126946	-0.0146655	-0.0155838	-0.0112084	-0.006448	-0.00749112	-0.00635121	0.000706467	0.0015203	-0.0058741	-0.00471738	0	0.00436524	0.0329384	0.0917106	0.147572	0.181863	0.200994	0.211743	0.223121	0.224248	0.222272	0.225588
DeltaDistanceFromCenter	SS33918	20xUAS-CsChrimson-mVenus-attP18	10sLED	AirLED	Arena2	Cam1	20190810T124603	6	0.0572057	0.0606012	0.0600875	0.062495	0.0636306	0.0576217	0.0481707	0.043782	0.0388016	0.0345391	0.0287102	0.0261977	0.0260295	0.0201389	0.0184128	0.0223636	0.0310102	0.0370966	0.0351347	0.0267486	0.0189241	0.0124616	0.00333752	-0.00927277	-0.0175046	-0.0223877	-0.0234324	-0.0160273	-0.0060191	0	0.00970873	0.0320821	0.0568618	0.0746993	0.0969306	0.116572	0.139123	0.152952	0.152834	0.148648	0.145559
DeltaDistanceFromCenter	SS33918	20xUAS-CsChrimson-mVenus-attP18	10sLED	AirLED	Arena2	Cam1	20191216T224610	6	0.0343572	0.048722	0.0533596	0.0527732	0.0470197	0.0436594	0.0386646	0.0455367	0.046773	0.0445005	0.0463518	0.0435745	0.0341903	0.0441798	0.0452153	0.0385147	0.0327613	0.0286443	0.0296636	0.0332704	0.0261941	0.0286281	0.0352469	0.041052	0.0343223	0.0272361	0.0239514	0.0125636	0.00137607	0	0.00249255	0.0187586	0.0314407	0.0565318	0.100132	0.142583	0.160555	0.182409	0.194326	0.195269	0.20095
DeltaDistanceFromCenter	SS33918	20xUAS-CsChrimson-mVenus-attP18	10sLED	AirLED	Arena2	Cam1	20200225T105250	6	-0.0129319	-0.0104778	-0.0243946	-0.0334581	-0.0358769	-0.0432283	-0.0403772	-0.0328942	-0.0297748	-0.0291422	-0.0166637	-0.0183269	-0.0115969	-0.0108069	-0.00501447	0.00178657	0.00707716	0.0168913	0.0145301	0.00444041	-0.00296746	-0.0115016	-0.0190866	-0.0209444	-0.0195666	-0.0161548	-0.0141474	-0.00641678	-0.00311542	0	0.00648493	0.0141608	0.0295432	0.0369444	0.0347973	0.0441554	0.0488459	0.0471658	0.0522793	0.054492	0.0527598
DeltaDistanceFromCenter	SS33918	20xUAS-CsChrimson-mVenus-attP18	10sLED	AirLED	Arena2	Cam1	20200227T004515	6	-0.0264533	-0.024504	-0.0314434	-0.0354647	-0.0393465	-0.0399723	-0.0330125	-0.0276263	-0.0250801	-0.0261092	-0.0340565	-0.0327275	-0.0278415	-0.0204506	-0.0129388	-0.0131231	-0.0134024	-0.0114685	-0.0156774	-0.0161215	-0.0116591	-0.00433953	-0.00134849	-0.00492904	-0.00564375	-0.00105746	0.00153125	-0.00174372	0.00355022	0	-0.005542	0.0173132	0.0631736	0.103259	0.129507	0.139314	0.156231	0.168586	0.174295	0.174077	0.177989
DeltaDistanceFromCenter	SS33918	20xUAS-CsChrimson-mVenus-attP18	10sLED	AirLED	olfactoryArena1	Cam0	20191216T225003	6	-0.0920829	-0.0742283	-0.0574509	-0.0553304	-0.069061	-0.0795738	-0.0614999	-0.0775943	-0.08757	-0.0858298	-0.0664907	-0.0522788	-0.0658164	-0.0390604	-0.0209083	-0.0137748	0.014165	0.0534189	0.0633312	0.0646345	0.0646648	0.0639179	0.0667025	0.0720923	0.0788372	0.0739992	0.0568117	0.0285062	-0.000554207	0	0.00540428	-0.00403719	0.0305763	0.0717471	0.0974491	0.116357	0.142986	0.148781	0.150522	0.149724	0.138642
DeltaDistanceFromCenter	SS33918	20xUAS-CsChrimson-mVenus-attP18	10sLED	AirLED	olfactoryArena1	Cam0	20200225T105606	6	0.00967877	0.0107843	0.00198748	-0.00393219	-0.0129769	-0.0195481	-0.0133446	-0.00294399	0.00586875	0.0151494	0.0197384	0.023722	0.0214655	0.0220059	0.0228248	0.0192922	0.0137441	0.00768224	-0.000599913	-0.00626931	-0.00840264	-0.00683829	-0.00742316	-0.0166098	-0.0274796	-0.0268328	-0.020485	-0.0136944	-0.00425087	0	0.00229417	0.00294094	0.0059281	0.0189202	0.026491	0.0279599	0.0353755	0.038461	0.0400033	0.0434944	0.0461842
DeltaDistanceFromCenter	SS33918	20xUAS-CsChrimson-mVenus-attP18	10sLED	AirLED	olfactoryArena1	Cam0	20200227T003353	6	0.0053002	-0.00475744	-0.00567069	-0.0125497	-0.0120685	-0.0103608	-0.0146931	-0.015673	-0.0195019	-0.0269085	-0.0341765	-0.0315987	-0.0314659	-0.0289306	-0.0295646	-0.033571	-0.0274574	-0.0196662	-0.0211718	-0.0168842	-0.0149239	-0.0156077	-0.0187441	-0.0178564	-0.0181533	-0.0189764	-0.0188039	-0.0125985	-0.003512	0	0.00196063	0.00535846	0.0283242	0.0552937	0.0810328	0.10214	0.128488	0.147256	0.166803	0.177816	0.178385
DeltaDistanceFromCenter	SS33918	20xUAS-CsChrimson-mVenus-attP18	10sLED	AirLED	olfactoryArena1	Cam1	20191216T225003	6	0.00212948	0.00850568	0.0128702	0.0129438	0.00452533	0.00516857	0.0107847	0.0136506	0.0185979	0.0213701	0.0257685	0.0318367	0.0387325	0.0423878	0.0395985	0.0336791	0.0259234	0.0271962	0.0283841	0.0243037	0.0216661	0.0178757	0.0179276	0.0146548	0.0133464	0.0117392	0.00746774	-0.000548265	-0.00439306	0	0.0117749	0.0338751	0.0592348	0.092794	0.117402	0.133817	0.147921	0.162497	0.171468	0.18865	0.200368
DeltaDistanceFromCenter	SS33918	20xUAS-CsChrimson-mVenus-attP18	10sLED	AirLED	olfactoryArena1	Cam1	20200225T105606	6	0.0130465	0.00370893	-0.00390641	-0.00561692	-0.00700052	-0.00704016	-0.00917424	-0.00814723	-0.00670424	-0.00112207	0.00747757	0.00939676	0.00684493	0.000697228	-0.00106973	-0.000360493	0.00167251	-0.00225904	-0.00415248	-0.00715223	-0.00682541	-0.00452029	0.00200388	0.00382784	0.00348727	-0.00263786	-0.00390114	-0.00118843	0.00204243	0	0.00168378	0.010879	0.025661	0.0418333	0.0571525	0.0736709	0.0769622	0.0728848	0.0718975	0.0762907	0.0780156
DeltaDistanceFromCenter	SS33918	20xUAS-CsChrimson-mVenus-attP18	10sLED	AirLED	olfactoryArena1	Cam1	20200227T003353	6	0.0176278	0.0141147	0.013684	0.0195522	0.0201325	0.00678549	-0.00393614	-0.00565566	-0.00663834	-0.00844362	-0.0104695	-0.00714473	-0.00803464	-0.00520321	0.000630755	0.00892442	0.00727246	0.00183251	0.0017531	0.000445227	0.00140897	0.00413624	0.00722364	0.00383267	0.00230206	0.00284083	0.000786205	3.6233e-05	-0.00208897	0	0.00853342	0.0338825	0.0727275	0.0999506	0.12006	0.139331	0.156688	0.165848	0.169482	0.17166	0.171814
Cos(Upwind)	SS33918	20xUAS-CsChrimson-mVenus-attP18	10sLED	AirLED	Arena2	Cam0	20190810T123250	6	-0.126274	-0.0386663	0.0751436	0.0587883	0.062122	0.12555	0.166292	0.11406	0.0642436	0.0777616	0.121925	0.0581581	-0.0368024	-0.089746	-0.0450972	-0.0258355	-0.0283337	0.0102565	0.0481726	-0.027478	-0.0402455	-0.0369952	-0.00529312	-0.0199663	-0.00589145	-0.0187162	-0.0217475	0.0177769	-0.0060506	-0.0771663	-0.0916978	-0.00170152	0.177402	0.351982	0.272568	0.205322	0.126836	0.132136	0.071152	0.161273	0.103574
Cos(Upwind)	SS33918	20xUAS-CsChrimson-mVenus-attP18	10sLED	AirLED	Arena2	Cam0	20190810T124603	6	-0.0926171	-0.0380949	-0.045304	-0.0330633	-0.0472017	-0.0256802	-0.0717908	-0.0716126	-0.0722577	-0.036543	-0.0248575	-0.0266613	0.00446017	-0.0442451	-0.0453659	-0.0134435	-0.00518211	-0.0200953	-0.00551172	-0.0287628	-0.011343	0.0485985	0.0276934	-0.0424808	-0.0413416	-0.0693803	-0.120803	-0.167848	-0.150444	-0.153739	-0.119452	-0.0696622	0.190221	0.322297	0.338819	0.395357	0.386377	0.467612	0.394819	0.332017	0.30965
Cos(Upwind)	SS33918	20xUAS-CsChrimson-mVenus-attP18	10sLED	AirLED	Arena2	Cam0	20191216T224610	6	-0.0171103	0.0658422	0.0331336	-0.0320033	-0.0756506	-0.0617139	-0.0390434	-0.0696564	-0.112885	-0.140269	-0.0912975	-0.0568623	-0.0186714	0.00499311	0.00848735	0.0499868	0.101149	0.119976	0.0362636	0.0797664	0.159368	0.177191	0.129359	0.0729835	0.0515005	0.113613	0.0986944	0.0341406	0.0480682	0.0738073	0.0776407	0.16266	0.35784	0.411673	0.388646	0.346939	0.319062	0.31884	0.335597	0.310868	0.296954
Cos(Upwind)	SS33918	20xUAS-CsChrimson-mVenus-attP18	10sLED	AirLED	Arena2	Cam0	20200225T105250	6	0.00844679	-0.0407352	-0.0867152	-0.0759752	-0.0464095	-0.0500551	-0.0433594	-0.0721265	-0.0532706	-0.0246667	-0.0745668	-0.0665252	-0.0573447	-0.0772418	-0.0487095	-0.0548582	-0.0274245	-0.0260623	-0.0587106	-0.104665	-0.083983	-0.0731288	-0.0646441	-0.064081	-0.0692682	-0.0683236	-0.080376	-0.0523999	-0.0767617	-0.0900696	-0.0503627	-0.0598153	0.115725	0.121167	0.0838195	0.172648	0.219477	0.192409	0.131566	0.0973649	0.113653
Cos(Upwind)	SS33918	20xUAS-CsChrimson-mVenus-attP18	10sLED	AirLED	Arena2	Cam0	20200227T004515	6	-0.107524	-0.110893	-0.170441	-0.195684	-0.161677	-0.190039	-0.176927	-0.202761	-0.164183	-0.153091	-0.134553	-0.120724	-0.096451	-0.100743	-0.0589915	-0.0917184	-0.0458731	-0.0593958	-0.01996	-0.0269414	-0.0337023	0.0106286	-0.0340484	-0.00632934	0.00545355	-0.0488803	-0.0199509	-0.0295958	-0.0537752	-0.0778574	-0.117323	0.0405743	0.382155	0.378682	0.33227	0.278964	0.259925	0.27595	0.207432	0.173526	0.226469
Cos(Upwind)	SS33918	20xUAS-CsChrimson-mVenus-attP18	10sLED	AirLED	Arena2	Cam1	20190810T123250	6	-0.020123	0.0242669	0.00649899	-0.0153602	-0.0174799	-0.0561554	-0.0668455	-0.0863552	-0.0880991	-0.0767799	-0.0825165	-0.134624	-0.104873	-0.0487855	-0.084286	-0.132252	-0.115524	-0.0985358	-0.08772	-0.127474	-0.0954331	-0.0547158	-0.0376593	-0.083067	-0.0804781	0.0337339	0.0230365	-0.0201631	-0.0823214	-0.122904	-0.0220948	0.279494	0.355244	0.344937	0.314087	0.286221	0.249525	0.230918	0.120531	0.127275	0.100041
Cos(Upwind)	SS33918	20xUAS-CsChrimson-mVenus-attP18	10sLED	AirLED	Arena2	Cam1	20190810T124603	6	-0.066548	0.00819777	0.0174583	-0.00312123	0.00650801	-0.00357396	-0.0174859	-0.0245239	-0.0522866	-0.0499984	-0.0300913	0.00555795	0.0151996	-0.026567	-0.0169131	-0.00110266	0.0268891	0.0650314	-0.00270929	-0.0524579	-0.0665053	-0.0392697	-0.0678121	-0.0761505	-0.0125679	-0.0258049	0.0110571	0.0349719	0.0614004	0.0326049	0.0843132	0.231021	0.301861	0.377215	0.393369	0.33999	0.284632	0.267132	0.183868	0.200737	0.194493
Cos(Upwind)	SS33918	20xUAS-CsChrimson-mVenus-attP18	10sLED	AirLED	Arena2	Cam1	20191216T224610	6	-0.0365824	-0.106769	-0.149562	-0.106613	-0.111811	-0.0503212	0.0310548	0.0662724	0.00545166	-0.0127687	-0.0654113	-0.15523	-0.206805	-0.146136	-0.128239	-0.141438	-0.102673	-0.0571965	-0.032308	-0.0815384	-0.12386	-0.128819	-0.0884589	-0.037564	-0.0526468	-0.121321	-0.0760272	-0.103157	-0.110726	-0.0668832	0.0339878	0.14801	0.143163	0.250934	0.444855	0.384066	0.268929	0.233768	0.214942	0.153737	0.174089
Cos(Upwind)	SS33918	20xUAS-CsChrimson-mVenus-attP18	10sLED	AirLED	Arena2	Cam1	20200225T105250	6	-0.167118	-0.197398	-0.233109	-0.178258	-0.108489	-0.092467	-0.107774	-0.0806106	-0.125734	-0.123996	-0.0647524	-0.13997	-0.118491	-0.121836	-0.112592	-0.142983	-0.142385	-0.124019	-0.168397	-0.185552	-0.0943361	-0.112858	-0.149986	-0.119901	-0.0849521	-0.0789061	-0.0866469	-0.111075	-0.115036	-0.112	-0.0708219	-0.0035406	0.0850561	0.0976802	0.0914835	0.142301	0.101806	0.069149	0.0739836	0.0681662	0.100661
Cos(Upwind)	SS33918	20xUAS-CsChrimson-mVenus-attP18	10sLED	AirLED	Arena2	Cam1	20200227T004515	6	0.058561	-0.0240069	-0.0308586	0.0198442	-0.0207123	0.0598984	0.103718	0.0179301	-0.00265849	-0.0643418	-0.0522995	-0.0714359	-0.0547545	-0.0785981	-0.109009	-0.151277	-0.108132	-0.091695	-0.118489	-0.0637548	-0.0523522	-0.047031	-0.015523	-0.0656596	-0.111448	-0.0138016	-0.0166621	-0.0344521	-0.0171266	-0.105488	0.0834675	0.481538	0.50211	0.435772	0.391884	0.327807	0.379079	0.302758	0.255699	0.327072	0.251338
Cos(Upwind)	SS33918	20xUAS-CsChrimson-mVenus-attP18	10sLED	AirLED	olfactoryArena1	Cam0	20191216T225003	6	-0.0355663	0.0537892	0.0771557	0.130683	0.0415761	-0.00029424	0.0554394	0.0602555	0.104918	0.131744	0.239388	0.182091	0.124426	0.163383	0.081776	0.207053	0.191242	0.243817	0.203383	0.175144	0.12217	0.081985	0.110283	0.129436	0.080456	-0.033679	-0.165436	-0.114293	-0.0275944	0.104386	-0.129886	-0.0128887	0.254089	0.275355	0.177575	0.232127	0.258058	0.278343	0.243777	0.0326044	-0.0078106
Cos(Upwind)	SS33918	20xUAS-CsChrimson-mVenus-attP18	10sLED	AirLED	olfactoryArena1	Cam0	20200225T105606	6	-0.0520709	-0.0491554	-0.0605904	-0.0402039	-0.0648106	-0.112575	-0.0765728	-0.0766912	-0.0687978	-0.0602956	-0.0305622	-0.0571669	-0.0787917	-0.0649394	-0.0773709	-0.0819275	-0.0983711	-0.109711	-0.168489	-0.111568	-0.0804487	-0.0871854	-0.116805	-0.137688	-0.134747	-0.121916	-0.099457	-0.0696573	-0.0717552	-0.109409	-0.112153	-0.0942188	0.0606529	0.212783	0.121549	0.15066	0.139855	0.133136	0.131263	0.11641	0.0894387
Cos(Upwind)	SS33918	20xUAS-CsChrimson-mVenus-attP18	10sLED	AirLED	olfactoryArena1	Cam0	20200227T003353	6	-0.0828924	-0.174718	-0.150055	-0.163958	-0.117863	-0.111304	-0.109201	-0.138746	-0.171624	-0.134326	-0.117789	-0.114858	-0.0896348	-0.0713057	-0.0714052	-0.0236486	0.00849998	-0.0179371	-0.067741	-0.0523076	-0.0535742	-0.0735257	-0.135504	-0.150948	-0.122131	-0.115972	-0.0993801	-0.0962255	-0.117693	-0.186463	-0.184479	0.0342072	0.381731	0.34068	0.324604	0.366794	0.439269	0.408803	0.33849	0.297798	0.315381
Cos(Upwind)	SS33918	20xUAS-CsChrimson-mVenus-attP18	10sLED	AirLED	olfactoryArena1	Cam1	20191216T225003	6	-0.135865	-0.03813	-0.0300389	-0.0439122	-0.069181	-0.00215381	-0.00253748	-0.0435941	-0.0340497	-0.039646	0.00894673	0.0113195	0.0375892	0.0385826	-0.0136647	-0.0851054	-0.0999269	-0.0562039	-0.0579603	-0.0580585	-0.0834542	-0.0890393	-0.0744836	-0.103333	-0.0790292	-0.0901916	-0.0757167	-0.0959889	-0.0323767	0.00269706	0.155878	0.389823	0.323649	0.379234	0.323197	0.378326	0.358123	0.324618	0.390286	0.378934	0.295817
Cos(Upwind)	SS33918	20xUAS-CsChrimson-mVenus-attP18	10sLED	AirLED	olfactoryArena1	Cam1	20200225T105606	6	-0.206194	-0.233104	-0.218417	-0.22426	-0.191252	-0.209964	-0.228259	-0.227522	-0.197544	-0.153113	-0.175764	-0.193227	-0.213531	-0.210912	-0.188496	-0.178778	-0.211447	-0.24982	-0.243569	-0.225001	-0.232796	-0.209285	-0.180442	-0.183772	-0.20364	-0.238639	-0.204286	-0.213972	-0.216661	-0.25496	-0.147057	0.0349584	0.142852	0.137822	0.157671	0.157039	-0.0134175	-0.0747276	-0.0396163	0.000563725	0.0348682
Cos(Upwind)	SS33918	20xUAS-CsChrimson-mVenus-attP18	10sLED	AirLED	olfactoryArena1	Cam1	20200227T003353	6	-0.0960427	-0.0793943	-0.0130222	-0.0608661	-0.123428	-0.183731	-0.167015	-0.157572	-0.144537	-0.15156	-0.154393	-0.134177	-0.170931	-0.145	-0.166047	-0.1466	-0.18828	-0.210636	-0.195675	-0.200983	-0.166335	-0.151919	-0.1308	-0.111812	-0.0920471	-0.110828	-0.166286	-0.152806	-0.123914	-0.0692451	0.0944466	0.388548	0.445411	0.351259	0.417339	0.364958	0.33563	0.255563	0.207627	0.252453	0.281601
DeltaAnglefroPreviousFrame	SS33918	20xUAS-CsChrimson-mVenus-attP18	10sLED	AirLED	Arena2	Cam0	20190810T123250	6	126.317	100.589	141.957	120.649	126.263	95.6409	96.8234	100.092	105.442	115.061	114.111	118.935	101.459	121.719	124.851	104.938	112.275	116.303	108.669	97.4585	106.297	107.135	116.683	104.346	130.519	99.4302	105.347	122.876	96.9571	93.7801	111.94	183.214	211.944	153.855	152.962	173.599	174.977	157.845	165.789	149.451	166.738
DeltaAnglefroPreviousFrame	SS33918	20xUAS-CsChrimson-mVenus-attP18	10sLED	AirLED	Arena2	Cam0	20190810T124603	6	63.79	58.9013	51.9678	50.3041	53.5261	54.7558	56.8603	57.1182	56.7467	57.3761	54.1178	61.4654	60.2467	67.678	52.1927	51.0112	57.2965	50.5935	64.7379	70.3796	64.6403	53.9974	59.3958	50.8651	59.1882	62.8118	56.9561	60.1852	55.7752	55.6072	47.9567	102.637	162.329	145.566	137.012	145.868	128.482	126.805	114.489	111.517	114.076
DeltaAnglefroPreviousFrame	SS33918	20xUAS-CsChrimson-mVenus-attP18	10sLED	AirLED	Arena2	Cam0	20191216T224610	6	89.4312	91.6379	91.3423	84.9777	90.7653	88.5787	85.0671	83.2978	89.3719	87.1209	92.3655	92.3263	81.052	89.2962	85.9301	92.5166	79.6177	91.3128	76.0052	82.1628	90.6955	68.363	96.1957	99.5025	88.093	89.05	78.6974	91.3199	87.4169	87.0044	89.3523	162.752	170.897	163.044	157.486	168.048	144.196	138.042	130.982	131.99	113.441
DeltaAnglefroPreviousFrame	SS33918	20xUAS-CsChrimson-mVenus-attP18	10sLED	AirLED	Arena2	Cam0	20200225T105250	6	77.0435	84.1904	79.9895	84.6755	84.5174	82.9061	76.1417	75.6304	75.9726	77.1972	85.4955	85.0327	81.9978	82.0301	81.8541	76.3207	80.1327	70.7476	72.0814	77.9135	72.1894	74.2789	71.6771	73.989	77.9764	68.133	64.2627	69.4431	77.8358	89.3599	83.0762	154.888	209.467	170.936	173.212	172.665	158.631	147.647	149.331	146.597	149.529
DeltaAnglefroPreviousFrame	SS33918	20xUAS-CsChrimson-mVenus-attP18	10sLED	AirLED	Arena2	Cam0	20200227T004515	6	108.024	116.594	124.509	114.484	97.1928	92.4547	101.069	98.8472	111.705	103.768	106.245	107.471	104.757	117.809	129.131	103.196	108.26	101.901	103.111	113.619	111.461	117.474	124.24	116.912	130.344	115.656	125.95	124.309	120.781	104.602	109.738	238.811	235.128	228.001	202.063	218.462	202.066	218.734	207.24	210.301	186.674
DeltaAnglefroPreviousFrame	SS33918	20xUAS-CsChrimson-mVenus-attP18	10sLED	AirLED	Arena2	Cam1	20190810T123250	6	101.465	124.041	112.211	118.96	123.872	114.73	114.447	120.577	131.536	129.929	136.648	131.173	122.87	113.886	114.173	111.662	128.056	107.74	120.121	114.991	116.059	126.7	119.12	122.96	124.308	120.155	129.026	114.952	111.426	122.293	203.774	206.024	179.969	158.851	163.448	160.625	166.018	164.737	174.684	170.512	143.532
DeltaAnglefroPreviousFrame	SS33918	20xUAS-CsChrimson-mVenus-attP18	10sLED	AirLED	Arena2	Cam1	20190810T124603	6	97.3429	94.9323	88.2241	90.4203	96.6192	89.6467	99.3887	98.5493	88.5156	92.213	77.7807	73.5915	83.1066	90.4133	88.3992	83.246	84.3041	81.4444	93.8011	81.6019	73.8784	90.5892	87.5384	89.6106	82.2418	83.703	83.2612	81.292	72.5905	77.4615	128.132	136.312	132.633	125.5	134.962	136.525	129.707	130.196	133.182	134.681	127.072
DeltaAnglefroPreviousFrame	SS33918	20xUAS-CsChrimson-mVenus-attP18	10sLED	AirLED	Arena2	Cam1	20191216T224610	6	108.425	114.16	126.218	102.828	113.48	128.698	130.434	133.992	113.366	115.474	130.623	119.825	112.324	116.421	124.183	118.465	130.458	140.981	124.834	135.437	112.929	134.769	116.258	117.289	130.189	110.512	99.7604	130.85	111.353	120.184	211.696	201.985	193.77	199.286	195.314	207.117	191.957	166.013	210.53	171.36	176.002
DeltaAnglefroPreviousFrame	SS33918	20xUAS-CsChrimson-mVenus-attP18	10sLED	AirLED	Arena2	Cam1	20200225T105250	6	104.074	116.998	118.49	118.311	118.344	118.922	97.5005	120.621	122.864	125.078	103.641	119.463	121.932	127.927	120.706	124.711	125.679	110.843	109.987	111.294	116.005	115.35	120.217	119.122	114.486	113.961	105.915	111.117	113.512	109.943	179.635	222.404	195.905	211.998	186.475	193.912	178.171	174.417	170.927	180.689	158.101
DeltaAnglefroPreviousFrame	SS33918	20xUAS-CsChrimson-mVenus-attP18	10sLED	AirLED	Arena2	Cam1	20200227T004515	6	109.563	94.6133	95.9403	95.3884	86.264	97.225	92.7741	88.0251	89.7392	95.4799	113.244	104.528	108.779	107.519	100.369	122.007	110.829	112.389	105.359	101.338	106.79	123.337	113.414	101.565	101.481	90.6601	99.3338	111.09	106.906	105.323	205.902	205.405	182.908	149.861	174.044	172.081	177.4	159.334	162.6	191.373	161.163
DeltaAnglefroPreviousFrame	SS33918	20xUAS-CsChrimson-mVenus-attP18	10sLED	AirLED	olfactoryArena1	Cam0	20191216T225003	6	93.986	108.331	144.445	113.562	94.128	124.282	113.397	97.094	123.787	128.942	151.176	123.735	126.226	124.801	118.71	107.572	130.07	127.394	121.744	124.29	161.592	132.487	139.036	156.512	146.694	118.237	172.227	168.528	138.223	147.299	139.053	269.671	266.5	175.024	188.305	214.399	183.786	191.81	183.337	177.138	149.561
DeltaAnglefroPreviousFrame	SS33918	20xUAS-CsChrimson-mVenus-attP18	10sLED	AirLED	olfactoryArena1	Cam0	20200225T105606	6	69.3362	83.8087	69.6219	93.1344	89.2058	87.9494	77.7768	75.4974	91.4636	81.8564	72.56	82.5636	79.2966	72.4295	87.8599	76.6745	75.9682	85.4059	81.5922	80.2805	93.1321	85.7067	80.6719	85.6906	80.606	75.3128	78.2392	75.6876	83.6147	76.0209	69.7041	162.124	204.731	177.5	153.706	161.393	142.177	134.704	126.026	120.487	119.133
DeltaAnglefroPreviousFrame	SS33918	20xUAS-CsChrimson-mVenus-attP18	10sLED	AirLED	olfactoryArena1	Cam0	20200227T003353	6	93.3556	98.8111	104.365	128.122	115.084	103.246	117.015	120.852	96.0284	114.767	111.264	104.02	109.449	99.0288	116.708	116.982	106.191	115.144	111.006	105.168	121.991	110.633	101.524	91.1003	110.159	97.6874	99.524	105.016	103.205	105.289	108.304	259.246	247.487	217.975	206.115	188.752	175.574	172.309	163.269	170.089	178.377
DeltaAnglefroPreviousFrame	SS33918	20xUAS-CsChrimson-mVenus-attP18	10sLED	AirLED	olfactoryArena1	Cam1	20191216T225003	6	82.9095	89.3767	83.8742	86.0911	96.1694	95.2899	95.7594	106.846	91.586	109.978	105.989	100.948	95.6495	106.508	111.992	98.1369	100.095	96.2284	107.004	97.827	93.3718	92.1	101.588	96.8101	102.009	89.8907	80.6823	96.1381	106.996	108.829	198.871	195.013	183.714	155.984	163.342	157.683	147.212	141.765	167.439	152.275	137.403
DeltaAnglefroPreviousFrame	SS33918	20xUAS-CsChrimson-mVenus-attP18	10sLED	AirLED	olfactoryArena1	Cam1	20200225T105606	6	61.0429	65.1456	64.1265	66.6037	70.8466	65.3969	59.79	62.6852	66.6344	73.4786	74.4399	73.0484	72.056	61.4944	67.1028	77.1451	72.0357	75.265	70.0744	81.2283	64.8312	82.3118	88.6872	85.2304	93.251	79.4231	79.3476	72.7232	81.4969	72.2379	176.201	178.18	160.934	138.449	143.893	152.975	166.013	136.463	130.507	117.14	109.052
DeltaAnglefroPreviousFrame	SS33918	20xUAS-CsChrimson-mVenus-attP18	10sLED	AirLED	olfactoryArena1	Cam1	20200227T003353	6	100.587	115.724	106.855	116.451	121.262	104.592	111.356	105.71	106.25	117.57	106.385	108.278	111.071	99.0534	104.42	117.158	100.323	106.399	94.0413	90.8042	111.758	108.275	94.5445	96.5858	104.746	95.7898	89.3428	106.907	103.42	106.369	252.408	261.926	211.372	180.027	185.2	159.661	165.931	160.142	177.62	159.864	156.779
WalkingDistanceFromPreviousFrame	SS33918	20xUAS-CsChrimson-mVenus-attP18	10sLED	AirLED	Arena2	Cam0	20190810T123250	6	1.92122	2.10669	2.0182	2.2464	2.16846	1.94757	2.02266	2.08546	1.78166	1.83915	1.92086	1.67527	1.67678	1.88825	2.14996	2.23109	1.8445	2.10554	1.88243	1.92855	2.15081	2.30603	2.06429	2.07317	1.83589	1.97126	1.88805	1.80355	1.74085	1.77964	1.84066	1.89637	1.9143	2.52995	2.74072	2.70015	2.60117	2.3534	2.46576	2.38579	2.32092
WalkingDistanceFromPreviousFrame	SS33918	20xUAS-CsChrimson-mVenus-attP18	10sLED	AirLED	Arena2	Cam0	20190810T124603	6	1.21391	1.45007	1.45948	1.31145	1.19771	1.20235	1.33371	1.42567	1.52648	1.36108	1.47673	1.55098	1.45762	1.67795	1.3726	1.36299	1.33453	1.30358	1.31981	1.4583	1.55237	1.22473	1.21597	1.30133	1.30905	1.1888	1.1364	1.25248	1.45404	1.46769	1.42566	1.5058	2.1567	2.87331	3.00527	2.55776	2.44588	2.13654	2.1123	2.01284	1.92616
WalkingDistanceFromPreviousFrame	SS33918	20xUAS-CsChrimson-mVenus-attP18	10sLED	AirLED	Arena2	Cam0	20191216T224610	6	1.95441	2.41848	2.2951	2.45185	2.31159	2.11262	2.31279	2.0202	2.27464	2.28906	2.29361	2.19643	2.2749	2.0765	2.05853	2.48839	2.57973	2.47108	2.49316	2.52112	2.31636	2.4161	2.68385	2.65364	2.37088	2.34847	2.24418	2.22455	2.13084	2.16351	2.39601	2.66231	3.09334	3.17313	3.13005	3.10106	2.66098	2.80064	2.55635	2.53598	2.52456
WalkingDistanceFromPreviousFrame	SS33918	20xUAS-CsChrimson-mVenus-attP18	10sLED	AirLED	Arena2	Cam0	20200225T105250	6	1.68279	1.87168	1.88996	1.86007	1.78677	1.80338	1.82558	1.95947	1.80137	1.66505	1.81849	1.84474	1.83266	1.82159	1.75023	1.85522	1.63978	1.67976	1.57842	1.71312	1.74013	1.75265	1.69579	1.75071	1.60546	1.74999	1.86699	1.66048	1.7011	1.75267	1.80243	1.98212	1.72118	2.00897	1.99505	2.10556	1.91132	1.76477	1.76077	1.75909	1.61206
WalkingDistanceFromPreviousFrame	SS33918	20xUAS-CsChrimson-mVenus-attP18	10sLED	AirLED	Arena2	Cam0	20200227T004515	6	1.40984	1.5414	1.57965	1.56452	1.38195	1.52309	1.43705	1.39123	1.67232	1.52782	1.50823	1.53757	1.4705	1.63492	1.53498	1.53487	1.5225	1.53052	1.54366	1.64566	1.61934	1.63453	1.70249	1.53475	1.6568	1.57322	1.65038	1.6034	1.64496	1.62114	1.56931	2.27021	2.67139	2.97733	2.88655	2.48964	2.16054	2.11529	2.20366	2.09314	2.0808
WalkingDistanceFromPreviousFrame	SS33918	20xUAS-CsChrimson-mVenus-attP18	10sLED	AirLED	Arena2	Cam1	20190810T123250	6	2.10086	2.46527	2.36623	2.31082	2.16848	2.15596	2.22707	2.2012	2.2328	2.50664	2.27565	2.49463	2.32468	2.10139	2.22473	2.37203	2.07951	2.12196	2.22932	2.36943	2.40007	2.17332	2.28814	2.45086	2.47833	2.34579	2.35845	2.241	2.19922	2.14454	2.79566	3.39024	3.79754	3.59294	3.15279	2.8106	2.71891	2.49689	2.4184	2.72711	2.33063
WalkingDistanceFromPreviousFrame	SS33918	20xUAS-CsChrimson-mVenus-attP18	10sLED	AirLED	Arena2	Cam1	20190810T124603	6	1.7254	2.0658	2.05594	1.98876	1.88601	1.86066	1.85612	1.85312	1.90595	2.13626	2.00832	2.15715	2.0033	1.97007	2.14589	2.15857	2.27687	2.01207	1.90248	1.8506	1.7424	1.76145	1.83083	2.05273	2.0508	2.05215	2.118	2.07463	2.02781	1.98326	2.29234	2.6854	3.0691	2.82939	2.5702	2.57117	2.35786	2.15012	2.00305	2.0022	2.00623
WalkingDistanceFromPreviousFrame	SS33918	20xUAS-CsChrimson-mVenus-attP18	10sLED	AirLED	Arena2	Cam1	20191216T224610	6	2.00153	2.26541	2.13249	2.0916	2.16299	2.27233	2.12675	2.07083	1.86777	1.93852	1.92584	1.81215	1.74197	1.80503	2.04807	2.19618	2.14377	2.06694	2.25022	2.12762	2.05953	2.13649	2.09912	2.21092	1.95483	2.16837	1.97125	2.01152	2.08402	2.19919	2.50562	2.42444	3.47108	3.78434	3.40073	3.03438	2.90259	2.70228	2.62907	2.28733	2.47619
WalkingDistanceFromPreviousFrame	SS33918	20xUAS-CsChrimson-mVenus-attP18	10sLED	AirLED	Arena2	Cam1	20200225T105250	6	2.12171	2.23681	2.53908	2.45274	2.52421	2.55538	2.34717	2.40425	2.15121	2.38713	2.31551	2.21763	2.2933	2.27548	2.43657	2.31506	2.16125	2.13727	2.18293	2.28089	2.1166	2.06464	2.33436	2.28247	2.02443	2.18393	2.14839	2.15849	2.05875	1.9393	2.21873	1.91253	2.25259	2.56059	2.40424	2.27792	2.27969	2.18292	2.06338	2.33994	2.19389
WalkingDistanceFromPreviousFrame	SS33918	20xUAS-CsChrimson-mVenus-attP18	10sLED	AirLED	Arena2	Cam1	20200227T004515	6	1.22291	1.41729	1.24148	1.37981	1.41776	1.38874	1.44479	1.42045	1.21748	1.51166	1.43078	1.37351	1.68842	1.4192	1.44368	1.38163	1.20881	1.36078	1.58121	1.52204	1.56107	1.42157	1.2716	1.3049	1.44358	1.3472	1.60294	1.47533	1.52219	1.53982	2.30516	2.82948	2.99845	2.88374	2.55875	2.41285	2.26571	2.48502	2.28692	1.92744	2.23769
WalkingDistanceFromPreviousFrame	SS33918	20xUAS-CsChrimson-mVenus-attP18	10sLED	AirLED	olfactoryArena1	Cam0	20191216T225003	6	2.26385	2.39917	2.83136	2.66103	2.56072	2.57772	2.95371	3.52842	3.16064	3.2556	2.94317	2.73692	2.59315	2.93212	2.88715	2.79715	3.1693	2.63063	2.24261	2.60642	2.96502	3.15764	2.74408	2.69897	2.41881	2.1361	2.41625	3.15544	3.07059	2.52	3.21529	3.39402	3.27008	4.39279	4.30615	4.19258	3.4596	3.13209	3.00074	3.04117	2.98567
WalkingDistanceFromPreviousFrame	SS33918	20xUAS-CsChrimson-mVenus-attP18	10sLED	AirLED	olfactoryArena1	Cam0	20200225T105606	6	1.98627	2.06157	1.94836	2.08974	1.90287	2.18554	1.8219	1.94475	2.06871	1.82228	1.74444	1.81906	1.62636	1.62629	1.57723	1.73319	1.76658	1.64027	1.69577	1.84342	1.90081	1.78161	1.72601	1.82889	1.83921	1.8479	1.71269	1.8271	1.70102	1.65933	1.63657	2.19459	1.85025	2.30337	2.36237	2.20928	2.01959	1.80587	1.64305	1.69033	1.77486
WalkingDistanceFromPreviousFrame	SS33918	20xUAS-CsChrimson-mVenus-attP18	10sLED	AirLED	olfactoryArena1	Cam0	20200227T003353	6	1.29213	1.35691	1.36627	1.56594	1.55884	1.40244	1.55669	1.59498	1.47977	1.47896	1.49916	1.3696	1.40243	1.59535	1.57977	1.72325	1.52624	1.51051	1.53192	1.67262	1.734	1.61677	1.44009	1.49361	1.55844	1.48812	1.39727	1.57134	1.6813	1.44176	1.41167	2.31102	2.39495	2.96568	3.06277	2.85327	2.54069	2.35705	2.24079	2.30396	1.87364
WalkingDistanceFromPreviousFrame	SS33918	20xUAS-CsChrimson-mVenus-attP18	10sLED	AirLED	olfactoryArena1	Cam1	20191216T225003	6	1.45102	1.60561	1.50503	1.61196	1.70359	1.85452	1.6921	1.70355	1.80885	1.99141	1.89906	1.82117	2.06711	1.86544	1.73933	1.86218	2.04144	1.91433	1.95133	1.74793	1.88279	1.6581	1.66275	1.66206	1.53971	1.74305	1.7572	1.87263	1.75313	1.59706	2.22223	2.60053	3.12007	3.26144	3.28131	2.8653	2.36877	2.16707	2.00039	2.07608	1.93156
WalkingDistanceFromPreviousFrame	SS33918	20xUAS-CsChrimson-mVenus-attP18	10sLED	AirLED	olfactoryArena1	Cam1	20200225T105606	6	1.73116	1.77354	1.68292	1.79738	1.77778	1.85816	1.8651	1.78784	1.86244	1.59826	1.6333	1.75085	1.97731	1.86216	1.76483	1.80168	1.75418	1.6994	1.49394	1.6191	1.53972	1.74055	1.99843	1.85788	1.92428	1.93061	1.79454	1.77412	1.85587	1.71668	2.16489	1.53327	2.00975	2.04742	2.21821	2.11311	2.09948	1.86569	1.88187	1.78781	1.6724
WalkingDistanceFromPreviousFrame	SS33918	20xUAS-CsChrimson-mVenus-attP18	10sLED	AirLED	olfactoryArena1	Cam1	20200227T003353	6	1.59479	1.86105	1.91465	1.8021	1.85277	1.80623	1.73476	1.85668	1.83381	1.80236	1.73574	1.77371	1.85491	1.86731	1.67903	1.6955	1.95119	1.70683	1.63028	1.66295	1.84539	1.97173	1.84745	1.80029	1.77292	1.84172	1.75121	1.76525	1.95839	2.0256	2.68351	2.82442	3.17131	2.96514	2.65361	2.44349	2.14509	2.10273	2.20713	1.90442	1.8912
revisit-10mmOut3mmIn-15s	SS33918	20xUAS-CsChrimson-mVenus-attP18	10sLED	AirLED	Arena2	Cam0	20190810T123250	6	0.122698	0.131944	0.114352	0.125926	0.114815	0.105491	0.0928241	0.113426	0.109722	0.104167	0.134259	0.137963	0.162037	0.160685	0.169444	0.16713	0.155451	0.185088	0.209259	0.21713	0.237764	0.246759	0.24213	0.216412	0.278935	0.277315	0.3125	0.320461	0.300926	0.280556	0.287731	0.288889	0.308462	0.301347	0.290741	0.329398	0.359821	0.390512	0.400541	0.381713	0.369689
revisit-10mmOut3mmIn-15s	SS33918	20xUAS-CsChrimson-mVenus-attP18	10sLED	AirLED	Arena2	Cam0	20190810T124603	6	0.0890404	0.0944444	0.0814815	0.0777778	0.0740741	0.0611111	0.0722222	0.1	0.118519	0.124074	0.142593	0.151852	0.142593	0.155556	0.166667	0.157407	0.131481	0.129838	0.12062	0.131481	0.115023	0.146296	0.159259	0.159259	0.148148	0.153704	0.177778	0.190741	0.211111	0.24511	0.224074	0.233333	0.225094	0.233333	0.27037	0.253704	0.218935	0.2	0.22037	0.267088	0.281944
revisit-10mmOut3mmIn-15s	SS33918	20xUAS-CsChrimson-mVenus-attP18	10sLED	AirLED	Arena2	Cam0	20191216T224610	6	0.15845	0.191157	0.148148	0.151852	0.148148	0.135185	0.12963	0.140741	0.15	0.155556	0.138889	0.127778	0.12963	0.135185	0.122222	0.116958	0.125926	0.140741	0.168519	0.211111	0.192593	0.187037	0.18918	0.183333	0.196296	0.238889	0.307407	0.287037	0.301852	0.333333	0.315362	0.313462	0.314815	0.326134	0.352455	0.390741	0.429949	0.485185	0.487037	0.485185	0.494444
revisit-10mmOut3mmIn-15s	SS33918	20xUAS-CsChrimson-mVenus-attP18	10sLED	AirLED	Arena2	Cam0	20200225T105250	6	0.0938705	0.0908333	0.0867508	0.106667	0.118333	0.121667	0.1175	0.1075	0.0916667	0.0833333	0.0834095	0.0616919	0.0258333	0.0341667	0.0558333	0.05	0.0766667	0.0716667	0.0558333	0.0491667	0.0858333	0.1275	0.13	0.104167	0.12	0.163333	0.163333	0.1675	0.19	0.19	0.163333	0.157684	0.1625	0.189167	0.205	0.219518	0.187837	0.1875	0.205142	0.228333	0.254167
revisit-10mmOut3mmIn-15s	SS33918	20xUAS-CsChrimson-mVenus-attP18	10sLED	AirLED	Arena2	Cam0	20200227T004515	6	0.132917	0.135941	0.151305	0.146335	0.133658	0.12135	0.136141	0.145156	0.188892	0.17585	0.159792	0.163792	0.16423	0.170158	0.195935	0.203658	0.192747	0.177053	0.184479	0.18282	0.178363	0.161097	0.151966	0.158161	0.144958	0.161	0.170728	0.165621	0.189577	0.216621	0.225032	0.24553	0.281476	0.266369	0.288743	0.321769	0.327417	0.320793	0.322858	0.32262	0.321117
revisit-10mmOut3mmIn-15s	SS33918	20xUAS-CsChrimson-mVenus-attP18	10sLED	AirLED	Arena2	Cam1	20190810T123250	6	0.178605	0.12937	0.138194	0.130691	0.144653	0.164236	0.172701	0.179514	0.175486	0.171181	0.151618	0.167431	0.153194	0.178164	0.174705	0.170404	0.190064	0.194424	0.184876	0.20076	0.177431	0.171017	0.16877	0.171232	0.176995	0.178197	0.213645	0.181225	0.202902	0.22833	0.241529	0.26528	0.323958	0.360417	0.342047	0.336403	0.371875	0.390953	0.405869	0.355417	0.356385
revisit-10mmOut3mmIn-15s	SS33918	20xUAS-CsChrimson-mVenus-attP18	10sLED	AirLED	Arena2	Cam1	20190810T124603	6	0.121167	0.1125	0.0979167	0.104167	0.123153	0.117144	0.134375	0.148048	0.134375	0.110417	0.11875	0.105405	0.103125	0.108333	0.115625	0.13125	0.151042	0.154167	0.168313	0.176042	0.181086	0.18875	0.179441	0.176528	0.180486	0.18123	0.173506	0.157514	0.163542	0.19375	0.214806	0.211458	0.253125	0.242898	0.229167	0.2731	0.301798	0.311458	0.319903	0.247313	0.216313
revisit-10mmOut3mmIn-15s	SS33918	20xUAS-CsChrimson-mVenus-attP18	10sLED	AirLED	Arena2	Cam1	20191216T224610	6	0.232992	0.245311	0.265713	0.26227	0.227619	0.195582	0.202407	0.235348	0.215438	0.181653	0.199554	0.192112	0.209629	0.195929	0.204067	0.175939	0.175029	0.198529	0.189531	0.183944	0.157363	0.142422	0.126538	0.162414	0.162125	0.147604	0.163351	0.149603	0.166452	0.170818	0.204218	0.225918	0.186103	0.203296	0.23989	0.304664	0.281071	0.23668	0.270055	0.312456	0.366502
revisit-10mmOut3mmIn-15s	SS33918	20xUAS-CsChrimson-mVenus-attP18	10sLED	AirLED	Arena2	Cam1	20200225T105250	6	0.1475	0.140617	0.146509	0.153749	0.130251	0.134933	0.134346	0.133248	0.127523	0.113886	0.154795	0.142538	0.136763	0.150523	0.142486	0.134937	0.119775	0.115741	0.130047	0.141714	0.153206	0.17808	0.173961	0.208344	0.245727	0.22248	0.21162	0.198457	0.185285	0.196704	0.217941	0.246661	0.254495	0.254403	0.265485	0.273581	0.262345	0.26048	0.233811	0.22605	0.253484
revisit-10mmOut3mmIn-15s	SS33918	20xUAS-CsChrimson-mVenus-attP18	10sLED	AirLED	Arena2	Cam1	20200227T004515	6	0.101187	0.136919	0.15	0.121468	0.107576	0.125758	0.173893	0.221212	0.2	0.173299	0.1724	0.187879	0.201684	0.250424	0.24697	0.281629	0.3	0.279673	0.284053	0.24773	0.235089	0.202134	0.23642	0.23142	0.208167	0.203563	0.218009	0.208705	0.245824	0.245069	0.295422	0.287688	0.325794	0.362873	0.33503	0.348575	0.365314	0.379896	0.384717	0.342588	0.344673
revisit-10mmOut3mmIn-15s	SS33918	20xUAS-CsChrimson-mVenus-attP18	10sLED	AirLED	olfactoryArena1	Cam0	20191216T225003	6	0.228725	0.231587	0.278054	0.203307	0.210317	0.219048	0.211228	0.225342	0.228968	0.213953	0.257527	0.306297	0.264261	0.31839	0.330159	0.356096	0.274041	0.232162	0.246894	0.238963	0.308571	0.266391	0.297131	0.323553	0.32708	0.329058	0.277646	0.264809	0.294963	0.259158	0.344629	0.316413	0.305847	0.428006	0.436238	0.482357	0.524523	0.544841	0.497222	0.437126	0.477099
revisit-10mmOut3mmIn-15s	SS33918	20xUAS-CsChrimson-mVenus-attP18	10sLED	AirLED	olfactoryArena1	Cam0	20200225T105606	6	0.0875944	0.100079	0.0832887	0.111508	0.0946429	0.0821429	0.08	0.0578571	0.0713492	0.0904762	0.0826984	0.0825794	0.0887197	0.0969674	0.102901	0.109005	0.0998454	0.105763	0.135952	0.17377	0.178647	0.163135	0.148651	0.14746	0.165067	0.171442	0.174852	0.180564	0.198968	0.192722	0.217506	0.221224	0.234697	0.225929	0.26803	0.268741	0.258864	0.209453	0.176159	0.21631	0.205674
revisit-10mmOut3mmIn-15s	SS33918	20xUAS-CsChrimson-mVenus-attP18	10sLED	AirLED	olfactoryArena1	Cam0	20200227T003353	6	0.147042	0.122549	0.118742	0.116449	0.144118	0.146967	0.124155	0.122962	0.120153	0.125312	0.120643	0.126045	0.146078	0.123303	0.109259	0.105117	0.123823	0.130664	0.143301	0.125515	0.131886	0.146732	0.142894	0.142375	0.140501	0.125163	0.117545	0.117303	0.144444	0.153704	0.155864	0.153426	0.164352	0.149604	0.162606	0.169066	0.183039	0.207279	0.240571	0.248203	0.245174
revisit-10mmOut3mmIn-15s	SS33918	20xUAS-CsChrimson-mVenus-attP18	10sLED	AirLED	olfactoryArena1	Cam1	20191216T225003	6	0.148328	0.154259	0.150159	0.102222	0.112222	0.1	0.102222	0.103333	0.1	0.14135	0.148113	0.140313	0.14	0.142222	0.144444	0.134787	0.142438	0.162222	0.192371	0.202371	0.19349	0.236875	0.222386	0.205556	0.206667	0.204444	0.191111	0.218889	0.226957	0.243475	0.26935	0.305	0.322292	0.379444	0.375278	0.367639	0.360694	0.339514	0.34682	0.371003	0.362521
revisit-10mmOut3mmIn-15s	SS33918	20xUAS-CsChrimson-mVenus-attP18	10sLED	AirLED	olfactoryArena1	Cam1	20200225T105606	6	0.0911821	0.0677083	0.0625	0.0729167	0.0875	0.0927083	0.0958333	0.090625	0.0854167	0.0989583	0.101042	0.110417	0.140625	0.142708	0.141667	0.121875	0.129304	0.150481	0.144792	0.144792	0.155208	0.147917	0.156514	0.173958	0.170919	0.157292	0.15625	0.15625	0.170833	0.161458	0.147917	0.171023	0.148958	0.146973	0.176494	0.16875	0.145833	0.194792	0.186458	0.203125	0.211458
revisit-10mmOut3mmIn-15s	SS33918	20xUAS-CsChrimson-mVenus-attP18	10sLED	AirLED	olfactoryArena1	Cam1	20200227T003353	6	0.158073	0.153333	0.154444	0.162222	0.195556	0.161111	0.175556	0.155556	0.145556	0.173333	0.177778	0.171111	0.143333	0.135556	0.128889	0.142222	0.141111	0.146741	0.128889	0.121111	0.148889	0.171111	0.183333	0.182222	0.183579	0.215556	0.216003	0.213333	0.178889	0.195556	0.184683	0.215556	0.26	0.297778	0.300616	0.262222	0.286667	0.29	0.292438	0.304444	0.305556
DeltaDistanceFromCenter	SS01126	20xUAS-CsChrimson-mVenus-attP18	10sLED	AirLED	Arena2	Cam0	20191205T164704	6	0.0235291	0.0247202	0.0287221	0.0292785	0.027058	0.0213118	0.0182543	0.0151015	0.00799643	0.00789258	0.005532	0.00240396	0.00440043	0.00806199	0.00952622	0.00751826	0.00807172	0.00926168	0.0141496	0.00980827	0.0115594	0.00813804	0.0108831	0.0142341	0.011316	0.0077415	0.00400482	0.00221442	0.000579994	0	0.00180533	0.000747187	-0.00927304	-0.0301442	-0.0516037	-0.0608841	-0.0622698	-0.0696335	-0.0784883	-0.0813427	-0.0853556
DeltaDistanceFromCenter	SS01126	20xUAS-CsChrimson-mVenus-attP18	10sLED	AirLED	Arena2	Cam0	20191210T235714	6	-0.0303925	-0.0234339	-0.0216381	-0.025159	-0.029092	-0.0360133	-0.0373758	-0.0395884	-0.0382977	-0.0323333	-0.0266443	-0.0248652	-0.0233106	-0.0189301	-0.0189452	-0.0240472	-0.0290832	-0.0264926	-0.0229784	-0.0191897	-0.0161509	-0.0190346	-0.024017	-0.0276905	-0.0274179	-0.0201581	-0.0145903	-0.0124003	-0.00697649	0	0.00286004	0.00316217	-0.00810428	-0.0270623	-0.0437059	-0.0595367	-0.0769197	-0.0902502	-0.0934158	-0.0919089	-0.0934394
DeltaDistanceFromCenter	SS01126	20xUAS-CsChrimson-mVenus-attP18	10sLED	AirLED	Arena2	Cam1	20191205T164704	6	0.0286413	0.0284853	0.0299919	0.0323355	0.0418185	0.043666	0.0397143	0.0359092	0.0310144	0.0350419	0.043664	0.0380295	0.0386543	0.0351114	0.044013	0.0479898	0.0529571	0.0550094	0.0518326	0.0478967	0.0464353	0.0469012	0.0373542	0.0407535	0.0295733	0.0160005	0.00484794	0.00285661	0.00303553	0	-0.0017968	-0.0162581	-0.0319507	-0.0500919	-0.0474646	-0.0475241	-0.0470959	-0.052028	-0.04701	-0.054453	-0.0615945
DeltaDistanceFromCenter	SS01126	20xUAS-CsChrimson-mVenus-attP18	10sLED	AirLED	Arena2	Cam1	20191210T235714	6	-0.00704879	-0.0059433	-0.000255717	-0.0010475	-0.00234454	-0.00489669	-0.00413825	-0.0105085	-0.00472962	-0.00816974	0.00360422	0.00385678	0.0071678	0.00654261	0.00540253	0.00269398	0.00437753	0.01275	0.0131895	0.0121818	0.00920666	0.0107241	0.0178002	0.0228686	0.026952	0.0235149	0.0202077	0.00325136	-0.00171992	0	0.00491169	0.0073237	-0.00458617	-0.0416394	-0.055373	-0.064005	-0.0718491	-0.0875101	-0.0893979	-0.0930797	-0.101264
DeltaDistanceFromCenter	SS01126	20xUAS-CsChrimson-mVenus-attP18	10sLED	AirLED	olfactoryArena1	Cam0	20191205T164903	6	0.0145237	0.0141804	0.0133846	0.0149802	0.012776	0.0121642	0.0152599	0.0174357	0.0187442	0.0263008	0.0250285	0.0219696	0.0199147	0.0182206	0.019532	0.0209705	0.0228239	0.0192469	0.0124447	0.00987522	0.0102114	0.00594238	0.00100189	-0.00126712	0.00110666	0.00148378	0.00182865	0.00212586	-7.7383e-05	0	-0.00146421	-0.00156953	-0.0144131	-0.0322405	-0.0443333	-0.0531813	-0.0629639	-0.0687018	-0.0697358	-0.0652712	-0.0657097
DeltaDistanceFromCenter	SS01126	20xUAS-CsChrimson-mVenus-attP18	10sLED	AirLED	olfactoryArena1	Cam0	20191205T221126	6	0.0226504	0.0218209	0.0269432	0.0229305	0.0199053	0.0232367	0.0404647	0.0463581	0.0440335	0.0526967	0.0538124	0.0562007	0.0514965	0.0377343	0.0318349	0.0249519	0.0170848	0.0126256	0.0128506	0.0117144	0.0194526	0.0193915	0.0128329	0.0109009	0.0160013	0.0128173	0.00725337	0.000551303	-0.00932867	0	0.00386239	0.00669322	0.019988	0.0381356	0.0294086	0.0182715	0.0137745	0.0217812	0.0277402	0.0332502	0.0399345
DeltaDistanceFromCenter	SS01126	20xUAS-CsChrimson-mVenus-attP18	10sLED	AirLED	olfactoryArena1	Cam1	20191205T164903	6	-0.0219714	-0.0182256	-0.0241822	-0.0181526	-0.0245406	-0.0241094	-0.0243937	-0.0253823	-0.024877	-0.0282914	-0.0309864	-0.0243863	-0.0206983	-0.0158236	-0.0109066	-0.00851562	-0.0017541	-0.00142027	-0.00227185	-0.00260719	-0.00500861	-0.00595382	-0.00315671	-0.00161283	-0.00151427	7.3805e-05	-9.7091e-05	-0.00330276	-0.00117808	0	-0.000318484	-0.00683231	-0.0202722	-0.0340731	-0.0377253	-0.0405516	-0.0438483	-0.043665	-0.0459696	-0.0483992	-0.0523582
DeltaDistanceFromCenter	SS01126	20xUAS-CsChrimson-mVenus-attP18	10sLED	AirLED	olfactoryArena1	Cam1	20191205T221126	6	0.0140219	0.0120675	0.0173174	0.0148443	0.00888629	0.00233658	-0.0028973	-0.00861041	-0.006338	0.000346655	-0.000739127	-0.0022277	-0.00223199	-0.00851704	-0.0103204	-0.0105887	-0.0164489	-0.0112396	-0.0109771	-0.0103431	-0.0137225	-0.015379	-0.021572	-0.0173891	-0.0154717	-0.0150819	-0.0121766	-0.00365251	0.00378691	0	0.00146812	-0.00370428	-0.0152658	-0.0306287	-0.0427047	-0.0500828	-0.0548188	-0.0564247	-0.0592305	-0.0635442	-0.0743057
Cos(Upwind)	SS01126	20xUAS-CsChrimson-mVenus-attP18	10sLED	AirLED	Arena2	Cam0	20191205T164704	6	-0.138906	-0.0546804	-0.0338718	-0.0754114	-0.0782391	-0.0752167	-0.057182	-0.096038	-0.0604151	-0.0500793	-0.0213452	-0.0279643	-0.0107386	-0.02186	-0.0036921	0.00793172	0.0454395	0.0308992	0.0189528	-0.0240448	-0.0269645	-0.0571999	-0.0461944	-0.0423703	-0.0988811	-0.0994169	-0.0737004	-0.0338307	-0.0625175	-0.0632523	-0.0358816	-0.0437195	-0.060604	-0.0638346	-0.0627955	-0.0246477	-0.00894595	-0.0152702	-0.0411503	-0.0345729	-0.0458613
Cos(Upwind)	SS01126	20xUAS-CsChrimson-mVenus-attP18	10sLED	AirLED	Arena2	Cam0	20191210T235714	6	-0.137269	-0.0820953	-0.13895	-0.116943	-0.082883	-0.0833185	-0.0863799	-0.0760324	-0.0793922	-0.0275178	0.00271567	0.00959881	-0.0371088	-0.0145119	-0.0504323	-0.082971	-0.0950243	-0.0965642	-0.0389215	0.00291657	-0.0121398	-0.0149263	-0.0427368	-0.0441277	-0.0223327	-0.022007	-0.00880772	-0.00207522	0.0408839	0.0598424	0.0580502	0.061193	-0.0191437	-0.0701865	-0.101484	-0.136337	-0.144188	-0.0821076	-0.0286728	-0.0335102	-0.0702481
Cos(Upwind)	SS01126	20xUAS-CsChrimson-mVenus-attP18	10sLED	AirLED	Arena2	Cam1	20191205T164704	6	-0.0970373	-0.141213	-0.144421	-0.11741	-0.0898162	-0.141241	-0.123165	-0.145401	-0.181877	-0.142452	-0.10044	-0.10553	-0.124247	-0.141063	-0.125462	-0.111808	-0.0506332	-0.099455	-0.170763	-0.164466	-0.139847	-0.149355	-0.177546	-0.159224	-0.213431	-0.262021	-0.256293	-0.223121	-0.171351	-0.149422	-0.107239	-0.136204	-0.0948375	-0.10945	-0.092259	-0.0540427	-0.117559	-0.130806	-0.101947	-0.180776	-0.150375
Cos(Upwind)	SS01126	20xUAS-CsChrimson-mVenus-attP18	10sLED	AirLED	Arena2	Cam1	20191210T235714	6	-0.0669313	-0.0532978	-0.0533574	-0.0680909	-0.0271044	-0.0692048	-0.155324	-0.1343	-0.039188	-0.04409	-0.028595	-0.0560665	-0.0745188	-0.0667871	-0.0548084	-0.047228	-0.0118839	0.0318328	0.0103685	-0.0271042	-0.0517105	-0.00336713	0.0147084	-0.0407057	-0.0361673	-0.0803756	-0.152393	-0.152242	-0.0838181	-0.0365655	-0.0488219	-0.0650703	-0.0905395	-0.197545	-0.140355	-0.102398	-0.139041	-0.14992	-0.151505	-0.161732	-0.172016
Cos(Upwind)	SS01126	20xUAS-CsChrimson-mVenus-attP18	10sLED	AirLED	olfactoryArena1	Cam0	20191205T164903	6	-0.0743282	-0.160936	-0.163751	-0.138055	-0.147345	-0.188373	-0.193497	-0.182565	-0.197864	-0.161985	-0.17271	-0.199046	-0.219385	-0.220388	-0.205276	-0.163958	-0.176594	-0.145274	-0.163756	-0.152011	-0.141854	-0.190289	-0.192211	-0.141279	-0.14343	-0.130419	-0.105673	-0.141014	-0.185419	-0.216776	-0.19115	-0.197124	-0.205102	-0.122169	-0.0762965	-0.0683226	-0.089806	-0.0806938	-0.112062	-0.040424	-0.0736927
Cos(Upwind)	SS01126	20xUAS-CsChrimson-mVenus-attP18	10sLED	AirLED	olfactoryArena1	Cam0	20191205T221126	6	-0.226	-0.20713	-0.190109	-0.20024	-0.152673	-0.107348	-0.0765314	-0.111995	-0.0988312	-0.0787436	-0.132594	-0.196266	-0.271258	-0.24752	-0.258741	-0.288007	-0.21486	-0.246845	-0.277281	-0.225128	-0.165654	-0.191673	-0.197392	-0.210219	-0.196076	-0.23502	-0.190362	-0.269159	-0.259663	-0.237576	-0.231863	-0.215642	0.000780932	0.0154717	-0.146446	-0.121369	-0.0154315	0.0133834	-0.0404446	-0.095295	-0.176467
Cos(Upwind)	SS01126	20xUAS-CsChrimson-mVenus-attP18	10sLED	AirLED	olfactoryArena1	Cam1	20191205T164903	6	-0.25854	-0.0929258	-0.0987233	-0.125722	-0.115581	-0.0716416	-0.0648436	-0.0497684	-0.074046	-0.124572	-0.115723	-0.0653713	-0.0340548	0.0149629	0.0335247	-0.00102011	0.0224488	-0.01324	-0.0418538	-0.0974838	-0.110727	-0.0608568	-0.0385213	-0.035833	-0.0464091	-0.0235944	-0.122692	-0.146401	-0.117024	-0.169881	-0.122763	-0.138264	-0.100646	-0.0824892	-0.012593	-0.0149907	-0.0366734	-0.120934	-0.12166	-0.0604703	-0.0730855
Cos(Upwind)	SS01126	20xUAS-CsChrimson-mVenus-attP18	10sLED	AirLED	olfactoryArena1	Cam1	20191205T221126	6	-0.289662	-0.155055	-0.138192	-0.167287	-0.188545	-0.202846	-0.15605	-0.164856	-0.181468	-0.137438	-0.139902	-0.117027	-0.0829506	-0.0764559	-0.118106	-0.136516	-0.0962946	-0.0865384	-0.114621	-0.139382	-0.163799	-0.146355	-0.136011	-0.0986746	-0.101082	-0.0911079	-0.0768364	-0.0244968	-0.0164627	-0.0341956	-0.0695473	-0.110597	-0.171778	-0.130722	-0.127244	-0.10591	-0.137883	-0.0879274	-0.0614195	-0.076592	-0.11914
DeltaAnglefroPreviousFrame	SS01126	20xUAS-CsChrimson-mVenus-attP18	10sLED	AirLED	Arena2	Cam0	20191205T164704	6	115.199	112.59	108.127	127.024	117.796	110.605	113.418	119.593	108.168	104.461	114.722	112.313	115.096	113.754	114.648	118.309	116.601	108.945	112.108	112.168	115.723	114.126	119.281	111.888	118.033	117.023	116.102	110.907	117.213	119.482	116.138	203.833	190.584	192.351	177.08	139.971	139.873	119.145	122.874	120.761	119.799
DeltaAnglefroPreviousFrame	SS01126	20xUAS-CsChrimson-mVenus-attP18	10sLED	AirLED	Arena2	Cam0	20191210T235714	6	112.557	116.487	113.031	105.275	113.889	111.67	102.999	103.678	109.288	103.189	100.38	104.14	108.55	110.035	113.363	113.833	121.527	109.601	107.66	108.895	113.822	112.406	114.288	107.799	123.049	101.108	101.389	103.717	107.247	108.427	109.933	217.362	174.597	173.524	128.6	129.855	143.118	120.765	108.138	113.289	106.841
DeltaAnglefroPreviousFrame	SS01126	20xUAS-CsChrimson-mVenus-attP18	10sLED	AirLED	Arena2	Cam1	20191205T164704	6	104.235	111.384	99.9803	107.595	104.275	120.322	112.847	106.113	119.249	101.381	129.085	122.682	114.616	111.893	127.736	131.971	119.435	116.082	123.747	103.625	125.016	136.537	130.359	107.997	100.592	102.989	98.2978	96.5906	100.186	97.8763	190.646	180.048	166.867	161.944	137.225	131.026	112.908	99.9251	105.682	105.631	97.4444
DeltaAnglefroPreviousFrame	SS01126	20xUAS-CsChrimson-mVenus-attP18	10sLED	AirLED	Arena2	Cam1	20191210T235714	6	81.667	95.3182	94.3167	102.758	96.0553	91.7508	105.151	105.425	101.169	89.8076	99.3925	108.154	109.492	110.272	91.1459	101.665	112.76	107.138	103.377	104.054	119.036	117.751	116.918	137.209	117.59	122.522	159.89	127.947	122.365	109.555	221.329	216.02	180.351	148.765	142.84	142.726	129.341	113.115	106.576	97.9206	111.793
DeltaAnglefroPreviousFrame	SS01126	20xUAS-CsChrimson-mVenus-attP18	10sLED	AirLED	olfactoryArena1	Cam0	20191205T164903	6	102.138	106.888	92.9446	85.4361	90.0009	87.1457	88.1884	82.4976	91.4353	94.9385	89.0423	90.675	97.5362	100.171	109.554	94.6966	98.0139	93.8973	99.809	99.1885	95.9197	87.6318	93.3497	92.4223	96.1683	83.5998	88.7838	86.9485	82.4892	88.2448	96.8513	181.436	172.244	165.547	147.631	126.871	123.324	107.767	106.829	112.472	116.062
DeltaAnglefroPreviousFrame	SS01126	20xUAS-CsChrimson-mVenus-attP18	10sLED	AirLED	olfactoryArena1	Cam0	20191205T221126	6	99.0607	115.598	110.807	108.143	148.706	116.757	98.1652	114.367	113.461	129.899	108.866	112.379	119.47	118.233	107.427	118.203	124.564	101.295	105.885	107.223	118.418	141.744	121.06	131.334	107.583	129.766	97.7412	105.705	88.1811	101.24	120.82	254.145	237.005	158.987	158.904	172.502	157.685	144.597	140.469	142.302	144.224
DeltaAnglefroPreviousFrame	SS01126	20xUAS-CsChrimson-mVenus-attP18	10sLED	AirLED	olfactoryArena1	Cam1	20191205T164903	6	94.1449	104.875	93.4483	99.6781	107.656	106.72	102.245	102.013	116.987	109.994	93.5101	94.1881	91.5031	94.1094	110.826	105.466	104.019	94.8091	106.931	102.668	103.336	106.687	101.838	89.655	109.639	109.135	98.3725	93.0087	109.537	99.5412	199.45	167.042	166.977	139.055	106.735	122.971	112.882	106.434	119.697	97.076	85.2115
DeltaAnglefroPreviousFrame	SS01126	20xUAS-CsChrimson-mVenus-attP18	10sLED	AirLED	olfactoryArena1	Cam1	20191205T221126	6	111.304	93.5788	91.0913	93.1886	89.0765	90.2931	93.2636	88.6822	91.474	85.7696	92.1469	88.8645	85.9718	96.1318	98.573	86.8991	97.7925	86.2223	90.3223	94.7414	101.94	114.549	107.266	84.8667	86.4739	84.1006	95.7087	83.9454	91.0076	99.9004	163.396	147.391	147.404	119.998	112.761	114.234	105.481	112.717	108.189	103.051	95.1138
WalkingDistanceFromPreviousFrame	SS01126	20xUAS-CsChrimson-mVenus-attP18	10sLED	AirLED	Arena2	Cam0	20191205T164704	6	1.85678	1.91708	1.92013	1.78247	1.88899	1.80637	1.64488	1.94615	1.88365	1.8258	1.59603	1.65959	1.75153	1.83021	1.80356	1.78841	1.65573	1.74547	1.97432	1.83705	1.8356	1.77805	1.85463	1.78429	1.89946	1.7774	1.99725	1.91826	1.90107	1.81641	1.75814	1.97409	2.25233	3.11687	3.13398	2.96094	2.86475	2.77885	2.79945	2.73141	2.54834
WalkingDistanceFromPreviousFrame	SS01126	20xUAS-CsChrimson-mVenus-attP18	10sLED	AirLED	Arena2	Cam0	20191210T235714	6	1.8173	1.89283	2.18463	2.22734	2.16446	2.27587	2.01573	2.08197	2.31609	2.16006	1.99543	2.04295	2.02204	2.07676	2.14555	2.09544	2.03705	1.92212	1.90428	1.88741	2.21788	2.09571	2.18725	2.32764	2.25732	2.23396	2.28224	2.2095	2.19557	2.1415	2.17888	2.45904	2.33448	3.25787	3.26507	3.2473	2.95114	2.60024	2.55216	2.70753	2.75264
WalkingDistanceFromPreviousFrame	SS01126	20xUAS-CsChrimson-mVenus-attP18	10sLED	AirLED	Arena2	Cam1	20191205T164704	6	1.47564	1.55116	1.63173	1.56296	1.79706	1.79435	1.75011	1.66254	1.76167	1.85628	1.98438	2.04165	1.91085	1.89095	2.06263	2.05054	1.73661	1.66206	1.83113	1.85329	1.84228	1.71549	1.83342	1.66209	1.57766	1.70262	1.49384	1.69431	1.64733	1.71434	1.94579	2.32035	2.98387	2.89784	2.88501	2.62481	2.47449	2.26001	2.33811	2.10469	2.10948
WalkingDistanceFromPreviousFrame	SS01126	20xUAS-CsChrimson-mVenus-attP18	10sLED	AirLED	Arena2	Cam1	20191210T235714	6	1.56272	1.81026	1.9412	2.05658	2.04421	1.64573	1.77201	1.80919	1.71654	1.63046	1.93902	2.11142	1.96713	1.65815	1.6718	1.48208	1.62847	1.77377	1.73166	1.68049	1.79821	1.99029	2.00505	1.85721	1.77182	1.70734	1.69396	1.88724	1.93429	2.05281	2.60579	2.60972	3.54249	3.67317	3.12556	2.4547	2.40694	2.68019	2.42228	2.42319	2.27514
WalkingDistanceFromPreviousFrame	SS01126	20xUAS-CsChrimson-mVenus-attP18	10sLED	AirLED	olfactoryArena1	Cam0	20191205T164903	6	1.27589	1.5015	1.33328	1.30137	1.4576	1.26488	1.22354	1.44595	1.27944	1.24071	1.36494	1.30255	1.38261	1.30467	1.55767	1.2651	1.32734	1.3729	1.37625	1.44552	1.54256	1.37027	1.40381	1.43654	1.39276	1.32102	1.20851	1.2404	1.37361	1.30583	1.36222	1.81842	1.98952	2.93031	2.85306	2.58573	2.75369	2.48222	2.13971	2.35487	2.15587
WalkingDistanceFromPreviousFrame	SS01126	20xUAS-CsChrimson-mVenus-attP18	10sLED	AirLED	olfactoryArena1	Cam0	20191205T221126	6	1.74985	1.99036	2.22399	2.23138	2.04593	1.9864	1.94216	2.09092	1.84569	1.99387	1.82601	2.03322	2.12981	1.97092	2.52451	2.58548	2.23577	1.94634	2.02639	2.27152	1.94149	1.95125	2.24441	2.1118	1.79891	1.80024	1.58968	2.0362	2.04051	2.00004	1.84727	2.57499	2.75644	3.30473	3.30435	3.34869	3.0761	3.00349	2.96716	2.68222	2.68472
WalkingDistanceFromPreviousFrame	SS01126	20xUAS-CsChrimson-mVenus-attP18	10sLED	AirLED	olfactoryArena1	Cam1	20191205T164903	6	1.29189	1.42445	1.31079	1.24704	1.45609	1.35969	1.50354	1.42685	1.58031	1.30885	1.39754	1.40899	1.44608	1.41917	1.55873	1.36963	1.57675	1.50104	1.51933	1.41446	1.42877	1.68446	1.44485	1.4964	1.43029	1.66344	1.40884	1.37425	1.32241	1.29261	1.69082	1.56406	2.07122	1.99319	1.80332	1.84396	1.63568	1.5265	1.37353	1.39894	1.36217
WalkingDistanceFromPreviousFrame	SS01126	20xUAS-CsChrimson-mVenus-attP18	10sLED	AirLED	olfactoryArena1	Cam1	20191205T221126	6	1.53876	1.61259	1.39202	1.43374	1.42993	1.53654	1.68107	1.53969	1.39667	1.42151	1.52266	1.40767	1.27152	1.57549	1.58954	1.40958	1.44169	1.44772	1.49859	1.50181	1.52702	1.56378	1.55005	1.35925	1.16859	1.2029	1.30124	1.31739	1.32032	1.36915	1.65594	1.34641	2.21192	2.48589	2.24394	1.93548	2.18723	2.09806	1.98481	1.8228	1.92853
revisit-10mmOut3mmIn-15s	SS01126	20xUAS-CsChrimson-mVenus-attP18	10sLED	AirLED	Arena2	Cam0	20191205T164704	6	0.190966	0.224359	0.239744	0.236648	0.223718	0.225641	0.233974	0.221795	0.208075	0.23166	0.225247	0.222202	0.237821	0.25641	0.23141	0.241616	0.255545	0.259276	0.23612	0.260568	0.262556	0.260198	0.274004	0.293623	0.336853	0.313462	0.303598	0.289566	0.264857	0.224277	0.242702	0.267949	0.236677	0.194872	0.183974	0.166798	0.156527	0.157051	0.157692	0.128205	0.112922
revisit-10mmOut3mmIn-15s	SS01126	20xUAS-CsChrimson-mVenus-attP18	10sLED	AirLED	Arena2	Cam0	20191210T235714	6	0.19905	0.18615	0.211353	0.225453	0.217603	0.219928	0.204318	0.198762	0.211504	0.188164	0.196196	0.196649	0.202989	0.225664	0.209662	0.245803	0.272358	0.252959	0.256582	0.250543	0.240761	0.235828	0.258786	0.279589	0.259011	0.226757	0.21564	0.208424	0.156914	0.142542	0.155667	0.161584	0.164551	0.165089	0.169837	0.176932	0.180522	0.180662	0.163399	0.143599	0.135809
revisit-10mmOut3mmIn-15s	SS01126	20xUAS-CsChrimson-mVenus-attP18	10sLED	AirLED	Arena2	Cam1	20191205T164704	6	0.157133	0.145607	0.149678	0.151047	0.148191	0.144484	0.138068	0.161792	0.178255	0.179662	0.189438	0.175117	0.155391	0.18795	0.18523	0.185424	0.202861	0.220508	0.222948	0.2189	0.24354	0.254348	0.305868	0.315343	0.312751	0.245013	0.238914	0.267561	0.268441	0.257923	0.211247	0.20357	0.191653	0.150935	0.128654	0.106608	0.0786068	0.076256	0.097001	0.0729263	0.0973898
revisit-10mmOut3mmIn-15s	SS01126	20xUAS-CsChrimson-mVenus-attP18	10sLED	AirLED	Arena2	Cam1	20191210T235714	6	0.189922	0.157012	0.117542	0.118917	0.126852	0.126578	0.144372	0.167597	0.17166	0.178931	0.152139	0.180391	0.180123	0.166356	0.134413	0.123852	0.11262	0.147159	0.168149	0.175197	0.191898	0.190154	0.203792	0.209182	0.226412	0.220147	0.208238	0.197513	0.185231	0.160312	0.144072	0.176763	0.200882	0.199345	0.172644	0.148407	0.132254	0.161079	0.147708	0.134207	0.107153
revisit-10mmOut3mmIn-15s	SS01126	20xUAS-CsChrimson-mVenus-attP18	10sLED	AirLED	olfactoryArena1	Cam0	20191205T164903	6	0.146928	0.150537	0.142372	0.139312	0.123927	0.125191	0.11198	0.106823	0.116113	0.117948	0.123907	0.145353	0.156137	0.165212	0.165873	0.168511	0.166554	0.167198	0.182743	0.192323	0.196716	0.180692	0.173201	0.174576	0.192887	0.181333	0.167264	0.138716	0.113381	0.121427	0.130844	0.155461	0.165827	0.16502	0.132763	0.125703	0.121914	0.134101	0.136182	0.124481	0.119505
revisit-10mmOut3mmIn-15s	SS01126	20xUAS-CsChrimson-mVenus-attP18	10sLED	AirLED	olfactoryArena1	Cam0	20191205T221126	6	0.149095	0.114815	0.123148	0.100231	0.0902778	0.161574	0.215236	0.188889	0.201852	0.201852	0.197023	0.196759	0.16713	0.200463	0.222222	0.181481	0.161111	0.19871	0.185872	0.175708	0.208824	0.194444	0.255556	0.283333	0.301852	0.288889	0.285185	0.194444	0.162963	0.205639	0.196296	0.164815	0.116667	0.211111	0.216667	0.218519	0.225926	0.22037	0.177778	0.236405	0.25799
revisit-10mmOut3mmIn-15s	SS01126	20xUAS-CsChrimson-mVenus-attP18	10sLED	AirLED	olfactoryArena1	Cam1	20191205T164903	6	0.131603	0.136929	0.159963	0.172514	0.1486	0.150474	0.17115	0.195485	0.195593	0.213427	0.197059	0.200514	0.213137	0.195408	0.199974	0.201749	0.215507	0.206223	0.200618	0.195548	0.172621	0.171443	0.173438	0.175003	0.190159	0.172877	0.177373	0.165001	0.150029	0.142639	0.146552	0.144737	0.151754	0.142982	0.141377	0.132456	0.140351	0.127193	0.136281	0.149123	0.150877
revisit-10mmOut3mmIn-15s	SS01126	20xUAS-CsChrimson-mVenus-attP18	10sLED	AirLED	olfactoryArena1	Cam1	20191205T221126	6	0.236525	0.255218	0.271965	0.27159	0.269501	0.247623	0.239657	0.229726	0.213341	0.219388	0.209271	0.230909	0.25052	0.270082	0.266292	0.307434	0.311819	0.299811	0.30197	0.285262	0.28736	0.290038	0.278309	0.256867	0.253452	0.24741	0.231139	0.234442	0.248901	0.243811	0.229635	0.202092	0.198414	0.224556	0.228059	0.190769	0.217665	0.226955	0.23728	0.221153	0.200926
DeltaDistanceFromCenter	SS01127	20xUAS-CsChrimson-mVenus-attP18	10sLED	AirLED	olfactoryArena1	Cam1	20191211T000119	6	0.0172767	0.0164221	0.0249154	0.0285893	0.0260366	0.022406	0.0144501	0.0130016	0.00904468	-0.0011292	-0.00940617	-0.0104407	-0.0148665	-0.0176266	-0.00655782	-0.00148921	0.00896647	0.0148355	0.0146464	0.0136752	0.00310793	0.00496666	0.00511399	0.0062403	0.00537167	0.00739562	0.012725	0.0112191	0.00910565	0	0.000274449	-0.00728086	-0.0139023	-0.0187517	-0.0349723	-0.0522933	-0.0618807	-0.063623	-0.065808	-0.0695409	-0.075533
DeltaDistanceFromCenter	SS01127	20xUAS-CsChrimson-mVenus-attP18	10sLED	AirLED	olfactoryArena1	Cam0	20191211T000119	5	-0.0117026	-0.00955703	-0.0151193	-0.0133108	-0.0125106	-0.00985127	-0.0138457	-0.0172522	-0.021518	-0.0238655	-0.0228632	-0.0203681	-0.0177431	-0.0119083	-0.00698358	-0.00585579	-0.00306075	-0.00473305	-0.0134748	-0.0142926	-0.0135216	-0.0131348	-0.0113423	-0.00923988	-0.00153606	0.00821308	0.00887769	0.00820883	0.00417471	0	0.00214731	0.00446548	-0.000803509	-0.0168881	-0.0358307	-0.0447413	-0.0487935	-0.0488861	-0.0458041	-0.0405502	-0.040767
Cos(Upwind)	SS01127	20xUAS-CsChrimson-mVenus-attP18	10sLED	AirLED	olfactoryArena1	Cam1	20191211T000119	6	-0.313703	-0.146039	-0.0874182	-0.0577612	-0.0798776	-0.0782318	-0.0857375	-0.0545896	-0.0253897	-0.0392896	-0.0349488	-0.00397614	-0.0406651	-0.068049	-0.0186793	-0.0232309	-0.0196967	-0.0469159	-0.0560309	-0.0852706	-0.0813379	-0.0951387	-0.0366062	-0.0548112	-0.0665203	-0.0764385	-0.058564	-0.103147	-0.0937484	-0.0996998	-0.0942537	-0.068084	0.0429503	0.0154526	-0.0867484	-0.0870735	-0.0978924	-0.05554	-0.0865163	-0.103327	-0.148169
Cos(Upwind)	SS01127	20xUAS-CsChrimson-mVenus-attP18	10sLED	AirLED	olfactoryArena1	Cam0	20191211T000119	5	0.020823	-0.0842488	-0.100176	-0.104238	-0.158421	-0.186652	-0.18347	-0.199916	-0.212402	-0.177453	-0.149946	-0.179669	-0.171159	-0.114779	-0.0537216	-0.066378	-0.103009	-0.120573	-0.145912	-0.13961	-0.107489	-0.0760045	-0.131063	-0.132708	-0.151603	-0.124666	-0.149001	-0.169137	-0.171138	-0.200208	-0.175013	-0.160132	-0.207863	-0.117517	-0.074538	-0.0494367	-0.000201721	-0.0543813	-0.0422513	-0.0648909	-0.111937
DeltaAnglefroPreviousFrame	SS01127	20xUAS-CsChrimson-mVenus-attP18	10sLED	AirLED	olfactoryArena1	Cam1	20191211T000119	6	91.9178	105.982	97.2184	99.4808	101.862	101.114	89.6785	100.043	88.3619	109.505	95.5986	87.3283	92.9968	122.02	80.0806	98.0341	97.7582	97.2866	85.1793	85.4278	100.503	87.742	75.5496	90.9451	87.3098	95.9837	99.9682	99.3456	93.3087	87.0379	208.383	177.162	147.59	141.072	135.456	115.397	114.103	104.824	83.616	84.9899	86.7766
DeltaAnglefroPreviousFrame	SS01127	20xUAS-CsChrimson-mVenus-attP18	10sLED	AirLED	olfactoryArena1	Cam0	20191211T000119	5	104.97	108.718	102.942	95.2364	110.715	102.038	100.551	100.913	107.926	96.0356	104.646	103.07	104.819	106.968	112.012	100.882	104.08	98.5584	112.562	104.903	100.87	114.24	109.17	105.11	108.166	106.301	98.1794	96.4325	104.884	97.0023	102.98	219.663	236.652	168.06	178.709	148.825	135.679	122.963	109.127	110.774	93.6468
WalkingDistanceFromPreviousFrame	SS01127	20xUAS-CsChrimson-mVenus-attP18	10sLED	AirLED	olfactoryArena1	Cam1	20191211T000119	6	1.16798	1.52285	1.43589	1.43901	1.34345	1.41227	1.35517	1.27367	1.35836	1.55375	1.49109	1.34933	1.49784	1.73367	1.53877	1.7347	1.33799	1.15057	1.2529	1.20653	1.21302	1.29783	1.18977	1.31316	1.29185	1.1915	1.33319	1.32204	1.18116	1.15406	1.79984	2.12979	2.18872	1.77105	1.61252	1.57529	1.38432	1.50719	1.45438	1.36555	1.51511
WalkingDistanceFromPreviousFrame	SS01127	20xUAS-CsChrimson-mVenus-attP18	10sLED	AirLED	olfactoryArena1	Cam0	20191211T000119	5	1.36883	1.47387	1.62896	1.37139	1.47697	1.40716	1.49943	1.41389	1.65281	1.42142	1.45172	1.51726	1.77512	1.69911	1.63342	1.56349	1.50168	1.54162	1.60693	1.54168	1.49271	1.62728	1.41572	1.42675	1.58849	1.58463	1.47894	1.50412	1.47668	1.38732	1.45093	1.80639	2.2907	2.6712	2.66393	2.40605	2.23241	2.10994	1.89287	1.90588	1.89534
revisit-10mmOut3mmIn-15s	SS01127	20xUAS-CsChrimson-mVenus-attP18	10sLED	AirLED	olfactoryArena1	Cam1	20191211T000119	6	0.203339	0.178625	0.13781	0.142466	0.14413	0.161528	0.189797	0.165615	0.145827	0.149622	0.168153	0.146998	0.156064	0.163024	0.151658	0.156266	0.15064	0.162436	0.155705	0.14596	0.114052	0.13681	0.133822	0.140686	0.157919	0.152892	0.183777	0.191176	0.171569	0.160082	0.138661	0.173529	0.179644	0.196427	0.185834	0.184314	0.190196	0.182353	0.175687	0.171569	0.17549
revisit-10mmOut3mmIn-15s	SS01127	20xUAS-CsChrimson-mVenus-attP18	10sLED	AirLED	olfactoryArena1	Cam0	20191211T000119	5	0.148867	0.134843	0.141505	0.127512	0.133299	0.0986932	0.0919462	0.119392	0.120156	0.117073	0.155205	0.15498	0.131976	0.0958498	0.088419	0.10336	0.126833	0.12955	0.143022	0.162066	0.128171	0.143698	0.138493	0.165334	0.195245	0.169822	0.173715	0.157169	0.170605	0.192919	0.174867	0.162847	0.157039	0.157009	0.134929	0.142253	0.183066	0.184386	0.194755	0.181454	0.165954
DeltaDistanceFromCenter	SS01227	20xUAS-CsChrimson-mVenus-attP18	10sLED	AirLED	Arena2	Cam0	20191205T175610	6	0.0630314	0.0666109	0.0640801	0.0600639	0.0547992	0.0507512	0.0459482	0.0449347	0.0438265	0.04114	0.0443855	0.0442885	0.0398285	0.0354886	0.0297358	0.0217997	0.0173228	0.0201188	0.0203062	0.0195321	0.0185648	0.0172808	0.0160493	0.0134314	0.0123029	0.0083025	0.000888017	0.00272552	0.00317851	0	-0.00726406	-0.0158577	-0.022677	-0.0371204	-0.0446486	-0.0508209	-0.0587764	-0.0731088	-0.0842001	-0.088942	-0.08747
DeltaDistanceFromCenter	SS01227	20xUAS-CsChrimson-mVenus-attP18	10sLED	AirLED	Arena2	Cam0	20191205T183446	6	0.0085802	0.0107222	0.0126638	0.0141558	0.0167957	0.019403	0.0243812	0.0270165	0.0278151	0.0311051	0.0311176	0.0330707	0.0379865	0.0381608	0.0369683	0.0340788	0.0274491	0.0238938	0.0251277	0.0239504	0.0192533	0.013404	0.00846347	0.00839305	0.00897052	0.00827345	0.00611552	0.0051057	0.0017436	0	-0.000763723	-0.000628942	-0.00185458	-0.0117644	-0.025585	-0.031729	-0.0342542	-0.0384135	-0.0398526	-0.0374524	-0.0436655
DeltaDistanceFromCenter	SS01227	20xUAS-CsChrimson-mVenus-attP18	10sLED	AirLED	Arena2	Cam1	20191205T175610	6	-0.00115624	0.000433147	0.00097875	0.00230743	0.0025117	0.00292202	0.00632093	0.00733567	0.00884276	0.00911931	0.00613612	0.00781777	0.0106502	0.00911073	0.0104724	0.0105793	0.00946698	0.00900055	0.00884406	0.00854387	0.00818248	0.00645061	0.00378345	0.000645871	-0.000873747	-0.000416133	-0.00117971	-0.000285499	0.00077859	0	1.2001e-05	-0.00167901	-0.00712108	-0.0144388	-0.0207857	-0.0265229	-0.0343579	-0.0371278	-0.0433763	-0.0473869	-0.0475735
DeltaDistanceFromCenter	SS01227	20xUAS-CsChrimson-mVenus-attP18	10sLED	AirLED	Arena2	Cam1	20191205T183446	6	-0.00266817	0.00594537	0.00916482	0.0115309	0.0192641	0.0280998	0.0354783	0.0375204	0.0376907	0.0322315	0.0283428	0.0215412	0.0092606	0.00371187	0.00817412	0.0122067	0.00344516	0.000669845	0.00242267	0.00587113	0.00620624	0.00521303	0.00664665	0.0107536	0.0138386	0.0139485	0.014415	0.00635701	0.00124599	0	0.00257578	0.00308643	-0.00647216	-0.0161467	-0.0268626	-0.0336497	-0.0400875	-0.048175	-0.0623207	-0.0772102	-0.0846595
DeltaDistanceFromCenter	SS01227	20xUAS-CsChrimson-mVenus-attP18	10sLED	AirLED	olfactoryArena1	Cam0	20191205T175809	6	-0.00380789	-0.00185249	-0.000623052	-0.000617855	0.000421491	-0.000895401	-0.00200773	0.00320348	0.00906128	0.010253	0.00833694	0.00839265	0.0103593	0.012894	0.0122516	0.00767709	0.00402413	0.000382225	-0.0029084	-0.000270013	-0.00135735	-0.000989935	-0.00175615	-0.00290688	-0.00731799	-0.00573649	-0.00511431	-0.00527291	-0.0014288	0	0.00539335	0.00886922	0.00873586	-0.00489657	-0.0151904	-0.0251835	-0.0362642	-0.0385963	-0.0372267	-0.0427739	-0.0484201
DeltaDistanceFromCenter	SS01227	20xUAS-CsChrimson-mVenus-attP18	10sLED	AirLED	olfactoryArena1	Cam0	20191211T002423	6	0.0812092	0.0841094	0.0812153	0.0770029	0.0714179	0.0660387	0.0703988	0.0727823	0.06411	0.054976	0.0495395	0.0428613	0.0458688	0.0469609	0.0380763	0.0288843	0.0237242	0.0229218	0.0268145	0.0348775	0.0349403	0.0291236	0.0201992	0.016839	0.0138385	0.0140054	0.00557573	0.00034926	-0.000129399	0	0.00362181	0.0112929	0.0208691	0.0214292	0.0222417	0.021642	0.018816	0.0159748	0.0155168	0.0150505	0.0107248
DeltaDistanceFromCenter	SS01227	20xUAS-CsChrimson-mVenus-attP18	10sLED	AirLED	olfactoryArena1	Cam1	20191205T175809	6	-0.016066	-0.00974155	-0.00387	-0.00378476	-0.005751	-0.00627234	-0.00623658	-0.00531407	-0.00299241	-0.00170436	-0.00242048	-0.00170645	-0.00523929	-0.00487721	-0.00565096	-0.00971652	-0.0127886	-0.016808	-0.0193412	-0.0227677	-0.0227609	-0.0189164	-0.0179984	-0.0140038	-0.00983347	-0.0079242	-0.00807628	-0.00735456	-0.00656931	0	0.00235989	0.00303112	-0.0151518	-0.0234988	-0.0273738	-0.0364072	-0.038642	-0.0368358	-0.0411959	-0.0399992	-0.0377411
DeltaDistanceFromCenter	SS01227	20xUAS-CsChrimson-mVenus-attP18	10sLED	AirLED	olfactoryArena1	Cam1	20191211T002423	6	-0.00526066	-0.00583968	-0.00340678	-9.2874e-05	-0.00525691	-0.00870601	-0.00771829	-0.0036365	-0.00213042	-0.00061711	-0.00342452	0.00125905	0.000511088	-0.000371972	0.00347321	0.00711903	0.00434986	0.00125488	0.00223902	0.00284025	-0.00219239	-0.00241512	-0.00119486	0.000148679	-0.000661698	0.00286126	0.00536641	-0.00020489	-0.00211671	0	0.00338415	0.00807248	0.0109445	0.0138909	0.015651	0.0184214	0.0203871	0.0198264	0.0211583	0.0210942	0.018855
Cos(Upwind)	SS01227	20xUAS-CsChrimson-mVenus-attP18	10sLED	AirLED	Arena2	Cam0	20191205T175610	6	-0.155237	-0.134571	-0.111501	-0.10015	-0.0863065	-0.074973	-0.0698544	-0.0757695	-0.0866821	-0.0942676	-0.0751117	-0.10449	-0.0920484	-0.0628476	-0.0452401	-0.0447902	-0.0399235	-0.0228413	-0.0547544	-0.0876474	-0.0785347	-0.109927	-0.151678	-0.136323	-0.109717	-0.162218	-0.136665	-0.102654	-0.0906902	-0.0795868	-0.0857775	-0.0365958	-0.0186477	-0.0192345	-0.033631	-0.039767	-0.0497967	-0.0837409	-0.0234547	-0.00802785	0.027842
Cos(Upwind)	SS01227	20xUAS-CsChrimson-mVenus-attP18	10sLED	AirLED	Arena2	Cam0	20191205T183446	6	-0.203841	-0.0705509	-0.0248706	-0.0707733	-0.0576226	-0.0709125	-0.0368101	-0.0525363	-0.0452745	-0.0286769	-0.0350221	-0.0614224	-0.0563778	-0.0604805	-0.0951157	-0.0715556	-0.0414122	-0.0173155	-0.0337788	-0.0699563	-0.0923246	-0.0851037	-0.0885485	-0.0981077	-0.0688035	-0.0623386	-0.0772733	-0.0736888	-0.0816582	-0.120255	-0.104323	-0.0428362	0.045076	-0.0131534	0.0146856	0.0306923	0.0483811	-0.0161361	-0.0352899	-0.0552775	-0.108389
Cos(Upwind)	SS01227	20xUAS-CsChrimson-mVenus-attP18	10sLED	AirLED	Arena2	Cam1	20191205T175610	6	0.0108234	-0.0609524	-0.0813454	-0.123059	-0.133987	-0.107744	-0.109522	-0.116006	-0.0939253	-0.12166	-0.16677	-0.176027	-0.167429	-0.0867012	-0.0927277	-0.105519	-0.138473	-0.124715	-0.171292	-0.167092	-0.173276	-0.172578	-0.15214	-0.187342	-0.206915	-0.212454	-0.219874	-0.183351	-0.166821	-0.199361	-0.147526	-0.146616	-0.112741	-0.0818951	-0.0322511	-0.0894543	-0.096017	-0.132613	-0.112495	-0.0593473	-0.0532001
Cos(Upwind)	SS01227	20xUAS-CsChrimson-mVenus-attP18	10sLED	AirLED	Arena2	Cam1	20191205T183446	6	0.0390273	-0.00909342	-0.0211603	-0.0170463	-0.0156033	-0.00474552	-0.0242643	-0.00847075	-0.0321577	-0.0992591	-0.120902	-0.128321	-0.15448	-0.0590507	-0.00196693	-0.0292039	-0.0807396	-0.0539123	-0.0318994	-0.0183208	-0.113328	-0.117977	-0.089664	-0.0717129	-0.0450815	-0.123563	-0.111721	-0.0883654	-0.116787	-0.0815963	-0.0171798	0.00401357	-0.0497005	-0.0687065	-0.137018	-0.125049	-0.0771432	-0.09953	-0.16915	-0.137457	-0.141556
Cos(Upwind)	SS01227	20xUAS-CsChrimson-mVenus-attP18	10sLED	AirLED	olfactoryArena1	Cam0	20191205T175809	6	0.0298217	-0.0848337	-0.108167	-0.1239	-0.150874	-0.152774	-0.156663	-0.130256	-0.138899	-0.159273	-0.183887	-0.186566	-0.166673	-0.167848	-0.162415	-0.166603	-0.197876	-0.222223	-0.213355	-0.182317	-0.189529	-0.172282	-0.150848	-0.170264	-0.188448	-0.169167	-0.143205	-0.164924	-0.170195	-0.153184	-0.14648	-0.0907696	-0.123122	-0.124714	-0.148507	-0.144632	-0.174555	-0.0981976	-0.131614	-0.183064	-0.203207
Cos(Upwind)	SS01227	20xUAS-CsChrimson-mVenus-attP18	10sLED	AirLED	olfactoryArena1	Cam0	20191211T002423	6	-0.0615056	-0.0972707	-0.163035	-0.127368	-0.128827	-0.170051	-0.20557	-0.159301	-0.179539	-0.166436	-0.136077	-0.157545	-0.137707	-0.124076	-0.184937	-0.202489	-0.159306	-0.155941	-0.0974764	-0.0662558	-0.102802	-0.103627	-0.135155	-0.115012	-0.111436	-0.0713931	-0.0717757	-0.0688632	-0.0840174	-0.0747447	-0.0373077	0.021822	0.121502	0.0584673	0.0581107	0.0488188	0.044081	0.00201564	-0.0393882	-0.0611783	-0.064324
Cos(Upwind)	SS01227	20xUAS-CsChrimson-mVenus-attP18	10sLED	AirLED	olfactoryArena1	Cam1	20191205T175809	6	-0.26414	-0.147938	-0.146003	-0.157267	-0.143518	-0.142953	-0.128391	-0.125936	-0.13393	-0.148373	-0.117568	-0.111448	-0.116064	-0.161489	-0.13725	-0.161776	-0.192802	-0.187658	-0.15263	-0.125643	-0.0698851	-0.0487922	-0.0780359	-0.0353103	-0.017209	-0.0828435	-0.125789	-0.101004	-0.0893544	-0.0951992	-0.0462368	0.0317937	-0.0134993	-0.021308	-0.0902568	-0.0725605	-0.0953629	-0.116558	-0.0852399	-0.0645058	-0.11127
Cos(Upwind)	SS01227	20xUAS-CsChrimson-mVenus-attP18	10sLED	AirLED	olfactoryArena1	Cam1	20191211T002423	6	-0.292863	-0.212028	-0.143858	-0.140832	-0.169935	-0.167008	-0.190559	-0.190904	-0.20685	-0.212613	-0.21133	-0.176763	-0.109932	-0.0441151	-0.0596638	-0.105652	-0.144619	-0.11753	-0.0739882	-0.0636397	-0.0919787	-0.11042	-0.146889	-0.0928771	-0.0600752	-0.0677415	-0.0898897	-0.106199	-0.0668101	-0.0689738	0.02436	0.130199	0.149782	0.107704	0.0706288	0.0724934	0.0514955	0.0143313	0.0171452	-0.00721201	-0.0568689
DeltaAnglefroPreviousFrame	SS01227	20xUAS-CsChrimson-mVenus-attP18	10sLED	AirLED	Arena2	Cam0	20191205T175610	6	117.216	118.171	102.273	111.582	100.097	117.423	118.856	126.956	116.999	130.46	104.96	101.489	102.117	119.433	108.218	124.344	107.407	91.1244	103.107	97.1086	90.3185	98.2521	103.984	116.231	104.107	101.595	114.61	111.537	102.058	98.1684	107.17	176.255	209.828	159.727	169.798	165.297	135.333	132.821	129.804	119.746	115.343
DeltaAnglefroPreviousFrame	SS01227	20xUAS-CsChrimson-mVenus-attP18	10sLED	AirLED	Arena2	Cam0	20191205T183446	6	114.955	119.225	110.239	106.319	115.383	116.745	106.261	104.096	109.734	93.3009	100.563	104.061	108.941	111.008	117.938	115.735	119.117	116.205	111.855	109.131	113.539	113.172	114.162	113.18	111.324	115.47	113.489	104.366	106.216	119.462	106.052	209.919	209.473	176.166	170.702	129.845	118.017	119.794	114.559	101.244	110.397
DeltaAnglefroPreviousFrame	SS01227	20xUAS-CsChrimson-mVenus-attP18	10sLED	AirLED	Arena2	Cam1	20191205T175610	6	99.7998	97.4721	93.7199	97.5155	98.7431	100.085	98.8309	80.6795	94.2588	83.4913	105.506	92.7057	100.689	101.783	90.7213	87.5679	97.2195	100.527	94.1675	95.486	99.7829	108.453	109.315	102.361	96.7318	91.088	88.8399	96.4119	90.6015	75.7464	138.535	145.556	131.51	144.553	137.932	122.708	121.906	118.525	128.259	122.499	109.534
DeltaAnglefroPreviousFrame	SS01227	20xUAS-CsChrimson-mVenus-attP18	10sLED	AirLED	Arena2	Cam1	20191205T183446	6	97.6374	98.1475	112	106.66	104.92	96.6008	100.096	107.191	106.049	119.787	135.532	90.4312	108.758	106.963	107.686	109.012	92.3698	94.1345	89.3222	97.4943	97.526	96.9551	94.6915	96.4785	106.13	97.3576	102.441	117.848	105.844	100.508	217.853	203.999	187.073	161.118	133.85	110.511	111.745	95.4909	93.9163	88.9837	86.2864
DeltaAnglefroPreviousFrame	SS01227	20xUAS-CsChrimson-mVenus-attP18	10sLED	AirLED	olfactoryArena1	Cam0	20191205T175809	6	85.0152	80.2122	82.0409	82.6183	87.2586	103.909	91.1095	93.3255	87.0553	93.8013	85.6495	88.4484	87.9276	90.2744	98.0256	76.7431	90.5315	85.4804	92.3851	100.425	83.9091	98.0003	91.9126	78.1051	91.5004	85.9424	80.694	88.146	80.4909	88.8634	93.6721	166.964	189.596	176.524	150.386	123.183	113.864	118.851	106.662	92.2152	86.0942
DeltaAnglefroPreviousFrame	SS01227	20xUAS-CsChrimson-mVenus-attP18	10sLED	AirLED	olfactoryArena1	Cam0	20191211T002423	6	108.619	109.258	119.007	97.2511	102.622	102.69	110.546	107.119	118.555	113.204	98.9894	98.7206	101.657	105.065	102.704	93.1672	101.241	95.7488	102.695	96.5417	84.9917	90.1269	93.1507	90.5027	101.761	93.8101	92.0719	99.5744	106.519	105.182	94.1999	189.341	159.813	124.868	108.288	95.5873	84.9852	96.5373	87.6109	70.7423	75.0095
DeltaAnglefroPreviousFrame	SS01227	20xUAS-CsChrimson-mVenus-attP18	10sLED	AirLED	olfactoryArena1	Cam1	20191205T175809	6	103.015	93.2192	80.4199	95.2403	99.0471	90.8394	99.5679	98.943	95.3383	90.1982	113	104.061	94.7127	95.9015	101.218	101.566	97.5454	91.5662	97.0121	102.372	96.2964	93.6402	95.017	90.1829	99.5087	99.829	95.5521	101.855	97.8957	101.494	174.52	195.762	178.979	167.639	133.865	143.834	107.149	106.681	102.134	101.37	108.028
DeltaAnglefroPreviousFrame	SS01227	20xUAS-CsChrimson-mVenus-attP18	10sLED	AirLED	olfactoryArena1	Cam1	20191211T002423	6	79.6938	94.0936	94.6025	102.197	99.98	105.966	98.6601	98.5307	102.368	109.421	105.254	98.2449	106.665	102.787	115.944	99.2336	94.6591	98.5435	113.382	106.979	123.682	111.703	107.231	124.016	101.268	109.648	105.494	114.052	102.632	98.5488	170.661	154.713	134.309	111.88	92.0755	97.9852	87.7722	81.0485	84.9837	83.6829	84.6595
WalkingDistanceFromPreviousFrame	SS01227	20xUAS-CsChrimson-mVenus-attP18	10sLED	AirLED	Arena2	Cam0	20191205T175610	6	1.56498	1.85905	1.66052	1.80417	1.72517	1.81486	1.74289	1.67407	1.89841	1.96382	1.73115	1.75199	1.6303	1.76477	1.8472	1.87623	1.91894	1.68474	1.64976	1.60259	1.59519	1.54987	1.54513	1.70755	1.6118	1.69862	1.73836	1.68474	1.70752	1.86081	1.84298	1.87716	1.957	2.20254	2.13046	2.16009	2.2661	2.1974	2.16033	2.0471	2.01114
WalkingDistanceFromPreviousFrame	SS01227	20xUAS-CsChrimson-mVenus-attP18	10sLED	AirLED	Arena2	Cam0	20191205T183446	6	1.39608	1.76411	1.68646	1.70739	1.58461	1.6595	1.56773	1.49384	1.59611	1.49737	1.4833	1.54161	1.51388	1.4566	1.50038	1.51536	1.56717	1.73244	1.51159	1.54418	1.57559	1.64697	1.66843	1.67642	1.71044	1.61602	1.71523	1.60812	1.6218	1.64536	1.68881	1.72541	2.02701	2.2056	2.22829	1.88213	1.71587	1.75714	1.69373	1.56526	1.50929
WalkingDistanceFromPreviousFrame	SS01227	20xUAS-CsChrimson-mVenus-attP18	10sLED	AirLED	Arena2	Cam1	20191205T175610	6	0.87266	0.988705	1.10379	1.03593	1.09387	1.06981	1.088	1.03207	1.11432	1.00984	1.15834	1.1117	1.13483	0.987169	0.8713	0.937948	1.00106	1.10968	0.926278	0.985009	1.06044	0.959189	0.967968	0.837971	0.860257	0.877387	1.03528	0.925017	0.993323	0.994734	1.19144	1.14837	1.31254	1.33144	1.39219	1.23651	1.41407	1.17161	1.10867	0.983121	1.20614
WalkingDistanceFromPreviousFrame	SS01227	20xUAS-CsChrimson-mVenus-attP18	10sLED	AirLED	Arena2	Cam1	20191205T183446	6	1.11953	1.51673	1.36806	1.58608	1.59035	1.55696	1.64236	1.63623	1.4103	1.5812	1.44952	1.44482	1.38291	1.48981	1.41247	1.51285	1.43158	1.35437	1.24363	1.31158	1.39965	1.46771	1.57413	1.37369	1.33229	1.43661	1.70849	1.71792	1.61939	1.66935	1.77347	1.96932	1.96748	1.86993	1.96197	1.7535	1.56906	1.67536	1.74862	1.75026	1.59719
WalkingDistanceFromPreviousFrame	SS01227	20xUAS-CsChrimson-mVenus-attP18	10sLED	AirLED	olfactoryArena1	Cam0	20191205T175809	6	1.03302	1.14117	1.07586	1.06326	1.22073	1.06805	1.0502	1.06502	0.981146	1.08178	1.07452	1.05225	1.11318	1.1075	1.17323	1.06415	1.17772	1.11317	1.29871	1.274	1.12453	1.166	1.21453	1.26428	1.25534	1.26914	1.2812	1.35571	1.2246	1.2933	1.34449	1.53821	1.67643	1.98852	1.91015	1.94137	1.73305	1.68032	1.65133	1.61162	1.53283
WalkingDistanceFromPreviousFrame	SS01227	20xUAS-CsChrimson-mVenus-attP18	10sLED	AirLED	olfactoryArena1	Cam0	20191211T002423	6	1.57051	1.85469	1.8791	1.7242	1.70151	1.79856	1.89768	1.60144	1.70836	1.72182	1.58079	1.46022	1.51939	1.63006	1.87922	1.87535	1.79621	1.91793	1.7197	1.64339	1.45707	1.59474	1.5349	1.56807	1.83558	1.8563	1.63327	1.8525	1.83854	1.89272	1.74592	2.37769	2.21487	2.33484	1.89587	1.58867	1.23429	1.17377	1.13947	0.830225	0.922241
WalkingDistanceFromPreviousFrame	SS01227	20xUAS-CsChrimson-mVenus-attP18	10sLED	AirLED	olfactoryArena1	Cam1	20191205T175809	6	0.951988	1.15934	0.936897	1.01547	1.06412	0.986559	1.29689	1.15445	1.05375	1.1178	1.21491	1.23992	1.12577	1.15383	1.23916	1.18207	1.20422	1.21772	1.34173	1.30554	1.23411	1.20563	1.21273	1.26952	1.28006	1.36982	1.22953	1.37555	1.21639	1.29643	1.77405	1.88184	1.81825	1.76376	1.59988	1.50641	1.42828	1.44818	1.35826	1.30641	1.23733
WalkingDistanceFromPreviousFrame	SS01227	20xUAS-CsChrimson-mVenus-attP18	10sLED	AirLED	olfactoryArena1	Cam1	20191211T002423	6	1.30092	1.39617	1.37638	1.42901	1.5265	1.3873	1.44443	1.39481	1.42113	1.64984	1.46703	1.55697	1.57923	1.44701	1.51021	1.59395	1.70823	1.45951	1.7457	1.63483	1.63046	1.54345	1.62021	1.8224	1.61559	1.72138	1.56049	1.52038	1.54428	1.49467	2.07815	1.83996	1.9263	1.54823	1.29805	1.16805	1.06936	0.970314	0.882958	0.897314	0.891723
revisit-10mmOut3mmIn-15s	SS01227	20xUAS-CsChrimson-mVenus-attP18	10sLED	AirLED	Arena2	Cam0	20191205T175610	6	0.112144	0.108531	0.119213	0.0991487	0.112009	0.137846	0.139417	0.101766	0.134741	0.162103	0.159914	0.155762	0.176611	0.176952	0.182783	0.201204	0.212101	0.230936	0.242157	0.251053	0.258989	0.276986	0.278256	0.266444	0.257574	0.281196	0.300699	0.280609	0.307336	0.270795	0.250735	0.264698	0.256929	0.267796	0.270434	0.242864	0.266204	0.2541	0.237797	0.215153	0.202331
revisit-10mmOut3mmIn-15s	SS01227	20xUAS-CsChrimson-mVenus-attP18	10sLED	AirLED	Arena2	Cam0	20191205T183446	6	0.173357	0.164164	0.149269	0.157261	0.148515	0.135965	0.136842	0.146491	0.14386	0.14386	0.153532	0.159649	0.184211	0.181009	0.166953	0.160979	0.163487	0.177286	0.19876	0.207539	0.214662	0.218421	0.215228	0.201754	0.179272	0.180136	0.212629	0.255263	0.22193	0.214912	0.191418	0.204386	0.202845	0.218421	0.172928	0.160703	0.147536	0.142105	0.136842	0.132646	0.139474
revisit-10mmOut3mmIn-15s	SS01227	20xUAS-CsChrimson-mVenus-attP18	10sLED	AirLED	Arena2	Cam1	20191205T175610	6	0.127046	0.120796	0.120726	0.128585	0.118134	0.125861	0.146377	0.141783	0.141532	0.155127	0.172569	0.159848	0.141158	0.135019	0.138127	0.145226	0.137027	0.139544	0.128603	0.10876	0.116167	0.094513	0.0946668	0.110299	0.128679	0.132091	0.111952	0.117189	0.118353	0.111281	0.106516	0.133287	0.139591	0.142656	0.147737	0.14461	0.128811	0.129538	0.133918	0.116259	0.12202
revisit-10mmOut3mmIn-15s	SS01227	20xUAS-CsChrimson-mVenus-attP18	10sLED	AirLED	Arena2	Cam1	20191205T183446	6	0.183861	0.163407	0.16773	0.166846	0.170149	0.173505	0.177778	0.192937	0.162143	0.139365	0.149983	0.148406	0.18972	0.162015	0.16561	0.1594	0.171398	0.179229	0.171813	0.186354	0.190366	0.196484	0.179536	0.154365	0.167013	0.181166	0.162778	0.170988	0.167937	0.155397	0.138227	0.128254	0.134127	0.134884	0.145556	0.154762	0.153254	0.118316	0.104762	0.0928571	0.104127
revisit-10mmOut3mmIn-15s	SS01227	20xUAS-CsChrimson-mVenus-attP18	10sLED	AirLED	olfactoryArena1	Cam0	20191205T175809	6	0.105997	0.1105	0.123155	0.136253	0.156266	0.156282	0.145969	0.151905	0.137343	0.128572	0.1228	0.132796	0.141889	0.151713	0.138501	0.138663	0.138893	0.121959	0.129274	0.107666	0.12239	0.1314	0.135231	0.148578	0.123545	0.122759	0.129971	0.144244	0.140706	0.144903	0.131475	0.13639	0.139775	0.150162	0.164468	0.139288	0.122112	0.0927842	0.0713726	0.0736519	0.0821854
revisit-10mmOut3mmIn-15s	SS01227	20xUAS-CsChrimson-mVenus-attP18	10sLED	AirLED	olfactoryArena1	Cam0	20191211T002423	6	0.144605	0.160018	0.133264	0.130676	0.131111	0.113508	0.0868056	0.0886678	0.0865681	0.0777762	0.112058	0.110655	0.0996528	0.0824755	0.0988208	0.0982062	0.111934	0.117791	0.107357	0.109845	0.159829	0.151477	0.173789	0.197769	0.162646	0.159938	0.141955	0.122062	0.119097	0.105376	0.122434	0.131783	0.149464	0.131502	0.136875	0.130418	0.123333	0.0998611	0.110994	0.10291	0.0931735
revisit-10mmOut3mmIn-15s	SS01227	20xUAS-CsChrimson-mVenus-attP18	10sLED	AirLED	olfactoryArena1	Cam1	20191205T175809	6	0.101688	0.0954343	0.0939701	0.0996882	0.121739	0.138177	0.151672	0.153675	0.138896	0.119764	0.128981	0.133581	0.133397	0.131604	0.131776	0.154326	0.176681	0.183769	0.205934	0.167906	0.158715	0.163755	0.179014	0.192122	0.218174	0.22177	0.227899	0.234365	0.236744	0.207797	0.210079	0.209456	0.160405	0.151947	0.158574	0.155432	0.170331	0.213852	0.182506	0.16511	0.183579
revisit-10mmOut3mmIn-15s	SS01227	20xUAS-CsChrimson-mVenus-attP18	10sLED	AirLED	olfactoryArena1	Cam1	20191211T002423	6	0.137043	0.1444	0.145772	0.143579	0.111152	0.107108	0.113358	0.102945	0.0934436	0.112125	0.0877621	0.100111	0.102328	0.106924	0.0922794	0.0802083	0.0620098	0.0583333	0.0666667	0.0785539	0.0863971	0.10625	0.110723	0.123346	0.113207	0.101501	0.104657	0.125004	0.123126	0.119474	0.0861686	0.0639706	0.0545956	0.0618873	0.0618873	0.0670386	0.0914828	0.0761029	0.0821078	0.0950368	0.0991422
DeltaDistanceFromCenter	MB011C	20xUAS-CsChrimson-mVenus-attP18	10sLED	AirLED	Arena2	Cam0	20190707T105421	6	0.00131015	0.0020221	0.00254305	0.0018108	-0.00203139	-0.00282971	-0.00437669	-0.000706467	-0.000477499	-0.00229074	-0.00792339	-0.00390672	-0.00156741	0.0031763	0.00758435	0.00728191	0.00293596	-0.00162714	0.0020502	0.00420791	0.00145143	0.00317027	0.00461621	0.00644225	0.0056787	0.0019635	-0.000236029	0.00139921	0.00249939	0	-0.000692455	-0.00380206	-0.0067741	-0.00408599	-0.000637959	-0.00152982	-0.00584813	-0.0101094	-0.0135051	-0.0213156	-0.0338369
DeltaDistanceFromCenter	MB011C	20xUAS-CsChrimson-mVenus-attP18	10sLED	AirLED	Arena2	Cam0	20190707T110703	6	0.00479556	0.00598078	0.00570997	0.00640319	0.00670403	0.00900752	0.00989202	0.0114469	0.00906633	0.0064277	0.00275354	0.00103143	0.0029609	0.00540836	0.00586464	0.0051297	0.00496571	0.00645812	0.00858846	0.00913423	0.000905075	0.0026702	0.00429961	0.00728984	0.00901784	0.00676487	0.0051098	0.00253238	0.00101852	0	0.00504122	0.00899319	0.0148465	0.0133437	0.00518258	-0.00558073	-0.0120124	-0.0189519	-0.0214246	-0.0231546	-0.0214769
DeltaDistanceFromCenter	MB011C	20xUAS-CsChrimson-mVenus-attP18	10sLED	AirLED	Arena2	Cam0	20190713T100917	6	-0.0372204	-0.0393846	-0.0387445	-0.037073	-0.0389883	-0.0424713	-0.0423307	-0.0403489	-0.0431251	-0.042359	-0.0337938	-0.0252186	-0.011642	-0.00792074	-0.00590743	-0.00585414	-0.0148351	-0.0215394	-0.0317649	-0.0363608	-0.0397369	-0.034653	-0.032567	-0.0307952	-0.0311836	-0.0277623	-0.023956	-0.0171158	-0.0066121	0	0.00775379	0.0147202	0.0145308	4.8561e-05	-0.0197048	-0.0359267	-0.0463345	-0.055537	-0.0679117	-0.0750287	-0.0874783
DeltaDistanceFromCenter	MB011C	20xUAS-CsChrimson-mVenus-attP18	10sLED	AirLED	Arena2	Cam0	20190803T083850	6	0.0282548	0.0318169	0.0332275	0.0315549	0.0313426	0.0287281	0.0264032	0.024144	0.0201102	0.0156995	0.00990466	0.00278606	-0.003763	-0.00896443	-0.0117846	-0.0152597	-0.0202464	-0.0211804	-0.0226581	-0.0243349	-0.0245121	-0.022455	-0.0201264	-0.0180874	-0.0130926	-0.00812194	-0.00629983	-0.00529037	-0.00341167	0	0.0019828	0.0023101	0.00162228	-0.00176638	-0.00513986	-0.00696762	-0.0083071	-0.00826779	-0.0135732	-0.0233958	-0.0358145
DeltaDistanceFromCenter	MB011C	20xUAS-CsChrimson-mVenus-attP18	10sLED	AirLED	Arena2	Cam0	20200225T134105	6	0.00242174	0.000389649	-0.00225925	-0.0044488	-0.00482512	-0.00667575	-0.00671995	-0.00776169	-0.00434849	0.00224274	0.00839287	0.0129355	0.0182813	0.0212278	0.0198392	0.0199604	0.0197165	0.0165682	0.0153844	0.0149511	0.0157003	0.0116756	0.00837961	0.00416136	-0.00149148	-0.00432614	-0.00677512	-0.00646672	-0.00293903	0	0.000901427	0.00284725	0.00414329	0.00122716	-0.00117104	-3.495e-05	0.00289122	0.000687308	0.00424202	0.00953482	0.00984773
DeltaDistanceFromCenter	MB011C	20xUAS-CsChrimson-mVenus-attP18	10sLED	AirLED	Arena2	Cam1	20190707T104343	6	0.00114548	0.00906063	0.0133489	0.0128585	0.0151599	0.016753	0.0192575	0.0226487	0.0252391	0.0220507	0.0194496	0.0226463	0.0229163	0.0206131	0.0155496	0.0106143	0.00753343	0.00596684	0.00411017	0.00494924	0.00160349	-0.00260711	-0.00213435	0.00184434	0.00319824	0.00257969	-0.00202492	-0.00309957	-0.000376023	0	0.00380658	0.000639903	-0.00110291	-0.00359675	-0.0104322	-0.0147587	-0.016567	-0.0239632	-0.0373815	-0.0507176	-0.0619234
DeltaDistanceFromCenter	MB011C	20xUAS-CsChrimson-mVenus-attP18	10sLED	AirLED	Arena2	Cam1	20190707T105421	6	-0.0281397	-0.0269448	-0.0277975	-0.0290104	-0.0282211	-0.0290459	-0.0301678	-0.0306917	-0.0309803	-0.0311259	-0.0312123	-0.0292743	-0.025722	-0.0222649	-0.0175724	-0.0145473	-0.0089216	-0.00493596	-0.00326752	-0.000748363	0.00238558	0.00471817	0.00581155	0.00508743	0.00540658	0.00482889	0.00197406	0.000889678	0.000735324	0	-0.000266684	-0.00320981	-0.00382281	-0.00474412	-0.00942192	-0.0170992	-0.0195665	-0.0243258	-0.026289	-0.0202332	-0.0241618
DeltaDistanceFromCenter	MB011C	20xUAS-CsChrimson-mVenus-attP18	10sLED	AirLED	Arena2	Cam1	20190707T110703	6	0.00299717	0.00426052	0.00465511	0.00373375	0.00413498	0.00384156	0.00291638	0.00184004	0.00180382	0.00203435	0.00204022	0.00223975	0.00099891	0.00240483	0.00281269	0.00453727	0.00533552	0.00495056	0.00533898	0.00466752	0.00283747	0.0023277	0.00179244	0.000585375	-0.000867104	-0.00128794	0.000382397	-0.000947425	-0.000611493	0	-0.000327312	-0.0011715	-0.00287578	-0.00216421	-0.00431774	-0.00577529	-0.0060179	-0.00339529	-0.00130843	-0.00379734	-0.00784801
DeltaDistanceFromCenter	MB011C	20xUAS-CsChrimson-mVenus-attP18	10sLED	AirLED	Arena2	Cam1	20190803T083850	6	-0.0591441	-0.0576152	-0.0556268	-0.0519272	-0.0467126	-0.0381384	-0.0318441	-0.0275036	-0.0251829	-0.0232729	-0.0201307	-0.0168426	-0.0134229	-0.0137198	-0.0138798	-0.0137968	-0.0144038	-0.0144417	-0.0146468	-0.016078	-0.0179606	-0.0177482	-0.0178956	-0.0163291	-0.0110681	-0.0086787	-0.00165616	0.00278131	0.0028423	0	-0.00363147	-0.00542001	-0.0140855	-0.0297589	-0.050008	-0.0731421	-0.0901982	-0.10119	-0.111006	-0.117945	-0.123831
DeltaDistanceFromCenter	MB011C	20xUAS-CsChrimson-mVenus-attP18	10sLED	AirLED	olfactoryArena1	Cam0	20190707T104807	6	-0.00450472	-0.00500254	-0.00408491	0.00214585	0.00322228	0.00591206	0.00675883	0.00688654	-0.00226999	0.00134348	0.00852489	0.010053	0.0108761	0.00893412	0.00676063	0.0031375	0.00192864	0.00648008	0.0122805	0.00870534	0.00953341	0.0108549	0.00922797	0.000213049	-0.00620708	-0.0118637	-0.0161231	-0.0124042	-0.00779913	0	0.0120849	0.0197359	0.0249532	0.0309084	0.0382092	0.0382371	0.0308174	0.0210832	0.00824312	-0.0169978	-0.0398701
DeltaDistanceFromCenter	MB011C	20xUAS-CsChrimson-mVenus-attP18	10sLED	AirLED	olfactoryArena1	Cam0	20190707T105742	6	-0.0156933	-0.0154055	-0.0199906	-0.0278088	-0.0315739	-0.0318043	-0.0291098	-0.0278509	-0.0237116	-0.0160156	-0.0102637	-0.0100156	-0.00918314	-0.00955154	-0.0146745	-0.0170502	-0.0194765	-0.0188961	-0.0155948	-0.0108835	0.000587075	0.0050755	0.00680265	0.00908849	0.00733597	0.00568798	0.00473465	0.000576364	-0.00110129	0	-0.00368381	-0.0016708	-0.00140347	-0.00349872	-0.016795	-0.0318487	-0.0387392	-0.0404049	-0.0400036	-0.0455402	-0.0542234
DeltaDistanceFromCenter	MB011C	20xUAS-CsChrimson-mVenus-attP18	10sLED	AirLED	olfactoryArena1	Cam0	20190707T111027	6	0.00395083	0.00415441	0.00730552	0.0108365	0.0139978	0.0147211	0.0137636	0.0129695	0.0117924	0.0130174	0.0121095	0.0112868	0.0111346	0.0101912	0.00455174	0.00238525	-9.6391e-05	0.000509666	-0.000464334	-0.000925512	0.00169215	0.00405605	0.00778868	0.00854289	0.0051192	0.0026984	0.00192996	0.0007847	-0.000483036	0	0.00365446	0.00532609	0.00778256	0.00565945	0.0019729	-0.00573016	-0.0150137	-0.0222908	-0.0288042	-0.0338503	-0.0381298
DeltaDistanceFromCenter	MB011C	20xUAS-CsChrimson-mVenus-attP18	10sLED	AirLED	olfactoryArena1	Cam0	20190713T101455	6	-0.0230694	-0.0208141	-0.0210518	-0.0165511	-0.0104187	-0.00579544	-0.00604293	-0.00670697	-0.00921244	-0.00973746	-0.01257	-0.00722983	-0.00163634	0.00295383	-0.00149941	-0.012487	-0.0189411	-0.0256266	-0.0213504	-0.00755276	0.000622035	0.00338218	1.443e-05	-0.0067355	-0.00664368	-0.00260038	0.00427947	0.00500662	0.00360798	0	-0.00167553	-0.00226299	-0.0101351	-0.0223831	-0.0339011	-0.0530125	-0.0671431	-0.0690223	-0.0713999	-0.076194	-0.084164
DeltaDistanceFromCenter	MB011C	20xUAS-CsChrimson-mVenus-attP18	10sLED	AirLED	olfactoryArena1	Cam0	20190803T084129	6	-0.019053	-0.00360082	0.00106935	0.00522141	0.00722758	0.00505668	-0.00179143	-0.00969287	-0.0203356	-0.0271193	-0.0402572	-0.0518652	-0.0428415	-0.0352463	-0.0405367	-0.0494026	-0.0478157	-0.052288	-0.0707924	-0.064014	-0.0507089	-0.0429001	-0.0286934	-0.0154654	-0.0112915	-0.00962052	-0.00532458	-0.00700392	-0.00774709	0	0.0041933	-0.000474559	0.00643518	0.00442361	-0.00139162	-0.0104105	-0.0173074	-0.0222222	-0.0299785	-0.0283444	-0.0158174
DeltaDistanceFromCenter	MB011C	20xUAS-CsChrimson-mVenus-attP18	10sLED	AirLED	olfactoryArena1	Cam0	20200225T134438	6	-0.00608012	-0.0109037	-0.0179446	-0.0213241	-0.0224208	-0.0245943	-0.022488	-0.0192581	-0.0114846	-0.00807806	-0.00693666	-0.000637342	0.0010435	0.00175191	1.1141e-05	-0.00126652	-0.00147983	-0.00156754	0.00034564	-0.00371456	-0.00385735	-0.00385075	-0.000567934	0.00335981	0.00495706	0.00839962	0.00887091	0.00696582	0.00513252	0	0.000176507	0.00186485	0.00375044	0.003576	0.00297065	0.00539768	0.00294593	-0.00733854	-0.0152677	-0.0232163	-0.0460191
DeltaDistanceFromCenter	MB011C	20xUAS-CsChrimson-mVenus-attP18	10sLED	AirLED	olfactoryArena1	Cam1	20190707T104807	6	-0.0159154	-0.0141708	-0.013864	-0.0181765	-0.0197755	-0.0247477	-0.030423	-0.0301653	-0.0247161	-0.0203091	-0.0220716	-0.0238269	-0.0290638	-0.0284166	-0.0323034	-0.02994	-0.0284677	-0.0275515	-0.0250007	-0.0229624	-0.0236198	-0.0239852	-0.020723	-0.0136732	-0.00902075	-0.00778057	-0.0065616	-0.00524657	-0.00170544	0	0.00013755	-0.00513216	-0.0110262	-0.0171943	-0.030146	-0.0370601	-0.0447053	-0.0507536	-0.0591515	-0.0636772	-0.0645617
DeltaDistanceFromCenter	MB011C	20xUAS-CsChrimson-mVenus-attP18	10sLED	AirLED	olfactoryArena1	Cam1	20190707T105742	6	-0.0137597	-0.0125615	-0.0129806	-0.0121222	-0.010952	-0.0108204	-0.0101431	-0.00893137	-0.00932707	-0.010094	-0.0107469	-0.0123109	-0.0107403	-0.00971548	-0.00961145	-0.0101736	-0.0096622	-0.00957141	-0.00881854	-0.00667104	-0.00527182	-0.00613931	-0.00603624	-0.00406382	-0.00137193	-0.000791079	-0.000864604	-0.00014332	0.000694438	0	0.000679638	7.7479e-05	-9.3612e-05	0.00268089	0.00560106	0.006808	0.00693681	0.00677639	0.00638573	0.00643249	0.00356741
DeltaDistanceFromCenter	MB011C	20xUAS-CsChrimson-mVenus-attP18	10sLED	AirLED	olfactoryArena1	Cam1	20190707T111027	6	-0.00213691	-0.00145425	-0.000303714	-1.8951e-05	-0.000810842	-0.00151567	-0.00165337	-0.00161717	-0.00161338	-0.00170883	-0.0030388	-0.0056949	-0.00571936	-0.0053725	-0.0052081	-0.0043522	-0.00377322	-0.0052424	-0.00599744	-0.00536646	-0.0053885	-0.00554799	-0.00456516	-0.00403416	-0.00330817	-0.00252848	-0.00284422	-0.00274323	-0.00197356	0	0.000793833	-0.00175264	-0.00444015	-0.00689257	-0.00729649	-0.00811702	-0.0137293	-0.0198371	-0.0241747	-0.0226448	-0.01848
DeltaDistanceFromCenter	MB011C	20xUAS-CsChrimson-mVenus-attP18	10sLED	AirLED	olfactoryArena1	Cam1	20190713T101455	6	-0.00794605	-0.00670385	-0.0114431	-0.0164944	-0.0170234	-0.0182397	-0.020348	-0.0214116	-0.0212831	-0.0184498	-0.016869	-0.0119274	-0.0104328	-0.00938249	-0.00878921	-0.00560891	-0.00348998	-0.00260548	-0.000846924	-0.0042062	0.00177429	0.00306239	0.00536435	0.00517733	0.0074103	0.00653622	0.00541676	0.00266308	0.00198841	0	-0.0036741	-0.00913389	-0.0184504	-0.0293208	-0.0465706	-0.0633238	-0.0789707	-0.0912947	-0.101501	-0.107949	-0.109566
DeltaDistanceFromCenter	MB011C	20xUAS-CsChrimson-mVenus-attP18	10sLED	AirLED	olfactoryArena1	Cam1	20190803T084129	6	0.0375051	0.0421302	0.0457319	0.0428578	0.0427856	0.0471549	0.0442981	0.0416095	0.0418883	0.0469027	0.0482146	0.0420097	0.0338908	0.02825	0.0257053	0.0256697	0.0253782	0.0252118	0.0271628	0.0257267	0.0280478	0.0265087	0.0258641	0.0202544	0.0151272	0.0179312	0.0228566	0.0227584	0.0144739	0	-0.00982414	-0.0121137	-0.0139549	-0.0174674	-0.0162879	-0.0140585	-0.0083567	-0.00264861	-0.00507076	-0.00634949	-0.0166354
DeltaDistanceFromCenter	MB011C	20xUAS-CsChrimson-mVenus-attP18	10sLED	AirLED	olfactoryArena1	Cam1	20200225T134438	6	-0.00689027	-0.00458313	-0.00535663	-0.00765147	-0.00855856	-0.00800028	-0.00824218	-0.00321723	0.00543638	0.00949155	-0.000972285	-0.00143574	0.000302742	-0.00030257	-0.00110098	-0.00796347	-0.0050019	-0.00299921	-0.00162841	0.00217882	0.00645035	0.00632598	0.00914448	0.00846593	0.0087201	0.00907458	0.00939175	0.00969102	0.007085	0	-0.00482111	-0.00763279	-0.0126403	-0.0187519	-0.0295659	-0.0411024	-0.0474684	-0.0519108	-0.056411	-0.0613822	-0.0685598
DeltaDistanceFromCenter	MB011C	20xUAS-CsChrimson-mVenus-attP18	10sLED	AirLED	Arena2	Cam1	20190713T100917	5	-0.0101774	-0.00281334	0.002822	0.00653338	0.00702178	0.00648281	0.00531673	0.00140514	0.0031721	0.00387866	0.00494949	0.00589294	0.0114175	0.012936	0.0115589	0.00926016	0.00635694	0.00470646	0.00734684	0.00877045	0.0101347	0.00858152	0.010798	0.0117789	0.0112432	0.0104769	0.00665366	0.0025518	-0.00228522	0	0.000373192	-0.009227	-0.0152906	-0.0234901	-0.0375014	-0.0504934	-0.0608978	-0.0658323	-0.0695967	-0.0722482	-0.0791054
DeltaDistanceFromCenter	MB011C	20xUAS-CsChrimson-mVenus-attP18	10sLED	AirLED	Arena2	Cam1	20200225T134105	5	-0.0194611	-0.0170607	-0.0232017	-0.0263194	-0.0286751	-0.0307949	-0.0362152	-0.0394916	-0.0411493	-0.0392331	-0.0354266	-0.0330502	-0.0305825	-0.0310013	-0.0311772	-0.0307338	-0.0290095	-0.0264976	-0.0274754	-0.0220457	-0.0269771	-0.0249827	-0.0169563	-0.00535503	0.00355169	0.00772262	0.00622618	0.00297327	0.000181631	0	-0.00181503	-0.00416311	-0.00310269	-0.00832679	-0.0256844	-0.0396981	-0.0420696	-0.044829	-0.0456229	-0.0487487	-0.0538433
DeltaDistanceFromCenter	MB011C	20xUAS-CsChrimson-mVenus-attP18	10sLED	AirLED	Arena2	Cam0	20190707T104343	4	-0.0157642	-0.0238779	-0.0194782	-0.0172863	-0.0100623	-0.00807127	0.001966	0.00734124	0.0161229	0.0257645	0.0314008	0.0324623	0.0262925	0.015017	-0.00226438	-0.00687343	-0.00731271	0.00181851	0.00677486	0.00512412	0.00160086	0.00809007	0.00603466	0.000835267	0.00741399	0.00642709	0.000424069	-0.0123112	-0.0164878	0	0.0143016	0.0170258	0.0212382	0.0227574	0.0118077	-0.000890798	-0.0221998	-0.0325007	-0.050232	-0.0560134	-0.0653895
Cos(Upwind)	MB011C	20xUAS-CsChrimson-mVenus-attP18	10sLED	AirLED	Arena2	Cam0	20190707T105421	6	0.0545338	0.0613356	0.0781608	0.0139986	-0.0193994	0.0196246	0.0118157	0.0048226	-0.0135421	-0.0474449	-0.0146376	0.0381631	0.0696418	0.0674297	0.0367508	0.0462477	-0.0114498	-0.00301862	0.00484245	-0.0271382	-0.0187896	-0.008314	-0.00941909	-0.0164109	-0.0019655	0.00855199	-0.0240545	-0.0342596	-0.0513161	-0.0610417	-0.0513035	-0.0443311	-0.0147117	0.0621588	0.0399854	0.0149508	-0.00514421	-0.0309541	0.0432228	-0.0123863	-0.0510389
Cos(Upwind)	MB011C	20xUAS-CsChrimson-mVenus-attP18	10sLED	AirLED	Arena2	Cam0	20190707T110703	6	0.0913135	0.050614	0.0824819	0.0768353	0.05439	0.0737575	0.0779451	0.0583896	0.0421483	0.0186853	0.0356715	0.0561876	0.0840869	0.0661824	0.0449254	0.0709753	0.0594014	0.0416382	0.0646077	0.0381098	-0.00334344	0.00045543	0.00669099	0.00378991	0.000832713	-0.0114174	-0.0349267	-0.0425312	-0.0263526	-0.00313905	0.0112326	0.0635251	0.0478953	-0.0182046	-0.0957937	-0.128173	-0.116204	-0.0907943	-0.0849702	-0.0566201	-0.0526163
Cos(Upwind)	MB011C	20xUAS-CsChrimson-mVenus-attP18	10sLED	AirLED	Arena2	Cam0	20190713T100917	6	-0.174382	-0.0752274	-0.00861598	-0.0414841	-0.0557518	-0.0218352	0.0177067	-0.00640063	-0.0584175	-0.0403543	-0.0645609	-0.0500703	-0.0079057	-0.0103685	0.0132863	-0.0422549	-0.0839519	-0.0943784	-0.0992808	-0.103459	-0.0787931	-0.0758421	-0.0437952	-0.0360364	-0.0751312	-0.0549306	-0.0289169	-0.0292221	-0.0229224	-0.00560931	0.00269387	0.0348489	0.0103663	-0.0730711	-0.167639	-0.17707	-0.174112	-0.218319	-0.269144	-0.284521	-0.30548
Cos(Upwind)	MB011C	20xUAS-CsChrimson-mVenus-attP18	10sLED	AirLED	Arena2	Cam0	20190803T083850	6	-0.224963	-0.0962834	-0.107722	-0.0942994	-0.102307	-0.127878	-0.122715	-0.0960743	-0.0994865	-0.096185	-0.0982352	-0.107933	-0.102439	-0.0992424	-0.0927641	-0.0955977	-0.0939351	-0.0918736	-0.0961362	-0.0939054	-0.0599028	-0.0470243	-0.0639177	-0.0633954	-0.0782551	-0.0737513	-0.0902586	-0.0986137	-0.0773578	-0.0645671	-0.0906575	-0.0701335	0.0254848	0.0082986	0.0320616	0.0831242	0.0721699	0.0677944	0.022616	-0.0260461	-0.0698217
Cos(Upwind)	MB011C	20xUAS-CsChrimson-mVenus-attP18	10sLED	AirLED	Arena2	Cam0	20200225T134105	6	-0.0577127	-0.0537734	-0.0629286	-0.0281781	-0.0231327	-0.038593	-0.0650254	-0.091743	-0.0374867	-0.0112291	0.00728276	0.0119486	0.0152726	-0.0270355	-0.0636669	-0.0626402	-0.041295	-0.0748646	-0.0713279	-0.0834622	-0.0672976	-0.0693729	-0.0847643	-0.0739576	-0.0577853	-0.101422	-0.0642313	-0.0651877	-0.0534142	-0.0131986	-0.00699535	0.03507	0.0477209	0.0588362	0.136623	0.128995	0.125066	0.135366	0.156426	0.105323	-0.0179101
Cos(Upwind)	MB011C	20xUAS-CsChrimson-mVenus-attP18	10sLED	AirLED	Arena2	Cam1	20190707T104343	6	-0.0671386	-0.0583705	-0.12916	-0.144942	-0.138888	-0.14884	-0.135109	-0.145664	-0.135852	-0.21689	-0.194591	-0.184569	-0.211012	-0.225145	-0.25802	-0.245687	-0.189279	-0.189998	-0.179862	-0.160751	-0.1796	-0.137835	-0.155369	-0.145241	-0.141167	-0.124023	-0.155267	-0.136654	-0.124236	-0.137462	-0.0931395	-0.0579038	-0.0443153	-0.0915675	-0.0503984	-0.0378792	-0.0594962	-0.103707	-0.144749	-0.142944	-0.164821
Cos(Upwind)	MB011C	20xUAS-CsChrimson-mVenus-attP18	10sLED	AirLED	Arena2	Cam1	20190707T105421	6	-0.0680816	-0.0906113	-0.103097	-0.100762	-0.0955976	-0.0902312	-0.081811	-0.0838868	-0.0655039	-0.0512666	-0.0341026	-0.0230212	-0.000916519	0.0132672	0.00992226	0.000929258	-0.0012644	-0.0147842	-0.0595938	-0.0546653	-0.0409865	-0.0434014	-0.0528568	-0.0638012	-0.0516939	-0.0554405	-0.0732521	-0.0701228	-0.0853203	-0.101013	-0.0997192	-0.0588128	0.0253127	0.0433529	0.0369612	0.0407867	0.0311777	0.0418535	0.0541717	0.073687	0.0237885
Cos(Upwind)	MB011C	20xUAS-CsChrimson-mVenus-attP18	10sLED	AirLED	Arena2	Cam1	20190707T110703	6	-0.0291433	0.024807	0.0257218	0.019996	0.0178199	0.0014312	-0.000597156	0.00294218	-0.00140231	0.00127085	0.0122212	0.017975	0.018807	0.00585794	0.00336966	0.0130949	0.00620608	-0.0131776	-0.0180402	-0.0245102	-0.0302496	-0.0205103	-0.0220912	-0.0205218	-0.0245701	-0.0160605	-0.020248	-0.0136945	-0.00877028	-0.010538	-0.0113512	0.0315697	0.0340393	0.074143	0.0659681	0.0782602	0.0678037	0.0366057	0.0251113	-0.00607771	-0.00930889
Cos(Upwind)	MB011C	20xUAS-CsChrimson-mVenus-attP18	10sLED	AirLED	Arena2	Cam1	20190803T083850	6	-0.117189	-0.0498738	-0.0250537	-0.04844	-0.0178862	0.0192297	0.0285282	0.0463994	0.054828	-0.00919694	0.00345699	0.00708912	-0.0119268	-0.00229139	0.00549305	-0.00756546	-0.0494974	-0.0423966	-0.0258702	-0.0325372	-0.0279579	-0.00327302	-0.00695206	-0.00551518	0.00294642	0.009723	0.0408037	0.00817257	0.0031411	-0.0176341	-0.0129698	0.0146994	-0.00172511	-0.0499573	-0.101597	-0.114177	-0.137465	-0.139693	-0.139027	-0.108024	-0.119653
Cos(Upwind)	MB011C	20xUAS-CsChrimson-mVenus-attP18	10sLED	AirLED	olfactoryArena1	Cam0	20190707T104807	6	-0.00700754	-0.0374547	0.00110602	0.0570411	0.0369177	0.0153055	-0.0375699	-0.110383	-0.0579977	-0.0122854	-0.0568298	-0.110903	-0.070138	-0.0487266	-0.0503884	-0.0229886	0.0144682	-0.00776915	-0.00390157	0.0204292	-0.0317482	-0.0595843	-0.0720281	-0.0758682	-0.105125	-0.0566638	-0.0528454	0.0322284	0.0971699	0.0985777	0.0265932	0.0411062	0.0132634	0.0240087	0.081751	0.0239823	-0.0121699	-0.071314	-0.156583	-0.232252	-0.233692
Cos(Upwind)	MB011C	20xUAS-CsChrimson-mVenus-attP18	10sLED	AirLED	olfactoryArena1	Cam0	20190707T105742	6	-0.0490007	-0.067091	-0.0615922	-0.0150586	-0.00997487	-0.028841	0.01257	0.0449865	0.0861324	0.130508	0.118181	0.0942055	0.0653095	0.0407599	0.0457731	0.0640394	0.0737094	0.111475	0.118034	0.118419	0.13845	0.0929536	0.0879507	0.117858	0.133386	0.0372673	0.0210441	0.0541267	0.0599704	0.069319	0.0157089	0.0225693	-0.00688031	-0.00908092	-0.0986711	-0.0575843	0.0139893	0.016327	-0.00848427	-0.0471007	-0.123282
Cos(Upwind)	MB011C	20xUAS-CsChrimson-mVenus-attP18	10sLED	AirLED	olfactoryArena1	Cam0	20190707T111027	6	-0.0699313	-0.0441465	-0.046114	-0.0422548	-0.0555957	-0.0466033	-0.0537251	-0.0673194	-0.072728	-0.0530081	-0.0460288	-0.0515349	-0.0758121	-0.092517	-0.0995493	-0.0935748	-0.0949466	-0.0967888	-0.093527	-0.0816511	-0.063674	-0.0296138	-0.0173255	-0.0217936	-0.0376423	-0.0333642	-0.00644628	-0.0102466	0.00367078	0.030334	0.0374048	0.0558597	0.0776488	0.0419567	0.0050929	-0.00328077	0.0246849	-0.0399062	-0.0375322	-0.0325327	-0.0317389
Cos(Upwind)	MB011C	20xUAS-CsChrimson-mVenus-attP18	10sLED	AirLED	olfactoryArena1	Cam0	20190713T101455	6	-0.0309937	-0.114408	-0.124101	-0.0910584	-0.0859388	-0.0813176	-0.115131	-0.139267	-0.12703	-0.0950506	-0.122198	-0.133733	-0.133351	-0.127653	-0.118365	-0.158789	-0.152271	-0.214664	-0.160296	-0.0909972	-0.0808287	-0.0735541	-0.129842	-0.164918	-0.138216	-0.0735571	-0.0300845	-0.0241604	-0.0567926	-0.0943299	-0.068304	-0.0404876	-0.0715697	-0.0733378	-0.036785	-0.0405562	-0.0434005	-0.0504472	-0.0858978	-0.119384	-0.152019
Cos(Upwind)	MB011C	20xUAS-CsChrimson-mVenus-attP18	10sLED	AirLED	olfactoryArena1	Cam0	20190803T084129	6	-0.117807	-0.1873	-0.0824467	-0.107798	-0.134024	-0.0957843	-0.125443	-0.175671	-0.137686	-0.119053	-0.106191	-0.0954429	-0.0476093	-0.0418719	-0.0502686	-0.0776582	-0.0941641	-0.0868456	-0.0695797	-0.0701551	-0.0121955	0.0157225	0.0153924	0.0818717	0.00219408	-0.0427147	-0.099772	-0.0589689	-0.0235853	0.0466998	0.0221662	0.0348422	0.0984882	0.0556167	0.0882813	0.0656267	0.0385318	0.0481288	0.0334434	0.00697994	0.0341825
Cos(Upwind)	MB011C	20xUAS-CsChrimson-mVenus-attP18	10sLED	AirLED	olfactoryArena1	Cam0	20200225T134438	6	-0.159484	-0.114258	-0.131963	-0.118216	-0.121632	-0.129544	-0.146477	-0.135271	-0.117838	-0.118699	-0.113665	-0.133524	-0.147056	-0.14262	-0.167769	-0.170991	-0.184819	-0.165309	-0.15193	-0.115343	-0.0720604	-0.0352501	-0.0309933	-0.0236755	-0.0746104	-0.0816659	-0.0906013	-0.073617	-0.107698	-0.144066	-0.107748	-0.00856419	0.0596558	0.0791999	0.114982	0.0800355	0.0253918	-0.0340203	-0.0800138	-0.107318	-0.149397
Cos(Upwind)	MB011C	20xUAS-CsChrimson-mVenus-attP18	10sLED	AirLED	olfactoryArena1	Cam1	20190707T104807	6	-0.168135	-0.167266	-0.122297	-0.128637	-0.119756	-0.0936379	-0.0666903	-0.0666184	-0.00989311	0.0215282	0.00648973	-0.0230596	-0.0142082	-0.0153879	-0.0627455	-0.0475117	-0.0343415	-0.0241707	0.00941894	-0.0179593	-0.0174709	-0.0133661	0.0148158	-0.027625	-0.0328983	-0.0341493	-0.0586425	-0.0760962	-0.0467641	-0.0676626	-0.0186387	-0.0678868	-0.0348593	-0.0626928	-0.0631115	-0.0345438	-0.0368591	-0.0366664	-0.0749198	-0.104349	-0.0745414
Cos(Upwind)	MB011C	20xUAS-CsChrimson-mVenus-attP18	10sLED	AirLED	olfactoryArena1	Cam1	20190707T105742	6	-0.161835	-0.132914	-0.147831	-0.149777	-0.1209	-0.123739	-0.124285	-0.120108	-0.138928	-0.116286	-0.111119	-0.0962834	-0.0754579	-0.101398	-0.146884	-0.152137	-0.151949	-0.141445	-0.105727	-0.104633	-0.121459	-0.133024	-0.121553	-0.102651	-0.0889921	-0.134267	-0.155105	-0.17171	-0.170854	-0.163794	-0.108882	-0.0711881	-0.00852007	0.118136	0.0694748	0.0570569	0.058771	0.0101688	-0.0267288	-0.0565556	-0.0885112
Cos(Upwind)	MB011C	20xUAS-CsChrimson-mVenus-attP18	10sLED	AirLED	olfactoryArena1	Cam1	20190707T111027	6	-0.167515	-0.0574729	-0.076247	-0.0777409	-0.0626286	-0.0709981	-0.0467037	-0.0439274	-0.0548167	-0.0599201	-0.0665747	-0.0959862	-0.0657123	-0.0473747	-0.0568594	-0.0428591	-0.0338748	-0.0644682	-0.051154	-0.0170944	-0.029138	-0.0204851	-0.041935	-0.0383044	-0.0444722	-0.0199454	-0.0209583	-0.00880446	-0.0164346	-0.0120254	-0.016198	-0.026481	0.0172183	0.0302179	0.0326961	0.0228246	-0.00685151	0.0149013	0.0300804	0.0610804	0.0538966
Cos(Upwind)	MB011C	20xUAS-CsChrimson-mVenus-attP18	10sLED	AirLED	olfactoryArena1	Cam1	20190713T101455	6	-0.201303	-0.187815	-0.198613	-0.183029	-0.172116	-0.153296	-0.106719	-0.0940131	-0.0683683	-0.0641219	-0.105841	-0.0854881	-0.0586591	-0.0456474	-0.0496585	-0.0674062	-0.0598428	-0.0556119	-0.0589578	-0.0716182	-0.0335756	-0.048015	-0.04851	-0.0802757	-0.0869134	-0.0625559	-0.0981748	-0.120805	-0.11759	-0.0947871	-0.0388468	-0.0203172	-0.0527409	-0.0845237	-0.13378	-0.200901	-0.220643	-0.22655	-0.239576	-0.239228	-0.212331
Cos(Upwind)	MB011C	20xUAS-CsChrimson-mVenus-attP18	10sLED	AirLED	olfactoryArena1	Cam1	20190803T084129	6	-0.128026	-0.160766	-0.124707	-0.164812	-0.126206	-0.134897	-0.164118	-0.180751	-0.178058	-0.163073	-0.15246	-0.176133	-0.171106	-0.128107	-0.0537697	-0.0676073	-0.0767228	-0.0624415	-0.0997501	-0.166799	-0.136252	-0.15569	-0.140701	-0.162889	-0.169146	-0.110141	-0.0939826	-0.142393	-0.179425	-0.191569	-0.112231	-0.0474377	-0.00298594	0.00663619	0.0370193	0.0560043	0.059463	0.077617	0.0401541	0.0122406	-0.00615733
Cos(Upwind)	MB011C	20xUAS-CsChrimson-mVenus-attP18	10sLED	AirLED	olfactoryArena1	Cam1	20200225T134438	6	-0.183493	-0.080964	-0.115815	-0.119146	-0.110936	-0.103535	-0.0577024	-0.0163069	-0.0140538	-0.0312327	-0.0902081	-0.101687	-0.0670154	-0.0615641	-0.099159	-0.118319	-0.096106	-0.103647	-0.141202	-0.0871429	-0.0922041	-0.117289	-0.125715	-0.101964	-0.125277	-0.156737	-0.156476	-0.159702	-0.210748	-0.262767	-0.162984	-0.0722603	-0.0302707	0.0278181	0.025214	0.0150632	-0.0240028	-0.0320353	-0.0547486	-0.104026	-0.142093
Cos(Upwind)	MB011C	20xUAS-CsChrimson-mVenus-attP18	10sLED	AirLED	Arena2	Cam1	20190713T100917	5	0.0313921	-0.0416526	-0.0856762	-0.115987	-0.127737	-0.160157	-0.14718	-0.117333	-0.0963555	-0.0851788	-0.100233	-0.0604832	-0.0341357	-0.0338334	-0.0271553	-0.063601	-0.0305049	0.030333	0.0165924	0.00293418	-0.0351413	-0.0602459	-0.058948	-0.0338521	-0.00387354	0.00601868	-0.042024	-0.0553257	-0.0359469	0.0112587	0.00664215	-0.0715955	-0.0582334	-0.133013	-0.161248	-0.197489	-0.209902	-0.17231	-0.164719	-0.183831	-0.206848
Cos(Upwind)	MB011C	20xUAS-CsChrimson-mVenus-attP18	10sLED	AirLED	Arena2	Cam1	20200225T134105	5	0.0224978	0.00392272	-0.0232599	-0.0323116	-0.0303762	-0.054562	-0.0811243	-0.0914607	-0.0670092	-0.0477372	-0.0466292	-0.0418851	-0.036842	-0.0409522	-0.0245508	-0.0471451	0.00192522	0.0109766	-0.0190373	-0.0214123	-0.0410508	-0.00655921	0.0267631	0.0309695	0.0222438	0.0488979	-0.0107422	-0.0741126	-0.101163	-0.109614	-0.0554169	0.00240662	0.0771673	0.0153777	-0.00987414	-0.0357043	-0.035763	-0.0328631	-0.0693068	-0.116292	-0.146294
Cos(Upwind)	MB011C	20xUAS-CsChrimson-mVenus-attP18	10sLED	AirLED	Arena2	Cam0	20190707T104343	4	0.0322866	-0.00773334	0.0429494	-0.0117867	-0.0209822	0.0187569	-0.00817271	0.0213496	0.0767337	0.139116	0.0613658	0.00345862	-0.0265455	-0.0509966	-0.025784	0.0104145	-0.00535745	-0.00756513	0.0087783	0.0402177	-0.0142413	0.0177298	-0.0309582	0.0287263	-0.0188763	-0.0423672	-0.051186	-0.0901639	-0.0127596	0.0360187	0.0303878	0.0607754	0.0348735	-0.0269944	-0.00270707	-0.0743022	-0.0802711	-0.0853845	-0.153724	-0.0579956	-0.0580195
DeltaAnglefroPreviousFrame	MB011C	20xUAS-CsChrimson-mVenus-attP18	10sLED	AirLED	Arena2	Cam0	20190707T105421	6	112.1	66.0025	70.9079	81.7331	56.2165	82.4282	97.1013	72.2028	71.9539	72.0344	66.0539	51.9194	50.9006	56.4914	57.633	69.7171	56.8825	62.0382	64.6366	67.1389	54.1445	59.7178	57.3601	56.8928	57.9108	57.2031	55.7786	57.4718	60.2949	58.8781	60.5966	131.133	167.861	190.053	168.918	148.043	126.305	113.572	127.22	118.288	126.512
DeltaAnglefroPreviousFrame	MB011C	20xUAS-CsChrimson-mVenus-attP18	10sLED	AirLED	Arena2	Cam0	20190707T110703	6	105.111	48.4569	46.5344	51.0502	58.51	42.2109	37.2827	49.1395	41.2306	47.6894	50.4416	47.6781	52.9607	50.3288	43.1982	52.3545	43.5186	45.1759	38.603	44.7812	69.1135	54.739	57.2055	52.5536	67.9264	58.3466	57.6331	54.7498	64.5847	56.1742	56.3633	120.898	126.11	138.344	135.935	108.735	113.272	128.003	118.993	117.838	105.735
DeltaAnglefroPreviousFrame	MB011C	20xUAS-CsChrimson-mVenus-attP18	10sLED	AirLED	Arena2	Cam0	20190713T100917	6	93.211	95.0892	96.5474	85.7021	103.925	103.969	93.5921	93.0496	98.8001	90.0001	83.1591	95.1765	87.2967	100.475	96.7491	92.9228	103.133	79.8416	80.5557	79.4339	78.5701	90.259	105.656	91.9544	87.1309	98.2149	80.1288	85.2186	83.16	80.6584	90.2991	164.036	180.676	167.103	126.718	108.507	91.5127	78.6757	85.4236	81.017	52.9474
DeltaAnglefroPreviousFrame	MB011C	20xUAS-CsChrimson-mVenus-attP18	10sLED	AirLED	Arena2	Cam0	20190803T083850	6	103.214	51.1647	51.6003	46.4207	47.0552	44.4891	48.2692	51.0086	46.8447	53.8492	50.3906	51.2828	49.2256	49.9504	44.7788	53.3664	57.7184	54.9305	56.3397	57.3523	49.5133	50.7542	46.7442	48.3133	50.998	51.7519	55.5754	47.2791	51.2762	50.4893	49.5519	122.245	113.216	105.508	86.291	89.6224	83.9384	79.091	73.9256	79.1722	76.0554
DeltaAnglefroPreviousFrame	MB011C	20xUAS-CsChrimson-mVenus-attP18	10sLED	AirLED	Arena2	Cam0	20200225T134105	6	93.4722	78.9727	70.9594	70.4421	80.1746	77.6512	79.838	78.4202	77.0914	79.7984	76.2429	78.8935	75.8483	89.2403	93.5699	91.1031	95.568	73.0819	80.6239	67.5651	79.4597	77.6004	69.6096	73.3636	75.9434	72.5746	75.3522	83.311	86.8337	79.4201	89.8637	162.386	143.251	144.414	148.248	137.898	114.92	110.839	107.724	110.44	119.514
DeltaAnglefroPreviousFrame	MB011C	20xUAS-CsChrimson-mVenus-attP18	10sLED	AirLED	Arena2	Cam1	20190707T104343	6	98.2912	98.7125	95.6962	98.086	97.1065	93.2418	90.4713	90.3746	95.5621	93.8778	104.585	81.7667	89.905	92.2719	88.466	81.1321	84.291	82.2083	85.0419	91.49	84.1628	84.9155	90.1515	84.1484	81.8837	100.726	85.5477	86.3489	85.3506	74.2788	151.718	155.847	152.896	141.806	134.31	126.265	112.148	92.0713	93.0052	89.5092	95.8118
DeltaAnglefroPreviousFrame	MB011C	20xUAS-CsChrimson-mVenus-attP18	10sLED	AirLED	Arena2	Cam1	20190707T105421	6	67.5196	17.3602	20.9224	19.4685	20.6783	22.7409	23.4954	19.7096	21.3028	18.0113	24.0266	22.3924	21.1774	23.3684	22.7606	22.3018	22.419	30.3022	27.6013	25.1761	25.6596	28.4067	28.1977	33.9775	30.5925	27.5233	26.3363	24.5565	30.6313	30.5198	81.0074	133.229	148.415	121.441	106.017	93.1601	75.3042	96.9879	76.7553	81.6452	65.1262
DeltaAnglefroPreviousFrame	MB011C	20xUAS-CsChrimson-mVenus-attP18	10sLED	AirLED	Arena2	Cam1	20190707T110703	6	88.4672	12.2271	12.4766	13.7161	10.7373	15.8766	13.9532	12.0606	11.2771	13.3974	13.3759	10.5415	11.4094	11.7797	10.4446	10.705	11.0988	10.7601	9.74771	10.4119	10.5741	10.6879	10.7934	8.78804	9.6538	9.85675	11.0581	9.93706	9.9671	9.78506	44.3874	82.1119	104.962	90.6966	84.3734	78.8823	66.2569	58.2181	44.9456	49.4061	46.2035
DeltaAnglefroPreviousFrame	MB011C	20xUAS-CsChrimson-mVenus-attP18	10sLED	AirLED	Arena2	Cam1	20190803T083850	6	104.856	67.2634	70.6509	74.5675	78.7523	68.6258	72.2134	75.2176	76.3825	84.9586	73.1287	70.1077	74.4058	80.7334	69.7961	67.799	78.4389	77.9316	81.7493	73.9628	81.0988	74.0068	78.6692	73.096	76.4382	83.6445	72.2383	77.7281	69.7042	78.2284	147.122	157.541	138.38	124.724	99.7121	97.1614	87.1589	88.6364	78.2666	73.3405	73.3647
DeltaAnglefroPreviousFrame	MB011C	20xUAS-CsChrimson-mVenus-attP18	10sLED	AirLED	olfactoryArena1	Cam0	20190707T104807	6	97.2531	125.025	123.335	134.608	136.332	112.33	117.216	125.26	138.234	132.02	119.358	111.753	112.072	115.505	116.403	117.805	117.744	110.278	118.09	135.116	123.522	139.648	131.819	125.869	125.483	116.921	111.913	124.635	142.968	122.382	114.822	190.01	217.579	172.494	149.374	150.974	129.557	132.297	130.177	119.263	113.601
DeltaAnglefroPreviousFrame	MB011C	20xUAS-CsChrimson-mVenus-attP18	10sLED	AirLED	olfactoryArena1	Cam0	20190707T105742	6	80.2304	69.6134	67.9894	78.6603	67.7232	70.0716	73.2173	67.0413	81.1745	68.4038	70.5278	81.2474	66.2218	63.4306	81.2792	73.8044	71.6712	69.6734	74.8288	64.0849	68.2644	78.3073	75.9563	74.7722	74.0303	76.5129	82.8793	71.9742	76.4641	80.1345	82.0523	178.471	151.624	145.116	127.15	107.028	112.61	101.307	94.0935	93.0732	80.799
DeltaAnglefroPreviousFrame	MB011C	20xUAS-CsChrimson-mVenus-attP18	10sLED	AirLED	olfactoryArena1	Cam0	20190707T111027	6	56.5316	27.5943	26.9625	27.6218	33.4155	37.4053	34.5724	29.54	30.6242	31.2096	27.1613	24.9156	24.3013	28.3216	32.6203	31.2951	30.0487	27.978	30.3439	28.8369	33.3903	35.8515	31.9043	37.6745	33.6387	30.8505	35.5324	33.7466	37.8096	34.9171	38.3383	108.679	128.423	154.311	118.666	102.923	79.3921	76.5818	71.0563	66.6138	63.7033
DeltaAnglefroPreviousFrame	MB011C	20xUAS-CsChrimson-mVenus-attP18	10sLED	AirLED	olfactoryArena1	Cam0	20190713T101455	6	75.6274	76.9696	90.2437	80.624	79.5686	89.0654	98.9778	96.0208	96.3569	84.1197	87.8153	93.4305	86.3369	92.124	103.551	96.0966	102.036	95.6067	89.0232	93.7607	89.4579	94.1235	86.3604	97.0502	92.0711	111.229	116.384	96.4073	96.9141	96.2408	99.9437	218.256	193.544	157.861	129.098	97.2425	98.1178	88.2282	77.2996	85.3189	85.6006
DeltaAnglefroPreviousFrame	MB011C	20xUAS-CsChrimson-mVenus-attP18	10sLED	AirLED	olfactoryArena1	Cam0	20190803T084129	6	78.4467	85.6146	71.2795	89.88	74.7418	81.1379	86.0336	72.3826	90.3066	73.8366	72.4441	79.3114	71.8233	73.4453	96.5362	87.6213	75.9155	87.3692	83.0498	82.6371	95.7409	89.6061	87.7933	107.679	99.0512	94.0283	119.828	106.55	92.1196	101.617	102.8	199.888	200.609	137.24	124.004	99.1701	78.3922	79.0842	81.0583	89.8276	99.6768
DeltaAnglefroPreviousFrame	MB011C	20xUAS-CsChrimson-mVenus-attP18	10sLED	AirLED	olfactoryArena1	Cam0	20200225T134438	6	82.5386	68.1636	65.6907	64.2534	54.5443	61.8858	61.3123	65.9817	66.2042	76.4047	73.7458	68.0411	58.4755	59.4111	64.9897	64.639	61.3928	61.6461	77.1161	77.1213	74.0979	75.4184	65.4811	67.4432	71.4839	66.842	80.898	69.6911	63.8939	67.1918	61.7112	197.613	166.018	156.505	159.918	123.028	104.958	113.244	105.226	90.6407	83.7354
DeltaAnglefroPreviousFrame	MB011C	20xUAS-CsChrimson-mVenus-attP18	10sLED	AirLED	olfactoryArena1	Cam1	20190707T104807	6	98.5748	94.9319	100.807	88.4679	95.8456	98.5035	108.068	106.885	96.2084	97.9268	98.4894	96.4182	100.662	101.236	93.7027	92.4299	105.587	102.503	108.328	105.158	100.225	99.8934	113.334	98.2827	90.122	101.731	94.4362	91.8834	105.193	98.338	172.677	203.923	189.373	167.67	155.031	138.552	119.423	120.766	104.187	98.7737	107.652
DeltaAnglefroPreviousFrame	MB011C	20xUAS-CsChrimson-mVenus-attP18	10sLED	AirLED	olfactoryArena1	Cam1	20190707T105742	6	117.167	47.5003	52.0066	46.7134	45.021	42.119	42.089	35.4379	47.5473	45.1019	50.7442	52.75	44.8066	44.3297	47.9461	43.2662	48.4653	47.1064	39.6383	38.753	40.5567	46.4402	39.2878	42.3081	41.2556	45.4783	45.8799	35.8748	40.8197	43.2663	113.105	131.11	157.986	156.108	113.267	95.4184	98.2192	81.9696	88.573	80.4381	81.6461
DeltaAnglefroPreviousFrame	MB011C	20xUAS-CsChrimson-mVenus-attP18	10sLED	AirLED	olfactoryArena1	Cam1	20190707T111027	6	103.165	25.5425	27.7277	26.9059	26.6988	25.6081	25.2142	26.1719	27.332	27.332	29.4963	25.2558	28.162	29.7561	24.2714	26.2116	21.3602	19.4765	19.6198	24.4942	26.8256	26.566	20.5244	24.4042	20.3459	33.2895	25.6955	21.7138	27.4004	20.0713	84.0099	109.351	131.548	117.628	85.7657	91.6476	89.7169	68.8018	74.3381	74.9695	72.2846
DeltaAnglefroPreviousFrame	MB011C	20xUAS-CsChrimson-mVenus-attP18	10sLED	AirLED	olfactoryArena1	Cam1	20190713T101455	6	79.2005	81.7928	83.5367	98.6927	86.951	84.8216	89.2199	83.927	93.4735	94.4565	87.6121	86.422	85.0009	85.133	87.6558	92.9492	91.1568	92.66	104.109	100.801	94.7129	95.0939	92.4646	97.8311	97.2041	86.5506	97.4112	103.662	92.4706	97.441	204.963	188.116	162.611	145.93	115.719	91.0233	79.3717	78.4904	80.2563	74.1377	77.0752
DeltaAnglefroPreviousFrame	MB011C	20xUAS-CsChrimson-mVenus-attP18	10sLED	AirLED	olfactoryArena1	Cam1	20190803T084129	6	91.564	77.8775	87.2941	94.8665	87.2507	90.7404	80.6757	90.5956	80.6138	78.5632	95.5483	91.7082	100.744	89.0508	83.3184	80.5267	92.4046	93.9566	90.1785	93.3954	96.4667	86.7528	95.7711	97.6091	98.7406	85.5904	91.1896	89.4593	90.9401	88.1239	205.637	184.067	179.908	139.873	122.67	94.467	103.225	86.1812	92.9144	85.6949	93.386
DeltaAnglefroPreviousFrame	MB011C	20xUAS-CsChrimson-mVenus-attP18	10sLED	AirLED	olfactoryArena1	Cam1	20200225T134438	6	73.3688	81.0283	84.9838	68.1464	89.8113	98.3584	94.7143	101.029	83.0334	87.3075	91.3541	74.7792	80.6716	98.8397	90.9817	88.8142	106.248	89.298	86.0603	76.1815	81.3725	89.9812	85.6543	71.3492	72.2683	71.8333	70.4999	76.1179	78.3654	86.1308	198.486	166.03	165.089	148.794	132.687	119.109	99.2299	98.9801	100.042	99.0101	99.5214
DeltaAnglefroPreviousFrame	MB011C	20xUAS-CsChrimson-mVenus-attP18	10sLED	AirLED	Arena2	Cam1	20190713T100917	5	85.7031	61.2912	70.5348	75.8833	63.9264	60.1425	76.863	69.1252	80.7286	84.9784	72.2149	70.2611	67.5847	79.7421	83.6548	83.9869	79.7694	92.715	69.0106	63.3277	72.8338	67.095	84.7167	72.1784	76.5457	70.3587	63.1578	73.6526	79.1574	74.8255	157.398	134.433	111.484	107.616	88.5312	81.6885	61.7206	55.6401	48.5585	41.6826	46.8595
DeltaAnglefroPreviousFrame	MB011C	20xUAS-CsChrimson-mVenus-attP18	10sLED	AirLED	Arena2	Cam1	20200225T134105	5	107.749	93.1792	98.1575	93.475	102.042	96.9285	87.3765	95.4692	83.4248	90.3904	81.1485	85.8411	96.2102	95.8706	85.474	107.537	99.1138	89.8871	95.3695	97.9591	112.361	95.6378	105.725	95.9735	94.2161	96.7498	94.3958	94.9959	77.8559	76.836	186.105	159.607	160.38	173.904	143.802	136.445	150.78	125.493	116.424	123.57	110.454
DeltaAnglefroPreviousFrame	MB011C	20xUAS-CsChrimson-mVenus-attP18	10sLED	AirLED	Arena2	Cam0	20190707T104343	4	124.076	124.095	102.924	139.314	124.472	129.045	138.47	119.384	134.553	151.836	153.697	129.82	134.993	164.796	154.616	152.89	159.342	136.301	130.635	165.251	135.901	126.582	123.593	151.718	155.526	151.427	150.411	164.259	173.391	141.335	143.329	169.8	200.034	220.93	235.244	233.162	190.256	199.283	192.012	197.12	151.482
WalkingDistanceFromPreviousFrame	MB011C	20xUAS-CsChrimson-mVenus-attP18	10sLED	AirLED	Arena2	Cam0	20190707T105421	6	0.774023	0.963268	0.858567	1.01262	0.791838	0.838621	0.936776	0.917336	0.853924	0.875009	0.913604	0.818622	0.755464	0.787453	0.80506	0.750634	0.765747	0.797634	0.787386	0.924841	0.787298	0.838446	0.716134	0.775459	0.697429	0.650385	0.682826	0.695744	0.680487	0.692685	0.730541	0.866188	1.27393	1.50202	1.69185	1.68933	1.45208	1.35294	1.36173	1.37252	1.30813
WalkingDistanceFromPreviousFrame	MB011C	20xUAS-CsChrimson-mVenus-attP18	10sLED	AirLED	Arena2	Cam0	20190707T110703	6	0.539108	0.634555	0.553663	0.640243	0.709129	0.557402	0.455666	0.644389	0.647453	0.592116	0.567291	0.575543	0.553041	0.511432	0.412886	0.50909	0.484066	0.463794	0.464496	0.444314	0.628664	0.594355	0.640829	0.53556	0.491563	0.546773	0.540238	0.583435	0.728253	0.516776	0.627633	1.00777	1.37438	1.35751	1.16686	1.23875	1.16726	1.134	1.00478	1.04881	1.02691
WalkingDistanceFromPreviousFrame	MB011C	20xUAS-CsChrimson-mVenus-attP18	10sLED	AirLED	Arena2	Cam0	20190713T100917	6	1.56225	1.65274	1.73996	1.62437	1.49673	1.51037	1.293	1.62722	1.71045	1.44815	1.34834	1.66568	1.65905	1.72515	1.52779	1.30536	1.39456	1.33871	1.24688	1.32705	1.33874	1.19979	1.4479	1.50668	1.42998	1.41551	1.1843	1.43526	1.42283	1.36039	1.5153	1.51227	1.94104	1.93559	1.73051	1.36828	1.13452	1.0557	0.997233	1.07295	1.10465
WalkingDistanceFromPreviousFrame	MB011C	20xUAS-CsChrimson-mVenus-attP18	10sLED	AirLED	Arena2	Cam0	20190803T083850	6	0.601588	0.902039	0.799214	0.670928	0.639598	0.790734	0.744034	0.73511	0.637285	0.769129	0.788206	0.800584	0.784314	0.85419	0.819362	0.834623	0.887785	0.838583	0.83724	0.881163	0.865908	0.881342	0.80988	0.890191	0.957304	0.968658	0.823334	0.918351	0.874347	0.879549	0.912158	1.20066	1.43613	1.65566	1.78026	1.57846	1.5392	1.42019	1.43321	1.47414	1.37056
WalkingDistanceFromPreviousFrame	MB011C	20xUAS-CsChrimson-mVenus-attP18	10sLED	AirLED	Arena2	Cam0	20200225T134105	6	1.02166	1.16416	1.25174	1.30211	1.27869	1.15681	1.25029	1.28465	1.19871	1.16393	1.27398	1.06874	1.16051	1.1753	1.27448	1.26714	1.22067	1.18014	1.10317	1.09367	1.1585	1.21867	1.16998	1.16618	1.08148	1.10992	1.15439	1.09775	1.25173	1.14342	1.10313	1.54754	1.72774	1.89264	1.9555	1.97718	1.917	1.86646	1.6654	1.49717	1.46419
WalkingDistanceFromPreviousFrame	MB011C	20xUAS-CsChrimson-mVenus-attP18	10sLED	AirLED	Arena2	Cam1	20190707T104343	6	1.30996	1.37977	1.37408	1.48993	1.45446	1.46873	1.47052	1.25741	1.31093	1.35167	1.40511	1.29561	1.19482	1.23071	1.11617	1.16277	1.22153	1.12157	1.2155	1.2435	1.44323	1.42739	1.31494	1.23249	1.23605	1.27028	1.32455	1.24712	1.22326	1.28344	1.66557	1.80682	2.19738	2.10419	1.97946	1.82449	1.90523	1.74483	1.4933	1.56421	1.57133
WalkingDistanceFromPreviousFrame	MB011C	20xUAS-CsChrimson-mVenus-attP18	10sLED	AirLED	Arena2	Cam1	20190707T105421	6	0.329792	0.392575	0.36171	0.327462	0.370323	0.349158	0.422833	0.447924	0.369364	0.38087	0.415367	0.423215	0.368088	0.346003	0.308524	0.349279	0.416094	0.421132	0.464463	0.442261	0.419407	0.41671	0.347367	0.33567	0.332517	0.362197	0.339248	0.363871	0.387602	0.383314	0.554609	1.17042	1.34847	1.43857	1.36408	1.18961	1.10474	1.26527	1.22015	1.13619	1.04019
WalkingDistanceFromPreviousFrame	MB011C	20xUAS-CsChrimson-mVenus-attP18	10sLED	AirLED	Arena2	Cam1	20190707T110703	6	0.163708	0.201305	0.189649	0.156437	0.157996	0.174657	0.239487	0.195436	0.175563	0.184335	0.177409	0.185893	0.154156	0.15788	0.187762	0.187124	0.140852	0.144869	0.123764	0.129471	0.150076	0.111278	0.128894	0.161222	0.123228	0.118627	0.115623	0.117992	0.148487	0.131558	0.274686	0.645593	0.890179	0.947875	0.834532	0.740284	0.706272	0.675224	0.603791	0.564669	0.563546
WalkingDistanceFromPreviousFrame	MB011C	20xUAS-CsChrimson-mVenus-attP18	10sLED	AirLED	Arena2	Cam1	20190803T083850	6	1.11365	1.21414	1.11496	1.10732	1.26427	1.3504	1.20346	1.10465	1.17295	1.2938	1.16767	1.10706	1.07729	1.13198	1.06285	0.997734	1.09747	1.061	1.11015	1.10666	1.22647	1.26216	1.14037	1.13491	1.12501	1.25067	1.12351	1.15293	1.14348	1.15482	1.3808	1.63392	1.96329	2.05123	1.99853	1.89143	1.81391	1.72158	1.69663	1.66789	1.67391
WalkingDistanceFromPreviousFrame	MB011C	20xUAS-CsChrimson-mVenus-attP18	10sLED	AirLED	olfactoryArena1	Cam0	20190707T104807	6	1.84987	2.16067	2.10955	2.07048	2.32733	2.11502	2.11423	1.96036	2.04323	1.78776	1.99787	2.09514	2.12911	2.20642	2.26943	2.29631	2.3296	2.11836	1.97675	2.09459	2.03653	2.08679	1.93943	2.06843	2.1627	2.165	2.29847	2.28604	2.25358	1.99871	1.89766	2.5138	2.407	2.56795	2.48592	2.67341	2.27694	2.25164	2.25381	2.07539	2.27355
WalkingDistanceFromPreviousFrame	MB011C	20xUAS-CsChrimson-mVenus-attP18	10sLED	AirLED	olfactoryArena1	Cam0	20190707T105742	6	1.0218	1.16526	1.20265	1.20477	1.1665	1.15428	1.14742	1.15354	1.37711	1.11153	1.19177	1.26941	1.11387	1.12406	1.08981	1.1496	1.25686	1.22103	1.1561	1.20443	1.20894	1.18168	1.06561	1.13744	0.953373	1.11221	1.31601	1.23039	1.11739	1.0652	1.21967	1.6183	1.6845	1.90444	1.96527	1.8748	1.75584	1.70149	1.68376	1.8265	1.78127
WalkingDistanceFromPreviousFrame	MB011C	20xUAS-CsChrimson-mVenus-attP18	10sLED	AirLED	olfactoryArena1	Cam0	20190707T111027	6	0.384578	0.478955	0.483471	0.482317	0.463999	0.373515	0.491634	0.404309	0.434687	0.477267	0.470491	0.504957	0.472098	0.506504	0.535461	0.494589	0.499397	0.503427	0.582689	0.56733	0.535819	0.530071	0.54711	0.54211	0.513437	0.465703	0.530049	0.498448	0.514088	0.486921	0.462126	0.762673	1.00956	1.20557	1.27376	1.22168	1.10172	0.936494	0.954897	0.910966	0.897771
WalkingDistanceFromPreviousFrame	MB011C	20xUAS-CsChrimson-mVenus-attP18	10sLED	AirLED	olfactoryArena1	Cam0	20190713T101455	6	1.37969	1.47555	1.58659	1.79237	1.64305	1.48364	1.61024	1.50553	1.58981	1.59214	1.56518	1.38583	1.36882	1.42284	1.62449	1.79795	1.69481	1.73303	1.48123	1.6911	1.81051	1.6139	1.84336	2.11122	2.185	1.95321	2.07642	2.35603	2.27276	2.26095	2.07798	2.3729	2.70759	2.87596	2.76466	2.59657	2.22983	2.17319	2.17866	1.89378	1.78675
WalkingDistanceFromPreviousFrame	MB011C	20xUAS-CsChrimson-mVenus-attP18	10sLED	AirLED	olfactoryArena1	Cam0	20190803T084129	6	1.57582	1.65493	1.61709	1.70779	1.79791	1.48739	1.78717	1.78494	1.84841	1.85456	1.65267	1.73143	1.87478	1.62446	1.43604	1.68677	1.63735	1.65809	1.73726	1.79605	1.95457	2.07544	2.0481	2.13283	1.77499	1.56971	1.77029	1.90327	1.93663	2.09978	1.9781	2.07194	2.15355	3.00576	3.09766	2.719	2.45365	2.11783	2.00723	1.7926	1.97305
WalkingDistanceFromPreviousFrame	MB011C	20xUAS-CsChrimson-mVenus-attP18	10sLED	AirLED	olfactoryArena1	Cam0	20200225T134438	6	0.753315	1.00035	0.802207	0.882505	0.901683	0.869091	0.965362	0.987212	0.994296	1.07489	0.98683	0.984793	0.944935	0.882028	0.811596	0.840137	0.808505	0.69268	0.741476	0.864129	0.834747	0.847138	0.778368	0.804498	0.828918	0.824047	0.885657	0.869533	0.854651	0.928504	0.757351	1.44929	2.05547	2.03691	1.99007	2.0049	1.75054	1.81329	1.74365	1.81251	1.92924
WalkingDistanceFromPreviousFrame	MB011C	20xUAS-CsChrimson-mVenus-attP18	10sLED	AirLED	olfactoryArena1	Cam1	20190707T104807	6	0.92507	1.23704	1.19768	1.15907	1.24213	1.23652	1.32395	1.43963	1.38164	1.30728	1.4616	1.46943	1.30012	1.24392	1.25394	1.21047	1.17175	1.36007	1.3155	1.33186	1.33707	1.19817	1.24703	1.33432	1.38231	1.374	1.24781	1.18961	1.3737	1.43173	1.60704	1.82546	1.9354	1.9745	2.01978	1.81823	1.74439	1.6719	1.88098	1.75101	1.77687
WalkingDistanceFromPreviousFrame	MB011C	20xUAS-CsChrimson-mVenus-attP18	10sLED	AirLED	olfactoryArena1	Cam1	20190707T105742	6	0.420066	0.469933	0.528801	0.510185	0.490209	0.517581	0.490138	0.371399	0.458398	0.512823	0.548561	0.498869	0.467454	0.518615	0.411582	0.413514	0.47269	0.418828	0.401686	0.409173	0.408186	0.441992	0.389292	0.443538	0.457057	0.44989	0.486518	0.387038	0.420715	0.454645	0.712284	0.893505	0.96865	1.17981	1.12742	1.10191	1.06821	0.94263	0.951319	0.913202	0.962635
WalkingDistanceFromPreviousFrame	MB011C	20xUAS-CsChrimson-mVenus-attP18	10sLED	AirLED	olfactoryArena1	Cam1	20190707T111027	6	0.207432	0.245684	0.24219	0.248672	0.278735	0.29106	0.27665	0.244931	0.260259	0.258973	0.309966	0.319395	0.291132	0.342826	0.302193	0.253853	0.286637	0.273973	0.23638	0.245286	0.295778	0.286296	0.196354	0.207388	0.20725	0.292722	0.272646	0.242124	0.275803	0.289635	0.46737	0.742106	0.937461	0.945629	0.859087	0.827614	0.725268	0.723301	0.785046	0.807646	0.920816
WalkingDistanceFromPreviousFrame	MB011C	20xUAS-CsChrimson-mVenus-attP18	10sLED	AirLED	olfactoryArena1	Cam1	20190713T101455	6	1.01078	1.14091	1.18363	1.32773	1.32169	1.32313	1.40242	1.3004	1.25441	1.4708	1.36012	1.22512	1.18189	1.23074	1.23818	1.15714	1.38258	1.40999	1.4524	1.54919	1.32803	1.30931	1.34188	1.45513	1.44181	1.45411	1.53368	1.69345	1.50709	1.39166	1.82108	2.07135	2.11265	2.04194	1.7739	1.75339	1.38929	1.2895	1.27775	1.19594	1.29809
WalkingDistanceFromPreviousFrame	MB011C	20xUAS-CsChrimson-mVenus-attP18	10sLED	AirLED	olfactoryArena1	Cam1	20190803T084129	6	1.56356	1.65571	1.64009	1.61987	1.4727	1.45423	1.50924	1.56853	1.51907	1.44536	1.43995	1.6065	1.64291	1.72033	1.60109	1.54849	1.54605	1.61847	1.43185	1.5906	1.62981	1.41581	1.58882	1.47218	1.61394	1.62778	1.67879	1.75923	1.79716	1.78471	2.08408	2.19438	2.66891	2.5352	2.34742	2.18807	2.06948	1.88383	1.57386	1.46829	1.58133
WalkingDistanceFromPreviousFrame	MB011C	20xUAS-CsChrimson-mVenus-attP18	10sLED	AirLED	olfactoryArena1	Cam1	20200225T134438	6	1.25906	1.43306	1.51589	1.29555	1.29712	1.76028	1.72218	1.55442	1.41203	1.30529	1.60266	1.38536	1.33091	1.57801	1.14236	1.31815	1.25829	1.35111	1.38713	1.27282	1.28998	1.4548	1.45516	1.21215	1.0487	1.1382	1.17095	1.12389	1.09574	1.19924	1.79628	2.00611	1.99677	2.20748	1.9708	1.7448	1.65247	1.61416	1.66535	1.59325	1.57249
WalkingDistanceFromPreviousFrame	MB011C	20xUAS-CsChrimson-mVenus-attP18	10sLED	AirLED	Arena2	Cam1	20190713T100917	5	0.879996	0.939023	1.07434	0.983972	0.983872	0.955772	0.915389	0.894963	0.858737	1.01834	0.890059	1.07463	0.981393	0.968217	0.875408	1.10243	0.883351	0.96062	1.06742	0.982022	1.05158	1.02606	1.06483	0.924083	0.87837	1.13755	1.01831	1.08748	1.21957	1.13573	1.35034	1.3822	1.45217	1.38798	1.17182	1.08795	1.04973	0.86956	0.85895	0.775702	0.736758
WalkingDistanceFromPreviousFrame	MB011C	20xUAS-CsChrimson-mVenus-attP18	10sLED	AirLED	Arena2	Cam1	20200225T134105	5	1.07193	1.12537	1.25984	1.2407	1.28403	1.25727	1.17309	1.22416	1.23702	1.28979	1.23482	1.24333	1.21629	1.2043	1.23502	1.282	1.19786	1.22386	1.16642	1.14228	1.08655	1.3326	1.31552	1.25333	1.22477	0.999729	1.18965	1.08017	1.0002	0.903985	1.51875	1.54325	1.70336	1.82784	1.80946	1.67411	1.78231	1.68769	1.50552	1.67158	1.55648
WalkingDistanceFromPreviousFrame	MB011C	20xUAS-CsChrimson-mVenus-attP18	10sLED	AirLED	Arena2	Cam0	20190707T104343	4	1.95713	2.09262	2.09735	2.32909	2.08863	2.27841	2.24237	2.49525	2.50466	2.05369	2.15501	1.9993	1.87806	2.00328	2.04162	1.95657	1.94423	1.78477	1.78078	1.77854	1.87617	1.96088	2.14806	2.07243	1.94289	1.95846	1.76379	1.97072	1.91688	1.89621	2.32312	2.07769	2.01075	2.30674	2.89146	2.76906	2.58924	2.24593	2.1674	1.89875	2.05736
revisit-10mmOut3mmIn-15s	MB011C	20xUAS-CsChrimson-mVenus-attP18	10sLED	AirLED	Arena2	Cam0	20190707T105421	6	0.0676259	0.0765631	0.0703583	0.0901699	0.100501	0.106738	0.102257	0.0932709	0.0814613	0.0981474	0.0933057	0.101511	0.112643	0.0994883	0.0980591	0.121627	0.111191	0.123981	0.155793	0.15944	0.19219	0.188307	0.18928	0.192435	0.208009	0.226404	0.184199	0.166175	0.163819	0.145384	0.138659	0.149379	0.16113	0.157648	0.158157	0.14484	0.153596	0.1645	0.144288	0.157788	0.169214
revisit-10mmOut3mmIn-15s	MB011C	20xUAS-CsChrimson-mVenus-attP18	10sLED	AirLED	Arena2	Cam0	20190707T110703	6	0.0576911	0.0805777	0.0951221	0.100864	0.102026	0.0951435	0.101259	0.107398	0.107028	0.105924	0.104157	0.11386	0.106335	0.106165	0.108186	0.107625	0.121722	0.106624	0.10893	0.109188	0.0988746	0.122052	0.120825	0.132413	0.131073	0.114408	0.11329	0.124596	0.12775	0.120395	0.134283	0.128583	0.120348	0.127287	0.129646	0.10818	0.090633	0.0727819	0.0577065	0.0514688	0.0823979
revisit-10mmOut3mmIn-15s	MB011C	20xUAS-CsChrimson-mVenus-attP18	10sLED	AirLED	Arena2	Cam0	20190713T100917	6	0.103697	0.1009	0.0870727	0.0850427	0.110049	0.11523	0.140861	0.136946	0.111422	0.0971639	0.100194	0.0863054	0.0749276	0.0665598	0.0992521	0.0923077	0.0897287	0.100947	0.0917313	0.0971899	0.119192	0.112374	0.0938131	0.0984848	0.144444	0.143056	0.152778	0.15	0.126389	0.126389	0.0929688	0.0940171	0.11764	0.125955	0.147222	0.138782	0.11015	0.1125	0.121835	0.111573	0.1
revisit-10mmOut3mmIn-15s	MB011C	20xUAS-CsChrimson-mVenus-attP18	10sLED	AirLED	Arena2	Cam0	20190803T083850	6	0.120311	0.126465	0.105556	0.0913458	0.0992063	0.0992063	0.0952381	0.101587	0.0928571	0.101587	0.101587	0.100794	0.134127	0.130952	0.123916	0.125724	0.117613	0.114286	0.123016	0.115189	0.119147	0.133333	0.130368	0.147619	0.145238	0.145238	0.152381	0.157937	0.165953	0.163583	0.173016	0.195238	0.196825	0.176647	0.157993	0.140552	0.134295	0.131746	0.144452	0.12788	0.109767
revisit-10mmOut3mmIn-15s	MB011C	20xUAS-CsChrimson-mVenus-attP18	10sLED	AirLED	Arena2	Cam0	20200225T134105	6	0.0977327	0.097619	0.0918208	0.0595238	0.0666667	0.0869048	0.075	0.107143	0.12619	0.12619	0.138095	0.14881	0.172619	0.178571	0.17619	0.184524	0.195238	0.215982	0.240476	0.215819	0.179805	0.170238	0.172619	0.17279	0.161168	0.183333	0.17381	0.163095	0.15119	0.113095	0.128657	0.110714	0.122619	0.138224	0.130045	0.134978	0.0869048	0.0690476	0.0953923	0.105952	0.0833333
revisit-10mmOut3mmIn-15s	MB011C	20xUAS-CsChrimson-mVenus-attP18	10sLED	AirLED	Arena2	Cam1	20190707T104343	6	0.0920454	0.0934157	0.0822654	0.0846179	0.110806	0.122655	0.117975	0.0989899	0.0986461	0.0934076	0.088925	0.101888	0.103395	0.0944749	0.117779	0.131052	0.13866	0.122567	0.124775	0.139626	0.133964	0.152486	0.164526	0.141467	0.155278	0.180195	0.194076	0.191744	0.190801	0.187322	0.167331	0.160868	0.165359	0.149443	0.171605	0.177073	0.153381	0.116621	0.107504	0.107644	0.0930709
revisit-10mmOut3mmIn-15s	MB011C	20xUAS-CsChrimson-mVenus-attP18	10sLED	AirLED	Arena2	Cam1	20190707T105421	6	0.0540643	0.0697691	0.0761183	0.0761183	0.062482	0.0655123	0.0753608	0.065404	0.0537879	0.0537879	0.0577922	0.0609668	0.0609668	0.073088	0.0644634	0.0684905	0.0704545	0.0773419	0.1	0.105303	0.103788	0.124031	0.147245	0.142059	0.138167	0.128657	0.105808	0.122049	0.126784	0.121295	0.12027	0.135396	0.119894	0.106329	0.0849177	0.0707798	0.0633869	0.0601674	0.0749689	0.0800524	0.0609979
revisit-10mmOut3mmIn-15s	MB011C	20xUAS-CsChrimson-mVenus-attP18	10sLED	AirLED	Arena2	Cam1	20190707T110703	6	0.0212467	0.00952381	0.00793651	0.00793651	0.00793651	0.00793651	0.00793651	0.0102092	0.0155123	0.00869408	0.00793651	0.00793651	0.0123662	0.0242424	0.0242424	0.0171815	0.0157457	0.0159091	0.0159091	0.0159091	0.0159091	0.0159091	0.0159091	0.0208297	0.0238456	0.0238456	0.0238456	0.0238456	0.0238456	0.0238456	0.0328932	0.0437837	0.0628226	0.0530867	0.0484754	0.031746	0.0398166	0.03096	0.0222222	0.0349206	0.0357143
revisit-10mmOut3mmIn-15s	MB011C	20xUAS-CsChrimson-mVenus-attP18	10sLED	AirLED	Arena2	Cam1	20190803T083850	6	0.103831	0.0977705	0.103334	0.0868539	0.0900543	0.110191	0.100432	0.111458	0.11861	0.136452	0.134454	0.135949	0.128667	0.129361	0.13125	0.135023	0.143333	0.12875	0.119728	0.14125	0.148072	0.14552	0.134901	0.151329	0.177009	0.185509	0.180186	0.169081	0.162766	0.167646	0.157791	0.144933	0.151231	0.176972	0.152056	0.162602	0.179837	0.173889	0.154806	0.138241	0.128859
revisit-10mmOut3mmIn-15s	MB011C	20xUAS-CsChrimson-mVenus-attP18	10sLED	AirLED	olfactoryArena1	Cam0	20190707T104807	6	0.167375	0.169873	0.148906	0.144284	0.158775	0.162862	0.181297	0.178058	0.17496	0.191031	0.233166	0.217139	0.22566	0.225406	0.224185	0.2408	0.23507	0.232763	0.236996	0.233124	0.245713	0.222382	0.244994	0.246636	0.25304	0.263301	0.265621	0.247708	0.234712	0.236982	0.222638	0.194728	0.163537	0.173825	0.207062	0.237023	0.232603	0.207861	0.205163	0.161471	0.136353
revisit-10mmOut3mmIn-15s	MB011C	20xUAS-CsChrimson-mVenus-attP18	10sLED	AirLED	olfactoryArena1	Cam0	20190707T105742	6	0.0574388	0.0610703	0.0686819	0.0791803	0.0724771	0.0541897	0.0550177	0.0773675	0.0391068	0.0236111	0.0369009	0.0389706	0.0658292	0.0780229	0.083144	0.096487	0.10338	0.100599	0.126319	0.130828	0.125166	0.107693	0.10352	0.105472	0.0991862	0.0822032	0.0926838	0.135577	0.130067	0.128829	0.12075	0.143273	0.15447	0.165049	0.150477	0.160246	0.166578	0.175455	0.175211	0.168253	0.151133
revisit-10mmOut3mmIn-15s	MB011C	20xUAS-CsChrimson-mVenus-attP18	10sLED	AirLED	olfactoryArena1	Cam0	20190707T111027	6	0.0368557	0.0288671	0.0288178	0.0278322	0.0283224	0.0391416	0.0381264	0.0323875	0.0349673	0.0496732	0.0602397	0.0566449	0.0557425	0.0578023	0.0605801	0.0623162	0.0627798	0.0811398	0.0845316	0.0686819	0.0813468	0.0840861	0.0681373	0.058878	0.0719577	0.0820261	0.0653595	0.0496187	0.0422113	0.0283224	0.0283224	0.0320261	0.0442301	0.0348039	0.0384532	0.037037	0.037037	0.037037	0.0324074	0.0435185	0.0453704
revisit-10mmOut3mmIn-15s	MB011C	20xUAS-CsChrimson-mVenus-attP18	10sLED	AirLED	olfactoryArena1	Cam0	20190713T101455	6	0.106752	0.107927	0.11126	0.105	0.111394	0.0998279	0.0873141	0.070068	0.0838606	0.0784282	0.0838889	0.112121	0.124603	0.156667	0.155556	0.139113	0.133333	0.163632	0.13786	0.142222	0.175556	0.173333	0.177778	0.194609	0.194638	0.176667	0.168098	0.182543	0.202943	0.203333	0.192222	0.214444	0.222222	0.161268	0.18	0.142222	0.124444	0.1	0.13	0.131111	0.132222
revisit-10mmOut3mmIn-15s	MB011C	20xUAS-CsChrimson-mVenus-attP18	10sLED	AirLED	olfactoryArena1	Cam0	20190803T084129	6	0.14684	0.117881	0.0864021	0.0664021	0.0738095	0.0608466	0.0810847	0.0846561	0.0885913	0.101554	0.135582	0.135372	0.132512	0.143122	0.128517	0.127739	0.142764	0.15291	0.194716	0.20426	0.205214	0.231679	0.204772	0.167931	0.188955	0.158823	0.154484	0.142692	0.150463	0.173148	0.179483	0.162037	0.186964	0.166769	0.14202	0.126852	0.115972	0.145899	0.138988	0.0962121	0.130556
revisit-10mmOut3mmIn-15s	MB011C	20xUAS-CsChrimson-mVenus-attP18	10sLED	AirLED	olfactoryArena1	Cam0	20200225T134438	6	0.0925647	0.08787	0.0894522	0.07705	0.0937302	0.0898413	0.103968	0.0912698	0.0951587	0.130213	0.155041	0.180393	0.165873	0.135858	0.139603	0.140635	0.126111	0.140079	0.133571	0.135554	0.15607	0.1716	0.2138	0.202302	0.232302	0.233686	0.22381	0.225397	0.227698	0.26127	0.261587	0.282622	0.273889	0.247796	0.183277	0.182785	0.199609	0.220861	0.190803	0.172778	0.174914
revisit-10mmOut3mmIn-15s	MB011C	20xUAS-CsChrimson-mVenus-attP18	10sLED	AirLED	olfactoryArena1	Cam1	20190707T104807	6	0.134891	0.134375	0.1375	0.132292	0.166667	0.182292	0.188542	0.198958	0.202083	0.164583	0.159375	0.160417	0.18125	0.202083	0.171875	0.1375	0.129167	0.142708	0.168219	0.191667	0.218881	0.228839	0.244792	0.2375	0.210417	0.222805	0.208432	0.173958	0.185417	0.219474	0.241667	0.208333	0.173107	0.172255	0.191667	0.219119	0.211458	0.194792	0.188542	0.165625	0.145833
revisit-10mmOut3mmIn-15s	MB011C	20xUAS-CsChrimson-mVenus-attP18	10sLED	AirLED	olfactoryArena1	Cam1	20190707T105742	6	0.0274929	0.025	0.0208333	0.0208333	0.0229167	0.03125	0.0416667	0.0364583	0.0291667	0.0302083	0.0416667	0.040625	0.0708333	0.0875	0.101042	0.1	0.100301	0.0885417	0.0822917	0.0835299	0.075	0.0854167	0.0875	0.0864583	0.0857311	0.0802083	0.0916667	0.0822917	0.0802083	0.090625	0.109519	0.0969864	0.09375	0.0993536	0.0857508	0.066837	0.0949948	0.127083	0.126042	0.117708	0.0947917
revisit-10mmOut3mmIn-15s	MB011C	20xUAS-CsChrimson-mVenus-attP18	10sLED	AirLED	olfactoryArena1	Cam1	20190707T111027	6	0.00932401	0.0239583	0.03125	0.03125	0.0395833	0.0416667	0.0417977	0.040625	0.0354167	0.0416667	0.0385417	0.03125	0.0239583	0.03125	0.0208333	0.0208333	0.0208333	0.0218816	0.034375	0.0447917	0.0458333	0.0302738	0.034375	0.0479167	0.0572917	0.0729167	0.0645833	0.0572917	0.062631	0.05625	0.0482459	0.0541667	0.0741034	0.0916667	0.0865902	0.0751245	0.0740304	0.0688155	0.0822917	0.0666667	0.0635417
revisit-10mmOut3mmIn-15s	MB011C	20xUAS-CsChrimson-mVenus-attP18	10sLED	AirLED	olfactoryArena1	Cam1	20190713T101455	6	0.136512	0.145463	0.144387	0.125019	0.112874	0.11067	0.110479	0.114674	0.117499	0.139052	0.134279	0.140687	0.140267	0.153273	0.147181	0.124006	0.104796	0.110094	0.126975	0.119062	0.100924	0.11863	0.165775	0.175287	0.14613	0.150996	0.142554	0.119839	0.141347	0.155594	0.154398	0.165843	0.166636	0.128985	0.109826	0.0965915	0.0919923	0.0890151	0.0834049	0.0868373	0.095458
revisit-10mmOut3mmIn-15s	MB011C	20xUAS-CsChrimson-mVenus-attP18	10sLED	AirLED	olfactoryArena1	Cam1	20190803T084129	6	0.0888733	0.0879922	0.0865061	0.101935	0.131696	0.144196	0.135863	0.118155	0.112946	0.120238	0.111905	0.10878	0.103571	0.0973214	0.113542	0.135814	0.151339	0.152381	0.166071	0.189137	0.148313	0.131548	0.159673	0.151628	0.136905	0.153987	0.171098	0.198333	0.18935	0.21269	0.200792	0.19062	0.18227	0.176528	0.178085	0.168843	0.164359	0.180139	0.185417	0.175718	0.193163
revisit-10mmOut3mmIn-15s	MB011C	20xUAS-CsChrimson-mVenus-attP18	10sLED	AirLED	olfactoryArena1	Cam1	20200225T134438	6	0.119978	0.0966912	0.110408	0.0904412	0.102941	0.115334	0.114821	0.139679	0.146814	0.157537	0.145466	0.148839	0.150458	0.132823	0.150481	0.164699	0.139828	0.155331	0.19537	0.192402	0.204295	0.166681	0.161493	0.153983	0.170347	0.178799	0.165997	0.180515	0.188174	0.176409	0.165135	0.115441	0.096201	0.131544	0.0936887	0.061152	0.0629289	0.080576	0.120895	0.0962923	0.100674
revisit-10mmOut3mmIn-15s	MB011C	20xUAS-CsChrimson-mVenus-attP18	10sLED	AirLED	Arena2	Cam1	20190713T100917	5	0.0243447	0	0	0.00235294	0.0247059	0.0453637	0.0477941	0.0454333	0.0338125	0.0360294	0.0360294	0.0366104	0.0226271	0.0450735	0.0502165	0.0470588	0.0456318	0.051414	0.0766344	0.0737602	0.0685418	0.0801537	0.0908542	0.117206	0.106618	0.104411	0.108971	0.0902793	0.109632	0.115294	0.138037	0.129412	0.120139	0.123529	0.107289	0.0836756	0.0776471	0.0824922	0.0741176	0.0588235	0.0588235
revisit-10mmOut3mmIn-15s	MB011C	20xUAS-CsChrimson-mVenus-attP18	10sLED	AirLED	Arena2	Cam1	20200225T134105	5	0.091241	0.0920209	0.0890476	0.103434	0.123468	0.117834	0.10411	0.105857	0.0926667	0.0837205	0.110539	0.132946	0.13534	0.12304	0.144849	0.145461	0.1587	0.152025	0.181843	0.184787	0.187853	0.20525	0.186876	0.152886	0.147314	0.144132	0.16942	0.174844	0.180958	0.163204	0.152305	0.152824	0.17177	0.140327	0.144726	0.158366	0.159782	0.145881	0.124483	0.129037	0.138802
revisit-10mmOut3mmIn-15s	MB011C	20xUAS-CsChrimson-mVenus-attP18	10sLED	AirLED	Arena2	Cam0	20190707T104343	4	0.155869	0.122036	0.13474	0.16449	0.156344	0.160549	0.186898	0.226854	0.281279	0.247194	0.201598	0.231249	0.221064	0.205973	0.180643	0.191184	0.209138	0.192446	0.202881	0.207399	0.195736	0.21733	0.232222	0.227265	0.244878	0.291535	0.281836	0.278158	0.237936	0.215534	0.21676	0.184656	0.182993	0.198224	0.165482	0.213552	0.203552	0.199678	0.242183	0.187672	0.186566
DeltaDistanceFromCenter	SS32218	20xUAS-CsChrimson-mVenus-attP18	10sLED	AirLED	Arena2	Cam0	20191205T143625	6	-0.0142284	-0.0111264	-0.013151	-0.0132986	-0.0127444	-0.0151502	-0.0147387	-0.0173663	-0.0211184	-0.0184417	-0.0141837	-0.0132262	-0.012827	-0.0111547	-0.0072699	-0.00373435	0.000825831	0.00454182	0.00904006	0.0119356	0.0117652	0.00817498	0.00627761	0.00646023	0.00732378	0.00609029	0.0030178	-0.00122865	-0.00098217	0	-0.000234874	-0.00359763	-0.0112628	-0.00929098	-0.00930572	-0.0119965	-0.00856949	-0.00980493	-0.0173855	-0.0217058	-0.0261163
DeltaDistanceFromCenter	SS32218	20xUAS-CsChrimson-mVenus-attP18	10sLED	AirLED	Arena2	Cam0	20191210T164824	6	-0.0379793	-0.0409858	-0.0369167	-0.0377489	-0.0375057	-0.0305668	-0.0188337	-0.00923961	-0.00794156	-0.0064842	-0.00839033	-0.0166051	-0.0211706	-0.0237447	-0.0268244	-0.018549	-0.00331301	0.0119507	0.00546729	-0.00598474	-0.0179116	-0.0208756	-0.0227312	-0.0219606	-0.0116608	-0.00777766	-0.00674282	-0.0055478	-0.00594762	0	0.00255987	-0.000514601	-0.0146136	-0.0215022	-0.031067	-0.0340784	-0.0125569	0.0201518	0.0408481	0.0467037	0.0372327
DeltaDistanceFromCenter	SS32218	20xUAS-CsChrimson-mVenus-attP18	10sLED	AirLED	Arena2	Cam0	20201028T180035	6	0.0411097	0.0431894	0.0405565	0.0376735	0.035589	0.0333282	0.0343374	0.0379916	0.0373771	0.0289771	0.0246424	0.0231429	0.0204597	0.0184519	0.0212803	0.0222051	0.0300798	0.0246558	0.0236774	0.0273595	0.0331029	0.0346925	0.0310411	0.0278361	0.023818	0.0213903	0.0155315	0.0105635	0.00254592	0	-0.00149007	-0.0044745	-0.00839966	-0.00822889	-0.00455918	-0.00155595	0.00156708	0.00499363	0.000724219	-0.00210202	-0.00569192
DeltaDistanceFromCenter	SS32218	20xUAS-CsChrimson-mVenus-attP18	10sLED	AirLED	Arena2	Cam1	20191205T143625	6	0.0211722	0.0245309	0.0233483	0.0191612	0.0172602	0.0170408	0.0113936	0.00283139	0.00493086	0.00880227	0.0153039	0.0224102	0.0224708	0.0218476	0.0233495	0.0204508	0.0183185	0.0200403	0.0238276	0.0197343	0.0217138	0.0237016	0.0178477	0.0155336	0.0100261	0.00644181	0.00611358	0.00182798	0.00105544	0	0.00263987	0.00533412	-0.00927939	-0.0291546	-0.0377001	-0.0487743	-0.0450095	-0.0415905	-0.0340671	-0.0250167	-0.0372911
DeltaDistanceFromCenter	SS32218	20xUAS-CsChrimson-mVenus-attP18	10sLED	AirLED	Arena2	Cam1	20191210T164824	6	0.00642796	0.00746363	0.00943563	0.0126309	0.0139574	0.0135434	0.0115157	0.0101594	0.00988034	0.0111007	0.0120032	0.0142595	0.0183049	0.0210913	0.0195494	0.0229535	0.0247522	0.0336797	0.0357798	0.0360392	0.0325423	0.0359558	0.0363553	0.0279402	0.0203056	0.0149429	0.0106703	0.00780837	0.000312568	0	-0.00215164	-0.0070476	-0.0239065	-0.0432514	-0.0473421	-0.0454033	-0.04827	-0.0433512	-0.0463193	-0.0523549	-0.0564629
DeltaDistanceFromCenter	SS32218	20xUAS-CsChrimson-mVenus-attP18	10sLED	AirLED	Arena2	Cam1	20201028T180035	6	0.0122687	0.0139777	0.0135174	0.0162159	0.0203905	0.0168858	0.0110876	0.0122537	0.0176405	0.0134495	0.00950157	0.00472582	0.0049399	-0.00054411	0.00258717	0.000774655	0.000441579	0.00246034	0.00534419	0.00180555	-0.000188547	0.00226994	0.00442734	0.0114894	0.0110588	0.00952767	0.0101781	0.00658348	0.00288097	0	-0.00506244	-0.00171688	-0.00384401	-0.00256462	0.00731022	0.00601761	0.000660573	0.00524326	0.0118651	0.00351881	-0.0152917
DeltaDistanceFromCenter	SS32218	20xUAS-CsChrimson-mVenus-attP18	10sLED	AirLED	olfactoryArena1	Cam0	20191205T143838	6	-0.00443363	-0.00112363	0.00721311	0.0167279	0.0117361	0.00632416	0.00692887	0.00910212	0.0129936	0.0112314	0.0123139	0.0136283	0.0127932	0.0157934	0.0136487	0.00802253	0.00642294	0.00973401	0.00994436	0.00579205	0.000636864	-0.00371622	-0.00320704	0.00914399	0.0110731	0.0113883	0.00683734	0.00565783	0.00354902	0	0.0029862	0.00142786	0.00163666	-0.00480431	-0.0132088	-0.0318549	-0.0443233	-0.0527241	-0.0651106	-0.0702595	-0.0669763
DeltaDistanceFromCenter	SS32218	20xUAS-CsChrimson-mVenus-attP18	10sLED	AirLED	olfactoryArena1	Cam0	20191210T165034	6	0.00240452	0.009234	0.0122456	0.015814	0.0165736	0.0166787	0.0120324	0.0141827	0.0168808	0.0193203	0.0205839	0.0205593	0.0222907	0.0238505	0.0291779	0.026387	0.0182124	0.0109018	0.0071897	0.00667354	0.00380576	0.000673427	0.00320556	0.0052601	-0.000353187	-0.000359716	-0.00232818	-0.00024114	0.00166098	0	0.00370263	0.00457035	0.00526805	-0.00133723	-0.0131763	-0.0215526	-0.0294989	-0.0399617	-0.0411208	-0.0476261	-0.0551097
DeltaDistanceFromCenter	SS32218	20xUAS-CsChrimson-mVenus-attP18	10sLED	AirLED	olfactoryArena1	Cam1	20191205T143838	6	-0.0177394	-0.0150456	-0.0147466	-0.0123535	-0.00819606	-0.00776799	-0.00109168	0.000962903	-0.00183797	-0.00430696	0.00236235	0.00173015	0.00220324	0.00467464	0.00969029	0.00845457	0.00946288	0.0111624	0.00749469	0.00457087	0.00146114	0.00353488	0.00294513	0.00126732	0.000521668	0.00218694	0.00427755	0.003528	0.00199332	0	-0.00355598	-0.000818014	-0.00433272	-0.00775986	-0.0145442	-0.0212777	-0.0179622	-0.0140858	-0.00523647	0.00329194	0.00901389
DeltaDistanceFromCenter	SS32218	20xUAS-CsChrimson-mVenus-attP18	10sLED	AirLED	olfactoryArena1	Cam1	20191210T165034	6	-0.0256057	-0.0240197	-0.0265946	-0.0244382	-0.0224609	-0.0211862	-0.0196221	-0.0202374	-0.0200916	-0.0192218	-0.0299377	-0.0263532	-0.0104483	-0.00995534	-0.00599201	-0.00262208	-0.00358206	-0.0181776	-0.0115232	-0.00842137	0.00206563	0.0054761	0.00187123	-0.000360417	0.000749552	0.00214266	0.00243612	-4.2565e-05	-0.000337601	0	0.00184133	0.0075825	0.00299559	-0.0042699	-0.0141204	-0.0184276	-0.0279072	-0.0427334	-0.0570596	-0.0660684	-0.0782076
Cos(Upwind)	SS32218	20xUAS-CsChrimson-mVenus-attP18	10sLED	AirLED	Arena2	Cam0	20191205T143625	6	-0.0596864	-0.0402161	-0.0731859	-0.0375693	-0.0103158	-0.0300247	-0.035179	-0.0534644	-0.0113867	-0.00388511	0.0237521	0.00679533	0.0215496	0.022175	0.02091	0.0156915	-0.00344181	-0.000566526	0.0260653	0.00739561	-0.0203433	-0.0684928	-0.0433116	-0.0299787	-0.0491074	-0.0667365	-0.0747877	-0.0626677	-0.0319101	-0.0336764	-0.0593287	-0.0711558	-0.0309059	0.045581	0.042088	0.0413438	0.0717668	0.06117	0.0622984	0.0301332	0.0419286
Cos(Upwind)	SS32218	20xUAS-CsChrimson-mVenus-attP18	10sLED	AirLED	Arena2	Cam0	20191210T164824	6	-0.162503	-0.0789312	-0.0251675	-0.0170757	-0.0468862	-0.0522295	-0.0543736	-0.129868	-0.115617	-0.122531	-0.125364	-0.23764	-0.263794	-0.228484	-0.100438	0.0158981	-0.0788357	-0.0587283	-0.123525	-0.146606	-0.130102	-0.122744	-0.143599	-0.111461	-0.0264473	-0.0407085	-0.0890342	-0.162102	-0.174231	-0.188736	-0.226432	-0.176928	-0.0457536	0.00499891	0.0215905	0.0659899	0.132242	0.141309	0.0656649	0.0314108	-0.0165331
Cos(Upwind)	SS32218	20xUAS-CsChrimson-mVenus-attP18	10sLED	AirLED	Arena2	Cam0	20201028T180035	6	-0.0886143	-0.012321	-0.0368578	-0.0359813	-0.0590187	-0.0247239	-0.00768949	-0.042273	-0.0634226	-0.0785422	-0.0502113	-0.0328575	-0.0286431	0.000126017	0.00340045	0.0235731	0.0117022	-0.0317384	-0.0303572	0.00692436	0.0141738	-0.0155741	-0.0245261	-0.079808	-0.100904	-0.0890346	-0.108009	-0.0807808	-0.0835708	-0.117666	-0.122528	-0.0529725	0.0719066	0.126298	0.135617	0.121611	0.0789407	0.0587034	0.028623	0.0432329	0.0387427
Cos(Upwind)	SS32218	20xUAS-CsChrimson-mVenus-attP18	10sLED	AirLED	Arena2	Cam1	20191205T143625	6	-0.036887	-0.0848014	-0.130691	-0.0791562	-0.0690499	-0.101822	-0.156872	-0.171182	-0.106282	-0.0812275	-0.0700939	-0.112598	-0.163569	-0.164849	-0.147806	-0.14849	-0.12663	-0.0862678	-0.0940104	-0.119751	-0.105566	-0.160082	-0.179777	-0.16602	-0.166233	-0.145686	-0.184565	-0.191543	-0.178562	-0.184738	-0.14301	-0.098087	-0.0133712	0.0630161	0.0993126	0.0982184	0.0930303	0.0915977	0.0975552	0.0601519	0.00980686
Cos(Upwind)	SS32218	20xUAS-CsChrimson-mVenus-attP18	10sLED	AirLED	Arena2	Cam1	20191210T164824	6	-0.0105819	-0.0639379	-0.0970681	-0.0610415	-0.103026	-0.107642	-0.121933	-0.125472	-0.107527	-0.114485	-0.122246	-0.100857	-0.0729442	-0.0730011	-0.110855	-0.0258996	-0.00769756	-0.0238886	-0.0397628	-0.106963	-0.109178	-0.0830282	-0.0863509	-0.103517	-0.0934215	-0.112326	-0.122666	-0.128627	-0.135015	-0.0989759	-0.0884885	-0.0564868	-0.0469703	-0.0204218	0.000911641	0.00466337	0.0278519	0.0105612	-0.0360767	-0.0598072	-0.0525998
Cos(Upwind)	SS32218	20xUAS-CsChrimson-mVenus-attP18	10sLED	AirLED	Arena2	Cam1	20201028T180035	6	-0.0686918	-0.148041	-0.194808	-0.128726	-0.152786	-0.171131	-0.140451	-0.130136	-0.197234	-0.244563	-0.249991	-0.270581	-0.283132	-0.20805	-0.134049	-0.136319	-0.150097	-0.147801	-0.140171	-0.159516	-0.156168	-0.123454	-0.0764338	-0.0490129	-0.0758362	-0.101671	-0.0727461	-0.0971428	-0.0983351	-0.124641	-0.0745384	0.0417528	0.129716	0.139422	0.0803805	0.0662704	0.0843393	0.0547198	-0.0181513	-0.0349234	-0.0609833
Cos(Upwind)	SS32218	20xUAS-CsChrimson-mVenus-attP18	10sLED	AirLED	olfactoryArena1	Cam0	20191205T143838	6	0.0116548	-0.0917129	-0.117566	-0.12287	-0.177141	-0.145975	-0.125917	-0.100974	-0.10508	-0.0597345	-0.0947289	-0.108729	-0.118989	-0.115732	-0.105699	-0.120501	-0.0728511	-0.0695358	-0.10129	-0.0765378	-0.0625765	-0.085823	-0.0188663	0.035182	-0.0370542	-0.0719107	-0.123096	-0.118768	-0.0812989	-0.0844833	-0.0565913	-0.0500544	-0.0194002	0.0061168	0.0483128	0.0212337	0.012661	0.0325175	-0.0146485	-0.0510103	-0.0682833
Cos(Upwind)	SS32218	20xUAS-CsChrimson-mVenus-attP18	10sLED	AirLED	olfactoryArena1	Cam0	20191210T165034	6	-0.049103	-0.0982541	-0.11717	-0.0971516	-0.107976	-0.0905093	-0.154384	-0.0724247	-0.036326	-0.0149961	-0.0712704	-0.12766	-0.167812	-0.136893	-0.10605	-0.140587	-0.174515	-0.190821	-0.180446	-0.0977776	-0.118105	-0.156343	-0.163609	-0.164407	-0.169874	-0.131628	-0.113668	-0.120855	-0.139884	-0.142214	-0.161131	-0.101435	0.0192058	0.0959637	0.0962354	0.119457	0.0373406	-0.0154033	-0.00239565	-0.0317919	-0.0439707
Cos(Upwind)	SS32218	20xUAS-CsChrimson-mVenus-attP18	10sLED	AirLED	olfactoryArena1	Cam1	20191205T143838	6	-0.186716	-0.128893	-0.151395	-0.131382	-0.128634	-0.173544	-0.15284	-0.145014	-0.148907	-0.147952	-0.150829	-0.104048	-0.0753195	-0.109352	-0.121084	-0.153158	-0.144009	-0.131657	-0.14858	-0.149543	-0.141111	-0.14219	-0.122507	-0.115721	-0.122803	-0.111239	-0.111724	-0.13085	-0.136673	-0.114797	-0.0557367	0.0421087	0.0689463	0.0957018	0.0545567	0.0347683	0.0772685	0.0837315	0.11533	0.104733	0.121766
Cos(Upwind)	SS32218	20xUAS-CsChrimson-mVenus-attP18	10sLED	AirLED	olfactoryArena1	Cam1	20191210T165034	6	-0.305931	-0.168551	-0.119095	-0.0726949	-0.0729448	-0.0631964	-0.0988034	-0.123347	-0.111494	-0.108034	-0.127758	-0.0830131	-0.109544	-0.147377	-0.12073	-0.118357	-0.158694	-0.173108	-0.134235	-0.0994602	-0.0496705	-0.0715705	-0.0953029	-0.0759068	-0.0397996	-0.0270009	-0.0976164	-0.125434	-0.113986	-0.103302	-0.0756184	0.0112563	0.0844421	0.0730246	0.0701049	0.0545649	0.00945936	-0.0233474	-0.0469931	-0.0772453	-0.0674738
DeltaAnglefroPreviousFrame	SS32218	20xUAS-CsChrimson-mVenus-attP18	10sLED	AirLED	Arena2	Cam0	20191205T143625	6	83.5124	100.005	100.777	96.8129	95.7444	90.7367	97.9841	89.2451	89.8896	94.0855	96.7304	89.76	92.1475	96.1707	104.591	101.558	102.417	96.6935	95.0546	100.311	101.51	106.775	110.284	105.471	94.7789	99.7458	97.6603	101.846	100.865	108.288	102.881	146.068	132.92	119.045	133.077	110.205	113.367	119.577	107.375	108.886	110.492
DeltaAnglefroPreviousFrame	SS32218	20xUAS-CsChrimson-mVenus-attP18	10sLED	AirLED	Arena2	Cam0	20191210T164824	6	93.6423	93.5564	96.1633	122.922	90.0138	110.429	109.515	96.7563	101.779	97.0442	102.672	104.127	124.327	127.823	128.559	103.832	116.749	100.07	116.505	110.226	123.709	102.784	119.522	90.4657	87.0266	96.5733	102.288	110.882	104.356	112.43	106.796	161.664	174.199	135.132	125.524	119.923	115.692	115.085	92.73	115.244	95.9268
DeltaAnglefroPreviousFrame	SS32218	20xUAS-CsChrimson-mVenus-attP18	10sLED	AirLED	Arena2	Cam0	20201028T180035	6	108.654	108.637	107.609	100.843	105.042	119.359	99.5077	94.2778	90.4572	100.382	104.627	99.75	98.3227	103.972	110.02	90.9285	111.097	113.102	112.268	100.692	102.152	104.575	110.116	99.9119	96.8289	109.946	107.412	95.7715	110.218	95.1403	84.3642	152.049	130.917	115.043	99.6028	94.1607	85.9881	100.397	109.426	104.093	98.2445
DeltaAnglefroPreviousFrame	SS32218	20xUAS-CsChrimson-mVenus-attP18	10sLED	AirLED	Arena2	Cam1	20191205T143625	6	89.6222	98.6776	96.7551	93.2064	104.574	101.282	99.3884	97.4159	96.3504	90.6512	103.799	106.254	93.2748	106.402	92.0582	94.8018	94.9599	96.0657	103.146	96.7755	95.8415	100.464	93.3203	87.2471	83.6208	88.2863	95.954	94.9514	99.597	85.3979	171.285	147.542	131.791	124.895	123.376	124.299	117.422	111.715	115.611	134.244	116.058
DeltaAnglefroPreviousFrame	SS32218	20xUAS-CsChrimson-mVenus-attP18	10sLED	AirLED	Arena2	Cam1	20191210T164824	6	91.0056	86.0987	93.6918	94.4791	101.875	93.1573	85.6253	88.3037	97.8983	97.4733	94.1444	102.456	99.1754	98.572	95.2823	98.7107	93.9864	98.0347	99.3418	97.551	101.352	109.531	107.149	99.6335	101.729	90.6834	90.2325	93.839	93.8011	94.3887	154.181	134.107	136.276	131.729	131.294	118.088	110.104	114.707	116.798	109.698	112.487
DeltaAnglefroPreviousFrame	SS32218	20xUAS-CsChrimson-mVenus-attP18	10sLED	AirLED	Arena2	Cam1	20201028T180035	6	87.8516	109.934	119.913	109.148	118.239	97.184	103.553	96.8294	105.628	108.37	104.309	101.648	107.209	104.812	102.254	116.896	119.822	118.856	108.06	110.222	94.866	103.537	107.238	96.3109	102.087	104.278	89.6733	96.0091	113.937	105.291	178.39	146.055	122.554	106.431	98.3589	115.795	106.972	101.764	97.8315	111.87	106.825
DeltaAnglefroPreviousFrame	SS32218	20xUAS-CsChrimson-mVenus-attP18	10sLED	AirLED	olfactoryArena1	Cam0	20191205T143838	6	110.269	106.752	103.132	85.5885	107.606	111.112	96.7402	99.9836	100.558	104.486	96.8571	101.616	100.059	87.4917	87.7686	91.7814	100.957	90.1416	93.9395	105.891	101.683	94.472	112.551	110.74	129.67	99.5307	109.402	94.47	105.422	99.8535	107.807	168.217	135.27	127.434	116.93	115.719	110.953	111.845	107.789	94.5456	107.365
DeltaAnglefroPreviousFrame	SS32218	20xUAS-CsChrimson-mVenus-attP18	10sLED	AirLED	olfactoryArena1	Cam0	20191210T165034	6	102.772	102.033	92.5973	98.3454	104.829	97.5873	95.9695	106.04	111.522	99.9002	106.431	99.9466	105.852	94.4528	91.1285	93.6369	90.5156	91.7038	97.5982	85.646	91.516	90.891	97.5751	120.806	102.253	100.917	96.5531	93.8603	100.963	87.7962	86.9561	175.875	171.559	155.867	142.786	137.578	128.715	126.12	121.853	115.315	115.674
DeltaAnglefroPreviousFrame	SS32218	20xUAS-CsChrimson-mVenus-attP18	10sLED	AirLED	olfactoryArena1	Cam1	20191205T143838	6	88.831	97.8983	85.881	92.6212	99.2271	99.9161	93.3843	112.627	102.135	99.8216	90.147	108.398	115.963	105.868	98.4768	93.9769	107.301	119.982	121.84	107.647	102.552	91.7334	92.8079	101.119	87.7196	93.7978	102.332	100.484	92.7878	88.0379	168.788	140.632	149.393	137.944	119.976	122.467	115.946	122.503	121.284	116.787	122.092
DeltaAnglefroPreviousFrame	SS32218	20xUAS-CsChrimson-mVenus-attP18	10sLED	AirLED	olfactoryArena1	Cam1	20191210T165034	6	95.1701	77.5065	88.6916	84.7388	90.261	85.9998	87.6657	103.997	104.328	92.6867	101.463	111.06	92.3241	91.092	95.0361	89.5355	85.4089	95.5454	82.1747	89.0117	88.5077	98.7036	76.1603	86.7956	90.6693	87.8899	79.7482	77.3116	88.3427	83.7985	172.134	152.124	131.135	115.95	118.439	98.7139	100.788	109.333	116.16	103.55	98.6426
WalkingDistanceFromPreviousFrame	SS32218	20xUAS-CsChrimson-mVenus-attP18	10sLED	AirLED	Arena2	Cam0	20191205T143625	6	1.73446	1.94708	1.95594	1.93944	1.81679	1.8727	1.83319	1.77165	1.87044	1.77537	1.93825	1.88888	1.81514	1.86237	1.90388	2.01885	1.97158	2.00616	1.74286	1.95038	1.89367	2.0951	2.11117	2.06496	1.89198	1.98972	2.03839	1.92833	1.86568	1.8341	1.82532	2.20979	2.53678	2.98242	3.13384	2.95064	2.5459	2.65806	2.74553	2.69198	2.8494
WalkingDistanceFromPreviousFrame	SS32218	20xUAS-CsChrimson-mVenus-attP18	10sLED	AirLED	Arena2	Cam0	20191210T164824	6	1.64122	2.07021	2.25928	2.40396	2.53032	2.60181	2.72418	2.4702	2.35273	2.13986	2.13322	2.19101	2.07233	2.10556	2.44314	2.4826	2.27594	2.31397	2.1903	2.12686	2.48593	2.21199	2.25816	2.26572	2.23296	2.5216	2.46161	2.44467	2.59909	2.40115	2.1261	2.96869	2.76631	3.08966	3.37173	3.22236	3.21549	3.27944	3.39026	3.16752	3.41772
WalkingDistanceFromPreviousFrame	SS32218	20xUAS-CsChrimson-mVenus-attP18	10sLED	AirLED	Arena2	Cam0	20201028T180035	6	1.23115	1.64556	1.59248	1.4106	1.47823	1.5093	1.4058	1.43581	1.41386	1.55357	1.50726	1.44018	1.48001	1.56905	1.56376	1.52722	1.48657	1.52543	1.5424	1.51463	1.48265	1.43243	1.43165	1.33909	1.39746	1.48093	1.50058	1.49937	1.47864	1.53026	1.47238	1.95225	2.0236	2.26493	2.22645	2.25062	2.14827	2.23626	2.12255	2.09686	2.06703
WalkingDistanceFromPreviousFrame	SS32218	20xUAS-CsChrimson-mVenus-attP18	10sLED	AirLED	Arena2	Cam1	20191205T143625	6	1.65561	1.85393	1.7148	1.75125	1.71058	1.83294	1.78994	1.84107	1.7737	1.70404	1.89241	1.78922	1.83928	1.78492	1.66055	1.74622	1.77779	1.63965	1.74054	1.61444	1.58282	1.73992	1.89086	1.92308	1.77308	1.63253	1.77436	1.65921	1.66553	1.68011	2.40065	2.92041	3.44016	3.56751	3.40303	3.35901	3.38453	3.25055	3.26266	2.90334	2.88711
WalkingDistanceFromPreviousFrame	SS32218	20xUAS-CsChrimson-mVenus-attP18	10sLED	AirLED	Arena2	Cam1	20191210T164824	6	1.393	1.49366	1.56363	1.38284	1.48015	1.57092	1.54882	1.37008	1.42172	1.58895	1.54937	1.62203	1.63867	1.43987	1.55892	1.45698	1.51359	1.54796	1.61847	1.72765	1.62997	1.59385	1.69537	1.6509	1.58684	1.44193	1.51038	1.48594	1.69479	1.70856	2.09675	2.84909	3.27454	3.15859	3.09684	3.0374	2.99736	2.92607	2.68975	2.60464	2.79317
WalkingDistanceFromPreviousFrame	SS32218	20xUAS-CsChrimson-mVenus-attP18	10sLED	AirLED	Arena2	Cam1	20201028T180035	6	1.28082	1.45157	1.43887	1.42562	1.49066	1.41782	1.27205	1.24975	1.12526	1.22335	1.27922	1.39204	1.42115	1.31044	1.27507	1.33986	1.40554	1.41763	1.32148	1.37201	1.33323	1.31145	1.32311	1.20592	1.1949	1.26791	1.18867	1.34945	1.40432	1.37715	1.98429	2.3202	2.68379	2.53647	2.28935	2.2653	2.39049	2.11682	2.0303	2.15972	2.16699
WalkingDistanceFromPreviousFrame	SS32218	20xUAS-CsChrimson-mVenus-attP18	10sLED	AirLED	olfactoryArena1	Cam0	20191205T143838	6	1.34148	1.65412	1.65441	1.37786	1.43404	1.47354	1.37672	1.5221	1.49906	1.40326	1.56141	1.50798	1.49119	1.40535	1.43529	1.45415	1.51854	1.45281	1.32477	1.48144	1.36143	1.47625	1.54268	1.48979	1.73453	1.5087	1.64841	1.56108	1.6945	1.52579	1.44163	2.16945	2.66035	3.48922	3.71916	3.2582	2.99611	2.71789	2.80338	2.65535	2.66206
WalkingDistanceFromPreviousFrame	SS32218	20xUAS-CsChrimson-mVenus-attP18	10sLED	AirLED	olfactoryArena1	Cam0	20191210T165034	6	1.48209	1.66322	1.51348	1.48523	1.49946	1.60723	1.52811	1.59137	1.70214	1.45841	1.38338	1.39939	1.49157	1.45146	1.49042	1.47794	1.35346	1.36898	1.49445	1.39968	1.41817	1.4479	1.39294	1.69904	1.51921	1.42563	1.4874	1.53484	1.49536	1.39069	1.27894	2.18806	3.13114	3.41085	3.46049	3.16998	2.67497	2.79505	2.68923	2.88364	3.14617
WalkingDistanceFromPreviousFrame	SS32218	20xUAS-CsChrimson-mVenus-attP18	10sLED	AirLED	olfactoryArena1	Cam1	20191205T143838	6	1.37446	1.74799	1.53994	1.38611	1.4675	1.44722	1.32759	1.55878	1.54085	1.33319	1.18586	1.52601	1.44438	1.54578	1.49268	1.41691	1.49636	1.49566	1.43749	1.56743	1.62794	1.54731	1.4534	1.5469	1.40215	1.58855	1.66133	1.41305	1.55189	1.5272	2.48484	2.86839	3.41734	3.23571	2.94561	2.85733	2.99009	2.88795	2.66211	2.60827	2.81912
WalkingDistanceFromPreviousFrame	SS32218	20xUAS-CsChrimson-mVenus-attP18	10sLED	AirLED	olfactoryArena1	Cam1	20191210T165034	6	0.99424	1.18239	1.16453	1.12399	1.12578	1.14936	1.28108	1.28041	1.33359	1.29628	1.3707	1.4944	1.29672	1.3367	1.30786	1.24886	1.14691	1.47879	1.18153	1.15175	1.27257	1.37587	1.14091	1.16185	1.05524	1.11853	1.05338	1.12986	1.1726	1.16417	2.02585	3.04033	3.63309	3.30456	3.00546	2.74718	2.57161	2.49249	2.51213	2.52264	2.34697
revisit-10mmOut3mmIn-15s	SS32218	20xUAS-CsChrimson-mVenus-attP18	10sLED	AirLED	Arena2	Cam0	20191205T143625	6	0.141693	0.140965	0.140407	0.14651	0.156173	0.158333	0.160209	0.160328	0.16377	0.152327	0.169777	0.173077	0.17595	0.169611	0.162868	0.175047	0.193803	0.195655	0.190028	0.199354	0.200428	0.220289	0.205015	0.208231	0.183381	0.184425	0.171262	0.171548	0.158476	0.157075	0.167403	0.158146	0.151662	0.160209	0.17595	0.184754	0.177586	0.19245	0.163109	0.152849	0.160795
revisit-10mmOut3mmIn-15s	SS32218	20xUAS-CsChrimson-mVenus-attP18	10sLED	AirLED	Arena2	Cam0	20191210T164824	6	0.170617	0.169444	0.183333	0.148765	0.115432	0.126543	0.136111	0.152778	0.166667	0.169444	0.183333	0.166667	0.172222	0.158333	0.138889	0.138889	0.169444	0.214077	0.219444	0.244444	0.222222	0.175	0.144444	0.113889	0.122222	0.133333	0.15	0.108333	0.0805556	0.0861111	0.0555556	0.00574713	0.00277778	0.0138889	0.0111111	0.0472222	0.0555556	0.0777778	0.05	0.0277778	0.0277778
revisit-10mmOut3mmIn-15s	SS32218	20xUAS-CsChrimson-mVenus-attP18	10sLED	AirLED	Arena2	Cam0	20201028T180035	6	0.151807	0.135478	0.127206	0.127635	0.133946	0.134375	0.144608	0.130147	0.126892	0.188664	0.213235	0.1875	0.161902	0.173958	0.151103	0.153383	0.156355	0.14761	0.159632	0.142463	0.126532	0.1375	0.133027	0.150522	0.155086	0.159418	0.119301	0.114464	0.136765	0.130468	0.120742	0.112658	0.0918865	0.112431	0.118635	0.127654	0.127437	0.120577	0.131826	0.130563	0.124387
revisit-10mmOut3mmIn-15s	SS32218	20xUAS-CsChrimson-mVenus-attP18	10sLED	AirLED	Arena2	Cam1	20191205T143625	6	0.172731	0.178889	0.159407	0.132868	0.124994	0.144577	0.151382	0.140426	0.147874	0.16913	0.191501	0.176662	0.160785	0.164653	0.180355	0.191673	0.184768	0.192469	0.174509	0.147663	0.148786	0.157593	0.153315	0.131804	0.123023	0.134671	0.159724	0.147225	0.135699	0.121502	0.132464	0.15266	0.122592	0.13067	0.148864	0.125472	0.114874	0.112218	0.109967	0.110846	0.0871903
revisit-10mmOut3mmIn-15s	SS32218	20xUAS-CsChrimson-mVenus-attP18	10sLED	AirLED	Arena2	Cam1	20191210T164824	6	0.0815974	0.078039	0.0676972	0.0751121	0.0667199	0.0767365	0.111305	0.134264	0.121385	0.126528	0.133374	0.121664	0.15331	0.173147	0.175877	0.188809	0.208637	0.236234	0.225867	0.206049	0.218934	0.216168	0.190356	0.18936	0.198267	0.183826	0.180383	0.201601	0.184114	0.211806	0.215981	0.187596	0.177572	0.156579	0.146894	0.112642	0.102876	0.111005	0.115015	0.101319	0.101075
revisit-10mmOut3mmIn-15s	SS32218	20xUAS-CsChrimson-mVenus-attP18	10sLED	AirLED	Arena2	Cam1	20201028T180035	6	0.133862	0.137874	0.152508	0.165636	0.165965	0.163437	0.150745	0.121604	0.151244	0.156299	0.160597	0.147313	0.169565	0.195191	0.215597	0.209586	0.221758	0.205725	0.194283	0.167787	0.185689	0.198257	0.199004	0.20524	0.179743	0.166733	0.162102	0.168871	0.161332	0.160389	0.158133	0.154202	0.139124	0.138677	0.164121	0.152963	0.162525	0.183809	0.181376	0.17391	0.18088
revisit-10mmOut3mmIn-15s	SS32218	20xUAS-CsChrimson-mVenus-attP18	10sLED	AirLED	olfactoryArena1	Cam0	20191205T143838	6	0.181668	0.182411	0.201123	0.197016	0.216687	0.216096	0.222061	0.207982	0.203866	0.179712	0.195888	0.198632	0.207719	0.230789	0.211654	0.229757	0.237886	0.216695	0.208947	0.201798	0.203509	0.179425	0.150118	0.149122	0.16889	0.148274	0.17116	0.171428	0.171485	0.163433	0.132013	0.124567	0.113733	0.0977087	0.102141	0.0946839	0.0658743	0.0759264	0.0880094	0.112149	0.0918842
revisit-10mmOut3mmIn-15s	SS32218	20xUAS-CsChrimson-mVenus-attP18	10sLED	AirLED	olfactoryArena1	Cam0	20191210T165034	6	0.152807	0.162719	0.151984	0.151578	0.151846	0.15596	0.131676	0.145138	0.170359	0.226291	0.238281	0.236556	0.229891	0.232846	0.22729	0.20486	0.229825	0.253875	0.257689	0.266505	0.247066	0.221294	0.185231	0.172719	0.182484	0.185332	0.173426	0.168065	0.143397	0.144909	0.150501	0.145152	0.136481	0.1239	0.0816903	0.0752807	0.0715918	0.0757323	0.0549994	0.0615892	0.0831326
revisit-10mmOut3mmIn-15s	SS32218	20xUAS-CsChrimson-mVenus-attP18	10sLED	AirLED	olfactoryArena1	Cam1	20191205T143838	6	0.191469	0.187786	0.204301	0.203333	0.204167	0.206961	0.199428	0.198459	0.188333	0.196792	0.184167	0.166667	0.163333	0.166667	0.183333	0.1875	0.196667	0.185	0.179292	0.143333	0.135833	0.129167	0.1525	0.150833	0.141667	0.129167	0.13	0.150833	0.144167	0.164167	0.167094	0.149913	0.150266	0.140404	0.142544	0.144591	0.146842	0.127637	0.100957	0.114608	0.15156
revisit-10mmOut3mmIn-15s	SS32218	20xUAS-CsChrimson-mVenus-attP18	10sLED	AirLED	olfactoryArena1	Cam1	20191210T165034	6	0.148597	0.163966	0.162454	0.13943	0.126798	0.125439	0.112588	0.103421	0.0964474	0.0937678	0.0984994	0.105088	0.103421	0.10136	0.117105	0.107996	0.110526	0.126599	0.145478	0.144342	0.138901	0.129489	0.101522	0.100439	0.100437	0.095582	0.0929106	0.09815	0.0996053	0.108818	0.104854	0.130526	0.166353	0.161918	0.178071	0.155435	0.148365	0.142895	0.131705	0.119309	0.122049
DeltaDistanceFromCenter	SS49755	20xUAS-CsChrimson-mVenus-attP18	10sLED	AirLED	Arena2	Cam0	20191210T154323	6	-0.0211008	-0.0176351	-0.0196618	-0.0194451	-0.0239872	-0.0293557	-0.0378959	-0.044437	-0.0480877	-0.0413559	-0.041118	-0.0449747	-0.0517531	-0.0491047	-0.0414305	-0.0402848	-0.0452508	-0.0425794	-0.0383374	-0.0427388	-0.0478924	-0.0438335	-0.0322116	-0.0168475	-0.00482697	0.00441916	0.00595403	0.00467938	0.00157959	0	-0.00359423	0.000945106	-0.00263192	-0.0113469	-0.0233348	-0.0366654	-0.0371555	-0.0269102	-0.0262877	-0.0429061	-0.0518646
DeltaDistanceFromCenter	SS49755	20xUAS-CsChrimson-mVenus-attP18	10sLED	AirLED	Arena2	Cam0	20200225T112947	6	0.0261564	0.0249807	0.025098	0.0218222	0.016012	0.0110946	0.00921058	0.0142009	0.0193289	0.0187077	0.0183952	0.0171027	0.0153835	0.0138614	0.00992395	0.00744343	0.00530317	0.00564899	0.00597801	0.00950055	0.0174578	0.0184968	0.0151659	0.0158102	0.0141978	0.0104639	0.00514492	0.00203023	0.00342849	0	-0.00691237	-0.0174833	-0.0259788	-0.0284678	-0.0252487	-0.0201723	-0.0171891	-0.0185157	-0.0254627	-0.0379664	-0.043452
DeltaDistanceFromCenter	SS49755	20xUAS-CsChrimson-mVenus-attP18	10sLED	AirLED	Arena2	Cam1	20191210T154323	6	-0.0747793	-0.0664644	-0.0599187	-0.0539465	-0.0480265	-0.0451587	-0.0461571	-0.052145	-0.0493593	-0.0348518	-0.0360937	-0.0364664	-0.041278	-0.0360492	-0.0265837	-0.0189334	-0.0245811	-0.0295135	-0.0316577	-0.0334869	-0.033298	-0.0285347	-0.0263494	-0.028524	-0.0207151	-0.0233788	-0.0230673	-0.0183916	-0.00460998	0	-0.00390202	-0.028909	-0.0449018	-0.0461349	-0.0600381	-0.0566271	-0.0600693	-0.0689646	-0.0724005	-0.0762083	-0.0992263
DeltaDistanceFromCenter	SS49755	20xUAS-CsChrimson-mVenus-attP18	10sLED	AirLED	Arena2	Cam1	20200225T112947	6	-0.0246713	-0.0271033	-0.0243282	-0.018564	-0.0146357	-0.00893229	-0.000857248	0.00446708	0.0107722	0.00467074	-0.00655905	-0.0084068	-0.00689626	-0.00401034	-0.00341711	0.000666394	0.00413702	0.00511663	0.00235443	0.0058907	0.00457822	0.00687296	0.00853767	0.0135159	0.0211532	0.0250157	0.0199774	0.0108052	0.00659375	0	-0.0150149	-0.0314084	-0.0353407	-0.0355069	-0.0329864	-0.0332689	-0.0311766	-0.0204439	-0.0152352	-0.014814	-0.0172016
DeltaDistanceFromCenter	SS49755	20xUAS-CsChrimson-mVenus-attP18	10sLED	AirLED	olfactoryArena1	Cam0	20191206T132144	6	-0.0169972	-0.0225213	-0.0305649	-0.0369811	-0.0430837	-0.038829	-0.0334133	-0.0300966	-0.0229522	-0.0169272	-0.018524	-0.0123565	-0.00694249	-0.00209571	0.000199238	-0.00507004	-0.00464472	0.000527762	0.0038999	0.00226056	-0.00419086	-0.0106021	-0.0091691	-0.00284919	-0.00445336	-0.000771634	0.00133442	-0.00234965	-0.005911	0	0.00592516	0.00641127	-0.0060071	-0.0156489	-0.023268	-0.0322087	-0.0292316	-0.0188007	-0.013251	-0.0102808	-0.0124405
DeltaDistanceFromCenter	SS49755	20xUAS-CsChrimson-mVenus-attP18	10sLED	AirLED	olfactoryArena1	Cam0	20191210T154542	6	0.0542515	0.064182	0.0661343	0.0621046	0.0580486	0.0493182	0.0380477	0.0244073	0.00722707	0.000474732	-0.0027425	-0.00724975	-0.014697	-0.0151891	-0.0112234	-0.00337487	0.00404597	0.00901185	0.0073613	0.00613194	0.00569812	0.00536879	0.00318809	0.000239958	-0.00353509	0.000519271	0.00818731	0.00477021	0.00250237	0	-0.0027044	-0.00665753	-0.0220092	-0.0428139	-0.0489079	-0.0505296	-0.0427105	-0.0290794	-0.0160251	-0.0140881	-0.0111026
DeltaDistanceFromCenter	SS49755	20xUAS-CsChrimson-mVenus-attP18	10sLED	AirLED	olfactoryArena1	Cam0	20200225T114405	6	0.0330611	0.0400698	0.0471865	0.0502398	0.0555679	0.0587433	0.0582374	0.0503776	0.0421115	0.0364377	0.0391197	0.040881	0.038806	0.034408	0.0277831	0.0284072	0.0330887	0.035468	0.0361235	0.0375782	0.0368913	0.0303518	0.0170735	0.0055976	0.00209002	-0.00148685	0.000143427	0.00358907	0.00143129	0	0.00345993	0.00896811	0.00194038	-0.0154267	-0.0175207	-0.0150475	-0.0167813	-0.00763084	0.00598922	0.0163691	0.0198844
DeltaDistanceFromCenter	SS49755	20xUAS-CsChrimson-mVenus-attP18	10sLED	AirLED	olfactoryArena1	Cam1	20191206T132144	6	0.0119756	0.00401869	-0.00584551	-0.010104	-0.0114602	-0.00820232	-0.00588779	-0.00824713	-0.00916332	-0.0119105	-0.021484	-0.025179	-0.0259648	-0.0232578	-0.0189423	-0.0148393	-0.00477739	0.000838098	0.00793978	0.0130415	0.019783	0.0197124	0.0195612	0.0169649	0.0173776	0.0146415	0.013089	0.0055071	-0.000747296	0	0.00328825	0.00641426	0.0201189	0.0322457	0.039776	0.0431192	0.0378158	0.034427	0.0398314	0.0519585	0.0662247
DeltaDistanceFromCenter	SS49755	20xUAS-CsChrimson-mVenus-attP18	10sLED	AirLED	olfactoryArena1	Cam1	20191210T154542	6	0.00240359	0.00625826	0.00174795	-0.00638491	-0.00832268	-0.0124793	-0.0146178	-0.0204856	-0.024488	-0.0231234	-0.0215581	-0.0201118	-0.0169777	-0.0158673	-0.00993255	-0.000974095	0.00710705	0.00877682	-0.00157253	-0.00980647	-0.0135608	-0.0161249	-0.0189613	-0.0157014	-0.00505318	0.00669592	0.0132124	0.0133258	0.00658427	0	-0.00233076	-0.014714	-0.0169779	-0.0155178	-0.00617222	0.00494836	0.0155389	0.0268201	0.0333352	0.042763	0.0561143
DeltaDistanceFromCenter	SS49755	20xUAS-CsChrimson-mVenus-attP18	10sLED	AirLED	olfactoryArena1	Cam1	20200225T114405	6	-0.056319	-0.0525772	-0.049217	-0.0478535	-0.0429799	-0.0404719	-0.040913	-0.0423747	-0.0408828	-0.0383935	-0.0383011	-0.0398081	-0.0389926	-0.0398867	-0.04598	-0.0474583	-0.0457328	-0.04588	-0.049404	-0.0475462	-0.0412199	-0.0298267	-0.0208621	-0.00970215	-0.000891464	0.00254288	0.00220233	-0.00108422	0.000957934	0	-0.00293158	-0.0133769	-0.0175304	-0.013344	-0.0105147	-0.0115915	-0.0144802	-0.0178642	-0.0224637	-0.0307685	-0.0326057
Cos(Upwind)	SS49755	20xUAS-CsChrimson-mVenus-attP18	10sLED	AirLED	Arena2	Cam0	20191210T154323	6	-0.0567036	-0.0287256	-0.00233003	-0.0260431	-0.0962192	-0.110116	-0.119612	-0.0690614	-0.0466328	-0.0348745	-0.0991353	-0.109505	-0.081834	-0.0230085	-0.00744325	-0.0080049	-0.0636322	-0.0533116	-0.0545681	-0.0781714	-0.0742503	-0.0495659	-0.00765858	0.0318794	-0.00142523	-0.0432359	-0.10523	-0.0743861	-0.0568468	-0.0187705	0.0174991	0.0954133	0.0888301	0.0228343	-0.0427639	0.00269445	0.0775794	0.0863409	-0.0307095	-0.0922041	-0.0668449
Cos(Upwind)	SS49755	20xUAS-CsChrimson-mVenus-attP18	10sLED	AirLED	Arena2	Cam0	20200225T112947	6	-0.0437162	-0.163467	-0.124006	-0.141006	-0.14941	-0.167652	-0.171563	-0.149011	-0.13066	-0.156371	-0.165094	-0.201702	-0.171354	-0.148514	-0.162479	-0.191013	-0.17068	-0.0842632	-0.0553921	0.0163679	0.0380994	-0.0110234	-0.039589	-0.0513088	-0.108648	-0.141132	-0.152041	-0.131442	-0.136123	-0.188454	-0.213081	-0.16265	-0.079406	0.0103506	0.0837663	0.131693	0.090159	0.0777973	-0.0212848	-0.045944	-0.0177813
Cos(Upwind)	SS49755	20xUAS-CsChrimson-mVenus-attP18	10sLED	AirLED	Arena2	Cam1	20191210T154323	6	-0.0254877	-0.0472933	-0.0654498	-0.0611493	-0.0694219	-0.0885659	-0.208512	-0.196953	-0.105749	-0.0170182	-0.041844	-0.120573	-0.094359	-0.0765041	-0.0722234	-0.0439787	-0.0454935	-0.0580194	-0.0835072	-0.00789991	-0.0310485	0.00347575	0.00119895	-0.0217404	-0.052957	-0.111025	-0.0317791	0.0146785	0.0849851	0.0439909	0.00188392	-0.0142143	-0.0148258	0.0192761	0.0257237	0.0289211	-0.021111	-0.0496703	-0.0421975	-0.0872965	-0.0781919
Cos(Upwind)	SS49755	20xUAS-CsChrimson-mVenus-attP18	10sLED	AirLED	Arena2	Cam1	20200225T112947	6	-0.0429196	-0.0950021	-0.0496665	-0.0203397	-0.0433332	-0.000240424	0.00182152	-0.017837	-0.0385025	-0.0627557	-0.117984	-0.10866	-0.126283	-0.0970865	-0.0424441	-0.0208744	-0.0816996	-0.0757728	-0.0758886	-0.0841205	-0.107295	-0.115372	-0.11849	-0.0617433	-0.032694	-0.0637263	-0.126723	-0.146762	-0.15724	-0.200535	-0.183392	-0.0974106	0.0159547	0.0397332	0.0313693	-0.000700356	0.101662	0.163745	0.121747	0.0323982	-0.0288822
Cos(Upwind)	SS49755	20xUAS-CsChrimson-mVenus-attP18	10sLED	AirLED	olfactoryArena1	Cam0	20191206T132144	6	-0.0167534	-0.0399353	-0.0645487	-0.0396026	-0.0321034	0.00212243	0.0171749	0.0290414	0.110214	0.112734	0.0931266	0.122197	0.126316	0.0749235	0.0701706	0.075748	0.0760923	0.0873217	0.0471664	0.0080741	-0.00777875	-0.0211689	0.0681117	0.0848042	0.0785981	0.0774296	0.0614644	0.00647648	0.0116055	0.0886215	0.101313	0.0661024	0.0445408	0.0790278	0.0841519	0.0599665	0.0404031	0.0408823	0.0332056	-0.0392882	0.0306636
Cos(Upwind)	SS49755	20xUAS-CsChrimson-mVenus-attP18	10sLED	AirLED	olfactoryArena1	Cam0	20191210T154542	6	-0.026447	-0.0838285	-0.105182	-0.17423	-0.207206	-0.243248	-0.249168	-0.270232	-0.255513	-0.214825	-0.197882	-0.224344	-0.219338	-0.171415	-0.161174	-0.147995	-0.0888743	-0.105981	-0.151894	-0.104091	-0.0784012	-0.11605	-0.128468	-0.120059	-0.146133	-0.119916	-0.0917281	-0.144557	-0.15646	-0.152714	-0.128069	-0.110602	-0.0720505	-0.0318282	0.0406814	0.06503	0.138698	0.213184	0.127766	0.0717608	0.0722283
Cos(Upwind)	SS49755	20xUAS-CsChrimson-mVenus-attP18	10sLED	AirLED	olfactoryArena1	Cam0	20200225T114405	6	-0.15575	-0.147632	-0.114944	-0.133222	-0.0727191	-0.0941643	-0.0967157	-0.168608	-0.192419	-0.129455	-0.0927763	-0.114396	-0.128377	-0.192381	-0.183925	-0.14444	-0.127734	-0.126065	-0.107656	-0.0810701	-0.102772	-0.205706	-0.237678	-0.193774	-0.166574	-0.157022	-0.101677	-0.0813207	-0.0940719	-0.110361	-0.104089	-0.0758118	-0.0679155	-0.0424051	0.0699214	0.0660003	0.078492	0.0921905	0.0191677	0.00367184	-0.00735451
Cos(Upwind)	SS49755	20xUAS-CsChrimson-mVenus-attP18	10sLED	AirLED	olfactoryArena1	Cam1	20191206T132144	6	0.00183513	-0.0766427	-0.0668597	-0.0507384	0.0412796	0.108921	0.080037	0.0342872	0.0632842	0.0311399	-0.0166746	0.0180644	0.0630409	0.0911942	0.116491	0.136788	0.148414	0.114081	0.113703	0.120792	0.114448	0.0660675	0.0546893	0.041735	0.0558134	0.0598082	0.0434734	0.00548234	0.0192188	0.0268832	0.0734575	0.18033	0.223489	0.192156	0.128482	0.0931244	0.0303972	0.0186563	0.109937	0.138643	0.128706
Cos(Upwind)	SS49755	20xUAS-CsChrimson-mVenus-attP18	10sLED	AirLED	olfactoryArena1	Cam1	20191210T154542	6	-0.171889	-0.162336	-0.210106	-0.216499	-0.205964	-0.226457	-0.215663	-0.220224	-0.234618	-0.202749	-0.153632	-0.100151	-0.158094	-0.123577	-0.0316979	0.0198862	0.0199404	-0.0577747	-0.0734345	-0.112215	-0.0434316	-0.0206122	-0.0469355	-0.0362148	0.0374703	0.0134421	-0.0268784	-0.0600958	-0.101837	-0.133201	-0.0576737	0.0131133	0.0695667	0.092349	0.141504	0.111631	0.0574852	0.0579762	0.045804	0.0793876	0.0882339
Cos(Upwind)	SS49755	20xUAS-CsChrimson-mVenus-attP18	10sLED	AirLED	olfactoryArena1	Cam1	20200225T114405	6	-0.127091	-0.115562	-0.126059	-0.134842	-0.120567	-0.119126	-0.164939	-0.184506	-0.177855	-0.166836	-0.165347	-0.138344	-0.109082	-0.138532	-0.182244	-0.128199	-0.104232	-0.144315	-0.178377	-0.116832	-0.0701737	-0.0364379	-0.0510477	-0.0459182	-0.107511	-0.135253	-0.125156	-0.115261	-0.104805	-0.145972	-0.102087	-0.0621871	-0.0250791	0.0305003	0.0250075	-0.0241843	-0.0161594	-0.00424663	-0.0318466	-0.0267357	-0.0123736
DeltaAnglefroPreviousFrame	SS49755	20xUAS-CsChrimson-mVenus-attP18	10sLED	AirLED	Arena2	Cam0	20191210T154323	6	135.638	131.907	128.469	136.885	155.822	136.593	120.555	128.197	131.319	132.949	135.422	122.652	126.469	126.398	132.812	140.483	155.594	131.332	132.908	130.811	152.114	112.896	128.331	133.677	123.83	124.879	128.128	136.828	128.497	118.578	114.258	113.635	121.407	114.854	124.467	115.48	146.394	152.931	151.102	146.18	175.123
DeltaAnglefroPreviousFrame	SS49755	20xUAS-CsChrimson-mVenus-attP18	10sLED	AirLED	Arena2	Cam0	20200225T112947	6	94.4357	99.6129	91.0667	91.8733	98.9795	92.6875	92.8001	90.6647	87.7755	84.8916	86.8759	84.2029	86.7348	83.9976	84.3589	81.4236	89.4601	89.5617	94.1986	98.6179	87.4424	89.4165	88.7459	84.2055	90.4897	87.8698	89.8673	80.9972	84.2329	85.1528	90.5558	91.6374	97.1803	101.684	107.665	120.508	125.301	144.478	132.443	151.621	160.735
DeltaAnglefroPreviousFrame	SS49755	20xUAS-CsChrimson-mVenus-attP18	10sLED	AirLED	Arena2	Cam1	20191210T154323	6	75.7981	121.745	113.417	124.707	136.124	129.866	118.748	112.321	106.927	112.092	125.795	133.42	117.122	103.743	144.214	159.885	134.551	130.433	141.805	122.621	112.014	116.776	126.105	119.797	121.051	105.236	108.797	110.279	104.204	110.611	101.194	109.996	113.996	115.332	117.3	129.68	146.318	170.322	163.812	176.593	163.36
DeltaAnglefroPreviousFrame	SS49755	20xUAS-CsChrimson-mVenus-attP18	10sLED	AirLED	Arena2	Cam1	20200225T112947	6	85.9097	125.726	127.661	119.725	121.847	110.386	119.186	111.072	133.675	122.377	128.611	101.079	110.816	105.367	119.074	113.539	117.247	117.874	112.751	117.032	127.903	119.299	109.45	114.668	121.449	116.065	118.941	133.392	124.549	117.083	100.366	93.8878	100.098	110.151	114.596	128.568	130.218	134.774	150.743	163.955	159.864
DeltaAnglefroPreviousFrame	SS49755	20xUAS-CsChrimson-mVenus-attP18	10sLED	AirLED	olfactoryArena1	Cam0	20191206T132144	6	88.7459	99.3413	98.2885	102.973	113.335	110.039	107.278	104.501	104.512	95.9386	94.2232	94.5524	105.56	101.542	94.6531	102.815	95.3707	103.884	95.7828	89.4937	85.3179	96.8099	101.837	102.247	97.1507	94.766	87.2603	99.5973	99.0562	93.4461	110.173	110.813	125.543	112.142	121.771	133.283	127.373	143.389	140.746	149.821	162.208
DeltaAnglefroPreviousFrame	SS49755	20xUAS-CsChrimson-mVenus-attP18	10sLED	AirLED	olfactoryArena1	Cam0	20191210T154542	6	95.6228	112.146	94.9322	105.724	104.471	102.998	95.6971	101.435	111.164	112.797	104.085	108.234	102.902	103.478	112.312	105.068	105.665	105.025	108.128	100.983	108.79	99.5822	116.456	92.8053	103.535	94.9378	102.226	109.225	101.922	92.8384	105.365	106.649	105.814	108.385	125.507	131.968	131.474	138.217	146.372	167.405	163.94
DeltaAnglefroPreviousFrame	SS49755	20xUAS-CsChrimson-mVenus-attP18	10sLED	AirLED	olfactoryArena1	Cam0	20200225T114405	6	70.5141	91.5566	88.4644	92.0722	85.222	107.286	95.9208	84.4918	89.6848	98.083	93.6413	98.7055	75.662	86.0256	95.8874	92.2161	91.2979	83.6972	82.8837	79.1078	87.7068	97.426	81.646	90.7349	82.8689	77.3679	94.9651	79.1361	90.5956	75.9211	87.5023	81.1756	94.4425	90.6419	109.679	121.086	137.226	135.332	149.145	144.927	147.942
DeltaAnglefroPreviousFrame	SS49755	20xUAS-CsChrimson-mVenus-attP18	10sLED	AirLED	olfactoryArena1	Cam1	20191206T132144	6	88.7993	97.1283	90.4426	80.0773	94.9572	87.4525	96.6331	90.7242	87.1904	101.906	93.2442	105.765	104.657	102.476	107.568	95.8954	93.7099	100.843	92.7626	87.722	89.2519	85.8999	93.0119	93.2382	96.4597	90.6081	92.5698	89.2283	90.5893	92.891	102.279	145.183	135.397	126.748	129.018	142.24	151.466	145.466	158.889	161.581	181.803
DeltaAnglefroPreviousFrame	SS49755	20xUAS-CsChrimson-mVenus-attP18	10sLED	AirLED	olfactoryArena1	Cam1	20191210T154542	6	102.652	101.181	100.158	111.45	107.482	114.645	112.926	118.807	102.542	110.223	123.048	112.899	112.273	124.515	119.558	119.508	125.895	116.763	101.649	115.081	105.266	115.149	123.578	112.336	115.394	124.914	118.731	121.613	110.198	118.951	121.472	112.167	108.366	114.035	142.598	176.597	151.265	163.347	158.762	176.73	181.59
DeltaAnglefroPreviousFrame	SS49755	20xUAS-CsChrimson-mVenus-attP18	10sLED	AirLED	olfactoryArena1	Cam1	20200225T114405	6	60.2107	68.5814	84.5279	75.3708	71.922	71.9213	65.7625	70.7591	76.0519	72.0146	72.754	73.3893	81.1241	82.9614	77.2764	73.345	77.8241	77.9705	85.299	83.469	80.3537	86.3398	77.5023	78.77	83.2544	92.3049	84.2064	79.855	79.0259	80.5794	84.6175	96.9732	85.0842	101.4	101.387	118.361	124.18	131.304	133.71	143.956	141.602
WalkingDistanceFromPreviousFrame	SS49755	20xUAS-CsChrimson-mVenus-attP18	10sLED	AirLED	Arena2	Cam0	20191210T154323	6	2.39129	2.69433	2.8713	2.67067	2.80205	2.84521	2.88564	2.72965	2.77315	2.83677	2.81085	2.52626	2.32821	2.35344	2.5231	2.77922	2.64318	2.73468	2.6598	2.57929	2.7646	2.53611	2.61262	2.64344	2.63392	2.55095	2.60832	2.62922	2.67449	2.41429	2.54528	3.28242	3.00232	3.25609	3.01801	2.95602	3.10612	3.20875	3.28578	3.43919	3.53948
WalkingDistanceFromPreviousFrame	SS49755	20xUAS-CsChrimson-mVenus-attP18	10sLED	AirLED	Arena2	Cam0	20200225T112947	6	1.62423	1.90491	1.87559	1.7166	1.78117	1.71251	1.77492	1.94202	1.77084	1.64797	1.55861	1.59467	1.67845	1.55445	1.60013	1.65291	1.71392	1.8222	1.79548	1.85991	1.88437	1.84891	1.75819	1.66414	1.65009	1.6769	1.81164	1.72094	1.6215	1.53336	1.55982	2.7111	2.32851	2.39991	2.42053	2.52816	2.83267	2.82511	2.90276	3.16269	3.34951
WalkingDistanceFromPreviousFrame	SS49755	20xUAS-CsChrimson-mVenus-attP18	10sLED	AirLED	Arena2	Cam1	20191210T154323	6	2.1808	2.44892	2.49607	2.34351	2.51625	2.41955	2.36925	2.29663	2.18613	2.26189	2.34257	2.44437	2.49965	2.32173	2.29882	2.5643	2.73605	2.64385	2.57359	2.41624	2.5435	2.61082	2.60153	2.68475	2.59544	2.65525	2.52578	2.75518	2.43422	2.47396	3.38147	3.30953	3.18153	3.07651	3.18381	3.20466	3.56766	3.8984	3.77818	3.65536	3.75741
WalkingDistanceFromPreviousFrame	SS49755	20xUAS-CsChrimson-mVenus-attP18	10sLED	AirLED	Arena2	Cam1	20200225T112947	6	2.04774	2.32959	2.19312	2.55653	2.61649	2.34824	2.332	2.27558	2.42153	2.33447	2.39309	2.42878	2.28061	2.10099	2.20156	2.21756	2.04693	2.17681	2.30511	2.3929	2.3385	2.38063	2.1442	2.30886	2.41228	2.22733	2.31251	2.40883	2.08363	2.2578	2.7556	2.29987	2.44193	2.50636	2.77714	3.00346	3.1028	3.22894	3.28968	3.48497	3.47523
WalkingDistanceFromPreviousFrame	SS49755	20xUAS-CsChrimson-mVenus-attP18	10sLED	AirLED	olfactoryArena1	Cam0	20191206T132144	6	2.09897	2.43069	2.39691	2.42982	2.5821	2.60347	2.42915	2.52554	2.45105	2.21889	2.17566	2.20279	2.4814	2.29277	2.13794	2.37	2.3524	2.27026	2.24505	2.13088	2.0132	2.24757	2.22734	2.31901	2.21826	2.31909	2.20472	2.2051	2.36791	2.30336	2.33816	3.49123	3.97784	4.02713	3.55126	3.40533	3.51438	3.52945	3.47284	3.53678	3.63453
WalkingDistanceFromPreviousFrame	SS49755	20xUAS-CsChrimson-mVenus-attP18	10sLED	AirLED	olfactoryArena1	Cam0	20191210T154542	6	1.68349	1.72996	1.58559	1.6703	1.69773	1.74371	1.65202	1.84625	2.10321	2.04139	2.03534	1.89181	2.05292	1.90784	2.07703	2.18668	2.0663	1.959	1.87634	1.89363	1.77103	1.88029	1.73201	1.78869	1.89445	1.92601	1.87608	1.87102	1.70285	1.74779	1.83594	2.62102	3.10302	3.08003	3.058	3.11274	3.15053	3.25571	3.37796	3.55957	3.53633
WalkingDistanceFromPreviousFrame	SS49755	20xUAS-CsChrimson-mVenus-attP18	10sLED	AirLED	olfactoryArena1	Cam0	20200225T114405	6	1.58942	1.88836	2.05777	2.05618	2.1582	2.32107	1.90681	1.68659	1.76507	2.02072	1.89901	2.14147	2.08333	1.93837	1.87828	2.0578	1.83337	1.79144	1.87837	1.85152	1.86143	1.77582	1.83411	1.83369	1.8865	1.65671	1.83462	1.85435	1.89894	1.87095	1.90296	2.52096	2.25803	2.32815	2.44154	2.71813	2.86393	2.88664	3.02153	3.15968	3.20977
WalkingDistanceFromPreviousFrame	SS49755	20xUAS-CsChrimson-mVenus-attP18	10sLED	AirLED	olfactoryArena1	Cam1	20191206T132144	6	1.965	2.01541	1.96548	1.8935	1.95629	2.00683	1.94078	1.96469	1.9948	2.09038	2.17341	2.26165	2.13885	2.22188	2.24522	2.26283	2.21083	2.14158	2.08915	1.93438	1.9384	1.86553	1.84194	1.88381	1.8511	1.87772	1.96665	1.83962	1.82272	1.98553	3.3185	4.21751	4.32088	3.90149	3.66223	3.64761	4.11222	3.93599	3.89107	3.89059	3.98359
WalkingDistanceFromPreviousFrame	SS49755	20xUAS-CsChrimson-mVenus-attP18	10sLED	AirLED	olfactoryArena1	Cam1	20191210T154542	6	1.90657	2.07422	2.03033	1.82162	1.86522	1.96155	1.99496	1.84939	1.95678	2.04647	2.04562	1.9548	1.96428	1.9744	2.0877	1.94671	2.00492	2.05856	1.89454	1.80422	1.75173	2.0364	2.04697	2.17122	2.07714	1.86998	1.86868	2.06659	1.95335	1.92769	3.01048	3.16348	2.96938	3.09295	3.07765	3.3995	3.45505	3.48197	3.43267	3.46477	3.55426
WalkingDistanceFromPreviousFrame	SS49755	20xUAS-CsChrimson-mVenus-attP18	10sLED	AirLED	olfactoryArena1	Cam1	20200225T114405	6	1.40154	1.47773	1.55075	1.47802	1.47814	1.49297	1.51521	1.42013	1.33776	1.54478	1.55163	1.38988	1.39301	1.49965	1.49509	1.46987	1.49086	1.73648	1.69855	1.61336	1.51398	1.69731	1.68067	1.7166	1.66583	1.79964	1.76267	1.66788	1.44995	1.59191	2.37228	1.93733	1.87836	1.92898	2.02615	2.373	2.39388	2.44079	2.62197	2.68456	2.66349
revisit-10mmOut3mmIn-15s	SS49755	20xUAS-CsChrimson-mVenus-attP18	10sLED	AirLED	Arena2	Cam0	20191210T154323	6	0.181168	0.137179	0.115872	0.120859	0.137189	0.141708	0.158892	0.141495	0.156474	0.15641	0.153846	0.175641	0.173097	0.182051	0.173077	0.190221	0.194057	0.137179	0.137378	0.117735	0.156416	0.174165	0.191057	0.178305	0.196154	0.214103	0.210256	0.224359	0.223077	0.260256	0.292308	0.346154	0.372053	0.43343	0.430449	0.446828	0.444497	0.453042	0.432135	0.444765	0.486907
revisit-10mmOut3mmIn-15s	SS49755	20xUAS-CsChrimson-mVenus-attP18	10sLED	AirLED	Arena2	Cam0	20200225T112947	6	0.133934	0.135088	0.136842	0.148246	0.138596	0.133333	0.128947	0.117544	0.124561	0.134211	0.129825	0.148246	0.172807	0.17193	0.173684	0.187719	0.234211	0.236197	0.238596	0.269298	0.246491	0.254386	0.241228	0.253509	0.284211	0.290351	0.288596	0.285965	0.287719	0.288596	0.314912	0.34864	0.380702	0.371053	0.374561	0.364369	0.408044	0.442482	0.447869	0.431687	0.433041
revisit-10mmOut3mmIn-15s	SS49755	20xUAS-CsChrimson-mVenus-attP18	10sLED	AirLED	Arena2	Cam1	20191210T154323	6	0.142552	0.11782	0.136111	0.141098	0.148932	0.146234	0.157993	0.184295	0.131896	0.138916	0.14594	0.149867	0.174118	0.195726	0.172935	0.169817	0.170882	0.156699	0.150049	0.149861	0.168184	0.199973	0.192308	0.189702	0.172995	0.187179	0.169231	0.208974	0.283333	0.310256	0.371143	0.41276	0.406294	0.439462	0.391921	0.339337	0.357418	0.419153	0.405891	0.390381	0.386531
revisit-10mmOut3mmIn-15s	SS49755	20xUAS-CsChrimson-mVenus-attP18	10sLED	AirLED	Arena2	Cam1	20200225T112947	6	0.107962	0.109576	0.109484	0.0945803	0.0967593	0.0858728	0.0708761	0.0778268	0.079902	0.0759259	0.0955338	0.0978812	0.0930054	0.102288	0.152505	0.128961	0.122549	0.135899	0.152849	0.172386	0.179738	0.208892	0.252179	0.269227	0.281695	0.338753	0.34234	0.352559	0.361659	0.371349	0.344709	0.316053	0.328516	0.338368	0.326988	0.327888	0.391229	0.413889	0.424281	0.360429	0.321939
revisit-10mmOut3mmIn-15s	SS49755	20xUAS-CsChrimson-mVenus-attP18	10sLED	AirLED	olfactoryArena1	Cam0	20191206T132144	6	0.124802	0.12619	0.142857	0.135468	0.123762	0.102103	0.089881	0.0896825	0.126984	0.120397	0.139785	0.156459	0.146032	0.143651	0.135714	0.142857	0.149206	0.139881	0.133333	0.136572	0.119841	0.14127	0.173016	0.178011	0.193771	0.210238	0.216786	0.240787	0.271429	0.273958	0.313492	0.343841	0.369763	0.424125	0.407219	0.385689	0.38779	0.347948	0.38131	0.378757	0.373304
revisit-10mmOut3mmIn-15s	SS49755	20xUAS-CsChrimson-mVenus-attP18	10sLED	AirLED	olfactoryArena1	Cam0	20191210T154542	6	0.124437	0.131863	0.120665	0.131066	0.121507	0.0996936	0.105208	0.106716	0.11558	0.125184	0.105147	0.115564	0.123652	0.133395	0.132108	0.137533	0.154665	0.176183	0.175123	0.185294	0.209191	0.206005	0.216456	0.236029	0.241912	0.252512	0.245466	0.263113	0.28125	0.29136	0.295039	0.306127	0.327522	0.286688	0.333762	0.361247	0.394955	0.418538	0.421321	0.402323	0.392768
revisit-10mmOut3mmIn-15s	SS49755	20xUAS-CsChrimson-mVenus-attP18	10sLED	AirLED	olfactoryArena1	Cam0	20200225T114405	6	0.197884	0.184615	0.174359	0.157871	0.134615	0.108073	0.0975651	0.119431	0.124468	0.161999	0.175641	0.188462	0.184615	0.188462	0.198718	0.224558	0.205128	0.19359	0.16293	0.171795	0.170513	0.209243	0.224359	0.210256	0.20641	0.182051	0.202564	0.215385	0.266667	0.292308	0.310256	0.298718	0.326923	0.368948	0.365064	0.352981	0.351285	0.336109	0.312286	0.323825	0.343777
revisit-10mmOut3mmIn-15s	SS49755	20xUAS-CsChrimson-mVenus-attP18	10sLED	AirLED	olfactoryArena1	Cam1	20191206T132144	6	0.103751	0.102381	0.12619	0.11746	0.100794	0.103968	0.0984127	0.119048	0.153175	0.142857	0.17619	0.175397	0.162698	0.173016	0.197619	0.203968	0.201587	0.180952	0.18194	0.203175	0.219048	0.201587	0.206349	0.216667	0.223016	0.251587	0.272222	0.307937	0.342857	0.365079	0.370449	0.366667	0.463796	0.52619	0.486508	0.461521	0.475397	0.502005	0.499206	0.429365	0.410887
revisit-10mmOut3mmIn-15s	SS49755	20xUAS-CsChrimson-mVenus-attP18	10sLED	AirLED	olfactoryArena1	Cam1	20191210T154542	6	0.134631	0.0980392	0.0813725	0.0696078	0.0784314	0.077451	0.0656863	0.072549	0.0823529	0.0990196	0.105882	0.106863	0.1	0.0921569	0.102941	0.121569	0.145098	0.141176	0.124678	0.132353	0.147059	0.136275	0.158824	0.168627	0.165686	0.190196	0.204902	0.211765	0.222665	0.235445	0.296078	0.291176	0.298039	0.281373	0.322549	0.39902	0.412745	0.47549	0.457762	0.433333	0.386275
revisit-10mmOut3mmIn-15s	SS49755	20xUAS-CsChrimson-mVenus-attP18	10sLED	AirLED	olfactoryArena1	Cam1	20200225T114405	6	0.101574	0.123252	0.141667	0.132511	0.146296	0.141667	0.162963	0.176852	0.188889	0.197222	0.175	0.149074	0.155556	0.131481	0.128704	0.156481	0.153704	0.155659	0.167593	0.187037	0.188889	0.199074	0.203704	0.2289	0.271296	0.294444	0.299074	0.296296	0.313889	0.314815	0.306875	0.338889	0.315387	0.343519	0.368519	0.411111	0.378704	0.338889	0.365741	0.366667	0.368519
DeltaDistanceFromCenter	SS67221	20xUAS-CsChrimson-mVenus-attP18	10sLED	AirLED	Arena2	Cam0	20191206T170037	6	0.0336545	0.0281254	0.0304554	0.031922	0.0366629	0.0407967	0.0372123	0.0327022	0.0219747	0.0144721	-0.00166608	-0.0119526	-0.0115342	-0.00371865	0.000375136	0.0072065	0.0106599	0.0111716	0.0115809	0.0117658	0.00249758	0.0147015	0.0134855	0.0116867	0.013885	0.0146428	0.0072211	0.00497571	0.000487044	0	0.0129611	0.019997	0.0298826	0.0391797	0.0683206	0.0995491	0.119972	0.139716	0.148599	0.145748	0.150188
DeltaDistanceFromCenter	SS67221	20xUAS-CsChrimson-mVenus-attP18	10sLED	AirLED	Arena2	Cam0	20191210T111451	6	-0.0513981	-0.0449671	-0.044184	-0.0409647	-0.0337945	-0.029623	-0.0343075	-0.0363265	-0.0300213	-0.0227794	-0.0167128	-0.010727	-0.00921509	-0.0172822	-0.015064	-0.0162384	-0.0154001	-0.015876	-0.0253199	-0.0281429	-0.0335642	-0.0354613	-0.0338819	-0.0373048	-0.028183	-0.0152283	-0.0127725	-0.00815941	-0.00250295	0	-0.00557485	-0.00425793	0.00779569	0.0181858	0.0272142	0.0363466	0.040474	0.0472574	0.0568424	0.0601755	0.0625579
DeltaDistanceFromCenter	SS67221	20xUAS-CsChrimson-mVenus-attP18	10sLED	AirLED	Arena2	Cam1	20191206T170037	6	-0.000309464	0.00509387	0.00646721	0.00646824	-0.000153656	-0.00805012	-0.0158149	-0.0120766	-0.00743337	-0.00154857	-0.000515279	0.00359148	0.00286995	-0.000766008	-0.00323589	-0.00220506	0.00637976	0.0112832	0.0121699	0.0123439	0.0124289	0.00672572	0.00822777	0.00978393	0.00979043	0.00745133	0.00306789	-0.00191925	-0.00430542	0	0.0061859	0.0137042	0.0176257	0.0309994	0.0424042	0.0517692	0.0649771	0.0731323	0.0725321	0.0653932	0.0865387
DeltaDistanceFromCenter	SS67221	20xUAS-CsChrimson-mVenus-attP18	10sLED	AirLED	Arena2	Cam1	20191210T111451	6	-0.0103078	0.00298664	0.0229585	0.0213681	0.00917097	0.0117965	0.011435	-0.00244794	0.00653827	0.0207422	0.0222425	0.0198547	0.0167685	0.00619851	-0.0102132	-0.0177475	-0.0270218	-0.0197452	-0.011572	-0.00400478	-0.00695854	0.00144702	0.00357616	0.00284654	0.00264022	-6.9844e-05	-0.0052304	-0.00510355	-0.00661708	0	-0.00376637	0.0190288	0.0445818	0.0625227	0.0729093	0.0811783	0.088019	0.0922667	0.0934365	0.0925213	0.101236
DeltaDistanceFromCenter	SS67221	20xUAS-CsChrimson-mVenus-attP18	10sLED	AirLED	Arena2	Cam1	20201025T021546	6	0.0420061	0.0553317	0.0607315	0.0583483	0.0538397	0.0556413	0.0439454	0.0378258	0.0451618	0.0500573	0.0466988	0.0510936	0.0453645	0.0404152	0.0445634	0.0360232	0.0321423	0.0368839	0.0369857	0.0261185	0.0149652	0.0138149	-0.000405684	-0.00839315	-0.00220438	0.00504301	-0.00236638	-0.00709773	-0.00495489	0	-0.00296278	0.0190967	0.0294223	0.0277982	0.0181563	0.0202828	0.017588	0.0237169	0.0331536	0.0287253	0.0319235
DeltaDistanceFromCenter	SS67221	20xUAS-CsChrimson-mVenus-attP18	10sLED	AirLED	olfactoryArena1	Cam0	20191206T170242	6	-0.0556983	-0.0512371	-0.0480752	-0.0496696	-0.0548061	-0.0608882	-0.0566201	-0.0493518	-0.0578312	-0.0596439	-0.0568294	-0.058753	-0.0641779	-0.0668174	-0.0660341	-0.0605031	-0.05806	-0.0512244	-0.0499864	-0.0472303	-0.0384266	-0.0330908	-0.0256707	-0.018048	-0.0114155	-0.0128218	-0.0102037	-0.005208	-0.00357077	0	0.00204539	0.00240117	0.0116781	0.018125	0.0261184	0.0363118	0.0445318	0.0518332	0.0587063	0.0581814	0.067169
DeltaDistanceFromCenter	SS67221	20xUAS-CsChrimson-mVenus-attP18	10sLED	AirLED	olfactoryArena1	Cam0	20191207T064048	6	0.000837851	-0.00195507	-0.00430448	-0.00611756	-0.00829224	-0.00592232	-0.0042166	-0.0100348	-0.0123812	-0.0155512	-0.0128649	-0.0112977	-0.0136636	-0.0204469	-0.0320302	-0.0477682	-0.057613	-0.0677769	-0.0610915	-0.0472769	-0.0285979	-0.0163785	-0.00904933	-0.0114879	-0.0075637	-0.0122064	-0.0162212	-0.00572206	-0.000476433	0	0.00151469	0.00417862	0.0187542	0.0268951	0.0284622	0.0274548	0.0238655	0.0287973	0.0351553	0.038255	0.0319363
DeltaDistanceFromCenter	SS67221	20xUAS-CsChrimson-mVenus-attP18	10sLED	AirLED	olfactoryArena1	Cam0	20191210T111901	6	-0.0431903	-0.0412531	-0.0404318	-0.0345445	-0.0314346	-0.0296433	-0.0291115	-0.0292257	-0.0246007	-0.0199023	-0.0186548	-0.0137854	-0.0153287	-0.0220175	-0.021778	-0.0166309	-0.0118166	-0.00917604	-0.0168537	-0.0155748	-0.0144566	-0.0130912	-0.00466695	0.00417269	0.00612264	0.00910652	0.00327051	0.00694476	0.00577609	0	-0.00176235	-0.000897788	0.0101468	0.0241545	0.0405667	0.0575817	0.0729035	0.0827739	0.0907038	0.0919822	0.0959635
DeltaDistanceFromCenter	SS67221	20xUAS-CsChrimson-mVenus-attP18	10sLED	AirLED	olfactoryArena1	Cam1	20191206T170242	6	-0.0265803	-0.0203817	-0.0168547	-0.0140025	-0.0134558	-0.0109661	-0.0120417	-0.00985117	-0.00612755	-0.00346883	-0.00346738	-0.000675022	0.00219747	0.00513953	0.00662744	0.00425143	0.00326019	0.00394464	0.00695465	0.0122212	0.0116928	0.0126328	0.0136702	0.0130363	0.0129409	0.00910459	0.00293615	0.000472403	-0.000162162	0	0.00179621	0.00983937	0.0196221	0.0271834	0.0345443	0.0382568	0.0411766	0.0474179	0.0521802	0.055616	0.0607111
DeltaDistanceFromCenter	SS67221	20xUAS-CsChrimson-mVenus-attP18	10sLED	AirLED	olfactoryArena1	Cam1	20191207T064048	6	-0.0461723	-0.0407688	-0.0437008	-0.0470221	-0.0470433	-0.0442937	-0.0421051	-0.0407792	-0.0386647	-0.0412014	-0.0415073	-0.0421773	-0.0335745	-0.032669	-0.0350658	-0.038348	-0.0448135	-0.0523421	-0.057639	-0.0550301	-0.052771	-0.0501715	-0.0530384	-0.0536636	-0.0495627	-0.0405721	-0.0259163	-0.0107385	-0.004562	0	-0.0020824	0.00517986	0.0187645	0.0367973	0.0572002	0.0733455	0.090263	0.0955611	0.0979197	0.094887	0.0853767
DeltaDistanceFromCenter	SS67221	20xUAS-CsChrimson-mVenus-attP18	10sLED	AirLED	olfactoryArena1	Cam1	20191210T111901	6	0.0117696	0.0134248	0.0141336	0.0182482	0.0219195	0.019841	0.0172602	0.0140946	0.0152745	0.0140126	0.0130124	0.0166065	0.0179241	0.0161935	0.0130706	0.0081529	0.0055318	0.0079343	0.00590686	0.00535088	0.00548127	0.00508016	0.00488818	0.00578488	0.00784526	0.0084247	0.0061506	0.00191784	0.000635549	0	9.8737e-05	0.0137484	0.0323059	0.0581265	0.0763682	0.0848792	0.0917818	0.0954825	0.0994676	0.105214	0.11103
DeltaDistanceFromCenter	SS67221	20xUAS-CsChrimson-mVenus-attP18	10sLED	AirLED	Arena2	Cam0	20201025T021546	5	0.0421695	0.0468753	0.0472253	0.0457896	0.0404322	0.0362464	0.0324686	0.0328155	0.0351704	0.0386288	0.0482232	0.0534605	0.0547286	0.0517764	0.0432298	0.0348854	0.0276974	0.021353	0.0173194	0.0134068	0.00955328	0.0083361	0.00587177	0.00287885	0.00458143	0.00408235	0.00460348	0.00710256	0.0056026	0	-0.000442695	-0.000216306	0.0157019	0.0377159	0.0669033	0.0906699	0.106783	0.12475	0.134834	0.14322	0.151167
Cos(Upwind)	SS67221	20xUAS-CsChrimson-mVenus-attP18	10sLED	AirLED	Arena2	Cam0	20191206T170037	6	-0.231608	-0.144386	-0.0601898	-0.0949478	-0.0974701	-0.115034	-0.125395	-0.12642	-0.134122	-0.136583	-0.16883	-0.180197	-0.0858824	-0.0549441	-0.128031	-0.0878963	-0.12858	-0.116737	-0.15383	-0.147335	-0.162721	-0.179027	-0.193815	-0.156777	-0.183739	-0.159928	-0.193415	-0.171077	-0.192216	-0.208605	-0.179808	-0.0587265	0.18771	0.240522	0.337247	0.342578	0.341557	0.308178	0.251298	0.229607	0.239063
Cos(Upwind)	SS67221	20xUAS-CsChrimson-mVenus-attP18	10sLED	AirLED	Arena2	Cam0	20191210T111451	6	-0.0262922	-0.00293228	0.0366213	0.000287602	-0.00555535	0.0242497	-0.00647968	0.0103708	0.081593	0.0652759	0.0354699	0.0768423	0.0122474	-0.0563125	0.0434656	0.0625916	0.0428419	0.0191955	-0.0491082	0.00265228	-0.067364	-0.0530224	-0.0311903	-0.01965	0.0972833	0.0752054	-0.0287221	0.0224294	0.00618023	-0.0890696	-0.130673	0.025865	0.219368	0.167484	0.166926	0.196362	0.169041	0.178805	0.15309	0.159838	0.139077
Cos(Upwind)	SS67221	20xUAS-CsChrimson-mVenus-attP18	10sLED	AirLED	Arena2	Cam1	20191206T170037	6	-0.0402324	-0.0431349	-0.0528238	-0.0579897	-0.0881691	-0.0292532	-0.0341371	0.00794259	0.0544312	0.0128679	0.0100046	0.00795775	0.00984484	-0.0267869	-0.00441191	-0.0168913	-0.0350518	-0.0388966	-0.0242518	-0.0350721	-0.0592841	-0.0234725	-0.0656204	-0.0916523	-0.0917074	-0.104398	-0.139045	-0.142491	-0.118174	-0.0852583	0.0730511	0.320452	0.351971	0.380834	0.384417	0.285471	0.198631	0.222495	0.151155	0.145934	0.20796
Cos(Upwind)	SS67221	20xUAS-CsChrimson-mVenus-attP18	10sLED	AirLED	Arena2	Cam1	20191210T111451	6	-0.110463	-0.129908	-0.127889	-0.11567	-0.105385	-0.0863816	-0.0790112	-0.114188	-0.0951146	-0.165192	-0.164424	-0.138667	-0.113727	-0.153164	-0.189278	-0.147332	-0.130047	-0.121691	-0.0599478	-0.0394359	-0.0586053	-0.0642113	-0.0685958	-0.110999	-0.10211	-0.076663	-0.0854126	-0.0923676	-0.0618583	-0.0418171	0.0373425	0.274859	0.317098	0.323833	0.265131	0.324517	0.302833	0.256537	0.210741	0.210056	0.18868
Cos(Upwind)	SS67221	20xUAS-CsChrimson-mVenus-attP18	10sLED	AirLED	Arena2	Cam1	20201025T021546	6	-0.0991293	-0.148603	-0.152931	-0.117805	-0.111983	-0.120726	-0.162946	-0.131955	-0.165942	-0.179733	-0.172577	-0.166477	-0.157518	-0.16021	-0.18723	-0.176833	-0.154563	-0.117602	-0.0510693	-0.0491659	-0.102179	-0.128878	-0.215928	-0.268771	-0.249198	-0.176216	-0.219488	-0.238382	-0.200531	-0.1509	-0.0584777	0.140973	0.21633	0.212803	0.228372	0.218373	0.22719	0.21064	0.184565	0.12641	0.142082
Cos(Upwind)	SS67221	20xUAS-CsChrimson-mVenus-attP18	10sLED	AirLED	olfactoryArena1	Cam0	20191206T170242	6	-0.0539334	-0.0451152	-0.0769787	-0.104801	-0.12847	-0.152569	-0.121361	-0.12198	-0.159896	-0.130855	-0.150621	-0.142295	-0.0908004	-0.105007	-0.0702823	-0.0498203	-0.0309534	-0.0708856	-0.00556392	0.0412201	0.0155656	0.0349432	0.0473853	-2.702e-06	-0.00492974	-0.0239522	-0.0259982	0.022222	0.0235468	-0.0342753	0.00493716	0.0233959	0.171123	0.245727	0.28367	0.311876	0.293124	0.272667	0.207584	0.177811	0.210694
Cos(Upwind)	SS67221	20xUAS-CsChrimson-mVenus-attP18	10sLED	AirLED	olfactoryArena1	Cam0	20191207T064048	6	-0.000567968	-0.0538223	0.022949	0.0410364	-0.0205306	0.0156274	0.040115	0.0366492	0.035687	0.0269984	0.0969092	0.0150055	-0.0531466	-0.0601239	-0.152038	-0.148133	-0.123327	-0.0741782	0.0450766	0.111842	0.122665	0.099299	0.0938496	0.0694135	0.0779875	0.0867785	0.0851271	0.149487	0.0725016	-0.011032	0.0119563	0.0944063	0.22894	0.182093	0.112743	0.0746339	0.0897724	0.155519	0.188819	0.16298	0.099439
Cos(Upwind)	SS67221	20xUAS-CsChrimson-mVenus-attP18	10sLED	AirLED	olfactoryArena1	Cam0	20191210T111901	6	-0.0762488	-0.0907123	-0.0553223	-0.0517551	-0.0404017	-0.0715391	-0.092836	-0.0929229	-0.0788385	-0.0408041	-0.0491916	-0.0586445	-0.120646	-0.11818	-0.103834	-0.0993376	-0.0645981	-0.0882446	-0.158914	-0.178823	-0.129059	-0.147817	-0.135305	-0.0703453	-0.0711026	-0.129527	-0.160429	-0.146909	-0.135176	-0.160853	-0.136928	-0.0574298	0.218374	0.291072	0.306119	0.337724	0.340413	0.271214	0.245183	0.226629	0.216677
Cos(Upwind)	SS67221	20xUAS-CsChrimson-mVenus-attP18	10sLED	AirLED	olfactoryArena1	Cam1	20191206T170242	6	-0.155643	-0.0184198	-0.0100786	-0.0223068	-0.0638906	-0.0886243	-0.120519	-0.101841	-0.0237112	-0.0610156	-0.0640277	-0.0617653	-0.0555978	-0.0411262	-0.0665461	-0.10056	-0.0829836	-0.0872558	-0.103566	-0.101844	-0.0894308	-0.0544112	-0.041693	-0.0381308	-0.023918	-0.0841037	-0.10913	-0.0639133	-0.053227	-0.0875977	0.0088219	0.235899	0.256059	0.2934	0.317639	0.303484	0.29199	0.290716	0.215777	0.20057	0.196471
Cos(Upwind)	SS67221	20xUAS-CsChrimson-mVenus-attP18	10sLED	AirLED	olfactoryArena1	Cam1	20191207T064048	6	-0.0735392	-0.00921515	-0.0563919	-0.0487552	-0.00382397	0.00542964	0.00915202	0.0226594	0.0632416	0.0406561	-0.00750802	-0.000819049	0.0397785	0.00701998	0.0119094	-0.0402765	-0.0613979	-0.0240779	-0.0183749	0.0372154	0.073416	0.0774335	0.0534016	0.0858988	0.113123	0.0995342	0.156664	0.156916	0.141151	0.143205	0.129993	0.27493	0.275398	0.29734	0.252476	0.253965	0.287604	0.281014	0.269808	0.140165	0.133287
Cos(Upwind)	SS67221	20xUAS-CsChrimson-mVenus-attP18	10sLED	AirLED	olfactoryArena1	Cam1	20191210T111901	6	-0.130317	-0.0906244	-0.0671877	-0.068463	-0.0618898	-0.0725217	-0.0916814	-0.135661	-0.129745	-0.133392	-0.133356	-0.121736	-0.174752	-0.216361	-0.200498	-0.199585	-0.180131	-0.136389	-0.13723	-0.169107	-0.172865	-0.19361	-0.194533	-0.162315	-0.144899	-0.14968	-0.164104	-0.174149	-0.16611	-0.158829	-0.0489392	0.249632	0.328134	0.398293	0.355359	0.340227	0.37842	0.35307	0.341659	0.300818	0.280491
Cos(Upwind)	SS67221	20xUAS-CsChrimson-mVenus-attP18	10sLED	AirLED	Arena2	Cam0	20201025T021546	5	-0.0323893	0.0262934	-0.00629111	-0.0525605	-0.0673294	-0.0365346	-0.0330781	-0.0130566	-0.0175021	0.0252119	0.0504588	0.0748588	0.0395273	-0.0116924	-0.0933263	-0.107798	-0.0897008	-0.0699652	-0.0584912	0.00434029	0.0797412	0.0594837	-0.0114206	-0.0515208	-0.00668312	-0.0195312	0.0304117	0.0131086	-0.0245923	0.00696433	0.0101407	0.0999126	0.287274	0.341967	0.388859	0.337415	0.343557	0.324477	0.311121	0.317501	0.276377
DeltaAnglefroPreviousFrame	SS67221	20xUAS-CsChrimson-mVenus-attP18	10sLED	AirLED	Arena2	Cam0	20191206T170037	6	113.878	93.3801	101.186	104.26	93.7266	91.9387	95.0103	102.79	118.769	112.787	109.324	116.478	118.735	115.066	103.583	104.473	97.2187	105.312	97.674	100.988	103.058	113.926	97.4675	101.111	107.256	101.319	94.7063	91.7554	96.6686	99.9285	97.1078	160.603	179.314	155.085	140.878	127.794	125.803	124.159	130.755	112.221	125.274
DeltaAnglefroPreviousFrame	SS67221	20xUAS-CsChrimson-mVenus-attP18	10sLED	AirLED	Arena2	Cam0	20191210T111451	6	114.587	111.312	98.2652	109.063	115.211	122.093	122.429	131.314	124.467	114.541	95.2732	116.401	112.548	122.425	111.083	95.9344	103.922	104.843	113.768	107.344	103.676	101.854	102.582	111.824	119.778	113.269	120.637	111.701	113.237	108.682	108.04	159.073	153.26	143.643	130.474	130.112	132.337	115.792	119.976	119.642	106.739
DeltaAnglefroPreviousFrame	SS67221	20xUAS-CsChrimson-mVenus-attP18	10sLED	AirLED	Arena2	Cam1	20191206T170037	6	96.099	98.4605	100.022	85.823	83.9544	90.9739	92.3226	94.6722	97.0239	90.8822	87.0733	95.1628	89.2866	84.674	111.677	92.6487	95.687	99.6284	106.876	96.0674	99.4441	100.384	98.4808	82.3156	98.866	92.0314	83.4171	81.571	97.8194	85.0121	150.752	161.552	155.086	138.356	138.284	126.628	132.901	119.461	111.379	111.01	132.088
DeltaAnglefroPreviousFrame	SS67221	20xUAS-CsChrimson-mVenus-attP18	10sLED	AirLED	Arena2	Cam1	20191210T111451	6	82.4966	88.3462	99.0636	102.471	100.588	94.6922	95.2355	100.314	104.421	99.94	105.579	97.9613	95.6737	92.1095	92.9544	109.316	94.0238	83.118	80.4375	99.0448	84.1524	90.28	83.8043	91.9185	72.1204	86.8344	89.7765	92.0488	93.7205	89.4902	149.703	122.371	130.354	117.494	110.229	115.229	122.949	123.994	105.109	118.248	117.855
DeltaAnglefroPreviousFrame	SS67221	20xUAS-CsChrimson-mVenus-attP18	10sLED	AirLED	Arena2	Cam1	20201025T021546	6	83.459	100.547	95.7143	121.607	97.7074	115.232	86.5523	101.465	99.2595	90.6275	116.126	110.415	107.579	90.3612	108.107	91.6946	91.2358	85.8739	73.8674	73.8834	79.1265	90.3244	86.6206	83.1941	85.0806	80.0954	90.1507	89.4429	83.2505	89.4308	158.675	176.477	138.683	136.915	126.913	105.53	96.3322	97.8528	98.7069	85.3679	83.8179
DeltaAnglefroPreviousFrame	SS67221	20xUAS-CsChrimson-mVenus-attP18	10sLED	AirLED	olfactoryArena1	Cam0	20191206T170242	6	91.4271	113.419	102.234	106.825	106.069	101.051	103.527	117.59	98.3833	111.887	105.794	99.4986	110.332	118.039	125.158	118.515	106.05	116.733	125.301	121.64	119.176	116.564	113.977	106.232	113.621	108.016	105.63	109.772	116.78	119.726	105.982	167.417	154.55	140.589	134.614	116.541	118.915	113.618	110.752	109.599	95.0918
DeltaAnglefroPreviousFrame	SS67221	20xUAS-CsChrimson-mVenus-attP18	10sLED	AirLED	olfactoryArena1	Cam0	20191207T064048	6	99.068	106.991	104.135	111.166	127.639	109.017	109.567	117.984	108.164	98.9017	132.678	103.444	112.062	115.42	115.468	106.49	117.978	121.743	104.271	117.012	102.9	100.501	96.6387	94.1527	107.779	119.758	125.142	114.436	109.599	139.487	122.92	176.493	144.858	167.27	134.384	124.071	122.901	120.801	97.0563	107.363	111.09
DeltaAnglefroPreviousFrame	SS67221	20xUAS-CsChrimson-mVenus-attP18	10sLED	AirLED	olfactoryArena1	Cam0	20191210T111901	6	95.689	90.5097	92.3825	103.725	104.778	96.6605	110.722	103.644	96.1763	102.129	92.8407	98.8119	93.2874	92.2435	102.169	86.7765	87.0226	96.9501	86.3948	91.7347	82.3539	93.7554	98.8481	93.3882	92.8431	95.8095	90.7556	108.044	105.011	100.917	96.7731	178.916	145.383	131.438	124.486	115.437	112.03	110.77	106.283	101.935	98.3794
DeltaAnglefroPreviousFrame	SS67221	20xUAS-CsChrimson-mVenus-attP18	10sLED	AirLED	olfactoryArena1	Cam1	20191206T170242	6	92.7675	95.6556	96.397	98.8279	117.999	100.317	99.5119	108.142	106.859	95.3436	99.701	103.442	99.1455	98.4832	112.18	93.6586	112.644	95.2529	92.7049	91.7116	101.924	97.0135	113.021	103.094	111.56	91.854	103.568	94.257	99.9179	92.4552	163.548	152.312	144.251	129.328	113.034	118.854	104.741	103.461	100.829	95.7048	84.7832
DeltaAnglefroPreviousFrame	SS67221	20xUAS-CsChrimson-mVenus-attP18	10sLED	AirLED	olfactoryArena1	Cam1	20191207T064048	6	95.6452	80.2396	79.5364	66.2252	81.0524	78.6625	71.9578	82.4275	76.9029	85.0679	73.7409	68.6469	81.1093	76.0799	96.3795	76.9671	79.0346	86.788	87.7696	88.3704	87.9377	78.9645	75.4443	70.0527	70.0045	72.252	85.566	78.2665	92.7634	93.2579	160.993	167.604	165.223	131.705	121.713	105.168	109.93	96.2225	108.495	95.9517	90.4742
DeltaAnglefroPreviousFrame	SS67221	20xUAS-CsChrimson-mVenus-attP18	10sLED	AirLED	olfactoryArena1	Cam1	20191210T111901	6	80.7063	78.1627	73.3106	79.2051	73.7183	73.8487	78.5135	89.8553	89.2477	77.1326	88.103	77.0148	81.2434	77.2939	79.9762	88.1612	90.1136	90.1216	89.4884	86.0958	79.6064	84.1109	85.2594	87.759	84.4725	85.8146	89.2211	84.1516	92.5083	87.7224	166.875	153.435	128.697	119.679	112.087	105.092	99.5719	96.4666	105.301	92.3748	82.269
DeltaAnglefroPreviousFrame	SS67221	20xUAS-CsChrimson-mVenus-attP18	10sLED	AirLED	Arena2	Cam0	20201025T021546	5	71.7807	76.5888	79.041	88.0351	69.3843	76.9102	81.795	71.5155	74.9196	78.6311	76.6563	89.8389	98.4316	96.355	85.1265	89.3693	89.7368	84.3696	94.9506	89.3501	85.8189	92.6396	87.3104	81.6962	74.7489	68.9384	83.8937	88.0418	80.2691	81.3068	76.4467	137.617	120.987	135.046	124.175	111.136	100.77	96.1959	99.5615	105.139	81.6524
WalkingDistanceFromPreviousFrame	SS67221	20xUAS-CsChrimson-mVenus-attP18	10sLED	AirLED	Arena2	Cam0	20191206T170037	6	1.59469	1.87995	1.75865	1.85778	1.7746	1.73311	1.62436	1.81735	1.87348	1.89167	1.88411	1.92622	2.03227	1.96434	1.86969	1.71147	1.77138	1.75594	1.64621	1.7018	1.75267	1.82075	1.80588	1.7301	1.76311	1.76585	1.56284	1.54782	1.79647	1.70899	1.79027	1.91717	1.96403	2.50717	2.38094	2.19097	2.15212	1.91941	1.89657	1.7176	1.78625
WalkingDistanceFromPreviousFrame	SS67221	20xUAS-CsChrimson-mVenus-attP18	10sLED	AirLED	Arena2	Cam0	20191210T111451	6	2.1581	2.46511	2.28164	2.35738	2.55771	2.62215	2.60665	2.81588	2.50174	2.78579	2.57956	2.52541	2.48195	2.33381	2.13468	2.25381	2.16596	2.29656	2.36648	2.17143	2.22133	2.38611	2.34262	2.45709	2.62857	2.61561	2.33786	2.07801	2.26189	2.22413	2.47784	2.13005	1.68436	1.98802	2.09996	1.85066	1.71974	1.60971	1.55009	1.33663	1.41747
WalkingDistanceFromPreviousFrame	SS67221	20xUAS-CsChrimson-mVenus-attP18	10sLED	AirLED	Arena2	Cam1	20191206T170037	6	1.3016	1.51809	1.59846	1.47126	1.43138	1.47379	1.7287	1.5795	1.61941	1.45484	1.27646	1.36932	1.56326	1.4092	1.40302	1.60082	1.63178	1.72081	1.7128	1.5072	1.61733	1.58572	1.64063	1.503	1.46694	1.54211	1.62389	1.70085	1.80567	1.81988	1.75855	1.83086	2.35781	2.47044	2.1522	1.84711	1.83051	1.75528	1.58517	1.53811	1.67648
WalkingDistanceFromPreviousFrame	SS67221	20xUAS-CsChrimson-mVenus-attP18	10sLED	AirLED	Arena2	Cam1	20191210T111451	6	2.12249	2.39446	2.39181	2.4912	2.46178	2.37125	2.33273	2.46728	2.37259	2.06622	2.30166	2.2709	2.08054	2.10182	2.27434	2.06165	2.12275	1.88991	2.01267	2.09038	2.04907	2.22857	2.1502	2.18652	2.15256	2.04331	1.98519	2.32878	2.45679	2.36445	2.00296	1.63857	2.06401	2.02044	1.72026	1.62356	1.6873	1.75335	1.56845	1.50575	1.65603
WalkingDistanceFromPreviousFrame	SS67221	20xUAS-CsChrimson-mVenus-attP18	10sLED	AirLED	Arena2	Cam1	20201025T021546	6	1.43363	1.84614	1.77801	1.76377	1.54862	1.65005	1.48365	1.41545	1.65598	1.49528	1.67646	1.79108	1.85275	1.70652	1.52469	1.62645	1.25475	1.43374	1.32585	1.35519	1.23068	1.25761	1.23006	1.27493	1.38747	1.35653	1.44735	1.45414	1.46493	1.50423	1.66772	1.38393	1.69258	1.7177	1.53785	1.40633	1.25428	1.22347	1.34553	1.35632	1.16283
WalkingDistanceFromPreviousFrame	SS67221	20xUAS-CsChrimson-mVenus-attP18	10sLED	AirLED	olfactoryArena1	Cam0	20191206T170242	6	1.50629	1.75525	1.53679	1.62626	1.54472	1.6299	1.62323	1.61821	1.62126	1.76816	1.63094	1.57618	1.71226	1.92983	1.97759	1.80612	1.70535	1.58526	1.80043	1.65283	1.65552	1.84362	1.83979	1.77537	1.76135	1.64336	1.8112	1.57421	1.56266	1.85829	1.81121	2.08055	1.66232	1.98823	1.93848	1.77932	1.5984	1.63996	1.68458	1.65253	1.4783
WalkingDistanceFromPreviousFrame	SS67221	20xUAS-CsChrimson-mVenus-attP18	10sLED	AirLED	olfactoryArena1	Cam0	20191207T064048	6	1.65128	1.8736	1.81814	1.82343	1.67053	1.88007	1.72402	2.04875	2.18362	2.01383	2.2333	2.3638	2.2301	1.96427	1.98711	2.02653	1.8602	2.07654	2.25317	2.38016	2.09369	2.01367	1.94065	1.7198	1.84988	2.0194	2.13221	2.19041	2.02341	2.15734	1.95006	2.00469	1.5752	2.17183	2.04557	1.80303	1.78242	1.59252	1.40241	1.34546	1.41495
WalkingDistanceFromPreviousFrame	SS67221	20xUAS-CsChrimson-mVenus-attP18	10sLED	AirLED	olfactoryArena1	Cam0	20191210T111901	6	1.39616	1.44718	1.54356	1.70041	1.75498	1.80928	1.78624	1.82418	1.64844	1.8437	1.83949	1.65621	1.68802	1.55784	1.55369	1.582	1.42394	1.57741	1.63365	1.65842	1.7801	1.90594	1.73185	1.7712	1.79352	1.71124	1.58132	1.66502	1.85835	1.70334	1.70424	1.98588	1.65943	1.97921	2.0509	1.85692	1.68605	1.453	1.52634	1.56586	1.4762
WalkingDistanceFromPreviousFrame	SS67221	20xUAS-CsChrimson-mVenus-attP18	10sLED	AirLED	olfactoryArena1	Cam1	20191206T170242	6	1.17733	1.47117	1.38481	1.3914	1.45538	1.41914	1.38195	1.45589	1.43578	1.35481	1.29908	1.38173	1.27963	1.26285	1.41535	1.2632	1.19084	1.24219	1.17097	1.0791	1.32914	1.30598	1.16153	1.08799	1.21017	1.19698	1.33914	1.17104	1.26781	1.37297	1.56507	1.53899	1.76649	1.62455	1.53947	1.57641	1.34763	1.25188	1.16321	1.16501	1.1716
WalkingDistanceFromPreviousFrame	SS67221	20xUAS-CsChrimson-mVenus-attP18	10sLED	AirLED	olfactoryArena1	Cam1	20191207T064048	6	1.36727	1.62646	1.79509	1.68601	1.85023	1.7263	1.62507	1.82812	1.70419	1.65446	1.7214	1.64082	1.50409	1.36043	1.61346	1.78999	1.65127	1.8855	1.94419	1.74023	1.67898	1.58981	1.58128	1.59492	1.74198	1.7262	1.71591	1.59734	1.69727	1.50858	2.32073	1.90491	2.34354	2.15747	2.20329	1.90099	1.6628	1.69104	1.62002	1.67904	1.50221
WalkingDistanceFromPreviousFrame	SS67221	20xUAS-CsChrimson-mVenus-attP18	10sLED	AirLED	olfactoryArena1	Cam1	20191210T111901	6	0.948233	1.21728	1.21212	1.27094	1.21023	1.21252	1.21683	1.27647	1.19557	1.18897	1.18981	1.16334	1.12343	1.16172	1.26141	1.22002	1.16487	1.33882	1.24719	1.07454	1.20121	1.2569	1.10029	1.20697	1.26943	1.25377	1.34311	1.17979	1.22224	1.2554	1.77712	1.55904	1.85782	2.0279	1.72584	1.59529	1.3295	1.3235	1.25275	1.25591	1.22333
WalkingDistanceFromPreviousFrame	SS67221	20xUAS-CsChrimson-mVenus-attP18	10sLED	AirLED	Arena2	Cam0	20201025T021546	5	1.17589	1.35785	1.45742	1.66438	1.4103	1.4257	1.61175	1.44481	1.49852	1.66656	1.47686	1.42356	1.56619	1.50408	1.32154	1.30423	1.43123	1.37716	1.46481	1.41315	1.38058	1.65087	1.55558	1.45419	1.38473	1.45335	1.4014	1.57858	1.59098	1.67416	1.54527	1.73825	1.57954	2.04283	2.02861	1.83563	1.69153	1.46372	1.39455	1.3239	1.18134
revisit-10mmOut3mmIn-15s	SS67221	20xUAS-CsChrimson-mVenus-attP18	10sLED	AirLED	Arena2	Cam0	20191206T170037	6	0.157408	0.153377	0.149017	0.147631	0.120818	0.123514	0.117531	0.139434	0.159041	0.166918	0.164783	0.148881	0.161738	0.139019	0.154434	0.128637	0.121029	0.110267	0.116361	0.0892776	0.110794	0.135722	0.125672	0.125294	0.114881	0.119475	0.107735	0.106459	0.0782512	0.0650479	0.0540912	0.0738926	0.0751975	0.0904611	0.0884231	0.0905763	0.105795	0.120098	0.108722	0.117258	0.108694
revisit-10mmOut3mmIn-15s	SS67221	20xUAS-CsChrimson-mVenus-attP18	10sLED	AirLED	Arena2	Cam0	20191210T111451	6	0.099628	0.0966667	0.116667	0.126667	0.133333	0.12	0.108333	0.12	0.151667	0.163333	0.185	0.225	0.183333	0.168333	0.166667	0.158333	0.186667	0.175	0.12	0.085	0.0733333	0.0616667	0.065	0.05	0.0786195	0.0918182	0.08367	0.101667	0.118333	0.136667	0.115	0.145	0.131667	0.146667	0.138333	0.188333	0.195	0.186667	0.216667	0.216667	0.216667
revisit-10mmOut3mmIn-15s	SS67221	20xUAS-CsChrimson-mVenus-attP18	10sLED	AirLED	Arena2	Cam1	20191206T170037	6	0.130751	0.143661	0.124493	0.132747	0.136668	0.132509	0.142671	0.141524	0.148477	0.131185	0.145135	0.156367	0.141009	0.152568	0.150881	0.174342	0.180735	0.179279	0.173676	0.162255	0.132846	0.11747	0.0954823	0.103858	0.11163	0.0912336	0.106894	0.116616	0.113706	0.0960503	0.126001	0.12739	0.116123	0.098086	0.120817	0.0871217	0.126728	0.1479	0.172777	0.204617	0.21353
revisit-10mmOut3mmIn-15s	SS67221	20xUAS-CsChrimson-mVenus-attP18	10sLED	AirLED	Arena2	Cam1	20191210T111451	6	0.0826205	0.118346	0.138247	0.163466	0.191377	0.159352	0.155712	0.149427	0.126227	0.136092	0.134632	0.119108	0.121958	0.0803606	0.127051	0.116458	0.0933513	0.11284	0.128182	0.161767	0.173266	0.140612	0.0987628	0.098165	0.118636	0.129613	0.0848379	0.0933682	0.139891	0.15948	0.126107	0.133207	0.111263	0.104318	0.132215	0.118375	0.136153	0.110654	0.120724	0.131084	0.152906
revisit-10mmOut3mmIn-15s	SS67221	20xUAS-CsChrimson-mVenus-attP18	10sLED	AirLED	Arena2	Cam1	20201025T021546	6	0.0792969	0.0819228	0.0979435	0.0853241	0.0765634	0.077849	0.0594026	0.0734178	0.0730805	0.0842766	0.0790248	0.0966044	0.102762	0.0829715	0.0736539	0.098218	0.0949341	0.0776763	0.0634047	0.0794284	0.0809336	0.0836725	0.0851204	0.0742579	0.0866892	0.095708	0.0877327	0.085935	0.0863579	0.0526076	0.0663221	0.0754126	0.0887411	0.0603967	0.0517051	0.0628912	0.0591396	0.0559161	0.0732556	0.0909677	0.105748
revisit-10mmOut3mmIn-15s	SS67221	20xUAS-CsChrimson-mVenus-attP18	10sLED	AirLED	olfactoryArena1	Cam0	20191206T170242	6	0.147645	0.130323	0.137937	0.135004	0.122018	0.123186	0.0994963	0.0965849	0.132504	0.141754	0.129892	0.131211	0.120141	0.131956	0.138741	0.124301	0.103701	0.0708967	0.0701143	0.0724021	0.0962882	0.108013	0.096297	0.0901563	0.0876635	0.070915	0.0762961	0.0756127	0.0801405	0.0586543	0.04246	0.0522059	0.0341299	0.0160539	0.0148284	0.0216912	0.0300245	0.0572429	0.0568677	0.0651442	0.073343
revisit-10mmOut3mmIn-15s	SS67221	20xUAS-CsChrimson-mVenus-attP18	10sLED	AirLED	olfactoryArena1	Cam0	20191207T064048	6	0.229164	0.191667	0.172222	0.133333	0.161111	0.163889	0.181262	0.148232	0.126515	0.120576	0.181944	0.184722	0.209722	0.226389	0.204167	0.180556	0.184722	0.170833	0.168172	0.220833	0.212644	0.214595	0.181944	0.204567	0.223611	0.214402	0.226389	0.204167	0.1875	0.165278	0.140278	0.128186	0.10726	0.120076	0.11148	0.132158	0.105952	0.0902778	0.123909	0.126438	0.129336
revisit-10mmOut3mmIn-15s	SS67221	20xUAS-CsChrimson-mVenus-attP18	10sLED	AirLED	olfactoryArena1	Cam0	20191210T111901	6	0.122321	0.112533	0.115798	0.102494	0.123157	0.138224	0.112908	0.117409	0.112731	0.107961	0.10267	0.106603	0.0919678	0.0928449	0.0919772	0.100788	0.111607	0.106911	0.0935733	0.0878947	0.0882628	0.0843318	0.103778	0.0894909	0.0751136	0.0712339	0.0541559	0.0621469	0.0631078	0.0490323	0.0641091	0.0648776	0.0646998	0.0707192	0.0833688	0.104624	0.110596	0.129633	0.121072	0.118681	0.133202
revisit-10mmOut3mmIn-15s	SS67221	20xUAS-CsChrimson-mVenus-attP18	10sLED	AirLED	olfactoryArena1	Cam1	20191206T170242	6	0.08192	0.0890234	0.0814815	0.0740741	0.0694444	0.0574074	0.0518519	0.0814815	0.0833333	0.0731481	0.0944444	0.106481	0.107407	0.109259	0.112963	0.0944444	0.101955	0.0925926	0.0676754	0.0481481	0.0416667	0.0416667	0.0277778	0.0185185	0.0222222	0.0416667	0.037037	0.0416667	0.0333902	0.05	0.0490741	0.0518519	0.0528036	0.0658442	0.0703704	0.0574074	0.0546296	0.05	0.0490741	0.0743637	0.062037
revisit-10mmOut3mmIn-15s	SS67221	20xUAS-CsChrimson-mVenus-attP18	10sLED	AirLED	olfactoryArena1	Cam1	20191207T064048	6	0.060716	0.0855311	0.104762	0.0959707	0.103388	0.0935897	0.107601	0.0991758	0.0972527	0.119322	0.113828	0.110623	0.114286	0.117033	0.102747	0.0972527	0.0776436	0.0608974	0.0708791	0.0693223	0.0787546	0.0822344	0.0775641	0.0850733	0.103571	0.114528	0.123352	0.100641	0.116026	0.134615	0.139909	0.130952	0.105242	0.112912	0.135806	0.163828	0.173993	0.182784	0.187179	0.20641	0.220696
revisit-10mmOut3mmIn-15s	SS67221	20xUAS-CsChrimson-mVenus-attP18	10sLED	AirLED	olfactoryArena1	Cam1	20191210T111901	6	0.110739	0.119915	0.118939	0.109091	0.0984848	0.103788	0.0893939	0.0962121	0.106061	0.105303	0.0977273	0.108333	0.105303	0.0931818	0.0681818	0.080303	0.0856441	0.0856061	0.0757576	0.0666667	0.0560606	0.0545455	0.0492424	0.0492424	0.0681818	0.0431818	0.0537879	0.0416667	0.025	0.0265152	0.0356061	0.0409506	0.0621212	0.0742424	0.103857	0.119697	0.120455	0.118939	0.114394	0.120455	0.139394
revisit-10mmOut3mmIn-15s	SS67221	20xUAS-CsChrimson-mVenus-attP18	10sLED	AirLED	Arena2	Cam0	20201025T021546	5	0.11973	0.111	0.100909	0.111304	0.109842	0.105708	0.109124	0.114107	0.102132	0.0923535	0.109559	0.114252	0.104369	0.0987409	0.0846644	0.0607971	0.0727536	0.0660145	0.059058	0.0795223	0.0834702	0.0609684	0.0562796	0.0683524	0.085	0.0771739	0.0750475	0.0775362	0.0792754	0.0843116	0.0916893	0.0826354	0.0851449	0.0589855	0.0651794	0.0714479	0.0833758	0.0796739	0.0817029	0.101209	0.104729
DeltaDistanceFromCenter	SS45234	20xUAS-CsChrimson-mVenus-attP18	10sLED	AirLED	Arena2	Cam0	20190810T113507	6	-0.0106772	-0.00498302	0.00356006	0.0112882	0.0136255	0.0197238	0.0222296	0.0277343	0.0298873	0.0326733	0.036604	0.0325073	0.0227964	0.0166095	0.0172797	0.0186551	0.0161871	0.0207261	0.0186682	0.0180807	0.0184275	0.0246764	0.030931	0.0316082	0.0251236	0.0201239	0.0147702	0.00727056	0.000579778	0	0.00163894	0.00587325	0.0129662	0.0270513	0.0428121	0.0572042	0.0636127	0.0655638	0.0687445	0.0679253	0.069347
DeltaDistanceFromCenter	SS45234	20xUAS-CsChrimson-mVenus-attP18	10sLED	AirLED	Arena2	Cam0	20190810T114439	6	-0.0019357	-0.00324584	-0.0115981	-0.0178096	-0.020606	-0.0196796	-0.0137884	-0.00703742	-0.00241535	0.00102594	0.00627423	0.0144065	0.0206237	0.0252213	0.0248772	0.0247537	0.021741	0.01877	0.0176474	0.0164385	0.0210664	0.0223498	0.0220261	0.0203142	0.0203569	0.0192713	0.0181348	0.0127462	0.00667915	0	-0.00355512	-0.00425044	0.00280572	0.0137398	0.0256923	0.0391906	0.0499904	0.0604123	0.0689418	0.0755999	0.0829534
DeltaDistanceFromCenter	SS45234	20xUAS-CsChrimson-mVenus-attP18	10sLED	AirLED	Arena2	Cam0	20190810T115615	6	0.00464302	0.00609222	0.00678893	0.0102105	0.0127916	0.00690391	-0.00652664	-0.0108316	-0.0138907	-0.0194115	-0.0229747	-0.0181886	-0.0139285	-0.0159759	-0.0140951	-0.00917966	-0.00850578	-0.00931575	-0.00262661	0.000746184	0.00249692	0.00440617	0.00700052	0.00853343	0.00844762	0.00831354	0.00826132	0.00879642	0.00512831	0	-0.00173408	0.00140614	0.0174127	0.0433936	0.0758518	0.102229	0.117338	0.124742	0.129578	0.136065	0.131086
DeltaDistanceFromCenter	SS45234	20xUAS-CsChrimson-mVenus-attP18	10sLED	AirLED	Arena2	Cam0	20190810T120744	6	0.0358879	0.0373517	0.034066	0.0296162	0.0249664	0.0235519	0.0202419	0.0138866	0.00531876	0.00293029	0.00379272	0.00573881	0.00219983	-0.00619879	-0.0110009	-0.0146136	-0.0129146	-0.00753258	-0.00866579	-0.00994205	-0.0217326	-0.0262829	-0.0209684	-0.0183996	-0.0192119	-0.0260259	-0.0244529	-0.0193737	-0.0128533	0	0.0125541	0.0230772	0.0378076	0.0574107	0.0760393	0.0846054	0.0906523	0.0933341	0.0898051	0.0891256	0.0962174
DeltaDistanceFromCenter	SS45234	20xUAS-CsChrimson-mVenus-attP18	10sLED	AirLED	Arena2	Cam0	20191205T131726	6	-0.00639999	-0.00783138	-0.0158614	-0.0208835	-0.0248367	-0.0245746	-0.0248091	-0.0247029	-0.0222857	-0.0266883	-0.0269896	-0.0293037	-0.0352467	-0.0353483	-0.0339484	-0.0293361	-0.025988	-0.0260809	-0.0272175	-0.0257858	-0.0252007	-0.0245013	-0.0240106	-0.0210748	-0.0255818	-0.0283906	-0.023478	-0.0196893	-0.0133024	0	0.0149801	0.0259635	0.0386041	0.0579816	0.0790996	0.0947788	0.108157	0.11854	0.120247	0.120559	0.119218
DeltaDistanceFromCenter	SS45234	20xUAS-CsChrimson-mVenus-attP18	10sLED	AirLED	Arena2	Cam0	20191210T161545	6	0.102313	0.0942063	0.0815366	0.0685155	0.061846	0.0685358	0.0732325	0.0734273	0.0731915	0.0696893	0.0653379	0.0683935	0.0607263	0.0511571	0.0491997	0.0463392	0.0471289	0.0499859	0.0504925	0.0509181	0.0460924	0.0371058	0.0284377	0.0211961	0.0183906	0.018751	0.0197827	0.0176493	0.00957026	0	-0.00766702	-0.00664488	0.00513551	0.0216652	0.0322376	0.0499199	0.0660394	0.0829257	0.101637	0.110337	0.120238
DeltaDistanceFromCenter	SS45234	20xUAS-CsChrimson-mVenus-attP18	10sLED	AirLED	Arena2	Cam1	20190810T113507	6	0.00865748	0.00945593	0.0116037	0.0150373	0.0110705	0.00400415	-0.00291028	-0.00336226	-0.000224315	0.00245011	0.00940083	0.0161737	0.01583	0.0164574	0.0192677	0.0194635	0.0191878	0.0161903	0.0136804	0.010402	0.00888124	0.0066184	0.00168438	-0.00177531	-0.00685739	-0.00548321	-0.000117229	0.00202162	0.00231552	0	-0.00140872	0.01245	0.0306162	0.0501801	0.0669689	0.0801224	0.0833433	0.0885579	0.0935631	0.100185	0.10248
DeltaDistanceFromCenter	SS45234	20xUAS-CsChrimson-mVenus-attP18	10sLED	AirLED	Arena2	Cam1	20190810T114439	6	0.00909633	0.0177357	0.023438	0.030955	0.0340682	0.0342497	0.0365557	0.0388341	0.0388562	0.0418017	0.0420633	0.0414233	0.0419222	0.0410644	0.0372006	0.0393913	0.0405469	0.0408801	0.0399243	0.035399	0.0276951	0.0222158	0.0209059	0.0221785	0.0193533	0.0172982	0.0102183	0.00706597	-2.8234e-05	0	-0.00209269	0.00451326	0.00994938	0.0146693	0.0226159	0.0302498	0.0379603	0.0404446	0.0435234	0.0452115	0.0469115
DeltaDistanceFromCenter	SS45234	20xUAS-CsChrimson-mVenus-attP18	10sLED	AirLED	Arena2	Cam1	20190810T115615	6	-0.0494387	-0.0386191	-0.0281363	-0.0169203	-0.0208186	-0.0148069	-0.0065157	-0.00972527	-0.0170234	-0.0161546	-0.00490464	-6.3564e-05	0.00122027	-0.00363083	-0.0169798	-0.0194703	-0.0109037	-0.00582467	-0.00224222	-0.00276021	-0.000260784	0.00641041	0.00807907	0.00591212	0.00457653	-0.00122511	-0.00298216	-7.012e-05	0.00425489	0	0.00160538	0.0124794	0.0346206	0.065598	0.0932565	0.106819	0.120936	0.138945	0.155116	0.168251	0.166725
DeltaDistanceFromCenter	SS45234	20xUAS-CsChrimson-mVenus-attP18	10sLED	AirLED	Arena2	Cam1	20190810T120744	6	0.0278911	0.0294588	0.0316018	0.0318176	0.0243149	0.0315477	0.0409287	0.0451768	0.0450227	0.0479559	0.0504909	0.0545043	0.0603308	0.0638127	0.0660418	0.0627442	0.0622783	0.0602102	0.0611271	0.0603605	0.0537134	0.0498161	0.0424976	0.0363443	0.0285254	0.02319	0.0143691	0.0050855	-0.00269705	0	0.00809212	0.0251377	0.0428288	0.061627	0.0816508	0.0870161	0.084881	0.0864602	0.0869686	0.0873215	0.0917617
DeltaDistanceFromCenter	SS45234	20xUAS-CsChrimson-mVenus-attP18	10sLED	AirLED	Arena2	Cam1	20191205T131726	6	0.00640048	0.00960799	0.00642502	-0.000126099	-0.00428533	-0.0107256	-0.0144174	-0.0176614	-0.0181006	-0.0149804	-0.0160556	-0.00962141	-0.00942906	-0.00903502	-0.00406503	-0.00495417	2.45e-07	0.0054768	0.00737495	0.00678076	0.0030927	-0.00182754	-0.00206066	-0.00278775	-0.00734805	-0.0123003	-0.0045608	-0.00128402	-0.00193719	0	0.00161918	0.00787034	0.0138071	0.027311	0.0438117	0.047229	0.0577611	0.0609783	0.0633856	0.0674882	0.0664792
DeltaDistanceFromCenter	SS45234	20xUAS-CsChrimson-mVenus-attP18	10sLED	AirLED	Arena2	Cam1	20191210T161545	6	-0.0454796	-0.048854	-0.0516338	-0.0487293	-0.0406943	-0.0361648	-0.033461	-0.0268779	-0.0172239	-0.0140854	-0.00309259	0.0018183	0.00512243	0.00962861	0.00636419	0.0012215	-0.00763499	-0.0106344	-0.0160873	-0.00849551	-0.0108257	-0.00800533	-0.00721043	-0.0113325	-0.00559724	-0.0107479	-0.0109994	-0.00766322	-0.00735639	0	-0.00835915	-0.00639855	0.00343079	0.0242523	0.0375898	0.0438606	0.0546572	0.0701803	0.0766327	0.0789879	0.0711746
DeltaDistanceFromCenter	SS45234	20xUAS-CsChrimson-mVenus-attP18	10sLED	AirLED	olfactoryArena1	Cam0	20191205T131857	6	-0.00465607	-0.00491845	-0.0100935	-0.0169196	-0.0228745	-0.0250896	-0.026483	-0.0323249	-0.0351076	-0.0370832	-0.0361687	-0.0362999	-0.0379361	-0.0431375	-0.042836	-0.0327688	-0.023937	-0.018254	-0.0144978	-0.00607865	0.000313251	0.00422162	0.00372687	0.00276984	0.00633594	0.00491441	0.00729537	0.00521786	0.00149054	0	-0.00112934	0.000575097	0.00886669	0.0150304	0.0257178	0.0386274	0.0459991	0.0533538	0.059106	0.0636504	0.0648578
DeltaDistanceFromCenter	SS45234	20xUAS-CsChrimson-mVenus-attP18	10sLED	AirLED	olfactoryArena1	Cam1	20191205T131857	6	0.0171991	0.0185851	0.0234957	0.0292275	0.0317667	0.0330487	0.0313045	0.0304528	0.0206147	0.00802371	0.00563487	0.0135437	0.0197612	0.0223783	0.0224474	0.0213949	0.0246622	0.0313962	0.0311492	0.027765	0.0252979	0.0204608	0.0203265	0.0197085	0.0195787	0.0126542	0.00428845	0.000875613	-0.000609938	0	-0.00259157	0.0052034	0.0218313	0.039404	0.06019	0.0775959	0.0947351	0.108759	0.114914	0.117142	0.116991
Cos(Upwind)	SS45234	20xUAS-CsChrimson-mVenus-attP18	10sLED	AirLED	Arena2	Cam0	20190810T113507	6	-0.0794431	-0.0691898	-0.0938413	-0.166994	-0.180239	-0.182677	-0.226658	-0.221529	-0.185696	-0.153341	-0.112198	-0.196471	-0.251184	-0.190939	-0.144235	-0.12252	-0.115076	-0.0996598	-0.12474	-0.123407	-0.106184	-0.0713141	-0.0704333	-0.0745473	-0.122447	-0.119053	-0.170737	-0.215877	-0.135033	-0.110599	-0.104687	-0.024357	0.0952461	0.229729	0.221055	0.186574	0.123568	0.0913241	0.101952	0.0899141	0.0805553
Cos(Upwind)	SS45234	20xUAS-CsChrimson-mVenus-attP18	10sLED	AirLED	Arena2	Cam0	20190810T114439	6	-0.262334	-0.331275	-0.348952	-0.306994	-0.275833	-0.233687	-0.213858	-0.222282	-0.246593	-0.269194	-0.239057	-0.193774	-0.176703	-0.172762	-0.231953	-0.264618	-0.284642	-0.271549	-0.262525	-0.270477	-0.232936	-0.247594	-0.270684	-0.259356	-0.23596	-0.252475	-0.254514	-0.257458	-0.253862	-0.276712	-0.263672	-0.234244	-0.0373328	0.0881571	0.170716	0.175456	0.139733	0.143801	0.13368	0.081898	0.0835862
Cos(Upwind)	SS45234	20xUAS-CsChrimson-mVenus-attP18	10sLED	AirLED	Arena2	Cam0	20190810T115615	6	-0.182019	-0.196442	-0.191421	-0.160352	-0.143634	-0.198382	-0.228251	-0.182417	-0.148451	-0.166924	-0.156057	-0.0877246	-0.100482	-0.150807	-0.136432	-0.106313	-0.121824	-0.104192	-0.093052	-0.139805	-0.125762	-0.141331	-0.107288	-0.105363	-0.138247	-0.180908	-0.188466	-0.141164	-0.144152	-0.167875	-0.164126	-0.00235671	0.320736	0.376629	0.346079	0.328631	0.270585	0.199239	0.128272	0.0416826	-0.0249731
Cos(Upwind)	SS45234	20xUAS-CsChrimson-mVenus-attP18	10sLED	AirLED	Arena2	Cam0	20190810T120744	6	-0.187323	-0.187499	-0.172541	-0.171712	-0.177496	-0.177919	-0.214055	-0.233775	-0.20733	-0.222291	-0.214945	-0.192267	-0.164537	-0.182073	-0.166538	-0.157104	-0.135787	-0.131591	-0.175464	-0.135995	-0.167535	-0.183157	-0.108361	-0.101802	-0.164481	-0.155549	-0.125692	-0.118908	-0.0523107	-0.00951485	-0.0339137	0.0493409	0.227915	0.239448	0.188152	0.111637	0.074422	0.0797787	0.0926335	0.0779274	0.119866
Cos(Upwind)	SS45234	20xUAS-CsChrimson-mVenus-attP18	10sLED	AirLED	Arena2	Cam0	20191205T131726	6	-0.165119	-0.182547	-0.200999	-0.152955	-0.145964	-0.112086	-0.133192	-0.161061	-0.180143	-0.194016	-0.146096	-0.162412	-0.138859	-0.118094	-0.121502	-0.0912781	-0.0319584	-0.0477857	-0.0765762	-0.0781405	-0.12191	-0.150799	-0.128145	-0.131973	-0.139083	-0.118423	-0.0782849	-0.0984465	-0.0832579	-0.0304555	-0.0332898	0.011774	0.226754	0.337844	0.354122	0.313542	0.242398	0.239035	0.139441	0.0626565	0.0380091
Cos(Upwind)	SS45234	20xUAS-CsChrimson-mVenus-attP18	10sLED	AirLED	Arena2	Cam0	20191210T161545	6	-0.107864	-0.0662144	-0.082367	-0.148218	-0.106249	-0.0335705	-0.0519502	-0.118774	-0.106043	-0.118542	-0.101735	-0.179036	-0.243377	-0.251991	-0.199951	-0.203801	-0.133705	-0.0852004	-0.173048	-0.155104	-0.156377	-0.161586	-0.188752	-0.172983	-0.164232	-0.173542	-0.184289	-0.165531	-0.246578	-0.271821	-0.280692	-0.0868586	0.258149	0.379192	0.363622	0.343244	0.30526	0.298626	0.265632	0.284289	0.292198
Cos(Upwind)	SS45234	20xUAS-CsChrimson-mVenus-attP18	10sLED	AirLED	Arena2	Cam1	20190810T113507	6	-0.169829	-0.120799	-0.139123	-0.168175	-0.195769	-0.184779	-0.145042	-0.125114	-0.0970563	-0.087236	-0.0931881	-0.0917696	-0.13876	-0.116442	-0.126243	-0.152168	-0.184643	-0.14932	-0.0985309	-0.136042	-0.144998	-0.142143	-0.149641	-0.126496	-0.0921938	-0.0676673	-0.0781694	-0.0800593	-0.0528239	-0.0504761	-0.0314028	0.16944	0.251112	0.229307	0.170158	0.153814	0.158061	0.106125	0.0704406	0.0643385	0.0764098
Cos(Upwind)	SS45234	20xUAS-CsChrimson-mVenus-attP18	10sLED	AirLED	Arena2	Cam1	20190810T114439	6	-0.136723	-0.136313	-0.118289	-0.125214	-0.143129	-0.114165	-0.107387	-0.108401	-0.066016	-0.0389707	-0.0498884	-0.121271	-0.115699	-0.111827	-0.139268	-0.158656	-0.185474	-0.174747	-0.173808	-0.159573	-0.183271	-0.188643	-0.162194	-0.158333	-0.169895	-0.174389	-0.18947	-0.210908	-0.222856	-0.207585	-0.154513	-0.0160499	0.0253887	0.0390744	0.0531811	0.0701358	0.0732714	0.061014	0.00236382	-0.0201557	0.00180969
Cos(Upwind)	SS45234	20xUAS-CsChrimson-mVenus-attP18	10sLED	AirLED	Arena2	Cam1	20190810T115615	6	-0.0562987	-0.120113	-0.15544	-0.189747	-0.248878	-0.19098	-0.165809	-0.190428	-0.233191	-0.22978	-0.235117	-0.250431	-0.329206	-0.36355	-0.34635	-0.19821	-0.139244	-0.142428	-0.199707	-0.206321	-0.184866	-0.194665	-0.214755	-0.178737	-0.189449	-0.209749	-0.206521	-0.183671	-0.184829	-0.180765	-0.0898843	0.294396	0.340002	0.316979	0.281034	0.256405	0.2841	0.279449	0.20994	0.130911	0.0516734
Cos(Upwind)	SS45234	20xUAS-CsChrimson-mVenus-attP18	10sLED	AirLED	Arena2	Cam1	20190810T120744	6	-0.164956	-0.182465	-0.162928	-0.123999	-0.118328	-0.11421	-0.0927861	-0.0754586	-0.0652954	-0.0560742	-0.107404	-0.120512	-0.0719335	-0.07986	-0.0869274	-0.12218	-0.115283	-0.145737	-0.129218	-0.109469	-0.124275	-0.158065	-0.216925	-0.210718	-0.209697	-0.208961	-0.221459	-0.180958	-0.130429	-0.100648	0.0418823	0.217183	0.214866	0.231335	0.181631	0.0431201	-0.0287955	-0.0383298	-0.0740864	-0.0342974	-0.0334866
Cos(Upwind)	SS45234	20xUAS-CsChrimson-mVenus-attP18	10sLED	AirLED	Arena2	Cam1	20191205T131726	6	-0.0800711	-0.170207	-0.164084	-0.16465	-0.188455	-0.208131	-0.17858	-0.196358	-0.17834	-0.185704	-0.135253	-0.103772	-0.132238	-0.113122	-0.10002	-0.135842	-0.117817	-0.0873639	-0.11381	-0.104008	-0.107049	-0.162774	-0.142958	-0.17014	-0.166541	-0.156581	-0.107325	-0.108631	-0.119822	-0.104896	-0.0787755	0.0687718	0.138458	0.18667	0.190854	0.218061	0.181984	0.119025	0.0811876	0.118917	0.115555
Cos(Upwind)	SS45234	20xUAS-CsChrimson-mVenus-attP18	10sLED	AirLED	Arena2	Cam1	20191210T161545	6	-0.106683	-0.177255	-0.156438	-0.162566	-0.124218	-0.0796384	-0.0951163	-0.0514566	-0.067332	-0.157738	-0.144443	-0.171906	-0.187553	-0.176803	-0.181227	-0.183456	-0.18229	-0.173525	-0.229156	-0.180781	-0.152617	-0.129257	-0.149889	-0.191034	-0.182106	-0.203433	-0.228222	-0.231095	-0.231374	-0.245158	-0.12741	0.105655	0.18584	0.291538	0.282337	0.212957	0.240486	0.214221	0.155513	0.0819136	0.0854561
Cos(Upwind)	SS45234	20xUAS-CsChrimson-mVenus-attP18	10sLED	AirLED	olfactoryArena1	Cam0	20191205T131857	6	-0.22821	-0.268995	-0.328132	-0.302529	-0.264653	-0.245233	-0.240879	-0.234743	-0.244797	-0.225781	-0.199865	-0.188476	-0.193194	-0.202519	-0.157018	-0.100518	-0.122324	-0.105102	-0.114698	-0.116847	-0.132539	-0.0905097	-0.119029	-0.105923	-0.117884	-0.15098	-0.158556	-0.186736	-0.172754	-0.161999	-0.162217	-0.0798216	0.12716	0.158147	0.218948	0.186542	0.189567	0.197208	0.145419	0.105869	0.0776766
Cos(Upwind)	SS45234	20xUAS-CsChrimson-mVenus-attP18	10sLED	AirLED	olfactoryArena1	Cam1	20191205T131857	6	-0.0236178	-0.0193234	-0.0330629	-0.0512299	-0.0891408	-0.10011	-0.068935	-0.0990967	-0.183485	-0.189518	-0.121948	-0.0593548	-0.060771	-0.0599473	-0.0192099	-0.0473017	-0.0670157	-0.0245128	-0.0522802	-0.0467285	-0.0341389	-0.0477734	0.00277943	-0.015563	-0.0668417	-0.113657	-0.110889	-0.102256	-0.0976245	-0.0722383	-0.0352364	0.219516	0.275205	0.296189	0.362734	0.368795	0.341883	0.270894	0.150205	0.102326	0.123378
DeltaAnglefroPreviousFrame	SS45234	20xUAS-CsChrimson-mVenus-attP18	10sLED	AirLED	Arena2	Cam0	20190810T113507	6	101.748	109.228	114.462	108.823	100.557	116.3	110.28	115.764	115.643	118.113	121.135	120.649	104.943	119.565	108.63	110.535	120.44	117.048	104.696	108.207	106.24	111.008	122.474	121.812	131.952	111.818	122.466	124.313	131.091	119.901	117.639	165.473	161.463	182.87	141.929	137.642	133.645	139.207	132.87	147.459	123.141
DeltaAnglefroPreviousFrame	SS45234	20xUAS-CsChrimson-mVenus-attP18	10sLED	AirLED	Arena2	Cam0	20190810T114439	6	67.8496	57.6559	57.3452	60.5081	60.3831	62.0733	65.4261	56.0169	62.9498	68.2435	64.8952	68.5681	73.1996	61.5931	80.1982	78.4048	78.7425	65.1751	67.0049	64.3829	66.1463	73.4885	67.4762	67.3538	67.4009	72.5667	68.0613	69.2337	80.9547	73.9971	82.6652	81.1391	124.574	116.827	114.661	106.78	89.4065	93.7503	85.6446	93.2145	105.43
DeltaAnglefroPreviousFrame	SS45234	20xUAS-CsChrimson-mVenus-attP18	10sLED	AirLED	Arena2	Cam0	20190810T115615	6	123.695	125.055	122.332	114.988	127.276	138.38	133.57	125.35	124.751	141.791	128.004	132.552	125.324	118.691	131.761	131.052	127.948	126.951	126.99	124.939	134.81	133.204	123.056	120.702	117.95	121.689	136.397	121.654	117.691	112.308	121.195	177.199	176.884	173.141	144.041	129.049	133.069	158.374	142.333	135.59	142.743
DeltaAnglefroPreviousFrame	SS45234	20xUAS-CsChrimson-mVenus-attP18	10sLED	AirLED	Arena2	Cam0	20190810T120744	6	97.1722	103.54	102.588	92.2293	97.8011	94.8985	97.0585	95.7059	101.412	94.1524	113.94	96.9473	93.3388	93.8855	93.5314	102.224	96.4111	98.3359	91.7616	90.1129	113.298	109.032	110.13	102.491	116.198	113.123	92.6202	91.1474	106.611	102.705	95.8474	135.098	163.737	160.366	151.088	150.587	156.084	131.636	129.427	120.068	115.045
DeltaAnglefroPreviousFrame	SS45234	20xUAS-CsChrimson-mVenus-attP18	10sLED	AirLED	Arena2	Cam0	20191205T131726	6	110.005	118.245	95.7903	94.7274	82.3419	107.804	110.527	101.344	107.377	108.586	108.289	93.9509	98.7632	96.4304	99.7664	92.7741	105.907	107.941	109.414	104.197	96.7725	96.8243	109.207	97.3157	106.149	93.5992	115.202	118.431	105.057	100.213	106.889	150.224	157.49	145.642	126.883	134.556	121.238	129.076	137.113	127.646	125.09
DeltaAnglefroPreviousFrame	SS45234	20xUAS-CsChrimson-mVenus-attP18	10sLED	AirLED	Arena2	Cam0	20191210T161545	6	133.481	135.397	122.733	106.305	119.736	98.3992	100.614	102.791	115.427	116.244	112.581	119.982	131.036	108.697	109.182	114.241	113.608	108.648	132.383	122.774	123.514	108.979	112.625	131.657	117.458	131.032	110.044	102.721	109.83	111.654	108.623	173.36	154.929	149.955	147.773	123.598	130.322	134.855	114.086	129.918	123.463
DeltaAnglefroPreviousFrame	SS45234	20xUAS-CsChrimson-mVenus-attP18	10sLED	AirLED	Arena2	Cam1	20190810T113507	6	87.1816	101.752	106.304	105.589	112.529	102.475	110.872	109.18	101.784	102.531	113.406	114.98	102.741	110.454	110.916	106.861	103.714	106.751	111.208	116.743	107.494	110.16	100.297	106.005	98.4426	108.836	108.437	103.462	106.647	122.737	137.927	164.225	151.483	121.948	109.658	108.385	104.432	113.914	103.381	101.896	105.61
DeltaAnglefroPreviousFrame	SS45234	20xUAS-CsChrimson-mVenus-attP18	10sLED	AirLED	Arena2	Cam1	20190810T114439	6	91.0434	74.0719	78.6958	81.7091	84.5587	71.7036	69.1819	76.3348	71.9268	78.6118	81.4717	77.6721	76.3858	80.2645	78.141	72.6991	83.3422	75.5911	90.0683	78.6424	78.3748	71.12	84.4831	83.4172	75.9568	71.9313	68.9329	71.7156	69.5672	74.641	97.3335	112.368	101.932	94.0483	92.1121	76.698	81.8533	76.6187	75.7737	82.8694	78.0865
DeltaAnglefroPreviousFrame	SS45234	20xUAS-CsChrimson-mVenus-attP18	10sLED	AirLED	Arena2	Cam1	20190810T115615	6	127.566	128.01	145.9	166.478	167.649	154.697	127.3	144.827	139.818	130.719	106.128	119.807	132.518	135.571	126.525	133.138	132.058	123.899	116.627	140.638	117.395	132.022	148.202	134.37	127.602	130.174	124.168	131.938	135.484	107.965	190.639	211.122	164.028	150.463	165.038	164.497	142.652	128.683	152.374	149.788	132.327
DeltaAnglefroPreviousFrame	SS45234	20xUAS-CsChrimson-mVenus-attP18	10sLED	AirLED	Arena2	Cam1	20190810T120744	6	79.3892	89.0376	106.997	129.814	101.088	109.623	99.6908	126.769	112.994	109.707	101.027	109.292	97.9499	93.1245	93.6711	121.448	105.094	123.246	125.915	126.107	126.608	96.3338	96.8443	118.752	116.158	109.128	106.725	100.291	98.5843	90.2107	142.002	145.688	156.848	135.301	149.52	159.455	130.954	129.707	134.076	123.926	121.6
DeltaAnglefroPreviousFrame	SS45234	20xUAS-CsChrimson-mVenus-attP18	10sLED	AirLED	Arena2	Cam1	20191205T131726	6	89.3185	109.302	103.781	92.0098	94.3179	97.3527	89.4992	93.3477	94.1492	100.098	104.647	91.3325	88.8296	100.562	97.3094	102.591	103.361	100.752	101.083	97.8614	92.49	96.7538	96.8783	83.5344	90.0823	89.226	86.8302	88.3456	90.8433	93.1148	148.427	154.954	150.832	134.759	137.773	128.069	127.691	127.844	113.535	97.5213	97.5375
DeltaAnglefroPreviousFrame	SS45234	20xUAS-CsChrimson-mVenus-attP18	10sLED	AirLED	Arena2	Cam1	20191210T161545	6	89.0357	106.641	105.129	101.209	105.776	93.9549	114.968	111.628	125.011	112.124	116.39	139.605	131.492	111.517	135.354	118.581	107.151	117.226	130.965	123.902	136.54	130.36	130.043	122.818	99.3496	110.604	103.078	117.748	106.726	96.3066	152.342	168.872	135.87	135.386	128.747	115.438	109.952	103.823	107.352	119.351	110.624
DeltaAnglefroPreviousFrame	SS45234	20xUAS-CsChrimson-mVenus-attP18	10sLED	AirLED	olfactoryArena1	Cam0	20191205T131857	6	71.4006	77.1297	74.062	65.328	67.0611	71.9302	62.9012	71.7346	63.3728	81.7633	81.7774	93.7766	89.7302	90.0686	82.7022	76.7927	85.7259	81.3427	80.0139	78.5186	70.085	71.8565	72.4409	78.0354	69.6893	70.0422	78.7323	74.7851	69.4831	78.064	80.149	129.453	128.91	137.447	131.097	110.294	101.916	104.321	100.457	97.171	84.1158
DeltaAnglefroPreviousFrame	SS45234	20xUAS-CsChrimson-mVenus-attP18	10sLED	AirLED	olfactoryArena1	Cam1	20191205T131857	6	77.5236	70.113	65.6268	77.268	79.6173	76.0848	84.6283	79.7129	88.1413	72.3281	86.5766	76.3128	65.0293	79.2508	67.9798	73.2112	72.2143	73.8918	79.2363	67.4058	74.2561	72.8123	76.397	61.9763	75.8018	62.5522	79.3013	71.2183	81.4447	81.1381	161.506	130.853	154.442	136.315	138.143	154.04	123.503	121.477	108.092	99.4824	115.21
WalkingDistanceFromPreviousFrame	SS45234	20xUAS-CsChrimson-mVenus-attP18	10sLED	AirLED	Arena2	Cam0	20190810T113507	6	2.14704	2.42266	2.18414	2.07276	2.06701	2.19853	2.18366	2.20351	2.06492	2.1227	2.18804	2.06625	1.94736	2.27789	2.32776	2.23235	2.22165	2.3765	2.42139	2.42171	2.58016	2.43153	2.15473	2.15858	2.26052	2.17537	2.35135	2.38593	2.36501	2.23271	2.29801	2.16311	1.55252	2.03431	2.09492	1.97203	2.01892	2.01246	1.79777	1.79073	1.96698
WalkingDistanceFromPreviousFrame	SS45234	20xUAS-CsChrimson-mVenus-attP18	10sLED	AirLED	Arena2	Cam0	20190810T114439	6	1.30039	1.40148	1.41275	1.50773	1.44142	1.49711	1.49763	1.54463	1.41062	1.42509	1.44071	1.46638	1.49083	1.43315	1.40389	1.40456	1.55719	1.61764	1.59382	1.59721	1.52309	1.52102	1.48582	1.49827	1.42168	1.40346	1.41619	1.38986	1.54561	1.52393	1.52588	1.45735	1.22838	1.70185	1.61476	1.56516	1.58	1.29734	1.48793	1.64884	1.49805
WalkingDistanceFromPreviousFrame	SS45234	20xUAS-CsChrimson-mVenus-attP18	10sLED	AirLED	Arena2	Cam0	20190810T115615	6	2.0174	2.17509	2.07484	2.09134	2.13919	2.25646	2.59077	2.27697	2.19168	2.6182	2.52149	2.48123	2.53074	2.37722	2.39844	2.46674	2.28797	2.3314	2.12642	2.10313	2.15636	2.14015	2.13686	2.09968	2.01188	2.05493	2.1766	2.39122	2.06658	2.13207	1.97086	1.88695	1.79816	2.25492	2.46724	2.20831	1.91111	1.97254	1.95121	1.95564	1.8831
WalkingDistanceFromPreviousFrame	SS45234	20xUAS-CsChrimson-mVenus-attP18	10sLED	AirLED	Arena2	Cam0	20190810T120744	6	1.82018	2.09127	2.14706	2.06457	2.22033	2.17688	2.08213	2.21586	2.07474	2.01586	2.11197	2.23761	2.16356	2.14752	2.10123	2.1102	2.01565	2.13819	2.2123	2.1342	2.151	2.3281	2.36688	2.34947	2.23488	2.25527	2.32628	2.30321	2.26889	2.25907	2.08803	1.93173	1.5742	2.00561	1.96023	2.14158	1.76036	1.82462	1.76639	1.68832	1.81805
WalkingDistanceFromPreviousFrame	SS45234	20xUAS-CsChrimson-mVenus-attP18	10sLED	AirLED	Arena2	Cam0	20191205T131726	6	1.84425	2.05142	2.04984	2.026	1.83133	1.87979	1.9169	1.98557	1.82449	2.00657	1.99357	1.92609	2.01938	1.84679	1.85187	1.78511	2.04242	2.11474	2.08878	1.98122	1.89693	1.90831	1.7379	1.77719	2.04064	1.90601	1.96722	2.17294	2.05704	2.03377	1.96312	1.9219	1.40332	1.71343	1.74135	1.61589	1.67524	1.54624	1.58797	1.64272	1.55476
WalkingDistanceFromPreviousFrame	SS45234	20xUAS-CsChrimson-mVenus-attP18	10sLED	AirLED	Arena2	Cam0	20191210T161545	6	1.726	2.02693	2.18998	1.99881	2.03316	1.88731	2.06594	1.98568	1.95413	2.02954	1.81841	1.70522	1.77318	1.85248	1.68541	1.8568	1.86103	1.87635	1.91435	1.9706	2.01273	2.05486	2.20974	2.10218	1.97992	1.97457	1.95257	1.8112	2.00845	1.83675	1.95073	1.87833	1.60619	2.06424	2.05127	1.92455	1.9019	1.85354	1.71565	1.64783	1.66858
WalkingDistanceFromPreviousFrame	SS45234	20xUAS-CsChrimson-mVenus-attP18	10sLED	AirLED	Arena2	Cam1	20190810T113507	6	1.7116	2.00492	2.08345	1.98789	2.0148	2.1587	2.08938	2.17035	2.16305	1.97625	2.2668	2.17351	2.23489	2.15294	2.00714	2.08063	2.06925	2.13113	2.30204	2.14072	1.99545	2.00649	2.08969	2.10621	2.07357	2.09426	2.01166	2.1914	2.21274	2.29138	2.05804	1.69427	1.95447	2.24983	2.15191	2.0103	1.8159	1.87961	1.78628	1.893	1.86102
WalkingDistanceFromPreviousFrame	SS45234	20xUAS-CsChrimson-mVenus-attP18	10sLED	AirLED	Arena2	Cam1	20190810T114439	6	1.58759	1.64692	1.62231	1.67578	1.6699	1.69169	1.62423	1.53379	1.5926	1.60433	1.70043	1.62392	1.73056	1.55495	1.66292	1.64138	1.62756	1.68835	1.68935	1.75427	1.76878	1.80586	1.68575	1.78243	1.80632	1.71105	1.70928	1.7784	1.59574	1.51461	1.57546	1.40347	1.46129	1.51698	1.59715	1.45313	1.39245	1.3652	1.34999	1.36692	1.34654
WalkingDistanceFromPreviousFrame	SS45234	20xUAS-CsChrimson-mVenus-attP18	10sLED	AirLED	Arena2	Cam1	20190810T115615	6	2.45465	2.51485	3.02614	2.67714	2.62222	2.53784	2.28001	2.40692	2.31941	2.29058	1.8768	1.94628	2.06881	2.02786	2.06369	2.27856	2.3554	2.42714	2.34516	2.28279	1.86491	2.03238	2.06231	2.13425	2.05935	2.21797	2.03489	2.17772	2.59696	2.23113	2.639	2.04816	2.60225	2.89693	2.48963	2.07651	2.17035	2.11203	2.08001	2.3143	2.31465
WalkingDistanceFromPreviousFrame	SS45234	20xUAS-CsChrimson-mVenus-attP18	10sLED	AirLED	Arena2	Cam1	20190810T120744	6	2.09409	2.17545	2.58649	2.48918	2.6307	2.54637	2.61935	2.62984	2.44346	2.29822	2.27276	2.3948	2.45351	2.34648	2.34163	2.43058	2.11652	2.15599	2.27274	2.11441	2.19389	1.80679	2.10121	1.92469	1.94283	1.84471	2.01903	2.11249	2.52774	2.31436	2.27399	1.83076	2.00054	2.18441	2.00602	2.04743	1.84624	2.05283	2.11794	2.16157	2.27823
WalkingDistanceFromPreviousFrame	SS45234	20xUAS-CsChrimson-mVenus-attP18	10sLED	AirLED	Arena2	Cam1	20191205T131726	6	1.42191	1.64801	1.65313	1.43194	1.42152	1.51846	1.54759	1.63575	1.47096	1.4551	1.54493	1.56327	1.44746	1.52135	1.5143	1.4129	1.61145	1.4402	1.58795	1.44344	1.65281	1.67031	1.58734	1.42926	1.37131	1.55614	1.61291	1.46937	1.6581	1.61956	1.51487	1.33352	1.72459	1.6305	1.61833	1.39911	1.4459	1.33703	1.36877	1.21993	1.21247
WalkingDistanceFromPreviousFrame	SS45234	20xUAS-CsChrimson-mVenus-attP18	10sLED	AirLED	Arena2	Cam1	20191210T161545	6	1.41683	1.45284	1.36689	1.55098	1.70276	1.63705	1.75119	1.52798	1.60193	1.65437	1.59821	1.47881	1.52262	1.42494	1.7676	1.68398	1.45094	1.46281	1.49938	1.55511	1.54688	1.62684	1.68432	1.56673	1.48278	1.42661	1.3207	1.25044	1.39001	1.27517	1.47192	1.49197	1.88226	1.94655	1.67823	1.38138	1.388	1.25129	1.29191	1.35617	1.1828
WalkingDistanceFromPreviousFrame	SS45234	20xUAS-CsChrimson-mVenus-attP18	10sLED	AirLED	olfactoryArena1	Cam0	20191205T131857	6	1.13779	1.30224	1.28931	1.32624	1.37302	1.50959	1.33199	1.32722	1.32076	1.40369	1.41403	1.3916	1.3901	1.45628	1.47176	1.40813	1.3908	1.47488	1.32277	1.38179	1.38641	1.30361	1.15704	1.13127	1.04783	1.17496	1.21487	1.26036	1.08282	1.32949	1.33862	1.49186	1.08386	1.36185	1.41279	1.29879	1.18312	1.24252	1.25237	1.28528	1.09126
WalkingDistanceFromPreviousFrame	SS45234	20xUAS-CsChrimson-mVenus-attP18	10sLED	AirLED	olfactoryArena1	Cam1	20191205T131857	6	1.6498	1.61099	1.71037	1.81868	1.67299	1.56417	1.69904	1.82896	1.86549	1.64197	1.55634	1.7851	1.60181	1.64962	1.46722	1.5026	1.68882	1.59991	1.61912	1.53734	1.73232	1.93641	1.59681	1.36364	1.63196	1.55237	1.63328	1.56723	1.63763	1.67247	1.99683	1.20612	1.9752	1.85997	1.98785	2.01048	1.81543	1.89843	1.94329	1.82078	1.62791
[truncated: 14 more rows]
[truncated: 139 more columns]
