# Supplementary material for: Neural circuit mechanisms for transforming learned olfactory valences into wind-oriented movement
Source: eLife. 2023 Sep 18;12:e85756. doi: 10.7554/eLife.85756 (PMC10588983; doi:10.7554/eLife.85756)
Supplement: Figure 2—source data 1. [file elife-85756-fig2-data1.xlsx]

## Sheet: Sheet1
SS01126	SS01227	MB011C	SS32218	SS40549	MB002B	MB029B	SS48900	SS32244	SS00561	SS00550	MB080C	SS33909	SS32230	SS49755	MB018B	SS00623	MB043C	SS00504	MB315C	SS88953	Empty-split	MB310C	SS39541	MB036B	MB022B	SS88997	SS32228	MB213B	MB433B	SS00543	MB434B	MB109B	MB032B	SS00581	SS48899	SS41731	MB555B	SS01319	MB441B	MB112C	MB296B	SS56699	MB027B	SS45222	MB001B	MB630B	SS48882	SS00096	SS32254
-0.1252	-0.033	-0.1572	-0.0195	-0.0885	-0.0463	0.0301	0.0451	-0.012	-0.0982	-0.0253	0.0344	-0.1035	-0.0467	-0.1145	0.0513	-0.0457	-0.0098	0.0383	0.0584	-0.0431	0.0529	-0.0626	-0.0886	0.0907	0.0878	0.1708	0.0046	0.099	-0.0861	0.0789	0.0452	-0.0085	0.0717	0.0245	-0.0278	0.009	0.0498	0.0152	0.0424	0.0029	0.0478	-0.0022	-0.0559	0.0249	-0.0305	-0.0306	0.0621	-0.0287	-0.0264
-0.0903	-0.1958	-0.0207	-0.028	-0.0713	-0.0481	0.0928	-0.0208	-0.1151	-0.1259	-0.0242	0.0378	-0.0237	0.0146	-0.101	0.0218	-0.0516	-0.01	-0.0083	0.0053	0.0133	0.0158	0.0164	-0.0119	0.0451	0.1062	0.0235	0.1093	0.0347	0.0715	0.0009	-0.0305	0.0934	0.039	-0.0936	-0.0039	-0.0088	0.1484	0.0207	-0.0439	0.071	0.23	-0.0107	0.0265	0.0355	0.0423	0.0707	0.0827	0.0761	0.0767
-0.0873	-0.0928	-0.0399	-0.0174	-0.0402	-0.1218	-0.0245	-0.0664	0.092	-0.0219	-0.0076	0.1104	-0.0482	0.032	0.05	-0.0194	-0.0266	-0.0355	0.0139	0.0195	-0.0509	-0.0334	-0.0042	0.0208	-0.022	-0.0082	0.0404	0.0884	-0.0447	0.0635	0.0345	-0.0398	-0.0425	0.136	-0.0236	0.0473	0.0462	0.0899	0.0216	0.0252	0.0506	0.0728	0.0294	-0.0247	0.0681	0.1868	0.0316	0.0445	0.148	0.0607
-0.0961	0.003	-0.1774	-0.0244	-0.094	0.0605	-0.0513	-0.0112	-0.0159	0.0106	0.0031	-0.0046	0.1718	0.0105	0.0871	0.0391	0.0066	0.0526	0.0446	0.0666	0.083	0.0721	-0.0283	-0.0151	0.0126	0.057	-0.0322	0.1224	0.0235	0.0738	0.0095	0.1979	-0.0279	0.0435	0.039	0.0058	-0.0589	0.0332	-0.0584	0.1207	0.1913	0.1294	0.1096	0.0545	0.0802	-0.0167	0.0298	0.0586	0.0804	0.0708
-0.0594	-0.0876	-0.1037	-0.0257	0.0434	0.0108	0.0073	-0.0292	-0.0912	0.0031	0.073	-0.0361	0.153	-0.052	0.01	0.1004	0.0725	0.0695	0.0019	0.0262	0.0333	0.0459	0.0641	0.1597	0.0097	-0.0497	0.025	0.0293	-0.0163	-0.0034	0.0999	0.0223	0.1593	0.0518	0.0661	0.1036	0.1386	-0.0029	0.0119	0.0449	0.0113	0.0225	-0.0154	-0.0265	-0.0173	0.0271	0.0686	0.0323	0.0787	0.1687
-0.1016	-0.06	-0.033	0.0454	0.0541	-0.0243	0.0027	-0.0361	-0.0621	0.0156	0.0075	-0.0372	-0.0338	-0.0038	-0.0681	0.0683	0.0327	0.0185	0.0115	0.1113	0.0455	-0.0079	0.0232	-0.029	-0.021	-0.0354	0.057	-0.0262	0.0502	0.0182	0.0793	-0.0394	0.0662	-0.0493	0.0533	-0.0129	-0.0827	-0.0024	0.0716	0.0133	0.0591	-0.0175	0.2671	0.0322	0.02	0.0068	0.0814	0.1435	0.0935	0.0821
-0.158	-0.0829	-0.0776	-0.1227	0.0543	-0.0201	-0.068	-0.032	0.0481	-0.1601	-0.0249	-0.0381	-0.0679	-0.027	-0.1675	-0.0304	0.056	-0.0197	0.0072	-0.0196	0.0158	-0.0485	0.1031	0.0025	-0.0239	-0.004	0.0238	-0.0148	-0.0145	-0.0059	-0.0318	0.0864	0.0724	-0.0472	0.0791	0.09	0.0884	-0.0365	0.0563	0.0216	0.1693	-0.0516	0.0806	0.2141	-0.0423	0.1532	0.0746	0.0275	0.0038	0.0688
0.0854	-0.01	0.03	-0.0246	0.1042	-0.0313	-0.0012	-0.0544	0.0342	-0.0197	-0.0184	0.1762	0.0315	0.0386	0.1961	0.038	-0.0601	0.0029	0.042	0.0462	0.003	-0.0944	0.0633	0.0255	0.0974	-0.0205	0.0712	-0.0273	0.0876	0.0519	0.0067	0.1252	0.0912	0.1343	0.1719	0.0728	-0.0232	0.0689	0.0682	0.0365	-0.0127	0.0163	0.032	0.1424	0.0292	0.0326	0.13	0.0505	-0.0018	0.0663
-0.1038	-0.0289	-0.024	-0.0975	0.0519	-0.0324	-0.0242	-0.0043	0.0723	0.0714	0.0134	0.057	-0.023	0.0117	0.1342	0.069	0.0192	0.0664	0.0161	-0.0379	0.0364	-0.029	-0.0151	0.0042	-0.0284	0.022	-0.0133	0.0163	0.1139	0.0032	0.03	-0.0243	-0.0542	0.0348	-0.0974	0.2078	0.1499	0.02	0.0222	0.1609	0.1812	0.0791	0.0353	0.1322	0.1086	0.1465	0.148	0.0575	0.1633	0.1365
-0.1024	-0.0192	-0.1667	0.0525	-0.0009	0.0182	-0.004	0.0271	-0.0529	-0.009	-0.0256	-0.1193	0.0055	0.0391	0.0282	-0.0457	-0.0094	-0.0005	-0.0122	0.0138	0.0098	0.003	0.0647	0.0523	0.0027	-0.0139	0.0395	-0.0406	-0.0094	0.0818	0.0107	-0.0322	0.0725	0.0179	0.0613	-0.0224	0.0505	0.0861	0.0176	0.0936	0.0613	0.0673	0.0979	0.0332	0.0753	-0.031	0.0052	-0.0002	0.0183	0.0852
-0.0091	-0.0499	-0.0765	0.0199	0.0778	0.0919	0.0801	0.0197	0.0126	0.061	0.012	-0.0023	-0.0674	0.035	0.1066	0.0092	0.1047	-0.0063	0.0334	-0.0141	-0.0965	0.0715	0.0167	0.0223	0.0022	0.0095	0.065	-0.0368	0.0414	0.0405	0.0043	0.007	-0.0299	0.0102	-0.1338	0.0007	-0.0004	0.1455	0.1179	-0.0506	-0.0163	0.0477	0.1548	0.0069	-0.0897	0.1353	0.0699	0.111	0.0043	0.0231
-0.0521	-0.0566	-0.0237	-0.1376	-0.1488	0.1053	-0.0303	0.0103	0.0544	-0.0324	-0.0135	0.0182	-0.0619	-0.0169	0.0781	0.0304	0.2082	0.0324	0.0011	0.0682	-0.0108	0.0318	0.0198	0.0323	0.0358	0.0806	-0.0949	0.0612	0.0939	-0.0087	0.1429	0.0795	-0.0147	-0.0177	0.1657	0.0915	-0.01	-0.0294	-3.67e-05	0.0334	-0.094	-0.0918	-0.0577	0.1114	0.0777	0.123	0.0525	-0.0049	0.082	0.0591
-0.052	-0.0764	-0.0622	-0.1152	0.0581	5e-06	-0.0501	-0.0035	0.0446	-0.0061	0.0342	0.0488	0.0145	0.1127	-0.0093	0.0602	-0.0209	0.0163	0.0027	0.0041	0.0604	0.0506	0.061	-0.019	-0.0852	0.1036	0.0826	0.0824	0.0117	0.1077	-0.1456	-0.0057	0.0165	0.0195	0.0368	0.075	0.0816	-0.0125	0.076	-0.0608	0.0896	0.1793	0.0427	0.051	0.1945	-0.0921	0.1067	0.0571	0.0392	0.1177
-0.0724	-0.0479	-0.0649	-0.1233	-0.0002	-0.0454	0.018	0.0032	-0.0261	-0.0541	-0.0173	0.0443	0.0328	-0.0292	-0.0615	-0.1048	-0.0891	0.0927	0.0468	-0.0085	0.1439	0.0373	0.0336	0.0496	-0.0308	0.0042	-0.069	0.1018	-0.0031	0.0065	0.1481	0.071	0.1158	0.05	0.0643	-0.0623	0.1021	0.0761	0.0713	0.1033	-0.0111	0.0929	-0.0428	0.0615	0.0327	0.0345	0.0457	0.0804	0.0483	0.0257
-0.13	-0.0984	0.0707	0.0131	-0.2553	-0.0636	-0.0271	0.0562	-0.0306	0.124	0.0049	-0.0853	0.061	-0.0299	-0.0201	-0.0477	0.0074	-0.0011	0.0089	-0.0337	-0.021	-0.0958	-0.0409	-0.0599	0.1355	0.0211	0.0683	-0.0005	0.0436	0.0463	-0.001	0.0159	-0.0022	0.0861	0.1307	0.097	0.1342	-0.0308	0.0029	0.0995	0.0006	-0.0765	-0.0244	0.0902	0.1683	-0.001	-0.0376	0.0544	0.0927	-0.0348
-0.1172	-0.0443	-0.0447	-0.0181	-0.0963	-0.0892	-0.0559	0.017	-0.028	0.1888	0.0469	-0.1245	0.0832	0.0358	-0.0156	0.0084	0.0507	0.0094	0.035	-0.0035	0.0864	0.2419	0.0433	0.2134	0.1396	0.0265	-0.0309	-0.041	-0.0627	-0.0068	-0.0045	-0.0051		-0.0219	0.0412	-0.0761	-0.0276	0.0346	0.1469	0.0472	-0.0566	-0.0467	0.0181	-0.0663	0.0362	0.1291	0.0528	0.0749	0.044	0.0962
0.0011	-0.0273	-0.0726	-0.0265	0.0909	0.0003	-0.0182	-0.0022	0.1509	-0.0702	-0.0014	0.1	0.197	0.042	-0.1443	0.0411	-0.032	0.0585	-0.0117	-0.0564	0.0589	-0.0921	-0.0353	0.064	0.0551	0.0094	-0.0347	-0.0095	-0.0108	0.0482	0.0601	0.27		-0.1412	0.0238	0.0614	-0.004	0.067	0.1892	0.0415	-0.0418	0.1775	0.0746	-0.0111	0.1663	0.1968	0.105	0.0124	0.0982	0.047
-0.1125	0.0195	-0.1101	-0.0277	-0.0767	0.1866	0.0336	-0.0056	0.0182	-0.124	0.0039	0.2235	-0.0145	0.0163	-0.1026	-0.0318	0.1496	-0.0177	0.0412	0.0119	0.0189	0.1329	0.0214	-0.0098	0.0705	0.0534	0.0671	0.1371	0.0894	-0.0175	-0.0325	-0.0307		0.2893	-0.124	0.0336	0.1246	0.0429	0.0572	0.0082	0.0406	0.067	0.0404	0.0978	-0.0099	0.0545	-0.0082	0.1322	0.0637	0.064
-0.0157	-0.0672	-0.0825	0.0934	0.0066	0.0417	-0.0701	0.0117	0.0728	0.1026	0.0336	0.022	0.0037	0.077	-0.0314	-0.0014	-0.0103	-0.0418	-0.0129	0.03	0.1731	0.0691	0.002	0.0846	0.124	-0.0184	0.0464	0.0131	0.1102	-0.0038	0.048	-0.0245		-0.0102	0.1417	0.0761	-0.0489	0.008	0.0066	-0.0482	-0.0739	0.1929	0.0453	-0.0028	0.0581	0.0297	0.0135	0.0935	0.1045	0.0495
-0.1249	-0.0006	-0.0345	0.027	-0.0298	-0.1061	0.1076	-0.0128	0.1116	0.0681	0.0098		-0.044	0.0721	-0.074	-0.0516	0.0201	-0.0038	-0.0068	-0.0424	0.0189	0.2673	-0.1284	-0.0386	0.0738	0.1262	0.0229	0.0978	0.1337	0.0114	-0.04	0.0652		-0.0201	0.194	0.1496	0.0058	0.2365	0.0388	0.0015	0.0907	0.1588	0.0564	0.0405	-0.042	0.0003	0.0449	0.0684	0.042	0.1124
-0.0115	-0.027	-0.0614	0.3247	0.0091	-0.096		0.0281	0.0501	0.0534	0.0062		0.085	0.0393	-0.1142	0.0686	0.0062	-0.0114	-0.0075	0.0964	-0.0923	0.0792	0.0034	0.0295	-0.0392	0.0144	0.019	0.0513	0.0412	0.1004	-0.0475			0.055	-0.0417	-0.0006	0.0863	0.1042	-0.0206	-0.0306	-0.0378	0.1023	0.0234	0.0281	-0.0015	0.0438	0.0057	0.0552	0.1179	0.0788
-0.0448	-0.0636	-0.0036	0.0779	-0.1722	-0.0471		-0.0281	0.0022	0.0861	-0.0062		-0.0132	0.0443	-0.0654	0.0106	0.1293	0.0502	-0.0239		0.015	0.0306	0.0009	0.0195	0.0481	0.0845	0.0375	0.0979		0.0275	0.011			0.1228	0.128	0.0172	0.1039	0.1007	0.0294	0.0477	-0.1127	0.1151	0.064	0.0195	0.1422	0.0705	0.0565	0.0134	0.0675	0.1277
-0.0413	0.0292	-0.0998	-0.0895	-0.1256			0.039	0.0664	-0.0884	-0.035		-0.0159	0.0699	-0.1587	-0.0492	0.0046		-0.0236		-0.0084	0.0971	-0.0153	0.0425	0.1292	0.0458	0.0696	-0.094		0.0531	-0.0101			0.056	0.0102	0.0724	0.0251	-0.0246	0.0638	-0.0213	-0.0035	0.0962	0.0401	-0.0557	0.0651	0.0647	0.0919	0.2064		0.0992
0.0914	-0.063	0.0127	0.0468	-0.0137			-0.0191	0.0577	-0.0255	0.0589		0.0996	0.0665	-0.0375		0.034		0.012		-0.112	0.0608	0.0682	0.017			0.0102	0.04		-0.0291	-0.0471			0.1255	-0.0527	0.1027	-0.0513	0.1408	0.2274	0.0395	-0.0226	0.01	0.0189	-0.0088	0.0687	0.0042	0.0646	0.0218		0.2136
0.2278	-0.1154	-0.0634	0.1253	0.0773			0.0206	0.056	0.078			0.2782	-0.1121	-0.0301		0.1139		0.0067		0.0508	0.0038	0.0153	-0.059			0.0644	0.2		0.1828	-0.0083			0.0556	-0.0507	0.0742	-0.1539	-0.0331	-0.0218	0.1098	0.1793	-0.0167	0.2218	0.0144	-0.0171		0.1701	0.1422		0.1068
0.0533	-0.0675	-0.0145	-0.411	-0.0194			0.043	-0.029	0.0203			-0.114	0.0776	-0.0603		0.1638		-0.0221		-0.0102	0.0537	0.1148	0.0819			0.0153	0.032			0.035			0.0853	-0.0963	0.0621	0.1555	0.0956	0.0505	0.0999	0.0531	-0.0078	-0.0821	0.0907	0.0111		0.0331	0.0898		0.0431
-0.114	-0.0925	0.0036	-0.1513	-0.0026			-0.0385	0.0839	0.0444			-0.1028	0.1298	0.1032		-0.0081		-0.0147		0.0226	0.0452	-0.0352	-0.0451			-0.0843	-0.0123			-0.1204			0.0036	-0.1808	0.1396	0.1058	0.0653	-0.0005	-0.0384	0.0603	0.113	0.0346	0.0748	-0.072		0.0455	-0.0485		0.0775
-0.0421	-0.0853	-0.0148	0.0094	-0.1061			-0.0471	0.0686	0.2937			0.0566	0.0751	-0.0512		0.1122		0.0046		0.0324	0.0835		-0.0176			-0.028	0.0501			0.0558			0.013	0.0416	0.0968	0.1432	0.0268	0.0596	-0.0198	0.1232	0.1041	0.0841	-0.0617	0.0552		-0.0051	0.0955		0.0753
-0.0728	-0.1453	-0.043	0.0087	-0.0606			-0.0036	-0.0401	0.0749			0.0111	0.0538	0.01		0.0054		-0.0037		0.0384	-0.0409		-0.0692			-0.0056	0.1893			0.0459			0.0717	0.0764	0.0286	0.0476	0.1107	0.0579	-0.001	0.0328	0.0131	-0.0004	0.0037	0.0597		0.0489	0.0411		0.0952
-0.1138	-0.048	0.031	-0.1244	-0.0162			-0.0358	-0.0557	-0.0285			0.0488	0.045	-0.0474		0.0838		0.0239		-0.0136	0.0251		0.0131			0.0417	0.081			0.0177			0.0692	-0.0064	0.0442	0.1353	-0.0123	0.1804	0.0051	0.0464	0.033	0.0455	0.0107	0.0283		0.0563	0.0685		-0.0071
-0.09	-0.1061	-0.1003	-0.1024				-0.0078	-0.02	0.0743			0.1302	0.0592	-0.023		-0.1473		0.0194		0.0436	0.1017		0.0321			0.0094	-0.045			0.0611			0.0078	0.0914	0.1353	0.1189	0.0439	0.013	-0.0204	0.0326	0.0182	0.1066	-0.0343	-0.0996		0.02	0.0863		0.0018
-0.1016	-0.0421	-0.0113	-0.0402				-0.0083	-0.0139	-0.0334			0.0437	0.0997	-0.0686		0.1121		0.0024		-0.0239	0.1276		-0.0991			-0.0489	-0.2422			0.0006			0.1053	0.0051	0.0009	0.0914	0.2117	0.1635	0.1497	0.0331	-0.0435	-0.0004	0.0171	0.012		-0.0032	0.0039		0.2169
-0.2237	-0.0372	-0.1731	-0.0618				-0.0081	-0.0403	-0.0995			0.0972	-0.0166	0.1721		0.1451		0.0166		-0.0199	0.0414		0.098			-0.0092	0.0271			-0.0354			0.0652		0.1361	0.1985	0.0233	0.0677	-0.0721	0.0094	0.0412	0.1743	0.0457	-0.0024		0.0464	0.0567		0.0528
-0.1143	-0.0063	-0.0188	-0.0647				-0.0162		0.0798			-0.0004	-0.0571	0.0848		-0.0828		0.017		-0.0139	0.0974		0.0659			-0.0059	-0.0139			0.0959			0.0833		-0.0669	0.0755	0.0873	0.2478	0.1232		0.0436	-0.0126	0.0681	0.1443		0.0392	0.0871		-0.0533
-0.0166	0.0159	-0.0012	0.058				-0.0182		-0.0295			-0.0634	-0.0962	0.1939		-0.0113		0.0007		-0.0334	-0.052		-0.0684			0.2287	0.0771			-0.0965			0.0569		0.1815	0.0596	0.0418	-0.0057	0.0954		0.0184	0.1687	0.0134	0.0145		0.0405	-0.0257		0.0019
-0.0189	-0.0101	0.0014	-0.18						0.0144			0.0378	0.0882	0.0008		0.1578				0.0355	-0.0705					0.0747	-0.0013			-0.0216			-0.0341		0.0807	0.0834	0.044	0.0436			0.0278	0.1217	-0.0408	0.1367		0.0552	0.0624		0.162
-0.0875	0.0357	0.0318	-0.0406						-0.0973			0.0369	0.1108	-0.0138		0.0251				0.0511	0.0323					-0.0761	0.0179			-0.0248			0.0014		-0.0298	0.0491	0.0236	0.0571			0.0855	0.0322	-0.0129	0.0343		0.048	0.0292		0.0995
-0.1577	0.0839	-0.0065	-0.0688						-0.0656			0.1009	-0.1571	-0.0311		0.1597				0.0362	-0.0415					0.0217	0.0842			0.0112			-0.0268		0.014	-0.0042	-0.1114	0.0861			0.0594	0.0534	0.1149	0.0271		0.1586	0.0975		0.1121
-0.0994	-0.0216	-0.0099	-0.0153						-0.0239			0.0139	-0.0167	-0.0833		0.0484				0.0029	0.0095					0.1457	0.0611			0.0356			0.1201		0.1039		0.0473	0.0425			0.1666	-0.0069	0.0078	0.039		0.0222	0.0404		-0.0109
-0.0699	0.0029	-0.0028	-0.0534						-0.0091			-0.0189	-0.0194	-0.0184		0.2316				0.0354	-0.0493					0.1164				0.1123			0.2126		0.0503		0.1387	0.0826			0.1335	0.0396	0.1213	0.1707		0.1971	0.1221
-0.0482	0.1198	-0.0386	-0.1849						-0.0905			-0.1388	-0.1813	-0.0646						0.0339	-0.0398					0.109				0.0767			0.0713		0.0665		-0.0315	0.0386			0.0147	0.0274	0.0305	0.017		0.1009	0.0674
-0.0689	-0.0067	0.0246	-0.0503						-0.064			0.0184		-0.05						0.1087	0.0375					0.0456				0.0738			0.0516		0.0233		-0.0382	0.0537				-0.0569	0.0604	-0.0062		0.0334	0.0831
	0.0382	-0.0023	-0.0624						-0.0491			0.0849		-0.1038						-0.0225	-0.0648					0.0703				0.0302			0.042		-0.0697		-0.0673	0.0222				-0.059	0.062	0.0808		0.0796
	-0.026	-0.0081	-0.0656						0.0147			0.1049		-0.0143						0.0128	0.0854					0.046				-0.0317			0.0349		0.081		0.0779	-0.0231				-0.0411	0.0458	-0.1606		0.0595
		-0.0319	0.1106						-0.1183			0.0986		0.1286						0.0678	0.0954					0.0396				0.1645			0.0023		0.0585		-0.0549	0.033				-0.0353	0.0625	0.2239		0.059
		0.0037	0.0023						-0.0959			0.0143		-0.0001						0.092	-0.1208					0.0546				0.0972			-1.83e-05		0.0573		0.0358	0.0532				0.0969	0.0278	-0.145		0.113
		-0.0444	-0.0763						-0.0027			0.0871		-0.0796						0.0346	0.0296					-0.1375				-8.33e-05			-0.0721		0.043		-0.0464	-0.0409				0.0319	-0.0059	0.0271		0.0187
		-0.0205	0.0303						0.0043			0.0944		0.0434						0.1055	0.0053					0.1175				0.0097			0.1331		-0.0023		0.0538	0.1133				0.125	-0.0017	0.0366		0.0934
		-0.0659	-0.0327						-0.0083			0.0674		-0.0298						-0.0121	-0.1504					0.0047				0.0075			0.0274		0.0155		0.1216	0.0431				-0.0364	-0.0157	0.0548		0.1416
		-0.0777	-0.0549						-0.0099			0.0022		0.0286						0.006	0.094					0.1277				0.072			0.0237		0.0062		0.0955	0.0072				0.0629	0.0541	0.0154		0.1559
		-0.0277	-0.018						0.0161			0.1184		0.0875						0.066	0.059					0.058				0.0975			0.0507		0.0423		-0.2175	0.0371				0.1258	-0.0011	0.0805		0.1141
		-0.0558	-0.0256						0.0007			-0.0579		-0.0043						0.0072	-0.0361					0.0857				-0.0179			0.1393		0.0781		0.0581					0.1221	0.0586	0.0269		0.1171
		-0.0396	-0.0141						0.0121			-0.0541		-0.0326						0.0412	-0.0326					0.0031				0.0478			0.0254		0.0096		0.125					0.1545	0.0736	0.1439		0.0583
		-0.0263	-0.1729						0.0003			-0.0578		-0.1299						-0.0484	0.0235					-0.0207				0.0128			0.1592		0.0553		0.0585					0.0515	0.1127	0.1187		0.2067
		0.012							0.0087			-0.0149		-0.0494						-0.0502	0.0863					0.105				-0.0198			0.0643				0.0307					0.0596	0.0368	0.0615		0.0862
		-0.0005							0.0029			0.0355		-0.0146						-0.0045	0.0796					0.0011							0.0171				0.0384					0.0646	0.0886			0.0471
		-0.0123							0.0083			0.0567		0.0018							0.0676												-0.0231				0.054					0.1024	-0.0367			0.1703
		-0.0757										-0.0017		-0.003							-0.0481												0.1318				-0.0177					-0.0102				-0.0068
		-0.1633										0.0175		0.0297							0.0527												0.0208				-0.0469					-0.0759				-0.0101
		-0.0823										-0.0177									-0.1077												0.0328				-0.0033					-0.15				-0.0044
		-0.0456										0.0199									0.0556												0.0361									-0.1536				0.026
		-0.0888										0.0943									0.0671												0.0846									-0.0016				0.3316
		-0.1003										0.082									0.0103												-0.0336									0.07				0.0231
		-0.0775										0.0094									0.0394												-0.0025									0.0855				0.1272
		-0.0817										0.0349									0.07												0.0553									-0.0084				0.0967
		-0.0322										0.0836									-0.0499												0.0538									0.0074				0.1312
		-0.1226										0.0331									-0.0105												0.1782									-0.0191				0.139
		-0.0437										-0.0082									-0.0636												0.1084									0.2013				0.1127
		-0.1633										-0.0279									0.1669												0.0004									0.1269				0.0428
		-0.0891																			-0.0002												0.0901									0.1354				0.1601
		-0.188																			0.1152												0.0815									-0.0165				0.1028
		-0.0118																			0.0464												0.0788									-0.0775				0.0328
		-0.0708																			0.1053												0.1788									-0.0542				-0.0024
		-0.199																			0.0492												0.0812									-0.0064				0.1744
		-0.1096																			0.139												-0.011									-0.0104				0.034
		-0.1818																			0.0447												0.0287									-0.0012				0.0587
		-0.0857																			0.018												0.089									-0.0083				0.021
		-0.0182																			0.1291												0.0167									-0.0011				0.134
		-0.0555																			0.1376												0.0515									0.0341				0.0345
		0.0025																			-0.0429												-0.0538													0.049
		-0.1013																			-0.0051												0.0427													0.1159
		-0.0545																			0.0196												0.0172													0.0543
		-0.0085																			0.0938												0.0811
		-0.0063																			0.1179												0.0738
		-0.0989																			-0.0144
		-0.2121																			-0.1226
		-0.0263																			0.0594
		-0.2304																			0.0221
		-0.0846																			-0.0049
		-0.0541																			0.0108
		-0.1681																			0.0473
		-0.195																			0.037
		0.1077																			0.1108
		-0.0168																			0.0723
		-0.0079																			0.2049
		-0.0309																			-0.0024
		0.085																			0.1897
		0.0295																			0.0532
		0.0281																			-0.0022
		-0.0546																			-0.0829
		-0.1134																			-0.0444
		-0.0382																			-0.0044
		-0.095																			-0.0125
		0.0628																			-0.1061
		0.0141																			-0.0052
		0.0538																			-0.0182
		0.0494																			0.0581
		-0.0626																			-0.07
		-0.0188																			0.0247
		-0.0182																			0.0539
		-0.1388																			0.0772
		-0.0387																			0.1216
		-0.0936																			0.0181
		-0.0878																			0.0299
		-0.0336																			-0.0186
		-0.0091																			-0.086
		-0.0433																			0.0774
		0.0136																			-0.0556
		-0.1141																			0.1511
		-0.0884																			-0.0468
		-0.0753																			0.0632
		-0.0688																			0.1194
		0.0048																			0.0034
		-0.0847																			-0.0557
																					0.1638
																					0.0534
																					-0.0227
																					-0.0025
																					0.0527
																					0.106
																					0.0288
																					0.0355
																					-0.0795
																					0.0223
																					-0.1471
																					0.0838
																					0.0447
																					-0.0447
																					-0.0077
[truncated: 14 more columns]
