# Supplementary material for: Neural circuit mechanisms for transforming learned olfactory valences into wind-oriented movement
Source: eLife. 2023 Sep 18;12:e85756. doi: 10.7554/eLife.85756 (PMC10588983; doi:10.7554/eLife.85756)
Supplement: Figure 2—source data 2. [file elife-85756-fig2-data2.xlsx]

## Sheet: Sheet1
DataType	T1	T2	SS01126	MB011C	SS32218	SS01227	SS1126	SS01344	SS40549	SS49755	MB002B	MB029B	SS48900	SS00561	SS00550	Gr64f-GAL4	MB018B	SS00504	MB310C	SS32230	SS39541	G0239	SS32195	MB043C	MB112C	SS00581	SS32244	SS88953	SS56699	Empty-split	MB434B	SS00543	SS32228	MB315C	SS33909	MB027B	MB441B	MB433B	MB109B	MB213B	SS00623	MB555B	SS45222	MB022B	SS88997	MB036B	MB082C	SS32189	MB025B
DeltaDistanceFromCenter	-2	0	-0.2804	0.1279	0.5779	0.236	-1.1846	1.231	2.2628	0.2958	2.1747	-0.7219	0.7508	-0.1643	1.5917	-0.8429	1.0048	-1.0314	0.9928	0.4434	-0.5961	0.5472	0.7124	1.6259	0.6397	-1.534	-2.2724	-0.6609	-0.2053	0.8376	1.8992	-0.0187	-0.1538	-0.1649	1.2499	0.3648	0.8273	0.6889	-0.5174	2.559	0.1162	-0.1122	-1.3826	-1.2245	0.5005	-0.7783	0.1553	-0.5331	-1.0362
DeltaDistanceFromCenter	0	2	-1.6812	-0.9319	-1.2678	-0.9185	-1.3817	-0.3791	-1.2158	-1.3959	-1.2146	-0.5184	-0.8428	-2.2792	-0.3396	-0.4624	-0.6222	0.0521	-0.2064	-0.4671	-0.1657	-0.4261	-2.0526	-0.8951	0.3721	-0.8012	-0.3384	-0.0868	0.4197	-0.0649	-0.0148	-0.4576	-0.2716	-1.1894	-0.3198	0.2644	-0.1248	0.1098	0.6021	0.2854	-0.262	0.5201	0.3291	-0.1222	-0.3873	0.2519	-0.3728	0.2112	0.7762
DeltaDistanceFromCenter	2	4	-2.1768	-1.8007	-1.5126	-1.6727	-1.1549	-1.1743	-1.3939	-1.1384	-1.1199	-0.7422	-0.9698	-1.1322	-0.6791	-0.693	-0.5897	-0.5979	-0.5239	-0.5644	-0.4422	-0.258	-0.7832	-0.6492	0.1782	-0.2107	-0.5756	-0.3987	0.1075	-0.1853	0.1156	-0.4307	-0.1523	-0.7424	-0.3121	0.0283	-0.0371	0.0143	0.1047	0.1141	0.0532	0.0626	0.3478	-0.1855	-0.1621	-0.1436	0.2934	0.4929	1.0926
DeltaDistanceFromCenter	4	6	-2.8706	-2.3077	-1.9741	-1.6516	-1.3815	-1.2934	-1.217	-1.1317	-1.1242	-0.8699	-0.8495	-0.7675	-0.708	-0.6572	-0.6397	-0.6092	-0.5227	-0.4408	-0.4005	-0.372	-0.3617	-0.3558	-0.3146	-0.2955	-0.257	-0.2205	-0.1521	-0.145	-0.1344	-0.1316	-0.1279	-0.11	-0.0548	-0.0485	-0.048	-0.0358	-0.0263	-0.0003	0.0483	0.0671	0.0731	0.1043	0.1051	0.1589	0.1712	0.3017	0.3087
DeltaDistanceFromCenter	6	8	-3.1587	-2.5223	-1.7224	-1.5187	-1.5119	-0.9245	-1.3183	-1.2247	-1.1568	-1.0192	-0.6806	-0.929	-0.5732	-0.6041	-0.8242	-0.5246	-0.3143	-0.3019	-0.0988	-0.3372	-0.4553	-0.229	-0.5266	-0.2497	-0.0122	-0.0685	-0.6284	-0.2155	-0.121	-0.1459	-0.1917	0.0921	-0.1213	0.1209	0.0667	0.0857	0.4763	-0.0524	-0.0451	0.0385	-0.1751	0.2523	0.2892	0.3052	-0.1213	-0.041	0.3401
DeltaDistanceFromCenter	8	10	-2.9466	-2.4921	-1.5126	-1.4032	-1.7081	-0.8201	-1.9022	-1.0593	-1.1266	-0.726	-0.4126	-0.9766	-0.3532	-0.531	-0.5945	-0.4453	-0.3234	-0.2271	-0.3247	-0.4735	-0.3871	-0.0613	-1.0046	-0.359	0.14	0.2095	-0.9307	-0.0721	-0.0199	-0.1694	-0.1003	0.0206	-0.2799	0.0872	0.1372	-0.0527	0.9384	0.0208	0.4159	0.0626	-0.5129	0.2923	0.2384	0.4907	-0.2961	-0.1449	0.3219
DeltaDistanceFromCenter	10	12	-2.2854	-2.2834	-1.2468	-0.9136	-1.4057	-0.5584	-2.4245	-1.2011	-0.3806	-0.1564	-1.4814	-0.9344	-0.119	-0.2951	-0.3416	-1.146	-0.5352	-0.0473	-0.3949	-0.6716	-0.2308	-0.1774	-1.426	-0.3873	0.459	0.2976	-1.0267	0.048	-0.0083	-0.2975	0.1171	0.0693	-0.1881	0.0106	-0.0273	-0.3423	0.4377	-0.1369	0.7081	-0.1728	-0.9175	0.4627	-0.0396	0.3778	-0.3669	-0.2519	0.2784
DeltaDistanceFromCenter	12	14	-1.1052	-0.8448	-1.1648	-0.1825	-0.9756	-0.5212	-3.2355	-1.6971	0.7815	0.0971	-1.2303	-0.7855	-0.2918	-0.5222	-0.6925	-1.4791	-0.7002	0.033	-0.1484	-0.8595	-0.4569	-0.1998	-2.0537	0.4504	0.6698	0.3708	-1.196	0.5011	0.6414	-0.2391	0.1065	-0.1293	-0.0809	0.1114	0.0842	-0.0788	-0.5561	-0.1049	1.0531	-0.3969	-1.1671	0.3297	-0.1077	0.2807	-0.9248	-0.1894	0.6802
DeltaDistanceFromCenter	14	16	-0.3427	-0.2164	-1.1601	0.1738	-1.2038	-0.1099	-3.246	-1.7766	1.3404	0.1541	-1.0378	-0.6026	0.1467	-0.69	-0.9098	-1.5762	-0.8037	-0.0303	-0.0194	-0.6519	-0.6202	-0.2016	-2.3539	0.8424	0.6709	0.3394	-1.5649	1.024	1.4138	0.0469	0.1623	-0.4622	0.0154	0.4919	-0.0695	0.1999	-1.2597	0.0936	1.4935	-0.0641	-0.8583	0.1947	-0.1353	0.2821	-1.4762	-0.1715	0.6814
DeltaDistanceFromCenter	16	18	0.1962	-0.1182	-1.1507	0.5048	-1.2043	0.0346	-2.8931	-1.6236	1.7856	0.4058	-0.7554	-0.3635	0.4281	-0.8605	-0.2768	-2.1824	-0.7749	-0.2784	0.2654	-0.5503	-0.4275	-0.2454	-2.5494	0.6376	0.5029	0.2689	-1.6615	1.1054	1.2462	0.1784	0.4917	-0.7287	-0.1953	0.7669	-0.1875	0.4176	-1.0376	0.2564	1.4884	0.1065	-0.5803	0.3579	-0.3243	0.147	-1.5817	-0.1516	0.8733
Cos(Upwind)	-2	0	-0.2292	0.8114	-0.1548	-0.4544	-0.819	-3.2209	2.4876	0.7372	-0.733	-0.0034	1.9085	0.2175	-1.8234	1.2773	-0.2069	1.0002	-0.6062	0.3592	-0.3449	-0.4028	-2.1991	0.2796	0.5809	0.7511	1.0765	0.8097	-0.4589	-0.53	-0.6509	-0.155	0.8013	-0.5152	-0.486	-0.1643	-0.6088	-0.501	2.3078	-0.6482	-0.4665	0.9251	0.5315	0.5341	0.6212	0.7681	-0.3372	1.9028	0.9997
Cos(Upwind)	0	2	-1.9421	-0.9351	-0.5342	-1.2128	-1.106	-1.3187	-0.3912	-0.4643	-1.1174	-0.8269	0.7751	-1.4109	-2.4941	-0.5795	-2.0541	0.0636	-0.0634	0.0189	-1.6139	-0.6951	-0.5642	-1.0752	0.6747	0.5618	0.0206	0.3954	-0.0774	-0.0958	-0.4055	-0.7463	0.0583	-1.2404	-0.2304	-0.3077	-0.3338	-0.3224	1.2183	-0.3099	-0.417	0.3068	1.6751	-0.3762	0.311	-0.2974	0.6505	0.8574	0.5066
Cos(Upwind)	2	4	-2.0471	-1.7547	-0.5717	-1.8467	-0.9351	-1.3961	-0.8131	-0.3554	-0.538	-0.7346	0.9616	-0.0816	-2.5444	-0.3728	-1.7965	0.3487	-0.1214	-0.5284	-2.0816	-0.5031	-0.0402	-0.8102	0.4976	0.8134	-0.6315	0.5433	-0.3694	0.0732	-0.2876	-0.6668	-0.5343	0.0864	0.0443	-0.0148	-0.1901	-0.8303	1.1319	-0.5216	-0.5052	-0.3239	0.8593	-0.0979	0.4262	-0.2304	0.5939	1.0939	-0.808
Cos(Upwind)	4	6	-2.2132	-1.8875	-0.1407	-0.9875	-1.2022	-0.3072	0.4611	-0.1887	-0.7803	-0.4387	1.8211	-0.3111	-2.0966	0.5646	-2.3881	1.2457	0.246	-0.2153	-1.5703	-0.7095	-0.1075	-0.3094	-0.3119	0.3163	-0.1464	1.3028	-1.2317	0.1247	-0.9089	-0.2058	-0.7318	0.2762	0.3002	0.0995	-0.4026	-0.5283	1.8706	-0.5446	-0.6606	-0.7079	-0.1383	0.1619	1.0254	-0.5418	0.278	0.7037	-1.2752
Cos(Upwind)	6	8	-1.3513	-1.6416	0.6794	-1.1698	-0.3469	-0.4918	0.5693	0.2894	-0.7446	-0.019	2.2702	-0.246	-1.8048	1.1698	-2.2587	1.826	0.1431	-0.5543	-1.8054	-0.8866	-0.3163	0.281	-0.2371	0.4505	-0.3765	1.433	-2.0351	-0.1693	0.0961	-0.6951	-0.6071	-0.4912	-0.5567	-0.2011	-0.6263	-0.1404	1.4233	-0.4441	-0.5721	-0.7332	-0.5365	-0.195	1.2055	-0.7191	-0.2762	1.1655	-0.6142
Cos(Upwind)	8	10	-0.6814	-1.0716	0.5372	-0.7037	-0.3059	-0.8086	-0.318	0.9359	-0.6018	1.2498	2.4552	0.2493	-1.5512	1.4774	-1.7409	1.9693	-0.2315	-0.5192	-2.3286	-0.9371	-0.253	0.275	-0.5907	-0.0831	-0.4435	1.2464	-1.8102	-0.2851	-0.75	-0.7056	-0.4653	-0.5762	-0.7072	-0.4973	-0.2128	-0.3253	1.696	-0.7724	-0.1773	-1.0469	-0.7145	-0.078	0.7581	-0.9434	-0.0518	1.1759	0.1677
Cos(Upwind)	10	12	1.1796	2.7629	0.6324	0.6985	0.6783	-1.378	-0.4794	0.0065	1.0341	1.6133	1.8507	1.1087	-2.7774	0.4113	-0.4883	0.0937	-0.3466	0.0305	-0.3749	-0.6647	-0.8489	0.2434	-1.2688	1.4555	-0.1939	0.9863	-1.1482	0.1284	0.7546	0.0209	-0.3904	-0.8249	-0.5131	-0.1147	-0.6376	-1.0201	0.2309	-0.427	0.0032	-2.0744	-0.9019	0.1599	1.0203	-0.4448	-0.2592	1.6434	0.2981
Cos(Upwind)	12	14	1.6514	4.3007	0.5566	1.289	-0.1702	-0.2577	0.7989	0.0042	1.5309	1.647	0.9596	0.7666	-2.1951	-0.1745	-0.6255	1.1029	-0.7578	-0.0988	-0.1596	-0.1636	-0.957	0.1015	-1.5659	0.9909	-0.476	0.4445	-0.6141	0.5152	1.2768	1.0858	0.046	-0.6049	-0.4737	0.1711	-0.7664	-0.0757	0.2541	-0.2803	0.2771	-0.4152	0.2132	-0.1699	0.7596	-0.4105	-0.6782	0.9052	0.8965
Cos(Upwind)	14	16	1.3598	3.1721	0.572	0.8981	-1.057	-0.4615	2.0459	0.8746	1.4402	0.9559	1.0631	0.7046	-1.7861	-0.0173	-0.4543	0.5157	0.0179	-0.0717	0.1579	0.3034	-1.3539	0.449	-1.2247	0.4871	-0.7488	0.1315	-0.6712	0.1595	0.5894	0.9933	1.0393	-0.3503	-1.1127	0.109	-0.985	0.2984	1.4498	-0.273	0.1564	0.1632	0.3804	-0.3993	0.8821	-0.089	-0.5617	0.9406	1.2814
Cos(Upwind)	16	18	0.6962	2.3092	0.3346	1.4242	-0.5184	-1.3127	2.2626	1.2096	1.2471	1.1703	1.2291	0.5125	-2.6194	-0.1398	0.4382	-0.4447	0.7034	0.2333	0.8478	0.1704	-1.2895	0.1276	-0.6963	0.2484	-0.8538	-0.0542	-0.4845	0.0409	0.1886	0.7952	0.8424	-0.4802	-0.9823	-0.0708	-0.8109	-0.3429	1.8261	-0.8444	-0.8095	0.1602	0.1672	-0.3168	1.0766	-0.1108	0.4661	1.4028	1.0201
DeltaAnglefroPreviousFrame	-2	0	0.157	-1.6855	-0.3749	-0.3284	0.0778	-1.2293	-0.8847	-0.018	-0.3208	-0.3454	0.0209	0.4445	-0.4489	-0.8408	-0.3241	-0.5065	0.6099	0.8604	-0.5076	0.7446	-0.6391	-0.5018	2.2213	-0.3951	-0.6033	-2.3645	-1.4592	0.4611	1.7158	-1.3012	-0.0748	-0.5864	-0.3975	1.9113	1.2482	1.9054	0.0821	1.9295	-0.1059	0.0725	0.9612	-0.2533	-2.5078	-0.1045	2.4004	-0.6054	0.8847
DeltaAnglefroPreviousFrame	0	2	0.9923	0.0852	-0.1654	0.5151	1.3574	-0.1131	-0.0741	-0.7578	-0.3513	-0.8275	-2.7097	0.3021	-2.6951	-3.1224	-0.9196	-2.4383	0.5752	-0.3299	-1.0148	-0.1101	1.3018	-0.9656	0.4247	0.8505	-0.2315	-0.1444	-0.6327	0.1848	1.3225	-0.0418	0.0773	-0.3343	-0.1032	0.788	0.202	0.6084	-0.3342	0.1435	0.5185	-0.0567	0.8534	-0.9324	-1.1527	-0.0923	1.3441	-0.5861	0.0354
DeltaAnglefroPreviousFrame	2	4	0.3002	-0.4708	0.0414	-0.2877	0.6843	-0.1742	-0.4749	1.542	-0.182	-0.596	-2.4114	0.0582	-2.588	-2.3236	-0.8535	-3.2427	0.1955	-0.699	-0.8825	0.3212	2.6162	-0.3077	0.3107	-0.0647	-0.0978	-0.6553	-0.5927	0.1262	0.7754	-0.4785	0.0451	-0.0513	-0.1779	0.3063	-0.0824	0.4071	-0.7083	-0.2672	0.364	-0.3766	1.0628	-0.5221	-1.4615	0.1565	1.057	-0.4847	0.6385
DeltaAnglefroPreviousFrame	4	6	0.0929	-0.6854	0.1646	-0.3473	0.7489	0.0344	-0.6648	2.1467	-0.3018	-0.4293	-2.3768	0.0356	-2.7325	-1.6275	-0.9447	-3.0828	-0.0196	-0.9204	-0.8325	0.2444	2.5632	-0.2439	0.1564	-0.2725	-0.1828	-0.6452	-0.6327	0.0439	0.7265	-0.4242	-0.0873	-0.1416	-0.2103	0.3409	-0.1826	0.2267	-0.6625	-0.3723	0.3946	-0.2528	0.9769	-0.435	-1.6338	0.3128	1.0254	-0.4279	0.5031
DeltaAnglefroPreviousFrame	6	8	0.1972	-0.5887	0.2611	-0.3838	0.7402	0.2598	-0.6312	2.2741	-0.288	-0.4138	-2.388	-0.0218	-2.833	-1.3042	-0.8306	-3.0577	-0.2477	-0.9278	-0.8447	0.2221	2.5755	-0.2813	0.1716	-0.3153	-0.1085	-0.5907	-0.733	0.1077	0.9461	-0.3982	-0.1558	-0.1876	-0.3683	0.4952	-0.1148	0.2689	-0.6266	-0.4611	0.3681	-0.1082	0.7198	-0.4558	-1.7315	0.4094	0.5579	-0.4791	0.4909
DeltaAnglefroPreviousFrame	8	10	0.1617	-0.6135	0.298	-0.329	0.906	0.3046	-0.8532	2.258	-0.0516	-0.4817	-2.3506	-0.0369	-2.9162	-1.06	-0.8119	-2.8593	-0.3072	-0.8881	-0.8678	0.3235	2.4008	-0.2553	0.0776	-0.3245	-0.0962	-0.6557	-0.8696	0.0733	0.7202	-0.4154	-0.0066	-0.0654	-0.3443	0.4998	-0.0571	0.6248	-0.842	-0.2474	0.5079	-0.1443	0.4393	-0.5617	-1.7837	0.3902	0.4813	-0.3522	0.6326
DeltaAnglefroPreviousFrame	10	12	-0.1977	0.0681	-0.1795	-0.4416	0.4423	-0.7521	-0.9458	4.3094	-0.2281	-0.4127	-0.4343	1.3387	-4.1207	-0.4606	0.1727	-0.3006	-0.6317	-0.7892	-0.4571	0.0091	1.337	-0.5225	-0.1976	0.5892	-0.8044	-1.2014	-0.7357	0.4618	0.4977	-0.635	-0.4275	-0.9109	-0.6604	0.5701	0.4156	1.0382	1.3996	0.4556	0.6882	-0.5335	0.8164	-0.3002	-1.0049	0.3453	0.1938	-0.4959	0.3917
DeltaAnglefroPreviousFrame	12	14	0.4961	-0.2217	0.0541	0.0837	0.8762	-0.0891	-1.1982	2.543	0.2195	0.0661	-0.85	1.791	-2.4839	0.0809	-0.2887	0.859	-0.4165	-0.3435	-0.3292	0.4123	1.7616	-0.8902	0.3178	-0.0464	-0.9401	-2.0379	-1.572	0.9176	1.097	-0.8453	-0.1757	-0.6214	-0.8668	0.9896	0.5826	1.2026	0.3196	0.8289	0.5551	-0.3005	1.0777	-0.5674	-2.6908	-0.0956	0.375	-0.7275	1.5094
DeltaAnglefroPreviousFrame	14	16	0.63	-0.3391	-0.0539	0.3463	0.6525	-0.286	-1.1371	2.0334	0.4025	-0.0422	-0.5115	1.7099	-2.0301	-0.7235	-0.0465	0.4536	-0.3936	-0.2668	-0.1836	0.4706	1.4877	-0.9465	0.7385	0.0608	-0.9407	-2.3354	-1.7952	0.9502	1.8533	-0.8604	0.1927	-0.7118	-1.0007	1.5204	0.7253	0.9859	0.3151	0.9583	0.5339	-0.0308	1.2733	-0.4556	-2.699	-0.2548	0.3986	-0.5962	1.4574
DeltaAnglefroPreviousFrame	16	18	0.7381	-0.5736	0.0101	0.3727	0.5067	-0.3797	-0.7919	2.1111	0.2271	0.1825	-0.2405	1.4012	-1.9698	-1.0746	-0.2977	-0.1468	-0.0961	-0.1835	0.1557	0.6106	1.426	-0.7557	0.7665	-0.1316	-0.6458	-2.5417	-1.5311	0.8386	2.0022	-0.8708	0.1409	-0.5634	-0.7791	1.814	0.8859	1.3691	0.7296	0.9536	0.3724	0.0319	1.1455	-0.3377	-2.9023	-0.3964	0.5563	-0.7414	1.156
WalkingDistanceFromPreviousFrame	-2	0	-0.1223	-2.0691	-0.3864	-0.9434	-0.019	-1.7485	2.3661	1.2353	-0.0781	-0.5364	0.9075	-0.2092	-0.1344	-2.2202	0.4396	1.8019	-1.1141	0.4017	-0.2077	0.5819	-1.39	-1.0136	0.5815	-0.2884	-0.7142	-2.2729	-1.2786	-0.039	1.4433	-1.4647	-0.3924	-1.1001	-0.4934	1.6519	0.0933	0.157	1.8811	1.1396	0.3808	0.2941	0.5957	-0.064	-1.9835	0.4596	1.1309	0.671	1.3173
WalkingDistanceFromPreviousFrame	0	2	0.6043	-0.743	1.037	-0.646	1.2845	-0.5929	0.9962	1.2474	-0.1445	-0.6123	-2.3891	1.7873	-2.3877	-2.7462	-0.9109	-2.4283	-0.4344	-0.1512	-0.8789	-0.0858	2.4438	-1.0063	0.4208	0.4718	-0.0419	-0.9896	-0.0407	0.2501	0.6249	-0.8678	-0.1531	-0.4982	0.6833	0.0111	-0.1044	-0.2006	1.2263	-0.3196	1.4316	0.2459	0.6091	-0.7938	-1.3659	-0.3343	0.5631	1.2629	0.5748
WalkingDistanceFromPreviousFrame	2	4	0.8531	-0.5515	1.4045	-0.633	1.1608	0.22	0.6864	2.389	0.2696	-0.2192	-2.4774	1.4336	-2.4712	-2.306	-0.5488	-2.7075	-0.3391	-0.9279	-0.6227	0.0715	2.5975	-0.6689	0.3535	0.3148	-0.0104	-0.8707	-0.2252	0.2527	0.6608	-0.3571	-0.1248	-0.2245	0.5303	-0.1817	-0.2037	-0.023	0.6855	-0.8084	0.5185	-0.4592	0.3148	-1	-1.3618	0.3907	0.3892	0.7203	0.7239
WalkingDistanceFromPreviousFrame	4	6	0.8726	-0.4635	1.7344	-0.5563	1.3601	0.4683	0.6349	2.9086	0.2728	-0.1827	-2.3989	0.7617	-2.5026	-1.9835	-0.6967	-2.6369	-0.509	-1.1314	-0.4093	0.2468	2.1569	-0.4729	0.3645	-0.1542	-0.1269	-0.7456	-0.2472	0.2761	0.7892	-0.1569	-0.1942	-0.344	0.2209	0.024	-0.4162	-0.1123	0.4112	-0.8767	0.2984	-0.1989	0.3143	-0.8845	-1.6402	0.262	0.4216	0.4422	0.928
WalkingDistanceFromPreviousFrame	6	8	0.8524	-0.4484	1.3887	-0.5621	1.5432	0.4681	0.721	3.183	0.2316	-0.2299	-2.2775	0.6136	-2.4704	-1.8318	-0.5715	-2.5858	-0.6937	-1.179	-0.3819	0.1828	1.7337	-0.4636	0.2736	-0.3658	-0.1807	-0.8336	-0.3276	0.2361	0.772	-0.1067	-0.2079	-0.4782	0.0878	0.146	-0.3812	-0.0945	0.4924	-0.6692	0.242	-0.0789	0.2776	-0.8761	-1.7075	0.3069	0.247	0.4769	0.7608
WalkingDistanceFromPreviousFrame	8	10	0.8538	-0.4943	1.1351	-0.5456	1.4435	0.4699	0.7135	3.383	0.2945	-0.1889	-2.0919	0.7433	-2.4841	-1.7127	-0.6134	-2.38	-0.7136	-1.108	-0.34	0.1593	1.5296	-0.6277	0.3863	-0.2561	-0.1786	-0.9777	-0.3957	0.2057	0.6075	-0.1785	-0.1085	-0.5132	0.0584	0.1437	-0.4833	0.1138	0.2002	-0.6236	0.2488	-0.0759	0.1171	-0.9338	-1.6813	0.2654	0.1638	0.4146	1.1525
WalkingDistanceFromPreviousFrame	10	12	0.415	-0.0511	0.7511	-0.59	0.7749	0.3106	1.5225	3.4988	0.1812	-0.2288	-0.9827	0.6028	-3.3326	-2.1461	0.345	-0.718	-0.9847	-0.7254	0.1281	0.7288	0.7019	-0.6898	-0.5438	0.8251	-0.6408	-1.678	-0.5064	0.5895	0.5628	0.1923	-0.3563	-0.8312	-0.5844	1.1909	0.0779	0.2331	1.4223	0.1926	0.3982	-0.1215	0.4775	-0.5181	-1.4685	0.25	-0.1061	0.2165	1.3198
WalkingDistanceFromPreviousFrame	12	14	0.183	-0.4095	0.0419	-0.5026	0.3712	0.0318	2.0246	2.8824	0.3798	0.0153	-0.6966	0.4042	-1.9261	-2.1721	0.8853	0.6682	-0.988	-0.3979	0.2233	1.2882	0.158	-0.6314	-0.6253	0.1987	-0.7619	-1.9748	-0.6109	0.6206	0.8175	-0.1848	-0.2432	-0.7155	-0.7183	1.3915	0.0584	-0.1659	2.0679	0.2408	0.0683	0.1698	0.7828	-0.322	-2.0081	0.1333	0.0945	-0.0879	1.4934
WalkingDistanceFromPreviousFrame	14	16	0.0174	-0.8531	-0.1084	-0.4252	0.2226	-0.3868	1.8597	2.4749	0.1522	-0.2913	-0.1813	0.2891	-1.973	-2.3453	1.1847	1.4298	-0.7936	-0.1757	0.4834	1.032	0.0383	-0.7687	-0.3114	-0.1367	-0.9181	-2.3229	-0.7661	0.3753	0.7829	-0.6687	-0.1637	-0.8569	-0.7702	1.4851	0.1569	-0.0917	2.1445	0.2833	-0.0623	0.4254	0.8607	-0.1701	-2.284	0.2545	0.3501	0.1707	1.4956
WalkingDistanceFromPreviousFrame	16	18	-0.0388	-1.1108	0.0152	-0.5578	0.3746	-0.7436	1.4088	2.8358	0.1429	-0.0633	0.119	0.2236	-2.0258	-2.3542	1.5584	1.7167	-0.7134	0.034	0.7542	1.0748	-0.0505	-1.0554	-0.1244	-0.3703	-0.8228	-2.3149	-0.5763	0.3683	0.6227	-0.7771	-0.3482	-0.9142	-0.5355	1.3035	0.0332	-0.0875	1.7493	0.2098	-0.0969	0.3492	0.7142	-0.2072	-2.402	0.1901	0.2171	0.3824	1.5203
revisit-10mmOut3mmIn-10s	-2	0	1.2712	-0.1184	0.3255	-0.1709	2.3617	-0.2508	1.1983	2.3919	-0.1027	-0.7219	-2.2208	0.1186	-2.2511	-2.1843	-1.2307	-2.1742	-0.0635	-0.9988	-0.9199	0.6912	1.5157	-0.0253	0.6772	-0.1733	-0.4154	-1.3273	-0.8043	0.101	1.6303	-0.0872	-0.2569	-0.3694	-0.1655	0.3066	-0.3396	0.0832	0.1886	-0.5767	0.427	-0.0178	0.4068	-0.6831	-1.4	-0.1763	1.4787	-0.13	0.8089
revisit-10mmOut3mmIn-10s	0	2	0.634	-0.2304	0.0329	-0.1358	1.9624	-0.031	0.1218	3.9832	-0.2316	-0.6137	-1.7655	-0.0103	-1.7495	-1.7067	-0.8647	-1.8388	-0.6378	-0.816	-1.0313	0.4737	1.8098	-0.4136	0.2071	-0.5494	-0.3373	-1.2582	-0.646	0.0401	0.6771	-0.0629	-0.081	-0.2404	-0.2275	-0.0958	-0.4408	-0.5704	-0.0934	-0.3905	-0.0734	-0.3094	0.3807	-0.7515	-1.437	0.2647	0.8815	-0.0475	0.8208
revisit-10mmOut3mmIn-10s	2	4	0.2942	-0.3358	-0.1452	-0.1687	0.9644	-0.2264	0.3821	4.0568	-0.3941	-0.5536	-1.5394	0.0111	-1.5361	-1.4691	-0.6694	-1.5717	-0.8112	-0.8559	-1.0296	0.46	1.5539	-0.3658	-0.0776	-0.5502	-0.4094	-1.328	-0.683	-0.0006	0.2244	0.0673	-0.1264	-0.2524	-0.3001	0.1727	-0.3554	-0.6198	-0.5366	-0.4408	-0.4012	-0.3334	0.2912	-0.7555	-1.322	0.4681	0.9238	-0.2419	0.9719
revisit-10mmOut3mmIn-10s	4	6	0.1182	-0.5608	-0.3313	-0.2028	0.625	-0.1784	0.3598	4.0198	-0.696	-0.3612	-1.2574	0.103	-1.5139	-1.5226	-0.5773	-1.1155	-0.5561	-0.6291	-0.7735	0.5572	1.2919	0.003	-0.4242	0.0172	-0.6562	-1.2139	-0.8344	-0.0108	0.5203	0.0956	-0.3062	-0.3674	-0.3483	0.3836	-0.3779	-0.8367	-0.0764	-0.4145	-0.4456	-0.3447	0.0285	-0.6431	-1.2461	-0.0112	0.8496	-0.5153	0.3874
revisit-10mmOut3mmIn-10s	6	8	-0.2195	-0.8928	-0.4057	-0.4069	-0.021	-0.5105	0.0822	3.7904	-0.7668	-0.3675	-0.6315	0.2048	-1.4151	-1.591	-0.5791	-0.6727	-0.5942	-0.5817	-0.5921	0.6603	0.7739	-0.3787	-0.0023	0.2364	-0.7887	-1.296	-0.9425	0.0261	0.5031	-0.4576	-0.2367	-0.2262	-0.5381	0.3704	-0.3265	-0.7537	0.4776	-0.3752	-0.4676	-0.6072	0.0017	-0.3516	-1.3549	-0.2468	0.8047	-0.5336	-0.0007
revisit-10mmOut3mmIn-10s	8	10	-0.7439	-1.1426	-0.2278	-0.3071	-0.6458	-0.6468	0.1467	3.7707	-0.9595	-0.6015	0.0171	0.3373	-1.1948	-1.5921	-0.3178	-0.2868	-0.7152	-0.4325	-0.4206	0.4799	0.6042	-0.6307	0.2767	0.0854	-0.7633	-1.5572	-1.1086	0.1447	0.363	-0.7357	-0.507	-0.1599	-0.2929	0.2941	-0.3214	-0.2131	1.3217	-0.3761	-0.2797	-0.7544	-0.1921	-0.5801	-1.5285	0.1702	0.8774	-0.5107	0.354
revisit-10mmOut3mmIn-10s	10	12	-0.8988	-1.2784	-0.5942	0.0242	-0.492	-0.7005	0.0196	4.4138	-0.6721	-0.4555	-0.7311	0.1932	-1.1099	-1.5614	-0.0471	-0.1474	-0.3383	-0.0798	-0.298	0.2366	1.2691	-0.4336	-0.2889	-0.1759	-0.5887	-1.6316	-0.723	-0.1189	0.5439	-0.8745	-0.1494	-0.0817	-0.404	0.5585	-0.2855	-0.3638	1.241	-0.5359	-0.1714	-0.6313	-0.333	-0.1076	-1.466	0.0927	0.6417	-0.5421	0.9738
revisit-10mmOut3mmIn-10s	12	14	-0.2069	-1.0657	-0.5962	0.6107	-0.0206	-0.7166	0.2755	4.8849	-0.3315	0.547	-0.2332	0.0511	-1.5555	-1.4523	0.6386	-0.0311	-0.6836	0.1881	-0.0586	0.4628	0.9061	-0.2269	-0.5043	0.1921	-0.7463	-1.951	-0.8562	-0.1307	0.7635	-0.9371	-0.1154	0.2638	-0.678	0.4988	-0.3227	-0.3661	0.3466	-0.6824	-0.566	-0.488	-0.1358	-0.0892	-1.9481	0.4958	1.019	-0.3638	1.7395
[truncated: 22 more columns]
