# Supplementary material for: Neural circuit mechanisms for transforming learned olfactory valences into wind-oriented movement
Source: eLife. 2023 Sep 18;12:e85756. doi: 10.7554/eLife.85756 (PMC10588983; doi:10.7554/eLife.85756)
Supplement: Figure 4—figure supplement 1—source data 1. [file elife-85756-fig4-figsupp1-data1.xlsx]

## Sheet: Sheet1
	Axon		Dendrite
Sec	Mean	SEM	Mean	SEM
-7	0.0119097	0.00921768	0.0121914	0.00772478
-6	-0.0100529	0.00407716	0.0035339	0.0103722
-5	-0.000407809	0.0102894	-0.00380107	0.00848363
-4	0.00689565	0.00525434	0.0128913	0.008724
-3	-0.00692128	0.00930576	-0.00157262	0.00798003
-2	0.0030002	0.0107304	-0.00656039	0.00889897
-1	0.00391494	0.00819946	-0.00874969	0.00997027
0	-0.00833849	0.00793395	-0.00793279	0.0116999
1	0.0898935	0.0184088	0.0564696	0.0135932
2	0.565536	0.100216	0.721151	0.156339
3	0.602015	0.109499	0.7906	0.162363
4	0.524646	0.0995353	0.689759	0.147988
5	0.394192	0.0816643	0.554581	0.122987
6	0.329959	0.0769102	0.441517	0.110112
7	0.241089	0.0627422	0.393795	0.0993185
8	0.215817	0.0416242	0.322838	0.0866958
9	0.136499	0.0374099	0.256902	0.0682725
10	0.105967	0.0257758	0.214706	0.066115
11	0.09098	0.0190917	0.197686	0.0590502
12	0.0908284	0.0241814	0.183282	0.0519666
13	0.0432754	0.0119687	0.120892	0.0427915
14	0.0393076	0.0109547	0.108439	0.0333458
15	0.0297568	0.0105013	0.0934761	0.0236915
16	0.0300927	0.012422	0.0805505	0.0246995
17	0.0188228	0.0094903	0.0668385	0.0195241
18	0.018862	0.0118825	0.043072	0.0234569
19	0.0104746	0.0144625	0.0322059	0.0148827
20	0.0133961	0.00978851	0.0136868	0.015363
21	0.00416724	0.0116917	0.0256523	0.0162649
22	0.00297051	0.0124642	0.0066144	0.0144927
23	0.00773866	0.0104894	0.0034691	0.0132561
24	-0.0159846	0.0125731	-0.0133609	0.00517198
25	-0.000815984	0.00920887	-0.0128972	0.00534539
26	0.00550721	0.0128991	-0.00318015	0.0110374
27	-0.0073189	0.0078004	-0.00125823	0.0107377
28	0.00852432	0.0112021	-0.0108578	0.0106385
29	-0.000356913	0.0177693	-0.0210995	0.0119366
30	-0.0124229	0.0117808	-0.0244218	0.00877966
