# Supplementary material for: Neural circuit mechanisms for transforming learned olfactory valences into wind-oriented movement
Source: eLife. 2023 Sep 18;12:e85756. doi: 10.7554/eLife.85756 (PMC10588983; doi:10.7554/eLife.85756)
Supplement: Figure 4—source data 1. [file elife-85756-fig4-data1.xlsx]

## Sheet: Sheet1
	Baseline-subtracted membrane potentials (mV)
	Gray									Green				Black
Time (x10^-4) (sec)	Fly1	Fly2	Fly3	Fly4	Fly5	Fly6	Fly7	Fly8		Fly1	Fly2	Fly3
1	0.126998	0.138076	0.050725	-0.159339	0.103113	0.196793	-0.0498617	-0.0463245		-0.305637	-0.163864	-0.239483		-1.08014
2	0.126971	0.13777	0.0507769	-0.158952	0.102435	0.196096	-0.0497308	-0.0442431		-0.307401	-0.167343	-0.238536		-1.07685
3	0.126943	0.137453	0.050833	-0.158554	0.101756	0.195381	-0.0496048	-0.0421391		-0.309202	-0.17082	-0.23757		-1.11958
4	0.126911	0.137124	0.0508933	-0.158143	0.101077	0.194647	-0.049484	-0.0400128		-0.311038	-0.174292	-0.236584		-1.1656
5	0.126878	0.136784	0.0509579	-0.157721	0.100398	0.193894	-0.0493684	-0.0378646		-0.31291	-0.177758	-0.235578		-1.23134
6	0.126841	0.136432	0.0510269	-0.157288	0.0997185	0.193123	-0.049258	-0.0356947		-0.314819	-0.181215	-0.234553		-1.20176
7	0.126802	0.136069	0.0511003	-0.156842	0.0990386	0.192333	-0.049153	-0.0335035		-0.316764	-0.184661	-0.233508		-1.21819
8	0.126759	0.135694	0.0511781	-0.156386	0.0983583	0.191524	-0.0490534	-0.0312915		-0.318746	-0.188094	-0.232444		-1.18204
9	0.126714	0.135308	0.0512605	-0.155918	0.0976773	0.190697	-0.0489593	-0.029059		-0.320764	-0.191512	-0.231361		-1.14587
10	0.126665	0.13491	0.0513474	-0.15544	0.0969957	0.189852	-0.0488708	-0.0268065		-0.322819	-0.194913	-0.23026		-1.23463
11	0.126612	0.1345	0.051439	-0.15495	0.0963133	0.188988	-0.048788	-0.0245344		-0.324912	-0.198294	-0.229139		-1.20176
12	0.126557	0.134079	0.0515352	-0.154449	0.0956301	0.188106	-0.0487109	-0.0222431		-0.327042	-0.201653	-0.227999		-1.23463
13	0.126497	0.133646	0.0516361	-0.153938	0.094946	0.187206	-0.0486398	-0.0199332		-0.329209	-0.204989	-0.226841		-1.25435
14	0.126434	0.133202	0.0517416	-0.153416	0.0942609	0.186288	-0.0485746	-0.017605		-0.331414	-0.2083	-0.225665		-1.26749
15	0.126366	0.132746	0.0518519	-0.152884	0.0935749	0.185352	-0.0485154	-0.0152591		-0.333656	-0.211583	-0.22447		-1.34309
16	0.126295	0.132279	0.0519669	-0.152342	0.0928878	0.184398	-0.0484624	-0.012896		-0.335937	-0.214836	-0.223257		-1.33324
17	0.12622	0.1318	0.0520866	-0.15179	0.0921996	0.183426	-0.0484157	-0.0105161		-0.338256	-0.218058	-0.222026		-1.42527
18	0.126141	0.131309	0.0522111	-0.151228	0.0915102	0.182437	-0.0483753	-0.0081201		-0.340613	-0.221247	-0.220778		-1.48772
19	0.126057	0.130807	0.0523403	-0.150656	0.0908198	0.18143	-0.0483414	-0.00570841		-0.343007	-0.2244	-0.219512		-1.4417
20	0.125969	0.130293	0.0524743	-0.150075	0.0901281	0.180407	-0.0483141	-0.00328159		-0.345441	-0.227517	-0.218228		-1.46143
21	0.125877	0.129769	0.052613	-0.149484	0.0894353	0.179366	-0.0482934	-0.000840191		-0.347912	-0.230596	-0.216928		-1.44828
22	0.125781	0.129232	0.0527564	-0.148885	0.0887412	0.178309	-0.0482795	0.00161525		-0.350421	-0.233635	-0.215611		-1.46471
23	0.12568	0.128685	0.0529045	-0.148277	0.0880459	0.177235	-0.0482725	0.00408417		-0.352968	-0.236632	-0.214277		-1.56332
24	0.125575	0.128126	0.0530573	-0.14766	0.0873494	0.176145	-0.0482726	0.00656605		-0.355554	-0.239586	-0.212926		-1.64221
25	0.125465	0.127557	0.0532148	-0.147034	0.0866516	0.175039	-0.0482797	0.00906034		-0.358177	-0.242497	-0.211559		-1.60277
26	0.125351	0.126976	0.053377	-0.146401	0.0859526	0.173917	-0.0482941	0.0115665		-0.360838	-0.245361	-0.210177		-1.66522
27	0.125233	0.126384	0.0535437	-0.145759	0.0852524	0.17278	-0.0483158	0.014084		-0.363536	-0.24818	-0.208778		-1.6948
28	0.12511	0.125782	0.0537151	-0.14511	0.0845509	0.171627	-0.048345	0.0166123		-0.366271	-0.25095	-0.207364		-1.6192
29	0.124982	0.125168	0.053891	-0.144453	0.0838482	0.170459	-0.0483817	0.0191509		-0.369044	-0.253672	-0.205935		-1.74411
30	0.124851	0.124545	0.0540714	-0.143788	0.0831443	0.169277	-0.0484262	0.0216993		-0.371853	-0.256344	-0.204491		-1.73753
31	0.124714	0.12391	0.0542562	-0.143116	0.0824393	0.16808	-0.0484783	0.024257		-0.374698	-0.258965	-0.203032		-1.75069
32	0.124574	0.123265	0.0544455	-0.142438	0.081733	0.166869	-0.0485384	0.0268234		-0.37758	-0.261535	-0.201558		-1.71452
33	0.124429	0.12261	0.0546392	-0.141752	0.0810257	0.165644	-0.0486064	0.029398		-0.380497	-0.264052	-0.20007		-1.70138
34	0.12428	0.121944	0.0548372	-0.14106	0.0803173	0.164405	-0.0486825	0.0319802		-0.383449	-0.266516	-0.198569		-1.79013
35	0.124127	0.121269	0.0550395	-0.140361	0.0796078	0.163153	-0.0487667	0.0345696		-0.386436	-0.268926	-0.197053		-1.83943
36	0.12397	0.120583	0.055246	-0.139656	0.0788974	0.161889	-0.0488591	0.0371657		-0.389458	-0.271282	-0.195524		-1.80656
37	0.123809	0.119887	0.0554567	-0.138945	0.078186	0.160611	-0.0489597	0.0397678		-0.392512	-0.273582	-0.193981		-1.86572
38	0.123644	0.119182	0.0556715	-0.138228	0.0774737	0.159321	-0.0490687	0.0423754		-0.3956	-0.275827	-0.192425		-1.86572
39	0.123475	0.118467	0.0558904	-0.137505	0.0767606	0.158019	-0.0491861	0.0449882		-0.398721	-0.278015	-0.190856		-1.82628
40	0.123302	0.117742	0.0561132	-0.136777	0.0760467	0.156705	-0.0493119	0.0476053		-0.401873	-0.280146	-0.189275		-1.9216
41	0.123126	0.117008	0.05634	-0.136044	0.0753322	0.155379	-0.0494462	0.0502265		-0.405056	-0.28222	-0.18768		-1.83943
42	0.122946	0.116265	0.0565706	-0.135306	0.074617	0.154042	-0.049589	0.0528511		-0.40827	-0.284237	-0.186073		-1.86901
43	0.122762	0.115513	0.0568051	-0.134563	0.0739012	0.152695	-0.0497403	0.0554786		-0.411514	-0.286197	-0.184453		-1.88544
44	0.122575	0.114751	0.0570432	-0.133815	0.0731851	0.151336	-0.0499003	0.0581084		-0.414787	-0.288098	-0.182821		-1.92818
45	0.122385	0.113981	0.0572849	-0.133063	0.0724685	0.149968	-0.0500689	0.0607401		-0.418089	-0.289942	-0.181177		-1.92489
46	0.122191	0.113202	0.0575303	-0.132306	0.0717517	0.14859	-0.0502461	0.0633731		-0.421418	-0.291729	-0.17952		-1.91503
47	0.121995	0.112414	0.057779	-0.131545	0.0710347	0.147202	-0.0504321	0.0660069		-0.424774	-0.293457	-0.177852		-1.93803
48	0.121795	0.111618	0.0580311	-0.13078	0.0703176	0.145805	-0.0506268	0.068641		-0.428155	-0.295129	-0.176171		-2.00706
49	0.121593	0.110814	0.0582865	-0.130012	0.0696005	0.144399	-0.0508303	0.0712748		-0.431562	-0.296743	-0.174479		-2.12868
50	0.121387	0.110001	0.058545	-0.129239	0.0688835	0.142984	-0.0510426	0.0739078		-0.434992	-0.298301	-0.172774		-1.98077
51	0.12118	0.109181	0.0588066	-0.128463	0.0681667	0.141561	-0.0512637	0.0765394		-0.438446	-0.299803	-0.171058		-2.02022
52	0.120969	0.108353	0.059071	-0.127684	0.0674501	0.140131	-0.0514937	0.0791693		-0.441922	-0.301249	-0.169331		-1.9972
53	0.120756	0.107517	0.0593383	-0.126901	0.0667338	0.138693	-0.0517325	0.0817967		-0.445419	-0.30264	-0.167591		-1.93147
54	0.120541	0.106674	0.0596083	-0.126115	0.066018	0.137248	-0.0519803	0.0844212		-0.448936	-0.303976	-0.16584		-1.9742
55	0.120324	0.105824	0.0598809	-0.125326	0.0653027	0.135796	-0.052237	0.0870423		-0.452472	-0.305259	-0.164078		-1.95119
56	0.120104	0.104967	0.0601559	-0.124534	0.064588	0.134338	-0.0525027	0.0896594		-0.456027	-0.30649	-0.162304		-2.01364
57	0.119882	0.104103	0.0604332	-0.12374	0.0638739	0.132874	-0.0527774	0.092272		-0.459599	-0.307669	-0.160519		-1.99063
58	0.119659	0.103232	0.0607126	-0.122943	0.0631606	0.131404	-0.053061	0.0948796		-0.463188	-0.308797	-0.158723		-1.96762
59	0.119433	0.102355	0.0609941	-0.122143	0.0624481	0.129929	-0.0533537	0.0974817		-0.466792	-0.309877	-0.156915		-1.81313
60	0.119206	0.101472	0.0612774	-0.121341	0.0617365	0.128449	-0.0536553	0.100078		-0.470411	-0.310908	-0.155096		-1.86572
61	0.118977	0.100582	0.0615624	-0.120537	0.0610259	0.126965	-0.0539659	0.102667		-0.474044	-0.311894	-0.153266		-1.86243
62	0.118746	0.099687	0.0618491	-0.119731	0.0603163	0.125477	-0.0542856	0.10525		-0.477689	-0.312834	-0.151425		-1.8723
63	0.118514	0.0987862	0.0621371	-0.118923	0.0596077	0.123985	-0.0546141	0.107824		-0.481346	-0.313731	-0.149573		-1.83286
64	0.11828	0.0978799	0.0624264	-0.118113	0.0589003	0.122489	-0.0549516	0.110391		-0.485015	-0.314586	-0.14771		-1.80985
65	0.118044	0.0969684	0.0627168	-0.117301	0.058194	0.120991	-0.0552981	0.112949		-0.488693	-0.315401	-0.145837		-1.83943
66	0.117807	0.0960518	0.0630082	-0.116488	0.057489	0.11949	-0.0556534	0.115499		-0.49238	-0.316179	-0.143952		-1.79999
67	0.117569	0.0951304	0.0633004	-0.115673	0.0567852	0.117986	-0.0560175	0.118038		-0.496075	-0.31692	-0.142057		-1.846
68	0.11733	0.0942044	0.0635932	-0.114857	0.0560828	0.116481	-0.0563905	0.120568		-0.499778	-0.317626	-0.140151		-1.91174
69	0.117089	0.093274	0.0638864	-0.11404	0.0553817	0.114974	-0.0567722	0.123087		-0.503487	-0.318301	-0.138234		-1.88873
70	0.116847	0.0923394	0.0641799	-0.113221	0.054682	0.113466	-0.0571627	0.125596		-0.507201	-0.318945	-0.136306		-1.84271
71	0.116605	0.0914008	0.0644736	-0.112402	0.0539837	0.111958	-0.0575618	0.128093		-0.51092	-0.319561	-0.134368		-1.84929
72	0.116361	0.0904585	0.0647671	-0.111582	0.0532869	0.110449	-0.0579695	0.130579		-0.514643	-0.320151	-0.13242		-1.86901
73	0.116116	0.0895128	0.0650605	-0.110761	0.0525916	0.10894	-0.0583859	0.133052		-0.518369	-0.320717	-0.13046		-1.71124
74	0.11587	0.0885638	0.0653535	-0.10994	0.0518979	0.107432	-0.0588107	0.135513		-0.522097	-0.32126	-0.128491		-1.78355
75	0.115623	0.0876119	0.0656459	-0.109119	0.0512057	0.105925	-0.059244	0.137961		-0.525827	-0.321784	-0.126511		-1.80985
76	0.115376	0.0866573	0.0659376	-0.108297	0.0505152	0.104419	-0.0596857	0.140396		-0.529559	-0.322291	-0.12452		-1.88216
77	0.115128	0.0857002	0.0662284	-0.107475	0.0498264	0.102915	-0.0601357	0.142818		-0.533292	-0.322781	-0.12252		-1.9216
78	0.114879	0.084741	0.0665182	-0.106653	0.0491393	0.101413	-0.060594	0.145225		-0.537025	-0.323258	-0.120509		-1.95119
79	0.11463	0.0837798	0.0668068	-0.105832	0.048454	0.0999133	-0.0610604	0.147618		-0.540758	-0.323724	-0.118488		-1.9479
80	0.114381	0.0828171	0.0670941	-0.10501	0.0477705	0.0984171	-0.0615348	0.149997		-0.544491	-0.324181	-0.116458		-1.87559
81	0.114131	0.081853	0.0673799	-0.104189	0.0470888	0.0969244	-0.0620172	0.152361		-0.548223	-0.32463	-0.114418		-1.89202
82	0.113881	0.0808878	0.067664	-0.103369	0.046409	0.0954356	-0.0625075	0.154709		-0.551955	-0.325075	-0.112369		-1.85587
83	0.11363	0.0799218	0.0679464	-0.102549	0.0457312	0.0939513	-0.0630055	0.157042		-0.555686	-0.325517	-0.110311		-1.90517
84	0.11338	0.0789553	0.0682269	-0.10173	0.0450554	0.0924718	-0.0635112	0.159359		-0.559415	-0.325959	-0.108244		-1.8986
85	0.113129	0.0779886	0.0685053	-0.100912	0.0443816	0.0909977	-0.0640244	0.16166		-0.563143	-0.326402	-0.106168		-1.93803
86	0.112878	0.0770219	0.0687816	-0.100094	0.0437099	0.0895292	-0.0645451	0.163944		-0.566869	-0.32685	-0.104084		-1.84271
87	0.112628	0.0760556	0.0690555	-0.0992784	0.0430403	0.088067	-0.0650732	0.166212		-0.570593	-0.327303	-0.101992		-1.94461
88	0.112378	0.0750899	0.0693269	-0.0984637	0.0423729	0.0866114	-0.0656085	0.168463		-0.574315	-0.327765	-0.0998916		-1.89531
89	0.112128	0.074125	0.0695958	-0.0976503	0.0417078	0.0851628	-0.0661509	0.170696		-0.578034	-0.328237	-0.097784		-1.90517
90	0.111879	0.0731613	0.0698619	-0.0968384	0.0410449	0.0837217	-0.0667003	0.172912		-0.581751	-0.328722	-0.0956693		-1.89531
91	0.11163	0.072199	0.0701252	-0.0960281	0.0403844	0.0822885	-0.0672566	0.17511		-0.585464	-0.329222	-0.0935475		-1.94461
92	0.111382	0.0712384	0.0703855	-0.0952195	0.0397263	0.0808636	-0.0678198	0.177291		-0.589174	-0.329739	-0.0914191		-1.92818
93	0.111135	0.0702797	0.0706427	-0.0944126	0.0390706	0.0794474	-0.0683897	0.179453		-0.592881	-0.330274	-0.0892842		-1.92489
94	0.110888	0.0693232	0.0708967	-0.0936076	0.0384174	0.0780403	-0.0689662	0.181598		-0.596583	-0.330831	-0.0871432		-1.87559
95	0.110642	0.0683691	0.0711474	-0.0928046	0.0377667	0.0766426	-0.0695492	0.183723		-0.600281	-0.331412	-0.0849963		-1.87888
96	0.110397	0.0674177	0.0713946	-0.0920035	0.0371186	0.0752548	-0.0701386	0.185831		-0.603975	-0.332017	-0.0828437		-1.9216
97	0.110153	0.0664691	0.0716383	-0.0912044	0.0364731	0.0738771	-0.0707344	0.18792		-0.607665	-0.33265	-0.0806857		-1.83943
98	0.109911	0.0655237	0.0718783	-0.0904075	0.0358303	0.0725101	-0.0713364	0.189991		-0.611349	-0.333312	-0.0785225		-1.78683
99	0.109669	0.0645816	0.0721146	-0.0896128	0.0351903	0.0711539	-0.0719446	0.192042		-0.615028	-0.334005	-0.0763543		-1.86901
100	0.109429	0.0636431	0.0723469	-0.0888202	0.034553	0.0698089	-0.0725589	0.194076		-0.618702	-0.33473	-0.0741813		-1.80656
101	0.109191	0.0627084	0.0725754	-0.0880299	0.0339185	0.0684755	-0.0731791	0.196091		-0.62237	-0.335491	-0.0720039		-1.77697
102	0.108954	0.0617776	0.0727997	-0.0872419	0.0332869	0.067154	-0.0738053	0.198087		-0.626032	-0.336288	-0.069822		-1.78683
103	0.108719	0.0608511	0.0730199	-0.0864561	0.0326583	0.0658446	-0.0744374	0.200065		-0.629689	-0.337122	-0.0676361		-1.85587
104	0.108485	0.0599289	0.0732359	-0.0856727	0.0320326	0.0645477	-0.0750752	0.202024		-0.63334	-0.337997	-0.0654462		-1.70138
105	0.108254	0.0590114	0.0734475	-0.0848915	0.03141	0.0632635	-0.0757186	0.203965		-0.636985	-0.338912	-0.0632525		-1.74411
106	0.108024	0.0580986	0.0736547	-0.0841127	0.0307905	0.0619924	-0.0763678	0.205888		-0.640624	-0.33987	-0.0610552		-1.70795
107	0.107796	0.0571908	0.0738575	-0.0833362	0.0301741	0.0607345	-0.0770224	0.207793		-0.644257	-0.340872	-0.0588546		-1.70138
108	0.107571	0.0562882	0.0740556	-0.082562	0.0295609	0.0594902	-0.0776826	0.209679		-0.647885	-0.341919	-0.0566507		-1.77697
109	0.107348	0.0553909	0.0742492	-0.08179	0.0289509	0.0582598	-0.0783482	0.211548		-0.651508	-0.343013	-0.0544438		-1.64879
110	0.107127	0.0544992	0.074438	-0.0810204	0.0283443	0.0570435	-0.0790192	0.213399		-0.655125	-0.344154	-0.0522339		-1.65865
111	0.106909	0.0536133	0.074622	-0.0802529	0.0277409	0.0558416	-0.0796955	0.215233		-0.658738	-0.345344	-0.0500213		-1.62249
112	0.106694	0.0527333	0.0748012	-0.0794877	0.027141	0.0546543	-0.0803771	0.217049		-0.662346	-0.346584	-0.0478061		-1.67179
113	0.106481	0.0518595	0.0749755	-0.0787247	0.0265444	0.0534819	-0.081064	0.218847		-0.66595	-0.347874	-0.0455884		-1.57976
114	0.106271	0.0509919	0.0751448	-0.0779638	0.0259512	0.0523246	-0.081756	0.220629		-0.669549	-0.349215	-0.0433684		-1.58962
115	0.106064	0.0501309	0.075309	-0.077205	0.0253616	0.0511827	-0.0824532	0.222393		-0.673146	-0.350608	-0.0411462		-1.58305
116	0.10586	0.0492766	0.0754681	-0.0764484	0.0247754	0.0500564	-0.0831555	0.224141		-0.676739	-0.352054	-0.0389218		-1.6685
117	0.105658	0.0484292	0.0756221	-0.0756938	0.0241928	0.048946	-0.0838628	0.225872		-0.68033	-0.353553	-0.0366955		-1.57318
118	0.105461	0.0475888	0.0757709	-0.0749412	0.0236138	0.0478517	-0.0845752	0.227586		-0.683919	-0.355105	-0.0344672		-1.60277
119	0.105266	0.0467557	0.0759145	-0.0741906	0.0230383	0.0467738	-0.0852925	0.229284		-0.687507	-0.356711	-0.0322371		-1.51402
120	0.105074	0.0459301	0.0760527	-0.073442	0.0224664	0.0457123	-0.0860148	0.230965		-0.691094	-0.35837	-0.0300053		-1.55675
121	0.104887	0.0451121	0.0761857	-0.0726952	0.0218982	0.0446676	-0.086742	0.232631		-0.694682	-0.360083	-0.0277718		-1.50087
122	0.104702	0.0443019	0.0763133	-0.0719503	0.0213336	0.0436399	-0.0874741	0.234281		-0.69827	-0.361849	-0.0255368		-1.53703
123	0.104521	0.0434998	0.0764355	-0.0712073	0.0207727	0.0426293	-0.0882111	0.235915		-0.70186	-0.363668	-0.0233002		-1.5699
124	0.104344	0.0427058	0.0765523	-0.070466	0.0202154	0.0416361	-0.0889528	0.237533		-0.705453	-0.36554	-0.0210623		-1.47786
125	0.104171	0.0419202	0.0766636	-0.0697264	0.0196618	0.0406604	-0.0896994	0.239136		-0.709049	-0.367464	-0.0188229		-1.48772
126	0.104001	0.0411431	0.0767694	-0.0689884	0.019112	0.0397023	-0.0904507	0.240724		-0.712649	-0.369439	-0.0165822		-1.55346
127	0.103836	0.0403748	0.0768698	-0.0682521	0.0185658	0.0387622	-0.0912068	0.242297		-0.716254	-0.371464	-0.0143401		-1.5436
128	0.103674	0.0396153	0.0769645	-0.0675172	0.0180234	0.03784	-0.0919675	0.243855		-0.719865	-0.373539	-0.0120967		-1.51402
129	0.103517	0.0388649	0.0770538	-0.0667839	0.0174847	0.036936	-0.0927329	0.245398		-0.723483	-0.375661	-0.00985197		-1.57647
130	0.103363	0.0381237	0.0771375	-0.066052	0.0169498	0.0360503	-0.093503	0.246927		-0.727108	-0.377831	-0.00760588		-1.56332
131	0.103214	0.0373919	0.0772155	-0.0653215	0.0164186	0.035183	-0.0942776	0.248441		-0.730741	-0.380045	-0.00535841		-1.47458
132	0.10307	0.0366696	0.0772881	-0.0645922	0.0158911	0.0343343	-0.0950568	0.249941		-0.734384	-0.382302	-0.00310953		-1.50744
133	0.10293	0.035957	0.077355	-0.0638642	0.0153674	0.0335042	-0.0958405	0.251427		-0.738036	-0.384602	-0.000859214		-1.57976
134	0.102794	0.0352542	0.0774163	-0.0631373	0.0148474	0.0326929	-0.0966286	0.252899		-0.741699	-0.38694	0.00139258		-1.63892
135	0.102663	0.0345615	0.077472	-0.0624115	0.0143311	0.0319004	-0.0974211	0.254357		-0.745373	-0.389316	0.0036459		-1.55346
136	0.102537	0.0338788	0.0775222	-0.0616868	0.0138185	0.0311269	-0.098218	0.255802		-0.749057	-0.391727	0.00590079		-1.50744
137	0.102416	0.0332065	0.0775668	-0.0609629	0.0133097	0.0303725	-0.0990192	0.257232		-0.752754	-0.394171	0.00815732		-1.58962
138	0.1023	0.0325446	0.0776058	-0.06024	0.0128046	0.0296372	-0.0998246	0.25865		-0.756462	-0.396645	0.0104156		-1.58305
139	0.102188	0.0318933	0.0776394	-0.0595178	0.0123031	0.0289211	-0.100634	0.260054		-0.760182	-0.399147	0.0126756		-1.68822
140	0.102082	0.0312527	0.0776674	-0.0587963	0.0118054	0.0282244	-0.101448	0.261445		-0.763914	-0.401674	0.0149375		-1.61591
141	0.101981	0.0306229	0.07769	-0.0580754	0.0113112	0.027547	-0.102265	0.262823		-0.767659	-0.404223	0.0172014		-1.68166
142	0.101885	0.0300042	0.0777072	-0.0573551	0.0108207	0.026889	-0.103087	0.264188		-0.771415	-0.406791	0.0194673		-1.73425
143	0.101795	0.0293966	0.077719	-0.0566352	0.0103338	0.0262505	-0.103912	0.265541		-0.775184	-0.409375	0.0217355		-1.85258
144	0.10171	0.0288002	0.0777255	-0.0559158	0.00985045	0.0256316	-0.104742	0.26688		-0.778964	-0.411972	0.0240059		-1.83614
145	0.10163	0.0282153	0.0777268	-0.0551966	0.00937064	0.0250322	-0.105575	0.268207		-0.782755	-0.41458	0.0262788		-1.91174
146	0.101556	0.0276417	0.0777228	-0.0544777	0.00889433	0.0244524	-0.106411	0.269522		-0.786558	-0.417194	0.0285543		-1.85915
147	0.101488	0.0270798	0.0777137	-0.0537589	0.0084215	0.0238921	-0.107251	0.270824		-0.79037	-0.419812	0.0308325		-1.82957
148	0.101425	0.0265296	0.0776995	-0.0530403	0.0079521	0.0233514	-0.108094	0.272113		-0.794193	-0.42243	0.0331136		-1.83943
149	0.101368	0.0259911	0.0776803	-0.0523218	0.00748611	0.0228303	-0.108941	0.27339		-0.798024	-0.425045	0.0353976		-1.88216
150	0.101317	0.0254645	0.0776561	-0.0516033	0.00702348	0.0223288	-0.109791	0.274655		-0.801865	-0.427655	0.0376849		-1.86901
151	0.101271	0.0249498	0.0776271	-0.0508848	0.00656417	0.0218468	-0.110644	0.275907		-0.805713	-0.430255	0.0399755		-1.89531
152	0.101232	0.0244472	0.0775933	-0.0501663	0.00610814	0.0213842	-0.1115	0.277147		-0.809569	-0.432842	0.0422696		-1.9972
153	0.101198	0.0239567	0.0775548	-0.0494477	0.00565535	0.020941	-0.112359	0.278374		-0.81343	-0.435413	0.0445674		-1.87559
154	0.101171	0.0234783	0.0775116	-0.048729	0.00520574	0.0205172	-0.113221	0.279589		-0.817298	-0.437965	0.0468691		-1.94461
155	0.101149	0.0230123	0.0774639	-0.0480103	0.00475929	0.0201127	-0.114085	0.280791		-0.82117	-0.440494	0.049175		-1.96762
156	0.101134	0.0225585	0.0774118	-0.0472914	0.00431593	0.0197274	-0.114952	0.28198		-0.825045	-0.442997	0.0514851		-1.92489
157	0.101125	0.0221171	0.0773554	-0.0465723	0.00387563	0.0193612	-0.115821	0.283156		-0.828924	-0.445471	0.0537998		-1.94461
158	0.101122	0.0216882	0.0772948	-0.0458532	0.00343835	0.019014	-0.116693	0.28432		-0.832804	-0.447911	0.0561192		-1.88216
159	0.101126	0.0212718	0.07723	-0.0451339	0.00300404	0.0186857	-0.117567	0.285471		-0.836685	-0.450316	0.0584435		-1.9479
160	0.101136	0.020868	0.0771613	-0.0444145	0.00257266	0.0183763	-0.118444	0.286609		-0.840565	-0.452682	0.0607731		-1.95119
161	0.101152	0.0204768	0.0770887	-0.0436949	0.00214417	0.0180855	-0.119322	0.287734		-0.844445	-0.455005	0.063108		-1.98405
162	0.101175	0.0200983	0.0770123	-0.0429753	0.00171855	0.0178132	-0.120202	0.288845		-0.848323	-0.457282	0.0654485		-2.06294
163	0.101204	0.0197325	0.0769323	-0.0422555	0.00129575	0.0175594	-0.121084	0.289943		-0.852198	-0.45951	0.0677948		-2.02678
164	0.101239	0.0193795	0.0768489	-0.0415357	0.000875735	0.0173238	-0.121967	0.291028		-0.856069	-0.461685	0.0701471		-2.0465
165	0.101281	0.0190394	0.076762	-0.0408157	0.000458486	0.0171064	-0.122852	0.292099		-0.859935	-0.463806	0.0725056		-2.09911
166	0.10133	0.0187122	0.076672	-0.0400957	4.39736e-05	0.0169069	-0.123738	0.293157		-0.863795	-0.465867	0.0748705		-2.0498
167	0.101385	0.0183979	0.0765789	-0.0393756	-0.000367825	0.0167252	-0.124626	0.294201		-0.86765	-0.467867	0.0772419		-2.11224
168	0.101447	0.0180966	0.0764828	-0.0386554	-0.000776928	0.0165611	-0.125514	0.295232		-0.871497	-0.469801	0.0796199		-2.06952
169	0.101516	0.0178084	0.076384	-0.0379352	-0.00118335	0.0164145	-0.126404	0.296248		-0.875336	-0.471668	0.0820048		-2.0498
170	0.101591	0.0175331	0.0762826	-0.037215	-0.0015871	0.0162851	-0.127294	0.297251		-0.879166	-0.473464	0.0843966		-2.21743
171	0.101673	0.0172709	0.0761786	-0.0364947	-0.0019882	0.0161727	-0.128185	0.298239		-0.882986	-0.475187	0.0867954		-2.16155
172	0.101762	0.0170219	0.0760723	-0.0357744	-0.00238665	0.0160772	-0.129076	0.299214		-0.886797	-0.476833	0.0892012		-2.13525
173	0.101858	0.0167859	0.0759639	-0.0350541	-0.00278247	0.0159984	-0.129968	0.300174		-0.890596	-0.478401	0.0916143		-2.17799
174	0.101961	0.0165631	0.0758533	-0.0343338	-0.00317567	0.015936	-0.13086	0.30112		-0.894383	-0.479887	0.0940345		-2.1747
175	0.10207	0.0163534	0.0757409	-0.0336134	-0.00356626	0.0158898	-0.131753	0.302052		-0.898157	-0.48129	0.096462		-2.23715
176	0.102186	0.0161569	0.0756267	-0.032893	-0.00395426	0.0158596	-0.132645	0.30297		-0.901917	-0.482607	0.0988967		-2.28317
177	0.102309	0.0159736	0.0755108	-0.0321725	-0.0043397	0.0158453	-0.133538	0.303873		-0.905664	-0.483837	0.101339		-2.25031
178	0.102439	0.0158034	0.0753935	-0.031452	-0.0047226	0.0158465	-0.134431	0.304763		-0.909395	-0.484976	0.103788		-2.33247
179	0.102576	0.0156463	0.0752748	-0.0307315	-0.00510298	0.0158629	-0.135323	0.305637		-0.91311	-0.486025	0.106244		-2.30289
180	0.102719	0.0155023	0.0751549	-0.0300109	-0.00548087	0.0158945	-0.136215	0.306498		-0.916809	-0.486981	0.108707		-2.28645
181	0.10287	0.0153715	0.0750339	-0.0292902	-0.0058563	0.0159409	-0.137107	0.307344		-0.920491	-0.487842	0.111177		-2.34892
182	0.103027	0.0152537	0.074912	-0.0285695	-0.0062293	0.0160018	-0.137998	0.308176		-0.924155	-0.488607	0.113654		-2.36534
183	0.103191	0.0151489	0.0747892	-0.0278487	-0.00659988	0.016077	-0.138889	0.308993		-0.9278	-0.489274	0.116137		-2.37849
184	0.103361	0.0150572	0.0746657	-0.0271278	-0.00696809	0.0161662	-0.139779	0.309795		-0.931426	-0.489844	0.118627		-2.39493
185	0.103538	0.0149783	0.0745417	-0.0264068	-0.00733396	0.0162692	-0.140668	0.310583		-0.935032	-0.490313	0.121123		-2.4015
186	0.103722	0.0149124	0.0744173	-0.0256858	-0.00769753	0.0163857	-0.141557	0.311357		-0.938617	-0.490683	0.123624		-2.45738
187	0.103912	0.0148594	0.0742925	-0.0249646	-0.00805882	0.0165154	-0.142444	0.312115		-0.94218	-0.49095	0.126132		-2.53298
188	0.104108	0.0148191	0.0741675	-0.0242434	-0.00841789	0.0166581	-0.143331	0.312859		-0.945722	-0.491116	0.128645		-2.50668
189	0.104311	0.0147916	0.0740424	-0.0235221	-0.00877478	0.0168134	-0.144216	0.313588		-0.94924	-0.491179	0.131162		-2.50668
190	0.104521	0.0147768	0.0739173	-0.0228006	-0.00912952	0.0169811	-0.145101	0.314303		-0.952735	-0.491138	0.133685		-2.54613
191	0.104736	0.0147745	0.0737922	-0.0220791	-0.00948217	0.017161	-0.145984	0.315002		-0.956206	-0.490993	0.136211		-2.61187
192	0.104958	0.0147849	0.0736673	-0.0213575	-0.00983275	0.0173527	-0.146866	0.315687		-0.959652	-0.490744	0.138741		-2.66446
193	0.105185	0.0148076	0.0735427	-0.0206358	-0.0101813	0.0175561	-0.147747	0.316357		-0.963072	-0.49039	0.141274		-2.65131
194	0.105419	0.0148428	0.0734184	-0.019914	-0.0105279	0.0177707	-0.148626	0.317011		-0.966466	-0.489932	0.14381		-2.67432
195	0.105658	0.0148903	0.0732944	-0.0191921	-0.0108725	0.0179964	-0.149503	0.317651		-0.969833	-0.489369	0.146348		-2.63817
196	0.105904	0.0149501	0.0731709	-0.0184702	-0.0112153	0.0182329	-0.150379	0.318276		-0.973173	-0.488701	0.148888		-2.66117
197	0.106155	0.015022	0.0730478	-0.0177482	-0.0115561	0.01848	-0.151254	0.318885		-0.976484	-0.487928	0.151428		-2.60201
198	0.106411	0.0151061	0.0729253	-0.0170262	-0.0118952	0.0187373	-0.152127	0.319479		-0.979766	-0.487051	0.153969		-2.64145
199	0.106673	0.0152022	0.0728035	-0.0163042	-0.0122324	0.0190047	-0.152998	0.320058		-0.983019	-0.48607	0.15651		-2.65131
200	0.10694	0.0153102	0.0726823	-0.0155823	-0.0125678	0.0192819	-0.153867	0.320622		-0.986242	-0.484986	0.15905		-2.54942
201	0.107213	0.0154301	0.0725617	-0.0148604	-0.0129015	0.0195686	-0.154735	0.32117		-0.989434	-0.483798	0.161588		-2.51654
202	0.10749	0.0155618	0.0724419	-0.0141385	-0.0132335	0.0198646	-0.155601	0.321702		-0.992595	-0.482509	0.164123		-2.56256
203	0.107773	0.0157053	0.0723229	-0.0134168	-0.0135638	0.0201697	-0.156465	0.32222		-0.995723	-0.481117	0.166656		-2.59543
204	0.10806	0.0158604	0.0722047	-0.0126952	-0.0138923	0.0204836	-0.157327	0.322722		-0.998819	-0.479625	0.169185		-2.62173
205	0.108352	0.0160271	0.0720872	-0.0119738	-0.0142192	0.0208062	-0.158188	0.323208		-1.00188	-0.478034	0.17171		-2.71048
206	0.108649	0.0162053	0.0719706	-0.0112526	-0.0145445	0.0211371	-0.159046	0.323679		-1.00491	-0.476343	0.17423		-2.7039
207	0.10895	0.0163949	0.0718549	-0.0105317	-0.0148681	0.0214762	-0.159903	0.324134		-1.0079	-0.474556	0.176744		-2.60858
208	0.109255	0.0165959	0.07174	-0.00981097	-0.0151902	0.0218232	-0.160757	0.324574		-1.01086	-0.472672	0.179252		-2.60201
209	0.109565	0.0168081	0.071626	-0.00909056	-0.0155107	0.022178	-0.161609	0.324998		-1.01378	-0.470694	0.181753		-2.66117
210	0.109879	0.0170316	0.0715128	-0.00837047	-0.0158297	0.0225404	-0.16246	0.325407		-1.01667	-0.468623	0.184246		-2.65788
211	0.110196	0.0172661	0.0714006	-0.00765072	-0.0161472	0.0229101	-0.163308	0.3258		-1.01952	-0.466461	0.18673		-2.74663
212	0.110518	0.0175118	0.0712893	-0.00693132	-0.0164634	0.0232871	-0.164154	0.326178		-1.02233	-0.46421	0.189205		-2.6546
213	0.110843	0.0177684	0.0711789	-0.0062123	-0.0167781	0.0236711	-0.164998	0.326541		-1.0251	-0.46187	0.19167		-2.73677
214	0.111171	0.0180359	0.0710694	-0.00549369	-0.0170916	0.024062	-0.16584	0.326889		-1.02783	-0.459445	0.194124		-2.74663
215	0.111502	0.0183142	0.0709608	-0.00477551	-0.0174038	0.0244596	-0.16668	0.327222		-1.03053	-0.456937	0.196567		-2.81237
216	0.111837	0.0186033	0.0708532	-0.00405778	-0.0177148	0.0248637	-0.167517	0.32754		-1.03318	-0.454347	0.198999		-2.80251
217	0.112174	0.018903	0.0707465	-0.00334054	-0.0180248	0.0252742	-0.168352	0.327843		-1.03579	-0.451678	0.201417		-2.75321
218	0.112514	0.0192133	0.0706408	-0.00262381	-0.0183337	0.025691	-0.169185	0.328131		-1.03836	-0.448932	0.203822		-2.79265
219	0.112857	0.0195341	0.070536	-0.00190762	-0.0186418	0.0261139	-0.170015	0.328405		-1.04089	-0.446112	0.206213		-2.80579
220	0.113201	0.0198653	0.0704321	-0.00119201	-0.0189491	0.0265429	-0.170843	0.328665		-1.04338	-0.44322	0.208589		-2.71706
221	0.113548	0.0202068	0.0703291	-0.000476997	-0.0192557	0.0269777	-0.171668	0.32891		-1.04582	-0.440258	0.210951		-2.76635
222	0.113897	0.0205585	0.070227	0.000237386	-0.0195617	0.0274182	-0.172491	0.329141		-1.04822	-0.43723	0.213296		-2.66446
223	0.114247	0.0209204	0.0701258	0.000951113	-0.0198674	0.0278644	-0.173312	0.329359		-1.05057	-0.434138	0.215626		-2.65131
224	0.114599	0.0212923	0.0700255	0.00166416	-0.0201728	0.0283162	-0.174129	0.329563		-1.05288	-0.430984	0.217938		-2.71048
225	0.114952	0.0216743	0.0699261	0.00237649	-0.0204781	0.0287734	-0.174944	0.329754		-1.05515	-0.427772	0.220234		-2.63488
226	0.115305	0.0220661	0.0698275	0.00308809	-0.0207835	0.029236	-0.175756	0.329931		-1.05736	-0.424504	0.222512		-2.60201
227	0.11566	0.0224677	0.0697297	0.00379894	-0.0210891	0.029704	-0.176566	0.330096		-1.05954	-0.421184	0.224771		-2.63488
228	0.116015	0.022879	0.0696328	0.004509	-0.0213951	0.0301771	-0.177372	0.330248		-1.06166	-0.417814	0.227013		-2.63159
229	0.11637	0.0232999	0.0695367	0.00521826	-0.0217018	0.0306555	-0.178175	0.330387		-1.06374	-0.414398	0.229235		-2.62173
230	0.116724	0.0237304	0.0694413	0.0059267	-0.0220094	0.0311389	-0.178976	0.330514		-1.06577	-0.410938	0.231438		-2.7039
231	0.117079	0.0241704	0.0693467	0.00663429	-0.022318	0.0316274	-0.179773	0.33063		-1.06775	-0.407438	0.233622		-2.69733
232	0.117432	0.0246196	0.0692529	0.00734102	-0.022628	0.0321209	-0.180567	0.330733		-1.06968	-0.403902	0.235786		-2.66775
233	0.117785	0.0250781	0.0691597	0.00804686	-0.0229394	0.0326194	-0.181357	0.330825		-1.07157	-0.400331	0.237929		-2.58557
234	0.118136	0.0255457	0.0690672	0.00875179	-0.0232527	0.0331228	-0.182144	0.330906		-1.0734	-0.39673	0.240053		-2.66117
235	0.118485	0.0260222	0.0689754	0.0094558	-0.0235679	0.033631	-0.182928	0.330976		-1.07518	-0.393102	0.242156		-2.71706
236	0.118833	0.0265076	0.0688841	0.0101589	-0.0238854	0.034144	-0.183708	0.331035		-1.07691	-0.38945	0.244239		-2.68089
237	0.119178	0.0270018	0.0687934	0.010861	-0.0242054	0.0346617	-0.184484	0.331084		-1.0786	-0.385778	0.246301		-2.58886
238	0.11952	0.0275045	0.0687033	0.0115621	-0.0245282	0.0351841	-0.185256	0.331122		-1.08022	-0.382088	0.248342		-2.59543
239	0.11986	0.0280157	0.0686138	0.0122622	-0.024854	0.0357112	-0.186024	0.331151		-1.0818	-0.378384	0.250363		-2.61515
240	0.120196	0.0285352	0.0685247	0.0129613	-0.025183	0.0362427	-0.186789	0.33117		-1.08332	-0.374669	0.252363		-2.56585
241	0.120528	0.0290627	0.0684361	0.0136593	-0.0255156	0.0367787	-0.187549	0.33118		-1.08479	-0.370948	0.254343		-2.56914
242	0.120856	0.0295983	0.068348	0.0143563	-0.0258519	0.0373191	-0.188304	0.331181		-1.08621	-0.367223	0.256302		-2.59543
243	0.12118	0.0301416	0.0682603	0.0150522	-0.0261923	0.0378639	-0.189055	0.331172		-1.08757	-0.363497	0.258241		-2.52312
244	0.121499	0.0306926	0.068173	0.015747	-0.0265369	0.0384128	-0.189802	0.331156		-1.08888	-0.359775	0.260159		-2.56256
245	0.121813	0.0312509	0.0680861	0.0164407	-0.0268861	0.038966	-0.190543	0.331131		-1.09013	-0.356059	0.262058		-2.49354
246	0.122122	0.0318165	0.0679995	0.0171332	-0.0272401	0.0395231	-0.19128	0.331097		-1.09133	-0.352353	0.263937		-2.51654
247	0.122424	0.0323891	0.0679133	0.0178245	-0.0275992	0.0400843	-0.192012	0.331057		-1.09247	-0.348661	0.265797		-2.59872
248	0.12272	0.0329685	0.0678273	0.0185146	-0.0279636	0.0406492	-0.192739	0.331008		-1.09356	-0.344984	0.267637		-2.58228
249	0.12301	0.0335545	0.0677415	0.0192035	-0.0283335	0.0412179	-0.19346	0.330952		-1.09459	-0.341328	0.269459		-2.58228
250	0.123293	0.0341469	0.0676559	0.0198912	-0.0287093	0.0417902	-0.194177	0.330889		-1.09556	-0.337695	0.271261		-2.56256
251	0.123568	0.0347454	0.0675705	0.0205775	-0.0290911	0.042366	-0.194887	0.33082		-1.09647	-0.334088	0.273046		-2.54942
252	0.123836	0.0353498	0.0674853	0.0212625	-0.0294793	0.0429452	-0.195592	0.330743		-1.09733	-0.33051	0.274813		-2.49682
253	0.124096	0.0359599	0.0674002	0.0219462	-0.029874	0.0435275	-0.196291	0.33066		-1.09813	-0.326964	0.276562		-2.51326
254	0.124347	0.0365754	0.0673151	0.0226286	-0.0302755	0.0441128	-0.196985	0.330572		-1.09888	-0.323454	0.278294		-2.44752
255	0.124589	0.037196	0.0672302	0.0233095	-0.0306839	0.044701	-0.197672	0.330477		-1.09956	-0.319981	0.28001		-2.38506
256	0.124823	0.0378215	0.0671453	0.0239889	-0.0310997	0.0452919	-0.198353	0.330376		-1.10019	-0.31655	0.281709		-2.36205
257	0.125047	0.0384516	0.0670604	0.0246669	-0.0315229	0.0458853	-0.199027	0.33027		-1.10076	-0.313162	0.283393		-2.39164
258	0.125261	0.0390861	0.0669756	0.0253434	-0.0319538	0.046481	-0.199695	0.330158		-1.10127	-0.30982	0.285062		-2.43766
259	0.125465	0.0397246	0.0668908	0.0260183	-0.0323926	0.0470787	-0.200357	0.330041		-1.10172	-0.306527	0.286716		-2.39164
260	0.125659	0.0403669	0.066806	0.0266916	-0.0328395	0.0476783	-0.201011	0.329919		-1.10212	-0.303285	0.288356		-2.40807
261	0.125842	0.0410126	0.0667213	0.0273632	-0.0332947	0.0482795	-0.201659	0.329792		-1.10245	-0.300096	0.289982		-2.36864
262	0.126014	0.0416615	0.0666365	0.0280333	-0.0337585	0.0488822	-0.202299	0.329661		-1.10273	-0.296963	0.291595		-2.31933
263	0.126175	0.0423133	0.0665518	0.0287016	-0.034231	0.049486	-0.202932	0.329525		-1.10295	-0.293887	0.293196		-2.29632
264	0.126324	0.0429676	0.0664671	0.0293682	-0.0347125	0.0500908	-0.203558	0.329385		-1.10311	-0.290871	0.294785		-2.31604
265	0.126462	0.0436242	0.0663824	0.0300331	-0.0352031	0.0506962	-0.204176	0.32924		-1.10321	-0.287915	0.296362		-2.23715
266	0.126587	0.0442827	0.0662978	0.0306961	-0.035703	0.051302	-0.204787	0.329092		-1.10326	-0.285023	0.297929		-2.24373
267	0.126699	0.0449429	0.0662133	0.0313574	-0.0362124	0.051908	-0.205389	0.328939		-1.10325	-0.282195	0.299485		-2.3259
268	0.126799	0.0456044	0.0661288	0.0320168	-0.0367315	0.0525139	-0.205984	0.328783		-1.10317	-0.279433	0.301031		-2.2766
269	0.126886	0.0462669	0.0660444	0.0326743	-0.0372603	0.0531194	-0.20657	0.328623		-1.10304	-0.276739	0.302568		-2.25031
270	0.12696	0.0469301	0.0659602	0.0333299	-0.0377991	0.0537242	-0.207148	0.32846		-1.10286	-0.274113	0.304095		-2.28317
271	0.12702	0.0475936	0.0658761	0.0339835	-0.038348	0.054328	-0.207717	0.328294		-1.10261	-0.271557	0.305615		-2.22729
272	0.127067	0.0482572	0.0657922	0.0346352	-0.0389071	0.0549305	-0.208278	0.328124		-1.10231	-0.269072	0.307126		-2.22729
273	0.1271	0.0489205	0.0657085	0.0352849	-0.0394765	0.0555315	-0.208829	0.327951		-1.10196	-0.266659	0.308629		-2.22401
274	0.127119	0.0495832	0.0656251	0.0359325	-0.0400563	0.0561307	-0.209372	0.327776		-1.10154	-0.26432	0.310125		-2.18127
275	0.127124	0.0502451	0.0655419	0.0365781	-0.0406467	0.0567278	-0.209906	0.327598		-1.10107	-0.262054	0.311614		-2.23387
276	0.127114	0.0509057	0.0654591	0.0372217	-0.0412476	0.0573224	-0.21043	0.327417		-1.10055	-0.259862	0.313096		-2.15498
277	0.12709	0.0515649	0.0653766	0.0378631	-0.0418593	0.0579144	-0.210945	0.327234		-1.09997	-0.257746	0.314572		-2.11882
278	0.127051	0.0522222	0.0652946	0.0385024	-0.0424817	0.0585033	-0.21145	0.327049		-1.09933	-0.255705	0.316042		-2.19114
279	0.126998	0.0528774	0.065213	0.0391395	-0.0431149	0.059089	-0.211945	0.326862		-1.09865	-0.25374	0.317506		-2.13854
280	0.126929	0.0535302	0.0651319	0.0397745	-0.043759	0.0596712	-0.21243	0.326673		-1.0979	-0.251851	0.318965		-2.16484
281	0.126846	0.0541803	0.0650513	0.0404072	-0.044414	0.0602496	-0.212905	0.326482		-1.09711	-0.250038	0.320418		-2.201
282	0.126748	0.0548273	0.0649713	0.0410378	-0.0450799	0.0608239	-0.21337	0.32629		-1.09627	-0.248302	0.321866		-2.19114
283	0.126634	0.0554711	0.064892	0.0416661	-0.0457567	0.0613938	-0.213825	0.326096		-1.09537	-0.246642	0.323308		-2.16155
284	0.126505	0.0561113	0.0648134	0.0422921	-0.0464444	0.0619592	-0.214269	0.325901		-1.09442	-0.245059	0.324746		-2.1254
285	0.126361	0.0567477	0.0647355	0.0429158	-0.047143	0.0625197	-0.214702	0.325705		-1.09343	-0.243552	0.326179		-2.13854
286	0.126202	0.0573799	0.0646585	0.0435372	-0.0478524	0.0630751	-0.215124	0.325508		-1.09238	-0.24212	0.327606		-2.16484
287	0.126027	0.0580078	0.0645823	0.0441562	-0.0485726	0.0636253	-0.215536	0.325311		-1.09129	-0.240764	0.329029		-2.05309
288	0.125838	0.058631	0.0645071	0.0447728	-0.0493036	0.0641699	-0.215936	0.325112		-1.09015	-0.239483	0.330447		-2.17799
289	0.125633	0.0592493	0.064433	0.045387	-0.0500452	0.0647087	-0.216325	0.324914		-1.08897	-0.238277	0.33186		-2.08924
290	0.125413	0.0598625	0.0643599	0.0459988	-0.0507975	0.0652417	-0.216703	0.324715		-1.08774	-0.237144	0.333267		-2.07609
291	0.125177	0.0604703	0.0642881	0.046608	-0.0515602	0.0657684	-0.217069	0.324516		-1.08647	-0.236085	0.334669		-2.02678
292	0.124927	0.0610724	0.0642174	0.0472147	-0.0523332	0.0662889	-0.217424	0.324317		-1.08516	-0.235098	0.336066		-2.01364
293	0.124662	0.0616687	0.0641482	0.0478188	-0.0531166	0.0668028	-0.217767	0.324118		-1.08381	-0.234182	0.337457		-2.02022
294	0.124382	0.062259	0.0640803	0.0484203	-0.05391	0.06731	-0.218097	0.32392		-1.08241	-0.233336	0.338842		-2.0235
295	0.124087	0.0628429	0.0640139	0.0490192	-0.0547135	0.0678103	-0.218416	0.323723		-1.08098	-0.232559	0.340221		-1.97091
296	0.123777	0.0634204	0.063949	0.0496154	-0.0555267	0.0683036	-0.218723	0.323526		-1.07951	-0.231851	0.341593		-1.94461
297	0.123453	0.0639912	0.0638858	0.0502089	-0.0563497	0.0687897	-0.219017	0.323331		-1.078	-0.231209	0.342958		-1.92489
298	0.123114	0.064555	0.0638244	0.0507997	-0.057182	0.0692685	-0.219299	0.323136		-1.07646	-0.230633	0.344317		-1.8723
299	0.122761	0.0651118	0.0637647	0.0513877	-0.0580237	0.0697398	-0.219569	0.322943		-1.07488	-0.230121	0.345668		-1.87559
300	0.122393	0.0656613	0.0637068	0.0519729	-0.0588744	0.0702035	-0.219825	0.322752		-1.07328	-0.229671	0.347012		-1.88873
301	0.122012	0.0662034	0.0636509	0.0525553	-0.0597339	0.0706594	-0.22007	0.322563		-1.07164	-0.229283	0.348347		-1.85915
302	0.121617	0.0667378	0.063597	0.053135	-0.0606021	0.0711075	-0.220301	0.322376		-1.06997	-0.228955	0.349675		-1.84929
303	0.121208	0.0672644	0.0635452	0.0537118	-0.0614786	0.0715475	-0.220519	0.322192		-1.06827	-0.228685	0.350993		-1.93147
304	0.120786	0.0677831	0.0634956	0.0542858	-0.0623633	0.0719794	-0.220725	0.322011		-1.06654	-0.228471	0.352302		-1.94132
305	0.12035	0.0682937	0.0634482	0.0548571	-0.0632558	0.0724031	-0.220917	0.321833		-1.06479	-0.228313	0.353602		-1.95776
306	0.119901	0.068796	0.0634031	0.0554256	-0.0641559	0.0728183	-0.221097	0.321658		-1.06302	-0.228208	0.354892		-1.9972
307	0.119439	0.0692899	0.0633604	0.0559913	-0.0650634	0.0732251	-0.221263	0.321488		-1.06122	-0.228155	0.356171		-1.87888
308	0.118965	0.0697753	0.0633202	0.0565543	-0.0659779	0.0736233	-0.221416	0.321321		-1.0594	-0.228152	0.357439		-1.97091
309	0.118478	0.070252	0.0632826	0.0571146	-0.0668992	0.0740128	-0.221556	0.32116		-1.05756	-0.228198	0.358696		-2.01035
310	0.117978	0.0707199	0.0632475	0.0576721	-0.0678269	0.0743934	-0.221682	0.321003		-1.0557	-0.22829	0.35994		-2.03336
311	0.117467	0.0711789	0.0632152	0.058227	-0.0687609	0.0747651	-0.221795	0.320852		-1.05383	-0.228427	0.361172		-2.06294
312	0.116943	0.071629	0.0631856	0.0587791	-0.0697007	0.0751278	-0.221895	0.320706		-1.05194	-0.228607	0.362391		-2.14183
313	0.116408	0.0720699	0.0631589	0.0593287	-0.0706462	0.0754814	-0.221981	0.320567		-1.05004	-0.228828	0.363596		-2.16155
314	0.115861	0.0725016	0.0631351	0.0598756	-0.071597	0.0758257	-0.222053	0.320435		-1.04812	-0.229089	0.364787		-2.07609
315	0.115303	0.072924	0.0631143	0.06042	-0.0725528	0.0761608	-0.222112	0.32031		-1.0462	-0.229388	0.365964		-2.07609
316	0.114734	0.073337	0.0630966	0.0609617	-0.0735133	0.0764864	-0.222158	0.320192		-1.04426	-0.229723	0.367124		-2.18127
317	0.114154	0.0737406	0.063082	0.0615009	-0.0744782	0.0768025	-0.22219	0.320082		-1.04232	-0.230092	0.368269		-2.22401
318	0.113563	0.0741346	0.0630707	0.0620376	-0.0754472	0.0771091	-0.222208	0.31998		-1.04037	-0.230494	0.369398		-2.29632
319	0.112962	0.0745191	0.0630627	0.0625717	-0.0764201	0.0774061	-0.222213	0.319887		-1.03842	-0.230927	0.370509		-2.25687
320	0.11235	0.074894	0.063058	0.0631033	-0.0773965	0.0776934	-0.222204	0.319803		-1.03646	-0.231388	0.371603		-2.29303
321	0.111728	0.0752593	0.0630567	0.0636324	-0.0783761	0.0779709	-0.222181	0.319729		-1.0345	-0.231876	0.372679		-2.29303
322	0.111097	0.0756149	0.063059	0.0641591	-0.0793587	0.0782386	-0.222145	0.319665		-1.03254	-0.23239	0.373737		-2.28317
323	0.110455	0.0759607	0.0630648	0.0646832	-0.0803439	0.0784965	-0.222095	0.319611		-1.03058	-0.232927	0.374775		-2.27988
324	0.109805	0.0762969	0.0630743	0.0652048	-0.0813315	0.0787444	-0.222032	0.319567		-1.02863	-0.233485	0.375795		-2.22401
325	0.109144	0.0766234	0.0630875	0.0657239	-0.0823212	0.0789825	-0.221955	0.319534		-1.02667	-0.234064	0.376795		-2.28317
326	0.108475	0.0769401	0.0631045	0.0662406	-0.0833127	0.0792106	-0.221864	0.319513		-1.02472	-0.234661	0.377775		-2.31933
327	0.107797	0.0772471	0.0631253	0.0667547	-0.0843059	0.0794287	-0.22176	0.319503		-1.02278	-0.235274	0.378735		-2.32262
328	0.10711	0.0775445	0.0631501	0.0672664	-0.0853003	0.0796368	-0.221643	0.319506		-1.02084	-0.235902	0.379675		-2.29632
329	0.106414	0.0778322	0.0631788	0.0677756	-0.0862957	0.079835	-0.221512	0.31952		-1.01891	-0.236543	0.380593		-2.30618
330	0.10571	0.0781104	0.0632117	0.0682822	-0.087292	0.0800231	-0.221367	0.319548		-1.01699	-0.237195	0.381491		-2.33247
331	0.104998	0.078379	0.0632486	0.0687863	-0.0882888	0.0802013	-0.221209	0.319588		-1.01508	-0.237857	0.382368		-2.3522
332	0.104278	0.0786381	0.0632898	0.0692879	-0.0892859	0.0803694	-0.221038	0.319641		-1.01318	-0.238527	0.383224		-2.36205
333	0.103549	0.0788878	0.0633351	0.0697869	-0.090283	0.0805276	-0.220853	0.319707		-1.0113	-0.239203	0.384059		-2.34233
334	0.102813	0.0791282	0.0633848	0.0702834	-0.09128	0.0806759	-0.220655	0.319787		-1.00942	-0.239885	0.384873		-2.38178
335	0.10207	0.0793593	0.0634389	0.0707772	-0.0922765	0.0808143	-0.220443	0.319881		-1.00756	-0.24057	0.385666		-2.34892
336	0.101318	0.0795812	0.0634974	0.0712685	-0.0932723	0.0809428	-0.220218	0.319989		-1.00572	-0.241258	0.386438		-2.26673
337	0.10056	0.0797941	0.0635604	0.0717572	-0.0942673	0.0810616	-0.21998	0.320111		-1.00389	-0.241946	0.387189		-2.30947
338	0.0997945	0.0799981	0.0636279	0.0722433	-0.0952611	0.0811705	-0.219729	0.320248		-1.00208	-0.242634	0.387919		-2.32262
339	0.0990219	0.0801932	0.0636999	0.0727267	-0.0962536	0.0812698	-0.219464	0.320399		-1.00029	-0.24332	0.388628		-2.41794
340	0.0982426	0.0803796	0.0637766	0.0732076	-0.0972445	0.0813594	-0.219186	0.320565		-0.998511	-0.244004	0.389317		-2.34892
341	0.0974565	0.0805575	0.0638579	0.0736858	-0.0982336	0.0814395	-0.218895	0.320746		-0.996755	-0.244684	0.389986		-2.36864
342	0.096664	0.0807269	0.0639438	0.0741614	-0.0992207	0.08151	-0.218592	0.320943		-0.995019	-0.245359	0.390635		-2.41465
343	0.095865	0.080888	0.0640344	0.0746343	-0.100206	0.0815712	-0.218275	0.321154		-0.993302	-0.246029	0.391264		-2.39493
344	0.0950598	0.081041	0.0641298	0.0751047	-0.101188	0.081623	-0.217945	0.321381		-0.991607	-0.246693	0.391873		-2.41465
345	0.0942485	0.081186	0.0642298	0.0755724	-0.102168	0.0816655	-0.217603	0.321623		-0.989933	-0.24735	0.392464		-2.3259
346	0.0934313	0.0813232	0.0643346	0.0760376	-0.103145	0.0816989	-0.217247	0.321881		-0.988281	-0.247999	0.393036		-2.38835
347	0.0926081	0.0814527	0.0644441	0.0765001	-0.104119	0.0817232	-0.21688	0.322154		-0.986652	-0.24864	0.393589		-2.35548
348	0.0917793	0.0815747	0.0645584	0.0769601	-0.10509	0.0817385	-0.216499	0.322443		-0.985045	-0.249273	0.394125		-2.43766
349	0.0909448	0.0816894	0.0646773	0.0774176	-0.106058	0.0817449	-0.216106	0.322748		-0.98346	-0.249897	0.394642		-2.39822
350	0.090105	0.0817968	0.064801	0.0778724	-0.107022	0.0817426	-0.215701	0.323068		-0.981899	-0.250513	0.395143		-2.43766
351	0.0892597	0.0818973	0.0649294	0.0783248	-0.107983	0.0817315	-0.215284	0.323404		-0.980361	-0.251119	0.395627		-2.33247
352	0.0884092	0.0819909	0.0650625	0.0787746	-0.108939	0.0817118	-0.214855	0.323755		-0.978846	-0.251717	0.396095		-2.39822
353	0.0875537	0.0820778	0.0652002	0.0792219	-0.109892	0.0816835	-0.214414	0.324122		-0.977355	-0.252306	0.396548		-2.37849
354	0.0866931	0.0821583	0.0653426	0.0796667	-0.11084	0.0816469	-0.213961	0.324505		-0.975886	-0.252887	0.396985		-2.38506
355	0.0858277	0.0822324	0.0654895	0.0801091	-0.111785	0.0816019	-0.213496	0.324903		-0.974441	-0.253459	0.397407		-2.33576
356	0.0849575	0.0823003	0.065641	0.0805489	-0.112724	0.0815486	-0.21302	0.325316		-0.973019	-0.254025	0.397815		-2.27988
357	0.0840827	0.0823623	0.0657971	0.0809863	-0.113659	0.0814872	-0.212533	0.325745		-0.97162	-0.254583	0.398209		-2.31604
358	0.0832033	0.0824184	0.0659575	0.0814213	-0.11459	0.0814178	-0.212034	0.326189		-0.970243	-0.255135	0.39859		-2.28975
359	0.0823195	0.0824689	0.0661224	0.0818538	-0.115515	0.0813403	-0.211525	0.326647		-0.968889	-0.255682	0.398957		-2.28317
360	0.0814313	0.0825138	0.0662917	0.0822838	-0.116436	0.081255	-0.211005	0.327121		-0.967556	-0.256224	0.399313		-2.22401
361	0.0805389	0.0825535	0.0664652	0.0827115	-0.117351	0.0811618	-0.210474	0.327609		-0.966246	-0.256762	0.399656		-2.22072
362	0.0796424	0.082588	0.066643	0.0831368	-0.118262	0.0810609	-0.209933	0.328112		-0.964957	-0.257297	0.399988		-2.13525
363	0.0787418	0.0826175	0.0668249	0.0835597	-0.119167	0.0809523	-0.209381	0.32863		-0.963689	-0.25783	0.400308		-2.18456
364	0.0778373	0.0826421	0.0670109	0.0839802	-0.120066	0.0808361	-0.20882	0.329162		-0.962441	-0.258362	0.400619		-2.12868
365	0.076929	0.082662	0.067201	0.0843984	-0.12096	0.0807123	-0.208248	0.329708		-0.961214	-0.258894	0.400919		-2.13854
366	0.0760169	0.0826774	0.067395	0.0848143	-0.121848	0.0805811	-0.207667	0.330268		-0.960005	-0.259427	0.401209		-2.05966
367	0.0751013	0.0826884	0.0675929	0.085228	-0.122731	0.0804424	-0.207077	0.330841		-0.958815	-0.259962	0.40149		-1.95119
368	0.0741821	0.082695	0.0677945	0.0856394	-0.123607	0.0802963	-0.206477	0.331428		-0.957644	-0.260501	0.401762		-1.91174
369	0.0732596	0.0826975	0.0679999	0.0860486	-0.124477	0.0801429	-0.205868	0.332029		-0.956489	-0.261043	0.402026		-1.8723
370	0.0723337	0.082696	0.0682088	0.0864556	-0.125342	0.0799822	-0.20525	0.332643		-0.955351	-0.261592	0.402282		-1.82628
371	0.0714048	0.0826906	0.0684213	0.0868605	-0.1262	0.0798142	-0.204624	0.33327		-0.954228	-0.262147	0.402531		-1.90845
372	0.0704727	0.0826813	0.0686372	0.0872634	-0.127051	0.079639	-0.203989	0.33391		-0.953119	-0.262711	0.402773		-1.79341
373	0.0695377	0.0826684	0.0688564	0.0876641	-0.127897	0.0794566	-0.203345	0.334562		-0.952025	-0.263284	0.403009		-1.81313
374	0.0685998	0.0826518	0.0690789	0.0880628	-0.128735	0.079267	-0.202694	0.335226		-0.950943	-0.263867	0.403239		-1.79013
375	0.0676591	0.0826318	0.0693045	0.0884595	-0.129567	0.0790702	-0.202035	0.335903		-0.949874	-0.264461	0.403463		-1.77697
376	0.0667158	0.0826083	0.0695331	0.0888543	-0.130393	0.0788662	-0.201368	0.336591		-0.948815	-0.265069	0.403683		-1.73753
377	0.0657699	0.0825815	0.0697647	0.0892471	-0.131211	0.078655	-0.200693	0.337291		-0.947766	-0.26569	0.403899		-1.69151
378	0.0648216	0.0825514	0.0699991	0.089638	-0.132023	0.0784366	-0.200012	0.338003		-0.946726	-0.266327	0.404111		-1.6948
379	0.0638708	0.0825182	0.0702362	0.090027	-0.132828	0.0782111	-0.199323	0.338725		-0.945695	-0.26698	0.404321		-1.67508
380	0.0629177	0.0824818	0.0704759	0.0904142	-0.133626	0.0779783	-0.198627	0.339458		-0.94467	-0.267651	0.404528		-1.7211
381	0.0619625	0.0824425	0.0707182	0.0907997	-0.134417	0.0777384	-0.197925	0.340202		-0.943652	-0.268341	0.404733		-1.65536
382	0.061005	0.0824001	0.0709629	0.0911833	-0.135201	0.0774913	-0.197216	0.340955		-0.942639	-0.26905	0.404937		-1.6455
383	0.0600455	0.0823549	0.0712099	0.0915653	-0.135977	0.0772369	-0.1965	0.341719		-0.94163	-0.26978	0.40514		-1.58962
384	0.059084	0.0823068	0.0714591	0.0919455	-0.136747	0.0769754	-0.195778	0.342492		-0.940625	-0.270532	0.405343		-1.6455
385	0.0581206	0.0822558	0.0717103	0.0923242	-0.13751	0.0767066	-0.195051	0.343274		-0.939622	-0.271307	0.405547		-1.57647
386	0.0571554	0.0822022	0.0719636	0.0927012	-0.138267	0.0764305	-0.194317	0.344065		-0.93862	-0.272106	0.405753		-1.52716
387	0.0561883	0.0821458	0.0722187	0.0930767	-0.139016	0.0761472	-0.193577	0.344865		-0.937619	-0.272929	0.40596		-1.4943
388	0.0552196	0.0820868	0.0724756	0.0934507	-0.139758	0.0758567	-0.192832	0.345673		-0.936617	-0.273778	0.406169		-1.43185
389	0.0542492	0.0820252	0.0727341	0.0938231	-0.140493	0.0755589	-0.192082	0.346489		-0.935614	-0.274653	0.406381		-1.40555
390	0.0532773	0.0819611	0.0729942	0.0941942	-0.141222	0.0752538	-0.191326	0.347313		-0.93461	-0.275556	0.406597		-1.33324
391	0.0523039	0.0818944	0.0732557	0.0945638	-0.141944	0.0749415	-0.190564	0.348144		-0.933603	-0.276486	0.406818		-1.40226
392	0.0513291	0.0818253	0.0735185	0.0949321	-0.142659	0.074622	-0.189798	0.348981		-0.932593	-0.277445	0.407042		-1.32009
393	0.0503529	0.0817538	0.0737826	0.0952991	-0.143367	0.0742952	-0.189026	0.349826		-0.931579	-0.278433	0.407272		-1.34967
394	0.0493755	0.08168	0.0740477	0.0956648	-0.144069	0.0739612	-0.18825	0.350676		-0.930562	-0.279452	0.407508		-1.31023
395	0.0483969	0.0816038	0.0743138	0.0960293	-0.144765	0.07362	-0.187468	0.351532		-0.929541	-0.280501	0.40775		-1.18861
396	0.0474171	0.0815253	0.0745809	0.0963925	-0.145454	0.0732717	-0.186682	0.352394		-0.928516	-0.281581	0.407999		-1.19518
397	0.0464363	0.0814446	0.0748486	0.0967547	-0.146138	0.0729162	-0.185891	0.353261		-0.927487	-0.282693	0.408255		-1.1656
398	0.0454544	0.0813618	0.0751171	0.0971157	-0.146815	0.0725537	-0.185095	0.354133		-0.926454	-0.283837	0.408519		-1.16231
399	0.0444717	0.0812769	0.0753862	0.0974756	-0.147486	0.0721841	-0.184295	0.355009		-0.925417	-0.285014	0.408791		-1.11629
400	0.043488	0.0811899	0.0756556	0.0978345	-0.148152	0.0718076	-0.18349	0.355889		-0.924376	-0.286223	0.409072		-1.09328
401	0.0425036	0.0811009	0.0759255	0.0981924	-0.148811	0.0714242	-0.182681	0.356774		-0.923333	-0.287466	0.409363		-1.06699
402	0.0415185	0.0810099	0.0761956	0.0985494	-0.149466	0.0710339	-0.181867	0.357661		-0.922287	-0.288741	0.409663		-0.978241
403	0.0405326	0.0809171	0.0764659	0.0989055	-0.150115	0.0706369	-0.181049	0.358552		-0.921239	-0.29005	0.409973		-0.978241
404	0.0395462	0.0808225	0.0767362	0.0992608	-0.150758	0.0702333	-0.180227	0.359445		-0.92019	-0.291392	0.410294		-1.0374
405	0.0385592	0.0807261	0.0770066	0.0996154	-0.151397	0.0698231	-0.1794	0.360341		-0.919141	-0.292767	0.410626		-0.909218
406	0.0375717	0.0806281	0.0772768	0.0999692	-0.152031	0.0694065	-0.178569	0.361239		-0.918093	-0.294175	0.410969		-0.892776
407	0.0365838	0.0805285	0.0775468	0.100322	-0.15266	0.0689836	-0.177733	0.362139		-0.917046	-0.295615	0.411325		-0.807312
408	0.0355956	0.0804273	0.0778166	0.100675	-0.153285	0.0685545	-0.176894	0.363042		-0.916003	-0.297087	0.411693		-0.764587
409	0.0346071	0.0803247	0.0780861	0.101027	-0.153905	0.0681193	-0.17605	0.363945		-0.914965	-0.29859	0.412075		-0.856621
410	0.0336183	0.0802208	0.0783551	0.101379	-0.154521	0.0676781	-0.175202	0.36485		-0.913932	-0.300125	0.412469		-0.817177
411	0.0326295	0.0801155	0.0786237	0.101731	-0.155133	0.0672312	-0.17435	0.365757		-0.912906	-0.30169	0.412878		-0.810608
412	0.0316405	0.0800089	0.0788917	0.102082	-0.155741	0.0667786	-0.173493	0.366664		-0.911888	-0.303285	0.4133		-0.886208
413	0.0306516	0.0799013	0.0791591	0.102434	-0.156346	0.0663206	-0.172633	0.367572		-0.910881	-0.30491	0.413738		-0.810608
414	0.0296628	0.0797925	0.0794259	0.102786	-0.156947	0.0658572	-0.171768	0.368482		-0.909885	-0.306562	0.41419		-0.774452
415	0.0286742	0.0796827	0.079692	0.103137	-0.157544	0.0653886	-0.1709	0.369391		-0.908902	-0.308243	0.414657		-0.748154
416	0.0276858	0.0795719	0.0799574	0.10349	-0.158139	0.0649149	-0.170027	0.370302		-0.907934	-0.30995	0.41514		-0.764587
417	0.0266978	0.0794602	0.080222	0.103842	-0.15873	0.0644365	-0.16915	0.371213		-0.906983	-0.311683	0.415639		-0.682411
418	0.0257103	0.0793478	0.0804858	0.104196	-0.159318	0.0639533	-0.168268	0.372125		-0.906049	-0.313441	0.416153		-0.646255
419	0.0247234	0.0792346	0.0807487	0.10455	-0.159904	0.0634657	-0.167383	0.373037		-0.905136	-0.315223	0.416684		-0.626534
420	0.0237371	0.0791206	0.0810108	0.104905	-0.160487	0.0629737	-0.166493	0.373949		-0.904244	-0.317027	0.417232		-0.642967
421	0.0227516	0.0790061	0.081272	0.105261	-0.161067	0.0624776	-0.165599	0.374862		-0.903376	-0.318854	0.417796		-0.616669
422	0.021767	0.0788911	0.0815323	0.105619	-0.161645	0.0619776	-0.1647	0.375776		-0.902533	-0.320702	0.418377		-0.514774
423	0.0207835	0.0787755	0.0817916	0.105978	-0.16222	0.0614738	-0.163798	0.37669		-0.901718	-0.322569	0.418974		-0.495056
424	0.0198011	0.0786595	0.0820499	0.106338	-0.162794	0.0609665	-0.162891	0.377604		-0.900931	-0.324454	0.419589		-0.4589
425	0.01882	0.0785432	0.0823072	0.106701	-0.163365	0.0604559	-0.16198	0.378518		-0.900175	-0.326357	0.42022		-0.41946
426	0.0178404	0.0784266	0.0825634	0.107065	-0.163934	0.0599421	-0.161064	0.379433		-0.899452	-0.328276	0.420869		-0.426025
427	0.0168624	0.0783097	0.0828185	0.107432	-0.164501	0.0594253	-0.160144	0.380349		-0.898763	-0.330209	0.421534		-0.399738
428	0.0158861	0.0781926	0.0830725	0.107801	-0.165067	0.0589058	-0.15922	0.381264		-0.89811	-0.332155	0.422217		-0.284687
429	0.0149117	0.0780753	0.0833254	0.108172	-0.16563	0.0583836	-0.158292	0.382181		-0.897495	-0.334113	0.422916		-0.314274
430	0.0139393	0.0779579	0.083577	0.108546	-0.166192	0.0578591	-0.157359	0.383097		-0.896919	-0.336081	0.423632		-0.271545
431	0.0129692	0.0778405	0.0838275	0.108922	-0.166752	0.0573324	-0.156422	0.384014		-0.896384	-0.338058	0.424364		-0.232101
432	0.0120015	0.077723	0.0840767	0.109302	-0.167311	0.0568036	-0.155481	0.384932		-0.895891	-0.340042	0.425113		-0.245243
433	0.0110363	0.0776055	0.0843246	0.109685	-0.167868	0.0562731	-0.154536	0.38585		-0.895442	-0.342031	0.425877		-0.212379
434	0.0100739	0.077488	0.0845712	0.110071	-0.168423	0.0557409	-0.153587	0.386768		-0.895038	-0.344024	0.426658		-0.19923
435	0.00911439	0.0773705	0.0848164	0.110461	-0.168976	0.0552073	-0.152633	0.387687		-0.894681	-0.346018	0.427454		-0.205803
436	0.00815797	0.0772531	0.0850604	0.110854	-0.169528	0.0546723	-0.151675	0.388606		-0.894373	-0.348013	0.428266		-0.176216
437	0.00720483	0.0771358	0.0853029	0.111251	-0.170079	0.0541364	-0.150714	0.389526		-0.894113	-0.350007	0.429092		-0.0841866
438	0.00625515	0.0770185	0.085544	0.111652	-0.170628	0.0535995	-0.149748	0.390446		-0.893904	-0.351997	0.429933		-0.192657
439	0.00530912	0.0769014	0.0857838	0.112057	-0.171175	0.0530618	-0.148778	0.391366		-0.893747	-0.353982	0.430789		-0.110477
440	0.00436692	0.0767843	0.0860221	0.112466	-0.171721	0.0525236	-0.147804	0.392287		-0.893643	-0.35596	0.431658		-0.0578918
441	0.00342873	0.0766673	0.0862589	0.11288	-0.172265	0.0519851	-0.146826	0.393209		-0.893593	-0.357929	0.432541		-0.10062
442	0.00249476	0.0765503	0.0864943	0.113298	-0.172808	0.0514463	-0.145845	0.394131		-0.893598	-0.359888	0.433438		-0.0578918
443	0.00156519	0.0764335	0.0867282	0.113721	-0.173349	0.0509074	-0.144859	0.395053		-0.893658	-0.361834	0.434347		-0.0151558
444	0.000640209	0.0763167	0.0869606	0.114148	-0.173888	0.0503686	-0.14387	0.395976		-0.893775	-0.363766	0.43527		-0.0184479
445	-0.000279979	0.0761999	0.0871916	0.114581	-0.174426	0.0498301	-0.142876	0.396899		-0.893949	-0.365682	0.436204		0.0275726
446	-0.00119518	0.0760832	0.087421	0.115018	-0.174963	0.049292	-0.141879	0.397823		-0.894182	-0.367581	0.437151		0.0341492
447	-0.00210518	0.0759666	0.087649	0.115461	-0.175497	0.0487545	-0.140878	0.398747		-0.894473	-0.369459	0.438109		0.0440063
448	-0.00300979	0.0758499	0.0878756	0.115909	-0.17603	0.0482177	-0.139874	0.399672		-0.894824	-0.371315	0.439078		0.188633
449	-0.0039088	0.0757332	0.0881006	0.116362	-0.176562	0.0476818	-0.138866	0.400597		-0.895235	-0.373147	0.440058		0.0867386
450	-0.00480201	0.0756165	0.0883242	0.116821	-0.177091	0.0471469	-0.137854	0.401522		-0.895707	-0.374952	0.441049		0.0998878
451	-0.0056892	0.0754998	0.0885464	0.117285	-0.177619	0.0466132	-0.136838	0.402449		-0.89624	-0.37673	0.44205		0.244514
452	-0.00657019	0.075383	0.0887672	0.117755	-0.178145	0.0460807	-0.135819	0.403375		-0.896834	-0.378477	0.44306		0.145905
453	-0.00744477	0.075266	0.0889867	0.11823	-0.17867	0.0455498	-0.134796	0.404303		-0.89749	-0.380191	0.44408		0.149189
454	-0.00831273	0.075149	0.0892048	0.118712	-0.179193	0.0450204	-0.13377	0.40523		-0.898208	-0.38187	0.445108		0.159054
455	-0.00917388	0.0750317	0.0894216	0.119199	-0.179714	0.0444928	-0.13274	0.406159		-0.898989	-0.383512	0.446145		0.198494
456	-0.010028	0.0749143	0.0896371	0.119692	-0.180233	0.043967	-0.131706	0.407088		-0.899832	-0.385115	0.44719		0.264236
457	-0.0108749	0.0747966	0.0898513	0.120192	-0.18075	0.0434432	-0.13067	0.408018		-0.900739	-0.386676	0.448243		0.198494
458	-0.0117145	0.0746787	0.0900644	0.120697	-0.181266	0.0429216	-0.129629	0.408949		-0.901709	-0.388194	0.449303		0.316826
459	-0.0125464	0.0745606	0.0902764	0.121209	-0.181779	0.0424021	-0.128586	0.40988		-0.902743	-0.389666	0.45037		0.359554
460	-0.0133706	0.0744421	0.0904873	0.121727	-0.182291	0.041885	-0.127539	0.410813		-0.903841	-0.391089	0.451444		0.329975
461	-0.0141868	0.0743233	0.0906971	0.122251	-0.182801	0.0413704	-0.126488	0.411746		-0.905002	-0.392462	0.452523		0.264236
462	-0.0149948	0.0742042	0.090906	0.122782	-0.183309	0.0408584	-0.125435	0.41268		-0.906228	-0.393782	0.453608		0.392426
463	-0.0157945	0.0740847	0.091114	0.123319	-0.183816	0.0403491	-0.124378	0.413615		-0.907518	-0.395047	0.454699		0.323399
464	-0.0165856	0.0739648	0.0913212	0.123863	-0.18432	0.0398427	-0.123318	0.414551		-0.908873	-0.396254	0.455795		0.290531
465	-0.0173681	0.0738446	0.0915276	0.124413	-0.184822	0.0393391	-0.122254	0.415489		-0.910293	-0.397401	0.456895		0.323399
466	-0.0181416	0.0737239	0.0917332	0.124969	-0.185323	0.0388386	-0.121188	0.416427		-0.911777	-0.398486	0.457999		0.30368
467	-0.0189061	0.0736029	0.0919382	0.125532	-0.185821	0.0383413	-0.120118	0.417366		-0.913326	-0.399505	0.459107		0.310253
468	-0.0196614	0.0734815	0.0921426	0.126102	-0.186318	0.0378472	-0.119046	0.418307		-0.91494	-0.400457	0.460219		0.241226
469	-0.0204072	0.0733598	0.0923465	0.126679	-0.186812	0.0373565	-0.117971	0.419249		-0.916619	-0.40134	0.461333		0.25766
470	-0.0211435	0.0732376	0.09255	0.127262	-0.187305	0.0368693	-0.116893	0.420192		-0.918363	-0.40215	0.46245		0.283958
471	-0.0218701	0.0731151	0.092753	0.127852	-0.187795	0.0363857	-0.115812	0.421136		-0.920171	-0.402885	0.463569		0.326691
472	-0.0225868	0.0729923	0.0929557	0.128448	-0.188283	0.0359057	-0.114728	0.422081		-0.922045	-0.403543	0.46469		0.336548
473	-0.0232935	0.0728691	0.0931582	0.129052	-0.188769	0.0354295	-0.113642	0.423028		-0.923982	-0.404122	0.465813		0.277382
474	-0.02399	0.0727457	0.0933605	0.129662	-0.189253	0.0349571	-0.112554	0.423977		-0.925984	-0.404619	0.466936		0.277382
475	-0.0246761	0.072622	0.0935626	0.130278	-0.189735	0.0344887	-0.111463	0.424926		-0.928049	-0.405033	0.46806		0.237938
476	-0.0253519	0.0724981	0.0937647	0.130902	-0.190214	0.0340243	-0.11037	0.425877		-0.930178	-0.40536	0.469184		0.152473
477	-0.0260171	0.072374	0.0939668	0.131532	-0.190692	0.033564	-0.109276	0.426829		-0.93237	-0.405599	0.470307		0.178772
478	-0.0266716	0.0722497	0.094169	0.132169	-0.191167	0.0331078	-0.108179	0.427783		-0.934623	-0.405748	0.471429		0.211639
479	-0.0273153	0.0721254	0.0943714	0.132813	-0.19164	0.0326559	-0.10708	0.428737		-0.936938	-0.405804	0.47255		0.139332
480	-0.0279481	0.0720011	0.094574	0.133463	-0.19211	0.0322083	-0.10598	0.429693		-0.939312	-0.405765	0.473669		0.113033
481	-0.0285699	0.0718769	0.0947769	0.13412	-0.192579	0.0317651	-0.104878	0.430651		-0.941747	-0.40563	0.474786		0.0735931
482	-0.0291806	0.0717528	0.0949802	0.134783	-0.193045	0.0313264	-0.103775	0.431609		-0.944239	-0.405396	0.4759		0.0637283
483	-0.0297802	0.0716289	0.0951839	0.135453	-0.193509	0.0308921	-0.10267	0.432568		-0.946788	-0.405062	0.47701		0.0834503
484	-0.0303685	0.0715054	0.0953881	0.136129	-0.193971	0.0304624	-0.101565	0.433528		-0.949393	-0.404626	0.478117		0.0144272
485	-0.0309454	0.0713822	0.095593	0.136812	-0.19443	0.0300373	-0.100458	0.434489		-0.952053	-0.404085	0.47922		0.0209961
486	-0.031511	0.0712595	0.0957986	0.137501	-0.194887	0.0296169	-0.0993511	0.435451		-0.954765	-0.403438	0.480318		0.00127411
487	-0.0320651	0.0711373	0.0960049	0.138195	-0.195342	0.0292011	-0.0982431	0.436413		-0.957529	-0.402684	0.481411		-0.0414543
488	-0.0326078	0.0710158	0.096212	0.138896	-0.195795	0.02879	-0.0971346	0.437375		-0.960343	-0.401821	0.482498		0.0209961
489	-0.033139	0.070895	0.0964201	0.139602	-0.196246	0.0283837	-0.0960257	0.438338		-0.963207	-0.400848	0.48358		-0.0381699
490	-0.0336587	0.070775	0.0966292	0.140315	-0.196694	0.0279822	-0.0949167	0.439301		-0.966117	-0.399763	0.484656		-0.0250206
491	-0.0341669	0.070656	0.0968393	0.141032	-0.19714	0.0275854	-0.0938076	0.440264		-0.969073	-0.398565	0.485725		-0.0940437
492	-0.0346635	0.0705379	0.0970506	0.141755	-0.197584	0.0271935	-0.0926986	0.441226		-0.972073	-0.397252	0.486787		-0.10062
493	-0.0351487	0.070421	0.0972631	0.142484	-0.198026	0.0268064	-0.09159	0.442188		-0.975117	-0.395824	0.487841		-0.15321
494	-0.0356223	0.0703052	0.0974769	0.143217	-0.198466	0.0264241	-0.0904819	0.443149		-0.978201	-0.39428	0.488888		-0.176216
495	-0.0360846	0.0701908	0.0976921	0.143955	-0.198904	0.0260466	-0.0893745	0.444109		-0.981325	-0.392619	0.489928		-0.0841866
496	-0.0365354	0.0700777	0.0979087	0.144698	-0.19934	0.025674	-0.0882679	0.445068		-0.984487	-0.390839	0.490959		-0.143349
497	-0.0369748	0.069966	0.0981268	0.145445	-0.199774	0.0253062	-0.0871625	0.446025		-0.987686	-0.388941	0.491982		-0.189369
498	-0.037403	0.069856	0.0983465	0.146196	-0.200206	0.0249432	-0.0860583	0.446981		-0.99092	-0.386923	0.492996		-0.163071
499	-0.0378199	0.0697476	0.0985679	0.146952	-0.200636	0.0245851	-0.0849557	0.447934		-0.994187	-0.384785	0.494001		-0.146637
500	-0.0382256	0.0696409	0.0987909	0.147712	-0.201064	0.0242317	-0.0838547	0.448885		-0.997486	-0.382527	0.494997		-0.136772
501	-0.0386202	0.0695361	0.0990158	0.148475	-0.201491	0.0238831	-0.0827556	0.449833		-1.00081	-0.380148	0.495984		-0.192657
502	-0.0390039	0.0694332	0.0992424	0.149241	-0.201915	0.0235392	-0.0816587	0.450779		-1.00417	-0.377647	0.496961		-0.261681
503	-0.0393765	0.0693324	0.099471	0.150011	-0.202338	0.0232001	-0.080564	0.451721		-1.00756	-0.375025	0.497928		-0.317558
504	-0.0397384	0.0692337	0.0997016	0.150784	-0.202759	0.0228658	-0.0794718	0.452659		-1.01097	-0.372281	0.498886		-0.327419
505	-0.0400895	0.0691372	0.0999342	0.15156	-0.203179	0.0225361	-0.0783824	0.453594		-1.0144	-0.369415	0.499834		-0.370152
506	-0.04043	0.0690432	0.100169	0.152338	-0.203596	0.0222111	-0.0772959	0.454525		-1.01785	-0.366428	0.500772		-0.406303
507	-0.04076	0.0689515	0.100406	0.153119	-0.204012	0.0218907	-0.0762125	0.455451		-1.02133	-0.363318	0.5017		-0.357002
508	-0.0410795	0.0688625	0.100645	0.153902	-0.204426	0.021575	-0.0751324	0.456372		-1.02482	-0.360087	0.502618		-0.429317
509	-0.0413887	0.0687761	0.100886	0.154687	-0.204838	0.0212638	-0.0740559	0.457288		-1.02833	-0.356734	0.503526		-0.485195
510	-0.0416877	0.0686925	0.10113	0.155473	-0.205248	0.0209572	-0.0729831	0.458199		-1.03185	-0.35326	0.504424		-0.43589
511	-0.0419765	0.0686119	0.101376	0.156261	-0.205657	0.0206552	-0.0719143	0.459104		-1.03539	-0.349666	0.505312		-0.465473
512	-0.0422553	0.0685343	0.101625	0.15705	-0.206064	0.0203577	-0.0708497	0.460003		-1.03894	-0.345951	0.506189		-0.534496
513	-0.0425242	0.0684599	0.101876	0.15784	-0.206468	0.0200646	-0.0697895	0.460896		-1.04249	-0.342117	0.507057		-0.541077
514	-0.0427833	0.0683888	0.102129	0.15863	-0.206871	0.0197761	-0.0687339	0.461782		-1.04606	-0.338163	0.507915		-0.593662
515	-0.0430327	0.0683211	0.102386	0.159421	-0.207272	0.019492	-0.0676831	0.462661		-1.04963	-0.334092	0.508764		-0.567368
516	-0.0432725	0.068257	0.102644	0.160213	-0.207671	0.0192123	-0.0666374	0.463533		-1.0532	-0.329904	0.509603		-0.619965
517	-0.0435028	0.0681965	0.102906	0.161004	-0.208068	0.018937	-0.0655968	0.464397		-1.05677	-0.325599	0.510433		-0.665977
518	-0.0437238	0.0681398	0.10317	0.161795	-0.208463	0.018666	-0.0645617	0.465254		-1.06034	-0.32118	0.511253		-0.596951
519	-0.0439355	0.0680871	0.103437	0.162585	-0.208856	0.0183994	-0.0635323	0.466102		-1.06391	-0.316647	0.512065		-0.6101
520	-0.044138	0.0680384	0.103707	0.163374	-0.209246	0.018137	-0.0625086	0.466941		-1.06748	-0.312002	0.512868		-0.541077
521	-0.0443315	0.0679939	0.103979	0.164162	-0.209635	0.0178789	-0.061491	0.467772		-1.07104	-0.307246	0.513662		-0.636391
522	-0.0445161	0.0679537	0.104255	0.164949	-0.210021	0.017625	-0.0604796	0.468594		-1.0746	-0.302381	0.514448		-0.626534
523	-0.044692	0.0679179	0.104533	0.165734	-0.210404	0.0173753	-0.0594745	0.469406		-1.07814	-0.297408	0.515225		-0.652832
524	-0.0448591	0.0678867	0.104814	0.166518	-0.210786	0.0171297	-0.058476	0.470208		-1.08167	-0.29233	0.515995		-0.583805
525	-0.0450177	0.0678601	0.105099	0.167299	-0.211164	0.0168881	-0.0574842	0.471		-1.08519	-0.287147	0.516757		-0.642967
526	-0.0451679	0.0678383	0.105386	0.168077	-0.211541	0.0166506	-0.0564993	0.471782		-1.08869	-0.281863	0.51751		-0.735008
527	-0.0453098	0.0678213	0.105676	0.168853	-0.211914	0.016417	-0.0555214	0.472553		-1.09218	-0.276478	0.518257		-0.65612
528	-0.0454435	0.0678094	0.105969	0.169626	-0.212285	0.0161873	-0.0545507	0.473313		-1.09565	-0.270996	0.518996		-0.688988
529	-0.0455691	0.0678025	0.106265	0.170396	-0.212653	0.0159615	-0.0535873	0.474062		-1.09909	-0.265419	0.519728		-0.702133
530	-0.0456868	0.0678007	0.106563	0.171162	-0.213018	0.0157394	-0.0526314	0.4748		-1.10252	-0.259748	0.520452		-0.721855
531	-0.0457967	0.0678043	0.106865	0.171924	-0.213381	0.015521	-0.051683	0.475525		-1.10592	-0.253986	0.52117		-0.774452
532	-0.0458989	0.0678131	0.10717	0.172682	-0.21374	0.0153062	-0.0507424	0.476238		-1.10929	-0.248136	0.521881		-0.70871
533	-0.0459935	0.0678274	0.107477	0.173436	-0.214096	0.0150949	-0.0498097	0.476939		-1.11264	-0.242201	0.522586		-0.705421
534	-0.0460807	0.0678472	0.107787	0.174186	-0.214449	0.0148871	-0.048885	0.477628		-1.11596	-0.236182	0.523284		-0.652832
535	-0.0461605	0.0678725	0.1081	0.17493	-0.214798	0.0146827	-0.0479683	0.478303		-1.11924	-0.230083	0.523975		-0.748154
536	-0.0462331	0.0679034	0.108416	0.175669	-0.215144	0.0144815	-0.0470599	0.478965		-1.1225	-0.223906	0.524661		-0.718575
537	-0.0462987	0.06794	0.108734	0.176403	-0.215487	0.0142835	-0.0461598	0.479614		-1.12572	-0.217654	0.52534		-0.774452
538	-0.0463572	0.0679822	0.109055	0.177132	-0.215826	0.0140886	-0.0452681	0.480249		-1.1289	-0.21133	0.526013		-0.758011
539	-0.0464089	0.0680302	0.109378	0.177855	-0.216161	0.0138965	-0.0443849	0.48087		-1.13205	-0.204938	0.526681		-0.692276
540	-0.0464539	0.0680838	0.109704	0.178571	-0.216493	0.0137073	-0.0435103	0.481476		-1.13515	-0.198479	0.527342		-0.744865
541	-0.0464922	0.0681432	0.110032	0.179282	-0.21682	0.0135207	-0.0426443	0.482069		-1.13822	-0.191959	0.527999		-0.721855
542	-0.0465241	0.0682083	0.110362	0.179986	-0.217144	0.0133367	-0.0417871	0.482647		-1.14124	-0.185379	0.528649		-0.711998
543	-0.0465495	0.0682792	0.110695	0.180683	-0.217463	0.0131551	-0.0409385	0.48321		-1.14422	-0.178744	0.529295		-0.685699
544	-0.0465688	0.0683558	0.111029	0.181374	-0.217778	0.0129758	-0.0400988	0.483758		-1.14716	-0.172056	0.529935		-0.603527
545	-0.0465818	0.068438	0.111366	0.182057	-0.218088	0.0127985	-0.0392679	0.484291		-1.15005	-0.165319	0.53057		-0.577229
546	-0.0465889	0.068526	0.111704	0.182734	-0.218394	0.0126232	-0.0384458	0.484809		-1.15289	-0.158537	0.5312		-0.541077
547	-0.0465901	0.0686195	0.112044	0.183403	-0.218696	0.0124497	-0.0376326	0.485311		-1.15568	-0.151713	0.531825		-0.57394
548	-0.0465855	0.0687187	0.112386	0.184065	-0.218993	0.0122779	-0.0368282	0.485798		-1.15842	-0.144852	0.532444		-0.465473
549	-0.0465753	0.0688234	0.112729	0.184719	-0.219284	0.0121075	-0.0360328	0.486269		-1.16111	-0.137956	0.533059		-0.481911
550	-0.0465595	0.0689336	0.113074	0.185365	-0.219571	0.0119384	-0.0352462	0.486724		-1.16375	-0.13103	0.533669		-0.498344
551	-0.0465384	0.0690492	0.113419	0.186003	-0.219853	0.0117703	-0.0344685	0.487163		-1.16633	-0.124077	0.534274		-0.485195
552	-0.0465119	0.0691701	0.113766	0.186634	-0.220129	0.0116032	-0.0336997	0.487585		-1.16885	-0.117101	0.534873		-0.508209
553	-0.0464803	0.0692963	0.114114	0.187256	-0.2204	0.0114368	-0.0329398	0.487992		-1.17132	-0.110106	0.535468		-0.547646
554	-0.0464436	0.0694276	0.114462	0.18787	-0.220666	0.0112709	-0.0321888	0.488381		-1.17374	-0.103096	0.536056		-0.495056
555	-0.046402	0.0695639	0.114811	0.188475	-0.220926	0.0111053	-0.0314466	0.488755		-1.17609	-0.0960741	0.53664		-0.468761
556	-0.0463555	0.0697052	0.115161	0.189072	-0.221181	0.0109397	-0.0307133	0.489111		-1.17838	-0.0890451	0.537217		-0.544361
557	-0.0463044	0.0698512	0.115511	0.18966	-0.22143	0.010774	-0.0299888	0.489451		-1.18062	-0.0820126	0.537789		-0.485195
558	-0.0462486	0.0700019	0.115861	0.19024	-0.221673	0.010608	-0.0292732	0.489774		-1.18279	-0.0749806	0.538354		-0.481911
559	-0.0461884	0.0701571	0.116211	0.190811	-0.22191	0.0104413	-0.0285663	0.49008		-1.18489	-0.0679531	0.538913		-0.527931
560	-0.0461238	0.0703167	0.11656	0.191373	-0.222141	0.0102738	-0.0278682	0.490368		-1.18694	-0.0609342	0.539464		-0.452324
561	-0.0460549	0.0704805	0.11691	0.191926	-0.222366	0.0101052	-0.0271789	0.49064		-1.18891	-0.0539278	0.540009		-0.468761
562	-0.045982	0.0706483	0.117258	0.19247	-0.222585	0.00993525	-0.0264983	0.490895		-1.19082	-0.0469379	0.540547		-0.481911
563	-0.0459051	0.07082	0.117606	0.193004	-0.222797	0.00976371	-0.0258263	0.491132		-1.19266	-0.0399686	0.541076		-0.468761
564	-0.0458244	0.0709954	0.117953	0.19353	-0.223004	0.00959033	-0.0251629	0.491352		-1.19443	-0.033024	0.541597		-0.567368
565	-0.0457399	0.0711743	0.118299	0.194046	-0.223204	0.00941485	-0.0245082	0.491555		-1.19613	-0.0261081	0.54211		-0.445751
566	-0.0456519	0.0713565	0.118643	0.194554	-0.223398	0.00923699	-0.0238619	0.491741		-1.19776	-0.0192251	0.542613		-0.485195
567	-0.0455605	0.0715418	0.118987	0.195052	-0.223585	0.00905649	-0.0232242	0.49191		-1.19931	-0.0123789	0.543107		-0.426025
568	-0.0454659	0.07173	0.119328	0.19554	-0.223766	0.00887308	-0.0225948	0.492061		-1.20079	-0.00557384	0.543591		-0.4589
569	-0.0453682	0.0719208	0.119668	0.196019	-0.223941	0.00868649	-0.0219738	0.492195		-1.20219	0.00118609	0.544064		-0.508209
570	-0.0452675	0.0721142	0.120005	0.196489	-0.224109	0.00849645	-0.021361	0.492313		-1.20351	0.00789675	0.544527		-0.426025
571	-0.0451641	0.0723098	0.120341	0.19695	-0.224271	0.00830269	-0.0207565	0.492413		-1.20475	0.014554	0.544977		-0.340572
572	-0.0450582	0.0725074	0.120674	0.197401	-0.224426	0.00810493	-0.0201601	0.492496		-1.20591	0.0211539	0.545416		-0.41288
573	-0.0449498	0.0727068	0.121004	0.197842	-0.224575	0.0079029	-0.0195718	0.492563		-1.20699	0.0276921	0.545842		-0.429317
574	-0.0448392	0.0729078	0.121332	0.198275	-0.224717	0.00769634	-0.0189915	0.492612		-1.20798	0.0341648	0.546256		-0.41946
575	-0.0447267	0.0731101	0.121657	0.198697	-0.224854	0.00748498	-0.0184191	0.492645		-1.20889	0.0405677	0.546656		-0.439178
576	-0.0446123	0.0733135	0.121979	0.199111	-0.224983	0.00726854	-0.0178545	0.492662		-1.20971	0.0468969	0.547042		-0.426025
577	-0.0444962	0.0735178	0.122297	0.199514	-0.225107	0.00704677	-0.0172978	0.492662		-1.21044	0.0531483	0.547413		-0.363575
578	-0.0443788	0.0737226	0.122613	0.199909	-0.225224	0.00681941	-0.0167487	0.492647		-1.21108	0.0593179	0.54777		-0.380016
579	-0.0442601	0.0739279	0.122924	0.200294	-0.225336	0.0065862	-0.0162073	0.492615		-1.21162	0.0654016	0.548112		-0.396446
580	-0.0441405	0.0741332	0.123232	0.20067	-0.225441	0.00634689	-0.0156734	0.492568		-1.21208	0.0713956	0.548438		-0.376724
581	-0.04402	0.0743385	0.123536	0.201037	-0.22554	0.00610122	-0.015147	0.492505		-1.21243	0.0772958	0.548747		-0.330708
582	-0.0438989	0.0745433	0.123836	0.201394	-0.225634	0.00584897	-0.0146279	0.492428		-1.21269	0.0830983	0.549041		-0.347137
583	-0.0437774	0.0747476	0.124131	0.201742	-0.225722	0.00558989	-0.014116	0.492335		-1.21285	0.0887995	0.549317		-0.320847
584	-0.0436557	0.074951	0.124423	0.202081	-0.225804	0.00532376	-0.0136114	0.492228		-1.21292	0.0943955	0.549576		-0.333996
585	-0.0435341	0.0751532	0.12471	0.202411	-0.22588	0.00505034	-0.0131138	0.492106		-1.21288	0.0998827	0.549818		-0.327419
586	-0.0434127	0.0753541	0.124992	0.202733	-0.225951	0.00476943	-0.0126232	0.491971		-1.21273	0.105258	0.550042		-0.307701
587	-0.0432916	0.0755533	0.125269	0.203045	-0.226016	0.00448082	-0.0121395	0.491822		-1.21248	0.110517	0.550247		-0.284687
588	-0.0431713	0.0757507	0.125542	0.203349	-0.226077	0.0041843	-0.0116626	0.491659		-1.21213	0.115656	0.550434		-0.271545
589	-0.0430517	0.075946	0.12581	0.203644	-0.226132	0.00387968	-0.0111923	0.491483		-1.21167	0.120674	0.550601		-0.35043
590	-0.0429332	0.0761388	0.126072	0.203931	-0.226182	0.00356677	-0.0107286	0.491295		-1.2111	0.125565	0.55075		-0.281403
591	-0.0428159	0.0763291	0.126329	0.204209	-0.226227	0.00324539	-0.0102714	0.491095		-1.21042	0.130328	0.550878		-0.228813
592	-0.0427	0.0765164	0.126581	0.204479	-0.226267	0.00291535	-0.00982064	0.490882		-1.20962	0.134958	0.550987		-0.258392
593	-0.0425856	0.0767006	0.126828	0.204741	-0.226303	0.00257649	-0.0093761	0.490658		-1.20872	0.139454	0.551076		-0.245243
594	-0.042473	0.0768815	0.127069	0.204995	-0.226334	0.00222865	-0.00893776	0.490423		-1.20771	0.143811	0.551144		-0.15321
595	-0.0423624	0.0770587	0.127304	0.205241	-0.226361	0.00187166	-0.00850549	0.490177		-1.20657	0.148028	0.551192		-0.126915
596	-0.0422538	0.0772321	0.127534	0.20548	-0.226383	0.0015054	-0.0080792	0.48992		-1.20533	0.152101	0.551219		-0.0447426
597	-0.0421475	0.0774014	0.127758	0.205711	-0.226402	0.0011297	-0.0076588	0.489654		-1.20397	0.156028	0.551224		-0.159786
598	-0.0420436	0.0775664	0.127976	0.205934	-0.226416	0.000744436	-0.00724416	0.489378		-1.20249	0.159806	0.551208		-0.140064
599	-0.0419423	0.0777268	0.128188	0.206151	-0.226426	0.000349479	-0.00683519	0.489092		-1.2009	0.163433	0.551171		-0.163071
600	-0.0418438	0.0778824	0.128394	0.206361	-0.226432	-5.52941e-05	-0.00643178	0.488798		-1.19919	0.166906	0.551112		-0.159786
601	-0.0417481	0.078033	0.128595	0.206564	-0.226435	-0.000469997	-0.00603382	0.488495		-1.19736	0.170224	0.551031		-0.189369
602	-0.0416554	0.0781783	0.128789	0.20676	-0.226434	-0.000894739	-0.0056412	0.488185		-1.19542	0.173384	0.550928		-0.186081
603	-0.0415659	0.0783181	0.128977	0.20695	-0.226429	-0.00132962	-0.00525381	0.487867		-1.19336	0.176384	0.550802		-0.172932
604	-0.0414797	0.0784521	0.12916	0.207133	-0.226422	-0.00177474	-0.00487154	0.487541		-1.19118	0.179221	0.550654		-0.149929
605	-0.0413969	0.0785802	0.129336	0.207311	-0.226411	-0.00223017	-0.00449429	0.487209		-1.18888	0.181895	0.550484		-0.130199
606	-0.0413176	0.0787022	0.129506	0.207483	-0.226396	-0.00269601	-0.00412195	0.48687		-1.18646	0.184403	0.550292		-0.120342
607	-0.041242	0.0788177	0.12967	0.207649	-0.226379	-0.00317231	-0.00375442	0.486526		-1.18393	0.186743	0.550076		0.00785065
608	-0.0411701	0.0789267	0.129828	0.20781	-0.226359	-0.00365916	-0.00339161	0.486176		-1.18128	0.188915	0.549838		-0.0710373
609	-0.0411021	0.0790288	0.12998	0.207966	-0.226336	-0.00415659	-0.00303342	0.485821		-1.17852	0.190916	0.549578		-0.0447426
610	-0.0410381	0.0791238	0.130126	0.208117	-0.226311	-0.00466466	-0.00267977	0.485461		-1.17564	0.192746	0.549295		-0.0118713
611	-0.040978	0.0792117	0.130266	0.208264	-0.226283	-0.00518341	-0.00233057	0.485096		-1.17265	0.194402	0.54899		0.0308571
612	-0.0409221	0.079292	0.1304	0.208405	-0.226252	-0.00571287	-0.00198573	0.484728		-1.16954	0.195885	0.548662		0.0242882
613	-0.0408703	0.0793648	0.130528	0.208543	-0.22622	-0.00625308	-0.00164517	0.484357		-1.16632	0.197192	0.548312		-0.0118713
614	-0.0408228	0.0794297	0.13065	0.208676	-0.226185	-0.00680404	-0.00130881	0.483982		-1.163	0.198324	0.547939		0.00785065
615	-0.0407795	0.0794866	0.130767	0.208806	-0.226148	-0.00736577	-0.000976547	0.483604		-1.15956	0.19928	0.547545		0.0440063
616	-0.0407405	0.0795353	0.130878	0.208932	-0.226108	-0.00793827	-0.000648313	0.483225		-1.15601	0.200059	0.547128		0.0440063
617	-0.0407059	0.0795756	0.130983	0.209054	-0.226067	-0.00852152	-0.000324024	0.482843		-1.15236	0.200661	0.54669		0.0801659
618	-0.0406757	0.0796074	0.131082	0.209173	-0.226024	-0.0091155	-3.601e-06	0.482459		-1.1486	0.201086	0.54623		0.0242882
619	-0.0406499	0.0796304	0.131176	0.20929	-0.225979	-0.0097202	0.000313033	0.482075		-1.14473	0.201334	0.545748		0.0111389
620	-0.0406285	0.0796447	0.131265	0.209404	-0.225933	-0.0103356	0.00062595	0.48169		-1.14077	0.201405	0.545245		-0.00858307
621	-0.0406114	0.0796499	0.131348	0.209515	-0.225885	-0.0109616	0.000935219	0.481304		-1.1367	0.2013	0.544721		0.0177078
622	-0.0405988	0.079646	0.131426	0.209624	-0.225835	-0.0115982	0.0012409	0.480918		-1.13254	0.20102	0.544175		-0.00858307
623	-0.0405906	0.0796328	0.131498	0.209731	-0.225784	-0.0122453	0.00154306	0.480533		-1.12828	0.200564	0.543608		0.0407181
624	-0.0405868	0.0796102	0.131566	0.209836	-0.225732	-0.0129029	0.00184175	0.480149		-1.12392	0.199933	0.54302		-0.0283051
625	-0.0405873	0.0795781	0.131629	0.20994	-0.225678	-0.0135709	0.00213702	0.479765		-1.11948	0.199129	0.542411		0.0111389
626	-0.0405922	0.0795364	0.131687	0.210042	-0.225623	-0.0142491	0.00242892	0.479383		-1.11494	0.198153	0.541781		-0.0545998
627	-0.0406013	0.0794849	0.13174	0.210144	-0.225566	-0.0149377	0.00271751	0.479003		-1.11032	0.197004	0.541131		-0.0743217
628	-0.0406147	0.0794235	0.131789	0.210244	-0.225509	-0.0156363	0.00300283	0.478625		-1.10561	0.195686	0.540459		-0.10062
629	-0.0406323	0.0793522	0.131833	0.210344	-0.22545	-0.016345	0.00328495	0.478249		-1.10082	0.194198	0.539767		-0.0283051
630	-0.040654	0.0792708	0.131873	0.210443	-0.225391	-0.0170636	0.0035639	0.477877		-1.09594	0.192543	0.539054		0.0440063
631	-0.0406798	0.0791792	0.131908	0.210542	-0.22533	-0.0177921	0.00383974	0.477508		-1.091	0.190721	0.538321		0.00785065
632	-0.0407096	0.0790774	0.13194	0.210641	-0.225269	-0.0185302	0.00411248	0.477142		-1.08597	0.188735	0.537567		-0.0545998
633	-0.0407433	0.0789653	0.131967	0.210741	-0.225206	-0.019278	0.00438218	0.47678		-1.08088	0.186586	0.536792		-0.0217323
634	-0.0407809	0.0788427	0.131991	0.21084	-0.225143	-0.0200352	0.00464884	0.476422		-1.07572	0.184276	0.535997		-0.0283051
635	-0.0408223	0.0787097	0.132011	0.21094	-0.225078	-0.0208017	0.0049125	0.476069		-1.07049	0.181807	0.535181		-0.00201416
636	-0.0408674	0.0785662	0.132027	0.211041	-0.225013	-0.0215775	0.00517317	0.475721		-1.0652	0.17918	0.534345		-0.0644646
637	-0.0409161	0.078412	0.13204	0.211143	-0.224947	-0.0223624	0.00543087	0.475378		-1.05985	0.176399	0.533488		-0.0052948
638	-0.0409683	0.0782471	0.13205	0.211246	-0.224881	-0.0231563	0.00568561	0.47504		-1.05445	0.173465	0.532611		-0.0447426
639	-0.041024	0.0780715	0.132057	0.21135	-0.224813	-0.023959	0.0059374	0.474708		-1.04899	0.170381	0.531712		-0.103909
640	-0.041083	0.0778851	0.132061	0.211455	-0.224745	-0.0247705	0.00618623	0.474382		-1.04349	0.16715	0.530794		-0.11705
641	-0.0411452	0.0776878	0.132062	0.211562	-0.224676	-0.0255905	0.0064321	0.474063		-1.03793	0.163773	0.529854		-0.149929
642	-0.0412106	0.0774796	0.13206	0.211671	-0.224606	-0.0264191	0.00667501	0.47375		-1.03234	0.160255	0.528894		-0.163071
643	-0.0412789	0.0772605	0.132056	0.211781	-0.224536	-0.0272559	0.00691493	0.473444		-1.02671	0.156598	0.527914		-0.179508
644	-0.0413502	0.0770304	0.132049	0.211894	-0.224465	-0.028101	0.00715187	0.473145		-1.02104	0.152806	0.526912		-0.176216
645	-0.0414243	0.0767892	0.13204	0.212009	-0.224393	-0.0289542	0.00738579	0.472853		-1.01534	0.14888	0.52589		-0.248535
646	-0.0415011	0.076537	0.132029	0.212126	-0.224321	-0.0298153	0.00761667	0.472569		-1.00961	0.144826	0.524848		-0.228813
647	-0.0415805	0.0762738	0.132016	0.212245	-0.224248	-0.0306842	0.00784449	0.472293		-1.00385	0.140646	0.523784		-0.176216
648	-0.0416623	0.0759994	0.132002	0.212367	-0.224174	-0.0315608	0.00806923	0.472025		-0.99807	0.136343	0.5227		-0.232101
649	-0.0417464	0.075714	0.131985	0.212491	-0.2241	-0.032445	0.00829085	0.471766		-0.992271	0.131922	0.521595		-0.222237
650	-0.0418327	0.0754175	0.131968	0.212618	-0.224025	-0.0333365	0.00850932	0.471515		-0.986456	0.127387	0.520469		-0.320847
651	-0.0419211	0.0751099	0.131949	0.212748	-0.223949	-0.0342353	0.00872462	0.471273		-0.980629	0.12274	0.519323		-0.287979
652	-0.0420114	0.0747912	0.131929	0.212881	-0.223872	-0.0351412	0.00893671	0.47104		-0.974791	0.117987	0.518155		-0.294552
653	-0.0421034	0.0744614	0.131907	0.213017	-0.223795	-0.0360541	0.00914555	0.470816		-0.968946	0.113132	0.516967		-0.228813
654	-0.0421972	0.0741207	0.131885	0.213156	-0.223716	-0.0369739	0.00935109	0.470602		-0.963098	0.108177	0.515758		-0.370152
655	-0.0422924	0.0737689	0.131863	0.213298	-0.223637	-0.0379002	0.0095533	0.470398		-0.957249	0.103129	0.514529		-0.353718
656	-0.042389	0.0734062	0.131839	0.213443	-0.223558	-0.0388332	0.00975213	0.470203		-0.951402	0.0979908	0.513278		-0.409595
657	-0.0424868	0.0730325	0.131816	0.213592	-0.223477	-0.0397724	0.00994751	0.470018		-0.94556	0.0927672	0.512007		-0.439178
658	-0.0425858	0.072648	0.131792	0.213743	-0.223395	-0.0407179	0.0101394	0.469844		-0.939726	0.0874625	0.510714		-0.518066
659	-0.0426856	0.0722527	0.131768	0.213899	-0.223312	-0.0416695	0.0103277	0.469679		-0.933902	0.0820815	0.509401		-0.468761
660	-0.0427863	0.0718466	0.131744	0.214057	-0.223229	-0.042627	0.0105124	0.469526		-0.928093	0.0766286	0.508068		-0.616669
661	-0.0428876	0.0714298	0.13172	0.214219	-0.223144	-0.0435902	0.0106935	0.469383		-0.922299	0.0711084	0.506713		-0.652832
662	-0.0429895	0.0710025	0.131696	0.214384	-0.223059	-0.0445591	0.0108708	0.46925		-0.916525	0.0655257	0.505338		-0.577229
663	-0.0430917	0.0705645	0.131673	0.214552	-0.222972	-0.0455333	0.0110442	0.469129		-0.910772	0.0598849	0.503942		-0.58709
664	-0.0431942	0.0701162	0.13165	0.214724	-0.222884	-0.0465129	0.0112138	0.469018		-0.905043	0.054191	0.502525		-0.636391
665	-0.0432967	0.0696574	0.131627	0.214899	-0.222795	-0.0474976	0.0113795	0.468918		-0.899341	0.0484484	0.501087		-0.6101
666	-0.0433991	0.0691884	0.131606	0.215077	-0.222705	-0.0484872	0.0115411	0.46883		-0.893667	0.042662	0.499629		-0.619965
667	-0.0435013	0.0687092	0.131585	0.215258	-0.222614	-0.0494816	0.0116986	0.468752		-0.888025	0.0368364	0.49815		-0.600239
668	-0.0436032	0.06822	0.131565	0.215443	-0.222521	-0.0504806	0.011852	0.468686		-0.882415	0.0309765	0.49665		-0.659409
669	-0.0437045	0.0677209	0.131546	0.21563	-0.222428	-0.0514841	0.0120011	0.468631		-0.876841	0.025087	0.495129		-0.682411
670	-0.0438052	0.0672119	0.131527	0.215821	-0.222332	-0.052492	0.012146	0.468588		-0.871304	0.0191726	0.493588		-0.685699
671	-0.0439051	0.0666932	0.13151	0.216014	-0.222236	-0.0535039	0.0122864	0.468555		-0.865805	0.013238	0.492025		-0.659409
672	-0.044004	0.066165	0.131495	0.21621	-0.222138	-0.0545198	0.0124224	0.468534		-0.860347	0.00728799	0.490442		-0.728432
673	-0.0441017	0.0656272	0.13148	0.216409	-0.222038	-0.0555396	0.0125539	0.468525		-0.854931	0.00132718	0.488838		-0.728432
674	-0.0441982	0.0650802	0.131467	0.21661	-0.221937	-0.056563	0.0126808	0.468526		-0.849558	-0.00463977	0.487213		-0.774452
675	-0.0442932	0.064524	0.131455	0.216814	-0.221834	-0.0575899	0.0128031	0.468539		-0.844229	-0.0106083	0.485566		-0.784309
676	-0.0443867	0.0639588	0.131444	0.21702	-0.221729	-0.0586201	0.0129206	0.468563		-0.838945	-0.0165737	0.483898		-0.767868
677	-0.0444783	0.0633847	0.131435	0.217228	-0.221622	-0.0596535	0.0130334	0.468598		-0.833708	-0.0225317	0.482208		-0.735008
678	-0.0445681	0.0628019	0.131427	0.217438	-0.221514	-0.0606898	0.0131414	0.468645		-0.828517	-0.0284778	0.480497		-0.781029
679	-0.0446558	0.0622105	0.131421	0.21765	-0.221403	-0.061729	0.0132445	0.468702		-0.823375	-0.0344076	0.478763		-0.78759
680	-0.0447412	0.0616108	0.131417	0.217865	-0.221291	-0.0627708	0.0133428	0.46877		-0.818281	-0.0403169	0.477008		-0.764587
681	-0.0448243	0.0610028	0.131414	0.218081	-0.221176	-0.0638149	0.0134361	0.46885		-0.813235	-0.0462014	0.47523		-0.725143
682	-0.0449048	0.0603867	0.131413	0.218298	-0.221059	-0.0648614	0.0135246	0.46894		-0.808239	-0.0520571	0.47343		-0.78759
683	-0.0449826	0.0597628	0.131414	0.218517	-0.22094	-0.0659099	0.013608	0.469041		-0.803292	-0.05788	0.471607		-0.83033
684	-0.0450576	0.0591312	0.131417	0.218738	-0.220818	-0.0669602	0.0136865	0.469153		-0.798396	-0.0636661	0.469762		-0.771164
685	-0.0451297	0.058492	0.131421	0.218959	-0.220694	-0.0680122	0.0137601	0.469275		-0.793549	-0.0694118	0.467894		-0.833611
686	-0.0451986	0.0578455	0.131428	0.219182	-0.220568	-0.0690657	0.0138286	0.469408		-0.788752	-0.0751133	0.466003		-0.797455
687	-0.0452643	0.0571919	0.131437	0.219406	-0.220438	-0.0701206	0.0138922	0.469552		-0.784005	-0.0807673	0.464089		-0.797455
688	-0.0453266	0.0565312	0.131447	0.219631	-0.220306	-0.0711765	0.0139508	0.469706		-0.779307	-0.0863704	0.462152		-0.843475
689	-0.0453854	0.0558637	0.13146	0.219857	-0.220171	-0.0722334	0.0140045	0.469871		-0.77466	-0.0919193	0.460191		-0.794174
690	-0.0454406	0.0551896	0.131475	0.220084	-0.220033	-0.073291	0.0140532	0.470045		-0.770062	-0.097411	0.458208		-0.863197
691	-0.0454921	0.0545091	0.131492	0.220311	-0.219893	-0.0743492	0.014097	0.470231		-0.765513	-0.102843	0.456201		-0.951942
692	-0.0455398	0.0538223	0.131512	0.220539	-0.219749	-0.0754077	0.014136	0.470426		-0.761012	-0.108211	0.454171		-1.00454
693	-0.0455836	0.0531294	0.131534	0.220766	-0.219602	-0.0764664	0.0141702	0.470631		-0.756561	-0.113514	0.452117		-0.902641
694	-0.0456233	0.0524307	0.131558	0.220995	-0.219451	-0.0775251	0.0141996	0.470846		-0.752157	-0.118749	0.450041		-0.971672
695	-0.045659	0.0517262	0.131585	0.221223	-0.219298	-0.0785835	0.0142243	0.471071		-0.747801	-0.123913	0.447941		-0.994675
696	-0.0456904	0.0510163	0.131614	0.221451	-0.21914	-0.0796416	0.0142444	0.471306		-0.743493	-0.129004	0.445818		-0.997963
697	-0.0457176	0.050301	0.131645	0.22168	-0.21898	-0.080699	0.0142599	0.47155		-0.739231	-0.134021	0.443673		-1.05712
698	-0.0457405	0.0495806	0.131679	0.221907	-0.218815	-0.0817556	0.0142709	0.471804		-0.735015	-0.138961	0.441504		-1.05712
699	-0.045759	0.0488552	0.131716	0.222135	-0.218647	-0.0828111	0.0142775	0.472066		-0.730846	-0.143822	0.439313		-0.974953
700	-0.045773	0.0481251	0.131755	0.222362	-0.218476	-0.0838654	0.0142797	0.472338		-0.726721	-0.148604	0.437099		-1.07028
701	-0.0457826	0.0473905	0.131797	0.222588	-0.2183	-0.0849182	0.0142778	0.472618		-0.722641	-0.153303	0.434863		-1.12286
702	-0.0457876	0.0466516	0.131841	0.222814	-0.21812	-0.0859693	0.0142717	0.472908		-0.718605	-0.157919	0.432605		-1.09986
703	-0.045788	0.0459086	0.131888	0.223039	-0.217937	-0.0870185	0.0142615	0.473205		-0.714613	-0.16245	0.430325		-1.09
704	-0.0457839	0.0451618	0.131938	0.223262	-0.217749	-0.0880654	0.0142474	0.473511		-0.710663	-0.166896	0.428023		-1.06371
705	-0.0457751	0.0444114	0.131991	0.223485	-0.217557	-0.0891099	0.0142294	0.473825		-0.706757	-0.171254	0.425699		-1.10973
706	-0.0457616	0.0436576	0.132046	0.223706	-0.217361	-0.0901517	0.0142077	0.474146		-0.702892	-0.175525	0.423355		-1.09328
707	-0.0457435	0.0429008	0.132104	0.223925	-0.21716	-0.0911905	0.0141824	0.474475		-0.69907	-0.179707	0.42099		-1.16231
708	-0.0457207	0.0421411	0.132164	0.224143	-0.216956	-0.0922261	0.0141536	0.474811		-0.695289	-0.1838	0.418605		-1.15903
709	-0.0456932	0.0413789	0.132227	0.224359	-0.216746	-0.0932581	0.0141214	0.475154		-0.691549	-0.187802	0.416199		-1.06371
710	-0.045661	0.0406144	0.132293	0.224574	-0.216532	-0.0942864	0.014086	0.475503		-0.68785	-0.191714	0.413775		-1.07028
711	-0.0456241	0.0398479	0.132361	0.224786	-0.216314	-0.0953106	0.0140474	0.475859		-0.684193	-0.195536	0.411331		-1.05712
712	-0.0455826	0.0390796	0.132432	0.224996	-0.21609	-0.0963304	0.0140059	0.476221		-0.680576	-0.199266	0.408869		-1.10973
713	-0.0455365	0.03831	0.132506	0.225203	-0.215862	-0.0973456	0.0139615	0.476588		-0.677	-0.202905	0.40639		-1.17875
714	-0.0454857	0.0375392	0.132582	0.225408	-0.21563	-0.0983559	0.0139144	0.47696		-0.673464	-0.206454	0.403893		-1.14916
715	-0.0454304	0.0367675	0.132661	0.225611	-0.215392	-0.099361	0.0138647	0.477338		-0.669969	-0.209911	0.401379		-1.18861
716	-0.0453705	0.0359953	0.132742	0.22581	-0.215149	-0.10036	0.0138126	0.477719		-0.666515	-0.213278	0.39885		-1.22477
717	-0.0453061	0.0352229	0.132825	0.226007	-0.214902	-0.101354	0.0137582	0.478105		-0.663102	-0.216555	0.396306		-1.20833
718	-0.0452373	0.0344505	0.132911	0.2262	-0.214649	-0.102342	0.0137017	0.478495		-0.65973	-0.219743	0.393748		-1.25435
719	-0.0451641	0.0336786	0.132999	0.22639	-0.214391	-0.103323	0.0136432	0.478888		-0.656399	-0.222842	0.391177		-1.30694
720	-0.0450866	0.0329073	0.133089	0.226577	-0.214128	-0.104297	0.0135828	0.479284		-0.653109	-0.225852	0.388593		-1.30365
721	-0.0450049	0.032137	0.133181	0.22676	-0.21386	-0.105264	0.0135208	0.479683		-0.64986	-0.228776	0.385998		-1.31023
722	-0.0449191	0.0313681	0.133275	0.226939	-0.213587	-0.106224	0.0134572	0.480084		-0.646653	-0.231615	0.383392		-1.30694
723	-0.0448292	0.0306009	0.133371	0.227113	-0.213308	-0.107176	0.0133923	0.480486		-0.643487	-0.234368	0.380777		-1.25435
724	-0.0447353	0.0298357	0.133469	0.227284	-0.213025	-0.10812	0.0133261	0.48089		-0.640364	-0.237038	0.378154		-1.29707
725	-0.0446376	0.0290729	0.133569	0.227451	-0.212736	-0.109055	0.0132589	0.481295		-0.637283	-0.239627	0.375523		-1.30037
726	-0.0445361	0.0283127	0.13367	0.227612	-0.212442	-0.109982	0.0131907	0.4817		-0.634244	-0.242135	0.372886		-1.27735
727	-0.0444309	0.0275556	0.133773	0.22777	-0.212142	-0.110899	0.0131218	0.482105		-0.631248	-0.244564	0.370245		-1.35954
728	-0.0443222	0.0268019	0.133878	0.227922	-0.211838	-0.111807	0.0130522	0.48251		-0.628295	-0.246916	0.3676		-1.31351
729	-0.04421	0.026052	0.133983	0.22807	-0.211528	-0.112705	0.0129821	0.482914		-0.625385	-0.249193	0.364952		-1.29707
730	-0.0440945	0.0253061	0.13409	0.228212	-0.211212	-0.113593	0.0129117	0.483316		-0.622519	-0.251396	0.362303		-1.38583
731	-0.0439758	0.0245647	0.134198	0.22835	-0.210892	-0.114469	0.0128412	0.483717		-0.619696	-0.253528	0.359654		-1.37926
732	-0.0438541	0.0238281	0.134308	0.228481	-0.210566	-0.115335	0.0127705	0.484116		-0.616917	-0.255591	0.357006		-1.30694
733	-0.0437293	0.0230966	0.134418	0.228608	-0.210235	-0.11619	0.0127	0.484513		-0.614182	-0.257586	0.35436		-1.3924
734	-0.0436018	0.0223706	0.134528	0.228729	-0.209899	-0.117032	0.0126298	0.484906		-0.611491	-0.259515	0.351718		-1.32666
735	-0.0434716	0.0216505	0.13464	0.228844	-0.209558	-0.117863	0.0125599	0.485297		-0.608844	-0.261381	0.349081		-1.32666
736	-0.0433388	0.0209365	0.134752	0.228954	-0.209211	-0.118681	0.0124906	0.485683		-0.606241	-0.263187	0.346449		-1.32009
737	-0.0432036	0.020229	0.134864	0.229058	-0.20886	-0.119486	0.012422	0.486066		-0.603683	-0.264934	0.343824		-1.32009
738	-0.0430662	0.0195284	0.134976	0.229156	-0.208503	-0.120277	0.0123543	0.486445		-0.601168	-0.266624	0.341208		-1.33981
739	-0.0429267	0.018835	0.135089	0.229247	-0.208142	-0.121055	0.0122876	0.486819		-0.598698	-0.268261	0.338601		-1.34638
740	-0.0427853	0.0181491	0.135202	0.229333	-0.207776	-0.121819	0.012222	0.487187		-0.596272	-0.269847	0.336004		-1.3924
741	-0.042642	0.017471	0.135314	0.229413	-0.207405	-0.122568	0.0121577	0.487551		-0.593889	-0.271383	0.333419		-1.32337
742	-0.0424972	0.0168011	0.135427	0.229486	-0.207029	-0.123303	0.0120948	0.487909		-0.59155	-0.272873	0.330846		-1.32009
743	-0.0423509	0.0161396	0.135539	0.229553	-0.206649	-0.124022	0.0120335	0.488261		-0.589254	-0.274319	0.328286		-1.35624
744	-0.0422033	0.0154869	0.13565	0.229614	-0.206264	-0.124726	0.011974	0.488606		-0.587001	-0.275723	0.325741		-1.33324
745	-0.0420546	0.0148432	0.135761	0.229668	-0.205874	-0.125414	0.0119163	0.488946		-0.58479	-0.277089	0.323212		-1.28393
746	-0.0419049	0.0142089	0.135871	0.229717	-0.20548	-0.126086	0.0118606	0.489278		-0.582622	-0.278417	0.320699		-1.29707
747	-0.0417544	0.0135843	0.135981	0.229758	-0.205082	-0.126741	0.011807	0.489604		-0.580494	-0.279712	0.318203		-1.33324
748	-0.0416033	0.0129697	0.136089	0.229793	-0.20468	-0.127379	0.0117557	0.489922		-0.578408	-0.280975	0.315725		-1.35954
749	-0.0414517	0.0123653	0.136196	0.229822	-0.204273	-0.128	0.0117069	0.490233		-0.576362	-0.282208	0.313266		-1.46471
750	-0.0412998	0.0117714	0.136302	0.229844	-0.203863	-0.128603	0.0116607	0.490536		-0.574356	-0.283415	0.310826		-1.44828
751	-0.0411477	0.0111883	0.136407	0.229859	-0.203448	-0.129189	0.0116172	0.490831		-0.572389	-0.284597	0.308407		-1.42527
752	-0.0409956	0.0106163	0.13651	0.229867	-0.20303	-0.129756	0.0115766	0.491119		-0.57046	-0.285756	0.30601		-1.43185
753	-0.0408436	0.0100556	0.136612	0.229869	-0.202608	-0.130304	0.011539	0.491398		-0.568569	-0.286896	0.303634		-1.35954
754	-0.0406919	0.00950653	0.136713	0.229865	-0.202181	-0.130834	0.0115047	0.491669		-0.566715	-0.288018	0.301281		-1.41212
755	-0.0405406	0.00896929	0.136812	0.229853	-0.201752	-0.131345	0.0114738	0.491931		-0.564897	-0.289126	0.298951		-1.45814
756	-0.0403898	0.00844416	0.136909	0.229835	-0.201318	-0.131836	0.0114465	0.492184		-0.563115	-0.29022	0.296644		-1.4417
757	-0.0402397	0.00793137	0.137004	0.22981	-0.200882	-0.132308	0.0114229	0.492429		-0.561369	-0.291304	0.294362		-1.45814
758	-0.0400903	0.00743117	0.137097	0.229778	-0.200441	-0.132759	0.0114033	0.492665		-0.559657	-0.29238	0.292106		-1.40555
759	-0.0399417	0.00694379	0.137189	0.229739	-0.199997	-0.133191	0.0113878	0.492892		-0.557979	-0.293449	0.289874		-1.42527
760	-0.0397942	0.00646946	0.137278	0.229694	-0.19955	-0.133602	0.0113765	0.49311		-0.556334	-0.294515	0.287669		-1.41869
761	-0.0396476	0.0060084	0.137366	0.229642	-0.1991	-0.133992	0.0113698	0.493319		-0.554722	-0.295579	0.285491		-1.43842
762	-0.0395023	0.00556084	0.137452	0.229583	-0.198646	-0.134362	0.0113676	0.493519		-0.553141	-0.296642	0.283339		-1.3924
763	-0.0393582	0.005127	0.137535	0.229517	-0.198189	-0.13471	0.0113703	0.49371		-0.551592	-0.297709	0.281216		-1.33324
764	-0.0392154	0.00470708	0.137617	0.229445	-0.197729	-0.135038	0.011378	0.493892		-0.550073	-0.298779	0.27912		-1.35295
765	-0.039074	0.00430129	0.137696	0.229366	-0.197266	-0.135344	0.0113908	0.494064		-0.548584	-0.299855	0.277053		-1.33652
766	-0.0389342	0.00390984	0.137773	0.22928	-0.1968	-0.135628	0.0114089	0.494228		-0.547124	-0.300939	0.275016		-1.35624
767	-0.0387958	0.00353293	0.137848	0.229188	-0.19633	-0.13589	0.0114324	0.494383		-0.545692	-0.302033	0.273008		-1.34967
768	-0.0386591	0.00317075	0.13792	0.22909	-0.195859	-0.136131	0.0114614	0.494529		-0.544288	-0.303138	0.27103		-1.35624
769	-0.0385241	0.00282349	0.13799	0.228986	-0.195384	-0.136349	0.0114962	0.494666		-0.542911	-0.304255	0.269082		-1.29379
770	-0.0383908	0.00249135	0.138059	0.228875	-0.194906	-0.136546	0.0115368	0.494795		-0.54156	-0.305386	0.267165		-1.25106
771	-0.0382594	0.00217449	0.138124	0.228758	-0.194426	-0.13672	0.0115834	0.494915		-0.540235	-0.306533	0.26528		-1.30365
772	-0.0381297	0.0018731	0.138188	0.228636	-0.193943	-0.136872	0.011636	0.495027		-0.538935	-0.307696	0.263427		-1.32337
773	-0.038002	0.00158734	0.138249	0.228507	-0.193458	-0.137001	0.0116948	0.495131		-0.53766	-0.308877	0.261605		-1.32009
774	-0.0378761	0.00131738	0.138307	0.228373	-0.19297	-0.137108	0.0117598	0.495227		-0.536408	-0.310076	0.259816		-1.32009
775	-0.0377523	0.00106338	0.138364	0.228233	-0.19248	-0.137192	0.0118313	0.495315		-0.535181	-0.311295	0.25806		-1.29379
776	-0.0376305	0.000825485	0.138418	0.228088	-0.191987	-0.137254	0.0119092	0.495396		-0.533976	-0.312534	0.256337		-1.30694
777	-0.0375107	0.000603849	0.13847	0.227938	-0.191492	-0.137293	0.0119936	0.495469		-0.532795	-0.313794	0.254648		-1.32009
778	-0.0373931	0.000398611	0.138519	0.227783	-0.190995	-0.137309	0.0120847	0.495535		-0.531636	-0.315075	0.252992		-1.28722
779	-0.0372776	0.000209907	0.138566	0.227623	-0.190495	-0.137303	0.0121824	0.495594		-0.530499	-0.316378	0.251371		-1.28393
780	-0.0371642	3.78648e-05	0.138611	0.227458	-0.189994	-0.137275	0.0122869	0.495647		-0.529385	-0.317704	0.249785		-1.3168
781	-0.0370531	-0.000117389	0.138653	0.227289	-0.18949	-0.137224	0.0123982	0.495693		-0.528293	-0.319052	0.248233		-1.2412
782	-0.0369443	-0.000255733	0.138693	0.227115	-0.188984	-0.137151	0.0125163	0.495733		-0.527223	-0.320422	0.246717		-1.26421
783	-0.0368378	-0.00037705	0.13873	0.226937	-0.188476	-0.137055	0.0126413	0.495768		-0.526175	-0.321815	0.245237		-1.24449
784	-0.0367336	-0.000481229	0.138765	0.226755	-0.187967	-0.136937	0.0127732	0.495796		-0.525149	-0.323231	0.243793		-1.17546
785	-0.0366318	-0.000568162	0.138798	0.226569	-0.187456	-0.136797	0.0129121	0.495819		-0.524146	-0.32467	0.242386		-1.20504
786	-0.0365323	-0.000637744	0.138828	0.226379	-0.186943	-0.136635	0.0130578	0.495836		-0.523166	-0.326131	0.241015		-1.12615
787	-0.0364354	-0.000689878	0.138856	0.226185	-0.186428	-0.136451	0.0132106	0.495849		-0.522208	-0.327614	0.239682		-1.12615
788	-0.0363409	-0.000724471	0.138882	0.225988	-0.185912	-0.136245	0.0133702	0.495856		-0.521273	-0.329119	0.238386		-1.17217
789	-0.0362488	-0.000741436	0.138905	0.225788	-0.185394	-0.136018	0.0135369	0.495859		-0.520361	-0.330646	0.237128		-1.17546
790	-0.0361594	-0.000740692	0.138926	0.225584	-0.184875	-0.13577	0.0137104	0.495857		-0.519472	-0.332194	0.235908		-1.26421
791	-0.0360724	-0.000722164	0.138945	0.225378	-0.184354	-0.1355	0.0138909	0.495851		-0.518606	-0.333762	0.234727		-1.27078
792	-0.035988	-0.000685777	0.138961	0.225168	-0.183832	-0.13521	0.0140782	0.49584		-0.517764	-0.335351	0.233586		-1.23791
793	-0.0359062	-0.000631465	0.138974	0.224955	-0.183309	-0.134899	0.0142724	0.495826		-0.516946	-0.336958	0.232483		-1.09986
794	-0.0358271	-0.000559162	0.138985	0.22474	-0.182785	-0.134567	0.0144733	0.495808		-0.516151	-0.338584	0.23142		-1.13273
795	-0.0357505	-0.000468809	0.138994	0.224522	-0.18226	-0.134215	0.014681	0.495786		-0.515381	-0.340228	0.230398		-1.14259
796	-0.0356765	-0.000360353	0.139001	0.224301	-0.181735	-0.133843	0.0148953	0.495761		-0.514635	-0.341888	0.229415		-1.22477
797	-0.0356052	-0.000233739	0.139004	0.224078	-0.181208	-0.133452	0.0151161	0.495732		-0.513914	-0.343564	0.228473		-1.1656
798	-0.0355365	-8.89218e-05	0.139006	0.223853	-0.180681	-0.133041	0.0153434	0.495699		-0.513218	-0.345254	0.227572		-1.19518
799	-0.0354704	7.41456e-05	0.139005	0.223625	-0.180153	-0.132612	0.015577	0.495664		-0.512547	-0.346957	0.226713		-1.18204
800	-0.0354069	0.000255505	0.139001	0.223395	-0.179625	-0.132163	0.0158169	0.495625		-0.511901	-0.348673	0.225894		-1.20833
801	-0.035346	0.000455197	0.138994	0.223163	-0.179097	-0.131697	0.016063	0.495583		-0.511281	-0.350398	0.225117		-1.25435
802	-0.0352878	0.000673257	0.138985	0.222928	-0.178568	-0.131212	0.016315	0.495538		-0.510688	-0.352133	0.224382		-1.20504
803	-0.0352321	0.00090972	0.138974	0.222692	-0.178039	-0.130709	0.0165729	0.49549		-0.510122	-0.353875	0.223688		-1.32337
804	-0.035179	0.00116462	0.13896	0.222454	-0.17751	-0.13019	0.0168366	0.495439		-0.509583	-0.355624	0.223036		-1.32337
805	-0.0351284	0.00143798	0.138943	0.222213	-0.176982	-0.129653	0.0171058	0.495385		-0.509073	-0.357377	0.222427		-1.33981
806	-0.0350804	0.00172984	0.138923	0.221971	-0.176454	-0.1291	0.0173806	0.495328		-0.50859	-0.359133	0.221859		-1.23791
807	-0.0350349	0.00204022	0.138901	0.221727	-0.175926	-0.128531	0.0176606	0.495268		-0.508137	-0.36089	0.221334		-1.18532
808	-0.034992	0.00236915	0.138876	0.221481	-0.175399	-0.127946	0.0179459	0.495205		-0.507714	-0.362647	0.22085		-1.30037
809	-0.0349515	0.00271665	0.138848	0.221234	-0.174872	-0.127345	0.0182361	0.495138		-0.507321	-0.364403	0.220409		-1.26093
810	-0.0349134	0.00308275	0.138818	0.220984	-0.174347	-0.12673	0.0185312	0.495068		-0.506959	-0.366155	0.22001		-1.33981
811	-0.0348779	0.00346746	0.138784	0.220733	-0.173823	-0.126101	0.0188309	0.494995		-0.506629	-0.367901	0.219653		-1.3168
812	-0.0348447	0.0038708	0.138748	0.22048	-0.1733	-0.125457	0.0191352	0.494918		-0.506331	-0.369641	0.219338		-1.33652
813	-0.034814	0.00429279	0.138709	0.220225	-0.172778	-0.124799	0.0194437	0.494837		-0.506065	-0.371372	0.219064		-1.35624
814	-0.0347857	0.00473343	0.138668	0.219968	-0.172258	-0.124129	0.0197565	0.494753		-0.505832	-0.373092	0.218833		-1.45486
815	-0.0347598	0.00519275	0.138623	0.21971	-0.17174	-0.123445	0.0200731	0.494664		-0.505633	-0.374801	0.218642		-1.39897
816	-0.0347364	0.00567075	0.138576	0.21945	-0.171224	-0.12275	0.0203936	0.494572		-0.505468	-0.376495	0.218493		-1.36282
817	-0.0347153	0.00616746	0.138526	0.219188	-0.17071	-0.122042	0.0207176	0.494475		-0.505337	-0.378174	0.218384		-1.42198
818	-0.0346966	0.00668286	0.138473	0.218925	-0.170198	-0.121324	0.0210451	0.494374		-0.505241	-0.379836	0.218316		-1.34638
819	-0.0346804	0.00721698	0.138417	0.218659	-0.169689	-0.120594	0.0213759	0.494268		-0.50518	-0.381479	0.218289		-1.37926
820	-0.0346666	0.00776982	0.138358	0.218392	-0.169183	-0.119854	0.0217097	0.494158		-0.505154	-0.383101	0.218301		-1.37926
821	-0.0346552	0.00834138	0.138297	0.218123	-0.16868	-0.119104	0.0220464	0.494043		-0.505163	-0.384701	0.218353		-1.37267
822	-0.0346463	0.00893167	0.138233	0.217853	-0.16818	-0.118345	0.0223859	0.493922		-0.505208	-0.386277	0.218444		-1.38254
823	-0.0346399	0.00954067	0.138166	0.217581	-0.167684	-0.117577	0.022728	0.493797		-0.505288	-0.387828	0.218574		-1.47458
824	-0.0346359	0.0101684	0.138096	0.217306	-0.167192	-0.1168	0.0230725	0.493666		-0.505403	-0.389352	0.218742		-1.40555
825	-0.0346345	0.0108149	0.138024	0.21703	-0.166703	-0.116016	0.0234192	0.493529		-0.505554	-0.390847	0.218948		-1.41869
826	-0.0346356	0.01148	0.137949	0.216753	-0.166219	-0.115223	0.023768	0.493387		-0.505739	-0.392313	0.219192		-1.35624
827	-0.0346393	0.0121639	0.137871	0.216473	-0.165739	-0.114424	0.0241187	0.493239		-0.50596	-0.393747	0.219474		-1.40884
828	-0.0346457	0.0128664	0.137791	0.216192	-0.165263	-0.113619	0.0244711	0.493084		-0.506215	-0.39515	0.219792		-1.49101
829	-0.0346546	0.0135876	0.137708	0.215908	-0.164793	-0.112807	0.024825	0.492924		-0.506505	-0.396519	0.220147		-1.5173
830	-0.0346663	0.0143275	0.137622	0.215623	-0.164327	-0.11199	0.0251802	0.492757		-0.506829	-0.397853	0.220539		-1.58633
831	-0.0346806	0.015086	0.137534	0.215336	-0.163867	-0.111168	0.0255366	0.492583		-0.507186	-0.399151	0.220966		-1.54032
832	-0.0346978	0.0158631	0.137443	0.215046	-0.163412	-0.110341	0.025894	0.492402		-0.507577	-0.400413	0.221428		-1.57976
833	-0.0347177	0.0166588	0.13735	0.214755	-0.162963	-0.10951	0.0262523	0.492215		-0.508002	-0.401636	0.221925		-1.55675
834	-0.0347404	0.0174731	0.137255	0.214461	-0.16252	-0.108676	0.0266111	0.49202		-0.508459	-0.402822	0.222457		-1.58305
835	-0.034766	0.0183059	0.137157	0.214166	-0.162083	-0.107838	0.0269704	0.491817		-0.508948	-0.403968	0.223023		-1.6192
836	-0.0347945	0.0191571	0.137057	0.213868	-0.161652	-0.106998	0.0273301	0.491607		-0.509469	-0.405073	0.223623		-1.62249
837	-0.0348259	0.0200268	0.136954	0.213568	-0.161228	-0.106156	0.0276898	0.491389		-0.510021	-0.406139	0.224256		-1.63892
838	-0.0348604	0.0209148	0.13685	0.213265	-0.16081	-0.105312	0.0280496	0.491163		-0.510604	-0.407163	0.224922		-1.63564
839	-0.0348979	0.0218212	0.136743	0.21296	-0.160399	-0.104467	0.0284092	0.490928		-0.511217	-0.408145	0.22562		-1.5929
840	-0.0349384	0.0227458	0.136633	0.212652	-0.159995	-0.103622	0.0287684	0.490685		-0.511859	-0.409086	0.22635		-1.55675
841	-0.0349821	0.0236886	0.136522	0.212342	-0.159598	-0.102776	0.0291272	0.490434		-0.51253	-0.409985	0.227111		-1.68822
842	-0.035029	0.0246494	0.136409	0.212029	-0.159209	-0.10193	0.0294854	0.490173		-0.51323	-0.410841	0.227903		-1.64879
843	-0.035079	0.0256282	0.136294	0.211714	-0.158826	-0.101084	0.0298428	0.489903		-0.513956	-0.411655	0.228725		-1.6948
844	-0.0351323	0.0266248	0.136177	0.211395	-0.158452	-0.10024	0.0301993	0.489624		-0.514709	-0.412426	0.229577		-1.71124
845	-0.0351889	0.0276392	0.136058	0.211074	-0.158084	-0.0993971	0.0305548	0.489335		-0.515487	-0.413154	0.230458		-1.73425
846	-0.0352489	0.0286711	0.135937	0.21075	-0.157725	-0.0985563	0.0309091	0.489037		-0.51629	-0.41384	0.231367		-1.79999
847	-0.0353121	0.0297204	0.135814	0.210422	-0.157373	-0.0977177	0.0312622	0.488729		-0.517116	-0.414483	0.232303		-1.74411
848	-0.0353788	0.0307869	0.13569	0.210091	-0.157029	-0.0968819	0.0316138	0.48841		-0.517966	-0.415084	0.233267		-1.72767
849	-0.035449	0.0318704	0.135564	0.209757	-0.156693	-0.0960493	0.031964	0.488082		-0.518836	-0.415644	0.234257		-1.84929
850	-0.0355226	0.0329706	0.135436	0.209419	-0.156365	-0.0952203	0.0323125	0.487743		-0.519728	-0.416162	0.235273		-1.83943
851	-0.0355998	0.0340875	0.135307	0.209078	-0.156046	-0.0943952	0.0326593	0.487393		-0.520639	-0.416639	0.236314		-1.83614
852	-0.0356805	0.0352206	0.135177	0.208733	-0.155734	-0.0935746	0.0330042	0.487033		-0.521569	-0.417076	0.237379		-1.85587
853	-0.0357649	0.0363697	0.135045	0.208385	-0.15543	-0.0927587	0.0333472	0.486662		-0.522517	-0.417474	0.238468		-1.846
854	-0.0358528	0.0375344	0.134912	0.208032	-0.155135	-0.0919479	0.0336882	0.486279		-0.523482	-0.417833	0.23958		-1.86572
855	-0.0359445	0.0387146	0.134777	0.207676	-0.154848	-0.0911427	0.034027	0.485886		-0.524463	-0.418154	0.240715		-1.93475
856	-0.0360398	0.0399097	0.134642	0.207315	-0.154569	-0.0903434	0.0343636	0.485481		-0.525459	-0.418439	0.241871		-1.82957
857	-0.0361389	0.0411195	0.134505	0.20695	-0.154299	-0.0895503	0.0346978	0.485065		-0.526468	-0.418689	0.243048		-1.93147
858	-0.0362418	0.0423435	0.134367	0.206581	-0.154037	-0.0887639	0.0350296	0.484637		-0.527491	-0.418904	0.244246		-1.78027
859	-0.0363485	0.0435813	0.134228	0.206207	-0.153783	-0.0879843	0.035359	0.484198		-0.528525	-0.419086	0.245463		-1.83614
860	-0.0364589	0.0448325	0.134088	0.205828	-0.153537	-0.087212	0.0356857	0.483747		-0.52957	-0.419236	0.246699		-1.84271
861	-0.0365732	0.0460967	0.133947	0.205445	-0.1533	-0.0864473	0.0360098	0.483284		-0.530625	-0.419356	0.247954		-1.81313
862	-0.0366913	0.0473732	0.133805	0.205057	-0.15307	-0.0856905	0.0363312	0.48281		-0.531689	-0.419448	0.249226		-1.80656
863	-0.0368131	0.0486617	0.133662	0.204664	-0.152848	-0.0849419	0.0366497	0.482323		-0.53276	-0.419512	0.250516		-1.81641
864	-0.0369388	0.0499617	0.133518	0.204266	-0.152635	-0.0842018	0.0369655	0.481825		-0.533837	-0.419551	0.251822		-1.74082
865	-0.0370681	0.0512725	0.133373	0.203863	-0.152429	-0.0834704	0.0372784	0.481314		-0.53492	-0.419566	0.253144		-1.84929
866	-0.0372012	0.0525938	0.133228	0.203454	-0.152231	-0.0827481	0.0375883	0.480792		-0.536006	-0.419559	0.254481		-1.81313
867	-0.037338	0.053925	0.133081	0.20304	-0.15204	-0.082035	0.0378953	0.480257		-0.537095	-0.419532	0.255832		-1.83614
868	-0.0374783	0.0552655	0.132934	0.202621	-0.151857	-0.0813315	0.0381992	0.479711		-0.538185	-0.419487	0.257197		-1.846
869	-0.0376221	0.0566148	0.132786	0.202196	-0.15168	-0.0806378	0.0385	0.479153		-0.539275	-0.419426	0.258576		-1.74739
870	-0.0377694	0.0579723	0.132637	0.201765	-0.151511	-0.0799541	0.0387977	0.478583		-0.540365	-0.419352	0.259966		-1.75069
871	-0.0379201	0.0593376	0.132488	0.201328	-0.151348	-0.0792806	0.0390923	0.478001		-0.541451	-0.419266	0.261368		-1.80985
872	-0.038074	0.06071	0.132337	0.200886	-0.151192	-0.0786174	0.0393835	0.477407		-0.542534	-0.419171	0.262781		-1.76711
873	-0.038231	0.062089	0.132186	0.200438	-0.151042	-0.0779648	0.0396716	0.476802		-0.543612	-0.419069	0.264204		-1.76383
874	-0.0383911	0.063474	0.132034	0.199984	-0.150898	-0.0773228	0.0399563	0.476185		-0.544684	-0.418963	0.265636		-1.80656
875	-0.0385542	0.0648646	0.131881	0.199524	-0.15076	-0.0766917	0.0402376	0.475556		-0.545748	-0.418854	0.267076		-1.67837
876	-0.03872	0.0662601	0.131728	0.199057	-0.150628	-0.0760716	0.0405155	0.474916		-0.546803	-0.418745	0.268523		-1.73096
877	-0.0388885	0.0676601	0.131573	0.198585	-0.150501	-0.0754626	0.04079	0.474265		-0.547848	-0.418639	0.269978		-1.77369
878	-0.0390596	0.069064	0.131418	0.198106	-0.150379	-0.0748647	0.0410611	0.473603		-0.54888	-0.418538	0.271437		-1.77041
879	-0.0392331	0.0704713	0.131262	0.197622	-0.150261	-0.0742782	0.0413286	0.472929		-0.549899	-0.418444	0.272902		-1.79013
880	-0.0394088	0.0718815	0.131105	0.197131	-0.150148	-0.0737029	0.0415926	0.472245		-0.550904	-0.41836	0.274371		-1.78355
881	-0.0395866	0.073294	0.130947	0.196633	-0.150039	-0.0731391	0.041853	0.47155		-0.551891	-0.418288	0.275842		-1.74082
882	-0.0397664	0.0747085	0.130788	0.19613	-0.149935	-0.0725867	0.0421097	0.470845		-0.552861	-0.418231	0.277315		-1.76711
883	-0.039948	0.0761243	0.130628	0.19562	-0.149833	-0.0720459	0.0423628	0.47013		-0.553812	-0.41819	0.27879		-1.76054
884	-0.0401312	0.077541	0.130467	0.195104	-0.149735	-0.0715165	0.0426122	0.469405		-0.554742	-0.418169	0.280264		-1.74411
885	-0.040316	0.0789582	0.130305	0.194582	-0.149641	-0.0709988	0.0428578	0.46867		-0.555649	-0.418169	0.281738		-1.67837
886	-0.0405021	0.0803754	0.130143	0.194054	-0.149549	-0.0704927	0.0430995	0.467925		-0.556532	-0.418192	0.28321		-1.68822
887	-0.0406894	0.081792	0.129979	0.19352	-0.149459	-0.0699981	0.0433373	0.467171		-0.557389	-0.418241	0.284678		-1.68822
888	-0.0408777	0.0832078	0.129814	0.192979	-0.149372	-0.0695152	0.0435711	0.466408		-0.558219	-0.418317	0.286143		-1.71452
889	-0.0410669	0.0846222	0.129647	0.192433	-0.149287	-0.0690439	0.0438009	0.465637		-0.55902	-0.418424	0.287604		-1.62577
890	-0.0412568	0.0860348	0.12948	0.191881	-0.149204	-0.0685841	0.0440265	0.464857		-0.559791	-0.418562	0.289058		-1.6455
891	-0.0414472	0.0874453	0.129311	0.191323	-0.149122	-0.068136	0.0442479	0.464069		-0.560531	-0.418734	0.290506		-1.62249
892	-0.041638	0.0888533	0.129141	0.190759	-0.149041	-0.0676993	0.044465	0.463272		-0.561236	-0.418941	0.291946		-1.60934
893	-0.0418289	0.0902583	0.128969	0.19019	-0.148962	-0.0672742	0.0446777	0.462469		-0.561908	-0.419187	0.293377		-1.65536
894	-0.0420199	0.09166	0.128796	0.189615	-0.148883	-0.0668606	0.0448859	0.461657		-0.562542	-0.419471	0.294799		-1.6455
895	-0.0422106	0.093058	0.128622	0.189035	-0.148804	-0.0664584	0.0450895	0.460839		-0.563139	-0.419797	0.29621		-1.7211
896	-0.042401	0.0944519	0.128446	0.188449	-0.148726	-0.0660676	0.0452885	0.460014		-0.563697	-0.420165	0.29761		-1.77041
897	-0.0425909	0.0958415	0.128268	0.187858	-0.148647	-0.0656881	0.0454827	0.459182		-0.564214	-0.420578	0.298998		-1.74411
898	-0.0427799	0.0972264	0.128088	0.187262	-0.148568	-0.0653198	0.0456721	0.458344		-0.564689	-0.421036	0.300372		-1.73096
899	-0.0429681	0.0986063	0.127907	0.186661	-0.148489	-0.0649627	0.0458565	0.457499		-0.565121	-0.421542	0.301733		-1.7211
900	-0.043155	0.0999809	0.127724	0.186056	-0.148408	-0.0646167	0.046036	0.456649		-0.565507	-0.422097	0.303079		-1.72439
901	-0.0433406	0.10135	0.127539	0.185445	-0.148327	-0.0642817	0.0462103	0.455792		-0.565846	-0.422702	0.30441		-1.71452
902	-0.0435247	0.102713	0.127352	0.18483	-0.148243	-0.0639576	0.0463795	0.454931		-0.566137	-0.423359	0.305725		-1.68494
903	-0.043707	0.10407	0.127163	0.18421	-0.148158	-0.0636443	0.0465434	0.454063		-0.566379	-0.424068	0.307022		-1.75069
904	-0.0438874	0.105421	0.126972	0.183586	-0.148071	-0.0633417	0.046702	0.453191		-0.566569	-0.424832	0.308303		-1.74411
905	-0.0440656	0.106765	0.126779	0.182957	-0.147982	-0.0630498	0.0468552	0.452314		-0.566707	-0.425651	0.309564		-1.71124
906	-0.0442414	0.108102	0.126583	0.182324	-0.14789	-0.0627683	0.0470029	0.451432		-0.566791	-0.426527	0.310807		-1.7211
907	-0.0444147	0.109432	0.126386	0.181688	-0.147795	-0.0624973	0.0471451	0.450545		-0.566819	-0.42746	0.312031		-1.71452
908	-0.0445853	0.110755	0.126185	0.181047	-0.147697	-0.0622365	0.0472817	0.449654		-0.56679	-0.428453	0.313234		-1.68822
909	-0.0447528	0.11207	0.125983	0.180403	-0.147596	-0.0619858	0.0474125	0.448758		-0.566704	-0.429506	0.314416		-1.68494
910	-0.0449173	0.113378	0.125778	0.179755	-0.147491	-0.0617452	0.0475376	0.447858		-0.566558	-0.430619	0.315577		-1.70138
911	-0.0450783	0.114678	0.12557	0.179104	-0.147383	-0.0615145	0.0476568	0.446954		-0.566351	-0.431796	0.316716		-1.64879
912	-0.0452359	0.115971	0.12536	0.178449	-0.14727	-0.0612935	0.0477701	0.446047		-0.566082	-0.433035	0.317832		-1.68822
913	-0.0453897	0.117255	0.125146	0.177791	-0.147152	-0.0610821	0.0478773	0.445135		-0.565751	-0.434339	0.318925		-1.67179
914	-0.0455396	0.118532	0.12493	0.17713	-0.14703	-0.0608802	0.0479785	0.44422		-0.565355	-0.435709	0.319995		-1.63564
915	-0.0456854	0.1198	0.124711	0.176467	-0.146904	-0.0606877	0.0480735	0.443301		-0.564894	-0.437146	0.32104		-1.69151
916	-0.0458269	0.121061	0.124489	0.1758	-0.146772	-0.0605044	0.0481623	0.442379		-0.564368	-0.43865	0.322061		-1.63892
917	-0.0459641	0.122312	0.124264	0.175131	-0.146634	-0.0603301	0.0482448	0.441454		-0.563774	-0.440223	0.323056		-1.68166
918	-0.0460966	0.123556	0.124036	0.17446	-0.146491	-0.0601647	0.048321	0.440525		-0.563113	-0.441866	0.324026		-1.62249
919	-0.0462243	0.124791	0.123805	0.173786	-0.146342	-0.060008	0.0483908	0.439594		-0.562384	-0.44358	0.32497		-1.63235
920	-0.0463471	0.126018	0.12357	0.17311	-0.146187	-0.05986	0.0484541	0.438659		-0.561587	-0.445365	0.325888		-1.6455
921	-0.0464648	0.127237	0.123332	0.172433	-0.146026	-0.0597204	0.048511	0.437722		-0.560719	-0.447224	0.326779		-1.70138
922	-0.0465774	0.128447	0.123091	0.171753	-0.145858	-0.0595891	0.0485614	0.436782		-0.559782	-0.449156	0.327644		-1.5929
923	-0.0466845	0.129649	0.122846	0.171072	-0.145683	-0.0594659	0.0486052	0.43584		-0.558775	-0.451162	0.328481		-1.6455
924	-0.0467862	0.130842	0.122598	0.17039	-0.145501	-0.0593507	0.0486425	0.434895		-0.557697	-0.453243	0.329291		-1.59948
925	-0.0468822	0.132027	0.122346	0.169707	-0.145312	-0.0592433	0.0486733	0.433948		-0.556549	-0.455401	0.330073		-1.58305
926	-0.0469725	0.133204	0.122091	0.169022	-0.145115	-0.0591436	0.0486974	0.432999		-0.555329	-0.457635	0.330828		-1.5699
927	-0.047057	0.134372	0.121832	0.168337	-0.144911	-0.0590514	0.048715	0.432048		-0.554038	-0.459947	0.331555		-1.62907
928	-0.0471354	0.135532	0.121569	0.167651	-0.144699	-0.0589666	0.0487259	0.431095		-0.552676	-0.462337	0.332254		-1.57318
929	-0.0472078	0.136683	0.121303	0.166965	-0.144479	-0.0588889	0.0487302	0.43014		-0.551243	-0.464805	0.332926		-1.46143
930	-0.0472741	0.137827	0.121034	0.166278	-0.144251	-0.0588182	0.048728	0.429184		-0.549739	-0.467353	0.33357		-1.47458
931	-0.047334	0.138962	0.12076	0.165592	-0.144014	-0.0587544	0.0487191	0.428227		-0.548164	-0.46998	0.334186		-1.38911
932	-0.0473876	0.140088	0.120483	0.164905	-0.143769	-0.0586973	0.0487037	0.427268		-0.546518	-0.472686	0.334774		-1.3661
933	-0.0474348	0.141207	0.120202	0.164219	-0.143515	-0.0586467	0.0486818	0.426308		-0.544802	-0.475474	0.335335		-1.32666
934	-0.0474755	0.142317	0.119918	0.163534	-0.143252	-0.0586024	0.0486533	0.425347		-0.543016	-0.478341	0.335869		-1.37926
935	-0.0475097	0.143419	0.11963	0.162849	-0.14298	-0.0585643	0.0486183	0.424386		-0.54116	-0.48129	0.336375		-1.30694
936	-0.0475372	0.144513	0.119338	0.162165	-0.142699	-0.0585321	0.0485769	0.423423		-0.539235	-0.484319	0.336853		-1.39568
937	-0.0475581	0.145598	0.119042	0.161483	-0.142409	-0.0585058	0.0485291	0.42246		-0.537242	-0.487429	0.337305		-1.41212
938	-0.0475722	0.146676	0.118743	0.160802	-0.142109	-0.058485	0.0484748	0.421497		-0.53518	-0.490619	0.337729		-1.35295
939	-0.0475796	0.147745	0.11844	0.160122	-0.1418	-0.0584696	0.0484143	0.420533		-0.533052	-0.49389	0.338127		-1.33981
940	-0.0475803	0.148806	0.118133	0.159445	-0.141481	-0.0584595	0.0483473	0.419569		-0.530857	-0.497242	0.338498		-1.26421
941	-0.0475741	0.149859	0.117822	0.158769	-0.141152	-0.0584543	0.0482741	0.418605		-0.528597	-0.500673	0.338843		-1.28065
942	-0.047561	0.150904	0.117508	0.158095	-0.140813	-0.0584539	0.0481947	0.417641		-0.526272	-0.504184	0.339161		-1.34309
943	-0.0475411	0.151941	0.11719	0.157424	-0.140464	-0.0584581	0.0481091	0.416677		-0.523882	-0.507775	0.339454		-1.31023
944	-0.0475143	0.15297	0.116868	0.156755	-0.140105	-0.0584667	0.0480174	0.415713		-0.52143	-0.511444	0.33972		-1.32009
945	-0.0474806	0.153991	0.116543	0.156089	-0.139736	-0.0584794	0.0479196	0.41475		-0.518915	-0.51519	0.339962		-1.30694
946	-0.04744	0.155003	0.116214	0.155426	-0.139357	-0.058496	0.0478158	0.413787		-0.516338	-0.519014	0.340178		-1.35954
947	-0.0473925	0.156008	0.115882	0.154766	-0.138967	-0.0585163	0.0477061	0.412824		-0.513701	-0.522914	0.34037		-1.2905
948	-0.0473381	0.157005	0.115546	0.154108	-0.138567	-0.05854	0.0475905	0.411862		-0.511004	-0.526889	0.340537		-1.29707
949	-0.0472769	0.157993	0.115206	0.153454	-0.138156	-0.058567	0.0474692	0.4109		-0.508248	-0.530939	0.34068		-1.27407
950	-0.0472088	0.158974	0.114863	0.152804	-0.137735	-0.0585969	0.0473421	0.409939		-0.505433	-0.535061	0.3408		-1.32009
951	-0.0471339	0.159947	0.114517	0.152157	-0.137303	-0.0586295	0.0472094	0.408979		-0.502562	-0.539256	0.340896		-1.28393
952	-0.0470523	0.160911	0.114167	0.151514	-0.136861	-0.0586646	0.0470712	0.40802		-0.499634	-0.543522	0.34097		-1.25106
953	-0.0469639	0.161868	0.113814	0.150874	-0.136409	-0.0587018	0.0469276	0.407061		-0.49665	-0.547858	0.34102		-1.23791
954	-0.0468688	0.162818	0.113458	0.150239	-0.135946	-0.058741	0.0467787	0.406102		-0.493611	-0.552262	0.341049		-1.14587
955	-0.0467671	0.163759	0.113098	0.149607	-0.135473	-0.0587819	0.0466245	0.405145		-0.490518	-0.556732	0.341056		-1.16888
956	-0.0466588	0.164693	0.112736	0.14898	-0.134989	-0.0588242	0.0464652	0.404188		-0.487371	-0.561268	0.341042		-1.21819
957	-0.046544	0.165618	0.11237	0.148357	-0.134495	-0.0588677	0.0463009	0.403233		-0.484171	-0.565867	0.341006		-1.19847
958	-0.0464228	0.166536	0.112001	0.147738	-0.133991	-0.0589119	0.0461317	0.402278		-0.480919	-0.570528	0.34095		-1.31023
959	-0.0462952	0.167447	0.111629	0.147124	-0.133477	-0.0589568	0.0459577	0.401324		-0.477615	-0.575249	0.340874		-1.35954
960	-0.0461613	0.16835	0.111255	0.146514	-0.132952	-0.0590019	0.0457791	0.40037		-0.474259	-0.580027	0.340777		-1.25435
961	-0.0460212	0.169245	0.110877	0.145909	-0.132418	-0.0590471	0.045596	0.399418		-0.470853	-0.584861	0.340661		-1.32995
962	-0.045875	0.170132	0.110497	0.145308	-0.131874	-0.0590919	0.0454084	0.398466		-0.467396	-0.589748	0.340526		-1.32666
963	-0.0457228	0.171012	0.110115	0.144712	-0.13132	-0.0591361	0.0452166	0.397516		-0.46389	-0.594687	0.340371		-1.27407
964	-0.0455646	0.171885	0.109729	0.144121	-0.130756	-0.0591795	0.0450207	0.396566		-0.460335	-0.599674	0.340198		-1.35954
965	-0.0454007	0.17275	0.109341	0.143535	-0.130183	-0.0592217	0.0448208	0.395617		-0.456731	-0.604708	0.340007		-1.36939
966	-0.045231	0.173607	0.108951	0.142953	-0.1296	-0.0592624	0.0446171	0.394668		-0.453079	-0.609787	0.339797		-1.36939
967	-0.0450557	0.174457	0.108558	0.142377	-0.129009	-0.0593014	0.0444097	0.393721		-0.44938	-0.614907	0.339569		-1.37596
968	-0.0448749	0.1753	0.108163	0.141805	-0.128408	-0.0593383	0.0441988	0.392774		-0.445633	-0.620066	0.339323		-1.41869
969	-0.0446886	0.176135	0.107766	0.141238	-0.127798	-0.0593729	0.0439845	0.391828		-0.441839	-0.625262	0.33906		-1.45157
970	-0.0444971	0.176963	0.107367	0.140677	-0.12718	-0.0594049	0.043767	0.390882		-0.438	-0.630491	0.33878		-1.43842
971	-0.0443004	0.177783	0.106966	0.14012	-0.126553	-0.059434	0.0435464	0.389938		-0.434115	-0.635752	0.338482		-1.4417
972	-0.0440986	0.178596	0.106563	0.139569	-0.125917	-0.0594599	0.0433229	0.388994		-0.430185	-0.641041	0.338167		-1.54032
973	-0.0438918	0.179402	0.106159	0.139022	-0.125273	-0.0594824	0.0430968	0.38805		-0.426211	-0.646356	0.337836		-1.50416
974	-0.0436802	0.1802	0.105752	0.138481	-0.124622	-0.0595012	0.042868	0.387107		-0.422192	-0.651694	0.337488		-1.51402
975	-0.0434639	0.18099	0.105345	0.137945	-0.123962	-0.0595161	0.0426369	0.386165		-0.41813	-0.657051	0.337124		-1.57318
976	-0.0432429	0.181774	0.104935	0.137414	-0.123295	-0.0595267	0.0424035	0.385223		-0.414025	-0.662426	0.336743		-1.59619
977	-0.0430174	0.18255	0.104525	0.136887	-0.12262	-0.0595328	0.042168	0.384281		-0.409876	-0.667816	0.336347		-1.59619
978	-0.0427875	0.183318	0.104113	0.136366	-0.121938	-0.0595342	0.0419306	0.38334		-0.405686	-0.673217	0.335934		-1.68822
979	-0.0425533	0.184079	0.1037	0.13585	-0.121249	-0.0595307	0.0416914	0.382399		-0.401453	-0.678626	0.335506		-1.61263
980	-0.0423149	0.184832	0.103286	0.135339	-0.120553	-0.0595219	0.0414506	0.381459		-0.397178	-0.684042	0.335062		-1.59619
981	-0.0420725	0.185578	0.102872	0.134832	-0.11985	-0.0595077	0.0412084	0.380518		-0.392862	-0.68946	0.334603		-1.58305
982	-0.041826	0.186316	0.102456	0.134331	-0.119141	-0.0594879	0.0409649	0.379578		-0.388505	-0.694879	0.334129		-1.70795
983	-0.0415756	0.187047	0.10204	0.133834	-0.118425	-0.0594621	0.0407203	0.378638		-0.384107	-0.700295	0.333639		-1.6455
984	-0.0413215	0.18777	0.101623	0.133341	-0.117704	-0.0594302	0.0404746	0.377698		-0.379669	-0.705706	0.333134		-1.71452
985	-0.0410636	0.188485	0.101206	0.132853	-0.116976	-0.0593919	0.0402282	0.376758		-0.375191	-0.711108	0.332615		-1.6685
986	-0.0408022	0.189193	0.100789	0.13237	-0.116243	-0.0593471	0.0399811	0.375817		-0.370674	-0.716499	0.33208		-1.74082
987	-0.0405372	0.189893	0.100372	0.131891	-0.115504	-0.0592956	0.0397334	0.374877		-0.366118	-0.721877	0.331531		-1.66522
988	-0.0402689	0.190586	0.099955	0.131416	-0.11476	-0.059237	0.0394854	0.373936		-0.361523	-0.727238	0.330966		-1.73096
989	-0.0399972	0.19127	0.099538	0.130945	-0.114011	-0.0591714	0.0392372	0.372995		-0.356891	-0.73258	0.330388		-1.68822
990	-0.0397224	0.191947	0.0991215	0.130478	-0.113258	-0.0590983	0.0389889	0.372053		-0.352221	-0.737899	0.329794		-1.71452
991	-0.0394444	0.192616	0.0987054	0.130015	-0.112499	-0.0590178	0.0387408	0.371111		-0.347514	-0.743194	0.329186		-1.82957
992	-0.0391634	0.193277	0.0982899	0.129556	-0.111736	-0.0589295	0.0384928	0.370168		-0.34277	-0.748462	0.328563		-1.81971
993	-0.0388796	0.19393	0.0978753	0.1291	-0.110969	-0.0588333	0.0382453	0.369225		-0.33799	-0.753699	0.327926		-1.80327
994	-0.0385929	0.194576	0.0974615	0.128648	-0.110198	-0.0587291	0.0379983	0.368281		-0.333175	-0.758904	0.327274		-1.85587
995	-0.0383036	0.195214	0.0970489	0.128199	-0.109424	-0.0586168	0.0377519	0.367336		-0.328324	-0.764073	0.326608		-1.85915
996	-0.0380116	0.195844	0.0966375	0.127753	-0.108645	-0.058496	0.0375064	0.36639		-0.323439	-0.769204	0.325927		-1.78683
997	-0.0377171	0.196466	0.0962276	0.12731	-0.107864	-0.0583669	0.0372618	0.365443		-0.318519	-0.774294	0.325232		-1.81641
998	-0.0374202	0.19708	0.0958192	0.126871	-0.107079	-0.0582292	0.0370183	0.364495		-0.313566	-0.779342	0.324522		-1.91174
999	-0.037121	0.197687	0.0954125	0.126433	-0.106292	-0.0580828	0.036776	0.363546		-0.30858	-0.784344	0.323797		-1.84271
1000	-0.0368195	0.198286	0.0950077	0.125999	-0.105502	-0.0579276	0.0365349	0.362596		-0.303561	-0.789298	0.323059		-1.92489
1001	-0.0365159	0.198877	0.094605	0.125567	-0.104709	-0.0577635	0.0362954	0.361644		-0.29851	-0.794201	0.322305		-1.91503
1002	-0.0362102	0.199461	0.0942045	0.125137	-0.103915	-0.0575906	0.0360573	0.36069		-0.293428	-0.799053	0.321538		-1.93803
1003	-0.0359026	0.200037	0.0938063	0.12471	-0.103118	-0.0574086	0.0358209	0.359736		-0.288314	-0.803849	0.320757		-1.99063
1004	-0.035593	0.200605	0.0934107	0.124284	-0.10232	-0.0572176	0.0355863	0.358779		-0.283169	-0.808588	0.319961		-1.98077
1005	-0.0352817	0.201166	0.0930178	0.123861	-0.10152	-0.0570175	0.0353534	0.357821		-0.277995	-0.813269	0.319152		-2.03008
1006	-0.0349686	0.201719	0.0926277	0.123439	-0.100719	-0.0568083	0.0351225	0.356861		-0.27279	-0.817888	0.318329		-1.92818
1007	-0.0346538	0.202265	0.0922406	0.123019	-0.0999163	-0.0565899	0.0348936	0.355899		-0.267557	-0.822444	0.317493		-1.9742
1008	-0.0343375	0.202804	0.0918566	0.122601	-0.0991131	-0.0563624	0.0346667	0.354936		-0.262294	-0.826936	0.316643		-2.06952
1009	-0.0340196	0.203336	0.091476	0.122184	-0.0983091	-0.0561258	0.0344419	0.35397		-0.257003	-0.83136	0.315781		-1.9972
1010	-0.0337003	0.203861	0.0910987	0.121768	-0.0975048	-0.05588	0.0342192	0.353003		-0.251685	-0.835716	0.314906		-1.98077
1011	-0.0333797	0.204378	0.090725	0.121353	-0.0967002	-0.0556251	0.0339988	0.352033		-0.246339	-0.840001	0.314018		-2.06294
1012	-0.0330577	0.204889	0.0903551	0.12094	-0.0958956	-0.0553612	0.0337806	0.351061		-0.240967	-0.844214	0.313119		-2.0498
1013	-0.0327346	0.205393	0.089989	0.120527	-0.0950913	-0.0550882	0.0335646	0.350088		-0.235569	-0.848353	0.312207		-2.0465
1014	-0.0324103	0.205891	0.0896269	0.120116	-0.0942874	-0.0548063	0.033351	0.349112		-0.230147	-0.852417	0.311285		-2.11224
1015	-0.032085	0.206382	0.089269	0.119705	-0.0934842	-0.0545156	0.0331398	0.348134		-0.224701	-0.856404	0.310351		-2.09252
1016	-0.0317586	0.206867	0.0889153	0.119295	-0.092682	-0.0542161	0.032931	0.347155		-0.219231	-0.860312	0.309408		-2.14512
1017	-0.0314314	0.207345	0.0885661	0.118885	-0.0918809	-0.0539081	0.0327246	0.346173		-0.21374	-0.86414	0.308454		-2.22072
1018	-0.0311033	0.207818	0.0882213	0.118476	-0.0910812	-0.0535915	0.0325206	0.345189		-0.208228	-0.867887	0.307491		-2.13197
1019	-0.0307745	0.208284	0.0878813	0.118067	-0.0902831	-0.0532666	0.0323192	0.344203		-0.202696	-0.871551	0.306519		-2.11224
1020	-0.0304449	0.208745	0.0875461	0.117658	-0.0894869	-0.0529336	0.0321202	0.343216		-0.197146	-0.875132	0.305538		-2.24044
1021	-0.0301148	0.209199	0.0872158	0.11725	-0.0886928	-0.0525926	0.0319238	0.342226		-0.191579	-0.878629	0.30455		-2.10896
1022	-0.0297841	0.209648	0.0868906	0.116842	-0.087901	-0.0522438	0.03173	0.341235		-0.185996	-0.88204	0.303555		-2.0235
1023	-0.0294529	0.210091	0.0865706	0.116434	-0.0871117	-0.0518876	0.0315387	0.340242		-0.180398	-0.885366	0.302554		-2.14183
1024	-0.0291213	0.210529	0.0862558	0.116026	-0.0863252	-0.051524	0.03135	0.339248		-0.174787	-0.888604	0.301547		-2.06294
1025	-0.0287893	0.210961	0.0859465	0.115618	-0.0855416	-0.0511533	0.0311639	0.338252		-0.169164	-0.891755	0.300535		-2.11224
1026	-0.028457	0.211387	0.0856427	0.11521	-0.0847612	-0.0507759	0.0309804	0.337254		-0.163532	-0.894817	0.299519		-2.05309
1027	-0.0281244	0.211808	0.0853444	0.114802	-0.0839841	-0.050392	0.0307994	0.336255		-0.157891	-0.897792	0.298499		-2.11553
1028	-0.0277916	0.212223	0.0850519	0.114394	-0.0832105	-0.0500018	0.030621	0.335255		-0.152243	-0.900677	0.297477		-2.03664
1029	-0.0274587	0.212633	0.0847651	0.113985	-0.0824407	-0.0496058	0.0304452	0.334254		-0.146591	-0.903474	0.296453		-2.10239
1030	-0.0271256	0.213038	0.0844842	0.113576	-0.0816747	-0.0492041	0.0302718	0.333252		-0.140934	-0.906182	0.295428		-2.15826
1031	-0.0267924	0.213437	0.0842092	0.113167	-0.0809127	-0.0487971	0.030101	0.332249		-0.135277	-0.908801	0.294403		-2.1254
1032	-0.0264592	0.21383	0.0839402	0.112758	-0.0801549	-0.0483852	0.0299326	0.331245		-0.129619	-0.91133	0.293378		-2.18785
1033	-0.026126	0.214218	0.0836772	0.112349	-0.0794014	-0.0479686	0.0297667	0.330241		-0.123963	-0.913771	0.292355		-2.19771
1034	-0.0257928	0.214601	0.0834203	0.111939	-0.0786524	-0.0475477	0.0296031	0.329236		-0.118311	-0.916122	0.291335		-2.22401
1035	-0.0254596	0.214978	0.0831696	0.111529	-0.0779079	-0.0471229	0.0294419	0.328231		-0.112665	-0.918386	0.290317		-2.29632
1036	-0.0251265	0.215349	0.082925	0.111119	-0.0771681	-0.0466944	0.0292829	0.327227		-0.107025	-0.920561	0.289304		-2.32919
1037	-0.0247934	0.215715	0.0826866	0.110708	-0.0764331	-0.0462627	0.0291262	0.326222		-0.101395	-0.922648	0.288296		-2.32262
1038	-0.0244604	0.216074	0.0824544	0.110297	-0.0757029	-0.0458281	0.0289717	0.325218		-0.0957757	-0.924648	0.287295		-2.38178
1039	-0.0241274	0.216429	0.0822285	0.109886	-0.0749777	-0.0453909	0.0288194	0.324214		-0.0901688	-0.926561	0.286299		-2.28975
1040	-0.0237946	0.216777	0.0820089	0.109475	-0.0742576	-0.0449515	0.0286691	0.323211		-0.0845762	-0.928388	0.285312		-2.29303
1041	-0.0234618	0.217119	0.0817955	0.109063	-0.0735426	-0.0445103	0.0285209	0.322209		-0.0789996	-0.93013	0.284334		-2.35548
1042	-0.0231291	0.217456	0.0815884	0.108651	-0.0728328	-0.0440676	0.0283746	0.321208		-0.0734406	-0.931788	0.283364		-2.30618
1043	-0.0227965	0.217786	0.0813875	0.10824	-0.0721282	-0.0436237	0.0282304	0.320208		-0.0679009	-0.933363	0.282406		-2.25359
1044	-0.022464	0.21811	0.081193	0.107828	-0.0714291	-0.0431791	0.028088	0.319211		-0.0623819	-0.934855	0.281458		-2.22072
1045	-0.0221316	0.218427	0.0810046	0.107416	-0.0707353	-0.042734	0.0279475	0.318215		-0.0568851	-0.936267	0.280523		-2.24701
1046	-0.0217993	0.218738	0.0808225	0.107004	-0.0700471	-0.0422888	0.0278088	0.317221		-0.051412	-0.9376	0.279601		-2.27331
1047	-0.021467	0.219043	0.0806466	0.106592	-0.0693644	-0.0418439	0.0276718	0.316229		-0.0459638	-0.938855	0.278692		-2.30289
1048	-0.0211348	0.21934	0.0804769	0.10618	-0.0686873	-0.0413994	0.0275366	0.31524		-0.0405418	-0.940033	0.277798		-2.25359
1049	-0.0208027	0.219631	0.0803133	0.105768	-0.0680158	-0.0409559	0.0274031	0.314253		-0.0351473	-0.941136	0.27692		-2.19114
1050	-0.0204707	0.219915	0.0801558	0.105357	-0.0673501	-0.0405134	0.0272711	0.31327		-0.0297812	-0.942166	0.276057		-2.13854
1051	-0.0201386	0.220192	0.0800044	0.104945	-0.0666902	-0.0400724	0.0271408	0.312289		-0.0244448	-0.943125	0.275211		-2.13854
1052	-0.0198066	0.220461	0.0798589	0.104534	-0.0660361	-0.0396331	0.0270119	0.311312		-0.0191389	-0.944015	0.274382		-2.10896
1053	-0.0194747	0.220723	0.0797193	0.104123	-0.0653878	-0.0391957	0.0268845	0.310338		-0.0138645	-0.944836	0.273571		-2.14841
1054	-0.0191427	0.220977	0.0795855	0.103713	-0.0647455	-0.0387606	0.0267586	0.309368		-0.00862237	-0.945592	0.272778		-2.24044
1055	-0.0188107	0.221224	0.0794575	0.103303	-0.0641092	-0.0383278	0.0266339	0.308402		-0.00341335	-0.946285	0.272005		-2.19442
1056	-0.0184787	0.221463	0.0793352	0.102893	-0.063479	-0.0378978	0.0265106	0.307439		0.00176187	-0.946915	0.271252		-2.15498
1057	-0.0181467	0.221694	0.0792185	0.102484	-0.0628548	-0.0374705	0.0263884	0.306481		0.00690266	-0.947487	0.270519		-2.13197
1058	-0.0178146	0.221917	0.0791073	0.102075	-0.0622367	-0.0370463	0.0262674	0.305527		0.0120084	-0.948	0.269808		-2.18456
1059	-0.0174824	0.222132	0.0790014	0.101667	-0.0616249	-0.0366253	0.0261475	0.304577		0.0170787	-0.948459	0.269118		-2.18456
1060	-0.0171502	0.222339	0.0789009	0.10126	-0.0610193	-0.0362077	0.0260287	0.303631		0.022113	-0.948864	0.26845		-2.05966
1061	-0.016818	0.222537	0.0788056	0.100853	-0.06042	-0.0357935	0.0259108	0.302691		0.0271109	-0.949219	0.267806		-2.06623
1062	-0.0164856	0.222727	0.0787154	0.100447	-0.059827	-0.035383	0.0257939	0.301754		0.032072	-0.949525	0.267185		-2.05637
1063	-0.0161531	0.222908	0.0786302	0.100042	-0.0592404	-0.0349762	0.0256778	0.300823		0.0369961	-0.949785	0.266588		-2.05637
1064	-0.0158206	0.223081	0.0785498	0.0996375	-0.0586602	-0.0345732	0.0255626	0.299896		0.0418829	-0.95	0.266016		-1.99392
1065	-0.0154879	0.223245	0.0784743	0.0992341	-0.0580865	-0.0341742	0.0254481	0.298974		0.0467323	-0.950175	0.26547		-1.98077
1066	-0.0151552	0.223401	0.0784033	0.0988316	-0.0575194	-0.0337791	0.0253344	0.298057		0.0515443	-0.95031	0.264949		-2.01035
1067	-0.0148223	0.223547	0.0783369	0.0984301	-0.0569588	-0.0333879	0.0252213	0.297145		0.0563188	-0.950407	0.264456		-1.93475
1068	-0.0144894	0.223685	0.0782749	0.0980297	-0.0564049	-0.0330008	0.0251089	0.296238		0.0610559	-0.95047	0.263989		-1.98405
1069	-0.0141564	0.223814	0.0782172	0.0976304	-0.0558577	-0.0326177	0.024997	0.295336		0.0657558	-0.950501	0.263551		-1.9216
1070	-0.0138234	0.223934	0.0781636	0.0972323	-0.0553173	-0.0322385	0.0248856	0.29444		0.0704187	-0.950501	0.263141		-1.93475
1071	-0.0134903	0.224046	0.078114	0.0968354	-0.0547837	-0.0318634	0.0247748	0.293548		0.0750451	-0.950473	0.26276		-1.79341
1072	-0.0131572	0.224148	0.0780683	0.0964399	-0.0542571	-0.0314921	0.0246643	0.292661		0.0796354	-0.95042	0.262409		-1.78027
1073	-0.0128242	0.224242	0.0780264	0.0960457	-0.0537374	-0.0311248	0.0245543	0.291779		0.08419	-0.950343	0.262088		-1.75397
1074	-0.0124912	0.224327	0.077988	0.095653	-0.0532249	-0.0307612	0.0244447	0.290903		0.0887096	-0.950244	0.261798		-1.73425
1075	-0.0121584	0.224403	0.0779532	0.0952619	-0.0527195	-0.0304013	0.0243354	0.290032		0.0931949	-0.950126	0.261539		-1.72439
1076	-0.0118257	0.224471	0.0779217	0.0948723	-0.0522213	-0.030045	0.0242264	0.289165		0.0976464	-0.949991	0.261313		-1.79013
1077	-0.0114932	0.22453	0.0778934	0.0944845	-0.0517305	-0.0296922	0.0241177	0.288304		0.102065	-0.949841	0.261119		-1.67837
1078	-0.0111609	0.22458	0.0778682	0.0940985	-0.0512471	-0.0293428	0.0240091	0.287449		0.106451	-0.949678	0.260958		-1.6455
1079	-0.010829	0.224622	0.077846	0.0937144	-0.0507712	-0.0289967	0.0239007	0.286598		0.110806	-0.949505	0.26083		-1.6192
1080	-0.0104974	0.224656	0.0778265	0.0933323	-0.0503029	-0.0286537	0.0237924	0.285752		0.11513	-0.949323	0.260737		-1.52716
1081	-0.0101663	0.224682	0.0778097	0.0929523	-0.0498423	-0.0283136	0.0236842	0.284912		0.119424	-0.949135	0.260678		-1.60277
1082	-0.00983564	0.224699	0.0777954	0.0925745	-0.0493895	-0.0279764	0.0235759	0.284077		0.123688	-0.948941	0.260655		-1.66193
1083	-0.00950554	0.224709	0.0777835	0.092199	-0.0489446	-0.0276418	0.0234675	0.283247		0.127924	-0.948746	0.260666		-1.47786
1084	-0.00917606	0.224712	0.0777737	0.0918258	-0.0485076	-0.0273098	0.0233589	0.282422		0.132132	-0.94855	0.260713		-1.43842
1085	-0.00884727	0.224707	0.077766	0.0914552	-0.0480787	-0.02698	0.0232501	0.281602		0.136313	-0.948355	0.260797		-1.39897
1086	-0.00851923	0.224694	0.0777602	0.0910872	-0.047658	-0.0266523	0.023141	0.280787		0.140469	-0.948163	0.260917		-1.41869
1087	-0.00819201	0.224675	0.0777562	0.0907218	-0.0472455	-0.0263266	0.0230314	0.279977		0.144599	-0.947977	0.261073		-1.29707
1088	-0.00786567	0.224649	0.0777537	0.0903593	-0.0468413	-0.0260026	0.0229214	0.279173		0.148704	-0.947798	0.261267		-1.2905
1089	-0.00754029	0.224616	0.0777527	0.0899997	-0.0464455	-0.0256801	0.0228107	0.278374		0.152787	-0.947628	0.261498		-1.19189
1090	-0.00721592	0.224578	0.0777529	0.0896431	-0.0460582	-0.025359	0.0226993	0.277579		0.156847	-0.94747	0.261767		-1.23463
1091	-0.00689264	0.224533	0.0777543	0.0892896	-0.0456795	-0.025039	0.0225871	0.27679		0.160886	-0.947323	0.262073		-1.11629
1092	-0.0065705	0.224482	0.0777567	0.0889393	-0.0453093	-0.0247199	0.022474	0.276006		0.164904	-0.947192	0.262417		-1.15574
1093	-0.00624956	0.224426	0.0777599	0.0885924	-0.0449479	-0.0244015	0.0223598	0.275227		0.168903	-0.947076	0.262798		-1.11958
1094	-0.00592989	0.224365	0.0777637	0.0882489	-0.0445953	-0.0240836	0.0222446	0.274453		0.172883	-0.946979	0.263218		-1.09
1095	-0.00561153	0.224298	0.0777681	0.087909	-0.0442515	-0.0237659	0.0221281	0.273684		0.176847	-0.9469	0.263676		-0.974953
1096	-0.00529455	0.224227	0.0777729	0.0875727	-0.0439165	-0.0234482	0.0220102	0.27292		0.180794	-0.946843	0.264171		-0.988098
1097	-0.00497897	0.224152	0.0777779	0.0872402	-0.0435904	-0.0231302	0.0218909	0.272162		0.184727	-0.946808	0.264705		-0.942085
1098	-0.00466484	0.224073	0.0777829	0.0869115	-0.0432732	-0.0228117	0.02177	0.271408		0.188646	-0.946797	0.265276		-0.92894
1099	-0.0043522	0.223989	0.0777879	0.0865869	-0.042965	-0.0224924	0.0216475	0.270659		0.192552	-0.946812	0.265885		-0.945374
1100	-0.00404106	0.223903	0.0777927	0.0862663	-0.0426657	-0.022172	0.0215231	0.269916		0.196447	-0.946854	0.266531		-0.925652
1101	-0.00373146	0.223813	0.0777971	0.08595	-0.0423753	-0.0218503	0.0213967	0.269178		0.200331	-0.946923	0.267215		-0.892776
1102	-0.0034234	0.22372	0.077801	0.085638	-0.0420939	-0.021527	0.0212683	0.268444		0.204207	-0.947023	0.267935		-0.899353
1103	-0.0031169	0.223625	0.0778042	0.0853303	-0.0418213	-0.0212017	0.0211377	0.267716		0.208074	-0.947153	0.268692		-0.804031
1104	-0.00281195	0.223527	0.0778065	0.0850272	-0.0415575	-0.0208743	0.0210047	0.266992		0.211934	-0.947315	0.269486		-0.784309
1105	-0.00250854	0.223427	0.0778079	0.0847287	-0.0413026	-0.0205443	0.0208692	0.266274		0.215789	-0.947511	0.270315		-0.761307
1106	-0.00220668	0.223326	0.0778081	0.084435	-0.0410564	-0.0202116	0.0207311	0.265561		0.219639	-0.94774	0.271181		-0.813889
1107	-0.00190634	0.223224	0.077807	0.084146	-0.0408188	-0.0198757	0.0205902	0.264852		0.223484	-0.948005	0.272081		-0.758011
1108	-0.00160749	0.22312	0.0778044	0.083862	-0.0405898	-0.0195364	0.0204464	0.264149		0.227327	-0.948306	0.273016		-0.741577
1109	-0.0013101	0.223016	0.0778002	0.083583	-0.0403693	-0.0191934	0.0202995	0.263451		0.231167	-0.948644	0.273986		-0.744865
1110	-0.00101413	0.222912	0.0777942	0.0833091	-0.0401572	-0.0188464	0.0201493	0.262757		0.235006	-0.949019	0.27499		-0.695564
1111	-0.000719538	0.222807	0.0777863	0.0830403	-0.0399532	-0.018495	0.0199957	0.262069		0.238845	-0.949433	0.276026		-0.705421
1112	-0.000426267	0.222703	0.0777762	0.0827768	-0.0397575	-0.0181389	0.0198386	0.261385		0.242683	-0.949886	0.277096		-0.682411
1113	-0.00013426	0.222599	0.0777639	0.0825187	-0.0395696	-0.0177777	0.0196777	0.260706		0.246521	-0.950378	0.278198		-0.721855
1114	0.000156547	0.222496	0.0777492	0.0822659	-0.0393896	-0.0174112	0.019513	0.260032		0.250361	-0.95091	0.279332		-0.758011
1115	0.000446222	0.222395	0.0777319	0.0820186	-0.0392172	-0.017039	0.0193443	0.259363		0.254201	-0.951482	0.280497		-0.685699
1116	0.000734837	0.222294	0.077712	0.0817768	-0.0390523	-0.0166608	0.0191715	0.258699		0.258044	-0.952095	0.281693		-0.807312
1117	0.00102247	0.222196	0.0776892	0.0815405	-0.0388946	-0.0162762	0.0189944	0.25804		0.261888	-0.952749	0.282919		-0.767868
1118	0.0013092	0.2221	0.0776635	0.0813099	-0.0387441	-0.015885	0.0188129	0.257386		0.265734	-0.953443	0.284175		-0.738297
1119	0.00159511	0.222006	0.0776347	0.0810848	-0.0386005	-0.0154867	0.0186269	0.256736		0.269583	-0.954178	0.285461		-0.652832
1120	0.0018803	0.221915	0.0776028	0.0808655	-0.0384636	-0.0150812	0.0184362	0.256091		0.273434	-0.954953	0.286775		-0.70871
1121	0.00216485	0.221827	0.0775676	0.0806517	-0.0383332	-0.014668	0.0182407	0.255451		0.277288	-0.955769	0.288117		-0.695564
1122	0.00244886	0.221742	0.0775289	0.0804437	-0.0382091	-0.0142469	0.0180402	0.254816		0.281144	-0.956624	0.289487		-0.672554
1123	0.00273245	0.221661	0.0774868	0.0802413	-0.0380912	-0.0138175	0.0178348	0.254185		0.285002	-0.957519	0.290884		-0.646255
1124	0.00301573	0.221584	0.0774411	0.0800447	-0.037979	-0.0133797	0.0176241	0.253559		0.288862	-0.958452	0.292307		-0.629822
1125	0.0032988	0.22151	0.0773918	0.0798537	-0.0378726	-0.012933	0.0174082	0.252938		0.292723	-0.959423	0.293757		-0.642967
1126	0.00358181	0.221441	0.0773386	0.0796683	-0.0377715	-0.0124773	0.0171869	0.252321		0.296586	-0.960432	0.295232		-0.662689
1127	0.00386488	0.221376	0.0772817	0.0794887	-0.0376755	-0.0120123	0.01696	0.251709		0.30045	-0.961477	0.296731		-0.580517
1128	0.00414815	0.221316	0.0772208	0.0793146	-0.0375844	-0.0115377	0.0167275	0.251101		0.304315	-0.962557	0.298254		-0.616669
1129	0.00443176	0.221261	0.0771559	0.0791461	-0.037498	-0.0110534	0.0164893	0.250498		0.308179	-0.963672	0.299801		-0.626534
1130	0.00471588	0.221211	0.0770869	0.0789832	-0.0374158	-0.0105592	0.0162452	0.249899		0.312043	-0.96482	0.301371		-0.603527
1131	0.00500064	0.221166	0.0770137	0.0788259	-0.0373378	-0.0100547	0.0159952	0.249304		0.315907	-0.966	0.302962		-0.642967
1132	0.00528623	0.221127	0.0769364	0.078674	-0.0372635	-0.00954001	0.0157392	0.248714		0.319768	-0.967211	0.304575		-0.613388
1133	0.0055728	0.221093	0.0768548	0.0785276	-0.0371928	-0.00901481	0.015477	0.248128		0.323628	-0.968452	0.306208		-0.616669
1134	0.00586054	0.221064	0.0767689	0.0783867	-0.0371252	-0.008479	0.0152086	0.247546		0.327484	-0.969722	0.307861		-0.600239
1135	0.00614962	0.221042	0.0766786	0.0782511	-0.0370605	-0.00793246	0.0149339	0.246968		0.331337	-0.971018	0.309533		-0.652832
1136	0.00644023	0.221025	0.0765838	0.0781209	-0.0369985	-0.00737508	0.0146528	0.246394		0.335186	-0.97234	0.311223		-0.619965
1137	0.00673255	0.221015	0.0764846	0.077996	-0.0369388	-0.00680677	0.0143653	0.245824		0.33903	-0.973686	0.312931		-0.541077
1138	0.00702677	0.22101	0.0763809	0.0778763	-0.0368811	-0.00622744	0.0140711	0.245258		0.342868	-0.975054	0.314654		-0.613388
1139	0.0073231	0.221011	0.0762727	0.0777618	-0.0368251	-0.00563704	0.0137704	0.244695		0.346701	-0.976444	0.316394		-0.527931
1140	0.00762172	0.221019	0.07616	0.0776524	-0.0367706	-0.0050355	0.013463	0.244136		0.350526	-0.977854	0.318147		-0.531212
1141	0.00792285	0.221033	0.0760426	0.0775481	-0.0367172	-0.00442281	0.0131488	0.243581		0.354344	-0.979281	0.319915		-0.57066
1142	0.00822667	0.221053	0.0759207	0.0774488	-0.0366646	-0.00379894	0.0128279	0.243029		0.358153	-0.980725	0.321694		-0.527931
1143	0.00853341	0.221079	0.0757943	0.0773544	-0.0366125	-0.00316389	0.0125001	0.242481		0.361954	-0.982183	0.323486		-0.537785
1144	0.00884326	0.221112	0.0756632	0.0772648	-0.0365607	-0.00251765	0.0121654	0.241936		0.365745	-0.983653	0.325288		-0.57394
1145	0.00915643	0.221151	0.0755276	0.07718	-0.0365088	-0.00186025	0.0118238	0.241393		0.369526	-0.985135	0.3271		-0.603527
1146	0.00947312	0.221196	0.0753874	0.0770999	-0.0364566	-0.00119171	0.0114752	0.240854		0.373297	-0.986625	0.32892		-0.527931
1147	0.00979353	0.221248	0.0752426	0.0770244	-0.0364037	-0.000512072	0.0111195	0.240318		0.377056	-0.988122	0.330747		-0.508209
1148	0.0101179	0.221305	0.0750933	0.0769534	-0.03635	0.000178616	0.0107569	0.239784		0.380804	-0.989624	0.33258		-0.481911
1149	0.0104463	0.221369	0.0749395	0.0768869	-0.0362951	0.000880297	0.0103871	0.239253		0.384539	-0.991129	0.334419		-0.432602
1150	0.0107791	0.22144	0.0747812	0.0768247	-0.0362388	0.00159291	0.0100103	0.238724		0.388261	-0.992635	0.336261		-0.504917
1151	0.0111163	0.221516	0.0746184	0.0767667	-0.0361808	0.00231637	0.00962637	0.238197		0.39197	-0.99414	0.338106		-0.567368
1152	0.0114583	0.221598	0.0744512	0.0767129	-0.0361209	0.00305059	0.00923529	0.237672		0.395665	-0.995641	0.339953		-0.606812
1153	0.0118052	0.221686	0.0742797	0.0766632	-0.0360588	0.00379549	0.00883706	0.23715		0.399345	-0.997137	0.3418		-0.521355
1154	0.0121571	0.221781	0.0741038	0.0766174	-0.0359943	0.00455094	0.00843167	0.236629		0.40301	-0.998626	0.343646		-0.590382
1155	0.0125142	0.221881	0.0739236	0.0765754	-0.0359272	0.00531685	0.00801911	0.236109		0.406659	-1.00011	0.345489		-0.58709
1156	0.0128768	0.221986	0.0737391	0.0765372	-0.0358573	0.00609308	0.00759939	0.235591		0.410292	-1.00157	0.34733		-0.524639
1157	0.0132449	0.222098	0.0735505	0.0765026	-0.0357843	0.00687949	0.00717249	0.235075		0.413907	-1.00303	0.349166		-0.603527
1158	0.0136188	0.222215	0.0733577	0.0764715	-0.035708	0.00767594	0.00673843	0.234559		0.417504	-1.00446	0.350995		-0.593662
1159	0.0139985	0.222337	0.0731608	0.0764438	-0.0356283	0.00848228	0.00629721	0.234045		0.421083	-1.00588	0.352818		-0.57066
1160	0.0143843	0.222465	0.0729599	0.0764194	-0.0355449	0.00929833	0.00584885	0.233531		0.424642	-1.00729	0.354632		-0.636391
1161	0.0147763	0.222598	0.0727551	0.0763981	-0.0354577	0.0101239	0.00539336	0.233017		0.42818	-1.00866	0.356437		-0.685699
1162	0.0151747	0.222736	0.0725463	0.0763799	-0.0353664	0.0109589	0.00493076	0.232504		0.431697	-1.01002	0.358231		-0.652832
1163	0.0155795	0.222879	0.0723336	0.0763645	-0.035271	0.011803	0.00446107	0.231991		0.435192	-1.01135	0.360012		-0.649544
1164	0.0159909	0.223027	0.0721172	0.0763518	-0.0351712	0.0126561	0.00398433	0.231478		0.438664	-1.01265	0.36178		-0.695564
1165	0.016409	0.223179	0.071897	0.0763418	-0.0350668	0.0135179	0.00350056	0.230964		0.442113	-1.01392	0.363534		-0.698845
1166	0.016834	0.223336	0.0716732	0.0763342	-0.0349577	0.0143883	0.0030098	0.23045		0.445536	-1.01517	0.365271		-0.659409
1167	0.0172659	0.223497	0.0714457	0.0763289	-0.0348438	0.0152671	0.00251209	0.229935		0.448934	-1.01638	0.366991		-0.695564
1168	0.0177049	0.223662	0.0712147	0.0763258	-0.0347248	0.0161539	0.00200748	0.229419		0.452304	-1.01755	0.368693		-0.682411
1169	0.018151	0.223831	0.0709801	0.0763247	-0.0346007	0.0170486	0.001496	0.228901		0.455648	-1.01869	0.370375		-0.63311
1170	0.0186044	0.224004	0.0707422	0.0763254	-0.0344713	0.0179509	0.00097771	0.228381		0.458963	-1.01979	0.372036		-0.672554
1171	0.0190652	0.22418	0.0705008	0.0763278	-0.0343364	0.0188607	0.000452652	0.227859		0.462248	-1.02086	0.373675		-0.70871
1172	0.0195333	0.224359	0.0702561	0.0763317	-0.034196	0.0197775	-7.91213e-05	0.227335		0.465504	-1.02188	0.37529		-0.665977
1173	0.020009	0.224542	0.0700082	0.076337	-0.0340499	0.0207012	-0.000617554	0.226808		0.468728	-1.02286	0.376881		-0.63311
1174	0.0204922	0.224728	0.069757	0.0763434	-0.0338979	0.0216316	-0.00116258	0.226278		0.471921	-1.0238	0.378446		-0.718575
1175	0.0209831	0.224916	0.0695027	0.0763508	-0.0337401	0.0225683	-0.00171415	0.225745		0.475082	-1.0247	0.379985		-0.692276
1176	0.0214816	0.225107	0.0692453	0.076359	-0.0335761	0.0235111	-0.00227216	0.225208		0.478211	-1.02555	0.381495		-0.764587
1177	0.0219878	0.2253	0.0689848	0.076368	-0.033406	0.0244597	-0.00283656	0.224667		0.481306	-1.02636	0.382976		-0.738297
1178	0.0225018	0.225495	0.0687214	0.0763774	-0.0332297	0.0254138	-0.00340724	0.224122		0.484367	-1.02712	0.384426		-0.771164
1179	0.0230236	0.225692	0.0684551	0.0763873	-0.0330469	0.0263733	-0.00398412	0.223572		0.487395	-1.02783	0.385845		-0.705421
1180	0.0235532	0.22589	0.068186	0.0763973	-0.0328577	0.0273377	-0.00456708	0.223018		0.490388	-1.02849	0.387232		-0.784309
1181	0.0240906	0.22609	0.0679141	0.0764075	-0.032662	0.0283068	-0.00515604	0.222458		0.493346	-1.02911	0.388585		-0.75473
1182	0.0246359	0.226292	0.0676396	0.0764175	-0.0324595	0.0292804	-0.00575086	0.221893		0.496269	-1.02967	0.389903		-0.804031
1183	0.025189	0.226494	0.0673624	0.0764274	-0.0322503	0.0302581	-0.00635145	0.221322		0.499158	-1.03018	0.391185		-0.790886
1184	0.02575	0.226697	0.0670827	0.0764369	-0.0320343	0.0312396	-0.00695765	0.220745		0.502011	-1.03065	0.39243		-0.797455
1185	0.0263189	0.226901	0.0668006	0.076446	-0.0318112	0.0322247	-0.00756936	0.220162		0.504829	-1.03106	0.393638		-0.781029
1186	0.0268956	0.227105	0.066516	0.0764544	-0.0315812	0.033213	-0.00818642	0.219572		0.507612	-1.03142	0.394806		-0.90593
1187	0.0274802	0.227309	0.0662291	0.076462	-0.031344	0.0342043	-0.0088087	0.218976		0.51036	-1.03172	0.395935		-0.958519
1188	0.0280726	0.227513	0.06594	0.0764688	-0.0310996	0.0351982	-0.00943605	0.218372		0.513074	-1.03197	0.397023		-0.948662
1189	0.0286728	0.227717	0.0656487	0.0764745	-0.030848	0.0361945	-0.0100683	0.217761		0.515754	-1.03217	0.398068		-0.951942
1190	0.0292808	0.22792	0.0653553	0.076479	-0.0305889	0.0371928	-0.0107054	0.217142		0.5184	-1.03231	0.399071		-0.873054
1191	0.0298966	0.228122	0.0650599	0.0764822	-0.0303224	0.0381928	-0.011347	0.216515		0.521012	-1.0324	0.40003		-0.761307
1192	0.03052	0.228324	0.0647625	0.076484	-0.0300483	0.0391942	-0.0119931	0.215881		0.523591	-1.03244	0.400945		-0.810608
1193	0.0311512	0.228525	0.0644632	0.0764843	-0.0297666	0.0401968	-0.0126434	0.215237		0.526138	-1.03242	0.401814		-0.846756
1194	0.03179	0.228724	0.064162	0.0764829	-0.0294772	0.0412001	-0.0132978	0.214586		0.528653	-1.03234	0.402637		-0.840195
1195	0.0324365	0.228921	0.0638592	0.0764797	-0.02918	0.0422039	-0.013956	0.213925		0.531137	-1.03221	0.403412		-0.833611
1196	0.0330905	0.229117	0.0635546	0.0764746	-0.0288749	0.0432077	-0.014618	0.213255		0.53359	-1.03203	0.40414		-0.820473
1197	0.033752	0.229311	0.0632485	0.0764676	-0.0285618	0.0442114	-0.0152834	0.212576		0.536013	-1.03179	0.404819		-0.817177
1198	0.0344211	0.229502	0.0629408	0.0764585	-0.0282406	0.0452146	-0.0159521	0.211888		0.538406	-1.0315	0.405448		-0.869774
1199	0.0350976	0.229691	0.0626317	0.0764473	-0.0279113	0.0462168	-0.0166238	0.211189		0.54077	-1.03116	0.406028		-0.83033
1200	0.0357816	0.229878	0.0623211	0.0764337	-0.0275737	0.0472179	-0.0172984	0.210481		0.543106	-1.03076	0.406557		-0.853333
1201	0.0364729	0.230061	0.0620093	0.0764178	-0.0272278	0.0482173	-0.0179756	0.209763		0.545414	-1.03031	0.407035		-0.836899
1202	0.0371715	0.230241	0.0616962	0.0763995	-0.0268734	0.0492148	-0.0186551	0.209035		0.547695	-1.02981	0.407461		-0.807312
1203	0.0378774	0.230418	0.061382	0.0763786	-0.0265106	0.05021	-0.0193368	0.208296		0.549949	-1.02925	0.407835		-0.856621
1204	0.0385905	0.230592	0.0610667	0.0763551	-0.0261392	0.0512024	-0.0200203	0.207547		0.552178	-1.02865	0.408156		-0.827034
1205	0.0393107	0.230761	0.0607503	0.0763289	-0.0257591	0.0521919	-0.0207055	0.206786		0.554382	-1.02799	0.408425		-0.794174
1206	0.040038	0.230926	0.060433	0.0762998	-0.0253703	0.0531779	-0.021392	0.206015		0.556562	-1.02729	0.40864		-0.813889
1207	0.0407723	0.231087	0.0601149	0.0762678	-0.0249727	0.0541602	-0.0220796	0.205232		0.558718	-1.02653	0.408802		-0.804031
1208	0.0415136	0.231244	0.059796	0.0762328	-0.0245663	0.0551382	-0.0227681	0.204438		0.560852	-1.02573	0.408909		-0.797455
1209	0.0422617	0.231395	0.0594763	0.0761946	-0.0241511	0.0561118	-0.0234572	0.203633		0.562963	-1.02488	0.408963		-0.817177
1210	0.0430166	0.231542	0.0591561	0.0761532	-0.0237269	0.0570804	-0.0241465	0.202815		0.565053	-1.02399	0.408962		-0.761307
1211	0.0437782	0.231683	0.0588353	0.0761085	-0.0232939	0.0580437	-0.024836	0.201986		0.567121	-1.02305	0.408907		-0.827034
1212	0.0445464	0.231819	0.058514	0.0760604	-0.0228519	0.0590014	-0.0255252	0.201144		0.569169	-1.02206	0.408797		-0.850052
1213	0.0453211	0.231949	0.0581923	0.0760088	-0.022401	0.0599531	-0.0262139	0.200291		0.571198	-1.02103	0.408633		-0.800751
1214	0.0461021	0.232072	0.0578702	0.0759536	-0.0219412	0.0608984	-0.0269018	0.199425		0.573207	-1.01996	0.408414		-0.807312
1215	0.0468893	0.23219	0.0575479	0.0758947	-0.0214726	0.0618369	-0.0275887	0.198546		0.575197	-1.01885	0.40814		-0.777733
1216	0.0476828	0.232301	0.0572255	0.075832	-0.0209952	0.0627683	-0.0282744	0.197655		0.577168	-1.0177	0.407812		-0.853333
1217	0.0484822	0.232406	0.0569029	0.0757655	-0.020509	0.0636923	-0.0289584	0.196751		0.579121	-1.01652	0.407429		-0.827034
1218	0.0492874	0.232503	0.0565803	0.0756951	-0.0200141	0.0646084	-0.0296407	0.195834		0.581055	-1.01529	0.406993		-0.767868
1219	0.0500984	0.232593	0.0562577	0.0756208	-0.0195107	0.0655164	-0.0303209	0.194905		0.582972	-1.01404	0.406502		-0.820473
1220	0.050915	0.232676	0.0559352	0.0755425	-0.0189987	0.0664159	-0.0309987	0.193963		0.58487	-1.01275	0.405958		-0.78759
1221	0.051737	0.232752	0.0556129	0.0754602	-0.0184783	0.0673065	-0.031674	0.193008		0.58675	-1.01142	0.40536		-0.797455
1222	0.0525643	0.232819	0.0552908	0.0753738	-0.0179495	0.068188	-0.0323463	0.19204		0.588613	-1.01007	0.404709		-0.827034
1223	0.0533967	0.232879	0.0549691	0.0752833	-0.0174127	0.0690599	-0.0330156	0.19106		0.590456	-1.00869	0.404006		-0.75473
1224	0.054234	0.23293	0.0546476	0.0751886	-0.0168677	0.0699221	-0.0336814	0.190067		0.592282	-1.00728	0.40325		-0.800751
1225	0.055076	0.232973	0.0543266	0.0750899	-0.0163149	0.0707741	-0.0343437	0.189061		0.594088	-1.00584	0.402444		-0.764587
1226	0.0559227	0.233007	0.0540061	0.074987	-0.0157544	0.0716158	-0.035002	0.188042		0.595876	-1.00439	0.401586		-0.761307
1227	0.0567737	0.233032	0.0536861	0.0748799	-0.0151864	0.0724468	-0.0356563	0.187011		0.597644	-1.00291	0.400677		-0.797455
1228	0.0576289	0.233049	0.0533667	0.0747687	-0.0146109	0.0732668	-0.0363062	0.185967		0.599392	-1.00141	0.39972		-0.790886
1229	0.0584881	0.233056	0.0530479	0.0746533	-0.0140284	0.0740756	-0.0369515	0.184911		0.601119	-0.999894	0.398713		-0.784309
1230	0.059351	0.233053	0.0527298	0.0745339	-0.0134388	0.0748728	-0.037592	0.183843		0.602826	-0.998363	0.397658		-0.833611
1231	0.0602175	0.233042	0.0524124	0.0744104	-0.0128426	0.0756583	-0.0382275	0.182762		0.604511	-0.996817	0.396555		-0.869774
1232	0.0610873	0.23302	0.0520958	0.0742828	-0.0122399	0.0764319	-0.0388577	0.181669		0.606173	-0.995259	0.395407		-0.827034
1233	0.0619602	0.232988	0.05178	0.0741511	-0.011631	0.0771932	-0.0394825	0.180565		0.607813	-0.993691	0.394212		-0.850052
1234	0.0628359	0.232946	0.0514651	0.0740155	-0.0110161	0.0779421	-0.0401016	0.179448		0.609428	-0.992115	0.392973		-0.820473
1235	0.0637142	0.232895	0.051151	0.073876	-0.0103956	0.0786784	-0.0407148	0.17832		0.61102	-0.990532	0.39169		-0.859909
1236	0.064595	0.232832	0.0508378	0.0737325	-0.00976959	0.0794018	-0.041322	0.177181		0.612585	-0.988945	0.390365		-0.938797
1237	0.0654778	0.232759	0.0505256	0.0735851	-0.00913852	0.0801123	-0.0419229	0.17603		0.614125	-0.987356	0.388999		-0.965096
1238	0.0663625	0.232676	0.0502144	0.0734339	-0.00850264	0.0808096	-0.0425173	0.174868		0.615638	-0.985767	0.387593		-0.955231
1239	0.0672488	0.232582	0.0499042	0.0732789	-0.00786228	0.0814936	-0.0431051	0.173696		0.617123	-0.984179	0.386147		-0.958519
1240	0.0681365	0.232477	0.049595	0.0731201	-0.00721775	0.0821641	-0.043686	0.172512		0.61858	-0.982595	0.384664		-0.92894
1241	0.0690253	0.232361	0.0492869	0.0729576	-0.00656939	0.0828211	-0.0442599	0.171318		0.620007	-0.981016	0.383146		-0.965096
1242	0.0699149	0.232234	0.04898	0.0727915	-0.00591754	0.0834643	-0.0448266	0.170113		0.621405	-0.979445	0.381592		-0.93222
1243	0.0708051	0.232096	0.0486742	0.0726217	-0.00526254	0.0840937	-0.045386	0.168899		0.622772	-0.977884	0.380006		-0.965096
1244	0.0716956	0.231948	0.0483695	0.0724484	-0.00460475	0.0847092	-0.0459378	0.167674		0.624109	-0.976334	0.378388		-0.919075
1245	0.0725862	0.231787	0.048066	0.0722715	-0.00394451	0.0853108	-0.0464819	0.166439		0.625414	-0.974799	0.37674		-0.965096
1246	0.0734766	0.231616	0.0477637	0.0720912	-0.00328217	0.0858983	-0.0470182	0.165195		0.626687	-0.973279	0.375064		-0.866486
1247	0.0743665	0.231434	0.0474627	0.0719074	-0.00261806	0.0864717	-0.0475465	0.163941		0.627927	-0.971776	0.373361		-0.93222
1248	0.0752558	0.23124	0.0471629	0.0717203	-0.00195253	0.087031	-0.0480667	0.162678		0.629135	-0.970294	0.371634		-0.955231
1249	0.0761441	0.231036	0.0468643	0.0715299	-0.00128592	0.0875761	-0.0485786	0.161407		0.630309	-0.968833	0.369884		-0.836899
1250	0.0770313	0.23082	0.046567	0.0713362	-0.000618548	0.0881071	-0.0490822	0.160126		0.631449	-0.967396	0.368113		-0.961807
1251	0.0779171	0.230593	0.0462709	0.0711394	4.92477e-05	0.0886238	-0.0495772	0.158837		0.632555	-0.965986	0.366322		-0.902641
1252	0.0788014	0.230355	0.0459761	0.0709394	0.000717144	0.0891264	-0.0500637	0.15754		0.633627	-0.964602	0.364515		-0.856621
1253	0.0796838	0.230106	0.0456826	0.0707364	0.00138482	0.0896147	-0.0505414	0.156235		0.634663	-0.963249	0.362691		-0.859909
1254	0.0805642	0.229845	0.0453902	0.0705304	0.00205196	0.0900889	-0.0510104	0.154922		0.635664	-0.961927	0.360854		-1.01768
1255	0.0814424	0.229574	0.0450991	0.0703214	0.00271825	0.0905489	-0.0514705	0.153602		0.636629	-0.960638	0.359006		-0.899353
1256	0.0823182	0.229292	0.0448092	0.0701097	0.00338339	0.0909948	-0.0519217	0.152275		0.637556	-0.959385	0.357148		-0.92894
1257	0.0831914	0.228999	0.0445204	0.0698952	0.00404707	0.0914267	-0.0523638	0.150941		0.638447	-0.958169	0.355282		-0.925652
1258	0.0840618	0.228695	0.0442328	0.069678	0.004709	0.0918444	-0.0527969	0.1496		0.6393	-0.956992	0.353411		-1.02426
1259	0.0849293	0.22838	0.0439463	0.0694582	0.00536888	0.0922482	-0.0532208	0.148253		0.640114	-0.955855	0.351536		-0.984818
1260	0.0857938	0.228054	0.0436608	0.069236	0.00602644	0.092638	-0.0536356	0.146901		0.640889	-0.95476	0.349659		-0.974953
1261	0.086655	0.227718	0.0433764	0.0690112	0.0066814	0.093014	-0.0540411	0.145542		0.641624	-0.953709	0.347782		-1.06042
1262	0.0875128	0.227371	0.0430929	0.0687842	0.00733349	0.0933762	-0.0544374	0.144179		0.642319	-0.952703	0.345907		-1.00454
1263	0.0883672	0.227014	0.0428104	0.0685549	0.00798244	0.0937246	-0.0548243	0.14281		0.642972	-0.951744	0.344037		-1.01768
1264	0.0892179	0.226646	0.0425288	0.0683234	0.00862799	0.0940595	-0.055202	0.141437		0.643583	-0.950834	0.342172		-1.10314
1265	0.0900649	0.226268	0.042248	0.06809	0.00926989	0.0943808	-0.0555703	0.14006		0.644152	-0.949974	0.340316		-1.11629
1266	0.0909081	0.225879	0.041968	0.0678545	0.00990789	0.0946887	-0.0559292	0.138679		0.644677	-0.949166	0.338469		-1.10973
1267	0.0917473	0.225481	0.0416888	0.0676173	0.0105417	0.0949834	-0.0562787	0.137294		0.645158	-0.948411	0.336635		-1.07028
1268	0.0925825	0.225072	0.0414102	0.0673783	0.0111712	0.0952649	-0.0566188	0.135906		0.645594	-0.94771	0.334813		-1.05712
1269	0.0934136	0.224653	0.0411322	0.0671377	0.0117961	0.0955334	-0.0569496	0.134516		0.645985	-0.947065	0.333007		-1.14587
1270	0.0942404	0.224225	0.0408548	0.0668956	0.0124161	0.0957891	-0.0572709	0.133123		0.64633	-0.946477	0.331219		-1.03084
1271	0.095063	0.223786	0.0405779	0.0666521	0.0130312	0.096032	-0.0575829	0.131728		0.646628	-0.945948	0.329449		-1.08671
1272	0.0958812	0.223338	0.0403014	0.0664074	0.013641	0.0962624	-0.0578854	0.130331		0.646879	-0.945478	0.3277		-1.12286
1273	0.096695	0.222881	0.0400253	0.0661615	0.0142454	0.0964805	-0.0581786	0.128933		0.647083	-0.94507	0.325973		-1.13273
1274	0.0975044	0.222413	0.0397494	0.0659145	0.0148442	0.0966864	-0.0584625	0.127535		0.647239	-0.944722	0.324271		-1.07028
1275	0.0983093	0.221937	0.0394738	0.0656667	0.0154373	0.0968803	-0.0587372	0.126135		0.647346	-0.944438	0.322594		-1.10314
1276	0.0991096	0.221451	0.0391983	0.065418	0.0160246	0.0970624	-0.0590025	0.124735		0.647405	-0.944218	0.320944		-1.15574
1277	0.0999054	0.220957	0.0389229	0.0651687	0.0166058	0.097233	-0.0592587	0.123336		0.647415	-0.944063	0.319323		-1.17217
1278	0.100697	0.220453	0.0386474	0.0649188	0.0171808	0.0973923	-0.0595058	0.121937		0.647376	-0.943973	0.317732		-1.25435
1279	0.101483	0.21994	0.0383718	0.0646684	0.0177496	0.0975405	-0.0597439	0.120539		0.647287	-0.94395	0.316173		-1.21819
1280	0.102265	0.219419	0.0380961	0.0644176	0.0183119	0.0976778	-0.059973	0.119142		0.647148	-0.943994	0.314648		-1.26749
1281	0.103043	0.21889	0.03782	0.0641666	0.0188678	0.0978045	-0.0601933	0.117747		0.646959	-0.944105	0.313156		-1.16231
1282	0.103815	0.218352	0.0375436	0.0639155	0.019417	0.097921	-0.0604048	0.116354		0.64672	-0.944285	0.311701		-1.28065
1283	0.104583	0.217806	0.0372668	0.0636644	0.0199596	0.0980273	-0.0606077	0.114963		0.646431	-0.944535	0.310283		-1.24449
1284	0.105347	0.217252	0.0369894	0.0634134	0.0204954	0.098124	-0.0608021	0.113575		0.646091	-0.944853	0.308903		-1.31023
1285	0.106105	0.21669	0.0367115	0.0631626	0.0210244	0.0982111	-0.060988	0.11219		0.645701	-0.945241	0.307563		-1.33981
1286	0.10686	0.21612	0.0364328	0.0629121	0.0215464	0.098289	-0.0611658	0.110808		0.645261	-0.945699	0.306264		-1.3924
1287	0.107609	0.215543	0.0361533	0.0626621	0.0220615	0.0983581	-0.0613353	0.10943		0.64477	-0.946226	0.305007		-1.38583
1288	0.108354	0.214959	0.035873	0.0624126	0.0225696	0.0984185	-0.0614969	0.108057		0.644229	-0.946823	0.303793		-1.47458
1289	0.109094	0.214367	0.0355917	0.0621638	0.0230707	0.0984707	-0.0616507	0.106687		0.643637	-0.947488	0.302623		-1.45157
1290	0.10983	0.213769	0.0353094	0.0619157	0.0235646	0.0985148	-0.0617967	0.105323		0.642996	-0.948223	0.301498		-1.46143
1291	0.110561	0.213163	0.0350259	0.0616685	0.0240514	0.0985513	-0.0619351	0.103964		0.642305	-0.949026	0.30042		-1.43185
1292	0.111288	0.212552	0.0347412	0.0614222	0.0245312	0.0985805	-0.0620661	0.102611		0.641564	-0.949897	0.299388		-1.47129
1293	0.11201	0.211934	0.0344553	0.0611769	0.0250037	0.0986027	-0.0621898	0.101264		0.640775	-0.950835	0.298404		-1.50416
1294	0.112728	0.21131	0.0341679	0.0609328	0.0254691	0.0986181	-0.0623065	0.0999227		0.639937	-0.951839	0.297469		-1.50087
1295	0.113441	0.21068	0.0338791	0.0606898	0.0259274	0.0986272	-0.0624161	0.0985884		0.639051	-0.952909	0.296583		-1.48115
1296	0.11415	0.210044	0.0335888	0.0604481	0.0263785	0.0986303	-0.0625191	0.0972611		0.638119	-0.954043	0.295747		-1.468
1297	0.114855	0.209403	0.0332967	0.0602077	0.0268225	0.0986277	-0.0626154	0.0959412		0.637141	-0.955239	0.294962		-1.56332
1298	0.115556	0.208756	0.033003	0.0599687	0.0272593	0.0986198	-0.0627052	0.0946289		0.636117	-0.956498	0.294227		-1.60934
1299	0.116253	0.208105	0.0327074	0.0597312	0.0276891	0.098607	-0.0627889	0.0933247		0.635049	-0.957817	0.293544		-1.60605
1300	0.116946	0.207448	0.03241	0.0594953	0.0281117	0.0985896	-0.0628664	0.0920288		0.633938	-0.959196	0.292912		-1.4943
1301	0.117634	0.206788	0.0321105	0.0592609	0.0285273	0.098568	-0.0629381	0.0907416		0.632785	-0.960631	0.292332		-1.5699
1302	0.118319	0.206122	0.0318091	0.0590281	0.0289358	0.0985426	-0.0630042	0.0894633		0.63159	-0.962122	0.291803		-1.59619
1303	0.119	0.205453	0.0315054	0.0587971	0.0293373	0.0985137	-0.0630647	0.0881942		0.630356	-0.963668	0.291327		-1.57318
1304	0.119677	0.20478	0.0311996	0.0585678	0.0297318	0.0984818	-0.06312	0.0869346		0.629082	-0.965265	0.290902		-1.58962
1305	0.12035	0.204103	0.0308915	0.0583402	0.0301192	0.0984472	-0.0631703	0.0856849		0.627771	-0.966911	0.290529		-1.63564
1306	0.121019	0.203423	0.0305809	0.0581144	0.0304996	0.0984103	-0.0632157	0.0844451		0.626422	-0.968605	0.290207		-1.53703
1307	0.121685	0.20274	0.030268	0.0578904	0.0308731	0.0983716	-0.0632565	0.0832157		0.625038	-0.970345	0.289936		-1.58633
1308	0.122347	0.202053	0.0299525	0.0576683	0.0312395	0.0983313	-0.0632928	0.0819967		0.62362	-0.972127	0.289715		-1.61263
1309	0.123006	0.201365	0.0296344	0.057448	0.0315991	0.09829	-0.063325	0.0807884		0.622168	-0.973949	0.289543		-1.56004
1310	0.123661	0.200674	0.0293136	0.0572295	0.0319517	0.098248	-0.0633531	0.079591		0.620684	-0.975809	0.289421		-1.57318
1311	0.124312	0.19998	0.02899	0.0570128	0.0322974	0.0982057	-0.0633775	0.0784047		0.619169	-0.977703	0.289346		-1.53374
1312	0.12496	0.199285	0.0286637	0.0567979	0.0326362	0.0981635	-0.0633982	0.0772295		0.617624	-0.97963	0.289319		-1.52388
1313	0.125604	0.198589	0.0283344	0.0565849	0.0329681	0.0981218	-0.0634155	0.0760657		0.61605	-0.981587	0.289339		-1.5173
1314	0.126245	0.197891	0.0280022	0.0563736	0.0332933	0.0980812	-0.0634296	0.0749134		0.614448	-0.98357	0.289403		-1.54688
1315	0.126883	0.197193	0.027667	0.056164	0.0336116	0.0980418	-0.0634406	0.0737727		0.612821	-0.985577	0.289512		-1.47458
1316	0.127517	0.196493	0.0273288	0.0559562	0.0339231	0.0980043	-0.0634489	0.0726436		0.611168	-0.987604	0.289664		-1.58305
1317	0.128148	0.195794	0.0269874	0.05575	0.0342279	0.0979689	-0.0634544	0.0715262		0.609491	-0.98965	0.289858		-1.55675
1318	0.128776	0.195094	0.0266428	0.0555454	0.034526	0.0979362	-0.0634574	0.0704207		0.607791	-0.991711	0.290093		-1.5699
1319	0.129401	0.194394	0.026295	0.0553424	0.0348174	0.0979064	-0.0634582	0.069327		0.60607	-0.993785	0.290368		-1.58962
1320	0.130023	0.193695	0.0259438	0.055141	0.0351021	0.0978801	-0.0634568	0.0682451		0.604328	-0.995868	0.29068		-1.58633
1321	0.130641	0.192997	0.0255894	0.0549409	0.0353802	0.0978577	-0.0634534	0.0671751		0.602568	-0.997957	0.29103		-1.60934
1322	0.131256	0.1923	0.0252315	0.0547423	0.0356516	0.0978394	-0.0634482	0.066117		0.60079	-1.00005	0.291415		-1.61263
1323	0.131869	0.191604	0.0248703	0.054545	0.0359166	0.0978258	-0.0634414	0.0650706		0.598996	-1.00214	0.291835		-1.6192
1324	0.132478	0.190911	0.0245055	0.0543489	0.036175	0.0978173	-0.063433	0.064036		0.597186	-1.00423	0.292288		-1.66193
1325	0.133084	0.190219	0.0241372	0.0541539	0.0364268	0.0978142	-0.0634233	0.063013		0.595362	-1.00632	0.292772		-1.65865
1326	0.133687	0.189529	0.0237654	0.05396	0.0366723	0.097817	-0.0634122	0.0620016		0.593526	-1.0084	0.293287		-1.71124
1327	0.134286	0.188843	0.0233899	0.0537671	0.0369112	0.097826	-0.0634001	0.0610016		0.591678	-1.01047	0.293832		-1.72767
1328	0.134883	0.188159	0.0230108	0.0535751	0.0371438	0.0978415	-0.063387	0.0600129		0.589819	-1.01252	0.294404		-1.70138
1329	0.135477	0.187479	0.0226281	0.0533838	0.03737	0.0978641	-0.063373	0.0590353		0.587952	-1.01456	0.295002		-1.67179
1330	0.136067	0.186803	0.0222416	0.0531931	0.0375899	0.097894	-0.0633581	0.0580687		0.586076	-1.01658	0.295626		-1.6948
1331	0.136654	0.18613	0.0218515	0.0530031	0.0378036	0.0979315	-0.0633427	0.0571127		0.584194	-1.01858	0.296274		-1.61591
1332	0.137238	0.185462	0.0214576	0.0528135	0.038011	0.097977	-0.0633266	0.0561673		0.582307	-1.02056	0.296944		-1.70138
1333	0.137819	0.184798	0.0210599	0.0526242	0.0382122	0.0980308	-0.0633102	0.0552322		0.580415	-1.02251	0.297636		-1.68166
1334	0.138396	0.18414	0.0206585	0.0524351	0.0384073	0.0980932	-0.0632933	0.0543072		0.57852	-1.02443	0.298348		-1.70138
1335	0.13897	0.183486	0.0202533	0.0522461	0.0385963	0.0981646	-0.0632762	0.0533919		0.576623	-1.02632	0.299079		-1.63892
1336	0.139541	0.182838	0.0198443	0.0520571	0.0387792	0.0982451	-0.063259	0.0524861		0.574725	-1.02818	0.299827		-1.66522
1337	0.140108	0.182196	0.0194315	0.0518679	0.0389563	0.0983351	-0.0632416	0.0515895		0.572827	-1.03001	0.300592		-1.62577
1338	0.140672	0.18156	0.019015	0.0516784	0.0391274	0.0984347	-0.0632243	0.0507018		0.570931	-1.0318	0.301372		-1.66193
1339	0.141233	0.18093	0.0185946	0.0514885	0.0392926	0.0985443	-0.0632071	0.0498227		0.569037	-1.03355	0.302165		-1.67837
1340	0.141789	0.180307	0.0181705	0.0512981	0.0394521	0.0986641	-0.0631901	0.0489518		0.567147	-1.03526	0.302972		-1.64221
1341	0.142343	0.17969	0.0177427	0.0511069	0.0396058	0.0987942	-0.0631734	0.0480889		0.565263	-1.03693	0.303789		-1.5929
1342	0.142892	0.179081	0.0173111	0.050915	0.0397539	0.0989348	-0.063157	0.0472336		0.563384	-1.03856	0.304617		-1.63235
1343	0.143438	0.178479	0.0168758	0.0507221	0.0398964	0.0990862	-0.063141	0.0463855		0.561512	-1.04015	0.305454		-1.70467
1344	0.14398	0.177884	0.0164368	0.0505282	0.0400335	0.0992484	-0.0631256	0.0455442		0.559649	-1.04168	0.306299		-1.67837
1345	0.144518	0.177297	0.0159941	0.0503331	0.0401651	0.0994217	-0.0631108	0.0447095		0.557796	-1.04318	0.30715		-1.70795
1346	0.145052	0.176719	0.0155478	0.0501367	0.0402913	0.099606	-0.0630966	0.043881		0.555952	-1.04462	0.308007		-1.72439
1347	0.145582	0.176148	0.0150978	0.0499389	0.0404124	0.0998016	-0.0630832	0.0430583		0.554121	-1.04601	0.308868		-1.76711
1348	0.146108	0.175586	0.0146443	0.0497396	0.0405284	0.100009	-0.0630707	0.0422409		0.552301	-1.04736	0.309732		-1.66193
1349	0.14663	0.175033	0.0141872	0.0495386	0.0406394	0.100227	-0.0630591	0.0414286		0.550495	-1.04865	0.310598		-1.71781
1350	0.147148	0.174488	0.0137266	0.0493359	0.0407455	0.100457	-0.0630484	0.0406209		0.548703	-1.04989	0.311466		-1.71124
1351	0.147661	0.173952	0.0132625	0.0491312	0.0408469	0.100698	-0.0630389	0.0398175		0.546926	-1.05108	0.312334		-1.75397
1352	0.148171	0.173426	0.012795	0.0489245	0.0409438	0.100951	-0.0630305	0.0390179		0.545164	-1.05221	0.3132		-1.77369
1353	0.148676	0.172909	0.012324	0.0487157	0.0410362	0.101215	-0.0630232	0.0382217		0.543418	-1.05329	0.314065		-1.75069
1354	0.149177	0.172401	0.0118497	0.0485046	0.0411245	0.101491	-0.0630172	0.0374287		0.54169	-1.05432	0.314927		-1.76383
1355	0.149674	0.171903	0.0113721	0.0482912	0.0412086	0.101779	-0.0630125	0.0366383		0.539978	-1.05528	0.315785		-1.77369
1356	0.150166	0.171414	0.0108912	0.0480754	0.0412889	0.102078	-0.0630091	0.0358503		0.538284	-1.0562	0.316639		-1.80656
1357	0.150654	0.170935	0.0104071	0.0478569	0.0413654	0.102388	-0.0630071	0.0350643		0.536608	-1.05705	0.317487		-1.79013
1358	0.151138	0.170467	0.00991979	0.0476358	0.0414385	0.10271	-0.0630064	0.03428		0.53495	-1.05786	0.318329		-1.77697
1359	0.151618	0.170008	0.00942937	0.047412	0.0415082	0.103043	-0.0630071	0.033497		0.53331	-1.0586	0.319164		-1.75725
1360	0.152093	0.16956	0.00893588	0.0471853	0.0415748	0.103387	-0.0630093	0.032715		0.53169	-1.05929	0.319991		-1.78683
1361	0.152564	0.169121	0.00843934	0.0469558	0.0416385	0.103742	-0.0630129	0.0319338		0.530088	-1.05993	0.320809		-1.83286
1362	0.153031	0.168693	0.00793981	0.0467232	0.0416995	0.104109	-0.063018	0.0311531		0.528505	-1.06051	0.321618		-1.85258
1363	0.153493	0.168276	0.00743732	0.0464875	0.041758	0.104486	-0.0630246	0.0303725		0.52694	-1.06103	0.322417		-1.78355
1364	0.153951	0.167869	0.00693192	0.0462488	0.0418144	0.104874	-0.0630328	0.029592		0.525395	-1.06151	0.323205		-1.76054
1365	0.154405	0.167472	0.00642365	0.0460068	0.0418686	0.105272	-0.0630426	0.0288111		0.523869	-1.06193	0.323981		-1.72767
1366	0.154855	0.167086	0.00591254	0.0457616	0.0419211	0.105681	-0.063054	0.0280299		0.522362	-1.0623	0.324745		-1.81313
1367	0.155301	0.16671	0.00539862	0.0455131	0.0419721	0.1061	-0.0630669	0.0272479		0.520874	-1.06262	0.325497		-1.81971
1368	0.155742	0.166345	0.00488191	0.0452612	0.0420217	0.106529	-0.0630816	0.0264651		0.519406	-1.06289	0.326235		-1.80327
1369	0.15618	0.16599	0.00436245	0.045006	0.0420702	0.106968	-0.0630979	0.0256814		0.517958	-1.06311	0.32696		-1.76711
1370	0.156614	0.165645	0.00384025	0.0447474	0.0421178	0.107417	-0.063116	0.0248964		0.516529	-1.06329	0.32767		-1.71781
1371	0.157043	0.165311	0.00331533	0.0444853	0.0421649	0.107875	-0.0631358	0.0241102		0.51512	-1.06343	0.328365		-1.76054
1372	0.157469	0.164988	0.0027877	0.0442198	0.0422115	0.108342	-0.0631574	0.0233225		0.513732	-1.06352	0.329044		-1.83286
1373	0.157891	0.164675	0.00225737	0.0439508	0.042258	0.108818	-0.0631808	0.0225332		0.512363	-1.06357	0.329708		-1.76054
1374	0.15831	0.164372	0.00172436	0.0436783	0.0423047	0.109302	-0.063206	0.0217423		0.511015	-1.06359	0.330356		-1.83286
1375	0.158725	0.164079	0.00118868	0.0434023	0.0423517	0.109795	-0.063233	0.0209497		0.509688	-1.06356	0.330987		-1.85587
1376	0.159136	0.163796	0.000650311	0.0431228	0.0423993	0.110296	-0.0632619	0.0201552		0.508381	-1.06351	0.331601		-1.81971
1377	0.159543	0.163523	0.000109267	0.0428399	0.0424478	0.110805	-0.0632927	0.0193588		0.507094	-1.06342	0.332198		-1.6948
1378	0.159948	0.16326	-0.000434464	0.0425534	0.0424974	0.111321	-0.0633254	0.0185604		0.505829	-1.0633	0.332777		-1.6455
1379	0.160348	0.163007	-0.000980891	0.0422634	0.0425484	0.111845	-0.06336	0.0177601		0.504585	-1.06316	0.333339		-1.69151
1380	0.160746	0.162763	-0.00153003	0.0419699	0.042601	0.112375	-0.0633966	0.0169577		0.503362	-1.06299	0.333883		-1.61263
1381	0.16114	0.162528	-0.00208189	0.041673	0.0426554	0.112913	-0.0634352	0.0161533		0.50216	-1.0628	0.334409		-1.64221
1382	0.161532	0.162303	-0.00263649	0.0413725	0.042712	0.113456	-0.0634757	0.0153468		0.50098	-1.06259	0.334917		-1.60605
1383	0.16192	0.162087	-0.00319385	0.0410687	0.0427709	0.114005	-0.0635183	0.0145382		0.499821	-1.06236	0.335407		-1.56004
1384	0.162305	0.16188	-0.00375399	0.0407614	0.0428324	0.114561	-0.0635629	0.0137274		0.498685	-1.06211	0.335879		-1.60605
1385	0.162688	0.161681	-0.00431694	0.0404507	0.0428967	0.115121	-0.0636095	0.0129145		0.497571	-1.06186	0.336333		-1.61591
1386	0.163067	0.16149	-0.00488273	0.0401365	0.042964	0.115686	-0.0636583	0.0120995		0.49648	-1.06159	0.336769		-1.54032
1387	0.163444	0.161308	-0.00545137	0.039819	0.0430346	0.116256	-0.0637091	0.0112822		0.495412	-1.06132	0.337187		-1.57318
1388	0.163819	0.161134	-0.00602291	0.0394982	0.0431086	0.116831	-0.0637621	0.0104628		0.494367	-1.06104	0.337587		-1.58305
1389	0.16419	0.160968	-0.00659736	0.039174	0.0431862	0.117409	-0.0638173	0.00964114		0.493347	-1.06076	0.33797		-1.5929
1390	0.164559	0.160809	-0.00717478	0.0388464	0.0432677	0.117991	-0.0638747	0.00881726		0.492351	-1.06048	0.338336		-1.51402
1391	0.164926	0.160657	-0.00775519	0.0385156	0.0433532	0.118577	-0.0639344	0.00799114		0.49138	-1.06021	0.338685		-1.50744
1392	0.165291	0.160513	-0.00833864	0.0381815	0.0434429	0.119165	-0.0639963	0.00716274		0.490435	-1.05994	0.339018		-1.48772
1393	0.165653	0.160375	-0.00892516	0.037844	0.043537	0.119756	-0.0640606	0.00633203		0.489516	-1.05968	0.339335		-1.48772
1394	0.166013	0.160243	-0.0095148	0.0375033	0.0436356	0.120349	-0.0641273	0.00549899		0.488624	-1.05943	0.339636		-1.55018
1395	0.16637	0.160118	-0.0101076	0.0371592	0.043739	0.120944	-0.0641964	0.00466357		0.487759	-1.05919	0.339922		-1.49758
1396	0.166726	0.159999	-0.0107036	0.0368119	0.0438471	0.12154	-0.0642679	0.00382574		0.486923	-1.05897	0.340194		-1.56004
1397	0.16708	0.159885	-0.0113029	0.0364613	0.0439602	0.122138	-0.064342	0.00298546		0.486116	-1.05877	0.340451		-1.41212
1398	0.167431	0.159777	-0.0119054	0.0361074	0.0440785	0.122736	-0.0644185	0.00214268		0.485338	-1.05859	0.340694		-1.51073
1399	0.167781	0.159673	-0.0125114	0.0357502	0.0442019	0.123335	-0.0644976	0.00129735		0.484591	-1.05843	0.340924		-1.53046
1400	0.168129	0.159575	-0.0131206	0.0353898	0.0443306	0.123934	-0.0645794	0.000449436		0.483875	-1.05831	0.341142		-1.50744
1401	0.168475	0.15948	-0.0137333	0.035026	0.0444647	0.124533	-0.0646637	-0.000401117		0.483192	-1.05821	0.341348		-1.43513
1402	0.168819	0.15939	-0.0143495	0.0346589	0.0446044	0.12513	-0.0647507	-0.00125436		0.482541	-1.05814	0.341542		-1.47786
1403	0.169161	0.159304	-0.0149692	0.0342886	0.0447496	0.125727	-0.0648404	-0.00211033		0.481924	-1.05811	0.341726		-1.48772
1404	0.169502	0.159221	-0.0155923	0.0339149	0.0449004	0.126322	-0.0649328	-0.00296909		0.481342	-1.05811	0.341899		-1.44499
1405	0.169841	0.159141	-0.016219	0.033538	0.0450569	0.126916	-0.0650278	-0.00383068		0.480796	-1.05816	0.342063		-1.43185
1406	0.170179	0.159063	-0.0168493	0.0331578	0.0452192	0.127507	-0.0651256	-0.00469515		0.480287	-1.05824	0.342219		-1.40226
1407	0.170514	0.158989	-0.0174832	0.0327744	0.0453872	0.128096	-0.0652262	-0.00556254		0.479815	-1.05838	0.342366		-1.44828
1408	0.170848	0.158916	-0.0181206	0.0323877	0.045561	0.128681	-0.0653294	-0.00643291		0.479381	-1.05855	0.342506		-1.41869
1409	0.171181	0.158845	-0.0187616	0.0319978	0.0457407	0.129263	-0.0654354	-0.00730629		0.478987	-1.05878	0.342639		-1.45814
1410	0.171512	0.158776	-0.0194063	0.0316047	0.0459261	0.129842	-0.0655441	-0.00818275		0.478633	-1.05906	0.342766		-1.50744
1411	0.171842	0.158708	-0.0200545	0.0312084	0.0461174	0.130416	-0.0656554	-0.00906233		0.47832	-1.05939	0.342888		-1.56004
1412	0.172169	0.158641	-0.0207064	0.030809	0.0463145	0.130985	-0.0657695	-0.0099451		0.478049	-1.05977	0.343006		-1.56004
1413	0.172496	0.158574	-0.0213619	0.0304064	0.0465174	0.13155	-0.0658863	-0.0108311		0.47782	-1.06022	0.34312		-1.53374
1414	0.17282	0.158508	-0.0220211	0.0300007	0.0467261	0.13211	-0.0660057	-0.0117204		0.477635	-1.06072	0.34323		-1.46471
1415	0.173143	0.158442	-0.0226838	0.029592	0.0469405	0.132664	-0.0661278	-0.0126131		0.477493	-1.06129	0.343338		-1.4943
1416	0.173465	0.158375	-0.0233501	0.0291802	0.0471607	0.133212	-0.0662524	-0.0135092		0.477395	-1.06191	0.343445		-1.52388
1417	0.173785	0.158308	-0.0240201	0.0287654	0.0473865	0.133753	-0.0663797	-0.0144089		0.477343	-1.06261	0.34355		-1.49758
1418	0.174103	0.158239	-0.0246935	0.0283477	0.047618	0.134289	-0.0665096	-0.015312		0.477335	-1.06337	0.343655		-1.52388
1419	0.174419	0.15817	-0.0253706	0.027927	0.0478552	0.134817	-0.066642	-0.0162189		0.477374	-1.0642	0.343759		-1.50416
1420	0.174734	0.158099	-0.0260512	0.0275035	0.0480978	0.135338	-0.0667769	-0.0171294		0.477459	-1.0651	0.343865		-1.5173
1421	0.175047	0.158027	-0.0267352	0.0270771	0.048346	0.135851	-0.0669142	-0.0180437		0.47759	-1.06607	0.343971		-1.53046
1422	0.175359	0.157952	-0.0274227	0.0266478	0.0485996	0.136357	-0.067054	-0.0189618		0.477769	-1.06712	0.344079		-1.51402
1423	0.175668	0.157876	-0.0281137	0.0262159	0.0488586	0.136854	-0.0671962	-0.0198839		0.477995	-1.06824	0.34419		-1.52388
1424	0.175976	0.157797	-0.028808	0.0257812	0.0491229	0.137344	-0.0673408	-0.02081		0.478269	-1.06943	0.344303		-1.51073
1425	0.176282	0.157715	-0.0295056	0.0253439	0.0493925	0.137824	-0.0674876	-0.0217402		0.478591	-1.07071	0.344419		-1.48115
1426	0.176586	0.15763	-0.0302065	0.024904	0.0496673	0.138296	-0.0676367	-0.0226745		0.47896	-1.07206	0.344538		-1.55675
1427	0.176888	0.157543	-0.0309107	0.0244614	0.0499473	0.138758	-0.0677879	-0.0236132		0.479378	-1.0735	0.344661		-1.51402
1428	0.177188	0.157452	-0.031618	0.0240164	0.0502323	0.139211	-0.0679413	-0.0245561		0.479845	-1.07501	0.344789		-1.45814
1429	0.177487	0.157357	-0.0323284	0.0235689	0.0505224	0.139655	-0.0680967	-0.0255036		0.48036	-1.07661	0.344921		-1.49101
1430	0.177783	0.157259	-0.0330419	0.0231189	0.0508175	0.140088	-0.0682541	-0.0264555		0.480923	-1.07829	0.345057		-1.49101
1431	0.178077	0.157157	-0.0337584	0.0226665	0.0511176	0.140512	-0.0684135	-0.0274121		0.481534	-1.08006	0.345199		-1.49101
1432	0.17837	0.157051	-0.0344779	0.0222119	0.0514226	0.140925	-0.0685748	-0.0283735		0.482193	-1.0819	0.345346		-1.45814
1433	0.17866	0.15694	-0.0352002	0.0217549	0.0517324	0.141328	-0.068738	-0.0293396		0.4829	-1.08384	0.345498		-1.49758
1434	0.178948	0.156825	-0.0359253	0.0212956	0.052047	0.14172	-0.0689029	-0.0303107		0.483655	-1.08585	0.345656		-1.3924
1435	0.179235	0.156706	-0.0366531	0.0208342	0.0523665	0.142102	-0.0690695	-0.0312867		0.484456	-1.08795	0.34582		-1.41869
1436	0.179519	0.156582	-0.0373836	0.0203706	0.0526907	0.142472	-0.0692377	-0.0322679		0.485304	-1.09014	0.345991		-1.44499
1437	0.179801	0.156453	-0.0381167	0.0199049	0.0530196	0.142832	-0.0694074	-0.0332542		0.486199	-1.09241	0.346167		-1.35295
1438	0.180081	0.156319	-0.0388522	0.0194371	0.0533533	0.14318	-0.0695785	-0.0342457		0.487139	-1.09477	0.34635		-1.37926
1439	0.180359	0.15618	-0.03959	0.0189674	0.0536918	0.143517	-0.069751	-0.0352426		0.488124	-1.0972	0.346539		-1.39568
1440	0.180635	0.156036	-0.0403302	0.0184958	0.0540349	0.143842	-0.0699247	-0.0362448		0.489152	-1.09973	0.346736		-1.35624
1441	0.180908	0.155887	-0.0410725	0.0180223	0.0543827	0.144156	-0.0700995	-0.0372526		0.490225	-1.10234	0.346939		-1.45157
1442	0.18118	0.155732	-0.0418169	0.017547	0.0547352	0.144457	-0.0702753	-0.0382658		0.49134	-1.10503	0.347149		-1.38254
1443	0.18145	0.155572	-0.0425632	0.01707	0.0550924	0.144748	-0.070452	-0.0392847		0.492497	-1.1078	0.347367		-1.39568
1444	0.181717	0.155406	-0.0433114	0.0165914	0.0554543	0.145026	-0.0706294	-0.0403092		0.493694	-1.11065	0.347592		-1.39568
1445	0.181982	0.155235	-0.0440613	0.0161112	0.0558209	0.145292	-0.0708075	-0.0413395		0.494931	-1.11359	0.347825		-1.37596
1446	0.182246	0.155058	-0.0448128	0.0156295	0.0561921	0.145547	-0.0709861	-0.0423755		0.496207	-1.1166	0.348066		-1.31023
1447	0.182507	0.154876	-0.0455658	0.0151464	0.0565681	0.145789	-0.071165	-0.0434174		0.497521	-1.11969	0.348314		-1.3661
1448	0.182766	0.154688	-0.0463201	0.0146619	0.0569487	0.146019	-0.0713442	-0.0444652		0.49887	-1.12286	0.348571		-1.3924
1449	0.183023	0.154494	-0.0470757	0.0141763	0.0573341	0.146238	-0.0715235	-0.0455189		0.500255	-1.1261	0.348835		-1.33652
1450	0.183278	0.154294	-0.0478324	0.0136895	0.0577242	0.146444	-0.0717028	-0.0465786		0.501673	-1.12942	0.349109		-1.26421
1451	0.183531	0.154089	-0.04859	0.0132017	0.0581191	0.146638	-0.0718818	-0.0476444		0.503124	-1.1328	0.34939		-1.42198
1452	0.183782	0.153878	-0.0493485	0.0127129	0.0585188	0.146821	-0.0720605	-0.0487161		0.504605	-1.13626	0.34968		-1.33652
1453	0.184031	0.153662	-0.0501076	0.0122232	0.0589232	0.146991	-0.0722388	-0.049794		0.506116	-1.13979	0.349979		-1.4417
1454	0.184278	0.153439	-0.0508673	0.0117328	0.0593325	0.147149	-0.0724164	-0.0508779		0.507656	-1.14339	0.350287		-1.42856
1455	0.184523	0.153211	-0.0516275	0.0112417	0.0597467	0.147296	-0.0725933	-0.051968		0.509222	-1.14704	0.350604		-1.51402
1456	0.184766	0.152978	-0.0523879	0.0107499	0.0601657	0.14743	-0.0727692	-0.0530643		0.510813	-1.15077	0.350929		-1.48444
1457	0.185007	0.152738	-0.0531485	0.0102577	0.0605897	0.147553	-0.0729441	-0.0541666		0.512427	-1.15455	0.351263		-1.51402
1458	0.185246	0.152493	-0.053909	0.00976506	0.0610186	0.147665	-0.0731177	-0.0552751		0.514064	-1.15839	0.351607		-1.43842
1459	0.185483	0.152243	-0.0546694	0.0092721	0.0614524	0.147764	-0.07329	-0.0563897		0.515722	-1.16229	0.351959		-1.48444
1460	0.185718	0.151987	-0.0554295	0.0087789	0.0618912	0.147853	-0.0734607	-0.0575104		0.517399	-1.16624	0.352321		-1.50744
1461	0.185951	0.151726	-0.0561891	0.00828556	0.0623349	0.14793	-0.0736298	-0.0586371		0.519093	-1.17024	0.352692		-1.53374
1462	0.186182	0.151459	-0.056948	0.00779216	0.0627837	0.147995	-0.073797	-0.0597699		0.520803	-1.17429	0.353072		-1.4943
1463	0.186412	0.151187	-0.0577061	0.00729878	0.0632374	0.14805	-0.0739622	-0.0609086		0.522527	-1.17839	0.353461		-1.48772
1464	0.18664	0.15091	-0.0584633	0.0068055	0.063696	0.148094	-0.0741253	-0.0620533		0.524264	-1.18253	0.353859		-1.42198
1465	0.186865	0.150628	-0.0592193	0.00631239	0.0641596	0.148126	-0.0742862	-0.0632039		0.526012	-1.18671	0.354267		-1.42856
1466	0.187089	0.150341	-0.059974	0.00581951	0.0646282	0.148149	-0.0744445	-0.0643604		0.527769	-1.19093	0.354684		-1.53703
1467	0.187311	0.150049	-0.0607272	0.00532692	0.0651017	0.14816	-0.0746003	-0.0655227		0.529534	-1.19519	0.35511		-1.5666
1468	0.187532	0.149753	-0.0614787	0.0048347	0.06558	0.148161	-0.0747533	-0.0666907		0.531305	-1.19948	0.355546		-1.47786
1469	0.18775	0.149451	-0.0622284	0.00434289	0.0660632	0.148152	-0.0749035	-0.0678646		0.53308	-1.20379	0.355991		-1.47458
1470	0.187967	0.149145	-0.062976	0.00385154	0.0665513	0.148133	-0.0750505	-0.0690441		0.534858	-1.20814	0.356446		-1.47129
1471	0.188181	0.148835	-0.0637214	0.0033607	0.0670441	0.148103	-0.0751944	-0.0702293		0.536637	-1.2125	0.35691		-1.55675
1472	0.188394	0.14852	-0.0644644	0.00287042	0.0675416	0.148064	-0.0753349	-0.07142		0.538416	-1.21689	0.357383		-1.55346
1473	0.188605	0.148201	-0.0652048	0.00238074	0.0680438	0.148016	-0.0754719	-0.0726163		0.540191	-1.22129	0.357865		-1.44499
1474	0.188814	0.147878	-0.0659425	0.00189169	0.0685505	0.147957	-0.0756052	-0.0738181		0.541963	-1.22571	0.358357		-1.40884
1475	0.189021	0.147551	-0.0666773	0.0014033	0.0690619	0.14789	-0.0757346	-0.0750254		0.543728	-1.23014	0.358858		-1.47129
1476	0.189226	0.14722	-0.0674089	0.000915606	0.0695777	0.147813	-0.0758601	-0.076238		0.545485	-1.23457	0.359369		-1.54688
1477	0.189429	0.146886	-0.0681373	0.000428625	0.0700979	0.147728	-0.0759815	-0.0774561		0.547231	-1.239	0.359889		-1.47458
1478	0.18963	0.146548	-0.0688622	-5.76216e-05	0.0706224	0.147633	-0.0760986	-0.0786795		0.548966	-1.24344	0.360418		-1.42856
1479	0.189829	0.146206	-0.0695835	-0.000543118	0.0711512	0.14753	-0.0762113	-0.0799082		0.550686	-1.24787	0.360956		-1.51073
1480	0.190026	0.145861	-0.0703009	-0.00102785	0.0716841	0.147419	-0.0763195	-0.0811422		0.552389	-1.25229	0.361503		-1.53374
1481	0.190221	0.145513	-0.0710144	-0.00151182	0.072221	0.147299	-0.0764231	-0.0823814		0.554074	-1.2567	0.36206		-1.46143
1482	0.190414	0.145162	-0.0717237	-0.00199502	0.0727619	0.147171	-0.0765219	-0.0836259		0.555739	-1.2611	0.362626		-1.56004
1483	0.190605	0.144808	-0.0724287	-0.00247744	0.0733067	0.147036	-0.0766158	-0.0848756		0.55738	-1.26548	0.3632		-1.5436
1484	0.190793	0.144451	-0.0731293	-0.00295909	0.0738552	0.146892	-0.0767047	-0.0861304		0.558996	-1.26983	0.363784		-1.50744
1485	0.19098	0.144092	-0.0738252	-0.00343997	0.0744074	0.146742	-0.0767884	-0.0873904		0.560585	-1.27416	0.364377		-1.53703
1486	0.191164	0.14373	-0.0745163	-0.00392008	0.0749631	0.146583	-0.076867	-0.0886554		0.562144	-1.27846	0.364979		-1.5436
1487	0.191347	0.143366	-0.0752025	-0.00439943	0.0755222	0.146418	-0.0769403	-0.0899255		0.56367	-1.28273	0.36559		-1.50744
1488	0.191527	0.142999	-0.0758836	-0.00487803	0.0760847	0.146246	-0.0770082	-0.0912006		0.565162	-1.28696	0.366209		-1.57976
1489	0.191705	0.142631	-0.0765595	-0.00535589	0.0766504	0.146066	-0.0770706	-0.0924805		0.566618	-1.29114	0.366837		-1.5929
1490	0.191881	0.14226	-0.07723	-0.00583301	0.0772193	0.145881	-0.0771274	-0.0937653		0.568033	-1.29529	0.367474		-1.54688
1491	0.192055	0.141888	-0.077895	-0.00630942	0.0777911	0.145688	-0.0771786	-0.0950549		0.569408	-1.29938	0.36812		-1.55346
1492	0.192226	0.141514	-0.0785543	-0.00678513	0.0783658	0.14549	-0.0772241	-0.0963492		0.570738	-1.30343	0.368773		-1.58633
1493	0.192395	0.141138	-0.0792079	-0.00726015	0.0789432	0.145285	-0.0772639	-0.097648		0.572023	-1.30742	0.369436		-1.5666
1494	0.192562	0.14076	-0.0798554	-0.0077345	0.0795233	0.145075	-0.0772978	-0.0989513		0.573259	-1.31135	0.370107		-1.52059
1495	0.192727	0.140382	-0.080497	-0.00820819	0.080106	0.144858	-0.0773259	-0.100259		0.574444	-1.31521	0.370786		-1.59619
1496	0.19289	0.140001	-0.0811323	-0.00868123	0.0806911	0.144636	-0.077348	-0.101571		0.575576	-1.31902	0.371473		-1.55346
1497	0.19305	0.13962	-0.0817613	-0.00915364	0.0812786	0.144409	-0.0773642	-0.102887		0.576653	-1.32275	0.372168		-1.62907
1498	0.193208	0.139237	-0.0823838	-0.00962545	0.0818683	0.144176	-0.0773744	-0.104207		0.577672	-1.32641	0.372871		-1.59619
1499	0.193364	0.138854	-0.0829998	-0.0100967	0.0824602	0.143938	-0.0773786	-0.105531		0.578632	-1.33	0.373582		-1.63892
1500	0.193518	0.138469	-0.083609	-0.0105673	0.0830541	0.143695	-0.0773767	-0.106859		0.579531	-1.33351	0.374301		-1.58962
1501	0.19367	0.138083	-0.0842115	-0.0110374	0.08365	0.143447	-0.0773687	-0.10819		0.580366	-1.33693	0.375028		-1.60605
1502	0.193819	0.137697	-0.084807	-0.0115069	0.0842479	0.143194	-0.0773547	-0.109525		0.581136	-1.34027	0.375762		-1.61263
1503	0.193967	0.137309	-0.0853956	-0.0119758	0.0848476	0.142937	-0.0773346	-0.110863		0.581839	-1.34353	0.376504		-1.57318
1504	0.194112	0.136921	-0.0859771	-0.0124443	0.0854491	0.142675	-0.0773084	-0.112204		0.582473	-1.34669	0.377253		-1.59619
1505	0.194256	0.136531	-0.0865514	-0.0129122	0.0860523	0.142408	-0.0772762	-0.113548		0.583036	-1.34975	0.378009		-1.63892
1506	0.194397	0.136141	-0.0871184	-0.0133796	0.0866573	0.142137	-0.0772379	-0.114895		0.583527	-1.35272	0.378773		-1.65865
1507	0.194537	0.135751	-0.0876781	-0.0138466	0.0872638	0.141862	-0.0771937	-0.116245		0.583944	-1.3556	0.379543		-1.62249
1508	0.194675	0.135359	-0.0882304	-0.0143131	0.087872	0.141582	-0.0771435	-0.117598		0.584286	-1.35836	0.38032		-1.56332
1509	0.194812	0.134967	-0.0887753	-0.0147791	0.0884818	0.141299	-0.0770874	-0.118952		0.584551	-1.36103	0.381104		-1.57976
1510	0.194946	0.134573	-0.0893127	-0.0152447	0.089093	0.141011	-0.0770254	-0.120309		0.584738	-1.36358	0.381894		-1.48444
1511	0.195079	0.13418	-0.0898425	-0.0157099	0.0897057	0.14072	-0.0769577	-0.121668		0.584846	-1.36603	0.382691		-1.57976
1512	0.195211	0.133785	-0.0903647	-0.0161746	0.0903199	0.140425	-0.0768842	-0.123029		0.584873	-1.36837	0.383493		-1.60605
1513	0.19534	0.13339	-0.0908793	-0.016639	0.0909355	0.140126	-0.0768051	-0.124392		0.58482	-1.37059	0.384302		-1.57647
1514	0.195469	0.132994	-0.0913863	-0.0171031	0.0915525	0.139824	-0.0767204	-0.125756		0.584684	-1.37269	0.385115		-1.62577
1515	0.195596	0.132598	-0.0918856	-0.0175668	0.0921709	0.139519	-0.0766302	-0.127122		0.584465	-1.37467	0.385934		-1.65865
1516	0.195722	0.132201	-0.0923772	-0.0180302	0.0927907	0.13921	-0.0765345	-0.128489		0.584162	-1.37654	0.386758		-1.66522
1517	0.195846	0.131803	-0.0928611	-0.0184933	0.0934117	0.138898	-0.0764335	-0.129857		0.583776	-1.37828	0.387586		-1.73425
1518	0.195969	0.131405	-0.0933372	-0.0189562	0.0940341	0.138583	-0.0763273	-0.131227		0.583305	-1.3799	0.388419		-1.79669
1519	0.196091	0.131006	-0.0938057	-0.0194188	0.0946578	0.138265	-0.0762159	-0.132597		0.582748	-1.38139	0.389255		-1.69151
1520	0.196212	0.130607	-0.0942664	-0.0198811	0.0952828	0.137945	-0.0760994	-0.133968		0.582107	-1.38276	0.390096		-1.67837
1521	0.196332	0.130207	-0.0947194	-0.0203433	0.0959091	0.137621	-0.075978	-0.135339		0.58138	-1.384	0.390939		-1.7211
1522	0.196451	0.129806	-0.0951647	-0.0208053	0.0965367	0.137296	-0.0758518	-0.136711		0.580567	-1.3851	0.391786		-1.6685
1523	0.196569	0.129405	-0.0956023	-0.0212672	0.0971656	0.136967	-0.0757208	-0.138084		0.57967	-1.38608	0.392636		-1.74411
1524	0.196686	0.129003	-0.0960322	-0.0217289	0.0977957	0.136637	-0.0755852	-0.139457		0.578687	-1.38693	0.393489		-1.68822
1525	0.196803	0.1286	-0.0964545	-0.0221905	0.0984272	0.136304	-0.0754451	-0.140831		0.577619	-1.38764	0.394344		-1.71781
1526	0.196918	0.128197	-0.0968691	-0.0226521	0.0990599	0.135969	-0.0753007	-0.142204		0.576467	-1.38823	0.395202		-1.80656
1527	0.197033	0.127794	-0.0972762	-0.0231135	0.0996939	0.135632	-0.075152	-0.143578		0.575231	-1.38867	0.396061		-1.80985
1528	0.197148	0.127389	-0.0976757	-0.0235749	0.100329	0.135293	-0.0749992	-0.144952		0.573912	-1.38899	0.396923		-1.79669
1529	0.197261	0.126984	-0.0980677	-0.0240363	0.100966	0.134952	-0.0748425	-0.146325		0.572509	-1.38917	0.397787		-1.83286
1530	0.197375	0.126579	-0.0984522	-0.0244975	0.101604	0.13461	-0.074682	-0.147699		0.571025	-1.38922	0.398652		-1.92489
1531	0.197488	0.126172	-0.0988294	-0.0249588	0.102243	0.134266	-0.0745177	-0.149072		0.56946	-1.38913	0.399519		-1.90517
1532	0.1976	0.125765	-0.0991992	-0.0254199	0.102883	0.133921	-0.07435	-0.150445		0.567814	-1.38891	0.400387		-1.97091
1533	0.197713	0.125357	-0.0995618	-0.0258811	0.103525	0.133574	-0.0741788	-0.151817		0.56609	-1.38856	0.401257		-1.95448
1534	0.197825	0.124949	-0.0999172	-0.0263421	0.104168	0.133226	-0.0740044	-0.153189		0.564287	-1.38807	0.402128		-1.98077
1535	0.197937	0.124539	-0.100265	-0.0268031	0.104812	0.132876	-0.073827	-0.15456		0.562408	-1.38746	0.403001		-1.95119
1536	0.198049	0.124129	-0.100607	-0.0272639	0.105457	0.132526	-0.0736466	-0.155931		0.560453	-1.38671	0.403874		-1.97748
1537	0.19816	0.123718	-0.100941	-0.0277246	0.106103	0.132175	-0.0734634	-0.1573		0.558424	-1.38583	0.404749		-1.92818
1538	0.198272	0.123307	-0.101269	-0.0281852	0.106751	0.131823	-0.0732776	-0.158669		0.556323	-1.38482	0.405625		-1.98077
1539	0.198384	0.122894	-0.101589	-0.0286455	0.1074	0.13147	-0.0730893	-0.160037		0.55415	-1.38368	0.406502		-1.97091
1540	0.198495	0.122481	-0.101903	-0.0291056	0.108049	0.131116	-0.0728987	-0.161403		0.551907	-1.38242	0.407379		-1.95776
1541	0.198607	0.122067	-0.102211	-0.0295654	0.1087	0.130763	-0.0727059	-0.162769		0.549595	-1.38103	0.408258		-1.98405
1542	0.198719	0.121652	-0.102512	-0.0300248	0.109352	0.130408	-0.0725111	-0.164134		0.547216	-1.37951	0.409137		-1.91174
1543	0.19883	0.121237	-0.102807	-0.0304838	0.110004	0.130054	-0.0723145	-0.165497		0.544772	-1.37788	0.410017		-1.95776
1544	0.198942	0.12082	-0.103095	-0.0309423	0.110657	0.129699	-0.0721161	-0.166859		0.542265	-1.37612	0.410898		-1.9742
1545	0.199054	0.120403	-0.103378	-0.0314002	0.111311	0.129345	-0.0719162	-0.16822		0.539695	-1.37424	0.41178		-2.01692
1546	0.199166	0.119985	-0.103654	-0.0318575	0.111966	0.12899	-0.0717148	-0.16958		0.537064	-1.37224	0.412662		-2.0005
1547	0.199279	0.119567	-0.103925	-0.0323141	0.112621	0.128636	-0.0715122	-0.170938		0.534375	-1.37013	0.413545		-1.846
1548	0.199391	0.119147	-0.104189	-0.0327699	0.113277	0.128282	-0.0713085	-0.172295		0.531628	-1.3679	0.414429		-1.95448
1549	0.199503	0.118727	-0.104449	-0.0332249	0.113933	0.127929	-0.0711038	-0.173651		0.528825	-1.36556	0.415313		-1.92489
1550	0.199616	0.118306	-0.104702	-0.0336788	0.11459	0.127577	-0.0708983	-0.175005		0.525968	-1.36311	0.416198		-1.95119
1551	0.199728	0.117885	-0.10495	-0.0341318	0.115246	0.127225	-0.0706921	-0.176358		0.523059	-1.36055	0.417083		-1.98734
1552	0.199841	0.117463	-0.105193	-0.0345835	0.115903	0.126874	-0.0704855	-0.177709		0.520099	-1.35788	0.417969		-2.05309
1553	0.199953	0.11704	-0.105431	-0.0350341	0.116559	0.126525	-0.0702785	-0.17906		0.51709	-1.3551	0.418856		-2.06623
1554	0.200066	0.116617	-0.105663	-0.0354833	0.117216	0.126176	-0.0700713	-0.180409		0.514033	-1.35222	0.419743		-2.03664
1555	0.200178	0.116193	-0.105891	-0.0359311	0.117872	0.125829	-0.069864	-0.181756		0.510931	-1.34924	0.420631		-2.10239
1556	0.200291	0.115768	-0.106114	-0.0363773	0.118527	0.125483	-0.0696569	-0.183102		0.507785	-1.34615	0.421519		-2.09581
1557	0.200403	0.115343	-0.106332	-0.0368218	0.119183	0.125139	-0.06945	-0.184447		0.504596	-1.34297	0.422409		-2.08595
1558	0.200515	0.114918	-0.106545	-0.0372646	0.119837	0.124796	-0.0692435	-0.18579		0.501367	-1.33969	0.423298		-2.12211
1559	0.200627	0.114491	-0.106754	-0.0377055	0.120491	0.124456	-0.0690375	-0.187132		0.498099	-1.33631	0.424189		-2.12211
1560	0.200739	0.114065	-0.106959	-0.0381443	0.121144	0.124117	-0.0688322	-0.188473		0.494793	-1.33283	0.42508		-2.07609
1561	0.200851	0.113638	-0.107159	-0.038581	0.121796	0.12378	-0.0686277	-0.189812		0.49145	-1.32927	0.425973		-2.05966
1562	0.200962	0.11321	-0.107355	-0.0390155	0.122447	0.123445	-0.0684242	-0.191149		0.488073	-1.32561	0.426866		-2.11882
1563	0.201073	0.112782	-0.107547	-0.0394475	0.123097	0.123113	-0.0682218	-0.192485		0.484662	-1.32186	0.42776		-2.11224
1564	0.201184	0.112353	-0.107735	-0.039877	0.123745	0.122783	-0.0680206	-0.19382		0.481219	-1.31802	0.428655		-2.15826
1565	0.201295	0.111925	-0.107919	-0.0403038	0.124392	0.122456	-0.0678209	-0.195153		0.477745	-1.3141	0.429551		-2.12868
1566	0.201405	0.111495	-0.1081	-0.0407278	0.125038	0.122131	-0.0676227	-0.196484		0.474241	-1.31009	0.430448		-2.16813
1567	0.201515	0.111066	-0.108276	-0.0411489	0.125682	0.121809	-0.0674262	-0.197814		0.470707	-1.306	0.431346		-2.15498
1568	0.201624	0.110636	-0.10845	-0.0415669	0.126323	0.12149	-0.0672315	-0.199142		0.467146	-1.30182	0.432244		-2.16813
1569	0.201732	0.110205	-0.10862	-0.0419818	0.126963	0.121174	-0.0670387	-0.200468		0.463557	-1.29757	0.433144		-2.10239
1570	0.201841	0.109775	-0.108786	-0.0423934	0.127601	0.120862	-0.0668481	-0.201793		0.459941	-1.29323	0.434045		-2.14512
1571	0.201948	0.109344	-0.10895	-0.0428015	0.128237	0.120552	-0.0666596	-0.203116		0.4563	-1.28882	0.434947		-2.1747
1572	0.202055	0.108913	-0.10911	-0.0432061	0.12887	0.120246	-0.0664734	-0.204437		0.452634	-1.28434	0.435849		-2.12211
1573	0.202161	0.108482	-0.109268	-0.0436071	0.1295	0.119944	-0.0662895	-0.205756		0.448943	-1.27978	0.436753		-2.12868
1574	0.202266	0.108051	-0.109422	-0.0440042	0.130128	0.119645	-0.0661081	-0.207073		0.445229	-1.27514	0.437657		-2.08924
1575	0.202371	0.10762	-0.109574	-0.0443975	0.130753	0.11935	-0.0659292	-0.208388		0.441491	-1.27044	0.438562		-2.0498
1576	0.202474	0.107188	-0.109723	-0.0447867	0.131375	0.119059	-0.0657528	-0.209702		0.43773	-1.26567	0.439468		-1.9972
1577	0.202576	0.106757	-0.109869	-0.0451718	0.131994	0.118772	-0.0655791	-0.211013		0.433947	-1.26083	0.440374		-2.09252
1578	0.202677	0.106326	-0.110012	-0.0455526	0.13261	0.118489	-0.0654081	-0.212322		0.430142	-1.25593	0.441281		-2.05966
1579	0.202778	0.105895	-0.110153	-0.0459291	0.133222	0.11821	-0.0652398	-0.213629		0.426315	-1.25096	0.442189		-2.11882
1580	0.202876	0.105464	-0.110292	-0.0463011	0.133831	0.117936	-0.0650742	-0.214934		0.422467	-1.24593	0.443096		-2.11224
1581	0.202974	0.105033	-0.110428	-0.0466685	0.134436	0.117667	-0.0649114	-0.216236		0.418598	-1.24083	0.444004		-2.06294
1582	0.20307	0.104602	-0.110561	-0.0470312	0.135037	0.117402	-0.0647514	-0.217537		0.414708	-1.23568	0.444912		-2.05966
1583	0.203164	0.104172	-0.110693	-0.0473891	0.135634	0.117142	-0.0645942	-0.218835		0.410797	-1.23047	0.44582		-2.05637
1584	0.203257	0.103743	-0.110822	-0.0477421	0.136227	0.116887	-0.0644398	-0.22013		0.406866	-1.22521	0.446728		-2.09252
1585	0.203348	0.103313	-0.110948	-0.0480901	0.136816	0.116637	-0.0642883	-0.221423		0.402916	-1.21988	0.447636		-2.08266
1586	0.203437	0.102885	-0.111073	-0.048433	0.1374	0.116392	-0.0641395	-0.222714		0.398945	-1.21451	0.448542		-2.10239
1587	0.203525	0.102457	-0.111196	-0.0487706	0.13798	0.116153	-0.0639936	-0.224002		0.394956	-1.20908	0.449448		-2.08595
1588	0.203611	0.102029	-0.111316	-0.0491029	0.138555	0.115919	-0.0638504	-0.225287		0.390949	-1.20361	0.450353		-2.06294
1589	0.203694	0.101603	-0.111434	-0.0494298	0.139125	0.11569	-0.06371	-0.226569		0.386923	-1.19808	0.451257		-2.01692
1590	0.203776	0.101177	-0.111551	-0.0497512	0.13969	0.115468	-0.0635723	-0.227849		0.38288	-1.19251	0.452159		-2.03008
1591	0.203855	0.100752	-0.111666	-0.050067	0.14025	0.115251	-0.0634373	-0.229126		0.37882	-1.18689	0.453059		-2.08266
1592	0.203932	0.100329	-0.111778	-0.0503771	0.140805	0.11504	-0.063305	-0.2304		0.374744	-1.18123	0.453957		-2.0005
1593	0.204007	0.0999061	-0.111889	-0.0506815	0.141355	0.114836	-0.0631752	-0.231671		0.370653	-1.17552	0.454852		-1.99063
1594	0.20408	0.0994848	-0.111998	-0.0509801	0.141899	0.114638	-0.063048	-0.232938		0.366547	-1.16978	0.455745		-2.01692
1595	0.204151	0.0990649	-0.112106	-0.0512729	0.142438	0.114446	-0.0629233	-0.234203		0.362427	-1.16399	0.456633		-1.98405
1596	0.204219	0.0986465	-0.112211	-0.0515598	0.142972	0.114261	-0.062801	-0.235464		0.358295	-1.15817	0.457518		-1.93803
1597	0.204285	0.0982297	-0.112315	-0.0518407	0.143499	0.114083	-0.0626812	-0.236723		0.35415	-1.15231	0.458399		-1.98734
1598	0.204348	0.0978146	-0.112418	-0.0521156	0.144021	0.113912	-0.0625637	-0.237978		0.349994	-1.14641	0.459274		-1.9479
1599	0.204409	0.0974013	-0.112519	-0.0523845	0.144538	0.113748	-0.0624485	-0.239229		0.345827	-1.14049	0.460144		-1.98405
1600	0.204467	0.0969899	-0.112618	-0.0526473	0.145048	0.113591	-0.0623355	-0.240477		0.341652	-1.13453	0.461007		-1.8723
1601	0.204523	0.0965806	-0.112716	-0.0529041	0.145553	0.113442	-0.0622247	-0.241722		0.337467	-1.12853	0.461864		-1.8723
1602	0.204577	0.0961735	-0.112813	-0.0531548	0.146051	0.1133	-0.062116	-0.242964		0.333275	-1.12252	0.462714		-1.85587
1603	0.204628	0.0957687	-0.112908	-0.0533993	0.146544	0.113166	-0.0620094	-0.244201		0.329077	-1.11647	0.463555		-1.80985
1604	0.204677	0.0953663	-0.113003	-0.0536378	0.14703	0.113041	-0.0619047	-0.245436		0.324872	-1.1104	0.464387		-1.76054
1605	0.204723	0.0949664	-0.113096	-0.0538702	0.14751	0.112923	-0.0618019	-0.246667		0.320663	-1.1043	0.465209		-1.78355
1606	0.204767	0.0945693	-0.113187	-0.0540964	0.147985	0.112814	-0.061701	-0.247894		0.316449	-1.09818	0.466022		-1.85258
1607	0.204809	0.094175	-0.113278	-0.0543167	0.148453	0.112713	-0.0616018	-0.249117		0.312233	-1.09205	0.466823		-1.82299
1608	0.204848	0.0937836	-0.113368	-0.0545309	0.148915	0.112621	-0.0615043	-0.250338		0.308013	-1.08589	0.467612		-1.76054
1609	0.204885	0.0933953	-0.113457	-0.0547391	0.14937	0.112538	-0.0614084	-0.251554		0.303792	-1.07972	0.468389		-1.78027
1610	0.204919	0.0930101	-0.113545	-0.0549413	0.14982	0.112464	-0.061314	-0.252767		0.29957	-1.07353	0.469152		-1.79669
1611	0.204952	0.0926283	-0.113632	-0.0551377	0.150263	0.1124	-0.0612211	-0.253976		0.295347	-1.06733	0.469901		-1.73425
1612	0.204982	0.09225	-0.113719	-0.0553283	0.1507	0.112344	-0.0611294	-0.255182		0.291125	-1.06112	0.470636		-1.75397
1613	0.20501	0.0918752	-0.113804	-0.0555132	0.151131	0.112299	-0.0610391	-0.256384		0.286904	-1.05489	0.471354		-1.71124
1614	0.205036	0.091504	-0.113889	-0.0556924	0.151556	0.112263	-0.06095	-0.257582		0.282684	-1.04867	0.472057		-1.77369
1615	0.20506	0.0911367	-0.113973	-0.055866	0.151974	0.112236	-0.0608619	-0.258777		0.278467	-1.04243	0.472742		-1.78027
1616	0.205082	0.0907731	-0.114057	-0.0560342	0.152387	0.11222	-0.0607749	-0.259969		0.274252	-1.03619	0.473409		-1.75069
1617	0.205103	0.0904136	-0.11414	-0.0561969	0.152793	0.112214	-0.0606889	-0.261156		0.27004	-1.02995	0.474057		-1.7211
1618	0.205121	0.0900581	-0.114223	-0.0563544	0.153194	0.112218	-0.0606037	-0.26234		0.265832	-1.02371	0.474687		-1.79999
1619	0.205138	0.0897068	-0.114306	-0.0565066	0.153588	0.112233	-0.0605193	-0.26352		0.261628	-1.01748	0.475296		-1.76711
1620	0.205153	0.0893598	-0.114388	-0.0566538	0.153977	0.112258	-0.0604357	-0.264697		0.257429	-1.01125	0.475884		-1.76711
1621	0.205167	0.0890171	-0.114469	-0.056796	0.15436	0.112294	-0.0603527	-0.26587		0.253233	-1.00502	0.476451		-1.70467
1622	0.20518	0.0886788	-0.114551	-0.0569334	0.154737	0.11234	-0.0602704	-0.267039		0.249043	-0.998801	0.476996		-1.74082
1623	0.205191	0.0883449	-0.114632	-0.057066	0.155108	0.112397	-0.0601887	-0.268205		0.244858	-0.992593	0.477518		-1.67508
1624	0.205201	0.0880157	-0.114713	-0.057194	0.155474	0.112466	-0.0601075	-0.269367		0.240677	-0.986397	0.478017		-1.69151
1625	0.205209	0.0876911	-0.114794	-0.0573176	0.155834	0.112545	-0.0600268	-0.270526		0.236502	-0.980215	0.478491		-1.6455
1626	0.205217	0.0873713	-0.114874	-0.0574368	0.156189	0.112635	-0.0599466	-0.271681		0.232332	-0.974048	0.478941		-1.66522
1627	0.205224	0.0870562	-0.114955	-0.0575518	0.156539	0.112737	-0.0598668	-0.272832		0.228168	-0.967899	0.479364		-1.72767
1628	0.20523	0.0867461	-0.115036	-0.0576627	0.156884	0.11285	-0.0597874	-0.27398		0.224008	-0.96177	0.479762		-1.74082
1629	0.205236	0.0864408	-0.115116	-0.0577698	0.157223	0.112974	-0.0597083	-0.275125		0.219854	-0.955661	0.480133		-1.70138
1630	0.205241	0.0861405	-0.115197	-0.057873	0.157558	0.11311	-0.0596297	-0.276266		0.215704	-0.949576	0.480477		-1.66193
1631	0.205245	0.0858453	-0.115278	-0.0579727	0.157888	0.113257	-0.0595513	-0.277403		0.211559	-0.943515	0.480793		-1.66522
1632	0.20525	0.0855552	-0.115358	-0.0580689	0.158213	0.113415	-0.0594733	-0.278538		0.207419	-0.93748	0.481081		-1.66193
1633	0.205254	0.0852702	-0.115439	-0.0581617	0.158534	0.113585	-0.0593957	-0.279669		0.203283	-0.931474	0.48134		-1.63892
1634	0.205258	0.0849904	-0.11552	-0.0582514	0.15885	0.113767	-0.0593183	-0.280796		0.19915	-0.925498	0.481569		-1.60605
1635	0.205263	0.0847158	-0.115602	-0.058338	0.159163	0.11396	-0.0592412	-0.281921		0.195021	-0.919553	0.481769		-1.61263
1636	0.205267	0.0844465	-0.115683	-0.0584218	0.159471	0.114165	-0.0591643	-0.283042		0.190895	-0.913642	0.481938		-1.58305
1637	0.205273	0.0841825	-0.115764	-0.0585029	0.159776	0.114382	-0.0590877	-0.28416		0.186772	-0.907765	0.482077		-1.5929
1638	0.205278	0.0839237	-0.115846	-0.0585815	0.160077	0.11461	-0.0590114	-0.285274		0.182651	-0.901924	0.482184		-1.51402
1639	0.205285	0.0836703	-0.115927	-0.0586576	0.160375	0.114849	-0.0589353	-0.286386		0.178532	-0.89612	0.482261		-1.55018
1640	0.205292	0.0834222	-0.116009	-0.0587315	0.16067	0.1151	-0.0588593	-0.287495		0.174415	-0.890355	0.482306		-1.57647
1641	0.205301	0.0831795	-0.116091	-0.0588033	0.160962	0.115362	-0.0587836	-0.288601		0.1703	-0.884631	0.482318		-1.51073
1642	0.205311	0.0829421	-0.116172	-0.0588733	0.161251	0.115636	-0.058708	-0.289703		0.166185	-0.878947	0.482299		-1.54032
1643	0.205322	0.0827101	-0.116254	-0.0589415	0.161537	0.115921	-0.0586325	-0.290803		0.162071	-0.873305	0.482248		-1.5929
1644	0.205335	0.0824834	-0.116336	-0.0590082	0.161821	0.116217	-0.0585571	-0.291901		0.157957	-0.867706	0.482163		-1.52059
1645	0.20535	0.0822621	-0.116417	-0.0590735	0.162103	0.116524	-0.0584818	-0.292995		0.153843	-0.862152	0.482047		-1.5436
1646	0.205366	0.0820462	-0.116499	-0.0591376	0.162383	0.116842	-0.0584065	-0.294087		0.149727	-0.856642	0.481897		-1.41541
1647	0.205385	0.0818356	-0.11658	-0.0592006	0.162661	0.117171	-0.0583313	-0.295177		0.145611	-0.851179	0.481714		-1.43842
1648	0.205405	0.0816303	-0.116661	-0.0592628	0.162938	0.117511	-0.058256	-0.296264		0.141493	-0.845762	0.481498		-1.50087
1649	0.205428	0.0814303	-0.116742	-0.0593244	0.163213	0.117862	-0.0581807	-0.297349		0.137374	-0.840393	0.48125		-1.42856
1650	0.205454	0.0812356	-0.116822	-0.0593855	0.163487	0.118223	-0.0581054	-0.298432		0.133252	-0.835072	0.480968		-1.50744
1651	0.205481	0.0810461	-0.116902	-0.0594462	0.16376	0.118594	-0.05803	-0.299513		0.129127	-0.8298	0.480653		-1.48772
1652	0.205511	0.0808618	-0.116981	-0.0595069	0.164032	0.118976	-0.0579545	-0.300592		0.124999	-0.824578	0.480305		-1.55018
1653	0.205544	0.0806827	-0.11706	-0.0595676	0.164304	0.119368	-0.057879	-0.30167		0.120868	-0.819406	0.479924		-1.56004
1654	0.20558	0.0805086	-0.117138	-0.0596285	0.164575	0.119769	-0.0578033	-0.302745		0.116732	-0.814284	0.47951		-1.5929
1655	0.205619	0.0803396	-0.117216	-0.0596899	0.164846	0.12018	-0.0577275	-0.303819		0.112593	-0.809214	0.479064		-1.55346
1656	0.20566	0.0801757	-0.117293	-0.0597519	0.165116	0.120601	-0.0576516	-0.304892		0.108449	-0.804195	0.478585		-1.61591
1657	0.205705	0.0800166	-0.117369	-0.0598147	0.165387	0.121031	-0.0575755	-0.305964		0.1043	-0.799228	0.478074		-1.62249
1658	0.205753	0.0798624	-0.117444	-0.0598785	0.165659	0.12147	-0.0574993	-0.307034		0.100145	-0.794313	0.477531		-1.67837
1659	0.205804	0.079713	-0.117518	-0.0599433	0.16593	0.121918	-0.0574228	-0.308103		0.0959849	-0.78945	0.476957		-1.59619
1660	0.205858	0.0795684	-0.117591	-0.0600095	0.166202	0.122375	-0.0573461	-0.309172		0.0918183	-0.78464	0.476352		-1.57647
1661	0.205915	0.0794284	-0.117663	-0.0600771	0.166475	0.12284	-0.0572692	-0.310239		0.0876448	-0.779882	0.475715		-1.67179
1662	0.205976	0.079293	-0.117733	-0.0601462	0.166749	0.123313	-0.057192	-0.311306		0.0834641	-0.775177	0.475049		-1.55675
1663	0.206041	0.079162	-0.117802	-0.0602172	0.167024	0.123794	-0.0571145	-0.312373		0.0792755	-0.770525	0.474352		-1.62907
1664	0.206108	0.0790355	-0.11787	-0.06029	0.167301	0.124283	-0.0570367	-0.313439		0.0750785	-0.765926	0.473627		-1.60605
1665	0.20618	0.0789134	-0.117936	-0.0603649	0.167578	0.124779	-0.0569585	-0.314504		0.0708726	-0.76138	0.472873		-1.68166
1666	0.206254	0.0787955	-0.118001	-0.060442	0.167857	0.125282	-0.05688	-0.31557		0.0666572	-0.756886	0.472091		-1.5929
1667	0.206333	0.0786818	-0.118063	-0.0605214	0.168138	0.125792	-0.056801	-0.316635		0.0624317	-0.752445	0.471281		-1.57976
1668	0.206414	0.0785722	-0.118124	-0.0606033	0.16842	0.126309	-0.0567217	-0.3177		0.0581955	-0.748056	0.470445		-1.63235
1669	0.2065	0.0784666	-0.118183	-0.0606879	0.168704	0.126833	-0.0566418	-0.318765		0.0539482	-0.74372	0.469584		-1.58305
1670	0.206589	0.0783649	-0.118239	-0.0607751	0.168991	0.127362	-0.0565615	-0.31983		0.0496891	-0.739435	0.468697		-1.58305
1671	0.206681	0.0782671	-0.118294	-0.0608653	0.169279	0.127898	-0.0564808	-0.320895		0.0454178	-0.735202	0.467786		-1.5173
1672	0.206778	0.078173	-0.118346	-0.0609585	0.16957	0.128439	-0.0563995	-0.321961		0.0411338	-0.731019	0.466852		-1.46471
1673	0.206878	0.0780825	-0.118396	-0.0610548	0.169863	0.128985	-0.0563176	-0.323028		0.0368365	-0.726887	0.465895		-1.43513
1674	0.206981	0.0779956	-0.118443	-0.0611545	0.170158	0.129537	-0.0562352	-0.324095		0.0325256	-0.722804	0.464916		-1.49101
1675	0.207089	0.0779123	-0.118488	-0.0612575	0.170457	0.130094	-0.0561522	-0.325162		0.0282005	-0.71877	0.463917		-1.49101
1676	0.207199	0.0778323	-0.11853	-0.0613641	0.170758	0.130655	-0.0560687	-0.326231		0.0238609	-0.714784	0.462898		-1.41541
1677	0.207314	0.0777556	-0.118569	-0.0614742	0.171062	0.13122	-0.0559845	-0.3273		0.0195063	-0.710847	0.461859		-1.45157
1678	0.207432	0.0776821	-0.118605	-0.0615882	0.171368	0.13179	-0.0558996	-0.328371		0.0151361	-0.706955	0.460803		-1.44499
1679	0.207554	0.0776118	-0.118639	-0.0617059	0.171678	0.132364	-0.0558142	-0.329443		0.0107501	-0.70311	0.459729		-1.34638
1680	0.20768	0.0775446	-0.118669	-0.0618277	0.171991	0.132941	-0.055728	-0.330516		0.00634784	-0.69931	0.458639		-1.26421
1681	0.207809	0.0774804	-0.118697	-0.0619534	0.172308	0.133522	-0.0556413	-0.33159		0.0019289	-0.695555	0.457533		-1.31023
1682	0.207942	0.0774191	-0.118722	-0.0620833	0.172628	0.134106	-0.0555538	-0.332666		-0.00250702	-0.691842	0.456413		-1.27735
1683	0.208079	0.0773606	-0.118743	-0.0622173	0.172951	0.134692	-0.0554657	-0.333743		-0.00696021	-0.688172	0.45528		-1.19847
1684	0.208219	0.077305	-0.118761	-0.0623556	0.173278	0.135281	-0.0553769	-0.334822		-0.0114309	-0.684543	0.454133		-1.23791
1685	0.208362	0.077252	-0.118776	-0.0624983	0.173608	0.135873	-0.0552875	-0.335903		-0.0159192	-0.680955	0.452975		-1.18532
1686	0.208509	0.0772016	-0.118788	-0.0626454	0.173943	0.136467	-0.0551973	-0.336985		-0.0204254	-0.677405	0.451805		-1.18532
1687	0.20866	0.0771538	-0.118796	-0.062797	0.174281	0.137063	-0.0551065	-0.338069		-0.0249494	-0.673893	0.450625		-1.13602
1688	0.208814	0.0771085	-0.118801	-0.0629532	0.174623	0.13766	-0.0550151	-0.339156		-0.0294914	-0.670418	0.449436		-1.10314
1689	0.208972	0.0770655	-0.118803	-0.0631139	0.174969	0.138259	-0.054923	-0.340244		-0.0340513	-0.666978	0.448238		-1.00782
1690	0.209133	0.0770249	-0.118801	-0.0632793	0.175319	0.138859	-0.0548302	-0.341334		-0.0386291	-0.663572	0.447033		-1.0407
1691	0.209297	0.0769865	-0.118796	-0.0634494	0.175673	0.139461	-0.0547368	-0.342426		-0.0432247	-0.6602	0.44582		-1.01768
1692	0.209465	0.0769503	-0.118787	-0.0636241	0.176031	0.140063	-0.0546428	-0.34352		-0.0478379	-0.656859	0.444601		-1.00782
1693	0.209635	0.0769162	-0.118775	-0.0638036	0.176393	0.140665	-0.0545482	-0.344616		-0.0524683	-0.653549	0.443376		-1.02426
1694	0.20981	0.0768842	-0.11876	-0.0639879	0.17676	0.141268	-0.054453	-0.345714		-0.0571157	-0.650268	0.442147		-0.978241
1695	0.209987	0.0768541	-0.118741	-0.064177	0.177131	0.141871	-0.0543573	-0.346814		-0.0617796	-0.647015	0.440914		-0.915787
1696	0.210167	0.0768259	-0.118719	-0.0643709	0.177506	0.142474	-0.0542609	-0.347917		-0.0664594	-0.643788	0.439677		-0.961807
1697	0.210351	0.0767995	-0.118693	-0.0645695	0.177886	0.143077	-0.054164	-0.349021		-0.0711547	-0.640588	0.438437		-0.945374
1698	0.210538	0.0767749	-0.118664	-0.064773	0.17827	0.143679	-0.0540665	-0.350128		-0.0758647	-0.637412	0.437195		-0.836899
1699	0.210728	0.0767521	-0.118631	-0.0649813	0.178659	0.144281	-0.0539685	-0.351236		-0.0805887	-0.634258	0.435951		-0.896065
1700	0.210921	0.0767308	-0.118595	-0.0651943	0.179052	0.144881	-0.05387	-0.352347		-0.0853259	-0.631127	0.434707		-0.896065
1701	0.211117	0.0767111	-0.118555	-0.0654122	0.17945	0.145481	-0.053771	-0.35346		-0.0900756	-0.628017	0.433463		-0.93222
1702	0.211316	0.0766929	-0.118512	-0.0656348	0.179853	0.146079	-0.0536715	-0.354575		-0.0948368	-0.624925	0.432219		-0.981529
1703	0.211518	0.0766761	-0.118466	-0.065862	0.18026	0.146676	-0.0535716	-0.355692		-0.0996087	-0.621853	0.430975		-1.02097
1704	0.211723	0.0766607	-0.118416	-0.066094	0.180672	0.147272	-0.0534712	-0.356811		-0.10439	-0.618797	0.429734		-0.945374
1705	0.21193	0.0766465	-0.118362	-0.0663306	0.181088	0.147865	-0.0533704	-0.357931		-0.10918	-0.615757	0.428495		-0.909218
1706	0.212141	0.0766335	-0.118305	-0.0665717	0.18151	0.148456	-0.0532692	-0.359054		-0.113978	-0.612732	0.427258		-0.912498
1707	0.212354	0.0766216	-0.118245	-0.0668174	0.181936	0.149046	-0.0531677	-0.360179		-0.118783	-0.60972	0.426025		-0.856621
1708	0.212571	0.0766108	-0.118182	-0.0670676	0.182367	0.149632	-0.0530659	-0.361305		-0.123593	-0.606722	0.424795		-0.73172
1709	0.212789	0.076601	-0.118115	-0.0673221	0.182802	0.150217	-0.0529638	-0.362433		-0.128407	-0.603735	0.42357		-0.83033
1710	0.213011	0.0765921	-0.118045	-0.0675811	0.183243	0.150798	-0.0528615	-0.363563		-0.133225	-0.600759	0.42235		-0.810608
1711	0.213235	0.076584	-0.117972	-0.0678443	0.183688	0.151377	-0.0527589	-0.364694		-0.138046	-0.597793	0.421135		-0.810608
1712	0.213462	0.0765767	-0.117895	-0.0681117	0.184138	0.151952	-0.0526562	-0.365827		-0.142868	-0.594835	0.419926		-0.827034
1713	0.213691	0.0765701	-0.117816	-0.0683833	0.184592	0.152524	-0.0525533	-0.366961		-0.14769	-0.591887	0.418723		-0.840195
1714	0.213923	0.0765642	-0.117733	-0.0686589	0.185051	0.153093	-0.0524503	-0.368097		-0.152512	-0.588945	0.417527		-0.790886
1715	0.214157	0.0765589	-0.117647	-0.0689386	0.185515	0.153659	-0.0523472	-0.369234		-0.157332	-0.586011	0.416338		-0.83033
1716	0.214393	0.0765541	-0.117558	-0.0692222	0.185983	0.15422	-0.052244	-0.370372		-0.162149	-0.583084	0.415156		-0.794174
1717	0.214631	0.0765499	-0.117467	-0.0695098	0.186456	0.154778	-0.0521408	-0.371512		-0.166962	-0.580163	0.413983		-0.794174
1718	0.214872	0.0765461	-0.117372	-0.0698012	0.186933	0.155333	-0.0520375	-0.372652		-0.17177	-0.577248	0.412817		-0.777733
1719	0.215115	0.0765428	-0.117274	-0.0700963	0.187414	0.155883	-0.0519342	-0.373794		-0.176573	-0.574339	0.41166		-0.859909
1720	0.215359	0.0765399	-0.117174	-0.0703952	0.1879	0.156429	-0.0518309	-0.374937		-0.18137	-0.571436	0.410512		-0.840195
1721	0.215606	0.0765373	-0.117071	-0.0706977	0.188389	0.156971	-0.0517276	-0.37608		-0.186158	-0.568539	0.409373		-0.800751
1722	0.215854	0.076535	-0.116965	-0.0710039	0.188883	0.157509	-0.0516243	-0.377224		-0.190939	-0.565649	0.408243		-0.725143
1723	0.216103	0.0765331	-0.116857	-0.0713136	0.189381	0.158042	-0.051521	-0.378369		-0.195711	-0.562765	0.407124		-0.646255
1724	0.216355	0.0765313	-0.116746	-0.0716269	0.189882	0.158571	-0.0514177	-0.379515		-0.200473	-0.559888	0.406014		-0.725143
1725	0.216607	0.0765298	-0.116633	-0.0719436	0.190387	0.159096	-0.0513144	-0.380661		-0.205225	-0.557018	0.404914		-0.771164
1726	0.216861	0.0765285	-0.116517	-0.0722637	0.190896	0.159616	-0.051211	-0.381808		-0.209965	-0.554158	0.403824		-0.748154
1727	0.217116	0.0765274	-0.116399	-0.0725871	0.191407	0.160132	-0.0511075	-0.382955		-0.214694	-0.551306	0.402745		-0.675842
1728	0.217372	0.0765264	-0.116279	-0.0729138	0.191922	0.160643	-0.0510039	-0.384102		-0.21941	-0.548464	0.401677		-0.715286
1729	0.217629	0.0765256	-0.116156	-0.0732438	0.19244	0.161149	-0.0509002	-0.38525		-0.224114	-0.545633	0.40062		-0.626534
1730	0.217887	0.0765248	-0.116031	-0.0735769	0.192961	0.161651	-0.0507964	-0.386398		-0.228804	-0.542814	0.399573		-0.626534
1731	0.218145	0.0765242	-0.115904	-0.0739131	0.193484	0.162147	-0.0506923	-0.387546		-0.233481	-0.540009	0.398538		-0.685699
1732	0.218404	0.0765236	-0.115775	-0.0742523	0.194009	0.16264	-0.0505879	-0.388693		-0.238143	-0.537218	0.397515		-0.600239
1733	0.218662	0.0765231	-0.115644	-0.0745944	0.194537	0.163127	-0.0504832	-0.389841		-0.24279	-0.534442	0.396503		-0.58709
1734	0.218921	0.0765227	-0.115511	-0.0749394	0.195066	0.16361	-0.0503782	-0.390988		-0.247422	-0.531684	0.395503		-0.547646
1735	0.21918	0.0765223	-0.115376	-0.0752872	0.195597	0.164088	-0.0502726	-0.392135		-0.252038	-0.528944	0.394515		-0.541077
1736	0.219438	0.0765219	-0.11524	-0.0756378	0.19613	0.164561	-0.0501666	-0.393281		-0.256638	-0.526224	0.393539		-0.455612
1737	0.219696	0.0765215	-0.115102	-0.0759909	0.196664	0.165029	-0.0500599	-0.394426		-0.261221	-0.523525	0.392576		-0.426025
1738	0.219953	0.0765212	-0.114962	-0.0763466	0.197199	0.165493	-0.0499526	-0.395571		-0.265787	-0.520849	0.391625		-0.35043
1739	0.22021	0.0765209	-0.11482	-0.0767048	0.197734	0.165952	-0.0498445	-0.396714		-0.270336	-0.518196	0.390687		-0.376724
1740	0.220465	0.0765206	-0.114677	-0.0770654	0.19827	0.166406	-0.0497355	-0.397857		-0.274868	-0.515569	0.389762		-0.439178
1741	0.22072	0.0765202	-0.114532	-0.0774282	0.198807	0.166856	-0.0496256	-0.398998		-0.279382	-0.512969	0.38885		-0.416168
1742	0.220973	0.0765199	-0.114386	-0.0777934	0.199343	0.167301	-0.0495146	-0.400137		-0.283877	-0.510397	0.387951		-0.465473
1743	0.221224	0.0765196	-0.114239	-0.0781606	0.199879	0.167742	-0.0494025	-0.401275		-0.288354	-0.507855	0.387066		-0.455612
1744	0.221474	0.0765193	-0.11409	-0.0785299	0.200415	0.168178	-0.0492891	-0.402412		-0.292813	-0.505343	0.386195		-0.41946
1745	0.221721	0.076519	-0.113939	-0.0789012	0.20095	0.168609	-0.0491744	-0.403546		-0.297253	-0.502863	0.385337		-0.360294
1746	0.221967	0.0765186	-0.113788	-0.0792745	0.201484	0.169037	-0.0490582	-0.404678		-0.301674	-0.500417	0.384494		-0.376724
1747	0.22221	0.0765183	-0.113635	-0.0796496	0.202016	0.169459	-0.0489405	-0.405808		-0.306076	-0.498005	0.383664		-0.389873
1748	0.22245	0.0765179	-0.113481	-0.0800265	0.202548	0.169878	-0.0488211	-0.406936		-0.310459	-0.49563	0.382849		-0.370152
1749	0.222688	0.0765174	-0.113325	-0.0804051	0.203077	0.170292	-0.0486998	-0.408061		-0.314822	-0.493292	0.382049		-0.396446
1750	0.222923	0.0765169	-0.113169	-0.0807854	0.203605	0.170701	-0.0485766	-0.409184		-0.319167	-0.490993	0.381263		-0.527931
1751	0.223155	0.0765163	-0.113011	-0.0811674	0.20413	0.171107	-0.0484514	-0.410304		-0.323492	-0.488733	0.380492		-0.462189
1752	0.223383	0.0765157	-0.112852	-0.0815508	0.204653	0.171508	-0.048324	-0.411421		-0.327797	-0.486514	0.379737		-0.432602
1753	0.223608	0.0765149	-0.112692	-0.0819358	0.205173	0.171905	-0.0481943	-0.412535		-0.332084	-0.484338	0.378996		-0.521355
1754	0.22383	0.0765139	-0.112531	-0.0823222	0.20569	0.172298	-0.0480622	-0.413646		-0.336352	-0.482205	0.378271		-0.491768
1755	0.224047	0.0765128	-0.112368	-0.08271	0.206204	0.172687	-0.0479277	-0.414754		-0.3406	-0.480116	0.377561		-0.439178
1756	0.22426	0.0765114	-0.112205	-0.0830992	0.206714	0.173071	-0.0477904	-0.415859		-0.34483	-0.478073	0.376868		-0.521355
1757	0.224469	0.0765097	-0.11204	-0.0834896	0.207221	0.173452	-0.0476505	-0.41696		-0.34904	-0.476077	0.37619		-0.426025
1758	0.224673	0.0765077	-0.111875	-0.0838813	0.207724	0.173828	-0.0475077	-0.418057		-0.353232	-0.474129	0.375528		-0.4589
1759	0.224873	0.0765053	-0.111708	-0.0842741	0.208223	0.174201	-0.0473619	-0.419151		-0.357406	-0.47223	0.374882		-0.462189
1760	0.225068	0.0765025	-0.11154	-0.0846682	0.208717	0.174569	-0.047213	-0.420241		-0.36156	-0.47038	0.374253		-0.498344
1761	0.225257	0.0764992	-0.111371	-0.0850633	0.209207	0.174933	-0.047061	-0.421327		-0.365696	-0.468582	0.373641		-0.439178
1762	0.225442	0.0764953	-0.111201	-0.0854596	0.209692	0.175293	-0.0469057	-0.42241		-0.369813	-0.466835	0.373044		-0.33728
1763	0.225621	0.0764908	-0.111031	-0.0858568	0.210172	0.17565	-0.046747	-0.423488		-0.373912	-0.465141	0.372465		-0.314274
1764	0.225795	0.0764857	-0.110859	-0.0862551	0.210647	0.176002	-0.0465849	-0.424562		-0.377992	-0.463501	0.371902		-0.37344
1765	0.225963	0.0764799	-0.110685	-0.0866544	0.211117	0.17635	-0.0464192	-0.425632		-0.382054	-0.461914	0.371356		-0.310986
1766	0.226126	0.0764732	-0.110511	-0.0870547	0.21158	0.176695	-0.0462499	-0.426697		-0.386097	-0.460383	0.370826		-0.307701
1767	0.226282	0.0764657	-0.110336	-0.0874559	0.212038	0.177035	-0.0460768	-0.427758		-0.390121	-0.458908	0.370313		-0.370152
1768	0.226433	0.0764573	-0.110159	-0.0878581	0.21249	0.177371	-0.0459	-0.428815		-0.394127	-0.457489	0.369817		-0.327419
1769	0.226577	0.076448	-0.109982	-0.0882612	0.212936	0.177704	-0.0457193	-0.429867		-0.398114	-0.456127	0.369337		-0.33728
1770	0.226716	0.0764376	-0.109803	-0.0886652	0.213376	0.178032	-0.0455347	-0.430915		-0.402083	-0.454822	0.368874		-0.255108
1771	0.226847	0.0764261	-0.109623	-0.0890701	0.213809	0.178357	-0.045346	-0.431958		-0.406033	-0.453577	0.368427		-0.225525
1772	0.226973	0.0764135	-0.109442	-0.0894759	0.214235	0.178677	-0.0451533	-0.432997		-0.409964	-0.45239	0.367997		-0.251823
1773	0.227092	0.0763997	-0.109259	-0.0898826	0.214654	0.178994	-0.0449564	-0.434032		-0.413876	-0.451262	0.367582		-0.248535
1774	0.227205	0.0763847	-0.109075	-0.0902902	0.215067	0.179307	-0.0447553	-0.435062		-0.417769	-0.450194	0.367183		-0.209091
1775	0.22731	0.0763683	-0.10889	-0.0906988	0.215472	0.179615	-0.0445499	-0.436088		-0.421643	-0.449186	0.366799		-0.156494
1776	0.22741	0.0763506	-0.108703	-0.0911081	0.21587	0.17992	-0.0443402	-0.437109		-0.425497	-0.448238	0.366431		-0.241959
1777	0.227502	0.0763315	-0.108515	-0.0915184	0.216261	0.180221	-0.0441261	-0.438126		-0.429332	-0.447351	0.366078		-0.222237
1778	0.227587	0.076311	-0.108326	-0.0919296	0.216644	0.180518	-0.0439075	-0.43914		-0.433146	-0.446526	0.365739		-0.11705
1779	0.227666	0.076289	-0.108134	-0.0923416	0.21702	0.180812	-0.0436844	-0.440149		-0.436941	-0.445761	0.365415		-0.202515
1780	0.227737	0.0762654	-0.107941	-0.0927545	0.217388	0.181101	-0.0434568	-0.441154		-0.440716	-0.445058	0.365105		-0.212379
1781	0.227802	0.0762402	-0.107746	-0.0931683	0.217748	0.181386	-0.0432247	-0.442155		-0.44447	-0.444417	0.364809		-0.218952
1782	0.227859	0.0762134	-0.10755	-0.0935829	0.2181	0.181668	-0.042988	-0.443152		-0.448202	-0.443837	0.364527		-0.228813
1783	0.227909	0.0761849	-0.107351	-0.0939984	0.218444	0.181945	-0.0427468	-0.444146		-0.451914	-0.443319	0.364257		-0.19923
1784	0.227952	0.0761547	-0.107151	-0.0944148	0.21878	0.182219	-0.0425009	-0.445137		-0.455604	-0.442863	0.364001		-0.15321
1785	0.227987	0.0761227	-0.106948	-0.0948321	0.219108	0.182489	-0.0422505	-0.446124		-0.459272	-0.442469	0.363756		-0.126915
1786	0.228015	0.0760889	-0.106744	-0.0952502	0.219427	0.182755	-0.0419954	-0.447108		-0.462917	-0.442137	0.363524		-0.205803
1787	0.228036	0.0760533	-0.106537	-0.0956692	0.219738	0.183017	-0.0417358	-0.448088		-0.46654	-0.441866	0.363303		-0.235386
1788	0.228049	0.0760157	-0.106328	-0.0960892	0.220041	0.183275	-0.0414717	-0.449066		-0.47014	-0.441657	0.363093		-0.235386
1789	0.228054	0.0759762	-0.106116	-0.09651	0.220335	0.18353	-0.041203	-0.450041		-0.473716	-0.44151	0.362894		-0.195938
1790	0.228052	0.0759348	-0.105902	-0.0969317	0.220621	0.183781	-0.0409298	-0.451014		-0.477268	-0.441424	0.362705		-0.192657
1791	0.228043	0.0758913	-0.105686	-0.0973544	0.220899	0.184027	-0.0406522	-0.451984		-0.480795	-0.441399	0.362525		-0.232101
1792	0.228025	0.0758458	-0.105467	-0.097778	0.221168	0.18427	-0.0403702	-0.452952		-0.484297	-0.441436	0.362354		-0.182793
1793	0.228	0.0757982	-0.105245	-0.0982026	0.221428	0.184509	-0.0400838	-0.453919		-0.487773	-0.441533	0.362192		-0.192657
1794	0.227967	0.0757485	-0.105021	-0.0986282	0.22168	0.184745	-0.0397931	-0.454883		-0.491222	-0.441691	0.362037		-0.248535
1795	0.227927	0.0756967	-0.104794	-0.0990547	0.221923	0.184976	-0.0394983	-0.455846		-0.494644	-0.441909	0.36189		-0.192657
1796	0.227878	0.0756427	-0.104564	-0.0994823	0.222158	0.185204	-0.0391992	-0.456807		-0.498038	-0.442187	0.361749		-0.301125
1797	0.227822	0.0755866	-0.104331	-0.0999109	0.222385	0.185428	-0.0388961	-0.457768		-0.501404	-0.442524	0.361614		-0.27483
1798	0.227758	0.0755281	-0.104095	-0.100341	0.222602	0.185648	-0.0385891	-0.458727		-0.504739	-0.442921	0.361484		-0.297844
1799	0.227686	0.0754674	-0.103856	-0.100771	0.222812	0.185864	-0.0382781	-0.459686		-0.508045	-0.443375	0.361358		-0.294552
1800	0.227606	0.0754044	-0.103613	-0.101203	0.223013	0.186077	-0.0379634	-0.460645		-0.511319	-0.443888	0.361236		-0.333996
1801	0.227518	0.0753391	-0.103368	-0.101636	0.223205	0.186286	-0.037645	-0.461604		-0.514561	-0.444458	0.361117		-0.294552
1802	0.227422	0.0752714	-0.103119	-0.10207	0.22339	0.186491	-0.0373229	-0.462562		-0.517771	-0.445084	0.361		-0.294552
1803	0.227318	0.0752012	-0.102867	-0.102505	0.223566	0.186692	-0.0369974	-0.463521		-0.520947	-0.445767	0.360885		-0.304409
1804	0.227206	0.0751287	-0.102612	-0.102941	0.223733	0.18689	-0.0366684	-0.464481		-0.524088	-0.446504	0.36077		-0.327419
1805	0.227086	0.0750537	-0.102353	-0.103379	0.223893	0.187084	-0.0363362	-0.465441		-0.527194	-0.447296	0.360654		-0.406303
1806	0.226957	0.0749762	-0.10209	-0.103817	0.224044	0.187274	-0.0360008	-0.466402		-0.530264	-0.448141	0.360538		-0.333996
1807	0.226821	0.0748962	-0.101824	-0.104257	0.224188	0.18746	-0.0356623	-0.467365		-0.533297	-0.449039	0.36042		-0.314274
1808	0.226677	0.0748137	-0.101554	-0.104698	0.224323	0.187643	-0.0353208	-0.468329		-0.536293	-0.449988	0.3603		-0.330708
1809	0.226525	0.0747287	-0.101281	-0.105139	0.224451	0.187822	-0.0349766	-0.469295		-0.539249	-0.450988	0.360176		-0.35043
1810	0.226364	0.0746411	-0.101003	-0.105582	0.22457	0.187997	-0.0346296	-0.470263		-0.542166	-0.452037	0.360047		-0.340572
1811	0.226195	0.0745509	-0.100722	-0.106027	0.224682	0.188168	-0.0342802	-0.471233		-0.545042	-0.453135	0.359914		-0.389873
1812	0.226019	0.0744582	-0.100437	-0.106472	0.224787	0.188336	-0.0339283	-0.472205		-0.547878	-0.45428	0.359775		-0.37344
1813	0.225834	0.0743629	-0.100149	-0.106918	0.224883	0.1885	-0.0335742	-0.47318		-0.550671	-0.455471	0.35963		-0.383297
1814	0.225641	0.074265	-0.0998561	-0.107366	0.224972	0.188661	-0.033218	-0.474158		-0.553422	-0.456708	0.359477		-0.360294
1815	0.22544	0.0741646	-0.0995595	-0.107815	0.225054	0.188818	-0.0328598	-0.475139		-0.55613	-0.457988	0.359316		-0.370152
1816	0.22523	0.0740617	-0.099259	-0.108264	0.225128	0.188972	-0.0325	-0.476123		-0.558793	-0.459311	0.359146		-0.399738
1817	0.225013	0.0739562	-0.0989545	-0.108715	0.225194	0.189122	-0.0321385	-0.47711		-0.561412	-0.460675	0.358966		-0.380016
1818	0.224787	0.0738483	-0.0986461	-0.109167	0.225254	0.189269	-0.0317757	-0.478101		-0.563987	-0.46208	0.358777		-0.297844
1819	0.224553	0.0737379	-0.0983336	-0.10962	0.225306	0.189412	-0.0314117	-0.479095		-0.566515	-0.463524	0.358577		-0.406303
1820	0.224311	0.0736252	-0.0980173	-0.110073	0.22535	0.189552	-0.0310466	-0.480093		-0.568998	-0.465007	0.358365		-0.429317
1821	0.224061	0.0735101	-0.0976969	-0.110528	0.225388	0.189689	-0.0306809	-0.481096		-0.571435	-0.466526	0.358142		-0.485195
1822	0.223802	0.0733927	-0.0973726	-0.110984	0.225419	0.189823	-0.0303145	-0.482103		-0.573825	-0.468081	0.357905		-0.4589
1823	0.223535	0.0732731	-0.0970443	-0.11144	0.225442	0.189954	-0.0299478	-0.483114		-0.576168	-0.469671	0.357656		-0.501633
1824	0.22326	0.0731513	-0.0967121	-0.111898	0.225458	0.190082	-0.029581	-0.48413		-0.578463	-0.471294	0.357393		-0.527931
1825	0.222977	0.0730275	-0.096376	-0.112356	0.225468	0.190207	-0.0292143	-0.48515		-0.580712	-0.47295	0.357115		-0.51149
1826	0.222686	0.0729017	-0.096036	-0.112815	0.225471	0.19033	-0.028848	-0.486176		-0.582913	-0.474639	0.356823		-0.426025
1827	0.222386	0.072774	-0.0956922	-0.113274	0.225466	0.19045	-0.0284822	-0.487206		-0.585067	-0.476357	0.356515		-0.4589
1828	0.222078	0.0726446	-0.0953446	-0.113734	0.225456	0.190567	-0.0281173	-0.488241		-0.587174	-0.478106	0.356192		-0.41288
1829	0.221762	0.0725134	-0.0949932	-0.114195	0.225438	0.190682	-0.0277534	-0.489282		-0.589233	-0.479884	0.355852		-0.504917
1830	0.221438	0.0723807	-0.0946382	-0.114656	0.225414	0.190795	-0.0273908	-0.490328		-0.591245	-0.481691	0.355496		-0.508209
1831	0.221105	0.0722466	-0.0942794	-0.115118	0.225383	0.190906	-0.0270298	-0.491379		-0.59321	-0.483524	0.355123		-0.534496
1832	0.220765	0.0721111	-0.093917	-0.11558	0.225346	0.191015	-0.0266706	-0.492436		-0.595129	-0.485384	0.354732		-0.442467
1833	0.220416	0.0719743	-0.0935511	-0.116042	0.225303	0.191122	-0.0263134	-0.493498		-0.597001	-0.48727	0.354324		-0.429317
1834	0.220059	0.0718365	-0.0931816	-0.116505	0.225254	0.191228	-0.0259586	-0.494566		-0.598828	-0.489181	0.353898		-0.4589
1835	0.219694	0.0716977	-0.0928087	-0.116968	0.225198	0.191332	-0.0256063	-0.495639		-0.600609	-0.491117	0.353453		-0.495056
1836	0.219321	0.0715581	-0.0924324	-0.117432	0.225137	0.191434	-0.0252568	-0.496719		-0.602344	-0.493076	0.35299		-0.531212
1837	0.21894	0.0714178	-0.0920528	-0.117895	0.22507	0.191536	-0.0249104	-0.497804		-0.604036	-0.495058	0.352508		-0.51149
1838	0.218552	0.0712769	-0.0916699	-0.118358	0.224997	0.191636	-0.0245674	-0.498895		-0.605682	-0.497063	0.352007		-0.491768
1839	0.218155	0.0711355	-0.0912839	-0.118822	0.224918	0.191736	-0.0242279	-0.499991		-0.607285	-0.499089	0.351487		-0.462189
1840	0.217751	0.0709939	-0.0908948	-0.119286	0.224834	0.191834	-0.0238923	-0.501094		-0.608845	-0.501137	0.350948		-0.432602
1841	0.21734	0.0708521	-0.0905027	-0.119749	0.224746	0.191932	-0.0235609	-0.502202		-0.610362	-0.503205	0.35039		-0.370152
1842	0.21692	0.0707103	-0.0901076	-0.120212	0.224652	0.19203	-0.0232338	-0.503317		-0.611836	-0.505294	0.349811		-0.439178
1843	0.216494	0.0705687	-0.0897098	-0.120676	0.224553	0.192127	-0.0229115	-0.504437		-0.613269	-0.507403	0.349214		-0.416168
1844	0.21606	0.0704273	-0.0893092	-0.121139	0.22445	0.192225	-0.022594	-0.505563		-0.614661	-0.509531	0.348596		-0.403023
1845	0.215619	0.0702864	-0.0889059	-0.121601	0.224342	0.192322	-0.0222818	-0.506695		-0.616013	-0.511679	0.347959		-0.383297
1846	0.215171	0.070146	-0.0885002	-0.122064	0.22423	0.192419	-0.021975	-0.507833		-0.617324	-0.513846	0.347303		-0.43589
1847	0.214716	0.0700064	-0.0880919	-0.122526	0.224115	0.192516	-0.0216739	-0.508977		-0.618597	-0.516031	0.346626		-0.429317
1848	0.214255	0.0698675	-0.0876814	-0.122988	0.223996	0.192614	-0.0213788	-0.510126		-0.619831	-0.518234	0.34593		-0.41288
1849	0.213786	0.0697297	-0.0872687	-0.12345	0.223873	0.192713	-0.02109	-0.511282		-0.621028	-0.520456	0.345215		-0.449039
1850	0.213312	0.069593	-0.0868538	-0.123911	0.223747	0.192812	-0.0208076	-0.512443		-0.622187	-0.522695	0.344479		-0.527931
1851	0.212831	0.0694575	-0.086437	-0.124372	0.223618	0.192911	-0.0205321	-0.51361		-0.62331	-0.524952	0.343725		-0.583805
1852	0.212344	0.0693234	-0.0860182	-0.124832	0.223487	0.193012	-0.0202635	-0.514782		-0.624397	-0.527226	0.342951		-0.616669
1853	0.21185	0.0691908	-0.0855977	-0.125292	0.223354	0.193113	-0.0200022	-0.51596		-0.625449	-0.529518	0.342158		-0.603527
1854	0.211351	0.0690598	-0.0851756	-0.125751	0.223218	0.193215	-0.0197484	-0.517143		-0.626467	-0.531827	0.341346		-0.537785
1855	0.210847	0.0689306	-0.0847519	-0.12621	0.223081	0.193318	-0.0195024	-0.518332		-0.627451	-0.534153	0.340515		-0.58709
1856	0.210337	0.0688033	-0.0843269	-0.126669	0.222942	0.193423	-0.0192643	-0.519525		-0.628402	-0.536496	0.339666		-0.527931
1857	0.209821	0.0686779	-0.0839005	-0.127127	0.222803	0.193528	-0.0190344	-0.520724		-0.629322	-0.538857	0.338798		-0.442467
1858	0.209301	0.0685547	-0.0834729	-0.127584	0.222662	0.193635	-0.0188129	-0.521928		-0.63021	-0.541235	0.337912		-0.485195
1859	0.208776	0.0684337	-0.0830443	-0.128041	0.222521	0.193743	-0.0186001	-0.523136		-0.631068	-0.54363	0.337008		-0.41946
1860	0.208246	0.068315	-0.0826148	-0.128497	0.22238	0.193853	-0.0183962	-0.524349		-0.631896	-0.546044	0.336087		-0.432602
1861	0.207711	0.0681988	-0.0821845	-0.128953	0.222239	0.193964	-0.0182013	-0.525566		-0.632696	-0.548475	0.335148		-0.41946
1862	0.207172	0.0680851	-0.0817534	-0.129408	0.222099	0.194076	-0.0180158	-0.526788		-0.633467	-0.550924	0.334193		-0.51149
1863	0.20663	0.067974	-0.0813219	-0.129862	0.221959	0.194189	-0.0178398	-0.528013		-0.634211	-0.553392	0.33322		-0.495056
1864	0.206083	0.0678656	-0.0808898	-0.130316	0.221821	0.194304	-0.0176735	-0.529242		-0.634928	-0.555879	0.332231		-0.455612
1865	0.205533	0.06776	-0.0804574	-0.13077	0.221684	0.194421	-0.0175171	-0.530475		-0.635619	-0.558385	0.331226		-0.498344
1866	0.204979	0.0676573	-0.0800248	-0.131223	0.221549	0.194538	-0.0173708	-0.531711		-0.636286	-0.560911	0.330205		-0.550938
1867	0.204422	0.0675575	-0.0795922	-0.131675	0.221416	0.194657	-0.0172348	-0.532949		-0.636929	-0.563456	0.329169		-0.541077
1868	0.203862	0.0674608	-0.0791595	-0.132127	0.221285	0.194778	-0.0171093	-0.534191		-0.637548	-0.566022	0.328118		-0.57394
1869	0.203299	0.0673671	-0.078727	-0.132578	0.221157	0.1949	-0.0169944	-0.535435		-0.638145	-0.568609	0.327052		-0.534496
1870	0.202733	0.0672766	-0.0782948	-0.133028	0.221032	0.195023	-0.0168904	-0.536681		-0.638721	-0.571216	0.325971		-0.432602
1871	0.202165	0.0671893	-0.077863	-0.133478	0.22091	0.195147	-0.0167975	-0.537929		-0.639275	-0.573846	0.324877		-0.442467
1872	0.201595	0.0671053	-0.0774317	-0.133928	0.220792	0.195272	-0.0167157	-0.539179		-0.639809	-0.576497	0.323769		-0.409595
1873	0.201023	0.0670245	-0.0770011	-0.134376	0.220677	0.195399	-0.0166452	-0.54043		-0.640324	-0.579171	0.322647		-0.383297
1874	0.200449	0.0669471	-0.0765712	-0.134825	0.220567	0.195527	-0.0165863	-0.541682		-0.64082	-0.581868	0.321513		-0.452324
1875	0.199874	0.0668732	-0.0761423	-0.135272	0.220461	0.195656	-0.0165389	-0.542934		-0.641298	-0.584587	0.320367		-0.478622
1876	0.199297	0.0668026	-0.0757144	-0.135719	0.22036	0.195786	-0.0165034	-0.544187		-0.641757	-0.587331	0.319209		-0.429317
1877	0.198718	0.0667354	-0.0752877	-0.136166	0.220264	0.195916	-0.0164798	-0.545441		-0.6422	-0.590099	0.318039		-0.426025
1878	0.198139	0.0666718	-0.0748624	-0.136612	0.220173	0.196048	-0.0164681	-0.546693		-0.642626	-0.592891	0.316858		-0.455612
1879	0.197559	0.0666116	-0.0744384	-0.137057	0.220087	0.196181	-0.0164687	-0.547946		-0.643035	-0.595708	0.315667		-0.475334
1880	0.196978	0.0665549	-0.0740161	-0.137501	0.220007	0.196314	-0.0164814	-0.549197		-0.643428	-0.59855	0.314466		-0.498344
1881	0.196396	0.0665017	-0.0735954	-0.137945	0.219932	0.196448	-0.0165065	-0.550447		-0.643806	-0.601417	0.313255		-0.333996
1882	0.195814	0.0664519	-0.0731766	-0.138388	0.219864	0.196583	-0.016544	-0.551696		-0.644169	-0.604311	0.312036		-0.429317
1883	0.195232	0.0664057	-0.0727597	-0.13883	0.219802	0.196718	-0.0165939	-0.552943		-0.644516	-0.60723	0.310808		-0.491768
1884	0.194649	0.066363	-0.0723449	-0.139271	0.219747	0.196854	-0.0166564	-0.554187		-0.644849	-0.610176	0.309573		-0.347137
1885	0.194066	0.0663238	-0.0719322	-0.139712	0.219698	0.19699	-0.0167316	-0.555429		-0.645167	-0.613148	0.30833		-0.37344
1886	0.193484	0.066288	-0.0715219	-0.140151	0.219655	0.197127	-0.0168193	-0.556668		-0.645472	-0.616147	0.307081		-0.366859
1887	0.192901	0.0662557	-0.0711141	-0.140589	0.21962	0.197264	-0.0169198	-0.557904		-0.645763	-0.619173	0.305826		-0.370152
1888	0.192319	0.0662268	-0.0707088	-0.141027	0.219592	0.197401	-0.017033	-0.559136		-0.64604	-0.622226	0.304565		-0.409595
1889	0.191737	0.0662012	-0.0703061	-0.141463	0.219571	0.197539	-0.017159	-0.560364		-0.646304	-0.625306	0.303299		-0.399738
1890	0.191156	0.066179	-0.0699063	-0.141898	0.219557	0.197677	-0.0172978	-0.561587		-0.646555	-0.628414	0.30203		-0.455612
1891	0.190575	0.0661602	-0.0695093	-0.142331	0.219551	0.197815	-0.0174494	-0.562806		-0.646794	-0.631549	0.300757		-0.527931
1892	0.189995	0.0661445	-0.0691154	-0.142763	0.219552	0.197953	-0.0176138	-0.564019		-0.64702	-0.634712	0.299481		-0.485195
1893	0.189415	0.066132	-0.0687246	-0.143194	0.219561	0.198092	-0.017791	-0.565228		-0.647235	-0.637903	0.298202		-0.534496
1894	0.188836	0.0661227	-0.0683369	-0.143623	0.219577	0.19823	-0.017981	-0.56643		-0.647438	-0.641123	0.296922		-0.580517
1895	0.188258	0.0661164	-0.0679526	-0.144051	0.219601	0.198368	-0.0181837	-0.567626		-0.64763	-0.644372	0.295641		-0.580517
1896	0.187681	0.0661132	-0.0675717	-0.144477	0.219632	0.198506	-0.0183992	-0.568815		-0.647811	-0.64765	0.29436		-0.593662
1897	0.187104	0.0661129	-0.0671942	-0.144901	0.219671	0.198645	-0.0186275	-0.569998		-0.647982	-0.650957	0.293079		-0.521355
1898	0.186528	0.0661154	-0.0668203	-0.145324	0.219718	0.198782	-0.0188683	-0.571173		-0.648143	-0.654294	0.291798		-0.6101
1899	0.185953	0.0661208	-0.06645	-0.145744	0.219771	0.19892	-0.0191218	-0.57234		-0.648295	-0.657662	0.290519		-0.596951
1900	0.185379	0.066129	-0.0660835	-0.146163	0.219833	0.199058	-0.0193879	-0.573499		-0.648438	-0.66106	0.289242		-0.613388
1901	0.184805	0.0661398	-0.0657207	-0.146579	0.219901	0.199195	-0.0196664	-0.57465		-0.648572	-0.664489	0.287967		-0.577229
1902	0.184232	0.0661532	-0.0653618	-0.146994	0.219977	0.199332	-0.0199574	-0.575792		-0.648699	-0.667949	0.286695		-0.590382
1903	0.18366	0.0661692	-0.0650068	-0.147406	0.22006	0.199468	-0.0202608	-0.576925		-0.648817	-0.671442	0.285427		-0.65612
1904	0.183089	0.0661876	-0.0646558	-0.147816	0.22015	0.199604	-0.0205764	-0.578047		-0.648928	-0.674966	0.284163		-0.636391
1905	0.182518	0.0662085	-0.0643089	-0.148224	0.220247	0.19974	-0.0209043	-0.57916		-0.649032	-0.678523	0.282903		-0.646255
1906	0.181947	0.0662316	-0.063966	-0.14863	0.22035	0.199875	-0.0212443	-0.580262		-0.649129	-0.682112	0.281649		-0.580517
1907	0.181377	0.066257	-0.0636273	-0.149033	0.220459	0.200009	-0.0215963	-0.581353		-0.649219	-0.685735	0.2804		-0.702133
1908	0.180808	0.0662845	-0.0632927	-0.149434	0.220575	0.200143	-0.0219601	-0.582433		-0.649302	-0.689391	0.279158		-0.665977
1909	0.180239	0.0663141	-0.0629624	-0.149832	0.220697	0.200276	-0.0223358	-0.583501		-0.64938	-0.693081	0.277922		-0.626534
1910	0.179669	0.0663456	-0.0626362	-0.150227	0.220825	0.200408	-0.0227231	-0.584557		-0.649451	-0.696805	0.276693		-0.692276
1911	0.1791	0.066379	-0.0623143	-0.15062	0.220958	0.200539	-0.0231219	-0.5856		-0.649516	-0.700564	0.275471		-0.649544
1912	0.178532	0.0664142	-0.0619967	-0.151011	0.221097	0.20067	-0.0235321	-0.586629		-0.649575	-0.704357	0.274257		-0.665977
1913	0.177963	0.0664511	-0.0616834	-0.151398	0.221241	0.200799	-0.0239536	-0.587646		-0.649629	-0.708185	0.273052		-0.679123
1914	0.177393	0.0664895	-0.0613744	-0.151782	0.221389	0.200928	-0.0243861	-0.588648		-0.649676	-0.712048	0.271856		-0.626534
1915	0.176824	0.0665293	-0.0610697	-0.152164	0.221542	0.201055	-0.0248295	-0.589636		-0.649719	-0.715947	0.270668		-0.629822
1916	0.176254	0.0665705	-0.0607692	-0.152542	0.221699	0.201181	-0.0252836	-0.590608		-0.649756	-0.719882	0.26949		-0.70871
1917	0.175684	0.066613	-0.0604731	-0.152917	0.22186	0.201306	-0.0257483	-0.591566		-0.649787	-0.723852	0.268322		-0.692276
1918	0.175114	0.0666565	-0.0601811	-0.153289	0.222025	0.201429	-0.0262234	-0.592507		-0.649814	-0.727858	0.267165		-0.669266
1919	0.174542	0.0667011	-0.0598935	-0.153658	0.222193	0.201551	-0.0267087	-0.593433		-0.649835	-0.731901	0.266018		-0.751442
1920	0.17397	0.0667466	-0.05961	-0.154023	0.222365	0.201671	-0.0272039	-0.594341		-0.649851	-0.73598	0.264881		-0.767868
1921	0.173398	0.0667928	-0.0593307	-0.154385	0.222539	0.201789	-0.0277089	-0.595233		-0.649862	-0.740096	0.263757		-0.774452
1922	0.172824	0.0668397	-0.0590555	-0.154743	0.222716	0.201906	-0.0282233	-0.596107		-0.649867	-0.744248	0.262643		-0.797455
1923	0.172249	0.0668871	-0.0587844	-0.155097	0.222895	0.20202	-0.0287471	-0.596963		-0.649868	-0.748438	0.261542		-0.751442
1924	0.171674	0.0669349	-0.0585173	-0.155448	0.223077	0.202133	-0.02928	-0.5978		-0.649863	-0.752665	0.260453		-0.843475
1925	0.171097	0.066983	-0.0582541	-0.155795	0.22326	0.202243	-0.0298216	-0.598619		-0.649854	-0.756929	0.259376		-0.83033
1926	0.170519	0.0670313	-0.0579947	-0.156138	0.223445	0.202351	-0.0303719	-0.599419		-0.649839	-0.76123	0.258312		-0.833611
1927	0.16994	0.0670795	-0.0577391	-0.156476	0.223631	0.202456	-0.0309304	-0.600199		-0.64982	-0.765569	0.257261		-0.935509
1928	0.16936	0.0671277	-0.0574872	-0.156811	0.223818	0.202559	-0.0314969	-0.60096		-0.649795	-0.769946	0.256223		-0.820473
1929	0.168778	0.0671756	-0.0572388	-0.157142	0.224006	0.202659	-0.0320711	-0.6017		-0.649766	-0.77436	0.255198		-0.879631
1930	0.168195	0.0672232	-0.0569938	-0.157468	0.224195	0.202756	-0.0326528	-0.60242		-0.649732	-0.778811	0.254187		-0.899353
1931	0.16761	0.0672702	-0.0567522	-0.15779	0.224384	0.202851	-0.0332417	-0.603118		-0.649694	-0.7833	0.253189		-0.958519
1932	0.167024	0.0673166	-0.0565137	-0.158108	0.224574	0.202942	-0.0338374	-0.603796		-0.64965	-0.787827	0.252205		-0.942085
1933	0.166436	0.0673623	-0.0562783	-0.158421	0.224764	0.20303	-0.0344397	-0.604452		-0.649602	-0.792391	0.251236		-1.02754
1934	0.165847	0.067407	-0.0560458	-0.15873	0.224953	0.203114	-0.0350482	-0.605087		-0.649549	-0.796992	0.25028		-1.07356
1935	0.165256	0.0674508	-0.0558161	-0.159034	0.225143	0.203195	-0.0356625	-0.6057		-0.649492	-0.801631	0.249339		-1.01768
1936	0.164664	0.0674934	-0.055589	-0.159334	0.225332	0.203272	-0.0362825	-0.606291		-0.64943	-0.806307	0.248412		-1.03412
1937	0.164069	0.0675348	-0.0553643	-0.159629	0.22552	0.203346	-0.0369077	-0.60686		-0.649364	-0.811019	0.247499		-1.13602
1938	0.163473	0.0675748	-0.055142	-0.15992	0.225708	0.203415	-0.0375378	-0.607406		-0.649293	-0.815769	0.246602		-1.12944
1939	0.162875	0.0676133	-0.0549218	-0.160206	0.225895	0.203481	-0.0381724	-0.60793		-0.649219	-0.820555	0.245718		-1.12615
1940	0.162276	0.0676503	-0.0547035	-0.160487	0.22608	0.203542	-0.0388113	-0.608432		-0.64914	-0.825377	0.24485		-1.12286
1941	0.161674	0.0676855	-0.0544871	-0.160764	0.226265	0.2036	-0.039454	-0.60891		-0.649059	-0.830235	0.243997		-1.15245
1942	0.161071	0.0677189	-0.0542722	-0.161036	0.226448	0.203652	-0.0401002	-0.609367		-0.648974	-0.835128	0.243158		-1.14587
1943	0.160466	0.0677504	-0.0540588	-0.161303	0.226629	0.203701	-0.0407496	-0.6098		-0.648886	-0.840057	0.242335		-1.20504
1944	0.159859	0.06778	-0.0538467	-0.161565	0.22681	0.203745	-0.0414017	-0.610211		-0.648797	-0.84502	0.241527		-1.26421
1945	0.159249	0.0678074	-0.0536356	-0.161823	0.226988	0.203784	-0.0420562	-0.610599		-0.648706	-0.850018	0.240734		-1.20833
1946	0.158638	0.0678327	-0.0534254	-0.162076	0.227164	0.203819	-0.0427128	-0.610964		-0.648613	-0.85505	0.239957		-1.16231
1947	0.158026	0.0678557	-0.0532159	-0.162324	0.227338	0.203848	-0.0433711	-0.611307		-0.648521	-0.860114	0.239195		-1.13273
1948	0.157411	0.0678763	-0.053007	-0.162568	0.227511	0.203873	-0.0440307	-0.611627		-0.648429	-0.865211	0.238449		-1.17217
1949	0.156794	0.0678946	-0.0527984	-0.162807	0.22768	0.203893	-0.0446913	-0.611925		-0.648337	-0.87034	0.237719		-1.16231
1950	0.156175	0.0679103	-0.0525899	-0.163042	0.227848	0.203908	-0.0453524	-0.612201		-0.648248	-0.875499	0.237004		-1.18861
1951	0.155554	0.0679235	-0.0523815	-0.163272	0.228012	0.203917	-0.0460138	-0.612454		-0.648162	-0.880688	0.236304		-1.17875
1952	0.154931	0.067934	-0.0521728	-0.163498	0.228174	0.203922	-0.046675	-0.612686		-0.648079	-0.885905	0.235621		-1.20176
1953	0.154306	0.0679418	-0.0519638	-0.163719	0.228333	0.203921	-0.0473357	-0.612896		-0.648	-0.89115	0.234953		-1.26093
1954	0.153679	0.0679469	-0.0517542	-0.163937	0.228489	0.203914	-0.0479956	-0.613084		-0.647927	-0.896421	0.2343		-1.28722
1955	0.153049	0.0679491	-0.051544	-0.164149	0.228642	0.203902	-0.0486542	-0.613251		-0.64786	-0.901717	0.233664		-1.28393
1956	0.152418	0.0679484	-0.0513328	-0.164358	0.228792	0.203885	-0.0493112	-0.613398		-0.6478	-0.907037	0.233042		-1.34638
1957	0.151785	0.0679448	-0.0511205	-0.164563	0.228938	0.203862	-0.0499664	-0.613523		-0.647747	-0.91238	0.232436		-1.37267
1958	0.15115	0.0679381	-0.050907	-0.164763	0.22908	0.203833	-0.0506192	-0.613628		-0.647703	-0.917743	0.231845		-1.45157
1959	0.150512	0.0679285	-0.0506922	-0.16496	0.229219	0.203799	-0.0512695	-0.613714		-0.647668	-0.923126	0.23127		-1.50416
1960	0.149873	0.0679157	-0.0504758	-0.165153	0.229353	0.203758	-0.0519168	-0.613779		-0.647643	-0.928528	0.230709		-1.44828
1961	0.149231	0.0678998	-0.0502577	-0.165343	0.229484	0.203712	-0.0525609	-0.613825		-0.647628	-0.933946	0.230163		-1.44499
1962	0.148588	0.0678808	-0.0500377	-0.165528	0.22961	0.203659	-0.0532015	-0.613851		-0.647625	-0.93938	0.229632		-1.49758
1963	0.147943	0.0678585	-0.0498158	-0.165711	0.229732	0.203601	-0.0538382	-0.613859		-0.647633	-0.944827	0.229115		-1.48115
1964	0.147296	0.0678329	-0.0495917	-0.16589	0.229849	0.203536	-0.0544708	-0.613849		-0.647655	-0.950288	0.228612		-1.37926
1965	0.146647	0.0678041	-0.0493653	-0.166065	0.229962	0.203465	-0.0550989	-0.61382		-0.64769	-0.955759	0.228124		-1.45814
1966	0.145996	0.0677719	-0.0491366	-0.166238	0.23007	0.203388	-0.0557223	-0.613774		-0.64774	-0.96124	0.227649		-1.51402
1967	0.145344	0.0677364	-0.0489053	-0.166407	0.230173	0.203304	-0.0563407	-0.613711		-0.647805	-0.966729	0.227188		-1.53374
1968	0.14469	0.0676976	-0.0486712	-0.166574	0.230271	0.203214	-0.0569538	-0.61363		-0.647885	-0.972225	0.22674		-1.50416
1969	0.144035	0.0676553	-0.0484344	-0.166737	0.230364	0.203117	-0.0575613	-0.613533		-0.647982	-0.977726	0.226304		-1.50744
1970	0.143378	0.0676097	-0.0481946	-0.166898	0.230452	0.203013	-0.058163	-0.61342		-0.648097	-0.98323	0.225882		-1.4943
1971	0.14272	0.0675608	-0.0479518	-0.167057	0.230534	0.202903	-0.0587586	-0.613291		-0.648229	-0.988735	0.225472		-1.46143
1972	0.142061	0.0675085	-0.0477057	-0.167212	0.23061	0.202786	-0.0593479	-0.613147		-0.648379	-0.994241	0.225074		-1.46471
1973	0.1414	0.0674529	-0.0474563	-0.167366	0.230681	0.202663	-0.0599306	-0.612988		-0.648548	-0.999746	0.224688		-1.46471
1974	0.140739	0.067394	-0.0472034	-0.167517	0.230746	0.202533	-0.0605065	-0.612815		-0.648736	-1.00525	0.224313		-1.55346
1975	0.140076	0.0673318	-0.0469469	-0.167666	0.230805	0.202396	-0.0610753	-0.612627		-0.648944	-1.01074	0.223949		-1.47786
1976	0.139413	0.0672664	-0.0466867	-0.167812	0.230857	0.202252	-0.0616368	-0.612426		-0.649172	-1.01624	0.223595		-1.45486
1977	0.138749	0.0671978	-0.0464227	-0.167957	0.230904	0.202101	-0.0621907	-0.612212		-0.64942	-1.02172	0.223252		-1.49101
1978	0.138084	0.0671261	-0.0461547	-0.1681	0.230943	0.201944	-0.062737	-0.611985		-0.649688	-1.02719	0.222918		-1.48444
1979	0.137419	0.0670513	-0.0458826	-0.168241	0.230976	0.20178	-0.0632753	-0.611745		-0.649978	-1.03265	0.222593		-1.48772
1980	0.136753	0.0669736	-0.0456063	-0.16838	0.231003	0.201609	-0.0638055	-0.611494		-0.650287	-1.0381	0.222278		-1.5699
1981	0.136086	0.0668928	-0.0453258	-0.168517	0.231022	0.201432	-0.0643275	-0.611231		-0.650618	-1.04353	0.22197		-1.59948
1982	0.13542	0.0668093	-0.0450408	-0.168653	0.231034	0.201248	-0.064841	-0.610957		-0.65097	-1.04894	0.22167		-1.68166
1983	0.134753	0.0667229	-0.0447513	-0.168788	0.231039	0.201057	-0.0653458	-0.610673		-0.651343	-1.05434	0.221378		-1.66522
1984	0.134085	0.0666338	-0.0444572	-0.168922	0.231036	0.200859	-0.065842	-0.610378		-0.651737	-1.05971	0.221093		-1.62577
1985	0.133418	0.0665422	-0.0441584	-0.169054	0.231026	0.200655	-0.0663292	-0.610074		-0.652151	-1.06506	0.220814		-1.69809
1986	0.132751	0.066448	-0.0438548	-0.169185	0.231007	0.200445	-0.0668075	-0.609761		-0.652587	-1.07038	0.220541		-1.64879
1987	0.132083	0.0663513	-0.0435463	-0.169315	0.230981	0.200228	-0.0672766	-0.609439		-0.653044	-1.07568	0.220273		-1.60605
1988	0.131416	0.0662524	-0.0432328	-0.169444	0.230947	0.200005	-0.0677366	-0.609108		-0.65352	-1.08095	0.220011		-1.68166
1989	0.130749	0.0661512	-0.0429142	-0.169573	0.230904	0.199775	-0.0681872	-0.60877		-0.654018	-1.08619	0.219753		-1.71124
1990	0.130082	0.0660479	-0.0425905	-0.169701	0.230853	0.19954	-0.0686285	-0.608425		-0.654535	-1.09139	0.219499		-1.61591
1991	0.129415	0.0659425	-0.0422615	-0.169828	0.230793	0.199298	-0.0690602	-0.608072		-0.655073	-1.09656	0.219249		-1.63892
1992	0.128748	0.0658352	-0.0419271	-0.169955	0.230725	0.19905	-0.0694825	-0.607714		-0.655629	-1.1017	0.219003		-1.60277
1993	0.128082	0.0657261	-0.0415874	-0.170081	0.230647	0.198796	-0.0698952	-0.607349		-0.656206	-1.10679	0.218759		-1.65207
1994	0.127416	0.0656153	-0.0412421	-0.170207	0.230561	0.198536	-0.0702982	-0.606979		-0.656801	-1.11185	0.218519		-1.63564
1995	0.126751	0.0655029	-0.0408913	-0.170333	0.230465	0.19827	-0.0706915	-0.606603		-0.657414	-1.11686	0.21828		-1.65865
1996	0.126086	0.065389	-0.0405347	-0.170459	0.23036	0.197999	-0.0710751	-0.606224		-0.658046	-1.12183	0.218044		-1.68822
1997	0.125421	0.0652738	-0.0401725	-0.170585	0.230245	0.197722	-0.0714489	-0.60584		-0.658695	-1.12675	0.217809		-1.69809
[truncated: 13,004 more rows]
