# Supplementary material for: Neural circuit mechanisms for transforming learned olfactory valences into wind-oriented movement
Source: eLife. 2023 Sep 18;12:e85756. doi: 10.7554/eLife.85756 (PMC10588983; doi:10.7554/eLife.85756)
Supplement: Figure 4—source data 2. [file elife-85756-fig4-data2.xlsx]

## Sheet: Sheet1
	Baseline-subtracted membrane potentials (mV)
	Gray														Orange
Time (x10^-4) (sec)	Fly1	Fly2	Fly3	Fly4	Fly5	Fly6	Fly7	Fly8	Fly9	Fly10	Fly11	Fly12	Fly13		Fly1	Fly2	Fly3	Fly4
1	0.0518844	-0.0113067	0.00052019	0.0720617	0.23956	0.00637935	-0.25805	0.0859034	0.185306	0.0147745	-0.93043	0.354118	0.034951		-0.150483	-0.0840842	0.0712158	0.33206
2	0.0518884	-0.0105997	0.000769709	0.0723953	0.239994	0.00652364	-0.257895	0.0862327	0.185058	0.015948	-0.93066	0.354441	0.0343582		-0.150463	-0.0838792	0.0706947	0.333752
3	0.0518927	-0.00989374	0.00102529	0.0727241	0.240423	0.00666472	-0.257747	0.086573	0.184806	0.017122	-0.930884	0.354759	0.0337723		-0.150447	-0.0836802	0.070174	0.33536
4	0.0518976	-0.00918907	0.00128699	0.0730484	0.240847	0.00680268	-0.257605	0.0869241	0.18455	0.018296	-0.931102	0.355073	0.0331931		-0.150432	-0.0834876	0.0696538	0.336884
5	0.0519034	-0.00848576	0.00155487	0.0733682	0.241267	0.0069376	-0.25747	0.0872857	0.184288	0.0194697	-0.931315	0.355382	0.0326206		-0.150421	-0.0833017	0.0691341	0.338322
6	0.0519103	-0.00778391	0.00182901	0.0736837	0.241683	0.00706959	-0.257342	0.0876576	0.184022	0.020643	-0.931521	0.355685	0.0320547		-0.150412	-0.0831226	0.0686151	0.339674
7	0.0519186	-0.00708364	0.00210946	0.0739952	0.242095	0.00719874	-0.257219	0.0880395	0.183751	0.0218155	-0.931721	0.355984	0.0314953		-0.150404	-0.0829506	0.0680966	0.340938
8	0.0519286	-0.00638504	0.00239631	0.0743028	0.242504	0.00732514	-0.257102	0.0884312	0.183474	0.0229869	-0.931914	0.356277	0.0309422		-0.150399	-0.0827859	0.0675788	0.342113
9	0.0519406	-0.00568824	0.00268961	0.0746068	0.242909	0.00744889	-0.256991	0.0888323	0.183192	0.0241569	-0.9321	0.356565	0.0303952		-0.150396	-0.0826288	0.0670617	0.3432
10	0.0519547	-0.00499334	0.00298944	0.0749073	0.243313	0.00757011	-0.256884	0.0892426	0.182905	0.0253252	-0.932279	0.356848	0.0298541		-0.150395	-0.0824795	0.0665453	0.344198
11	0.0519714	-0.00430047	0.00329588	0.0752046	0.243714	0.00768889	-0.256782	0.0896617	0.182611	0.0264915	-0.93245	0.357126	0.0293185		-0.150394	-0.0823382	0.0660296	0.345105
12	0.0519908	-0.00360973	0.00360898	0.075499	0.244113	0.00780535	-0.256685	0.0900892	0.182312	0.0276554	-0.932613	0.357399	0.028788		-0.150396	-0.082205	0.0655147	0.345923
13	0.0520131	-0.00292126	0.00392883	0.0757905	0.24451	0.00791962	-0.256592	0.0905248	0.182006	0.0288166	-0.932768	0.357666	0.0282624		-0.150398	-0.0820802	0.0650006	0.34665
14	0.0520387	-0.00223517	0.00425549	0.0760794	0.244907	0.00803182	-0.256502	0.090968	0.181694	0.0299748	-0.932915	0.357928	0.0277411		-0.150401	-0.081964	0.0644872	0.347287
15	0.0520677	-0.00155158	0.00458903	0.0763661	0.245303	0.00814208	-0.256416	0.0914186	0.181375	0.0311297	-0.933054	0.358184	0.0272236		-0.150405	-0.0818565	0.0639747	0.347833
16	0.0521003	-0.000870627	0.0049295	0.0766506	0.245699	0.00825056	-0.256333	0.091876	0.181049	0.0322808	-0.933184	0.358436	0.0267092		-0.150409	-0.0817578	0.063463	0.348289
17	0.0521368	-0.000192428	0.00527696	0.0769331	0.246095	0.0083574	-0.256253	0.0923399	0.180716	0.033428	-0.933306	0.358682	0.0261973		-0.150414	-0.0816682	0.0629521	0.348655
18	0.0521773	0.000482894	0.00563148	0.0772141	0.246492	0.00846274	-0.256175	0.0928098	0.180375	0.0345708	-0.933419	0.358923	0.0256873		-0.150419	-0.0815877	0.0624421	0.348932
19	0.0522221	0.00115522	0.0059931	0.0774935	0.246889	0.00856676	-0.256098	0.0932853	0.180027	0.035709	-0.933523	0.359159	0.0251782		-0.150424	-0.0815164	0.0619329	0.34912
20	0.0522714	0.00182442	0.00636189	0.0777717	0.247288	0.00866961	-0.256024	0.0937659	0.179671	0.0368421	-0.933618	0.359389	0.0246693		-0.150428	-0.0814545	0.0614246	0.349219
21	0.0523253	0.0024904	0.00673789	0.0780489	0.247689	0.00877146	-0.255951	0.0942512	0.179308	0.03797	-0.933704	0.359615	0.0241598		-0.150432	-0.081402	0.0609172	0.34923
22	0.052384	0.00315302	0.00712117	0.0783254	0.248092	0.00887248	-0.255879	0.0947406	0.178936	0.0390923	-0.93378	0.359835	0.0236487		-0.150436	-0.0813591	0.0604107	0.349154
23	0.0524476	0.00381217	0.00751176	0.0786013	0.248497	0.00897282	-0.255807	0.0952337	0.178555	0.0402087	-0.933848	0.360051	0.0231351		-0.150439	-0.0813257	0.0599052	0.348992
24	0.0525163	0.00446775	0.00790972	0.0788769	0.248906	0.00907267	-0.255736	0.09573	0.178166	0.0413189	-0.933907	0.360261	0.022618		-0.150441	-0.0813019	0.0594006	0.348744
25	0.0525902	0.00511965	0.0083151	0.0791524	0.249317	0.00917218	-0.255664	0.096229	0.177768	0.0424227	-0.933957	0.360466	0.0220962		-0.150441	-0.0812877	0.0588969	0.348412
26	0.0526693	0.00576776	0.00872791	0.0794281	0.249733	0.00927152	-0.255592	0.0967301	0.177361	0.0435197	-0.933997	0.360667	0.0215686		-0.15044	-0.0812833	0.0583943	0.347996
27	0.0527539	0.00641197	0.00914819	0.0797042	0.250152	0.00937085	-0.255519	0.0972329	0.176945	0.0446097	-0.934029	0.360862	0.0210341		-0.150438	-0.0812884	0.0578927	0.347498
28	0.052844	0.0070522	0.00957594	0.079981	0.250576	0.00947033	-0.255445	0.0977368	0.176519	0.0456924	-0.934052	0.361053	0.0204916		-0.150433	-0.0813033	0.0573921	0.346919
29	0.0529395	0.00768835	0.0100112	0.0802586	0.251005	0.0095701	-0.25537	0.0982413	0.176084	0.0467677	-0.934066	0.361238	0.0199397		-0.150427	-0.0813277	0.0568926	0.346259
30	0.0530406	0.00832032	0.0104539	0.0805374	0.251438	0.00967033	-0.255293	0.0987459	0.175638	0.0478351	-0.934071	0.361419	0.0193773		-0.150418	-0.0813618	0.0563942	0.34552
31	0.0531472	0.00894803	0.0109041	0.0808174	0.251877	0.00977114	-0.255214	0.0992499	0.175183	0.0488946	-0.934068	0.361595	0.0188031		-0.150407	-0.0814054	0.055897	0.344704
32	0.0532594	0.00957141	0.0113617	0.0810991	0.252322	0.0098727	-0.255132	0.099753	0.174717	0.0499459	-0.934057	0.361767	0.0182158		-0.150394	-0.0814584	0.055401	0.343811
33	0.0533772	0.0101904	0.0118267	0.0813825	0.252773	0.00997514	-0.255048	0.100254	0.17424	0.0509887	-0.934038	0.361934	0.017614		-0.150377	-0.0815209	0.0549063	0.342842
34	0.0535004	0.0108049	0.012299	0.081668	0.253229	0.0100786	-0.254961	0.100754	0.173753	0.0520229	-0.934011	0.362097	0.0169963		-0.150357	-0.0815927	0.0544128	0.341799
35	0.0536291	0.0114148	0.0127787	0.0819557	0.253693	0.0101832	-0.25487	0.10125	0.173255	0.0530483	-0.933977	0.362255	0.0163615		-0.150334	-0.0816736	0.0539207	0.340683
36	0.0537632	0.0120202	0.0132656	0.0822459	0.254163	0.0102891	-0.254777	0.101744	0.172746	0.0540647	-0.933936	0.362409	0.0157081		-0.150308	-0.0817637	0.05343	0.339495
37	0.0539026	0.0126209	0.0137597	0.0825388	0.25464	0.0103963	-0.254679	0.102233	0.172225	0.0550719	-0.933887	0.362559	0.0150348		-0.150278	-0.0818626	0.0529408	0.338237
38	0.0540473	0.013217	0.014261	0.0828347	0.255124	0.0105051	-0.254578	0.102719	0.171693	0.0560698	-0.933832	0.362705	0.0143401		-0.150244	-0.0819704	0.0524531	0.336909
39	0.0541971	0.0138083	0.0147692	0.0831337	0.255616	0.0106155	-0.254472	0.103199	0.17115	0.0570582	-0.933771	0.362847	0.0136227		-0.150207	-0.0820868	0.051967	0.335513
40	0.0543518	0.0143949	0.0152844	0.083436	0.256115	0.0107277	-0.254362	0.103674	0.170594	0.0580369	-0.933704	0.362986	0.0128813		-0.150165	-0.0822115	0.0514825	0.33405
41	0.0545115	0.0149767	0.0158064	0.083742	0.256621	0.0108416	-0.254248	0.104143	0.170027	0.059006	-0.933632	0.363121	0.0121146		-0.150119	-0.0823445	0.0509997	0.332522
42	0.0546758	0.0155538	0.0163352	0.0840517	0.257136	0.0109575	-0.254128	0.104606	0.169447	0.0599652	-0.933555	0.363253	0.0113213		-0.150068	-0.0824855	0.0505186	0.330929
43	0.0548447	0.016126	0.0168705	0.0843655	0.257658	0.0110753	-0.254004	0.105062	0.168854	0.0609144	-0.933473	0.363381	0.0105002		-0.150012	-0.0826342	0.0500394	0.329273
44	0.055018	0.0166934	0.0174123	0.0846836	0.258188	0.0111952	-0.253875	0.105511	0.16825	0.0618536	-0.933387	0.363507	0.00965014		-0.149952	-0.0827904	0.0495621	0.327555
45	0.0551955	0.0172561	0.0179605	0.0850062	0.258727	0.0113173	-0.25374	0.105952	0.167632	0.0627826	-0.933296	0.36363	0.00876998		-0.149887	-0.0829539	0.0490869	0.325776
46	0.0553769	0.017814	0.0185148	0.0853334	0.259273	0.0114415	-0.2536	0.106385	0.167001	0.0637014	-0.933203	0.363751	0.00785855		-0.149817	-0.0831242	0.0486137	0.323938
47	0.0555622	0.0183671	0.0190751	0.0856655	0.259828	0.0115681	-0.253454	0.106809	0.166358	0.06461	-0.933106	0.36387	0.00691478		-0.149742	-0.0833012	0.0481427	0.322041
48	0.0557509	0.0189155	0.0196413	0.0860028	0.26039	0.0116969	-0.253302	0.107224	0.1657	0.0655083	-0.933007	0.363986	0.00593759		-0.149662	-0.0834845	0.047674	0.320087
49	0.055943	0.0194592	0.0202132	0.0863453	0.260961	0.0118281	-0.253144	0.107629	0.16503	0.0663962	-0.932906	0.364101	0.00492595		-0.149576	-0.0836738	0.0472077	0.318077
50	0.0561382	0.0199981	0.0207906	0.0866933	0.26154	0.0119617	-0.252981	0.108025	0.164346	0.0672738	-0.932803	0.364214	0.00387886		-0.149485	-0.0838688	0.0467438	0.316013
51	0.0563361	0.0205325	0.0213732	0.087047	0.262127	0.0120977	-0.252811	0.108411	0.163648	0.0681409	-0.932699	0.364326	0.00279539		-0.149388	-0.084069	0.0462826	0.313896
52	0.0565366	0.0210622	0.0219609	0.0874066	0.262722	0.0122362	-0.252635	0.108787	0.162936	0.0689977	-0.932594	0.364438	0.00167463		-0.149286	-0.0842742	0.045824	0.311727
53	0.0567394	0.0215874	0.0225535	0.0877723	0.263325	0.0123772	-0.252452	0.109151	0.162211	0.0698441	-0.932488	0.364548	0.000515745		-0.149179	-0.084484	0.0453682	0.309508
54	0.0569441	0.0221081	0.0231506	0.0881442	0.263936	0.0125207	-0.252263	0.109505	0.161471	0.0706801	-0.932383	0.364659	-0.000682027		-0.149066	-0.0846979	0.0449154	0.30724
55	0.0571505	0.0226244	0.0237521	0.0885226	0.264554	0.0126667	-0.252067	0.109847	0.160717	0.0715057	-0.932278	0.364769	-0.0019194		-0.148947	-0.0849157	0.0444655	0.304925
56	0.0573583	0.0231363	0.0243577	0.0889075	0.26518	0.0128151	-0.251865	0.110178	0.159949	0.072321	-0.932175	0.364879	-0.00319703		-0.148823	-0.085137	0.0440188	0.302564
57	0.0575672	0.0236439	0.0249672	0.0892992	0.265813	0.012966	-0.251655	0.110497	0.159166	0.0731259	-0.932073	0.36499	-0.00451552		-0.148693	-0.0853613	0.0435753	0.300158
58	0.0577769	0.0241473	0.0255804	0.0896979	0.266453	0.0131194	-0.251439	0.110804	0.158369	0.0739206	-0.931973	0.365102	-0.0058754		-0.148558	-0.0855884	0.0431351	0.29771
59	0.057987	0.0246465	0.0261969	0.0901038	0.2671	0.0132752	-0.251216	0.111099	0.157558	0.0747051	-0.931876	0.365216	-0.00727714		-0.148418	-0.0858177	0.0426983	0.29522
60	0.0581974	0.0251417	0.0268164	0.0905169	0.267755	0.0134334	-0.250986	0.111381	0.156732	0.0754794	-0.931783	0.36533	-0.0087211		-0.148272	-0.086049	0.0422649	0.292691
61	0.0584075	0.025633	0.0274389	0.0909375	0.268415	0.0135939	-0.250748	0.111651	0.155891	0.0762436	-0.931693	0.365446	-0.0102076		-0.14812	-0.0862819	0.0418351	0.290122
62	0.0586172	0.0261203	0.0280638	0.0913657	0.269082	0.0137567	-0.250504	0.111908	0.155036	0.0769977	-0.931607	0.365565	-0.0117369		-0.147964	-0.086516	0.041409	0.287517
63	0.0588261	0.0266039	0.0286911	0.0918017	0.269755	0.0139218	-0.250252	0.112153	0.154166	0.0777417	-0.931527	0.365685	-0.013309		-0.147802	-0.0867509	0.0409865	0.284876
64	0.0590338	0.0270838	0.0293203	0.0922457	0.270434	0.014089	-0.249993	0.112384	0.153282	0.0784759	-0.931452	0.365808	-0.0149241		-0.147636	-0.0869863	0.0405678	0.2822
65	0.0592401	0.0275602	0.0299513	0.0926978	0.271118	0.0142584	-0.249727	0.112603	0.152383	0.0792001	-0.931382	0.365934	-0.016582		-0.147465	-0.0872218	0.040153	0.279492
66	0.0594447	0.0280331	0.0305837	0.0931582	0.271807	0.0144298	-0.249454	0.112809	0.15147	0.0799145	-0.93132	0.366064	-0.0182826		-0.147289	-0.0874571	0.0397421	0.276753
67	0.0596472	0.0285027	0.0312172	0.0936271	0.272501	0.0146032	-0.249174	0.113002	0.150542	0.0806191	-0.931265	0.366196	-0.0200256		-0.147108	-0.0876918	0.0393352	0.273985
68	0.0598473	0.028969	0.0318516	0.0941046	0.2732	0.0147785	-0.248887	0.113182	0.1496	0.081314	-0.931217	0.366332	-0.0218108		-0.146923	-0.0879256	0.0389323	0.271188
69	0.0600446	0.0294322	0.0324865	0.0945908	0.273902	0.0149555	-0.248592	0.113349	0.148644	0.0819992	-0.931178	0.366472	-0.0236376		-0.146733	-0.0881581	0.0385336	0.268364
70	0.060239	0.0298924	0.0331216	0.0950858	0.274609	0.0151342	-0.248291	0.113504	0.147674	0.0826748	-0.931148	0.366616	-0.0255055		-0.14654	-0.0883892	0.0381391	0.265516
71	0.06043	0.0303497	0.0337567	0.0955899	0.275319	0.0153145	-0.247982	0.113646	0.146689	0.0833408	-0.931128	0.366765	-0.0274142		-0.146342	-0.0886183	0.0377489	0.262644
72	0.0606174	0.0308041	0.0343914	0.0961031	0.276032	0.0154961	-0.247667	0.113775	0.145691	0.0839973	-0.931118	0.366918	-0.029363		-0.146141	-0.0888452	0.037363	0.259751
73	0.0608008	0.0312559	0.0350253	0.0966255	0.276747	0.015679	-0.247344	0.113891	0.144679	0.0846443	-0.93112	0.367076	-0.0313511		-0.145936	-0.0890697	0.0369816	0.256838
74	0.0609801	0.0317052	0.0356582	0.0971573	0.277465	0.0158631	-0.247015	0.113996	0.143653	0.0852819	-0.931133	0.36724	-0.0333781		-0.145728	-0.0892914	0.0366046	0.253906
75	0.0611548	0.032152	0.0362898	0.0976985	0.278185	0.0160481	-0.246679	0.114088	0.142614	0.0859101	-0.931158	0.367408	-0.0354432		-0.145516	-0.08951	0.0362323	0.250958
76	0.0613247	0.0325965	0.0369196	0.0982491	0.278906	0.0162338	-0.246337	0.114168	0.141562	0.0865289	-0.931196	0.367583	-0.0375456		-0.145302	-0.0897253	0.0358647	0.247995
77	0.0614896	0.0330387	0.0375475	0.0988093	0.279628	0.0164202	-0.245988	0.114236	0.140497	0.0871384	-0.931248	0.367763	-0.0396847		-0.145085	-0.089937	0.0355018	0.245018
78	0.0616492	0.033479	0.038173	0.0993792	0.280351	0.016607	-0.245633	0.114293	0.139419	0.0877385	-0.931314	0.36795	-0.0418597		-0.144865	-0.0901448	0.0351437	0.24203
79	0.0618032	0.0339173	0.0387958	0.0999586	0.281074	0.016794	-0.245272	0.114338	0.138328	0.0883294	-0.931395	0.368143	-0.04407		-0.144643	-0.0903484	0.0347906	0.239032
80	0.0619513	0.0343539	0.0394155	0.100548	0.281797	0.0169811	-0.244904	0.114372	0.137225	0.088911	-0.931491	0.368342	-0.0463147		-0.144418	-0.0905477	0.0344425	0.236026
81	0.0620934	0.0347889	0.040032	0.101146	0.282519	0.017168	-0.244531	0.114395	0.13611	0.0894834	-0.931604	0.368549	-0.0485931		-0.144192	-0.0907424	0.0340995	0.233013
82	0.0622292	0.0352224	0.0406447	0.101755	0.28324	0.0173546	-0.244151	0.114408	0.134983	0.0900465	-0.931732	0.368762	-0.0509045		-0.143964	-0.0909321	0.0337616	0.229994
83	0.0623584	0.0356547	0.0412534	0.102373	0.283959	0.0175406	-0.243766	0.11441	0.133844	0.0906003	-0.931878	0.368983	-0.0532481		-0.143735	-0.0911167	0.033429	0.226972
84	0.0624809	0.0360858	0.0418576	0.103	0.284677	0.0177259	-0.243376	0.114403	0.132694	0.0911448	-0.932042	0.369212	-0.055623		-0.143505	-0.0912959	0.0331017	0.223949
85	0.0625963	0.0365161	0.0424572	0.103637	0.285392	0.0179102	-0.242981	0.114385	0.131533	0.0916801	-0.932223	0.369448	-0.0580287		-0.143274	-0.0914695	0.0327797	0.220925
86	0.0627046	0.0369455	0.0430517	0.104284	0.286105	0.0180933	-0.24258	0.114359	0.130361	0.0922061	-0.932423	0.369693	-0.0604641		-0.143042	-0.0916373	0.0324631	0.217902
87	0.0628054	0.0373745	0.0436408	0.10494	0.286815	0.0182751	-0.242175	0.114323	0.129178	0.0927227	-0.932642	0.369946	-0.0629286		-0.14281	-0.0917992	0.032152	0.214882
88	0.0628987	0.037803	0.0442242	0.105605	0.287522	0.0184553	-0.241765	0.114279	0.127986	0.0932301	-0.93288	0.370207	-0.0654212		-0.142578	-0.0919548	0.0318463	0.211866
89	0.0629842	0.0382314	0.0448015	0.106279	0.288224	0.0186337	-0.24135	0.114226	0.126783	0.093728	-0.933138	0.370477	-0.0679412		-0.142346	-0.092104	0.0315463	0.208857
90	0.0630617	0.0386597	0.0453724	0.106963	0.288923	0.0188101	-0.240932	0.114165	0.125571	0.0942165	-0.933416	0.370756	-0.0704877		-0.142114	-0.0922468	0.0312518	0.205855
91	0.0631311	0.0390883	0.0459366	0.107655	0.289618	0.0189844	-0.24051	0.114097	0.124349	0.0946956	-0.933714	0.371043	-0.0730597		-0.141883	-0.0923828	0.030963	0.202862
92	0.0631921	0.0395172	0.0464939	0.108356	0.290308	0.0191562	-0.240084	0.114021	0.123118	0.0951652	-0.934033	0.37134	-0.0756564		-0.141654	-0.0925121	0.0306797	0.199879
93	0.0632448	0.0399468	0.0470438	0.109065	0.290993	0.0193255	-0.239654	0.113938	0.121879	0.0956252	-0.934373	0.371646	-0.0782767		-0.141425	-0.0926343	0.0304022	0.196908
94	0.0632889	0.0403771	0.0475862	0.109782	0.291672	0.0194919	-0.239222	0.113849	0.120632	0.0960757	-0.934734	0.371962	-0.0809197		-0.141198	-0.0927496	0.0301302	0.193952
95	0.0633243	0.0408083	0.0481207	0.110508	0.292347	0.0196554	-0.238787	0.113754	0.119376	0.0965166	-0.935116	0.372287	-0.0835844		-0.140973	-0.0928576	0.029864	0.19101
96	0.0633509	0.0412408	0.0486471	0.111241	0.293015	0.0198158	-0.23835	0.113654	0.118113	0.0969478	-0.935519	0.372622	-0.0862697		-0.14075	-0.0929584	0.0296034	0.188085
97	0.0633687	0.0416745	0.0491651	0.111982	0.293678	0.0199727	-0.23791	0.113548	0.116843	0.0973694	-0.935944	0.372967	-0.0889747		-0.140529	-0.093052	0.0293485	0.185179
98	0.0633775	0.0421098	0.0496744	0.11273	0.294334	0.0201262	-0.237469	0.113437	0.115565	0.0977813	-0.93639	0.373322	-0.0916983		-0.14031	-0.0931381	0.0290992	0.182292
99	0.0633773	0.0425469	0.0501749	0.113485	0.294985	0.0202759	-0.237026	0.113322	0.114281	0.0981834	-0.936857	0.373687	-0.0944396		-0.140094	-0.0932169	0.0288555	0.179427
100	0.063368	0.0429859	0.0506663	0.114247	0.295628	0.0204218	-0.236582	0.113202	0.112991	0.0985758	-0.937345	0.374063	-0.0971974		-0.139881	-0.0932883	0.0286174	0.176585
101	0.0633496	0.0434269	0.0511484	0.115015	0.296265	0.0205635	-0.236138	0.113079	0.111695	0.0989585	-0.937854	0.374448	-0.099971		-0.13967	-0.0933523	0.0283849	0.173767
102	0.063322	0.0438703	0.0516209	0.115789	0.296895	0.0207011	-0.235692	0.112953	0.110393	0.0993315	-0.938385	0.374844	-0.102759		-0.139463	-0.0934089	0.0281578	0.170976
103	0.0632852	0.0443161	0.0520837	0.116569	0.297519	0.0208343	-0.235247	0.112823	0.109087	0.0996947	-0.938936	0.375251	-0.105561		-0.139259	-0.093458	0.0279363	0.168212
104	0.0632391	0.0447645	0.0525365	0.117355	0.298134	0.0209629	-0.234802	0.112692	0.107775	0.100048	-0.939508	0.375668	-0.108376		-0.139058	-0.0934998	0.0277202	0.165476
105	0.0631837	0.0452157	0.0529792	0.118145	0.298743	0.0210869	-0.234358	0.112558	0.106459	0.100392	-0.9401	0.376096	-0.111204		-0.13886	-0.0935343	0.0275095	0.162771
106	0.0631191	0.0456699	0.0534116	0.11894	0.299345	0.021206	-0.233915	0.112423	0.105139	0.100726	-0.940712	0.376534	-0.114042		-0.138665	-0.0935615	0.0273042	0.160098
107	0.0630452	0.0461272	0.0538335	0.119739	0.299938	0.0213201	-0.233473	0.112286	0.103815	0.101051	-0.941344	0.376983	-0.116891		-0.138474	-0.0935815	0.0271041	0.157457
108	0.0629619	0.0465878	0.0542449	0.120543	0.300525	0.0214292	-0.233033	0.112149	0.102488	0.101365	-0.941995	0.377442	-0.119749		-0.138285	-0.0935943	0.0269094	0.154851
109	0.0628694	0.0470518	0.0546454	0.121349	0.301104	0.0215331	-0.232595	0.112011	0.101158	0.101671	-0.942666	0.377912	-0.122617		-0.1381	-0.0936002	0.0267198	0.152281
110	0.0627676	0.0475194	0.0550351	0.122159	0.301675	0.0216316	-0.23216	0.111874	0.099825	0.101967	-0.943355	0.378393	-0.125492		-0.137918	-0.0935991	0.0265353	0.149747
111	0.0626565	0.0479906	0.0554137	0.122972	0.302238	0.0217246	-0.231728	0.111736	0.0984896	0.102253	-0.944063	0.378884	-0.128375		-0.137739	-0.0935912	0.026356	0.147252
112	0.0625362	0.0484657	0.055781	0.123786	0.302794	0.0218122	-0.231299	0.1116	0.0971522	0.102531	-0.944789	0.379385	-0.131265		-0.137562	-0.0935766	0.0261817	0.144795
113	0.0624068	0.0489447	0.0561371	0.124603	0.303342	0.0218941	-0.230874	0.111465	0.0958129	0.102799	-0.945532	0.379897	-0.134161		-0.137389	-0.0935555	0.0260123	0.142379
114	0.0622682	0.0494277	0.0564817	0.125421	0.303883	0.0219702	-0.230454	0.111331	0.0944723	0.103058	-0.946293	0.380419	-0.137062		-0.137219	-0.0935279	0.0258479	0.140004
115	0.0621205	0.049915	0.0568148	0.12624	0.304416	0.0220405	-0.230038	0.1112	0.0931305	0.103308	-0.947071	0.380951	-0.139969		-0.137051	-0.0934942	0.0256884	0.137672
116	0.0619638	0.0504065	0.0571362	0.12706	0.304941	0.0221049	-0.229627	0.111071	0.0917879	0.103549	-0.947864	0.381494	-0.14288		-0.136886	-0.0934544	0.0255336	0.135384
117	0.0617982	0.0509023	0.0574458	0.127879	0.305458	0.0221633	-0.229222	0.110944	0.0904448	0.103782	-0.948674	0.382046	-0.145795		-0.136724	-0.0934087	0.0253835	0.13314
118	0.0616237	0.0514027	0.0577435	0.128699	0.305968	0.0222155	-0.228823	0.110821	0.0891015	0.104006	-0.9495	0.382608	-0.148713		-0.136564	-0.0933573	0.025238	0.130941
119	0.0614405	0.0519076	0.0580292	0.129517	0.30647	0.0222617	-0.22843	0.110702	0.0877583	0.104221	-0.950341	0.38318	-0.151634		-0.136406	-0.0933004	0.0250971	0.128789
120	0.0612486	0.0524172	0.0583029	0.130334	0.306965	0.0223015	-0.228044	0.110586	0.0864154	0.104429	-0.951196	0.383761	-0.154558		-0.136251	-0.0932382	0.0249607	0.126685
121	0.0610481	0.0529314	0.0585644	0.131149	0.307453	0.0223351	-0.227666	0.110475	0.0850732	0.104628	-0.952066	0.384352	-0.157485		-0.136098	-0.093171	0.0248286	0.124629
122	0.0608392	0.0534505	0.0588136	0.131963	0.307932	0.0223622	-0.227294	0.110368	0.0837319	0.10482	-0.95295	0.384951	-0.160412		-0.135946	-0.0930989	0.0247007	0.122622
123	0.060622	0.0539744	0.0590505	0.132773	0.308405	0.0223829	-0.226931	0.110267	0.0823919	0.105003	-0.953847	0.38556	-0.163342		-0.135797	-0.0930221	0.0245771	0.120666
124	0.0603965	0.0545033	0.059275	0.133581	0.30887	0.0223971	-0.226576	0.110171	0.0810534	0.10518	-0.954757	0.386177	-0.166272		-0.135648	-0.092941	0.0244575	0.11876
125	0.060163	0.0550371	0.0594869	0.134385	0.309328	0.0224047	-0.22623	0.11008	0.0797166	0.105349	-0.955681	0.386803	-0.169202		-0.135502	-0.0928558	0.0243419	0.116907
126	0.0599215	0.055576	0.0596862	0.135185	0.309779	0.0224057	-0.225893	0.109996	0.078382	0.105511	-0.956616	0.387437	-0.172133		-0.135356	-0.0927666	0.0242301	0.115106
127	0.0596722	0.0561199	0.0598728	0.135981	0.310223	0.0224	-0.225566	0.109918	0.0770497	0.105666	-0.957564	0.38808	-0.175063		-0.135211	-0.0926737	0.0241221	0.113358
128	0.0594152	0.056669	0.0600466	0.136772	0.31066	0.0223877	-0.225248	0.109847	0.07572	0.105814	-0.958523	0.38873	-0.177992		-0.135067	-0.0925774	0.0240177	0.111665
129	0.0591507	0.0572232	0.0602076	0.137558	0.31109	0.0223685	-0.22494	0.109783	0.0743932	0.105957	-0.959493	0.389387	-0.180921		-0.134924	-0.092478	0.0239169	0.110026
130	0.0588789	0.0577826	0.0603556	0.138339	0.311512	0.0223426	-0.224643	0.109726	0.0730696	0.106092	-0.960474	0.390052	-0.183848		-0.134781	-0.0923756	0.0238195	0.108443
131	0.0585998	0.0583473	0.0604906	0.139113	0.311928	0.0223099	-0.224356	0.109678	0.0717494	0.106222	-0.961465	0.390724	-0.186773		-0.134638	-0.0922706	0.0237255	0.106915
132	0.0583138	0.0589172	0.0606126	0.139882	0.312338	0.0222703	-0.224081	0.109637	0.0704329	0.106346	-0.962467	0.391403	-0.189696		-0.134495	-0.0921631	0.0236346	0.105445
133	0.058021	0.0594923	0.0607213	0.140643	0.31274	0.0222239	-0.223817	0.109604	0.0691204	0.106465	-0.963478	0.392088	-0.192616		-0.134351	-0.0920534	0.0235469	0.104031
134	0.0577215	0.0600727	0.0608168	0.141397	0.313136	0.0221707	-0.223564	0.109581	0.0678121	0.106579	-0.964499	0.39278	-0.195534		-0.134207	-0.0919419	0.0234622	0.102675
135	0.0574157	0.0606584	0.0608991	0.142144	0.313525	0.0221105	-0.223323	0.109566	0.0665083	0.106687	-0.965528	0.393478	-0.198448		-0.134062	-0.0918287	0.0233803	0.101378
136	0.0571036	0.0612494	0.0609679	0.142883	0.313908	0.0220436	-0.223095	0.10956	0.0652093	0.10679	-0.966567	0.394181	-0.201358		-0.133916	-0.0917141	0.0233013	0.100139
137	0.0567856	0.0618456	0.0610234	0.143614	0.314284	0.0219697	-0.222878	0.109564	0.0639153	0.106889	-0.967614	0.39489	-0.204264		-0.133768	-0.0915984	0.0232248	0.0989599
138	0.0564619	0.0624472	0.0610653	0.144337	0.314654	0.021889	-0.222674	0.109578	0.0626266	0.106984	-0.968669	0.395605	-0.207165		-0.133619	-0.0914819	0.023151	0.0978404
139	0.0561327	0.063054	0.0610937	0.14505	0.315017	0.0218016	-0.222483	0.109602	0.0613434	0.107074	-0.969731	0.396324	-0.210062		-0.133468	-0.0913648	0.0230796	0.0967815
140	0.0557982	0.0636662	0.0611084	0.145755	0.315374	0.0217073	-0.222304	0.109636	0.0600661	0.10716	-0.970802	0.397048	-0.212953		-0.133315	-0.0912475	0.0230105	0.0957834
141	0.0554588	0.0642836	0.0611095	0.14645	0.315725	0.0216063	-0.222139	0.109681	0.0587948	0.107243	-0.971879	0.397777	-0.215838		-0.13316	-0.0911302	0.0229436	0.0948467
142	0.0551147	0.0649064	0.0610968	0.147136	0.31607	0.0214987	-0.221986	0.109736	0.0575299	0.107321	-0.972964	0.39851	-0.218716		-0.133002	-0.0910132	0.0228788	0.0939718
143	0.0547663	0.0655344	0.0610703	0.147811	0.316409	0.0213843	-0.221847	0.109802	0.0562717	0.107397	-0.974055	0.399247	-0.221588		-0.132842	-0.0908969	0.0228161	0.0931592
144	0.0544137	0.0661678	0.06103	0.148477	0.316742	0.0212635	-0.221721	0.10988	0.0550203	0.107469	-0.975152	0.399987	-0.224452		-0.132679	-0.0907815	0.0227552	0.0924091
145	0.0540573	0.0668064	0.0609757	0.149132	0.317069	0.0211361	-0.221608	0.109968	0.0537762	0.107539	-0.976256	0.400731	-0.227308		-0.132513	-0.0906672	0.0226962	0.0917218
146	0.0536974	0.0674504	0.0609075	0.149776	0.31739	0.0210024	-0.221508	0.110068	0.0525396	0.107605	-0.977365	0.401478	-0.230155		-0.132343	-0.0905545	0.0226388	0.0910974
147	0.0533343	0.0680996	0.0608252	0.15041	0.317706	0.0208623	-0.221422	0.11018	0.0513108	0.107669	-0.97848	0.402229	-0.232994		-0.132171	-0.0904435	0.0225831	0.0905361
148	0.0529684	0.0687541	0.0607289	0.151033	0.318016	0.0207159	-0.22135	0.110304	0.05009	0.10773	-0.979601	0.402982	-0.235822		-0.131995	-0.0903345	0.0225288	0.0900381
149	0.0526	0.0694138	0.0606185	0.151645	0.318321	0.0205635	-0.22129	0.110439	0.0488776	0.107789	-0.980726	0.403737	-0.23864		-0.131816	-0.0902278	0.022476	0.0896033
150	0.0522293	0.0700788	0.0604939	0.152245	0.31862	0.020405	-0.221244	0.110586	0.0476738	0.107845	-0.981856	0.404494	-0.241448		-0.131632	-0.0901235	0.0224245	0.0892318
151	0.0518569	0.070749	0.0603551	0.152835	0.318914	0.0202405	-0.221212	0.110746	0.0464789	0.1079	-0.98299	0.405254	-0.244243		-0.131446	-0.0900219	0.0223743	0.0889235
152	0.0514829	0.0714243	0.0602021	0.153414	0.319203	0.0200702	-0.221192	0.110917	0.0452933	0.107953	-0.984128	0.406014	-0.247027		-0.131255	-0.0899233	0.0223252	0.0886784
153	0.0511078	0.0721048	0.060035	0.153981	0.319487	0.0198942	-0.221186	0.111101	0.0441171	0.108003	-0.985271	0.406777	-0.249798		-0.13106	-0.0898278	0.0222772	0.0884966
154	0.0507318	0.0727903	0.0598535	0.154536	0.319765	0.0197127	-0.221192	0.111296	0.0429507	0.108052	-0.986417	0.40754	-0.252555		-0.130861	-0.0897358	0.0222302	0.0883778
155	0.0503554	0.0734808	0.0596579	0.155081	0.320039	0.0195256	-0.221211	0.111505	0.0417944	0.1081	-0.987566	0.408304	-0.255299		-0.130658	-0.0896474	0.0221842	0.0883219
156	0.0499788	0.0741763	0.059448	0.155614	0.320309	0.0193332	-0.221243	0.111725	0.0406484	0.108146	-0.988718	0.409069	-0.258029		-0.130451	-0.0895629	0.022139	0.088329
157	0.0496024	0.0748767	0.0592239	0.156136	0.320573	0.0191355	-0.221288	0.111957	0.039513	0.10819	-0.989872	0.409833	-0.260743		-0.13024	-0.0894824	0.0220947	0.088399
158	0.0492266	0.0755819	0.0589856	0.156646	0.320834	0.0189327	-0.221345	0.112202	0.0383884	0.108233	-0.991029	0.410598	-0.263442		-0.130024	-0.0894063	0.0220512	0.0885316
159	0.0488516	0.0762918	0.0587332	0.157146	0.321089	0.018725	-0.221413	0.112459	0.0372749	0.108275	-0.992188	0.411363	-0.266125		-0.129804	-0.0893347	0.0220084	0.0887269
160	0.0484779	0.0770064	0.0584665	0.157634	0.321341	0.0185124	-0.221494	0.112728	0.0361728	0.108315	-0.993349	0.412127	-0.268792		-0.12958	-0.0892678	0.0219663	0.0889846
161	0.0481057	0.0777256	0.0581858	0.158111	0.321588	0.0182952	-0.221587	0.113009	0.0350823	0.108355	-0.99451	0.41289	-0.271441		-0.129351	-0.0892058	0.0219249	0.0893048
162	0.0477355	0.0784493	0.0578909	0.158577	0.321832	0.0180734	-0.22169	0.113302	0.0340037	0.108393	-0.995673	0.413652	-0.274073		-0.129118	-0.0891489	0.0218842	0.0896871
163	0.0473676	0.0791773	0.057582	0.159033	0.322071	0.0178472	-0.221805	0.113606	0.0329372	0.108429	-0.996836	0.414413	-0.276687		-0.12888	-0.0890974	0.021844	0.0901316
164	0.0470023	0.0799097	0.057259	0.159477	0.322307	0.0176168	-0.221931	0.113922	0.0318831	0.108465	-0.997999	0.415172	-0.279282		-0.128638	-0.0890513	0.0218044	0.0906381
165	0.04664	0.0806463	0.0569221	0.159912	0.322539	0.0173824	-0.222067	0.11425	0.0308415	0.1085	-0.999162	0.415929	-0.281858		-0.128392	-0.0890108	0.0217654	0.0912063
166	0.0462809	0.081387	0.0565714	0.160335	0.322767	0.017144	-0.222214	0.114589	0.0298128	0.108533	-1.00032	0.416684	-0.284414		-0.128142	-0.0889762	0.0217269	0.0918363
167	0.0459255	0.0821317	0.0562068	0.160749	0.322992	0.016902	-0.22237	0.114939	0.0287971	0.108565	-1.00148	0.417437	-0.28695		-0.127887	-0.0889474	0.0216889	0.0925278
168	0.045574	0.0828803	0.0558285	0.161152	0.323214	0.0166564	-0.222536	0.1153	0.0277947	0.108596	-1.00264	0.418188	-0.289465		-0.127628	-0.0889248	0.0216515	0.0932807
169	0.0452268	0.0836327	0.0554365	0.161546	0.323433	0.0164074	-0.222711	0.115671	0.0268057	0.108626	-1.0038	0.418935	-0.291959		-0.127365	-0.0889082	0.0216146	0.0940948
170	0.0448842	0.0843888	0.0550311	0.16193	0.323649	0.0161553	-0.222894	0.116053	0.0258305	0.108654	-1.00495	0.419679	-0.294431		-0.127098	-0.088898	0.0215781	0.0949699
171	0.0445464	0.0851485	0.0546122	0.162305	0.323862	0.0159002	-0.223086	0.116446	0.0248691	0.108682	-1.0061	0.42042	-0.296882		-0.126827	-0.0888942	0.0215423	0.0959059
172	0.0442137	0.0859118	0.05418	0.162671	0.324072	0.0156424	-0.223286	0.116848	0.0239218	0.108707	-1.00725	0.421158	-0.299309		-0.126552	-0.0888967	0.0215069	0.0969027
173	0.0438865	0.0866785	0.0537347	0.163027	0.324281	0.0153821	-0.223494	0.11726	0.0229887	0.108732	-1.00839	0.421891	-0.301714		-0.126274	-0.0889058	0.0214722	0.09796
174	0.0435649	0.0874485	0.0532763	0.163375	0.324487	0.0151196	-0.223709	0.117681	0.02207	0.108755	-1.00952	0.422621	-0.304096		-0.125991	-0.0889215	0.021438	0.0990779
175	0.0432492	0.0882217	0.052805	0.163715	0.32469	0.014855	-0.22393	0.118111	0.0211659	0.108776	-1.01065	0.423346	-0.306454		-0.125706	-0.0889438	0.0214044	0.100256
176	0.0429396	0.088998	0.052321	0.164046	0.324892	0.0145887	-0.224157	0.118549	0.0202766	0.108795	-1.01178	0.424067	-0.308787		-0.125417	-0.0889727	0.0213715	0.101494
177	0.0426364	0.0897774	0.0518244	0.16437	0.325093	0.014321	-0.224391	0.118996	0.019402	0.108813	-1.01289	0.424782	-0.311097		-0.125125	-0.0890083	0.0213393	0.102793
178	0.0423397	0.0905598	0.0513154	0.164685	0.325291	0.014052	-0.22463	0.119451	0.0185425	0.108829	-1.014	0.425493	-0.313381		-0.12483	-0.0890506	0.0213077	0.104152
179	0.0420497	0.091345	0.0507942	0.164994	0.325489	0.013782	-0.224873	0.119914	0.0176981	0.108844	-1.0151	0.426198	-0.315641		-0.124532	-0.0890994	0.021277	0.10557
180	0.0417665	0.0921329	0.0502608	0.165295	0.325685	0.0135114	-0.225122	0.120383	0.0168688	0.108856	-1.0162	0.426898	-0.317875		-0.124231	-0.089155	0.021247	0.107048
181	0.0414904	0.0929235	0.0497156	0.165589	0.32588	0.0132405	-0.225374	0.12086	0.0160549	0.108866	-1.01728	0.427592	-0.320084		-0.123928	-0.0892172	0.0212178	0.108585
182	0.0412214	0.0937166	0.0491586	0.165877	0.326074	0.0129695	-0.225629	0.121342	0.0152563	0.108874	-1.01835	0.42828	-0.322267		-0.123622	-0.0892859	0.0211895	0.110182
183	0.0409596	0.0945122	0.04859	0.166158	0.326268	0.0126987	-0.225888	0.121831	0.0144732	0.10888	-1.01941	0.428961	-0.324425		-0.123314	-0.0893612	0.0211622	0.111837
184	0.0407051	0.0953102	0.0480101	0.166432	0.326462	0.0124285	-0.226149	0.122325	0.0137056	0.108884	-1.02046	0.429636	-0.326556		-0.123004	-0.0894431	0.0211358	0.113551
185	0.0404579	0.0961103	0.047419	0.166701	0.326655	0.0121592	-0.226413	0.122824	0.0129535	0.108885	-1.02149	0.430305	-0.328663		-0.122692	-0.0895314	0.0211105	0.115323
186	0.0402181	0.0969126	0.0468168	0.166964	0.326848	0.011891	-0.226678	0.123327	0.012217	0.108884	-1.02252	0.430966	-0.330743		-0.122379	-0.0896261	0.0210862	0.117153
187	0.0399858	0.0977169	0.0462038	0.167222	0.327041	0.0116244	-0.226944	0.123835	0.0114961	0.10888	-1.02353	0.43162	-0.332797		-0.122063	-0.0897271	0.0210631	0.119039
188	0.0397608	0.0985231	0.0455802	0.167474	0.327235	0.0113597	-0.22721	0.124346	0.0107908	0.108874	-1.02452	0.432266	-0.334826		-0.121747	-0.0898345	0.0210413	0.120982
189	0.0395432	0.0993311	0.0449461	0.167721	0.327429	0.0110971	-0.227477	0.124861	0.0101012	0.108865	-1.0255	0.432905	-0.336829		-0.121429	-0.089948	0.0210207	0.122981
190	0.039333	0.100141	0.0443016	0.167963	0.327624	0.0108371	-0.227744	0.125379	0.0094271	0.108854	-1.02646	0.433536	-0.338807		-0.12111	-0.0900676	0.0210014	0.125034
191	0.0391301	0.100952	0.0436471	0.168201	0.32782	0.0105799	-0.22801	0.125898	0.00876865	0.10884	-1.0274	0.434159	-0.34076		-0.12079	-0.0901932	0.0209835	0.127142
192	0.0389343	0.101764	0.0429826	0.168434	0.328017	0.0103259	-0.228275	0.12642	0.00812578	0.108824	-1.02832	0.434774	-0.342687		-0.12047	-0.0903248	0.0209671	0.129303
193	0.0387457	0.102578	0.0423084	0.168663	0.328215	0.0100754	-0.228538	0.126943	0.00749846	0.108805	-1.02923	0.435379	-0.34459		-0.120148	-0.0904622	0.0209522	0.131517
194	0.038564	0.103393	0.0416246	0.168889	0.328415	0.00982879	-0.2288	0.127467	0.00688664	0.108783	-1.03011	0.435977	-0.346469		-0.119826	-0.0906052	0.0209388	0.133783
195	0.0383892	0.104209	0.0409315	0.169111	0.328616	0.00958628	-0.229059	0.127991	0.00629029	0.108758	-1.03098	0.436565	-0.348323		-0.119504	-0.0907538	0.0209271	0.136099
196	0.0382211	0.105026	0.0402291	0.169329	0.328819	0.00934824	-0.229314	0.128516	0.00570934	0.108731	-1.03182	0.437143	-0.350153		-0.119182	-0.0909078	0.020917	0.138466
197	0.0380595	0.105844	0.0395177	0.169544	0.329024	0.00911495	-0.229567	0.12904	0.00514371	0.108701	-1.03263	0.437713	-0.351959		-0.118859	-0.0910671	0.0209086	0.140881
198	0.0379043	0.106662	0.0387975	0.169756	0.32923	0.00888673	-0.229816	0.129563	0.00459334	0.108668	-1.03343	0.438273	-0.353742		-0.118536	-0.0912315	0.020902	0.143345
199	0.0377553	0.107481	0.0380687	0.169966	0.329439	0.00866387	-0.230061	0.130084	0.00405813	0.108633	-1.0342	0.438823	-0.355502		-0.118214	-0.0914009	0.0208972	0.145856
200	0.0376122	0.1083	0.0373315	0.170172	0.32965	0.00844663	-0.230301	0.130604	0.00353799	0.108594	-1.03494	0.439363	-0.35724		-0.117891	-0.091575	0.0208943	0.148412
201	0.0374749	0.109119	0.036586	0.170377	0.329863	0.00823529	-0.230536	0.131121	0.00303281	0.108554	-1.03565	0.439893	-0.358955		-0.117568	-0.0917538	0.0208933	0.151013
202	0.0373432	0.109939	0.0358324	0.170579	0.330079	0.00803011	-0.230766	0.131636	0.00254249	0.10851	-1.03634	0.440412	-0.360649		-0.117246	-0.0919369	0.0208941	0.153657
203	0.0372167	0.110758	0.035071	0.17078	0.330297	0.00783132	-0.230991	0.132148	0.00206691	0.108464	-1.037	0.440921	-0.362322		-0.116924	-0.0921243	0.0208969	0.156343
204	0.0370952	0.111578	0.0343019	0.170979	0.330517	0.00763916	-0.231209	0.132655	0.00160593	0.108416	-1.03762	0.44142	-0.363973		-0.116603	-0.0923158	0.0209017	0.15907
205	0.0369786	0.112397	0.0335253	0.171176	0.33074	0.00745383	-0.231422	0.133159	0.00115944	0.108365	-1.03822	0.441908	-0.365605		-0.116282	-0.092511	0.0209085	0.161836
206	0.0368664	0.113216	0.0327413	0.171372	0.330966	0.00727554	-0.231628	0.133659	0.00072729	0.108312	-1.03878	0.442385	-0.367216		-0.115962	-0.0927098	0.0209173	0.16464
207	0.0367584	0.114034	0.0319503	0.171567	0.331194	0.00710448	-0.231827	0.134153	0.000309339	0.108256	-1.03932	0.442851	-0.368808		-0.115642	-0.0929119	0.0209282	0.167479
208	0.0366544	0.114852	0.0311523	0.171761	0.331425	0.0069408	-0.232018	0.134643	-9.45613e-05	0.108198	-1.03981	0.443307	-0.370381		-0.115323	-0.0931172	0.0209411	0.170353
209	0.036554	0.115669	0.0303476	0.171955	0.331659	0.00678468	-0.232203	0.135127	-0.000484563	0.108137	-1.04028	0.443751	-0.371936		-0.115005	-0.0933252	0.0209561	0.173259
210	0.0364568	0.116485	0.0295363	0.172148	0.331894	0.00663625	-0.232379	0.135604	-0.000860821	0.108075	-1.0407	0.444184	-0.373472		-0.114687	-0.0935358	0.0209731	0.176197
211	0.0363627	0.1173	0.0287186	0.172341	0.332133	0.00649566	-0.232548	0.136076	-0.00122349	0.10801	-1.0411	0.444606	-0.374991		-0.114371	-0.0937488	0.0209923	0.179163
212	0.0362712	0.118114	0.0278947	0.172534	0.332374	0.00636301	-0.232708	0.136541	-0.00157274	0.107944	-1.04145	0.445017	-0.376492		-0.114055	-0.0939637	0.0210135	0.182157
213	0.036182	0.118926	0.0270647	0.172726	0.332617	0.00623842	-0.232861	0.136998	-0.00190873	0.107875	-1.04177	0.445416	-0.377977		-0.11374	-0.0941804	0.0210369	0.185177
214	0.0360949	0.119737	0.0262289	0.17292	0.332862	0.00612198	-0.233004	0.137449	-0.00223161	0.107805	-1.04204	0.445805	-0.379445		-0.113426	-0.0943985	0.0210623	0.18822
215	0.0360094	0.120546	0.0253874	0.173114	0.33311	0.00601375	-0.233139	0.137892	-0.00254154	0.107733	-1.04228	0.446183	-0.380897		-0.113113	-0.0946177	0.0210897	0.191284
216	0.0359251	0.121354	0.0245404	0.173308	0.333359	0.00591381	-0.233264	0.138326	-0.0028387	0.107659	-1.04248	0.446549	-0.382334		-0.112802	-0.0948377	0.0211192	0.194369
217	0.0358419	0.12216	0.0236881	0.173503	0.33361	0.0058222	-0.233381	0.138753	-0.00312323	0.107584	-1.04264	0.446905	-0.383756		-0.112491	-0.0950582	0.0211507	0.197471
218	0.0357592	0.122963	0.0228307	0.1737	0.333863	0.00573895	-0.233488	0.139171	-0.0033953	0.107507	-1.04276	0.44725	-0.385163		-0.112182	-0.0952789	0.0211841	0.200589
219	0.0356768	0.123765	0.0219684	0.173898	0.334118	0.00566408	-0.233585	0.13958	-0.00365506	0.107429	-1.04283	0.447584	-0.386556		-0.111875	-0.0954995	0.0212196	0.20372
220	0.0355943	0.124564	0.0211013	0.174097	0.334374	0.0055976	-0.233673	0.13998	-0.00390266	0.10735	-1.04287	0.447908	-0.387935		-0.111568	-0.0957197	0.0212569	0.206863
221	0.0355113	0.125361	0.0202298	0.174297	0.334631	0.00553949	-0.233751	0.140371	-0.00413827	0.107269	-1.04286	0.448221	-0.389301		-0.111263	-0.095939	0.0212961	0.210015
222	0.0354275	0.126155	0.0193539	0.1745	0.334889	0.00548975	-0.233819	0.140753	-0.00436204	0.107188	-1.04281	0.448524	-0.390654		-0.11096	-0.0961573	0.0213372	0.213174
223	0.0353426	0.126946	0.0184741	0.174704	0.335148	0.00544833	-0.233877	0.141125	-0.00457411	0.107106	-1.04272	0.448817	-0.391994		-0.110659	-0.0963742	0.02138	0.216338
224	0.0352562	0.127734	0.0175903	0.174911	0.335407	0.0054152	-0.233926	0.141487	-0.00477465	0.107024	-1.04258	0.4491	-0.393323		-0.110359	-0.0965894	0.0214245	0.219505
225	0.035168	0.128519	0.016703	0.175119	0.335666	0.00539031	-0.233963	0.141839	-0.00496379	0.106941	-1.0424	0.449373	-0.39464		-0.110061	-0.0968026	0.0214708	0.222672
226	0.0350777	0.1293	0.0158123	0.17533	0.335926	0.00537359	-0.233991	0.142181	-0.00514168	0.106857	-1.04218	0.449637	-0.395946		-0.109765	-0.0970134	0.0215186	0.225837
227	0.0349849	0.130078	0.0149185	0.175544	0.336185	0.00536497	-0.234008	0.142513	-0.00530848	0.106773	-1.04191	0.449892	-0.397241		-0.109471	-0.0972216	0.0215679	0.228998
228	0.0348894	0.130852	0.0140217	0.17576	0.336444	0.00536437	-0.234015	0.142835	-0.00546431	0.10669	-1.0416	0.450138	-0.398526		-0.109179	-0.0974268	0.0216187	0.232152
229	0.0347908	0.131622	0.0131223	0.175979	0.336702	0.00537169	-0.234012	0.143146	-0.00560933	0.106606	-1.04124	0.450374	-0.3998		-0.108889	-0.0976287	0.0216709	0.235298
230	0.0346889	0.132387	0.0122204	0.176201	0.336959	0.00538685	-0.233998	0.143447	-0.00574366	0.106523	-1.04084	0.450603	-0.401065		-0.108602	-0.0978272	0.0217244	0.238433
231	0.0345833	0.133149	0.0113163	0.176426	0.337214	0.00540973	-0.233974	0.143737	-0.00586744	0.10644	-1.04039	0.450823	-0.402319		-0.108318	-0.0980217	0.0217791	0.241555
232	0.0344738	0.133906	0.0104104	0.176654	0.337468	0.00544023	-0.23394	0.144017	-0.00598078	0.106357	-1.03991	0.451034	-0.403564		-0.108036	-0.0982122	0.0218348	0.244662
233	0.0343601	0.134658	0.00950273	0.176885	0.337719	0.00547823	-0.233895	0.144286	-0.00608382	0.106276	-1.03937	0.451238	-0.4048		-0.107756	-0.0983982	0.0218916	0.247752
234	0.0342419	0.135405	0.00859366	0.17712	0.337969	0.00552359	-0.233839	0.144544	-0.00617667	0.106195	-1.03879	0.451435	-0.406026		-0.10748	-0.0985796	0.0219493	0.250823
235	0.0341189	0.136147	0.00768344	0.177358	0.338216	0.00557618	-0.233774	0.144792	-0.00625943	0.106115	-1.03817	0.451624	-0.407243		-0.107206	-0.0987561	0.0220078	0.253872
236	0.033991	0.136884	0.00677233	0.1776	0.338459	0.00563587	-0.233698	0.14503	-0.00633221	0.106035	-1.03751	0.451806	-0.408451		-0.106936	-0.0989273	0.0220669	0.256898
237	0.0338578	0.137616	0.00586059	0.177846	0.3387	0.0057025	-0.233612	0.145256	-0.0063951	0.105957	-1.0368	0.451981	-0.40965		-0.106669	-0.0990932	0.0221267	0.259899
238	0.0337191	0.138342	0.00494851	0.178095	0.338937	0.00577592	-0.233515	0.145473	-0.0064482	0.105881	-1.03604	0.45215	-0.41084		-0.106405	-0.0992533	0.0221869	0.262873
239	0.0335747	0.139062	0.00403635	0.178348	0.339169	0.00585596	-0.233409	0.145679	-0.00649159	0.105805	-1.03524	0.452312	-0.412022		-0.106144	-0.0994075	0.0222475	0.265819
240	0.0334243	0.139776	0.00312439	0.178606	0.339398	0.00594247	-0.233292	0.145874	-0.00652536	0.105731	-1.0344	0.452469	-0.413194		-0.105888	-0.0995556	0.0223083	0.268734
241	0.0332678	0.140484	0.0022129	0.178868	0.339621	0.00603526	-0.233166	0.146059	-0.0065496	0.105658	-1.03352	0.45262	-0.414358		-0.105635	-0.0996972	0.0223693	0.271616
242	0.0331048	0.141186	0.00130215	0.179133	0.33984	0.00613416	-0.233029	0.146234	-0.00656437	0.105587	-1.0326	0.452766	-0.415513		-0.105386	-0.0998321	0.0224304	0.274465
243	0.0329352	0.141882	0.000392421	0.179404	0.340053	0.00623898	-0.232883	0.146399	-0.00656977	0.105518	-1.03163	0.452907	-0.416659		-0.105141	-0.0999601	0.0224913	0.277278
244	0.0327589	0.142571	-0.000516023	0.179678	0.340261	0.00634954	-0.232727	0.146554	-0.00656586	0.10545	-1.03062	0.453043	-0.417796		-0.1049	-0.100081	0.0225521	0.280053
245	0.0325755	0.143253	-0.00142291	0.179957	0.340462	0.00646564	-0.232562	0.146699	-0.00655272	0.105383	-1.02958	0.453175	-0.418925		-0.104664	-0.100194	0.0226126	0.282789
246	0.032385	0.143928	-0.00232797	0.18024	0.340657	0.00658709	-0.232387	0.146834	-0.00653042	0.105319	-1.02849	0.453303	-0.420044		-0.104432	-0.1003	0.0226728	0.285484
247	0.0321872	0.144595	-0.00323094	0.180528	0.340844	0.00671369	-0.232203	0.14696	-0.00649902	0.105256	-1.02736	0.453427	-0.421153		-0.104205	-0.100398	0.0227324	0.288136
248	0.0319819	0.145256	-0.00413155	0.18082	0.341025	0.00684524	-0.232011	0.147077	-0.0064586	0.105195	-1.0262	0.453547	-0.422253		-0.103982	-0.100487	0.0227915	0.290743
249	0.031769	0.145909	-0.00502954	0.181116	0.341198	0.00698151	-0.231809	0.147184	-0.0064092	0.105135	-1.025	0.453665	-0.423343		-0.103765	-0.100569	0.0228499	0.293305
250	0.0315484	0.146554	-0.00592464	0.181417	0.341363	0.00712231	-0.231599	0.147282	-0.00635089	0.105077	-1.02376	0.453779	-0.424422		-0.103552	-0.100641	0.0229076	0.295819
251	0.0313199	0.147192	-0.00681659	0.181722	0.341521	0.0072674	-0.23138	0.147372	-0.00628371	0.105021	-1.02248	0.453891	-0.42549		-0.103345	-0.100705	0.0229643	0.298283
252	0.0310833	0.147822	-0.00770513	0.18203	0.341669	0.00741655	-0.231153	0.147453	-0.00620771	0.104967	-1.02117	0.454	-0.426548		-0.103142	-0.100759	0.0230201	0.300696
253	0.0308387	0.148443	-0.00858999	0.182343	0.341809	0.00756953	-0.230918	0.147525	-0.00612292	0.104914	-1.01983	0.454108	-0.427593		-0.102946	-0.100805	0.0230748	0.303057
254	0.0305858	0.149056	-0.0094709	0.18266	0.34194	0.00772611	-0.230675	0.14759	-0.00602937	0.104862	-1.01845	0.454214	-0.428626		-0.102754	-0.100841	0.0231283	0.305364
255	0.0303245	0.149661	-0.0103476	0.18298	0.342061	0.00788602	-0.230424	0.147647	-0.00592709	0.104812	-1.01704	0.454319	-0.429646		-0.102569	-0.100867	0.0231805	0.307615
256	0.0300547	0.150257	-0.0112198	0.183304	0.342173	0.00804903	-0.230167	0.147696	-0.00581609	0.104764	-1.0156	0.454422	-0.430651		-0.102389	-0.100884	0.0232314	0.309808
257	0.0297763	0.150844	-0.0120873	0.183631	0.342274	0.0082149	-0.229902	0.147738	-0.0056964	0.104717	-1.01412	0.454525	-0.431643		-0.102215	-0.100891	0.0232808	0.311943
258	0.0294893	0.151423	-0.0129497	0.183962	0.342366	0.00838337	-0.22963	0.147772	-0.00556802	0.104671	-1.01262	0.454627	-0.432618		-0.102047	-0.100888	0.0233287	0.314018
259	0.0291935	0.151992	-0.0138069	0.184295	0.342447	0.0085542	-0.229352	0.1478	-0.00543095	0.104627	-1.01109	0.454729	-0.433578		-0.101885	-0.100875	0.0233749	0.316032
260	0.0288887	0.152552	-0.0146585	0.184631	0.342518	0.00872717	-0.229068	0.147822	-0.0052852	0.104584	-1.00954	0.454832	-0.43452		-0.101729	-0.100852	0.0234194	0.317983
261	0.028575	0.153103	-0.0155043	0.184969	0.342578	0.00890201	-0.228778	0.147837	-0.00513077	0.104542	-1.00795	0.454934	-0.435445		-0.101579	-0.100819	0.023462	0.31987
262	0.0282522	0.153644	-0.0163439	0.18531	0.342627	0.00907851	-0.228482	0.147847	-0.00496765	0.104501	-1.00635	0.455038	-0.43635		-0.101435	-0.100776	0.0235028	0.321692
263	0.0279203	0.154176	-0.0171773	0.185653	0.342665	0.00925643	-0.228181	0.147851	-0.00479583	0.104461	-1.00472	0.455142	-0.437235		-0.101298	-0.100723	0.0235415	0.323448
264	0.0275791	0.154698	-0.0180039	0.185997	0.342692	0.00943552	-0.227875	0.147849	-0.00461532	0.104423	-1.00306	0.455248	-0.4381		-0.101167	-0.100659	0.0235782	0.325137
265	0.0272285	0.155211	-0.0188237	0.186343	0.342707	0.00961558	-0.227564	0.147843	-0.00442609	0.104386	-1.00139	0.455355	-0.438942		-0.101043	-0.100586	0.0236127	0.326758
266	0.0268686	0.155714	-0.0196364	0.18669	0.342711	0.00979635	-0.227249	0.147832	-0.00422813	0.10435	-0.99969	0.455465	-0.439761		-0.100926	-0.100502	0.023645	0.32831
267	0.0264991	0.156207	-0.0204416	0.187037	0.342703	0.00997763	-0.22693	0.147816	-0.00402143	0.104314	-0.997976	0.455576	-0.440555		-0.100815	-0.100409	0.023675	0.329794
268	0.0261201	0.15669	-0.0212392	0.187386	0.342684	0.0101592	-0.226608	0.147797	-0.00380596	0.10428	-0.996243	0.455689	-0.441324		-0.10071	-0.100305	0.0237025	0.331207
269	0.0257315	0.157163	-0.0220288	0.187734	0.342653	0.0103408	-0.226282	0.147774	-0.00358172	0.104248	-0.994494	0.455806	-0.442067		-0.100613	-0.100192	0.0237276	0.332549
270	0.0253332	0.157626	-0.0228103	0.188083	0.34261	0.0105223	-0.225954	0.147747	-0.00334869	0.104216	-0.992729	0.455924	-0.442781		-0.100522	-0.100068	0.0237501	0.333821
271	0.0249251	0.15808	-0.0235834	0.188431	0.342555	0.0107034	-0.225623	0.147718	-0.00310685	0.104185	-0.99095	0.456046	-0.443466		-0.100438	-0.0999352	0.0237699	0.335021
272	0.0245072	0.158523	-0.0243478	0.188779	0.342488	0.0108839	-0.22529	0.147685	-0.00285621	0.104156	-0.989157	0.456172	-0.444121		-0.100361	-0.0997925	0.0237871	0.336149
273	0.0240795	0.158957	-0.0251034	0.189125	0.34241	0.0110637	-0.224955	0.14765	-0.00259676	0.104128	-0.987353	0.4563	-0.444743		-0.10029	-0.0996403	0.0238014	0.337205
274	0.0236419	0.15938	-0.0258499	0.18947	0.342319	0.0112424	-0.22462	0.147614	-0.0023285	0.104101	-0.985538	0.456432	-0.445333		-0.100226	-0.0994788	0.0238128	0.338188
275	0.0231945	0.159794	-0.0265871	0.189814	0.342217	0.0114201	-0.224283	0.147575	-0.00205144	0.104076	-0.983714	0.456568	-0.445888		-0.100169	-0.099308	0.0238213	0.339099
276	0.0227371	0.160198	-0.0273149	0.190155	0.342102	0.0115963	-0.223946	0.147535	-0.00176559	0.104052	-0.981881	0.456707	-0.446407		-0.100119	-0.0991283	0.0238267	0.339937
277	0.0222698	0.160592	-0.028033	0.190495	0.341976	0.0117711	-0.223609	0.147494	-0.00147097	0.10403	-0.980041	0.45685	-0.446888		-0.100075	-0.0989397	0.0238289	0.340702
278	0.0217925	0.160976	-0.0287412	0.190831	0.341838	0.0119442	-0.223273	0.147451	-0.00116759	0.10401	-0.978196	0.456998	-0.447332		-0.100038	-0.0987426	0.0238279	0.341395
279	0.0213054	0.161351	-0.0294395	0.191165	0.341687	0.0121154	-0.222937	0.147409	-0.00085548	0.103991	-0.976345	0.45715	-0.447735		-0.100007	-0.0985369	0.0238236	0.342015
280	0.0208084	0.161716	-0.0301276	0.191495	0.341525	0.0122845	-0.222603	0.147366	-0.000534647	0.103975	-0.974491	0.457306	-0.448097		-0.0999822	-0.0983231	0.0238158	0.342563
281	0.0203016	0.162071	-0.0308055	0.191822	0.34135	0.0124516	-0.22227	0.147323	-0.000205115	0.10396	-0.972634	0.457466	-0.448416		-0.0999639	-0.0981013	0.0238046	0.343039
282	0.019785	0.162417	-0.0314731	0.192145	0.341164	0.0126162	-0.22194	0.147281	0.00013309	0.103947	-0.970775	0.457631	-0.448691		-0.0999516	-0.0978717	0.0237897	0.343443
283	0.0192586	0.162754	-0.0321301	0.192463	0.340966	0.0127784	-0.221613	0.147239	0.000479939	0.103937	-0.968917	0.4578	-0.44892		-0.0999452	-0.0976347	0.0237711	0.343776
284	0.0187225	0.163082	-0.0327766	0.192777	0.340755	0.012938	-0.221288	0.147198	0.000835394	0.103929	-0.967058	0.457974	-0.449102		-0.0999446	-0.0973904	0.0237487	0.344038
285	0.0181768	0.163401	-0.0334125	0.193086	0.340533	0.0130949	-0.220967	0.147159	0.00119941	0.103924	-0.965202	0.458152	-0.449236		-0.0999495	-0.0971391	0.0237224	0.344229
286	0.0176215	0.163711	-0.0340378	0.193389	0.340298	0.0132489	-0.220651	0.14712	0.00157195	0.103921	-0.963348	0.458335	-0.44932		-0.0999598	-0.0968811	0.0236921	0.344351
287	0.0170568	0.164012	-0.0346523	0.193687	0.340052	0.0134	-0.220338	0.147084	0.00195294	0.103921	-0.961498	0.458522	-0.449352		-0.0999752	-0.0966168	0.0236577	0.344403
288	0.0164828	0.164304	-0.035256	0.193979	0.339794	0.0135479	-0.220031	0.14705	0.00234233	0.103924	-0.959653	0.458714	-0.449332		-0.0999957	-0.0963463	0.0236192	0.344387
289	0.0158996	0.164588	-0.035849	0.194265	0.339524	0.0136927	-0.219729	0.147018	0.00274005	0.10393	-0.957814	0.458911	-0.449258		-0.100021	-0.0960701	0.0235765	0.344304
290	0.0153073	0.164864	-0.0364313	0.194545	0.339243	0.0138342	-0.219433	0.146988	0.00314602	0.10394	-0.955982	0.459112	-0.449129		-0.100051	-0.0957884	0.0235294	0.344155
291	0.014706	0.165131	-0.0370029	0.194818	0.33895	0.0139724	-0.219143	0.146962	0.00356017	0.103953	-0.954157	0.459317	-0.448943		-0.100085	-0.0955016	0.023478	0.34394
292	0.014096	0.165391	-0.0375638	0.195084	0.338645	0.0141071	-0.21886	0.146938	0.0039824	0.10397	-0.952341	0.459527	-0.448698		-0.100123	-0.0952099	0.023422	0.343661
293	0.0134774	0.165643	-0.0381142	0.195342	0.338329	0.0142383	-0.218583	0.146918	0.00441262	0.103991	-0.950535	0.45974	-0.448395		-0.100165	-0.0949138	0.0233616	0.34332
294	0.0128505	0.165886	-0.038654	0.195594	0.338002	0.0143659	-0.218315	0.146902	0.00485073	0.104016	-0.94874	0.459958	-0.448031		-0.10021	-0.0946136	0.0232966	0.342918
295	0.0122153	0.166123	-0.0391834	0.195837	0.337663	0.0144899	-0.218054	0.146889	0.00529661	0.104046	-0.946956	0.46018	-0.447605		-0.100259	-0.0943096	0.0232269	0.342456
296	0.0115722	0.166352	-0.0397025	0.196073	0.337313	0.0146101	-0.217801	0.14688	0.00575014	0.10408	-0.945184	0.460406	-0.447116		-0.100311	-0.0940022	0.0231525	0.341936
297	0.0109214	0.166574	-0.0402114	0.1963	0.336952	0.0147265	-0.217558	0.146876	0.00621122	0.104119	-0.943427	0.460636	-0.446563		-0.100366	-0.0936918	0.0230733	0.34136
298	0.0102632	0.166789	-0.0407103	0.196519	0.33658	0.014839	-0.217323	0.146876	0.0066797	0.104163	-0.941683	0.460869	-0.445945		-0.100424	-0.0933787	0.0229893	0.34073
299	0.00959767	0.166997	-0.0411994	0.196729	0.336198	0.0149477	-0.217098	0.146881	0.00715546	0.104213	-0.939956	0.461106	-0.445261		-0.100483	-0.0930633	0.0229004	0.340047
300	0.00892524	0.167198	-0.0416788	0.196931	0.335805	0.0150525	-0.216882	0.146891	0.00763836	0.104268	-0.938244	0.461345	-0.444511		-0.100545	-0.0927459	0.0228067	0.339314
301	0.00824617	0.167393	-0.0421486	0.197124	0.335401	0.0151533	-0.216676	0.146906	0.00812828	0.104329	-0.93655	0.461588	-0.443693		-0.100609	-0.0924269	0.022708	0.338532
302	0.00756075	0.167581	-0.0426092	0.197308	0.334987	0.0152501	-0.216481	0.146927	0.00862506	0.104397	-0.934873	0.461833	-0.442806		-0.100674	-0.0921068	0.0226043	0.337704
303	0.00686929	0.167764	-0.0430608	0.197483	0.334563	0.015343	-0.216297	0.146953	0.00912856	0.10447	-0.933216	0.462081	-0.441852		-0.100741	-0.0917858	0.0224956	0.336832
304	0.00617211	0.16794	-0.0435035	0.197649	0.33413	0.0154319	-0.216123	0.146985	0.00963861	0.104551	-0.931579	0.462331	-0.440828		-0.100809	-0.0914644	0.0223819	0.335917
305	0.00546954	0.168111	-0.0439376	0.197806	0.333686	0.0155169	-0.215961	0.147023	0.0101551	0.104638	-0.929963	0.462584	-0.439735		-0.100878	-0.0911429	0.0222632	0.334962
306	0.00476193	0.168276	-0.0443635	0.197953	0.333233	0.0155979	-0.21581	0.147067	0.0106778	0.104732	-0.928368	0.462837	-0.438572		-0.100947	-0.0908218	0.0221395	0.333969
307	0.00404962	0.168436	-0.0447814	0.19809	0.332771	0.015675	-0.215672	0.147117	0.0112065	0.104834	-0.926796	0.463093	-0.437339		-0.101017	-0.0905013	0.0220107	0.33294
308	0.00333298	0.16859	-0.0451915	0.198218	0.3323	0.0157482	-0.215545	0.147174	0.0117412	0.104943	-0.925248	0.46335	-0.436037		-0.101088	-0.0901819	0.0218768	0.331878
309	0.00261236	0.168739	-0.0455943	0.198337	0.33182	0.0158175	-0.21543	0.147238	0.0122816	0.10506	-0.923723	0.463608	-0.434665		-0.101159	-0.0898639	0.021738	0.330785
310	0.00188812	0.168883	-0.0459899	0.198446	0.331331	0.015883	-0.215327	0.147308	0.0128276	0.105186	-0.922224	0.463866	-0.433224		-0.10123	-0.0895478	0.0215941	0.329662
311	0.00116063	0.169022	-0.0463787	0.198545	0.330834	0.0159447	-0.215238	0.147386	0.0133789	0.105319	-0.920751	0.464125	-0.431713		-0.101301	-0.0892339	0.0214453	0.328513
312	0.000430266	0.169157	-0.0467611	0.198634	0.330329	0.0160026	-0.215161	0.147471	0.0139355	0.105461	-0.919305	0.464385	-0.430135		-0.101372	-0.0889226	0.0212914	0.32734
313	-0.000302612	0.169287	-0.0471374	0.198714	0.329816	0.0160569	-0.215096	0.147563	0.0144971	0.105611	-0.917886	0.464644	-0.428488		-0.101442	-0.0886142	0.0211326	0.326143
314	-0.00103763	0.169412	-0.0475078	0.198784	0.329296	0.0161076	-0.215045	0.147662	0.0150635	0.10577	-0.916495	0.464903	-0.426774		-0.101513	-0.0883091	0.0209689	0.324927
315	-0.00177441	0.169533	-0.0478728	0.198845	0.328769	0.0161547	-0.215007	0.147769	0.0156346	0.105939	-0.915134	0.465162	-0.424994		-0.101582	-0.0880077	0.0208003	0.323693
316	-0.00251259	0.16965	-0.0482327	0.198896	0.328234	0.0161984	-0.214982	0.147884	0.0162102	0.106116	-0.913803	0.46542	-0.423148		-0.101652	-0.0877104	0.0206268	0.322443
317	-0.00325178	0.169762	-0.0485879	0.198938	0.327693	0.0162386	-0.21497	0.148007	0.0167901	0.106303	-0.912503	0.465677	-0.421237		-0.101721	-0.0874174	0.0204485	0.32118
318	-0.00399161	0.169871	-0.0489386	0.19897	0.327146	0.0162755	-0.214971	0.148137	0.0173742	0.106499	-0.911234	0.465933	-0.419263		-0.101789	-0.0871292	0.0202654	0.319905
319	-0.00473172	0.169975	-0.0492854	0.198993	0.326592	0.0163092	-0.214986	0.148275	0.0179622	0.106704	-0.909997	0.466188	-0.417226		-0.101857	-0.086846	0.0200776	0.318621
320	-0.00547172	0.170076	-0.0496285	0.199007	0.326033	0.0163397	-0.215013	0.148421	0.0185539	0.10692	-0.908794	0.466441	-0.415128		-0.101924	-0.0865683	0.0198851	0.317331
321	-0.00621124	0.170173	-0.0499684	0.199011	0.325469	0.0163672	-0.215054	0.148575	0.0191493	0.107145	-0.907624	0.466693	-0.412969		-0.10199	-0.0862963	0.0196881	0.316036
322	-0.00694992	0.170266	-0.0503055	0.199006	0.324899	0.0163916	-0.215108	0.148737	0.019748	0.10738	-0.906489	0.466942	-0.410751		-0.102055	-0.0860304	0.0194865	0.314738
323	-0.00768739	0.170356	-0.0506401	0.198992	0.324325	0.0164131	-0.215175	0.148907	0.02035	0.107625	-0.905389	0.46719	-0.408476		-0.10212	-0.0857708	0.0192805	0.31344
324	-0.00842328	0.170442	-0.0509727	0.19897	0.323746	0.0164318	-0.215255	0.149085	0.0209549	0.10788	-0.904324	0.467435	-0.406145		-0.102184	-0.0855179	0.0190701	0.312144
325	-0.00915723	0.170525	-0.0513037	0.198938	0.323164	0.0164477	-0.215348	0.149272	0.0215628	0.108145	-0.903296	0.467677	-0.403759		-0.102247	-0.0852719	0.0188555	0.310851
326	-0.00988889	0.170604	-0.0516334	0.198898	0.322577	0.0164609	-0.215454	0.149466	0.0221732	0.108421	-0.902305	0.467917	-0.401319		-0.102309	-0.0850332	0.0186367	0.309564
327	-0.0106179	0.17068	-0.0519624	0.198849	0.321988	0.0164715	-0.215572	0.149668	0.0227862	0.108706	-0.901352	0.468154	-0.398829		-0.102371	-0.0848019	0.0184139	0.308284
328	-0.0113439	0.170753	-0.0522909	0.198791	0.321395	0.0164795	-0.215702	0.149877	0.0234014	0.109002	-0.900436	0.468388	-0.396288		-0.102431	-0.0845783	0.0181871	0.307014
329	-0.0120665	0.170822	-0.0526195	0.198726	0.3208	0.0164851	-0.215845	0.150095	0.0240188	0.109308	-0.89956	0.468619	-0.393699		-0.102491	-0.0843625	0.0179565	0.305755
330	-0.0127855	0.170888	-0.0529485	0.198652	0.320203	0.0164884	-0.215999	0.150321	0.0246381	0.109624	-0.898722	0.468847	-0.391064		-0.10255	-0.0841549	0.0177221	0.304509
331	-0.0135004	0.170952	-0.0532784	0.198571	0.319605	0.0164893	-0.216166	0.150554	0.0252591	0.109951	-0.897925	0.469071	-0.388384		-0.102608	-0.0839555	0.0174841	0.303278
332	-0.014211	0.171012	-0.0536095	0.198482	0.319004	0.016488	-0.216343	0.150794	0.0258816	0.110287	-0.897168	0.469291	-0.385661		-0.102666	-0.0837646	0.0172427	0.302064
333	-0.0149168	0.171069	-0.0539422	0.198385	0.318403	0.0164845	-0.216532	0.151043	0.0265055	0.110634	-0.896451	0.469508	-0.382896		-0.102722	-0.0835823	0.0169979	0.300868
334	-0.0156176	0.171123	-0.0542769	0.198281	0.317802	0.016479	-0.216732	0.151298	0.0271306	0.11099	-0.895776	0.469721	-0.380093		-0.102778	-0.0834086	0.01675	0.299691
335	-0.0163131	0.171174	-0.054614	0.19817	0.3172	0.0164715	-0.216943	0.151561	0.0277568	0.111357	-0.895143	0.46993	-0.377252		-0.102833	-0.0832439	0.0164989	0.298536
336	-0.017003	0.171222	-0.054954	0.198052	0.316598	0.016462	-0.217163	0.15183	0.0283837	0.111733	-0.894552	0.470135	-0.374375		-0.102887	-0.0830881	0.016245	0.297403
337	-0.017687	0.171267	-0.055297	0.197927	0.315997	0.0164507	-0.217394	0.152107	0.0290114	0.112118	-0.894003	0.470335	-0.371464		-0.10294	-0.0829413	0.0159883	0.296293
338	-0.0183647	0.171309	-0.0556436	0.197796	0.315397	0.0164376	-0.217634	0.15239	0.0296395	0.112514	-0.893497	0.470532	-0.368522		-0.102993	-0.0828037	0.015729	0.295209
339	-0.019036	0.171349	-0.0559941	0.197659	0.314798	0.0164228	-0.217884	0.152679	0.030268	0.112918	-0.893034	0.470723	-0.365549		-0.103044	-0.0826752	0.0154672	0.294151
340	-0.0197005	0.171386	-0.0563487	0.197516	0.314202	0.0164064	-0.218142	0.152975	0.0308967	0.113332	-0.892614	0.47091	-0.362548		-0.103095	-0.0825559	0.0152033	0.29312
341	-0.0203581	0.17142	-0.056708	0.197367	0.313607	0.0163884	-0.218409	0.153277	0.0315255	0.113755	-0.892238	0.471092	-0.359521		-0.103145	-0.0824459	0.0149373	0.292117
342	-0.0210084	0.171451	-0.0570723	0.197212	0.313016	0.016369	-0.218684	0.153585	0.0321541	0.114186	-0.891906	0.47127	-0.35647		-0.103195	-0.0823451	0.0146694	0.291143
343	-0.0216512	0.17148	-0.0574418	0.197052	0.312427	0.0163483	-0.218966	0.153898	0.0327826	0.114626	-0.891617	0.471442	-0.353396		-0.103243	-0.0822536	0.0143999	0.290198
344	-0.0222864	0.171506	-0.0578169	0.196887	0.311842	0.0163263	-0.219256	0.154217	0.0334106	0.115074	-0.891372	0.471608	-0.350301		-0.103291	-0.0821712	0.0141288	0.289284
345	-0.0229138	0.171529	-0.0581979	0.196717	0.311262	0.0163031	-0.219552	0.15454	0.0340382	0.115531	-0.891171	0.471769	-0.347188		-0.103338	-0.0820981	0.0138565	0.288401
346	-0.0235331	0.171551	-0.0585853	0.196542	0.310685	0.016279	-0.219855	0.154868	0.0346651	0.115995	-0.891013	0.471925	-0.344058		-0.103384	-0.0820341	0.0135831	0.287549
347	-0.0241442	0.17157	-0.0589791	0.196363	0.310114	0.0162539	-0.220164	0.155201	0.0352913	0.116467	-0.890899	0.472074	-0.340913		-0.103429	-0.0819791	0.0133088	0.28673
348	-0.0247469	0.171587	-0.0593799	0.196179	0.309548	0.016228	-0.220478	0.155537	0.0359166	0.116946	-0.890828	0.472217	-0.337755		-0.103474	-0.0819332	0.0130339	0.285943
349	-0.0253411	0.171602	-0.0597878	0.195991	0.308988	0.0162015	-0.220796	0.155877	0.0365411	0.117432	-0.890799	0.472354	-0.334584		-0.103517	-0.0818963	0.0127585	0.285188
350	-0.0259267	0.171615	-0.0602032	0.1958	0.308435	0.0161744	-0.22112	0.156221	0.0371645	0.117925	-0.890813	0.472484	-0.331404		-0.10356	-0.0818682	0.0124828	0.284467
351	-0.0265037	0.171627	-0.0606263	0.195605	0.307888	0.016147	-0.221447	0.156567	0.0377868	0.118424	-0.890869	0.472608	-0.328216		-0.103601	-0.0818489	0.0122071	0.283779
352	-0.0270718	0.171638	-0.0610576	0.195406	0.307349	0.0161194	-0.221777	0.156916	0.0384079	0.118929	-0.890966	0.472724	-0.325021		-0.103642	-0.0818383	0.0119315	0.283124
353	-0.0276312	0.171647	-0.0614971	0.195204	0.306817	0.0160916	-0.222111	0.157268	0.0390278	0.119439	-0.891104	0.472833	-0.32182		-0.103681	-0.0818362	0.0116563	0.282504
354	-0.0281817	0.171655	-0.0619454	0.194999	0.306293	0.016064	-0.222447	0.157621	0.0396463	0.119956	-0.891282	0.472934	-0.318615		-0.103719	-0.0818425	0.0113816	0.281917
355	-0.0287234	0.171662	-0.0624025	0.194791	0.305778	0.0160366	-0.222785	0.157975	0.0402635	0.120477	-0.891499	0.473028	-0.315407		-0.103756	-0.0818572	0.0111078	0.281364
356	-0.0292562	0.171669	-0.0628689	0.194581	0.305272	0.0160096	-0.223125	0.15833	0.0408792	0.121002	-0.891754	0.473113	-0.312198		-0.103792	-0.0818799	0.0108349	0.280845
357	-0.0297802	0.171675	-0.0633447	0.194368	0.304775	0.0159832	-0.223465	0.158686	0.0414935	0.121532	-0.892046	0.47319	-0.308988		-0.103826	-0.0819107	0.0105633	0.28036
358	-0.0302954	0.171681	-0.0638303	0.194153	0.304289	0.0159575	-0.223806	0.159042	0.0421061	0.122066	-0.892376	0.473258	-0.305779		-0.103859	-0.0819493	0.010293	0.27991
359	-0.0308019	0.171686	-0.0643259	0.193936	0.303812	0.0159328	-0.224148	0.159398	0.0427172	0.122604	-0.89274	0.473318	-0.302573		-0.10389	-0.0819955	0.0100243	0.279495
360	-0.0312997	0.171692	-0.0648318	0.193717	0.303346	0.0159091	-0.224489	0.159753	0.0433265	0.123144	-0.893139	0.473368	-0.299369		-0.10392	-0.0820492	0.00975736	0.279114
361	-0.031789	0.171698	-0.0653483	0.193497	0.302891	0.0158867	-0.224829	0.160106	0.0439341	0.123687	-0.893572	0.473409	-0.296168		-0.103948	-0.0821101	0.00949237	0.278768
362	-0.0322698	0.171704	-0.0658755	0.193276	0.302448	0.0158657	-0.225167	0.160458	0.0445399	0.124233	-0.894037	0.47344	-0.292973		-0.103974	-0.0821782	0.00922951	0.278457
363	-0.0327423	0.171711	-0.0664138	0.193053	0.302016	0.0158463	-0.225504	0.160808	0.0451439	0.12478	-0.894534	0.473461	-0.289783		-0.103998	-0.0822531	0.00896894	0.27818
364	-0.0332067	0.171719	-0.0669633	0.192829	0.301597	0.0158285	-0.225839	0.161155	0.0457459	0.125329	-0.89506	0.473472	-0.286599		-0.104019	-0.0823346	0.00871083	0.277939
365	-0.033663	0.171728	-0.0675243	0.192605	0.30119	0.0158127	-0.226171	0.161499	0.0463459	0.12588	-0.895616	0.473473	-0.283423		-0.104039	-0.0824224	0.00845532	0.277733
366	-0.0341116	0.171738	-0.0680971	0.19238	0.300796	0.0157988	-0.2265	0.161839	0.0469438	0.126431	-0.896199	0.473463	-0.280254		-0.104056	-0.0825164	0.00820258	0.277562
367	-0.0345525	0.17175	-0.0686817	0.192154	0.300414	0.0157871	-0.226826	0.162175	0.0475396	0.126982	-0.896808	0.473442	-0.277094		-0.104071	-0.0826162	0.00795275	0.277425
368	-0.0349861	0.171763	-0.0692784	0.191929	0.300046	0.0157777	-0.227147	0.162507	0.0481332	0.127533	-0.897443	0.473411	-0.273944		-0.104083	-0.0827215	0.00770597	0.277323
369	-0.0354124	0.171778	-0.0698874	0.191704	0.299692	0.0157707	-0.227464	0.162834	0.0487245	0.128085	-0.898101	0.473368	-0.270803		-0.104092	-0.0828321	0.00746238	0.277255
370	-0.0358319	0.171795	-0.0705089	0.191479	0.299351	0.0157663	-0.227777	0.163154	0.0493135	0.128635	-0.898783	0.473314	-0.267673		-0.104098	-0.0829476	0.0072221	0.27722
371	-0.0362447	0.171815	-0.071143	0.191255	0.299025	0.0157646	-0.228084	0.163469	0.0498999	0.129184	-0.899485	0.473248	-0.264554		-0.1041	-0.0830678	0.00698525	0.277218
372	-0.0366511	0.171837	-0.07179	0.191031	0.298713	0.0157656	-0.228386	0.163778	0.0504838	0.129732	-0.900208	0.473171	-0.261447		-0.1041	-0.0831922	0.00675197	0.277248
373	-0.0370514	0.171861	-0.07245	0.190809	0.298415	0.0157697	-0.228681	0.164079	0.0510651	0.130278	-0.90095	0.473083	-0.258352		-0.104096	-0.0833205	0.00652235	0.27731
374	-0.037446	0.171889	-0.0731232	0.190588	0.298131	0.0157767	-0.228971	0.164373	0.0516437	0.130822	-0.901709	0.472982	-0.25527		-0.104088	-0.0834523	0.00629651	0.277404
375	-0.037835	0.171919	-0.0738097	0.190368	0.297863	0.015787	-0.229254	0.164658	0.0522194	0.131364	-0.902484	0.47287	-0.252202		-0.104076	-0.0835874	0.00607454	0.277528
376	-0.038219	0.171953	-0.0745098	0.19015	0.297609	0.0158004	-0.229529	0.164936	0.0527921	0.131903	-0.903274	0.472745	-0.249148		-0.104061	-0.0837253	0.00585655	0.277682
377	-0.038598	0.171991	-0.0752234	0.189935	0.29737	0.0158173	-0.229798	0.165204	0.0533618	0.132438	-0.904078	0.472609	-0.246109		-0.104041	-0.0838656	0.00564261	0.277864
378	-0.0389727	0.172032	-0.0759509	0.189721	0.297146	0.0158377	-0.230059	0.165463	0.0539283	0.13297	-0.904894	0.472461	-0.243085		-0.104017	-0.084008	0.00543283	0.278075
379	-0.0393432	0.172077	-0.0766922	0.18951	0.296937	0.0158616	-0.230312	0.165713	0.0544916	0.133499	-0.905721	0.472301	-0.240077		-0.103989	-0.0841521	0.00522728	0.278313
380	-0.0397099	0.172125	-0.0774477	0.189302	0.296743	0.0158892	-0.230557	0.165952	0.0550514	0.134023	-0.906558	0.472129	-0.237086		-0.103956	-0.0842974	0.00502604	0.278576
381	-0.0400732	0.172179	-0.0782172	0.189096	0.296564	0.0159205	-0.230794	0.16618	0.0556077	0.134544	-0.907404	0.471944	-0.234112		-0.103919	-0.0844436	0.00482919	0.278865
382	-0.0404336	0.172236	-0.079001	0.188894	0.2964	0.0159558	-0.231021	0.166398	0.0561603	0.135059	-0.908257	0.471748	-0.231156		-0.103877	-0.0845903	0.00463681	0.279178
383	-0.0407912	0.172298	-0.0797992	0.188696	0.296251	0.0159949	-0.23124	0.166604	0.0567091	0.13557	-0.909115	0.47154	-0.228219		-0.10383	-0.0847372	0.00444897	0.279513
384	-0.0411466	0.172365	-0.0806118	0.188501	0.296117	0.0160381	-0.23145	0.166798	0.0572539	0.136076	-0.909979	0.47132	-0.225301		-0.103778	-0.0848837	0.00426572	0.279869
385	-0.0415001	0.172436	-0.0814388	0.18831	0.295998	0.0160853	-0.23165	0.16698	0.0577947	0.136576	-0.910846	0.471088	-0.222403		-0.103721	-0.0850295	0.00408714	0.280246
386	-0.0418521	0.172513	-0.0822804	0.188123	0.295894	0.0161366	-0.23184	0.16715	0.0583312	0.137071	-0.911715	0.470845	-0.219526		-0.103658	-0.0851742	0.00391326	0.280641
387	-0.0422029	0.172595	-0.0831365	0.187941	0.295804	0.0161921	-0.232021	0.167306	0.0588634	0.13756	-0.912585	0.470589	-0.21667		-0.103591	-0.0853174	0.00374416	0.281054
388	-0.0425529	0.172682	-0.0840071	0.187763	0.295729	0.0162517	-0.232191	0.16745	0.0593911	0.138043	-0.913456	0.470323	-0.213837		-0.103518	-0.0854587	0.00357986	0.281482
389	-0.0429026	0.172774	-0.0848923	0.18759	0.295667	0.0163157	-0.232351	0.16758	0.0599141	0.13852	-0.914325	0.470045	-0.211027		-0.10344	-0.0855978	0.00342043	0.281926
390	-0.0432522	0.172872	-0.085792	0.187423	0.29562	0.0163838	-0.232501	0.167696	0.0604323	0.13899	-0.915192	0.469756	-0.20824		-0.103356	-0.0857342	0.0032659	0.282383
391	-0.0436023	0.172975	-0.0867062	0.18726	0.295587	0.0164563	-0.23264	0.167797	0.0609456	0.139454	-0.916055	0.469457	-0.205479		-0.103267	-0.0858676	0.00311631	0.282853
392	-0.0439531	0.173084	-0.0876349	0.187104	0.295567	0.016533	-0.232769	0.167885	0.0614538	0.139911	-0.916915	0.469146	-0.202743		-0.103173	-0.0859976	0.0029717	0.283333
393	-0.044305	0.173199	-0.0885778	0.186953	0.29556	0.0166141	-0.232887	0.167957	0.0619569	0.140361	-0.917769	0.468825	-0.200033		-0.103073	-0.0861239	0.00283211	0.283823
394	-0.0446584	0.17332	-0.089535	0.186808	0.295566	0.0166994	-0.232993	0.168015	0.0624547	0.140805	-0.918617	0.468494	-0.19735		-0.102967	-0.0862461	0.00269758	0.284321
395	-0.0450136	0.173446	-0.0905064	0.18667	0.295585	0.016789	-0.233089	0.168058	0.0629471	0.141241	-0.919458	0.468152	-0.194695		-0.102856	-0.0863637	0.00256813	0.284825
396	-0.0453712	0.173578	-0.0914918	0.186538	0.295616	0.0168829	-0.233174	0.168086	0.063434	0.14167	-0.92029	0.467801	-0.192069		-0.102739	-0.0864766	0.00244381	0.285335
397	-0.0457313	0.173717	-0.0924911	0.186414	0.295659	0.016981	-0.233247	0.168097	0.0639153	0.142091	-0.921114	0.467441	-0.189473		-0.102617	-0.0865844	0.00232465	0.28585
398	-0.0460943	0.173861	-0.0935042	0.186296	0.295713	0.0170833	-0.233309	0.168094	0.064391	0.142505	-0.921929	0.467071	-0.186907		-0.10249	-0.0866866	0.00221068	0.286367
399	-0.0464606	0.174012	-0.0945309	0.186185	0.295779	0.0171897	-0.233359	0.168074	0.0648608	0.142912	-0.922733	0.466693	-0.184372		-0.102357	-0.0867831	0.00210193	0.286885
400	-0.0468306	0.174168	-0.095571	0.186083	0.295855	0.0173002	-0.233399	0.168038	0.0653249	0.14331	-0.923526	0.466305	-0.18187		-0.102218	-0.0868735	0.00199845	0.287404
401	-0.0472045	0.174331	-0.0966245	0.185987	0.295942	0.0174147	-0.233426	0.167987	0.065783	0.143701	-0.924307	0.46591	-0.179401		-0.102075	-0.0869574	0.00190026	0.287921
402	-0.0475827	0.174499	-0.0976911	0.1859	0.296038	0.0175331	-0.233442	0.167919	0.0662353	0.144084	-0.925075	0.465506	-0.176966		-0.101926	-0.0870347	0.0018074	0.288436
403	-0.0479654	0.174674	-0.0987705	0.185821	0.296144	0.0176554	-0.233447	0.167835	0.0666816	0.14446	-0.925831	0.465095	-0.174567		-0.101772	-0.087105	0.0017199	0.288947
404	-0.0483531	0.174855	-0.0998628	0.18575	0.296258	0.0177815	-0.23344	0.167734	0.067122	0.144827	-0.926573	0.464677	-0.172205		-0.101613	-0.087168	0.0016378	0.289452
405	-0.0487459	0.175042	-0.100967	0.185687	0.296381	0.0179112	-0.233422	0.167617	0.0675563	0.145186	-0.927301	0.464251	-0.169879		-0.101449	-0.0872236	0.00156113	0.289951
406	-0.0491442	0.175234	-0.102084	0.185633	0.296512	0.0180444	-0.233392	0.167484	0.0679848	0.145538	-0.928014	0.463819	-0.167592		-0.10128	-0.0872713	0.00148993	0.290442
407	-0.0495482	0.175433	-0.103214	0.185588	0.29665	0.018181	-0.23335	0.167335	0.0684073	0.145881	-0.928712	0.463381	-0.165344		-0.101107	-0.0873111	0.0014242	0.290923
408	-0.0499583	0.175638	-0.104354	0.185551	0.296795	0.0183208	-0.233298	0.167169	0.0688239	0.146217	-0.929394	0.462937	-0.163136		-0.100929	-0.0873426	0.00136399	0.291395
409	-0.0503746	0.175848	-0.105507	0.185524	0.296946	0.0184638	-0.233234	0.166986	0.0692347	0.146544	-0.93006	0.462487	-0.160969		-0.100746	-0.0873656	0.00130931	0.291854
410	-0.0507974	0.176065	-0.106671	0.185505	0.297103	0.0186098	-0.233159	0.166788	0.0696397	0.146864	-0.930709	0.462032	-0.158843		-0.100559	-0.0873799	0.00126018	0.292301
411	-0.0512269	0.176287	-0.107845	0.185496	0.297266	0.0187585	-0.233073	0.166573	0.070039	0.147175	-0.931341	0.461572	-0.156761		-0.100369	-0.0873853	0.00121662	0.292735
412	-0.0516633	0.176514	-0.109031	0.185495	0.297433	0.01891	-0.232976	0.166342	0.0704326	0.147479	-0.931957	0.461107	-0.154721		-0.100174	-0.0873816	0.00117864	0.293154
413	-0.052107	0.176747	-0.110227	0.185504	0.297604	0.0190639	-0.232868	0.166095	0.0708207	0.147775	-0.932555	0.460639	-0.152725		-0.0999753	-0.0873686	0.00114625	0.293557
414	-0.052558	0.176986	-0.111433	0.185522	0.297779	0.0192201	-0.23275	0.165832	0.0712034	0.148062	-0.933135	0.460166	-0.150774		-0.0997731	-0.0873461	0.00111946	0.293945
415	-0.0530165	0.17723	-0.112649	0.18555	0.297957	0.0193784	-0.232621	0.165554	0.0715807	0.148342	-0.933697	0.45969	-0.148869		-0.0995675	-0.0873139	0.00109826	0.294315
416	-0.0534828	0.177479	-0.113874	0.185586	0.298138	0.0195386	-0.232482	0.16526	0.0719527	0.148614	-0.934241	0.459211	-0.147008		-0.0993586	-0.087272	0.00108267	0.294667
417	-0.053957	0.177733	-0.115109	0.185632	0.29832	0.0197006	-0.232332	0.164951	0.0723196	0.148878	-0.934766	0.458729	-0.145195		-0.0991466	-0.0872201	0.00107267	0.295002
418	-0.0544392	0.177991	-0.116352	0.185686	0.298505	0.019864	-0.232173	0.164626	0.0726816	0.149134	-0.935273	0.458244	-0.143427		-0.0989317	-0.0871582	0.00106824	0.295317
419	-0.0549296	0.178255	-0.117604	0.18575	0.29869	0.0200287	-0.232004	0.164287	0.0730386	0.149383	-0.935762	0.457758	-0.141707		-0.0987141	-0.087086	0.00106938	0.295613
420	-0.0554284	0.178523	-0.118863	0.185823	0.298876	0.0201944	-0.231825	0.163932	0.0733909	0.149624	-0.936232	0.45727	-0.140035		-0.0984939	-0.0870036	0.00107604	0.295889
421	-0.0559357	0.178795	-0.120131	0.185904	0.299062	0.020361	-0.231637	0.163564	0.0737386	0.149857	-0.936683	0.45678	-0.13841		-0.0982714	-0.0869108	0.00108821	0.296144
422	-0.0564516	0.179072	-0.121405	0.185994	0.299248	0.0205281	-0.23144	0.163181	0.0740817	0.150082	-0.937115	0.456289	-0.136832		-0.0980467	-0.0868076	0.00110584	0.296379
423	-0.0569761	0.179352	-0.122687	0.186093	0.299432	0.0206956	-0.231234	0.162784	0.0744205	0.1503	-0.937528	0.455798	-0.135303		-0.09782	-0.0866939	0.0011289	0.296592
424	-0.0575095	0.179637	-0.123975	0.186201	0.299616	0.0208633	-0.231019	0.162373	0.0747551	0.150511	-0.937922	0.455306	-0.133822		-0.0975915	-0.0865695	0.00115734	0.296784
425	-0.0580518	0.179925	-0.125269	0.186317	0.299797	0.0210308	-0.230795	0.161949	0.0750856	0.150714	-0.938298	0.454815	-0.132388		-0.0973613	-0.0864346	0.0011911	0.296955
426	-0.0586031	0.180216	-0.126568	0.18644	0.299976	0.021198	-0.230564	0.161512	0.0754122	0.15091	-0.938654	0.454323	-0.131003		-0.0971297	-0.086289	0.00123013	0.297103
427	-0.0591634	0.18051	-0.127873	0.186572	0.300153	0.0213647	-0.230325	0.161063	0.0757351	0.151099	-0.938992	0.453833	-0.129665		-0.0968968	-0.0861328	0.00127436	0.297229
428	-0.0597329	0.180808	-0.129182	0.186712	0.300326	0.0215305	-0.230078	0.1606	0.0760544	0.15128	-0.939311	0.453343	-0.128374		-0.0966629	-0.0859659	0.00132372	0.297332
429	-0.0603116	0.181108	-0.130496	0.186859	0.300496	0.0216954	-0.229824	0.160126	0.0763704	0.151455	-0.939612	0.452855	-0.12713		-0.096428	-0.0857884	0.00137814	0.297413
430	-0.0608994	0.181411	-0.131814	0.187014	0.300662	0.0218589	-0.229562	0.15964	0.0766831	0.151622	-0.939894	0.452369	-0.125933		-0.0961924	-0.0856003	0.00143754	0.297471
431	-0.0614966	0.181716	-0.133135	0.187175	0.300823	0.022021	-0.229294	0.159143	0.0769928	0.151783	-0.940158	0.451885	-0.124782		-0.0959562	-0.0854017	0.00150183	0.297507
432	-0.062103	0.182024	-0.13446	0.187344	0.300979	0.0221814	-0.22902	0.158634	0.0772998	0.151937	-0.940405	0.451403	-0.123675		-0.0957196	-0.0851926	0.00157092	0.29752
433	-0.0627188	0.182333	-0.135787	0.187519	0.30113	0.0223399	-0.228739	0.158115	0.0776041	0.152084	-0.940633	0.450924	-0.122614		-0.0954826	-0.0849731	0.00164472	0.29751
434	-0.0633439	0.182644	-0.137116	0.1877	0.301276	0.0224962	-0.228452	0.157586	0.0779061	0.152225	-0.940844	0.450448	-0.121596		-0.0952455	-0.0847433	0.00172311	0.297479
435	-0.0639784	0.182957	-0.138447	0.187887	0.301415	0.0226501	-0.22816	0.157046	0.0782059	0.152359	-0.941038	0.449976	-0.120621		-0.0950084	-0.0845032	0.00180599	0.297425
436	-0.0646222	0.183271	-0.139779	0.188079	0.301548	0.0228014	-0.227862	0.156497	0.0785038	0.152487	-0.941215	0.449507	-0.119688		-0.0947712	-0.0842531	0.00189325	0.29735
437	-0.0652753	0.183586	-0.141112	0.188278	0.301675	0.02295	-0.22756	0.155939	0.0787999	0.152609	-0.941376	0.449042	-0.118795		-0.0945342	-0.083993	0.00198475	0.297253
438	-0.0659378	0.183903	-0.142446	0.188481	0.301795	0.0230955	-0.227252	0.155372	0.0790946	0.152724	-0.941521	0.448582	-0.117942		-0.0942974	-0.083723	0.00208036	0.297136
439	-0.0666096	0.18422	-0.14378	0.188688	0.301907	0.0232378	-0.226941	0.154797	0.079388	0.152834	-0.941649	0.448126	-0.117127		-0.0940609	-0.0834434	0.00217995	0.296999
440	-0.0672907	0.184537	-0.145113	0.1889	0.302012	0.0233767	-0.226625	0.154214	0.0796803	0.152938	-0.941763	0.447675	-0.116348		-0.0938247	-0.0831542	0.00228337	0.296843
441	-0.067981	0.184855	-0.146446	0.189116	0.302109	0.023512	-0.226306	0.153623	0.0799719	0.153036	-0.941861	0.447229	-0.115606		-0.0935888	-0.0828557	0.00239046	0.296668
442	-0.0686806	0.185173	-0.147778	0.189335	0.302197	0.0236434	-0.225983	0.153025	0.0802629	0.153129	-0.941944	0.446788	-0.114897		-0.0933533	-0.082548	0.00250107	0.296476
443	-0.0693893	0.185492	-0.149108	0.189558	0.302278	0.0237708	-0.225657	0.152421	0.0805536	0.153216	-0.942014	0.446353	-0.11422		-0.0931182	-0.0822312	0.00261502	0.296267
444	-0.0701071	0.18581	-0.150436	0.189783	0.30235	0.0238939	-0.225329	0.15181	0.0808442	0.153299	-0.942069	0.445923	-0.113574		-0.0928834	-0.0819057	0.00273216	0.296042
445	-0.070834	0.186127	-0.151763	0.190011	0.302413	0.0240127	-0.224998	0.151192	0.0811349	0.153376	-0.942111	0.445499	-0.112957		-0.0926491	-0.0815715	0.0028523	0.295802
446	-0.0715699	0.186445	-0.153086	0.190241	0.302468	0.0241268	-0.224666	0.15057	0.0814261	0.153448	-0.94214	0.445082	-0.112368		-0.092415	-0.0812288	0.00297527	0.295549
447	-0.0723146	0.186761	-0.154407	0.190472	0.302513	0.0242361	-0.224331	0.149942	0.0817179	0.153516	-0.942157	0.444671	-0.111804		-0.0921813	-0.0808779	0.00310088	0.295283
448	-0.0730682	0.187077	-0.155724	0.190705	0.30255	0.0243405	-0.223996	0.14931	0.0820107	0.153579	-0.942161	0.444266	-0.111263		-0.0919478	-0.080519	0.00322895	0.295005
449	-0.0738305	0.187392	-0.157038	0.190939	0.302577	0.0244397	-0.223659	0.148673	0.0823045	0.153637	-0.942155	0.443867	-0.110745		-0.0917144	-0.0801522	0.00335928	0.294716
450	-0.0746014	0.187706	-0.158348	0.191173	0.302594	0.0245336	-0.223322	0.148033	0.0825998	0.153692	-0.942137	0.443476	-0.110247		-0.0914812	-0.0797778	0.00349169	0.294418
451	-0.0753809	0.188019	-0.159653	0.191408	0.302602	0.024622	-0.222985	0.147389	0.0828966	0.153742	-0.942109	0.443091	-0.109767		-0.0912479	-0.079396	0.00362596	0.294113
452	-0.0761687	0.18833	-0.160954	0.191642	0.302601	0.0247048	-0.222648	0.146742	0.0831953	0.153789	-0.942071	0.442713	-0.109304		-0.0910145	-0.0790069	0.0037619	0.2938
453	-0.0769648	0.18864	-0.16225	0.191875	0.302589	0.0247819	-0.222311	0.146092	0.0834961	0.153832	-0.942023	0.442342	-0.108857		-0.0907809	-0.0786109	0.00389931	0.293481
454	-0.077769	0.188948	-0.163541	0.192108	0.302568	0.0248531	-0.221975	0.14544	0.0837991	0.153872	-0.941967	0.441978	-0.108422		-0.090547	-0.0782082	0.00403797	0.293158
455	-0.0785812	0.189254	-0.164826	0.192339	0.302538	0.0249183	-0.22164	0.144787	0.0841047	0.153909	-0.941903	0.441621	-0.107998		-0.0903126	-0.0777989	0.00417768	0.292832
456	-0.0794012	0.189559	-0.166106	0.192569	0.302497	0.0249774	-0.221306	0.144132	0.0844129	0.153942	-0.941831	0.441271	-0.107584		-0.0900776	-0.0773833	0.00431821	0.292504
457	-0.080229	0.189862	-0.16738	0.192797	0.302447	0.0250303	-0.220974	0.143476	0.0847239	0.153973	-0.941752	0.440928	-0.107178		-0.0898419	-0.0769616	0.00445936	0.292175
458	-0.0810643	0.190163	-0.168648	0.193022	0.302387	0.025077	-0.220645	0.14282	0.085038	0.154002	-0.941666	0.440593	-0.106778		-0.0896052	-0.0765341	0.00460092	0.291847
459	-0.0819069	0.190462	-0.16991	0.193244	0.302317	0.0251173	-0.220317	0.142164	0.0853553	0.154027	-0.941575	0.440265	-0.106382		-0.0893675	-0.076101	0.00474266	0.291522
460	-0.0827567	0.190759	-0.171165	0.193463	0.302237	0.0251512	-0.219992	0.141508	0.0856759	0.154051	-0.941478	0.439944	-0.105989		-0.0891286	-0.0756626	0.00488439	0.291199
461	-0.0836136	0.191053	-0.172413	0.193679	0.302148	0.0251787	-0.219671	0.140853	0.086	0.154073	-0.941376	0.43963	-0.105597		-0.0888882	-0.075219	0.00502588	0.290882
462	-0.0844773	0.191345	-0.173655	0.193891	0.30205	0.0251996	-0.219352	0.140199	0.0863278	0.154093	-0.94127	0.439324	-0.105205		-0.0886462	-0.0747706	0.00516693	0.290571
463	-0.0853475	0.191635	-0.17489	0.194099	0.301941	0.025214	-0.219037	0.139547	0.0866594	0.154112	-0.94116	0.439024	-0.10481		-0.0884025	-0.0743175	0.00530733	0.290267
464	-0.0862242	0.191923	-0.176117	0.194302	0.301824	0.0252218	-0.218726	0.138896	0.0869948	0.154129	-0.941048	0.438732	-0.104411		-0.0881569	-0.07386	0.00544688	0.289971
465	-0.0871072	0.192208	-0.177338	0.1945	0.301697	0.0252231	-0.218419	0.138248	0.0873343	0.154145	-0.940933	0.438447	-0.104007		-0.0879091	-0.0733984	0.00558537	0.289686
466	-0.0879961	0.192491	-0.178551	0.194693	0.301561	0.0252178	-0.218117	0.137603	0.087678	0.154161	-0.940816	0.438168	-0.103596		-0.0876589	-0.0729329	0.00572259	0.289412
467	-0.0888907	0.192771	-0.179757	0.194881	0.301416	0.0252059	-0.217819	0.136962	0.0880259	0.154175	-0.940698	0.437897	-0.103177		-0.0874063	-0.0724638	0.00585834	0.28915
468	-0.0897909	0.193049	-0.180955	0.195063	0.301262	0.0251874	-0.217526	0.136323	0.0883782	0.15419	-0.94058	0.437632	-0.102748		-0.087151	-0.0719913	0.00599241	0.288902
469	-0.0906963	0.193325	-0.182146	0.195239	0.3011	0.0251624	-0.217238	0.135689	0.0887349	0.154204	-0.940462	0.437374	-0.102308		-0.0868928	-0.0715157	0.00612461	0.288668
470	-0.0916067	0.193597	-0.183329	0.195409	0.300928	0.0251308	-0.216956	0.135059	0.0890961	0.154218	-0.940345	0.437123	-0.101854		-0.0866316	-0.0710374	0.00625474	0.288451
471	-0.0925219	0.193868	-0.184505	0.195572	0.300749	0.0250928	-0.216679	0.134433	0.089462	0.154233	-0.940229	0.436878	-0.101387		-0.0863671	-0.0705565	0.00638259	0.28825
472	-0.0934415	0.194136	-0.185673	0.195729	0.300561	0.0250483	-0.216408	0.133813	0.0898325	0.154248	-0.940116	0.436639	-0.100905		-0.0860992	-0.0700734	0.00650797	0.288068
473	-0.0943654	0.194401	-0.186833	0.195878	0.300364	0.0249974	-0.216144	0.133198	0.0902078	0.154263	-0.940005	0.436407	-0.100406		-0.0858277	-0.0695883	0.0066307	0.287904
474	-0.0952931	0.194664	-0.187986	0.19602	0.30016	0.02494	-0.215885	0.132588	0.0905879	0.15428	-0.939897	0.436182	-0.0998898		-0.0855524	-0.0691017	0.00675059	0.287762
475	-0.0962244	0.194924	-0.189132	0.196155	0.299949	0.0248764	-0.215633	0.131985	0.0909729	0.154297	-0.939794	0.435962	-0.0993547		-0.0852732	-0.0686136	0.00686747	0.28764
476	-0.097159	0.195182	-0.19027	0.196283	0.299729	0.0248065	-0.215388	0.131388	0.0913627	0.154316	-0.939695	0.435748	-0.0987999		-0.08499	-0.0681246	0.00698115	0.287541
477	-0.0980966	0.195437	-0.191401	0.196402	0.299503	0.0247303	-0.21515	0.130797	0.0917575	0.154337	-0.939601	0.435541	-0.0982241		-0.0847025	-0.0676348	0.00709148	0.287466
478	-0.099037	0.19569	-0.192525	0.196514	0.299269	0.024648	-0.214919	0.130213	0.0921572	0.154359	-0.939513	0.435339	-0.0976265		-0.0844106	-0.0671445	0.0071983	0.287415
479	-0.0999796	0.195941	-0.193641	0.196618	0.299028	0.0245597	-0.214695	0.129636	0.0925619	0.154383	-0.939431	0.435143	-0.0970058		-0.0841142	-0.0666542	0.00730147	0.287389
480	-0.100924	0.196189	-0.194751	0.196713	0.298781	0.0244653	-0.214478	0.129067	0.0929715	0.154409	-0.939356	0.434952	-0.0963612		-0.0838131	-0.066164	0.00740085	0.28739
481	-0.101871	0.196436	-0.195854	0.196801	0.298527	0.024365	-0.214269	0.128505	0.0933862	0.154437	-0.939289	0.434767	-0.0956917		-0.0835073	-0.0656743	0.0074963	0.287419
482	-0.102819	0.19668	-0.19695	0.19688	0.298266	0.024259	-0.214068	0.127951	0.0938058	0.154468	-0.939229	0.434587	-0.0949962		-0.0831966	-0.0651854	0.00758771	0.287476
483	-0.103768	0.196922	-0.19804	0.196951	0.298	0.0241472	-0.213874	0.127405	0.0942304	0.154501	-0.939178	0.434412	-0.0942739		-0.0828808	-0.0646976	0.00767495	0.287563
484	-0.104718	0.197162	-0.199123	0.197014	0.297728	0.0240297	-0.213689	0.126868	0.09466	0.154537	-0.939136	0.434242	-0.0935239		-0.08256	-0.0642112	0.00775792	0.287679
485	-0.105668	0.1974	-0.200201	0.197069	0.29745	0.0239067	-0.213511	0.126338	0.0950945	0.154575	-0.939104	0.434078	-0.0927453		-0.082234	-0.0637265	0.00783651	0.287827
486	-0.106618	0.197636	-0.201272	0.197115	0.297167	0.0237783	-0.213341	0.125818	0.095534	0.154616	-0.939082	0.433917	-0.0919374		-0.0819027	-0.0632438	0.00791064	0.288007
487	-0.107569	0.197871	-0.202337	0.197152	0.296879	0.0236445	-0.21318	0.125306	0.0959785	0.15466	-0.93907	0.433762	-0.0910995		-0.0815661	-0.0627634	0.00798022	0.28822
488	-0.108518	0.198103	-0.203397	0.197182	0.296586	0.0235054	-0.213026	0.124803	0.0964278	0.154707	-0.939068	0.433611	-0.0902308		-0.0812242	-0.0622856	0.00804518	0.288467
489	-0.109467	0.198335	-0.204451	0.197203	0.296288	0.0233612	-0.212881	0.124308	0.0968821	0.154757	-0.939078	0.433464	-0.0893306		-0.0808768	-0.0618106	0.00810544	0.288748
490	-0.110415	0.198564	-0.205501	0.197216	0.295986	0.0232118	-0.212744	0.123823	0.0973412	0.154811	-0.9391	0.433321	-0.0883985		-0.080524	-0.0613388	0.00816095	0.289064
491	-0.111362	0.198792	-0.206545	0.19722	0.29568	0.0230574	-0.212615	0.123348	0.0978052	0.154867	-0.939133	0.433182	-0.0874338		-0.0801657	-0.0608705	0.00821166	0.289417
492	-0.112307	0.199019	-0.207584	0.197217	0.29537	0.0228981	-0.212494	0.122881	0.098274	0.154927	-0.939179	0.433047	-0.0864361		-0.079802	-0.0604059	0.00825753	0.289807
493	-0.113249	0.199245	-0.208618	0.197206	0.295057	0.022734	-0.212381	0.122424	0.0987476	0.15499	-0.939236	0.432916	-0.0854049		-0.0794328	-0.0599453	0.00829854	0.290234
494	-0.11419	0.199469	-0.209648	0.197187	0.29474	0.0225651	-0.212277	0.121976	0.0992259	0.155056	-0.939307	0.432788	-0.08434		-0.0790582	-0.059489	0.00833467	0.2907
495	-0.115128	0.199693	-0.210673	0.19716	0.29442	0.0223915	-0.21218	0.121537	0.0997089	0.155126	-0.93939	0.432663	-0.0832409		-0.0786781	-0.0590372	0.00836591	0.291204
496	-0.116063	0.199915	-0.211694	0.197126	0.294098	0.0222133	-0.212091	0.121108	0.100197	0.155199	-0.939485	0.432542	-0.0821074		-0.0782926	-0.0585901	0.00839226	0.291748
497	-0.116996	0.200137	-0.212712	0.197084	0.293772	0.0220307	-0.21201	0.120688	0.100689	0.155275	-0.939594	0.432424	-0.080939		-0.0779017	-0.0581481	0.00841373	0.292332
498	-0.117924	0.200358	-0.213725	0.197036	0.293445	0.0218437	-0.211937	0.120277	0.101185	0.155355	-0.939715	0.432308	-0.0797357		-0.0775055	-0.0577113	0.00843034	0.292957
499	-0.11885	0.200579	-0.214735	0.196981	0.293115	0.0216525	-0.211871	0.119875	0.101687	0.155438	-0.939849	0.432195	-0.0784971		-0.0771041	-0.05728	0.00844212	0.293622
500	-0.119771	0.200799	-0.215741	0.196919	0.292783	0.0214571	-0.211813	0.119482	0.102192	0.155525	-0.939996	0.432085	-0.077223		-0.0766974	-0.0568543	0.0084491	0.29433
501	-0.120688	0.201018	-0.216743	0.19685	0.29245	0.0212577	-0.211762	0.119099	0.102702	0.155615	-0.940155	0.431977	-0.0759132		-0.0762856	-0.0564346	0.00845134	0.295079
502	-0.121601	0.201238	-0.217742	0.196776	0.292115	0.0210545	-0.211718	0.118724	0.103216	0.155708	-0.940327	0.431872	-0.0745676		-0.0758688	-0.0560209	0.00844888	0.29587
503	-0.122509	0.201457	-0.218739	0.196695	0.291779	0.0208475	-0.211682	0.118358	0.103734	0.155805	-0.940511	0.431769	-0.0731859		-0.0754469	-0.0556134	0.00844178	0.296703
504	-0.123413	0.201675	-0.219732	0.196609	0.291443	0.020637	-0.211651	0.118	0.104256	0.155905	-0.940706	0.431667	-0.071768		-0.0750202	-0.0552123	0.00843012	0.297579
505	-0.124312	0.201894	-0.220722	0.196518	0.291105	0.020423	-0.211628	0.117651	0.104781	0.156008	-0.940913	0.431568	-0.0703137		-0.0745888	-0.0548177	0.00841397	0.298498
506	-0.125205	0.202113	-0.22171	0.196422	0.290767	0.0202058	-0.21161	0.11731	0.105311	0.156115	-0.94113	0.43147	-0.0688229		-0.0741527	-0.0544297	0.00839342	0.299458
507	-0.126094	0.202332	-0.222694	0.196322	0.290429	0.0199855	-0.211599	0.116977	0.105844	0.156225	-0.941359	0.431373	-0.0672954		-0.073712	-0.0540484	0.00836854	0.300461
508	-0.126976	0.202551	-0.223677	0.196217	0.290091	0.0197623	-0.211593	0.116652	0.10638	0.156339	-0.941597	0.431278	-0.0657312		-0.073267	-0.0536739	0.00833944	0.301505
509	-0.127854	0.20277	-0.224657	0.196108	0.289754	0.0195364	-0.211593	0.116334	0.106919	0.156456	-0.941846	0.431185	-0.0641301		-0.0728177	-0.0533063	0.00830622	0.30259
510	-0.128725	0.20299	-0.225634	0.195995	0.289417	0.019308	-0.211599	0.116024	0.107462	0.156576	-0.942103	0.431092	-0.062492		-0.0723643	-0.0529456	0.00826899	0.303715
511	-0.129591	0.20321	-0.22661	0.19588	0.289081	0.0190772	-0.211609	0.11572	0.108007	0.156699	-0.942369	0.431	-0.0608168		-0.0719069	-0.0525918	0.00822786	0.30488
512	-0.130451	0.203431	-0.227583	0.195761	0.288746	0.0188443	-0.211623	0.115423	0.108555	0.156825	-0.942643	0.43091	-0.0591044		-0.0714458	-0.0522451	0.00818294	0.306084
513	-0.131305	0.203651	-0.228554	0.19564	0.288413	0.0186095	-0.211643	0.115133	0.109105	0.156955	-0.942925	0.43082	-0.0573547		-0.070981	-0.0519053	0.00813433	0.307327
514	-0.132152	0.203873	-0.229523	0.195517	0.288082	0.0183728	-0.211666	0.114849	0.109658	0.157088	-0.943213	0.430731	-0.0555677		-0.0705129	-0.0515725	0.00808216	0.308606
515	-0.132994	0.204095	-0.230491	0.195392	0.287752	0.0181346	-0.211693	0.11457	0.110212	0.157224	-0.943508	0.430642	-0.0537432		-0.0700416	-0.0512467	0.00802652	0.309922
516	-0.13383	0.204317	-0.231456	0.195266	0.287425	0.0178951	-0.211723	0.114297	0.110768	0.157363	-0.943808	0.430553	-0.0518812		-0.0695672	-0.0509278	0.00796752	0.311273
517	-0.134659	0.20454	-0.23242	0.195139	0.287101	0.0176544	-0.211756	0.114029	0.111326	0.157505	-0.944113	0.430465	-0.0499819		-0.0690901	-0.0506157	0.00790528	0.312658
518	-0.135483	0.204764	-0.233382	0.19501	0.28678	0.0174128	-0.211792	0.113766	0.111885	0.15765	-0.944423	0.430378	-0.0480452		-0.0686104	-0.0503105	0.0078399	0.314076
519	-0.1363	0.204988	-0.234342	0.194882	0.286462	0.0171705	-0.21183	0.113507	0.112445	0.157799	-0.944736	0.43029	-0.0460712		-0.0681283	-0.050012	0.00777149	0.315527
520	-0.137112	0.205213	-0.235301	0.194754	0.286148	0.0169277	-0.21187	0.113252	0.113005	0.157951	-0.945052	0.430202	-0.0440602		-0.0676441	-0.0497202	0.00770015	0.317009
521	-0.137917	0.205438	-0.236258	0.194626	0.285837	0.0166846	-0.211912	0.113	0.113566	0.158106	-0.94537	0.430114	-0.0420122		-0.067158	-0.049435	0.00762599	0.31852
522	-0.138717	0.205665	-0.237214	0.194499	0.285531	0.0164414	-0.211955	0.112751	0.114127	0.158264	-0.94569	0.430025	-0.0399276		-0.0666703	-0.0491562	0.00754912	0.320061
523	-0.139511	0.205891	-0.238168	0.194373	0.285229	0.0161984	-0.211999	0.112505	0.114688	0.158425	-0.94601	0.429936	-0.0378065		-0.0661813	-0.0488837	0.00746965	0.321629
524	-0.140299	0.206118	-0.239121	0.194248	0.284932	0.0159558	-0.212043	0.112261	0.115248	0.15859	-0.946331	0.429847	-0.0356493		-0.065691	-0.0486174	0.00738768	0.323225
525	-0.141081	0.206346	-0.240073	0.194125	0.28464	0.0157138	-0.212088	0.112019	0.115808	0.158758	-0.946651	0.429757	-0.0334562		-0.0651999	-0.0483571	0.00730333	0.324846
526	-0.141858	0.206575	-0.241023	0.194005	0.284353	0.0154725	-0.212133	0.111778	0.116366	0.15893	-0.94697	0.429666	-0.0312277		-0.0647082	-0.0481028	0.0072167	0.326492
527	-0.14263	0.206804	-0.241972	0.193887	0.284072	0.0152323	-0.212177	0.111539	0.116923	0.159104	-0.947286	0.429574	-0.0289641		-0.0642161	-0.0478541	0.0071279	0.328161
528	-0.143396	0.207033	-0.242919	0.193771	0.283796	0.0149933	-0.21222	0.111299	0.117477	0.159283	-0.9476	0.429481	-0.0266657		-0.0637239	-0.0476109	0.00703704	0.329853
529	-0.144158	0.207263	-0.243865	0.193659	0.283526	0.0147557	-0.212262	0.11106	0.11803	0.159465	-0.94791	0.429387	-0.0243332		-0.0632319	-0.047373	0.00694423	0.331566
530	-0.144914	0.207493	-0.24481	0.193551	0.283263	0.0145196	-0.212303	0.110819	0.11858	0.15965	-0.948216	0.429291	-0.021967		-0.0627403	-0.0471402	0.00684958	0.3333
531	-0.145667	0.207724	-0.245754	0.193446	0.283006	0.0142854	-0.212342	0.110578	0.119127	0.159839	-0.948517	0.429193	-0.0195678		-0.0622494	-0.0469122	0.0067532	0.335053
532	-0.146414	0.207955	-0.246696	0.193345	0.282755	0.014053	-0.212378	0.110336	0.11967	0.160033	-0.948813	0.429094	-0.0171362		-0.0617593	-0.0466887	0.00665521	0.336824
533	-0.147157	0.208186	-0.247638	0.193249	0.282511	0.0138227	-0.212413	0.110091	0.12021	0.16023	-0.949101	0.428993	-0.0146731		-0.0612705	-0.0464697	0.00655571	0.338611
534	-0.147897	0.208418	-0.248578	0.193157	0.282274	0.0135947	-0.212444	0.109845	0.120745	0.160431	-0.949383	0.42889	-0.0121792		-0.060783	-0.0462547	0.00645482	0.340414
535	-0.148632	0.20865	-0.249516	0.19307	0.282044	0.0133691	-0.212472	0.109595	0.121276	0.160636	-0.949657	0.428785	-0.00965563		-0.0602971	-0.0460434	0.00635264	0.342231
536	-0.149364	0.208882	-0.250454	0.192988	0.281822	0.0131459	-0.212497	0.109342	0.121803	0.160846	-0.949922	0.428677	-0.00710328		-0.0598131	-0.0458356	0.00624927	0.344061
537	-0.150093	0.209115	-0.25139	0.192912	0.281606	0.0129254	-0.212518	0.109085	0.122323	0.16106	-0.950178	0.428566	-0.00452328		-0.0593311	-0.045631	0.00614484	0.345902
538	-0.150818	0.209347	-0.252325	0.192841	0.281398	0.0127077	-0.212535	0.108824	0.122839	0.161279	-0.950424	0.428453	-0.00191681		-0.0588514	-0.0454292	0.00603943	0.347752
539	-0.151541	0.20958	-0.253259	0.192776	0.281198	0.0124927	-0.212547	0.108559	0.123348	0.161502	-0.95066	0.428337	0.000714844		-0.058374	-0.0452299	0.00593315	0.349611
540	-0.152261	0.209813	-0.254191	0.192717	0.281005	0.0122807	-0.212555	0.108288	0.12385	0.161731	-0.950885	0.428218	0.00337033		-0.0578992	-0.0450327	0.00582609	0.351477
541	-0.152979	0.210047	-0.255123	0.192665	0.28082	0.0120717	-0.212558	0.108012	0.124346	0.161964	-0.951098	0.428096	0.00604822		-0.0574272	-0.0448374	0.00571837	0.353349
542	-0.153694	0.21028	-0.256053	0.192619	0.280643	0.0118659	-0.212555	0.10773	0.124834	0.162203	-0.951299	0.427971	0.00874703		-0.0569581	-0.0446435	0.00561006	0.355224
543	-0.154408	0.210514	-0.256982	0.19258	0.280473	0.0116631	-0.212547	0.107442	0.125315	0.162447	-0.951487	0.427843	0.0114652		-0.0564922	-0.0444507	0.00550126	0.357101
544	-0.155121	0.210748	-0.257909	0.192547	0.280312	0.0114636	-0.212533	0.107147	0.125787	0.162697	-0.951662	0.427711	0.0142012		-0.0560295	-0.0442586	0.00539207	0.35898
545	-0.155832	0.210983	-0.258836	0.192522	0.280158	0.0112674	-0.212513	0.106845	0.126252	0.162952	-0.951823	0.427575	0.0169533		-0.0555702	-0.0440668	0.00528256	0.360859
546	-0.156542	0.211217	-0.259761	0.192504	0.280013	0.0110745	-0.212487	0.106536	0.126707	0.163213	-0.95197	0.427436	0.0197197		-0.0551147	-0.043875	0.00517282	0.362735
547	-0.157252	0.211452	-0.260685	0.192493	0.279875	0.010885	-0.212454	0.106219	0.127153	0.163481	-0.952103	0.427294	0.0224987		-0.0546629	-0.0436827	0.00506295	0.364609
548	-0.157961	0.211687	-0.261607	0.19249	0.279746	0.0106988	-0.212414	0.105894	0.127589	0.163755	-0.95222	0.427148	0.0252884		-0.0542151	-0.0434895	0.004953	0.366478
549	-0.158671	0.211922	-0.262528	0.192494	0.279624	0.0105161	-0.212367	0.105561	0.128016	0.164035	-0.952323	0.426998	0.0280869		-0.0537715	-0.0432951	0.00484308	0.368342
550	-0.15938	0.212158	-0.263447	0.192505	0.279511	0.0103368	-0.212313	0.105219	0.128432	0.164322	-0.952409	0.426844	0.0308924		-0.0533321	-0.043099	0.00473325	0.370199
551	-0.160091	0.212394	-0.264365	0.192525	0.279405	0.0101609	-0.212252	0.104868	0.128837	0.164616	-0.95248	0.426687	0.0337028		-0.0528973	-0.0429008	0.00462359	0.372048
552	-0.160802	0.21263	-0.265282	0.192552	0.279306	0.00998854	-0.212183	0.104508	0.129232	0.164916	-0.952535	0.426526	0.0365163		-0.0524671	-0.0427002	0.00451416	0.373888
553	-0.161514	0.212867	-0.266196	0.192587	0.279216	0.00981957	-0.212106	0.104139	0.129615	0.165224	-0.952573	0.426361	0.0393309		-0.0520418	-0.0424966	0.00440503	0.375717
554	-0.162228	0.213103	-0.267109	0.19263	0.279132	0.00965405	-0.212021	0.10376	0.129986	0.16554	-0.952595	0.426192	0.0421445		-0.0516214	-0.0422897	0.00429627	0.377535
555	-0.162944	0.213341	-0.26802	0.192681	0.279056	0.00949196	-0.211929	0.103372	0.130346	0.165863	-0.952601	0.42602	0.0449552		-0.0512062	-0.0420791	0.00418794	0.379339
556	-0.163662	0.213578	-0.26893	0.19274	0.278987	0.00933327	-0.211828	0.102973	0.130693	0.166194	-0.95259	0.425845	0.0477611		-0.0507963	-0.0418643	0.00408008	0.38113
557	-0.164382	0.213816	-0.269837	0.192807	0.278925	0.00917796	-0.211719	0.102564	0.131028	0.166532	-0.952562	0.425666	0.0505601		-0.050392	-0.041645	0.00397277	0.382905
558	-0.165105	0.214054	-0.270742	0.192881	0.27887	0.00902601	-0.211601	0.102145	0.13135	0.166879	-0.952517	0.425483	0.0533503		-0.0499933	-0.0414207	0.00386605	0.384664
559	-0.165831	0.214293	-0.271645	0.192964	0.278821	0.00887736	-0.211475	0.101716	0.131658	0.167234	-0.952456	0.425297	0.0561297		-0.0496006	-0.041191	0.00375998	0.386406
560	-0.166561	0.214532	-0.272546	0.193055	0.278778	0.00873198	-0.211341	0.101277	0.131954	0.167598	-0.952379	0.425108	0.0588964		-0.0492139	-0.0409557	0.0036546	0.388128
561	-0.167294	0.214772	-0.273444	0.193154	0.278741	0.00858981	-0.211197	0.100826	0.132236	0.16797	-0.952285	0.424916	0.0616484		-0.0488336	-0.0407142	0.00354997	0.38983
562	-0.16803	0.215012	-0.274339	0.19326	0.278709	0.00845082	-0.211045	0.100366	0.132504	0.16835	-0.952175	0.42472	0.064384		-0.0484597	-0.0404663	0.00344612	0.391511
563	-0.168771	0.215253	-0.275232	0.193375	0.278683	0.00831492	-0.210885	0.0998945	0.132758	0.16874	-0.952049	0.424522	0.0671011		-0.0480926	-0.0402116	0.00334312	0.393169
564	-0.169516	0.215494	-0.276122	0.193497	0.278662	0.00818206	-0.210715	0.0994126	0.132998	0.169138	-0.951907	0.424321	0.0697979		-0.0477324	-0.0399496	0.00324099	0.394803
565	-0.170266	0.215735	-0.277009	0.193627	0.278646	0.00805217	-0.210537	0.09892	0.133224	0.169546	-0.951749	0.424117	0.0724727		-0.0473794	-0.0396801	0.00313977	0.396412
566	-0.17102	0.215978	-0.277893	0.193765	0.278634	0.00792515	-0.21035	0.0984168	0.133435	0.169962	-0.951576	0.423911	0.0751237		-0.0470338	-0.0394028	0.00303951	0.397994
567	-0.17178	0.21622	-0.278774	0.19391	0.278626	0.00780092	-0.210154	0.0979029	0.133632	0.170388	-0.951388	0.423702	0.0777491		-0.0466958	-0.0391173	0.00294023	0.399548
568	-0.172544	0.216464	-0.279651	0.194063	0.278622	0.00767939	-0.20995	0.0973784	0.133815	0.170823	-0.951185	0.423491	0.0803472		-0.0463657	-0.0388233	0.00284196	0.401073
569	-0.173314	0.216707	-0.280525	0.194223	0.278621	0.00756044	-0.209737	0.0968434	0.133982	0.171267	-0.950968	0.423277	0.0829163		-0.0460438	-0.0385205	0.00274473	0.402566
570	-0.17409	0.216952	-0.281395	0.194391	0.278623	0.00744398	-0.209515	0.0962979	0.134135	0.171721	-0.950737	0.423062	0.0854549		-0.0457303	-0.0382086	0.00264858	0.404028
571	-0.174871	0.217197	-0.282261	0.194566	0.278628	0.00732989	-0.209285	0.095742	0.134274	0.172184	-0.950493	0.422844	0.0879614		-0.0454253	-0.0378874	0.00255351	0.405456
572	-0.175658	0.217443	-0.283123	0.194747	0.278635	0.00721803	-0.209046	0.0951758	0.134397	0.172656	-0.950236	0.422625	0.0904343		-0.0451293	-0.0375565	0.00245957	0.406849
573	-0.176451	0.217689	-0.283981	0.194936	0.278644	0.00710829	-0.208799	0.0945993	0.134506	0.173138	-0.949965	0.422404	0.0928724		-0.0448424	-0.0372159	0.00236678	0.408205
574	-0.17725	0.217936	-0.284835	0.195131	0.278654	0.00700052	-0.208544	0.0940128	0.1346	0.17363	-0.949683	0.422182	0.0952744		-0.0445649	-0.0368651	0.00227515	0.409524
575	-0.178056	0.218184	-0.285683	0.195333	0.278666	0.00689459	-0.208281	0.0934164	0.134679	0.17413	-0.949389	0.421958	0.0976392		-0.0442971	-0.036504	0.0021847	0.410805
576	-0.178868	0.218433	-0.286527	0.195541	0.278679	0.00679034	-0.208009	0.0928102	0.134744	0.17464	-0.949084	0.421733	0.0999658		-0.0440392	-0.0361324	0.00209546	0.412045
577	-0.179687	0.218682	-0.287366	0.195755	0.278692	0.00668761	-0.20773	0.0921943	0.134794	0.17516	-0.948769	0.421507	0.102253		-0.0437914	-0.03575	0.00200743	0.413244
578	-0.180513	0.218932	-0.288199	0.195975	0.278705	0.00658625	-0.207443	0.091569	0.13483	0.175689	-0.948443	0.421279	0.104501		-0.043554	-0.0353568	0.00192064	0.4144
579	-0.181345	0.219183	-0.289027	0.196201	0.278718	0.0064861	-0.207148	0.0909344	0.134851	0.176227	-0.948107	0.421051	0.106707		-0.0433273	-0.0349524	0.00183511	0.415514
580	-0.182184	0.219435	-0.289849	0.196432	0.278731	0.00638699	-0.206846	0.0902907	0.134858	0.176774	-0.947762	0.420822	0.108873		-0.0431114	-0.0345368	0.00175084	0.416583
581	-0.183031	0.219688	-0.290664	0.196668	0.278742	0.00628876	-0.206537	0.0896382	0.13485	0.17733	-0.947408	0.420593	0.110996		-0.0429067	-0.0341098	0.00166787	0.417606
582	-0.183884	0.219942	-0.291474	0.19691	0.278752	0.00619126	-0.206221	0.088977	0.134829	0.177896	-0.947046	0.420364	0.113078		-0.0427133	-0.0336713	0.00158619	0.418583
583	-0.184745	0.220196	-0.292276	0.197155	0.27876	0.00609431	-0.205897	0.0883073	0.134794	0.17847	-0.946676	0.420134	0.115116		-0.0425315	-0.0332211	0.00150585	0.419513
584	-0.185612	0.220452	-0.293071	0.197406	0.278767	0.00599777	-0.205567	0.0876295	0.134745	0.179054	-0.946299	0.419904	0.117111		-0.0423615	-0.0327591	0.00142684	0.420394
585	-0.186487	0.220708	-0.293859	0.19766	0.278771	0.00590148	-0.205231	0.0869437	0.134682	0.179646	-0.945915	0.419674	0.119062		-0.0422034	-0.0322853	0.00134919	0.421226
586	-0.18737	0.220966	-0.29464	0.197918	0.278772	0.00580527	-0.204888	0.0862502	0.134606	0.180247	-0.945524	0.419444	0.120969		-0.0420576	-0.0317996	0.0012729	0.422007
587	-0.18826	0.221224	-0.295412	0.19818	0.278771	0.005709	-0.204539	0.0855492	0.134517	0.180857	-0.945128	0.419215	0.122833		-0.0419241	-0.0313019	0.00119801	0.422738
588	-0.189157	0.221484	-0.296176	0.198444	0.278766	0.0056125	-0.204185	0.084841	0.134415	0.181475	-0.944727	0.418986	0.124652		-0.0418032	-0.0307922	0.00112453	0.423416
589	-0.190061	0.221745	-0.296931	0.198712	0.278757	0.0055156	-0.203824	0.084126	0.1343	0.182102	-0.94432	0.418758	0.126428		-0.0416951	-0.0302704	0.00105247	0.424043
590	-0.190973	0.222007	-0.297678	0.198982	0.278744	0.00541817	-0.203459	0.0834043	0.134172	0.182737	-0.943909	0.418531	0.128159		-0.0415998	-0.0297364	0.000981865	0.424616
591	-0.191892	0.22227	-0.298415	0.199254	0.278728	0.00532003	-0.203088	0.0826764	0.134032	0.183381	-0.943494	0.418305	0.129846		-0.0415177	-0.0291904	0.000912739	0.425135
592	-0.192819	0.222535	-0.299142	0.199527	0.278706	0.00522104	-0.202712	0.0819425	0.13388	0.184032	-0.943075	0.418079	0.131489		-0.0414487	-0.0286322	0.000845119	0.4256
593	-0.193752	0.222801	-0.299859	0.199802	0.27868	0.00512104	-0.202332	0.081203	0.133715	0.184692	-0.942653	0.417855	0.133088		-0.0413931	-0.028062	0.000779034	0.42601
594	-0.194693	0.223068	-0.300566	0.200078	0.278649	0.0050199	-0.201947	0.0804582	0.133539	0.18536	-0.942227	0.417632	0.134644		-0.041351	-0.0274797	0.000714513	0.426364
595	-0.195642	0.223336	-0.301262	0.200355	0.278612	0.00491747	-0.201559	0.0797085	0.133351	0.186036	-0.941799	0.41741	0.136156		-0.0413225	-0.0268855	0.000651585	0.426663
596	-0.196597	0.223606	-0.301947	0.200631	0.278569	0.00481362	-0.201166	0.0789542	0.133152	0.18672	-0.941368	0.41719	0.137627		-0.0413077	-0.0262793	0.00059028	0.426906
597	-0.197559	0.223878	-0.30262	0.200908	0.278521	0.00470823	-0.200769	0.0781957	0.132942	0.187411	-0.940935	0.416971	0.139054		-0.0413066	-0.0256612	0.000530626	0.427092
598	-0.198528	0.22415	-0.303282	0.201184	0.278466	0.00460119	-0.20037	0.0774334	0.13272	0.18811	-0.9405	0.416754	0.140441		-0.0413195	-0.0250314	0.000472651	0.427221
599	-0.199505	0.224425	-0.303931	0.201459	0.278404	0.00449237	-0.199967	0.0766676	0.132488	0.188817	-0.940063	0.416538	0.141786		-0.0413463	-0.02439	0.000416383	0.427292
600	-0.200487	0.2247	-0.304567	0.201733	0.278336	0.00438169	-0.199561	0.0758987	0.132244	0.189531	-0.939624	0.416325	0.14309		-0.041387	-0.0237371	0.000361848	0.427305
601	-0.201477	0.224978	-0.305191	0.202005	0.278261	0.00426905	-0.199152	0.0751272	0.131991	0.190253	-0.939184	0.416113	0.144356		-0.0414418	-0.0230728	0.000309067	0.427261
602	-0.202472	0.225257	-0.305802	0.202275	0.278179	0.00415437	-0.198742	0.0743534	0.131727	0.190981	-0.938743	0.415903	0.145582		-0.0415106	-0.0223974	0.000258059	0.427157
603	-0.203474	0.225538	-0.306399	0.202542	0.278089	0.00403757	-0.198329	0.0735777	0.131453	0.191717	-0.9383	0.415695	0.146771		-0.0415934	-0.021711	0.000208837	0.426995
604	-0.204482	0.225821	-0.306982	0.202806	0.277991	0.00391858	-0.197914	0.0728006	0.131169	0.19246	-0.937856	0.41549	0.147922		-0.0416902	-0.0210138	0.000161412	0.426774
605	-0.205496	0.226105	-0.307551	0.203067	0.277885	0.00379735	-0.197498	0.0720223	0.130875	0.19321	-0.937411	0.415286	0.149038		-0.041801	-0.0203061	0.000115791	0.426493
606	-0.206516	0.226392	-0.308105	0.203325	0.277771	0.00367382	-0.19708	0.0712433	0.130571	0.193967	-0.936965	0.415085	0.150118		-0.0419257	-0.0195881	7.19776e-05	0.426153
607	-0.207541	0.226681	-0.308644	0.203578	0.277649	0.00354795	-0.196662	0.0704641	0.130257	0.194731	-0.936518	0.414885	0.151165		-0.0420642	-0.0188601	2.99736e-05	0.425753
608	-0.208572	0.226971	-0.309169	0.203826	0.277518	0.0034197	-0.196243	0.0696849	0.129935	0.195501	-0.93607	0.414688	0.152179		-0.0422164	-0.0181223	-1.02232e-05	0.425293
609	-0.209608	0.227264	-0.309678	0.20407	0.277378	0.00328905	-0.195823	0.0689063	0.129602	0.196278	-0.935621	0.414493	0.153161		-0.0423822	-0.0173749	-4.86166e-05	0.424774
610	-0.210648	0.22756	-0.310171	0.204308	0.277229	0.00315596	-0.195403	0.0681285	0.129261	0.197061	-0.935171	0.414301	0.154112		-0.0425616	-0.0166184	-8.52115e-05	0.424196
611	-0.211694	0.227858	-0.310648	0.20454	0.277071	0.00302044	-0.194984	0.0673521	0.128911	0.197851	-0.93472	0.41411	0.155034		-0.0427542	-0.015853	-0.000120012	0.423558
612	-0.212743	0.228158	-0.31111	0.204766	0.276903	0.00288247	-0.194564	0.0665773	0.128551	0.198646	-0.934268	0.413922	0.155928		-0.04296	-0.015079	-0.000153024	0.42286
613	-0.213797	0.228461	-0.311555	0.204985	0.276726	0.00274205	-0.194146	0.0658045	0.128183	0.199448	-0.933815	0.413736	0.156795		-0.0431787	-0.0142968	-0.000184251	0.422103
614	-0.214855	0.228766	-0.311984	0.205197	0.276539	0.0025992	-0.193728	0.0650342	0.127806	0.200255	-0.933361	0.413552	0.157636		-0.0434102	-0.0135066	-0.000213697	0.421287
615	-0.215917	0.229074	-0.312396	0.205402	0.276342	0.00245392	-0.193312	0.0642666	0.12742	0.201068	-0.932905	0.413371	0.158453		-0.0436541	-0.0127088	-0.000241365	0.420412
616	-0.216982	0.229385	-0.312792	0.205598	0.276135	0.00230625	-0.192897	0.0635022	0.127026	0.201887	-0.932449	0.413192	0.159245		-0.0439103	-0.0119037	-0.000267258	0.419479
617	-0.218051	0.229699	-0.313171	0.205787	0.275917	0.00215622	-0.192484	0.0627414	0.126623	0.202711	-0.93199	0.413015	0.160016		-0.0441784	-0.0110918	-0.000291378	0.418487
618	-0.219122	0.230015	-0.313533	0.205967	0.275689	0.00200387	-0.192073	0.0619844	0.126212	0.20354	-0.931531	0.412841	0.160765		-0.0444582	-0.0102733	-0.00031373	0.417438
619	-0.220196	0.230335	-0.313878	0.206137	0.27545	0.00184925	-0.191664	0.0612316	0.125792	0.204374	-0.931069	0.412668	0.161494		-0.0447492	-0.00944864	-0.00033432	0.416332
620	-0.221272	0.230657	-0.314205	0.206299	0.275201	0.00169241	-0.191258	0.0604834	0.125364	0.205213	-0.930605	0.412498	0.162205		-0.0450513	-0.00861815	-0.000353156	0.415169
621	-0.22235	0.230982	-0.314516	0.206451	0.27494	0.00153341	-0.190855	0.0597402	0.124929	0.206056	-0.93014	0.412331	0.162898		-0.045364	-0.00778222	-0.000370253	0.41395
622	-0.22343	0.231311	-0.31481	0.206592	0.274669	0.00137231	-0.190455	0.0590022	0.124485	0.206904	-0.929672	0.412165	0.163574		-0.0456869	-0.00694122	-0.000385628	0.412676
623	-0.224511	0.231642	-0.315086	0.206723	0.274386	0.00120919	-0.190059	0.0582699	0.124033	0.207756	-0.929201	0.412002	0.164235		-0.0460198	-0.00609553	-0.000399303	0.411348
624	-0.225593	0.231977	-0.315345	0.206843	0.274092	0.00104411	-0.189666	0.0575435	0.123573	0.208612	-0.928727	0.411841	0.164882		-0.046362	-0.00524555	-0.000411302	0.409966
625	-0.226676	0.232315	-0.315587	0.206953	0.273787	0.000877143	-0.189278	0.0568235	0.123105	0.209472	-0.928251	0.411683	0.165515		-0.0467134	-0.00439167	-0.000421653	0.408532
626	-0.227759	0.232656	-0.315812	0.207051	0.27347	0.000708372	-0.188893	0.0561101	0.12263	0.210336	-0.927771	0.411526	0.166136		-0.0470733	-0.00353429	-0.000430384	0.407047
627	-0.228842	0.233	-0.316019	0.207137	0.273142	0.000537877	-0.188513	0.0554036	0.122147	0.211202	-0.927287	0.411372	0.166746		-0.0474415	-0.00267381	-0.000437522	0.405511
628	-0.229925	0.233348	-0.31621	0.207211	0.272803	0.000365751	-0.188138	0.0547045	0.121657	0.212072	-0.926799	0.41122	0.167346		-0.0478175	-0.00181063	-0.000443095	0.403927
629	-0.231007	0.233699	-0.316383	0.207273	0.272451	0.00019209	-0.187768	0.054013	0.121159	0.212945	-0.926307	0.41107	0.167937		-0.0482009	-0.000945158	-0.00044713	0.402294
630	-0.232088	0.234053	-0.316539	0.207323	0.272088	1.69995e-05	-0.187403	0.0533295	0.120653	0.213821	-0.92581	0.410922	0.16852		-0.0485912	-7.78043e-05	-0.000449655	0.400614
631	-0.233167	0.234411	-0.316679	0.20736	0.271714	-0.000159407	-0.187043	0.0526541	0.120141	0.214699	-0.925309	0.410776	0.169096		-0.048988	0.000791021	-0.000450697	0.398889
632	-0.234244	0.234771	-0.316802	0.207384	0.271327	-0.000337014	-0.186688	0.0519874	0.119621	0.21558	-0.924802	0.410633	0.169666		-0.0493909	0.0016609	-0.000450289	0.397119
633	-0.235319	0.235136	-0.316907	0.207394	0.270929	-0.000515697	-0.18634	0.0513295	0.119093	0.216462	-0.92429	0.410491	0.17023		-0.0497995	0.00253141	-0.000448465	0.395306
634	-0.236391	0.235503	-0.316997	0.207392	0.27052	-0.000695331	-0.185997	0.0506807	0.118559	0.217347	-0.923771	0.41035	0.170789		-0.0502134	0.00340213	-0.00044526	0.393451
635	-0.23746	0.235874	-0.317069	0.207376	0.270098	-0.000875782	-0.185661	0.0500413	0.118018	0.218233	-0.923247	0.410212	0.171345		-0.0506321	0.00427261	-0.000440711	0.391556
636	-0.238525	0.236249	-0.317126	0.207346	0.269665	-0.00105691	-0.185331	0.0494116	0.117469	0.219121	-0.922716	0.410076	0.171898		-0.0510552	0.00514243	-0.000434855	0.389621
637	-0.239587	0.236626	-0.317166	0.207303	0.26922	-0.00123858	-0.185007	0.0487918	0.116914	0.22001	-0.922179	0.409941	0.172448		-0.0514824	0.00601112	-0.000427732	0.387648
638	-0.240644	0.237008	-0.317189	0.207245	0.268764	-0.00142063	-0.184689	0.0481822	0.116352	0.2209	-0.921635	0.409808	0.172996		-0.0519132	0.00687826	-0.000419376	0.385639
639	-0.241696	0.237393	-0.317197	0.207173	0.268296	-0.0016029	-0.184378	0.0475831	0.115783	0.221791	-0.921084	0.409676	0.173543		-0.0523473	0.00774337	-0.000409825	0.383594
640	-0.242743	0.237781	-0.317189	0.207087	0.267816	-0.00178523	-0.184074	0.0469947	0.115208	0.222682	-0.920526	0.409545	0.174088		-0.0527842	0.008606	-0.000399116	0.381514
641	-0.243785	0.238174	-0.317165	0.206986	0.267325	-0.00196745	-0.183777	0.0464171	0.114626	0.223574	-0.919961	0.409417	0.174633		-0.0532236	0.00946568	-0.000387285	0.379402
642	-0.24482	0.23857	-0.317126	0.206871	0.266823	-0.00214938	-0.183487	0.0458507	0.114037	0.224466	-0.919388	0.409289	0.175177		-0.0536652	0.010322	-0.00037437	0.377259
643	-0.245849	0.23897	-0.317071	0.206741	0.266309	-0.00233084	-0.183204	0.0452956	0.113441	0.225357	-0.918807	0.409162	0.17572		-0.0541085	0.0111743	-0.00036041	0.375085
644	-0.246872	0.239374	-0.317002	0.206596	0.265784	-0.00251163	-0.182928	0.0447521	0.11284	0.226248	-0.91822	0.409037	0.176264		-0.0545533	0.0120224	-0.000345441	0.372881
645	-0.247887	0.239782	-0.316917	0.206437	0.265248	-0.00269158	-0.182659	0.0442202	0.112231	0.227139	-0.917624	0.408913	0.176807		-0.0549993	0.0128656	-0.000329503	0.370651
646	-0.248894	0.240194	-0.316817	0.206263	0.264701	-0.00287048	-0.182397	0.0437002	0.111617	0.228028	-0.917021	0.408789	0.17735		-0.055446	0.0137034	-0.000312633	0.368393
647	-0.249893	0.24061	-0.316703	0.206073	0.264143	-0.00304814	-0.182142	0.0431923	0.110996	0.228916	-0.91641	0.408666	0.177892		-0.0558931	0.0145355	-0.000294872	0.36611
648	-0.250884	0.241031	-0.316575	0.205869	0.263574	-0.00322435	-0.181895	0.0426965	0.110369	0.229802	-0.915791	0.408544	0.178435		-0.0563405	0.0153614	-0.000276259	0.363802
649	-0.251866	0.241455	-0.316432	0.20565	0.262995	-0.00339891	-0.181655	0.0422131	0.109736	0.230687	-0.915165	0.408423	0.178977		-0.0567878	0.0161805	-0.000256831	0.361472
650	-0.252839	0.241884	-0.316276	0.205416	0.262405	-0.0035716	-0.181422	0.0417421	0.109096	0.231569	-0.914531	0.408302	0.179517		-0.0572346	0.0169924	-0.000236626	0.359119
651	-0.253801	0.242317	-0.316106	0.205167	0.261805	-0.00374221	-0.181197	0.0412836	0.10845	0.232448	-0.91389	0.408182	0.180057		-0.0576808	0.0177966	-0.000215683	0.356745
652	-0.254754	0.242754	-0.315923	0.204903	0.261195	-0.00391053	-0.180978	0.0408377	0.107799	0.233324	-0.913241	0.408061	0.180595		-0.0581261	0.0185928	-0.000194038	0.354352
653	-0.255696	0.243195	-0.315726	0.204624	0.260575	-0.00407635	-0.180767	0.0404045	0.107141	0.234197	-0.912585	0.407941	0.181132		-0.0585703	0.0193803	-0.000171724	0.351939
654	-0.256628	0.243641	-0.315517	0.20433	0.259946	-0.00423945	-0.180563	0.039984	0.106478	0.235066	-0.911922	0.407821	0.181665		-0.059013	0.0201588	-0.000148774	0.34951
655	-0.257548	0.244091	-0.315295	0.204021	0.259307	-0.00439962	-0.180366	0.0395764	0.105808	0.235931	-0.911251	0.407701	0.182196		-0.059454	0.0209278	-0.000125217	0.347063
656	-0.258456	0.244545	-0.315061	0.203698	0.258658	-0.00455667	-0.180177	0.0391816	0.105133	0.236791	-0.910574	0.40758	0.182724		-0.0598931	0.0216869	-0.000101078	0.344602
657	-0.259353	0.245004	-0.314815	0.203361	0.258001	-0.00471038	-0.179994	0.0387996	0.104452	0.237646	-0.90989	0.40746	0.183248		-0.0603301	0.0224357	-7.63797e-05	0.342126
658	-0.260237	0.245467	-0.314557	0.203009	0.257335	-0.00486057	-0.179818	0.0384305	0.103766	0.238495	-0.909199	0.407338	0.183767		-0.0607646	0.0231738	-5.11407e-05	0.339638
659	-0.261108	0.245934	-0.314288	0.202643	0.25666	-0.00500704	-0.179648	0.0380741	0.103074	0.239338	-0.908503	0.407216	0.184281		-0.0611964	0.0239008	-2.53758e-05	0.337138
660	-0.261966	0.246405	-0.314007	0.202262	0.255977	-0.0051496	-0.179485	0.0377306	0.102376	0.240174	-0.9078	0.407094	0.184789		-0.0616253	0.0246162	9.03835e-07	0.334627
661	-0.262811	0.246881	-0.313716	0.201868	0.255286	-0.00528806	-0.179329	0.0373997	0.101673	0.241003	-0.907092	0.40697	0.185291		-0.0620509	0.0253199	2.76911e-05	0.332107
662	-0.263642	0.247361	-0.313413	0.20146	0.254588	-0.00542225	-0.179179	0.0370815	0.100964	0.241825	-0.906379	0.406846	0.185787		-0.0624729	0.0260113	5.49828e-05	0.329578
663	-0.264459	0.247845	-0.3131	0.201039	0.253881	-0.00555197	-0.179035	0.0367757	0.10025	0.242638	-0.90566	0.40672	0.186275		-0.0628912	0.0266902	8.27789e-05	0.327043
664	-0.265262	0.248333	-0.312778	0.200604	0.253168	-0.00567706	-0.178898	0.0364824	0.0995314	0.243443	-0.904938	0.406592	0.186755		-0.0633053	0.0273563	0.000111083	0.324502
665	-0.26605	0.248826	-0.312445	0.200156	0.252447	-0.00579736	-0.178766	0.0362014	0.0988073	0.244238	-0.904211	0.406464	0.187226		-0.0637151	0.0280093	0.000139901	0.321957
666	-0.266823	0.249322	-0.312102	0.199695	0.251721	-0.00591268	-0.178639	0.0359324	0.0980781	0.245023	-0.903481	0.406333	0.187688		-0.0641202	0.0286489	0.000169244	0.319408
667	-0.267581	0.249822	-0.31175	0.199221	0.250987	-0.00602287	-0.178519	0.0356754	0.0973439	0.245798	-0.902747	0.4062	0.18814		-0.0645204	0.0292748	0.000199127	0.316857
668	-0.268323	0.250327	-0.311388	0.198736	0.250248	-0.00612778	-0.178403	0.0354301	0.0966049	0.246562	-0.902012	0.406066	0.188582		-0.0649154	0.0298869	0.000229566	0.314306
669	-0.26905	0.250835	-0.311018	0.198238	0.249503	-0.00622725	-0.178292	0.0351963	0.095861	0.247314	-0.901273	0.405929	0.189012		-0.0653049	0.0304849	0.000260582	0.311755
670	-0.26976	0.251346	-0.310639	0.197728	0.248753	-0.00632112	-0.178186	0.0349738	0.0951125	0.248054	-0.900534	0.405789	0.189431		-0.0656888	0.0310685	0.000292199	0.309205
671	-0.270454	0.251862	-0.310251	0.197206	0.247998	-0.00640925	-0.178085	0.0347623	0.0943593	0.248782	-0.899793	0.405647	0.189837		-0.0660667	0.0316377	0.000324443	0.306659
672	-0.271132	0.252381	-0.309855	0.196673	0.247239	-0.0064915	-0.177988	0.0345615	0.0936016	0.249496	-0.899052	0.405502	0.19023		-0.0664384	0.0321921	0.000357343	0.304116
673	-0.271793	0.252904	-0.309451	0.196129	0.246475	-0.00656771	-0.177895	0.0343712	0.0928394	0.250196	-0.89831	0.405353	0.190609		-0.0668037	0.0327318	0.000390933	0.301579
674	-0.272437	0.25343	-0.309039	0.195575	0.245708	-0.00663775	-0.177806	0.0341909	0.092073	0.250882	-0.897569	0.405201	0.190974		-0.0671623	0.0332566	0.000425247	0.299049
675	-0.273064	0.253959	-0.308619	0.19501	0.244937	-0.00670148	-0.177721	0.0340205	0.0913022	0.251553	-0.896829	0.405045	0.191324		-0.0675141	0.0337663	0.000460323	0.296527
676	-0.273674	0.254492	-0.308191	0.194435	0.244163	-0.00675878	-0.177639	0.0338596	0.0905273	0.252207	-0.89609	0.404885	0.191658		-0.0678588	0.0342609	0.000496201	0.294014
677	-0.274266	0.255027	-0.307756	0.19385	0.243387	-0.00680951	-0.17756	0.0337077	0.0897483	0.252846	-0.895354	0.404721	0.191976		-0.0681962	0.0347402	0.000532922	0.291511
678	-0.274841	0.255566	-0.307314	0.193256	0.242609	-0.00685356	-0.177484	0.0335645	0.0889653	0.253468	-0.894619	0.404553	0.192276		-0.0685262	0.0352043	0.000570527	0.28902
679	-0.275398	0.256108	-0.306865	0.192652	0.24183	-0.00689082	-0.177411	0.0334296	0.0881784	0.254072	-0.893888	0.404379	0.192557		-0.0688484	0.0356531	0.000609059	0.286543
680	-0.275937	0.256652	-0.30641	0.19204	0.241049	-0.00692116	-0.17734	0.0333027	0.0873877	0.254658	-0.893159	0.404201	0.19282		-0.0691627	0.0360866	0.000648562	0.284079
681	-0.276459	0.257199	-0.305947	0.19142	0.240268	-0.00694449	-0.177271	0.0331832	0.0865933	0.255226	-0.892434	0.404018	0.193062		-0.069469	0.0365049	0.000689078	0.28163
682	-0.276963	0.257749	-0.305478	0.190792	0.239486	-0.00696069	-0.177204	0.0330708	0.0857952	0.255774	-0.891714	0.403828	0.193283		-0.0697671	0.0369078	0.000730648	0.279198
683	-0.277449	0.258301	-0.305003	0.190156	0.238705	-0.00696967	-0.177139	0.032965	0.0849936	0.256302	-0.890998	0.403633	0.193481		-0.0700568	0.0372955	0.00077331	0.276783
684	-0.277917	0.258855	-0.304521	0.189512	0.237924	-0.0069713	-0.177075	0.0328654	0.0841885	0.25681	-0.890286	0.403432	0.193657		-0.0703379	0.037668	0.000817101	0.274387
685	-0.278367	0.259412	-0.304033	0.188862	0.237145	-0.00696549	-0.177012	0.0327714	0.08338	0.257297	-0.88958	0.403225	0.193808		-0.0706103	0.0380255	0.000862057	0.272009
686	-0.2788	0.259971	-0.303539	0.188206	0.236367	-0.00695213	-0.17695	0.0326827	0.0825681	0.257763	-0.888879	0.403011	0.193934		-0.0708738	0.0383679	0.000908212	0.269653
687	-0.279215	0.260531	-0.30304	0.187543	0.235591	-0.0069311	-0.176889	0.0325987	0.0817529	0.258206	-0.888185	0.40279	0.194034		-0.0711283	0.0386954	0.000955604	0.267318
688	-0.279612	0.261093	-0.302535	0.186875	0.234818	-0.00690231	-0.176828	0.0325189	0.0809344	0.258627	-0.887496	0.402562	0.194106		-0.0713736	0.0390082	0.00100427	0.265005
689	-0.279992	0.261657	-0.302024	0.186201	0.234048	-0.00686565	-0.176767	0.0324429	0.0801128	0.259025	-0.886814	0.402326	0.19415		-0.0716096	0.0393064	0.00105425	0.262716
690	-0.280355	0.262222	-0.301508	0.185522	0.233282	-0.00682102	-0.176706	0.0323702	0.0792879	0.259399	-0.886138	0.402083	0.194165		-0.0718361	0.0395901	0.00110558	0.260451
691	-0.280701	0.262789	-0.300987	0.184839	0.232519	-0.00676833	-0.176644	0.0323002	0.07846	0.259749	-0.88547	0.401831	0.19415		-0.0720529	0.0398596	0.0011583	0.258211
692	-0.281029	0.263357	-0.30046	0.184151	0.231762	-0.00670748	-0.176582	0.0322324	0.0776289	0.260074	-0.884808	0.401572	0.194103		-0.0722598	0.0401151	0.00121246	0.255998
693	-0.281341	0.263926	-0.299929	0.18346	0.231009	-0.00663839	-0.176519	0.0321664	0.0767947	0.260374	-0.884153	0.401304	0.194024		-0.0724568	0.0403567	0.00126811	0.253812
694	-0.281637	0.264496	-0.299392	0.182765	0.230262	-0.00656096	-0.176454	0.0321016	0.0759574	0.260648	-0.883506	0.401027	0.193912		-0.0726435	0.0405848	0.00132527	0.251653
695	-0.281917	0.265067	-0.298851	0.182067	0.22952	-0.00647514	-0.176388	0.0320375	0.0751171	0.260896	-0.882866	0.400742	0.193765		-0.0728199	0.0407997	0.001384	0.249523
696	-0.28218	0.265638	-0.298305	0.181366	0.228785	-0.00638085	-0.176321	0.0319737	0.0742736	0.261118	-0.882234	0.400447	0.193584		-0.0729856	0.0410015	0.00144434	0.247422
697	-0.282428	0.26621	-0.297754	0.180663	0.228057	-0.00627802	-0.176251	0.0319095	0.073427	0.261312	-0.881609	0.400143	0.193366		-0.0731406	0.0411906	0.00150633	0.24535
698	-0.282661	0.266782	-0.297199	0.179958	0.227336	-0.00616661	-0.176179	0.0318446	0.0725773	0.261479	-0.880992	0.399829	0.193112		-0.0732846	0.0413674	0.00157003	0.243308
699	-0.282878	0.267354	-0.296639	0.179252	0.226623	-0.00604656	-0.176105	0.0317783	0.0717244	0.261619	-0.880382	0.399506	0.192821		-0.0734175	0.0415321	0.00163547	0.241296
700	-0.283081	0.267926	-0.296075	0.178544	0.225918	-0.00591783	-0.176028	0.0317102	0.0708683	0.26173	-0.879781	0.399173	0.192491		-0.073539	0.041685	0.0017027	0.239315
701	-0.28327	0.268498	-0.295507	0.177835	0.225221	-0.0057804	-0.175948	0.0316398	0.070009	0.261813	-0.879187	0.398829	0.192122		-0.0736491	0.0418266	0.00177179	0.237364
702	-0.283444	0.26907	-0.294935	0.177125	0.224534	-0.00563423	-0.175865	0.0315667	0.0691464	0.261867	-0.8786	0.398476	0.191714		-0.0737474	0.0419573	0.00184277	0.235444
703	-0.283605	0.269642	-0.294358	0.176415	0.223855	-0.00547931	-0.175778	0.0314902	0.0682805	0.261891	-0.878021	0.398111	0.191266		-0.073834	0.0420773	0.00191572	0.233554
704	-0.283753	0.270213	-0.293777	0.175706	0.223186	-0.00531563	-0.175688	0.03141	0.0674112	0.261887	-0.87745	0.397737	0.190777		-0.0739085	0.0421871	0.00199068	0.231694
705	-0.283888	0.270783	-0.293192	0.174996	0.222527	-0.0051432	-0.175594	0.0313256	0.0665385	0.261852	-0.876886	0.397352	0.190247		-0.0739708	0.0422872	0.00206772	0.229865
706	-0.28401	0.271352	-0.292603	0.174287	0.221878	-0.00496202	-0.175496	0.0312365	0.0656623	0.261788	-0.87633	0.396956	0.189676		-0.0740209	0.0423779	0.00214689	0.228066
707	-0.284121	0.271921	-0.29201	0.17358	0.22124	-0.0047721	-0.175394	0.0311423	0.0647825	0.261693	-0.875781	0.396549	0.189064		-0.0740585	0.0424596	0.00222825	0.226296
708	-0.28422	0.272488	-0.291413	0.172873	0.220613	-0.00457348	-0.175287	0.0310426	0.0638991	0.261568	-0.875239	0.396132	0.188409		-0.0740835	0.0425329	0.00231187	0.224556
709	-0.284307	0.273054	-0.290812	0.172169	0.219996	-0.00436619	-0.175176	0.0309369	0.063012	0.261413	-0.874703	0.395703	0.187713		-0.0740957	0.0425982	0.00239779	0.222844
710	-0.284384	0.273619	-0.290207	0.171466	0.219391	-0.00415027	-0.17506	0.0308247	0.0621212	0.261227	-0.874175	0.395264	0.186976		-0.0740952	0.0426559	0.00248608	0.22116
711	-0.284451	0.274182	-0.289598	0.170766	0.218798	-0.00392579	-0.174939	0.0307058	0.0612266	0.26101	-0.873653	0.394813	0.186196		-0.0740818	0.0427065	0.0025768	0.219504
712	-0.284508	0.274743	-0.288985	0.170068	0.218216	-0.00369279	-0.174813	0.0305798	0.0603282	0.260762	-0.873138	0.394352	0.185375		-0.0740553	0.0427504	0.00267001	0.217875
713	-0.284556	0.275302	-0.288368	0.169373	0.217646	-0.00345136	-0.174682	0.0304461	0.0594258	0.260483	-0.872628	0.39388	0.184513		-0.0740158	0.0427882	0.00276578	0.216273
714	-0.284595	0.27586	-0.287748	0.168681	0.217088	-0.00320158	-0.174545	0.0303046	0.0585195	0.260173	-0.872125	0.393397	0.18361		-0.0739631	0.0428204	0.00286416	0.214697
715	-0.284626	0.276415	-0.287124	0.167992	0.216543	-0.00294352	-0.174403	0.0301548	0.0576091	0.259831	-0.871627	0.392903	0.182667		-0.0738973	0.0428472	0.00296522	0.213145
716	-0.284648	0.276968	-0.286496	0.167308	0.21601	-0.00267728	-0.174256	0.0299965	0.0566946	0.259459	-0.871135	0.392398	0.181684		-0.0738182	0.0428693	0.00306904	0.211619
717	-0.284664	0.277518	-0.285864	0.166627	0.215489	-0.00240297	-0.174102	0.0298293	0.055776	0.259056	-0.870648	0.391883	0.180662		-0.073726	0.0428871	0.00317567	0.210116
718	-0.284672	0.278066	-0.285229	0.165951	0.214981	-0.00212068	-0.173943	0.0296528	0.0548532	0.258621	-0.870166	0.391357	0.179602		-0.0736206	0.042901	0.0032852	0.208637
719	-0.284673	0.278612	-0.284589	0.165279	0.214486	-0.00183053	-0.173778	0.029467	0.0539261	0.258156	-0.86969	0.39082	0.178504		-0.0735021	0.0429115	0.00339768	0.207181
720	-0.284669	0.279154	-0.283946	0.164611	0.214003	-0.00153266	-0.173608	0.0292714	0.0529948	0.257659	-0.869218	0.390273	0.17737		-0.0733704	0.042919	0.00351319	0.205747
721	-0.284659	0.279694	-0.2833	0.163949	0.213534	-0.00122718	-0.173431	0.0290659	0.0520591	0.257132	-0.86875	0.389716	0.176201		-0.0732257	0.042924	0.00363178	0.204334
722	-0.284644	0.280231	-0.28265	0.163292	0.213077	-0.000914244	-0.173248	0.0288503	0.0511191	0.256574	-0.868287	0.389149	0.174997		-0.0730681	0.0429269	0.00375353	0.202942
723	-0.284624	0.280764	-0.281996	0.16264	0.212633	-0.000593994	-0.173059	0.0286242	0.0501747	0.255986	-0.867829	0.388571	0.173761		-0.0728977	0.0429281	0.00387849	0.20157
724	-0.2846	0.281295	-0.281339	0.161993	0.212202	-0.000266586	-0.172863	0.0283877	0.0492259	0.255367	-0.867374	0.387984	0.172494		-0.0727145	0.042928	0.00400671	0.200218
725	-0.284572	0.281822	-0.280678	0.161352	0.211784	6.78168e-05	-0.172662	0.0281404	0.0482727	0.254718	-0.866923	0.387387	0.171196		-0.0725188	0.0429271	0.00413826	0.198885
726	-0.28454	0.282346	-0.280014	0.160717	0.211379	0.000409044	-0.172453	0.0278823	0.0473152	0.254039	-0.866477	0.386781	0.169869		-0.0723107	0.0429258	0.00427317	0.19757
727	-0.284505	0.282866	-0.279346	0.160088	0.210986	0.000756919	-0.172239	0.0276133	0.0463532	0.25333	-0.866034	0.386165	0.168516		-0.0720905	0.0429244	0.0044115	0.196272
728	-0.284468	0.283383	-0.278675	0.159465	0.210607	0.00111126	-0.172018	0.0273331	0.0453869	0.252592	-0.865594	0.38554	0.167137		-0.0718583	0.0429233	0.00455328	0.194992
729	-0.284429	0.283896	-0.278001	0.158849	0.21024	0.00147187	-0.171791	0.0270419	0.0444162	0.251824	-0.865158	0.384906	0.165733		-0.0716143	0.0429229	0.00469855	0.193729
730	-0.284387	0.284406	-0.277323	0.158238	0.209886	0.00183856	-0.171557	0.0267393	0.0434412	0.251028	-0.864726	0.384263	0.164308		-0.0713588	0.0429237	0.00484735	0.192481
731	-0.284344	0.284911	-0.276641	0.157634	0.209544	0.00221113	-0.171317	0.0264255	0.0424619	0.250203	-0.864297	0.383611	0.162861		-0.0710922	0.0429258	0.0049997	0.191249
732	-0.2843	0.285413	-0.275957	0.157037	0.209215	0.00258936	-0.17107	0.0261004	0.0414784	0.249349	-0.863871	0.38295	0.161396		-0.0708146	0.0429298	0.00515564	0.190032
733	-0.284255	0.285912	-0.275269	0.156446	0.208898	0.00297303	-0.170817	0.0257639	0.0404907	0.248468	-0.863449	0.382281	0.159913		-0.0705263	0.0429358	0.00531517	0.188829
734	-0.284209	0.286406	-0.274578	0.155862	0.208593	0.00336193	-0.170558	0.0254161	0.0394989	0.247559	-0.86303	0.381604	0.158415		-0.0702277	0.0429443	0.00547832	0.18764
735	-0.284164	0.286896	-0.273884	0.155284	0.208301	0.00375582	-0.170292	0.025057	0.0385032	0.246623	-0.862614	0.380918	0.156902		-0.0699192	0.0429556	0.0056451	0.186465
736	-0.284118	0.287382	-0.273187	0.154714	0.20802	0.00415447	-0.17002	0.0246866	0.0375035	0.245659	-0.862201	0.380225	0.155378		-0.069601	0.04297	0.00581551	0.185301
737	-0.284073	0.287864	-0.272487	0.15415	0.207751	0.00455763	-0.169741	0.024305	0.0365	0.244669	-0.861791	0.379524	0.153843		-0.0692735	0.0429877	0.00598957	0.184149
738	-0.284028	0.288341	-0.271783	0.153593	0.207493	0.00496505	-0.169456	0.0239123	0.0354928	0.243654	-0.861384	0.378814	0.1523		-0.068937	0.043009	0.00616726	0.183008
739	-0.283984	0.288815	-0.271077	0.153042	0.207246	0.00537648	-0.169165	0.0235085	0.034482	0.242612	-0.860979	0.378098	0.150751		-0.0685919	0.0430343	0.0063486	0.181878
740	-0.283941	0.289283	-0.270368	0.152499	0.207011	0.00579166	-0.168867	0.0230938	0.0334678	0.241545	-0.860578	0.377373	0.149197		-0.0682384	0.0430636	0.00653357	0.180756
741	-0.2839	0.289748	-0.269656	0.151963	0.206786	0.00621032	-0.168563	0.0226683	0.0324503	0.240453	-0.860179	0.376642	0.14764		-0.0678771	0.0430974	0.00672216	0.179643
742	-0.28386	0.290208	-0.268941	0.151433	0.206572	0.00663219	-0.168254	0.0222321	0.0314296	0.239336	-0.859783	0.375903	0.146082		-0.0675081	0.0431358	0.00691436	0.178537
743	-0.283822	0.290664	-0.268224	0.15091	0.206368	0.00705702	-0.167938	0.0217853	0.0304058	0.238196	-0.859389	0.375157	0.144524		-0.0671319	0.043179	0.00711014	0.177437
744	-0.283785	0.291115	-0.267504	0.150394	0.206174	0.00748453	-0.167616	0.0213283	0.0293793	0.237032	-0.858997	0.374405	0.14297		-0.0667487	0.0432273	0.00730949	0.176343
745	-0.283751	0.291561	-0.266781	0.149884	0.205989	0.00791445	-0.167288	0.0208611	0.02835	0.235845	-0.858608	0.373645	0.14142		-0.066359	0.0432809	0.00751236	0.175253
746	-0.283719	0.292002	-0.266056	0.149381	0.205814	0.00834651	-0.166955	0.0203839	0.0273182	0.234635	-0.858221	0.372879	0.139877		-0.065963	0.0433398	0.00771873	0.174167
747	-0.283689	0.292439	-0.265329	0.148885	0.205648	0.00878044	-0.166616	0.0198971	0.026284	0.233402	-0.857835	0.372106	0.138342		-0.0655612	0.0434044	0.00792855	0.173083
748	-0.283661	0.292871	-0.264599	0.148395	0.20549	0.00921598	-0.166272	0.0194007	0.0252477	0.232148	-0.857451	0.371327	0.136818		-0.065154	0.0434748	0.00814178	0.172001
749	-0.283636	0.293298	-0.263867	0.147911	0.205341	0.00965287	-0.165922	0.0188952	0.0242094	0.230873	-0.857069	0.370542	0.135305		-0.0647416	0.0435511	0.00835837	0.170919
750	-0.283614	0.293721	-0.263132	0.147433	0.205201	0.0100908	-0.165567	0.0183806	0.0231693	0.229576	-0.856688	0.369751	0.133806		-0.0643244	0.0436336	0.00857826	0.169837
751	-0.283594	0.294138	-0.262396	0.146961	0.205067	0.0105296	-0.165206	0.0178574	0.0221275	0.22826	-0.856308	0.368954	0.132323		-0.063903	0.0437223	0.00880139	0.168753
752	-0.283577	0.29455	-0.261657	0.146495	0.204941	0.0109688	-0.164841	0.0173257	0.0210844	0.226923	-0.855929	0.368151	0.130857		-0.0634775	0.0438173	0.00902771	0.167666
753	-0.283563	0.294957	-0.260917	0.146035	0.204823	0.0114084	-0.164471	0.0167859	0.02004	0.225566	-0.85555	0.367342	0.129411		-0.0630486	0.0439188	0.00925713	0.166576
754	-0.283553	0.295359	-0.260175	0.145579	0.20471	0.0118479	-0.164096	0.0162383	0.0189946	0.224191	-0.855171	0.366528	0.127985		-0.0626165	0.0440269	0.00948958	0.165482
755	-0.283545	0.295756	-0.259431	0.145129	0.204605	0.0122872	-0.163717	0.0156833	0.0179483	0.222797	-0.854793	0.365708	0.126582		-0.0621816	0.0441416	0.00972498	0.164382
756	-0.28354	0.296148	-0.258686	0.144684	0.204505	0.012726	-0.163334	0.0151211	0.0169014	0.221385	-0.854413	0.364883	0.125204		-0.0617444	0.0442631	0.00996326	0.163276
757	-0.283538	0.296535	-0.257938	0.144243	0.204411	0.013164	-0.162946	0.0145521	0.0158541	0.219955	-0.854033	0.364052	0.123851		-0.0613053	0.0443913	0.0102043	0.162163
758	-0.28354	0.296916	-0.25719	0.143806	0.204323	0.013601	-0.162555	0.0139766	0.0148066	0.218509	-0.853652	0.363217	0.122526		-0.0608647	0.0445264	0.0104481	0.161041
759	-0.283545	0.297292	-0.25644	0.143374	0.204239	0.0140368	-0.16216	0.0133951	0.013759	0.217046	-0.853268	0.362376	0.121231		-0.060423	0.0446683	0.0106944	0.159912
760	-0.283553	0.297662	-0.255689	0.142945	0.204161	0.0144711	-0.161762	0.0128078	0.0127116	0.215566	-0.852883	0.36153	0.119966		-0.0599806	0.0448171	0.0109432	0.158773
761	-0.283565	0.298028	-0.254936	0.142519	0.204087	0.0149037	-0.16136	0.0122153	0.0116646	0.214071	-0.852495	0.360679	0.118734		-0.0595379	0.0449727	0.0111944	0.157624
762	-0.28358	0.298388	-0.254182	0.142096	0.204017	0.0153344	-0.160956	0.0116178	0.0106182	0.212561	-0.852103	0.359824	0.117537		-0.0590954	0.0451352	0.0114478	0.156464
763	-0.283598	0.298742	-0.253428	0.141676	0.203952	0.015763	-0.160548	0.0110158	0.00957243	0.211036	-0.851709	0.358963	0.116375		-0.0586535	0.0453045	0.0117035	0.155292
764	-0.283619	0.299091	-0.252672	0.141259	0.20389	0.0161893	-0.160138	0.0104096	0.00852765	0.209497	-0.85131	0.358098	0.115252		-0.0582125	0.0454807	0.0119611	0.154109
765	-0.283644	0.299435	-0.251915	0.140843	0.203832	0.0166131	-0.159726	0.0097997	0.00748399	0.207945	-0.850907	0.357228	0.114167		-0.0577729	0.0456636	0.0122207	0.152913
766	-0.283672	0.299773	-0.251158	0.140429	0.203777	0.0170342	-0.159312	0.00918649	0.00644163	0.206379	-0.850498	0.356354	0.113124		-0.057335	0.0458533	0.0124821	0.151703
767	-0.283703	0.300106	-0.2504	0.140017	0.203726	0.0174525	-0.158896	0.00857039	0.00540073	0.204801	-0.850085	0.355475	0.112122		-0.0568991	0.0460496	0.0127452	0.150479
768	-0.283738	0.300433	-0.249641	0.139605	0.203677	0.0178677	-0.158478	0.00795182	0.00436149	0.203211	-0.849665	0.354591	0.111165		-0.0564657	0.0462524	0.0130098	0.149242
769	-0.283776	0.300755	-0.248881	0.139194	0.20363	0.0182798	-0.158059	0.00733121	0.00332405	0.201609	-0.849239	0.353703	0.110254		-0.0560349	0.0464617	0.0132759	0.147989
770	-0.283817	0.301072	-0.248122	0.138783	0.203587	0.0186885	-0.157639	0.00670898	0.00228858	0.199996	-0.848806	0.35281	0.109389		-0.0556072	0.0466772	0.0135433	0.146721
771	-0.283861	0.301383	-0.247362	0.138372	0.203545	0.0190938	-0.157218	0.00608559	0.00125525	0.198372	-0.848365	0.351913	0.108573		-0.0551826	0.046899	0.013812	0.145438
772	-0.283908	0.301689	-0.246601	0.13796	0.203506	0.0194954	-0.156797	0.00546146	0.000224195	0.196739	-0.847916	0.351011	0.107807		-0.0547616	0.0471268	0.0140817	0.144138
773	-0.283958	0.30199	-0.245841	0.137548	0.203469	0.0198933	-0.156376	0.00483704	-0.000804419	0.195095	-0.847459	0.350105	0.107092		-0.0543442	0.0473604	0.0143523	0.142823
774	-0.284011	0.302285	-0.245081	0.137134	0.203433	0.0202874	-0.155954	0.00421277	-0.00183045	0.193443	-0.846993	0.349194	0.106429		-0.0539307	0.0475997	0.0146237	0.141492
775	-0.284067	0.302575	-0.244321	0.136718	0.203399	0.0206774	-0.155533	0.0035891	-0.00285375	0.191782	-0.846517	0.348279	0.10582		-0.0535212	0.0478444	0.0148959	0.140144
776	-0.284126	0.30286	-0.243561	0.1363	0.203367	0.0210634	-0.155113	0.00296647	-0.00387419	0.190113	-0.846031	0.34736	0.105265		-0.0531159	0.0480943	0.0151686	0.13878
777	-0.284187	0.30314	-0.242802	0.13588	0.203337	0.0214452	-0.154694	0.00234535	-0.00489163	0.188436	-0.845535	0.346436	0.104766		-0.0527149	0.0483493	0.0154417	0.137399
778	-0.284251	0.303414	-0.242043	0.135457	0.203307	0.0218227	-0.154276	0.00172617	-0.00590595	0.186753	-0.845028	0.345507	0.104324		-0.0523183	0.048609	0.0157151	0.136002
779	-0.284318	0.303684	-0.241285	0.13503	0.203279	0.0221959	-0.153859	0.0011094	-0.00691702	0.185063	-0.844509	0.344575	0.103939		-0.0519264	0.0488731	0.0159886	0.134589
780	-0.284387	0.303948	-0.240528	0.1346	0.203253	0.0225646	-0.153445	0.000495494	-0.00792473	0.183367	-0.843979	0.343637	0.103612		-0.0515391	0.0491415	0.0162621	0.13316
781	-0.284458	0.304208	-0.239773	0.134166	0.203227	0.0229287	-0.153033	-0.000115091	-0.00892895	0.181666	-0.843436	0.342695	0.103344		-0.0511565	0.0494138	0.0165355	0.131715
782	-0.284532	0.304463	-0.239019	0.133728	0.203203	0.0232883	-0.152623	-0.000721897	-0.00992958	0.17996	-0.84288	0.341749	0.103135		-0.0507787	0.0496896	0.0168086	0.130254
783	-0.284608	0.304713	-0.238266	0.133285	0.20318	0.0236431	-0.152217	-0.00132447	-0.0109265	0.17825	-0.842312	0.340798	0.102986		-0.0504059	0.0499688	0.0170813	0.128778
784	-0.284686	0.304958	-0.237515	0.132837	0.203158	0.0239932	-0.151814	-0.00192234	-0.0119197	0.176536	-0.841729	0.339843	0.102897		-0.0500379	0.0502511	0.0173534	0.127287
785	-0.284765	0.305198	-0.236766	0.132383	0.203137	0.0243385	-0.151414	-0.00251507	-0.0129089	0.174819	-0.841133	0.338883	0.102868		-0.0496749	0.0505359	0.0176248	0.125782
786	-0.284847	0.305434	-0.23602	0.131924	0.203117	0.0246789	-0.151018	-0.0031022	-0.0138941	0.173099	-0.840522	0.337918	0.1029		-0.0493168	0.0508232	0.0178953	0.124263
787	-0.28493	0.305666	-0.235276	0.131459	0.203099	0.0250144	-0.150627	-0.00368328	-0.0148752	0.171378	-0.839897	0.336949	0.102992		-0.0489636	0.0511124	0.0181648	0.122731
788	-0.285014	0.305893	-0.234534	0.130987	0.203082	0.0253448	-0.15024	-0.00425786	-0.0158522	0.169655	-0.839257	0.335976	0.103144		-0.0486154	0.0514033	0.0184331	0.121187
789	-0.2851	0.306116	-0.233796	0.130508	0.203066	0.0256702	-0.149858	-0.0048255	-0.0168249	0.167931	-0.838602	0.334998	0.103357		-0.0482722	0.0516956	0.0187	0.119631
790	-0.285187	0.306335	-0.23306	0.130023	0.203051	0.0259906	-0.149481	-0.00538576	-0.0177932	0.166207	-0.837931	0.334015	0.103629		-0.0479338	0.0519888	0.0189654	0.118064
791	-0.285274	0.306549	-0.232328	0.12953	0.203038	0.0263058	-0.14911	-0.00593819	-0.0187571	0.164483	-0.837245	0.333028	0.103961		-0.0476003	0.0522826	0.0192291	0.116488
792	-0.285363	0.306759	-0.2316	0.129029	0.203026	0.026616	-0.148745	-0.00648237	-0.0197165	0.162761	-0.836543	0.332036	0.104352		-0.0472716	0.0525767	0.019491	0.114903
793	-0.285452	0.306966	-0.230875	0.128521	0.203015	0.026921	-0.148386	-0.00701788	-0.0206712	0.16104	-0.835825	0.331039	0.104801		-0.0469476	0.0528708	0.0197508	0.11331
794	-0.285542	0.307169	-0.230155	0.128004	0.203007	0.0272208	-0.148034	-0.00754428	-0.0216214	0.159321	-0.83509	0.330038	0.105308		-0.0466284	0.0531644	0.0200085	0.111711
795	-0.285632	0.307367	-0.229439	0.127478	0.202999	0.0275155	-0.147688	-0.00806117	-0.0225667	0.157605	-0.83434	0.329032	0.105873		-0.0463138	0.0534573	0.0202639	0.110106
796	-0.285722	0.307562	-0.228728	0.126944	0.202994	0.027805	-0.14735	-0.00856815	-0.0235072	0.155893	-0.833573	0.328021	0.106494		-0.0460037	0.053749	0.0205168	0.108497
797	-0.285812	0.307754	-0.228021	0.126401	0.20299	0.0280894	-0.147019	-0.00906483	-0.0244429	0.154185	-0.83279	0.327005	0.10717		-0.0456981	0.0540393	0.020767	0.106884
798	-0.285901	0.307942	-0.22732	0.125849	0.202989	0.0283687	-0.146696	-0.00955083	-0.0253735	0.152481	-0.831991	0.325985	0.107901		-0.045397	0.0543277	0.0210144	0.105269
799	-0.28599	0.308126	-0.226624	0.125287	0.202989	0.028643	-0.146381	-0.0100258	-0.0262991	0.150783	-0.831175	0.324959	0.108686		-0.0451001	0.0546141	0.0212588	0.103652
800	-0.286079	0.308307	-0.225934	0.124716	0.202991	0.0289122	-0.146074	-0.0104893	-0.0272196	0.149091	-0.830344	0.323929	0.109522		-0.0448074	0.054898	0.0215001	0.102036
801	-0.286166	0.308485	-0.225249	0.124135	0.202995	0.0291764	-0.145775	-0.0109411	-0.028135	0.147405	-0.829496	0.322893	0.11041		-0.0445189	0.055179	0.0217381	0.100421
802	-0.286253	0.30866	-0.224571	0.123544	0.203002	0.0294357	-0.145485	-0.0113808	-0.0290451	0.145726	-0.828632	0.321853	0.111348		-0.0442343	0.055457	0.0219727	0.0988085
803	-0.286338	0.308831	-0.2239	0.122943	0.203011	0.02969	-0.145205	-0.011808	-0.0299499	0.144056	-0.827753	0.320807	0.112334		-0.0439537	0.0557314	0.0222037	0.0971994
804	-0.286422	0.308999	-0.223234	0.122332	0.203022	0.0299396	-0.144933	-0.0122226	-0.0308494	0.142394	-0.826858	0.319756	0.113367		-0.0436768	0.056002	0.0224309	0.0955951
805	-0.286503	0.309164	-0.222576	0.12171	0.203035	0.0301845	-0.144671	-0.0126241	-0.0317435	0.14074	-0.825947	0.318699	0.114447		-0.0434036	0.0562685	0.0226543	0.0939967
806	-0.286583	0.309326	-0.221925	0.121078	0.203051	0.0304246	-0.144418	-0.0130123	-0.0326321	0.139097	-0.825022	0.317637	0.115571		-0.043134	0.0565305	0.0228736	0.0924054
807	-0.286661	0.309484	-0.221282	0.120435	0.20307	0.0306602	-0.144174	-0.0133869	-0.0335153	0.137464	-0.824081	0.31657	0.116737		-0.0428678	0.0567876	0.0230889	0.0908223
808	-0.286736	0.30964	-0.220646	0.119782	0.203091	0.0308913	-0.143941	-0.0137477	-0.0343929	0.135841	-0.823126	0.315497	0.117946		-0.042605	0.0570396	0.0232998	0.0892484
809	-0.286808	0.309793	-0.220018	0.119118	0.203114	0.031118	-0.143718	-0.0140945	-0.035265	0.13423	-0.822157	0.314419	0.119194		-0.0423454	0.057286	0.0235064	0.0876849
810	-0.286877	0.309944	-0.219398	0.118444	0.20314	0.0313404	-0.143504	-0.0144269	-0.0361315	0.13263	-0.821174	0.313334	0.12048		-0.0420889	0.0575265	0.0237085	0.0861327
811	-0.286944	0.310091	-0.218786	0.117759	0.203169	0.0315586	-0.143301	-0.0147449	-0.0369924	0.131043	-0.820177	0.312244	0.121803		-0.0418355	0.0577609	0.023906	0.0845929
812	-0.287006	0.310236	-0.218184	0.117064	0.203201	0.0317728	-0.143108	-0.0150482	-0.0378477	0.129469	-0.819167	0.311148	0.12316		-0.0415851	0.0579887	0.0240989	0.0830663
813	-0.287065	0.310377	-0.21759	0.116358	0.203236	0.031983	-0.142926	-0.0153367	-0.0386973	0.127909	-0.818144	0.310046	0.12455		-0.0413375	0.0582096	0.024287	0.081554
814	-0.28712	0.310517	-0.217005	0.115642	0.203274	0.0321895	-0.142754	-0.0156102	-0.0395413	0.126362	-0.817109	0.308938	0.12597		-0.0410927	0.0584233	0.0244702	0.0800569
815	-0.287171	0.310653	-0.21643	0.114916	0.203315	0.0323923	-0.142593	-0.0158685	-0.0403797	0.12483	-0.816062	0.307824	0.127419		-0.0408506	0.0586295	0.0246485	0.0785758
816	-0.287217	0.310787	-0.215864	0.114179	0.203358	0.0325915	-0.142442	-0.0161116	-0.0412124	0.123313	-0.815004	0.306704	0.128896		-0.0406112	0.0588278	0.0248219	0.0771116
817	-0.287259	0.310919	-0.215308	0.113433	0.203405	0.0327874	-0.142301	-0.0163393	-0.0420395	0.121812	-0.813934	0.305577	0.130397		-0.0403742	0.059018	0.0249902	0.075665
818	-0.287295	0.311048	-0.214763	0.112677	0.203456	0.0329801	-0.142171	-0.0165516	-0.042861	0.120326	-0.812854	0.304444	0.13192		-0.0401398	0.0591997	0.0251534	0.0742367
819	-0.287327	0.311174	-0.214227	0.111911	0.203509	0.0331697	-0.142052	-0.0167483	-0.0436769	0.118857	-0.811764	0.303305	0.133465		-0.0399077	0.0593725	0.0253115	0.0728274
820	-0.287353	0.311298	-0.213702	0.111137	0.203566	0.0333564	-0.141943	-0.0169294	-0.0444872	0.117404	-0.810665	0.302159	0.135028		-0.0396779	0.0595363	0.0254644	0.0714377
821	-0.287373	0.311419	-0.213187	0.110353	0.203627	0.0335404	-0.141845	-0.0170949	-0.045292	0.115969	-0.809557	0.301007	0.136607		-0.0394505	0.0596907	0.0256121	0.0700681
822	-0.287387	0.311538	-0.212683	0.10956	0.203691	0.0337217	-0.141757	-0.0172448	-0.0460912	0.114551	-0.80844	0.299847	0.138201		-0.0392252	0.0598354	0.0257545	0.0687191
823	-0.287396	0.311655	-0.212191	0.108759	0.203758	0.0339006	-0.14168	-0.017379	-0.0468849	0.113152	-0.807315	0.298682	0.139806		-0.0390021	0.0599701	0.0258917	0.0673912
824	-0.287398	0.311769	-0.211709	0.107949	0.203829	0.0340772	-0.141613	-0.0174976	-0.0476733	0.11177	-0.806184	0.297509	0.141422		-0.0387812	0.0600946	0.0260235	0.0660849
825	-0.287393	0.311881	-0.211239	0.107132	0.203904	0.0342517	-0.141555	-0.0176006	-0.0484562	0.110408	-0.805045	0.29633	0.143045		-0.0385623	0.0602086	0.02615	0.0648006
826	-0.287382	0.31199	-0.21078	0.106307	0.203983	0.0344242	-0.141508	-0.0176881	-0.0492338	0.109065	-0.803901	0.295144	0.144674		-0.0383454	0.0603119	0.0262712	0.0635386
827	-0.287364	0.312097	-0.210333	0.105475	0.204066	0.034595	-0.141471	-0.0177602	-0.0500061	0.107741	-0.802751	0.293951	0.146306		-0.0381305	0.0604041	0.026387	0.0622992
828	-0.287338	0.312201	-0.209897	0.104637	0.204152	0.0347641	-0.141444	-0.017817	-0.0507732	0.106437	-0.801595	0.292751	0.14794		-0.0379176	0.060485	0.0264974	0.0610828
829	-0.287306	0.312304	-0.209474	0.103792	0.204243	0.0349318	-0.141426	-0.0178585	-0.0515352	0.105153	-0.800436	0.291545	0.149572		-0.0377066	0.0605545	0.0266025	0.0598897
830	-0.287266	0.312403	-0.209062	0.10294	0.204337	0.0350982	-0.141418	-0.0178849	-0.052292	0.103889	-0.799272	0.290331	0.151201		-0.0374976	0.0606122	0.0267023	0.0587199
831	-0.287218	0.312501	-0.208663	0.102084	0.204436	0.0352635	-0.141418	-0.0178964	-0.0530439	0.102646	-0.798106	0.289111	0.152825		-0.0372905	0.0606579	0.0267967	0.0575738
832	-0.287163	0.312596	-0.208275	0.101222	0.204539	0.0354278	-0.141428	-0.0178932	-0.0537909	0.101424	-0.796936	0.287884	0.154442		-0.0370854	0.0606914	0.0268858	0.0564514
833	-0.287099	0.312688	-0.207901	0.100355	0.204645	0.0355915	-0.141447	-0.0178754	-0.054533	0.100223	-0.795765	0.28665	0.156049		-0.0368822	0.0607125	0.0269695	0.0553529
834	-0.287028	0.312779	-0.207538	0.0994836	0.204756	0.0357545	-0.141474	-0.0178433	-0.0552704	0.0990437	-0.794591	0.285409	0.157645		-0.036681	0.060721	0.027048	0.0542783
835	-0.286948	0.312866	-0.207188	0.0986085	0.204871	0.0359172	-0.14151	-0.0177971	-0.0560032	0.0978856	-0.793417	0.284162	0.159228		-0.0364818	0.0607167	0.0271212	0.0532278
836	-0.28686	0.312952	-0.206851	0.0977299	0.204991	0.0360797	-0.141553	-0.0177371	-0.0567315	0.0967493	-0.792242	0.282907	0.160795		-0.0362845	0.0606994	0.0271892	0.0522013
837	-0.286764	0.313035	-0.206526	0.0968484	0.205114	0.0362421	-0.141605	-0.0176635	-0.0574553	0.0956349	-0.791067	0.281646	0.162344		-0.0360893	0.060669	0.027252	0.051199
838	-0.286659	0.313115	-0.206214	0.0959642	0.205242	0.0364048	-0.141664	-0.0175766	-0.0581749	0.0945425	-0.789892	0.280378	0.163874		-0.0358962	0.0606252	0.0273096	0.0502208
839	-0.286546	0.313193	-0.205915	0.0950779	0.205374	0.0365679	-0.14173	-0.0174767	-0.0588903	0.0934724	-0.788717	0.279104	0.165382		-0.0357052	0.060568	0.0273621	0.0492668
840	-0.286424	0.313269	-0.205628	0.09419	0.205511	0.0367315	-0.141803	-0.0173642	-0.0596017	0.0924246	-0.787544	0.277823	0.166867		-0.0355163	0.0604972	0.0274096	0.0483369
841	-0.286294	0.313342	-0.205353	0.0933008	0.205652	0.036896	-0.141882	-0.0172394	-0.0603093	0.0913991	-0.786372	0.276535	0.168327		-0.0353296	0.0604127	0.027452	0.0474311
842	-0.286154	0.313412	-0.205092	0.0924109	0.205798	0.0370614	-0.141967	-0.0171026	-0.0610131	0.0903962	-0.785202	0.275241	0.16976		-0.0351452	0.0603144	0.0274895	0.0465495
843	-0.286006	0.31348	-0.204842	0.0915206	0.205948	0.0372281	-0.142059	-0.0169541	-0.0617133	0.0894159	-0.784034	0.27394	0.171164		-0.034963	0.0602022	0.0275221	0.0456919
844	-0.28585	0.313546	-0.204606	0.0906306	0.206102	0.0373961	-0.142156	-0.0167944	-0.0624102	0.0884582	-0.782868	0.272632	0.172537		-0.0347831	0.0600761	0.0275499	0.0448583
845	-0.285684	0.313608	-0.204381	0.0897411	0.206261	0.0375657	-0.142257	-0.0166239	-0.0631038	0.0875233	-0.781704	0.271318	0.173878		-0.0346055	0.0599361	0.0275729	0.0440486
846	-0.28551	0.313669	-0.204169	0.0888528	0.206425	0.0377372	-0.142364	-0.0164429	-0.0637943	0.0866111	-0.780544	0.269998	0.175184		-0.0344303	0.0597819	0.0275912	0.0432627
847	-0.285328	0.313726	-0.203969	0.0879661	0.206594	0.0379106	-0.142474	-0.0162519	-0.0644819	0.0857216	-0.779386	0.268671	0.176454		-0.0342575	0.0596137	0.0276049	0.0425005
848	-0.285137	0.313781	-0.203782	0.0870814	0.206768	0.0380862	-0.142589	-0.0160513	-0.0651668	0.084855	-0.778231	0.267337	0.177687		-0.034087	0.0594314	0.027614	0.0417618
849	-0.284937	0.313833	-0.203606	0.0861992	0.206947	0.0382642	-0.142707	-0.0158415	-0.0658491	0.0840111	-0.777079	0.265997	0.17888		-0.0339188	0.059235	0.0276186	0.0410464
850	-0.284729	0.313883	-0.203443	0.0853201	0.207131	0.0384448	-0.142828	-0.0156229	-0.066529	0.0831901	-0.77593	0.26465	0.180033		-0.0337529	0.0590245	0.0276188	0.0403542
851	-0.284513	0.31393	-0.203291	0.0844446	0.207321	0.0386282	-0.142951	-0.0153961	-0.0672066	0.0823918	-0.774784	0.263297	0.181143		-0.0335892	0.0587999	0.0276147	0.039685
852	-0.284288	0.313974	-0.203151	0.083573	0.207516	0.0388145	-0.143077	-0.0151614	-0.0678823	0.0816162	-0.773642	0.261938	0.182208		-0.0334277	0.0585614	0.0276063	0.0390386
853	-0.284055	0.314015	-0.203022	0.0827059	0.207717	0.039004	-0.143204	-0.0149194	-0.0685561	0.0808634	-0.772502	0.260572	0.183229		-0.0332683	0.0583089	0.0275937	0.0384147
854	-0.283815	0.314054	-0.202905	0.0818437	0.207923	0.0391968	-0.143333	-0.0146705	-0.0692283	0.0801332	-0.771366	0.259199	0.184202		-0.0331109	0.0580426	0.0275771	0.0378132
855	-0.283567	0.31409	-0.202799	0.0809871	0.208135	0.0393931	-0.143462	-0.0144153	-0.069899	0.0794257	-0.770232	0.25782	0.185127		-0.0329554	0.0577624	0.0275564	0.037234
856	-0.283311	0.314123	-0.202704	0.0801363	0.208354	0.0395931	-0.143592	-0.0141541	-0.0705683	0.0787406	-0.769101	0.256435	0.186003		-0.0328018	0.0574686	0.0275318	0.0366768
857	-0.283048	0.314153	-0.20262	0.0792919	0.208578	0.039797	-0.143722	-0.0138876	-0.0712366	0.078078	-0.767973	0.255043	0.186828		-0.0326499	0.0571613	0.0275035	0.0361415
858	-0.282778	0.31418	-0.202547	0.0784544	0.208809	0.040005	-0.143851	-0.0136161	-0.0719039	0.0774378	-0.766847	0.253645	0.187601		-0.0324997	0.0568406	0.0274714	0.035628
859	-0.282501	0.314205	-0.202484	0.0776243	0.209047	0.0402171	-0.14398	-0.0133403	-0.0725705	0.0768199	-0.765724	0.25224	0.18832		-0.0323509	0.0565066	0.0274357	0.0351363
860	-0.282217	0.314227	-0.202432	0.0768018	0.209291	0.0404337	-0.144108	-0.0130605	-0.0732366	0.0762241	-0.764603	0.250829	0.188986		-0.0322036	0.0561596	0.0273965	0.0346662
861	-0.281927	0.314246	-0.202389	0.0759876	0.209542	0.0406547	-0.144233	-0.0127774	-0.0739022	0.0756504	-0.763483	0.249412	0.189596		-0.0320575	0.0557997	0.0273539	0.0342176
862	-0.281631	0.314262	-0.202357	0.075182	0.2098	0.0408804	-0.144357	-0.0124915	-0.0745677	0.0750986	-0.762365	0.247988	0.190149		-0.0319125	0.0554272	0.027308	0.0337904
863	-0.281328	0.314275	-0.202334	0.0743855	0.210065	0.0411109	-0.144478	-0.0122032	-0.0752332	0.0745687	-0.761248	0.246558	0.190645		-0.0317686	0.0550423	0.027259	0.0333846
864	-0.281021	0.314285	-0.202321	0.0735985	0.210337	0.0413463	-0.144596	-0.011913	-0.0758988	0.0740605	-0.760131	0.245121	0.191082		-0.0316256	0.0546452	0.027207	0.0330001
865	-0.280707	0.314293	-0.202317	0.0728213	0.210616	0.0415868	-0.144711	-0.0116216	-0.0765649	0.0735739	-0.759015	0.243679	0.19146		-0.0314833	0.0542363	0.0271521	0.0326367
866	-0.280389	0.314297	-0.202321	0.0720544	0.210903	0.0418323	-0.144823	-0.0113294	-0.0772314	0.0731087	-0.757899	0.24223	0.191778		-0.0313416	0.0538158	0.0270944	0.0322945
867	-0.280067	0.314299	-0.202335	0.0712982	0.211197	0.042083	-0.14493	-0.0110368	-0.0778988	0.0726648	-0.756782	0.240776	0.192035		-0.0312004	0.053384	0.027034	0.0319733
868	-0.279739	0.314298	-0.202357	0.070553	0.211499	0.0423389	-0.145033	-0.0107446	-0.078567	0.072242	-0.755664	0.239315	0.192229		-0.0310596	0.0529413	0.0269711	0.0316733
869	-0.279408	0.314294	-0.202387	0.0698191	0.211808	0.0426002	-0.145131	-0.010453	-0.0792364	0.0718402	-0.754544	0.237848	0.192362		-0.030919	0.0524881	0.0269058	0.0313944
870	-0.279073	0.314287	-0.202425	0.069097	0.212125	0.0428668	-0.145224	-0.0101627	-0.079907	0.0714592	-0.753423	0.236376	0.19243		-0.0307786	0.0520246	0.0268381	0.0311367
871	-0.278735	0.314277	-0.202471	0.068387	0.21245	0.0431387	-0.145312	-0.00987406	-0.0805791	0.0710988	-0.752298	0.234898	0.192435		-0.0306381	0.0515513	0.0267683	0.0309004
872	-0.278394	0.314264	-0.202524	0.0676893	0.212783	0.0434161	-0.145394	-0.00958769	-0.0812529	0.0707589	-0.751171	0.233414	0.192375		-0.0304975	0.0510686	0.0266964	0.0306855
873	-0.27805	0.314248	-0.202585	0.0670044	0.213123	0.0436988	-0.145469	-0.00930403	-0.0819285	0.0704392	-0.750039	0.231924	0.19225		-0.0303566	0.050577	0.0266226	0.0304923
874	-0.277704	0.31423	-0.202652	0.0663324	0.213471	0.0439869	-0.145539	-0.00902357	-0.0826061	0.0701396	-0.748903	0.23043	0.192059		-0.0302154	0.0500768	0.0265469	0.030321
875	-0.277356	0.314208	-0.202726	0.0656738	0.213827	0.0442803	-0.145601	-0.00874677	-0.0832859	0.0698599	-0.747762	0.22893	0.191801		-0.0300738	0.0495685	0.0264694	0.0301718
876	-0.277007	0.314184	-0.202806	0.0650287	0.21419	0.044579	-0.145657	-0.00847411	-0.0839681	0.0695999	-0.746615	0.227425	0.191477		-0.0299317	0.0490527	0.0263903	0.0300451
877	-0.276657	0.314157	-0.202892	0.0643975	0.214562	0.0448829	-0.145705	-0.00820604	-0.0846528	0.0693594	-0.745461	0.225916	0.191085		-0.029789	0.0485298	0.0263097	0.029941
878	-0.276306	0.314127	-0.202984	0.0637803	0.214941	0.0451921	-0.145746	-0.00794301	-0.0853402	0.0691382	-0.7443	0.224402	0.190626		-0.0296455	0.0480003	0.0262277	0.02986
879	-0.275954	0.314094	-0.203081	0.0631776	0.215327	0.0455063	-0.145779	-0.00768545	-0.0860305	0.0689362	-0.743131	0.222884	0.190098		-0.0295014	0.0474648	0.0261444	0.0298025
880	-0.275603	0.314058	-0.203184	0.0625894	0.215721	0.0458255	-0.145804	-0.00743378	-0.0867239	0.068753	-0.741953	0.221362	0.189502		-0.0293564	0.0469238	0.0260598	0.0297689
881	-0.275253	0.314019	-0.203291	0.0620161	0.216122	0.0461496	-0.14582	-0.00718841	-0.0874205	0.0685885	-0.740766	0.219836	0.188838		-0.0292106	0.0463778	0.0259742	0.0297596
882	-0.274903	0.313977	-0.203403	0.0614578	0.216531	0.0464786	-0.145828	-0.00694975	-0.0881204	0.0684425	-0.739568	0.218307	0.188104		-0.0290639	0.0458274	0.0258875	0.0297753
883	-0.274555	0.313933	-0.203519	0.0609148	0.216946	0.0468122	-0.145826	-0.00671816	-0.0888239	0.0683147	-0.738359	0.216774	0.187302		-0.0289163	0.0452731	0.0257998	0.0298162
884	-0.274208	0.313885	-0.203639	0.0603871	0.217369	0.0471505	-0.145816	-0.00649403	-0.0895312	0.068205	-0.737138	0.215239	0.18643		-0.0287678	0.0447156	0.0257113	0.0298831
885	-0.273864	0.313834	-0.203762	0.0598751	0.217798	0.0474931	-0.145797	-0.00627771	-0.0902423	0.0681131	-0.735905	0.213701	0.185489		-0.0286184	0.0441554	0.025622	0.0299764
886	-0.273522	0.31378	-0.203889	0.0593788	0.218234	0.0478401	-0.145767	-0.00606951	-0.0909575	0.0680388	-0.734658	0.212161	0.184479		-0.0284681	0.0435931	0.025532	0.0300965
887	-0.273184	0.313723	-0.204019	0.0588984	0.218676	0.0481913	-0.145729	-0.00586976	-0.0916769	0.0679818	-0.733397	0.21062	0.183399		-0.0283169	0.0430293	0.0254414	0.0302442
888	-0.272848	0.313663	-0.204152	0.058434	0.219124	0.0485464	-0.14568	-0.00567875	-0.0924007	0.067942	-0.732121	0.209077	0.18225		-0.0281648	0.0424645	0.0253502	0.0304198
889	-0.272517	0.313599	-0.204287	0.0579857	0.219578	0.0489054	-0.145621	-0.00549676	-0.093129	0.0679191	-0.730829	0.207533	0.181031		-0.028012	0.0418994	0.0252585	0.030624
890	-0.272189	0.313532	-0.204424	0.0575538	0.220037	0.0492681	-0.145552	-0.00532404	-0.0938619	0.0679129	-0.72952	0.205988	0.179742		-0.0278584	0.0413346	0.0251663	0.0308574
891	-0.271867	0.313462	-0.204563	0.0571381	0.220502	0.0496343	-0.145473	-0.00516085	-0.0945997	0.0679231	-0.728195	0.204444	0.178384		-0.0277041	0.0407706	0.0250738	0.0311205
892	-0.271549	0.313389	-0.204703	0.0567389	0.220972	0.0500038	-0.145382	-0.00500739	-0.0953424	0.0679496	-0.726851	0.202899	0.176957		-0.0275493	0.040208	0.0249808	0.031414
893	-0.271236	0.313312	-0.204845	0.0563562	0.221446	0.0503765	-0.145281	-0.00486387	-0.0960902	0.0679921	-0.725489	0.201355	0.175461		-0.0273939	0.0396475	0.0248876	0.0317383
894	-0.27093	0.313231	-0.204988	0.0559899	0.221924	0.050752	-0.145169	-0.00473048	-0.0968431	0.0680504	-0.724107	0.199813	0.173895		-0.0272382	0.0390896	0.0247941	0.0320941
895	-0.270629	0.313147	-0.205131	0.0556403	0.222407	0.0511303	-0.145047	-0.00460739	-0.0976014	0.0681243	-0.722705	0.198272	0.172261		-0.0270822	0.0385349	0.0247004	0.0324818
896	-0.270335	0.31306	-0.205274	0.0553072	0.222893	0.0515111	-0.144912	-0.00449475	-0.098365	0.0682135	-0.721283	0.196733	0.170557		-0.026926	0.0379839	0.0246066	0.0329019
897	-0.270048	0.312968	-0.205418	0.0549907	0.223382	0.0518943	-0.144767	-0.0043927	-0.0991342	0.0683179	-0.719839	0.195197	0.168786		-0.0267697	0.0374374	0.0245126	0.0333549
898	-0.269767	0.312873	-0.205561	0.0546908	0.223874	0.0522796	-0.14461	-0.00430135	-0.0999089	0.0684371	-0.718374	0.193664	0.166946		-0.0266136	0.0368957	0.0244186	0.0338412
899	-0.269495	0.312774	-0.205704	0.0544075	0.224368	0.0526668	-0.144442	-0.00422081	-0.100689	0.068571	-0.716886	0.192135	0.165038		-0.0264577	0.0363594	0.0243245	0.0343611
900	-0.26923	0.312671	-0.205846	0.0541408	0.224864	0.0530557	-0.144263	-0.00415117	-0.101475	0.0687193	-0.715375	0.19061	0.163063		-0.0263023	0.0358292	0.0242304	0.0349151
901	-0.268973	0.312564	-0.205987	0.0538905	0.225362	0.0534461	-0.144071	-0.00409249	-0.102267	0.0688818	-0.713842	0.189089	0.16102		-0.0261473	0.0353054	0.0241364	0.0355035
902	-0.268724	0.312453	-0.206126	0.0536568	0.22586	0.0538378	-0.143869	-0.00404482	-0.103065	0.0690582	-0.712284	0.187574	0.158911		-0.0259932	0.0347886	0.0240424	0.0361265
903	-0.268484	0.312337	-0.206264	0.0534394	0.226359	0.0542305	-0.143654	-0.0040082	-0.103869	0.0692483	-0.710703	0.186064	0.156735		-0.0258399	0.0342792	0.0239485	0.0367845
904	-0.268253	0.312218	-0.2064	0.0532383	0.226859	0.0546241	-0.143428	-0.00398264	-0.104679	0.0694518	-0.709097	0.18456	0.154494		-0.0256877	0.0337779	0.0238546	0.0374775
905	-0.26803	0.312094	-0.206533	0.0530535	0.227357	0.0550184	-0.143191	-0.00396813	-0.105494	0.0696686	-0.707467	0.183063	0.152187		-0.0255368	0.0332849	0.0237609	0.0382059
906	-0.267818	0.311966	-0.206664	0.0528847	0.227855	0.0554131	-0.142942	-0.00396466	-0.106316	0.0698983	-0.705812	0.181574	0.149815		-0.0253875	0.0328009	0.0236673	0.0389696
907	-0.267614	0.311834	-0.206791	0.052732	0.228352	0.055808	-0.142681	-0.00397218	-0.107143	0.0701407	-0.704131	0.180092	0.147379		-0.0252399	0.0323262	0.0235738	0.0397687
908	-0.267421	0.311697	-0.206916	0.0525951	0.228847	0.0562028	-0.142409	-0.00399065	-0.107977	0.0703956	-0.702426	0.178618	0.14488		-0.0250942	0.0318613	0.0234805	0.0406033
909	-0.267237	0.311556	-0.207037	0.0524739	0.22934	0.0565975	-0.142125	-0.00401997	-0.108816	0.0706627	-0.700695	0.177152	0.142319		-0.0249507	0.0314066	0.0233872	0.0414734
910	-0.267063	0.31141	-0.207155	0.0523683	0.229829	0.0569917	-0.14183	-0.00406007	-0.109661	0.0709417	-0.698939	0.175696	0.139695		-0.0248095	0.0309625	0.023294	0.042379
911	-0.2669	0.31126	-0.207268	0.0522779	0.230316	0.0573852	-0.141523	-0.00411085	-0.110513	0.0712324	-0.697158	0.17425	0.137011		-0.024671	0.0305294	0.023201	0.04332
912	-0.266747	0.311105	-0.207377	0.0522028	0.230799	0.0577777	-0.141206	-0.00417216	-0.11137	0.0715346	-0.695351	0.172813	0.134267		-0.0245353	0.0301076	0.023108	0.0442964
913	-0.266604	0.310945	-0.207482	0.0521425	0.231277	0.0581692	-0.140877	-0.00424388	-0.112232	0.0718479	-0.693519	0.171388	0.131464		-0.0244026	0.0296976	0.023015	0.045308
914	-0.266472	0.31078	-0.207582	0.0520969	0.231751	0.0585593	-0.140537	-0.00432586	-0.113101	0.0721722	-0.691662	0.169973	0.128603		-0.0242732	0.0292995	0.022922	0.0463547
915	-0.266351	0.310611	-0.207677	0.0520658	0.23222	0.0589479	-0.140186	-0.00441791	-0.113975	0.0725071	-0.68978	0.168569	0.125686		-0.0241473	0.0289139	0.0228291	0.0474363
916	-0.266241	0.310436	-0.207766	0.0520488	0.232683	0.0593347	-0.139825	-0.00451986	-0.114855	0.0728523	-0.687872	0.167178	0.122713		-0.0240251	0.0285408	0.022736	0.0485527
917	-0.266141	0.310257	-0.20785	0.0520457	0.233141	0.0597194	-0.139453	-0.00463151	-0.11574	0.0732077	-0.68594	0.165799	0.119686		-0.0239069	0.0281807	0.0226429	0.0497036
918	-0.266053	0.310072	-0.207928	0.0520561	0.233591	0.060102	-0.139071	-0.00475265	-0.11663	0.0735729	-0.683984	0.164432	0.116605		-0.0237927	0.0278337	0.0225496	0.0508889
919	-0.265975	0.309883	-0.208001	0.0520799	0.234035	0.0604821	-0.138678	-0.00488305	-0.117526	0.0739477	-0.682003	0.163079	0.113473		-0.023683	0.0275002	0.0224561	0.0521083
920	-0.265909	0.309688	-0.208066	0.0521166	0.234472	0.0608596	-0.138275	-0.00502248	-0.118426	0.0743318	-0.679998	0.161739	0.110289		-0.0235778	0.0271803	0.0223625	0.0533615
921	-0.265853	0.309488	-0.208126	0.0521658	0.234901	0.0612341	-0.137863	-0.00517067	-0.119332	0.0747249	-0.677969	0.160413	0.107057		-0.0234774	0.0268743	0.0222685	0.0546484
922	-0.265809	0.309283	-0.208179	0.0522274	0.235322	0.0616056	-0.137441	-0.00532739	-0.120242	0.0751268	-0.675917	0.159101	0.103776		-0.023382	0.0265822	0.0221742	0.0559686
923	-0.265775	0.309073	-0.208224	0.0523009	0.235735	0.0619738	-0.137009	-0.00549234	-0.121157	0.0755372	-0.673842	0.157804	0.100449		-0.0232917	0.0263044	0.0220796	0.0573219
924	-0.265753	0.308858	-0.208263	0.0523859	0.236139	0.0623385	-0.136569	-0.00566527	-0.122075	0.0759558	-0.671744	0.156522	0.0970755		-0.0232068	0.0260408	0.0219846	0.0587079
925	-0.265742	0.308637	-0.208294	0.052482	0.236534	0.0626994	-0.136119	-0.00584588	-0.122998	0.0763825	-0.669624	0.155254	0.0936583		-0.0231274	0.0257918	0.0218892	0.0601263
926	-0.265741	0.308411	-0.208318	0.052589	0.23692	0.0630563	-0.135661	-0.00603389	-0.123925	0.0768168	-0.667481	0.154003	0.0901983		-0.0230537	0.0255572	0.0217932	0.0615768
927	-0.265752	0.30818	-0.208333	0.0527063	0.237297	0.0634091	-0.135195	-0.00622901	-0.124855	0.0772586	-0.665317	0.152767	0.0866969		-0.0229859	0.0253374	0.0216968	0.0630591
928	-0.265773	0.307943	-0.208341	0.0528335	0.237663	0.0637576	-0.134721	-0.00643094	-0.125789	0.0777077	-0.663132	0.151547	0.0831554		-0.022924	0.0251322	0.0215997	0.0645725
929	-0.265805	0.307701	-0.20834	0.0529703	0.23802	0.0641015	-0.134239	-0.00663937	-0.126726	0.0781638	-0.660926	0.150344	0.0795753		-0.0228683	0.0249417	0.0215021	0.0661168
930	-0.265848	0.307454	-0.208331	0.0531162	0.238366	0.0644406	-0.133749	-0.006854	-0.127665	0.0786266	-0.6587	0.149156	0.075958		-0.0228188	0.0247661	0.0214038	0.0676915
931	-0.265902	0.307202	-0.208314	0.0532708	0.238701	0.0647748	-0.133253	-0.00707452	-0.128607	0.079096	-0.656454	0.147986	0.0723049		-0.0227757	0.0246052	0.0213048	0.0692961
932	-0.265966	0.306945	-0.208287	0.0534336	0.239026	0.0651039	-0.13275	-0.00730062	-0.129551	0.0795717	-0.654189	0.146833	0.0686176		-0.022739	0.024459	0.0212051	0.0709301
933	-0.26604	0.306682	-0.208252	0.0536041	0.23934	0.0654277	-0.13224	-0.00753197	-0.130497	0.0800535	-0.651905	0.145696	0.0648976		-0.0227089	0.0243275	0.0211045	0.072593
934	-0.266125	0.306414	-0.208207	0.0537818	0.239644	0.065746	-0.131724	-0.00776826	-0.131444	0.0805413	-0.649603	0.144577	0.0611464		-0.0226855	0.0242106	0.0210031	0.0742844
935	-0.26622	0.306141	-0.208153	0.0539663	0.239935	0.0660587	-0.131203	-0.00800915	-0.132393	0.0810347	-0.647283	0.143475	0.0573656		-0.0226688	0.0241082	0.0209009	0.0760038
936	-0.266325	0.305863	-0.208089	0.0541572	0.240216	0.0663657	-0.130677	-0.00825431	-0.133342	0.0815336	-0.644946	0.142391	0.0535569		-0.0226589	0.0240202	0.0207976	0.0777507
937	-0.26644	0.30558	-0.208016	0.0543538	0.240485	0.0666667	-0.130145	-0.0085034	-0.134292	0.0820379	-0.642592	0.141324	0.0497221		-0.0226558	0.0239464	0.0206933	0.0795246
938	-0.266565	0.305293	-0.207933	0.0545557	0.240743	0.0669617	-0.129609	-0.00875608	-0.135243	0.0825473	-0.640223	0.140274	0.0458628		-0.0226596	0.0238868	0.020588	0.0813251
939	-0.266699	0.305	-0.20784	0.0547624	0.24099	0.0672506	-0.129069	-0.00901201	-0.136193	0.0830617	-0.637838	0.139243	0.0419809		-0.0226703	0.023841	0.0204815	0.0831517
940	-0.266843	0.304703	-0.207737	0.0549734	0.241225	0.0675331	-0.128525	-0.00927083	-0.137142	0.083581	-0.635437	0.138229	0.0380782		-0.0226879	0.0238089	0.0203737	0.0850041
941	-0.266996	0.304401	-0.207623	0.0551881	0.241448	0.0678093	-0.127977	-0.0095322	-0.138091	0.0841048	-0.633023	0.137232	0.0341566		-0.0227124	0.0237902	0.0202646	0.0868819
942	-0.267159	0.304094	-0.207499	0.0554062	0.24166	0.068079	-0.127427	-0.00979576	-0.139039	0.0846332	-0.630595	0.136253	0.0302181		-0.0227438	0.0237848	0.0201541	0.0887847
943	-0.26733	0.303784	-0.207365	0.0556271	0.24186	0.0683422	-0.126874	-0.0100612	-0.139985	0.0851659	-0.628153	0.135292	0.0262646		-0.0227821	0.0237923	0.0200421	0.0907121
944	-0.26751	0.303468	-0.207221	0.0558502	0.242049	0.0685987	-0.126318	-0.010328	-0.14093	0.0857027	-0.625699	0.134348	0.0222982		-0.0228273	0.0238124	0.0199285	0.0926638
945	-0.267698	0.303149	-0.207065	0.0560751	0.242226	0.0688486	-0.125762	-0.010596	-0.141872	0.0862436	-0.623233	0.133421	0.0183209		-0.0228792	0.023845	0.0198133	0.0946395
946	-0.267896	0.302826	-0.206899	0.0563012	0.242392	0.0690917	-0.125203	-0.0108648	-0.142812	0.0867883	-0.620756	0.132512	0.014335		-0.0229379	0.0238897	0.0196962	0.0966389
947	-0.268101	0.302499	-0.206723	0.0565281	0.242547	0.069328	-0.124644	-0.0111339	-0.143748	0.0873367	-0.618268	0.13162	0.0103426		-0.0230032	0.0239462	0.0195772	0.0986617
948	-0.268314	0.302168	-0.206535	0.0567551	0.24269	0.0695575	-0.124085	-0.0114032	-0.144681	0.0878886	-0.615769	0.130744	0.00634587		-0.023075	0.0240143	0.0194563	0.100708
949	-0.268535	0.301833	-0.206337	0.0569818	0.242822	0.0697801	-0.123525	-0.0116721	-0.145611	0.0884439	-0.613262	0.129886	0.00234713		-0.0231533	0.0240936	0.0193331	0.102776
950	-0.268764	0.301495	-0.206128	0.0572076	0.242943	0.0699957	-0.122966	-0.0119403	-0.146536	0.0890024	-0.610745	0.129044	-0.00165139		-0.0232379	0.0241839	0.0192078	0.104868
951	-0.269	0.301154	-0.205909	0.057432	0.243052	0.0702045	-0.122407	-0.0122076	-0.147457	0.089564	-0.60822	0.128218	-0.00564744		-0.0233286	0.0242849	0.0190801	0.106981
952	-0.269244	0.300809	-0.205678	0.0576546	0.243151	0.0704063	-0.12185	-0.0124735	-0.148374	0.0901285	-0.605688	0.127409	-0.00963876		-0.0234252	0.0243961	0.0189499	0.109117
953	-0.269494	0.300462	-0.205437	0.0578747	0.243239	0.0706012	-0.121295	-0.0127378	-0.149285	0.0906958	-0.603149	0.126616	-0.0136231		-0.0235277	0.0245174	0.0188171	0.111275
954	-0.269752	0.300112	-0.205185	0.058092	0.243317	0.070789	-0.120741	-0.013	-0.15019	0.0912657	-0.600604	0.125838	-0.0175982		-0.0236358	0.0246483	0.0186816	0.113454
955	-0.270016	0.299759	-0.204923	0.0583059	0.243383	0.0709699	-0.12019	-0.0132599	-0.151089	0.0918381	-0.598053	0.125076	-0.0215619		-0.0237494	0.0247886	0.0185433	0.115654
956	-0.270287	0.299404	-0.204649	0.0585159	0.24344	0.0711437	-0.119643	-0.0135172	-0.151982	0.0924128	-0.595498	0.124329	-0.025512		-0.0238681	0.0249377	0.018402	0.117875
957	-0.270563	0.299047	-0.204365	0.0587215	0.243486	0.0713106	-0.119098	-0.0137715	-0.152869	0.0929898	-0.592938	0.123597	-0.0294463		-0.0239918	0.0250954	0.0182576	0.120116
958	-0.270846	0.298688	-0.204071	0.0589223	0.243522	0.0714704	-0.118557	-0.0140225	-0.153748	0.0935688	-0.590376	0.12288	-0.0333625		-0.0241202	0.0252612	0.01811	0.122377
959	-0.271135	0.298327	-0.203765	0.0591178	0.243549	0.0716233	-0.11802	-0.0142699	-0.15462	0.0941497	-0.587811	0.122177	-0.0372586		-0.0242532	0.0254347	0.017959	0.124658
960	-0.271429	0.297964	-0.20345	0.0593075	0.243566	0.0717691	-0.117488	-0.0145135	-0.155484	0.0947325	-0.585243	0.121488	-0.0411324		-0.0243904	0.0256156	0.0178046	0.126957
961	-0.271729	0.2976	-0.203124	0.0594909	0.243573	0.071908	-0.116961	-0.0147529	-0.156339	0.0953169	-0.582675	0.120813	-0.0449819		-0.0245316	0.0258035	0.0176467	0.129275
962	-0.272034	0.297236	-0.202787	0.0596677	0.243571	0.0720399	-0.116439	-0.0149879	-0.157187	0.0959029	-0.580106	0.120151	-0.0488048		-0.0246766	0.0259978	0.017485	0.131611
963	-0.272344	0.29687	-0.202441	0.0598374	0.24356	0.0721648	-0.115923	-0.0152181	-0.158025	0.0964902	-0.577538	0.119502	-0.0525992		-0.024825	0.0261983	0.0173194	0.133965
964	-0.272659	0.296504	-0.202084	0.0599996	0.243541	0.0722827	-0.115412	-0.0154432	-0.158854	0.0970789	-0.57497	0.118866	-0.0563631		-0.0249767	0.0264044	0.01715	0.136335
965	-0.272978	0.296137	-0.201717	0.0601538	0.243512	0.0723937	-0.114908	-0.0156631	-0.159673	0.0976688	-0.572404	0.118242	-0.0600944		-0.0251314	0.0266157	0.0169765	0.138721
966	-0.273302	0.29577	-0.201341	0.0602997	0.243476	0.0724979	-0.114411	-0.0158774	-0.160482	0.0982597	-0.569839	0.11763	-0.0637912		-0.0252887	0.0268318	0.0167988	0.141124
967	-0.27363	0.295404	-0.200954	0.060437	0.243431	0.0725951	-0.113921	-0.0160859	-0.161281	0.0988516	-0.567278	0.117029	-0.0674516		-0.0254485	0.0270523	0.0166169	0.143542
968	-0.273961	0.295037	-0.200558	0.0605652	0.243379	0.0726855	-0.113437	-0.0162883	-0.162069	0.0994443	-0.56472	0.11644	-0.0710737		-0.0256104	0.0272766	0.0164306	0.145974
969	-0.274296	0.294672	-0.200152	0.060684	0.243319	0.0727692	-0.112962	-0.0164844	-0.162846	0.100038	-0.562166	0.115861	-0.0746556		-0.0257743	0.0275044	0.0162398	0.14842
970	-0.274634	0.294307	-0.199736	0.0607931	0.243252	0.0728461	-0.112494	-0.016674	-0.163612	0.100632	-0.559617	0.115292	-0.0781955		-0.0259398	0.0277352	0.0160444	0.15088
971	-0.274976	0.293943	-0.199311	0.0608921	0.243177	0.0729163	-0.112034	-0.0168567	-0.164366	0.101226	-0.557073	0.114734	-0.0816917		-0.0261068	0.0279685	0.0158444	0.153353
972	-0.27532	0.29358	-0.198877	0.0609809	0.243096	0.0729799	-0.111582	-0.0170323	-0.165108	0.101821	-0.554535	0.114184	-0.0851424		-0.0262749	0.0282038	0.0156396	0.155838
973	-0.275666	0.293219	-0.198433	0.061059	0.243008	0.0730369	-0.111139	-0.0172008	-0.165838	0.102417	-0.552004	0.113644	-0.0885457		-0.0264439	0.0284408	0.01543	0.158334
974	-0.276015	0.29286	-0.197981	0.0611262	0.242913	0.0730875	-0.110705	-0.0173617	-0.166556	0.103012	-0.54948	0.113112	-0.0919001		-0.0266136	0.028679	0.0152154	0.160841
975	-0.276365	0.292502	-0.197519	0.0611822	0.242813	0.0731317	-0.11028	-0.017515	-0.167261	0.103608	-0.546963	0.112588	-0.0952039		-0.0267838	0.0289179	0.0149959	0.163358
976	-0.276717	0.292147	-0.197049	0.0612269	0.242706	0.0731695	-0.109864	-0.0176604	-0.167952	0.104204	-0.544455	0.112071	-0.0984555		-0.0269543	0.0291571	0.0147712	0.165884
977	-0.27707	0.291794	-0.19657	0.0612599	0.242594	0.0732012	-0.109457	-0.0177977	-0.168631	0.1048	-0.541956	0.111562	-0.101654		-0.0271248	0.0293961	0.0145414	0.168419
978	-0.277423	0.291444	-0.196083	0.061281	0.242476	0.0732267	-0.10906	-0.0179268	-0.169296	0.105396	-0.539467	0.111059	-0.104796		-0.0272952	0.0296345	0.0143064	0.170963
979	-0.277777	0.291096	-0.195587	0.0612902	0.242353	0.0732462	-0.108673	-0.0180475	-0.169947	0.105992	-0.536988	0.110563	-0.107883		-0.0274652	0.0298719	0.0140662	0.173513
980	-0.278131	0.290751	-0.195084	0.0612871	0.242225	0.0732597	-0.108295	-0.0181597	-0.170584	0.106587	-0.534519	0.110072	-0.110911		-0.0276348	0.0301078	0.0138205	0.17607
981	-0.278485	0.29041	-0.194572	0.0612716	0.242093	0.0732674	-0.107927	-0.0182632	-0.171207	0.107182	-0.532062	0.109586	-0.113881		-0.0278037	0.0303417	0.0135695	0.178634
982	-0.278837	0.290071	-0.194052	0.0612436	0.241956	0.0732694	-0.10757	-0.0183578	-0.171815	0.107777	-0.529617	0.109105	-0.11679		-0.0279718	0.0305732	0.0133131	0.181203
983	-0.279189	0.289737	-0.193525	0.061203	0.241814	0.0732658	-0.107222	-0.0184435	-0.172409	0.108371	-0.527184	0.108628	-0.119638		-0.028139	0.030802	0.0130512	0.183777
984	-0.279539	0.289406	-0.19299	0.0611496	0.241669	0.0732566	-0.106885	-0.0185202	-0.172988	0.108964	-0.524765	0.108154	-0.122424		-0.0283051	0.0310275	0.0127837	0.186356
985	-0.279887	0.289079	-0.192447	0.0610835	0.241519	0.0732421	-0.106558	-0.0185878	-0.173552	0.109557	-0.522358	0.107684	-0.125146		-0.0284701	0.0312494	0.0125108	0.188938
986	-0.280233	0.288756	-0.191897	0.0610044	0.241367	0.0732223	-0.106242	-0.0186461	-0.1741	0.110149	-0.519966	0.107216	-0.127804		-0.028634	0.0314672	0.0122322	0.191525
987	-0.280577	0.288437	-0.19134	0.0609123	0.241211	0.0731972	-0.105936	-0.0186951	-0.174634	0.110741	-0.517589	0.10675	-0.130396		-0.0287965	0.0316805	0.011948	0.194115
988	-0.280917	0.288122	-0.190776	0.0608073	0.241052	0.0731671	-0.105641	-0.0187347	-0.175151	0.111331	-0.515227	0.106286	-0.132923		-0.0289576	0.031889	0.0116582	0.196708
989	-0.281254	0.287812	-0.190205	0.0606894	0.24089	0.073132	-0.105356	-0.018765	-0.175653	0.111921	-0.51288	0.105823	-0.135384		-0.0291174	0.0320921	0.0113628	0.199304
990	-0.281587	0.287507	-0.189626	0.0605584	0.240726	0.073092	-0.105081	-0.0187859	-0.176139	0.112509	-0.510549	0.105361	-0.137778		-0.0292757	0.0322896	0.0110617	0.201901
991	-0.281916	0.287207	-0.189041	0.0604146	0.240559	0.0730473	-0.104817	-0.0187973	-0.176609	0.113096	-0.508235	0.104898	-0.140104		-0.0294326	0.0324811	0.0107549	0.204501
992	-0.282241	0.286912	-0.188449	0.0602579	0.240391	0.0729978	-0.104564	-0.0187992	-0.177063	0.113682	-0.505937	0.104436	-0.142362		-0.029588	0.0326661	0.0104424	0.207103
993	-0.28256	0.286622	-0.187851	0.0600884	0.240221	0.0729436	-0.104321	-0.0187918	-0.1775	0.114267	-0.503657	0.103973	-0.144553		-0.0297419	0.0328444	0.0101242	0.209706
994	-0.282874	0.286337	-0.187246	0.0599062	0.24005	0.0728849	-0.104088	-0.0187749	-0.17792	0.11485	-0.501395	0.103508	-0.146675		-0.0298943	0.0330154	0.00980024	0.21231
995	-0.283183	0.286058	-0.186634	0.0597114	0.239877	0.0728218	-0.103865	-0.0187487	-0.178324	0.115432	-0.499151	0.103042	-0.148729		-0.0300452	0.033179	0.00947061	0.214916
996	-0.283485	0.285784	-0.186016	0.0595041	0.239704	0.0727542	-0.103653	-0.0187132	-0.178711	0.116012	-0.496926	0.102574	-0.150715		-0.0301947	0.0333348	0.00913529	0.217523
997	-0.283781	0.285516	-0.185391	0.0592845	0.239531	0.0726823	-0.10345	-0.0186685	-0.17908	0.116591	-0.49472	0.102103	-0.152632		-0.0303427	0.0334824	0.00879429	0.22013
998	-0.28407	0.285253	-0.18476	0.0590527	0.239357	0.072606	-0.103257	-0.0186146	-0.179433	0.117167	-0.492533	0.101629	-0.154482		-0.0304893	0.0336215	0.00844762	0.222739
999	-0.284352	0.284996	-0.184122	0.0588089	0.239183	0.0725256	-0.103075	-0.0185517	-0.179768	0.117742	-0.490367	0.101152	-0.156264		-0.0306345	0.0337517	0.00809531	0.225349
1000	-0.284626	0.284746	-0.183479	0.0585534	0.23901	0.072441	-0.102901	-0.0184798	-0.180086	0.118315	-0.48822	0.100671	-0.157979		-0.0307785	0.0338729	0.00773739	0.227961
1001	-0.284892	0.284501	-0.182829	0.0582863	0.238837	0.0723522	-0.102738	-0.0183991	-0.180386	0.118885	-0.486095	0.100185	-0.159628		-0.0309212	0.0339847	0.0073739	0.230574
1002	-0.28515	0.284263	-0.182172	0.0580079	0.238665	0.0722595	-0.102583	-0.0183096	-0.180668	0.119454	-0.483991	0.0996956	-0.16121		-0.0310628	0.0340867	0.00700487	0.233189
1003	-0.2854	0.28403	-0.181509	0.0577184	0.238495	0.0721627	-0.102438	-0.0182116	-0.180933	0.120019	-0.481909	0.099201	-0.162728		-0.0312032	0.0341789	0.00663035	0.235807
1004	-0.28564	0.283804	-0.18084	0.0574181	0.238326	0.0720621	-0.102302	-0.0181052	-0.181179	0.120583	-0.479849	0.0987011	-0.16418		-0.0313427	0.034261	0.00625039	0.238426
1005	-0.285872	0.283585	-0.180165	0.0571074	0.238158	0.0719577	-0.102174	-0.0179906	-0.181408	0.121144	-0.477812	0.0981956	-0.16557		-0.0314813	0.0343326	0.00586505	0.24105
1006	-0.286093	0.283372	-0.179484	0.0567865	0.237993	0.0718494	-0.102054	-0.0178678	-0.181618	0.121702	-0.475798	0.0976843	-0.166897		-0.031619	0.0343938	0.0054744	0.243677
1007	-0.286305	0.283165	-0.178796	0.0564558	0.237831	0.0717375	-0.101943	-0.0177372	-0.18181	0.122257	-0.473807	0.0971668	-0.168163		-0.0317561	0.0344442	0.00507851	0.246308
1008	-0.286507	0.282965	-0.178102	0.0561157	0.237671	0.071622	-0.10184	-0.0175989	-0.181984	0.122809	-0.47184	0.0966428	-0.169368		-0.0318925	0.0344837	0.00467747	0.248944
1009	-0.286698	0.282772	-0.177401	0.0557664	0.237514	0.071503	-0.101745	-0.0174531	-0.18214	0.123358	-0.469897	0.0961121	-0.170514		-0.0320285	0.0345122	0.00427138	0.251586
1010	-0.286879	0.282585	-0.176694	0.0554085	0.237361	0.0713806	-0.101657	-0.0173001	-0.182277	0.123905	-0.467979	0.0955744	-0.171602		-0.0321642	0.0345296	0.00386033	0.254234
1011	-0.287048	0.282405	-0.175981	0.0550423	0.237211	0.0712547	-0.101576	-0.0171401	-0.182396	0.124448	-0.466086	0.0950296	-0.172634		-0.0322997	0.0345357	0.00344443	0.256889
1012	-0.287206	0.282232	-0.175261	0.0546682	0.237065	0.0711257	-0.101502	-0.0169733	-0.182496	0.124988	-0.464218	0.0944774	-0.173611		-0.0324351	0.0345304	0.00302381	0.259551
1013	-0.287353	0.282065	-0.174534	0.0542866	0.236924	0.0709934	-0.101434	-0.0168001	-0.182578	0.125524	-0.462376	0.0939175	-0.174533		-0.0325706	0.0345138	0.00259859	0.262221
1014	-0.287488	0.281906	-0.173801	0.053898	0.236787	0.0708581	-0.101373	-0.0166208	-0.182641	0.126057	-0.460559	0.0933499	-0.175404		-0.0327063	0.0344857	0.00216891	0.2649
1015	-0.287611	0.281753	-0.173062	0.0535028	0.236655	0.0707198	-0.101318	-0.0164355	-0.182686	0.126586	-0.458769	0.0927743	-0.176224		-0.0328424	0.034446	0.00173491	0.267588
1016	-0.287722	0.281608	-0.172316	0.0531016	0.236529	0.0705786	-0.101268	-0.0162447	-0.182712	0.127112	-0.457006	0.0921907	-0.176994		-0.0329791	0.0343948	0.00129674	0.270285
1017	-0.287821	0.281469	-0.171563	0.0526947	0.236408	0.0704347	-0.101223	-0.0160486	-0.18272	0.127634	-0.45527	0.0915988	-0.177718		-0.0331164	0.034332	0.000854549	0.272993
1018	-0.287908	0.281337	-0.170803	0.0522827	0.236292	0.0702881	-0.101184	-0.0158476	-0.18271	0.128153	-0.45356	0.0909985	-0.178396		-0.0332544	0.0342577	0.000408502	0.275711
1019	-0.287982	0.281212	-0.170036	0.051866	0.236183	0.070139	-0.101149	-0.0156421	-0.182681	0.128667	-0.451879	0.0903897	-0.17903		-0.0333935	0.0341717	-4.12358e-05	0.27844
1020	-0.288044	0.281094	-0.169263	0.0514453	0.236081	0.0699875	-0.101118	-0.0154324	-0.182634	0.129178	-0.450224	0.0897724	-0.179622		-0.0335335	0.0340742	-0.000494496	0.28118
1021	-0.288092	0.280982	-0.168482	0.0510209	0.235985	0.0698337	-0.101091	-0.0152188	-0.182569	0.129685	-0.448598	0.0891464	-0.180175		-0.0336748	0.0339651	-0.000951103	0.283931
1022	-0.288128	0.280878	-0.167695	0.0505934	0.235897	0.0696778	-0.101068	-0.0150017	-0.182485	0.130188	-0.447	0.0885116	-0.180689		-0.0338174	0.0338446	-0.00141088	0.286693
1023	-0.288152	0.28078	-0.1669	0.0501634	0.235816	0.0695199	-0.101047	-0.0147816	-0.182383	0.130687	-0.445429	0.0878679	-0.181168		-0.0339614	0.0337127	-0.00187366	0.289466
1024	-0.288162	0.280689	-0.166099	0.0497313	0.235742	0.0693601	-0.10103	-0.0145587	-0.182264	0.131182	-0.443887	0.0872154	-0.181614		-0.0341069	0.0335694	-0.00233925	0.29225
1025	-0.28816	0.280606	-0.16529	0.0492978	0.235677	0.0691985	-0.101015	-0.0143336	-0.182127	0.131673	-0.442373	0.0865538	-0.182028		-0.034254	0.033415	-0.00280748	0.295045
1026	-0.288144	0.280528	-0.164474	0.0488633	0.235619	0.0690352	-0.101003	-0.0141065	-0.181972	0.13216	-0.440888	0.0858833	-0.182412		-0.0344029	0.0332495	-0.00327817	0.297851
1027	-0.288116	0.280458	-0.163651	0.0484284	0.235571	0.0688705	-0.100992	-0.0138779	-0.181799	0.132643	-0.439431	0.0852037	-0.18277		-0.0345537	0.033073	-0.00375114	0.300667
1028	-0.288075	0.280394	-0.162821	0.0479936	0.23553	0.0687044	-0.100982	-0.0136482	-0.181609	0.133122	-0.438002	0.0845151	-0.183102		-0.0347063	0.0328858	-0.00422621	0.303493
1029	-0.288021	0.280337	-0.161984	0.0475595	0.235499	0.068537	-0.100974	-0.0134177	-0.181402	0.133596	-0.436602	0.0838174	-0.183411		-0.0348609	0.0326879	-0.0047032	0.306329
1030	-0.287955	0.280287	-0.161139	0.0471265	0.235477	0.0683685	-0.100966	-0.013187	-0.181178	0.134067	-0.43523	0.0831106	-0.183699		-0.0350176	0.0324796	-0.00518193	0.309174
1031	-0.287876	0.280243	-0.160287	0.0466953	0.235464	0.0681989	-0.100959	-0.0129564	-0.180937	0.134533	-0.433887	0.0823947	-0.183969		-0.0351764	0.032261	-0.00566222	0.312027
1032	-0.287784	0.280206	-0.159427	0.0462664	0.23546	0.0680285	-0.100951	-0.0127263	-0.18068	0.134996	-0.432572	0.0816698	-0.184222		-0.0353373	0.0320324	-0.00614389	0.314889
1033	-0.28768	0.280175	-0.158561	0.0458403	0.235466	0.0678573	-0.100944	-0.0124971	-0.180406	0.135454	-0.431285	0.0809359	-0.184461		-0.0355005	0.031794	-0.00662676	0.317758
1034	-0.287564	0.280151	-0.157687	0.0454175	0.235481	0.0676855	-0.100935	-0.0122692	-0.180116	0.135909	-0.430026	0.080193	-0.184687		-0.035666	0.0315461	-0.00711067	0.320634
1035	-0.287436	0.280133	-0.156805	0.0449986	0.235507	0.0675132	-0.100926	-0.0120431	-0.179811	0.136359	-0.428795	0.0794413	-0.184902		-0.0358337	0.0312888	-0.00759543	0.323515
1036	-0.287295	0.280122	-0.155917	0.044584	0.235542	0.0673404	-0.100916	-0.0118191	-0.17949	0.136806	-0.427593	0.0786808	-0.185109		-0.0360038	0.0310224	-0.00808089	0.326402
1037	-0.287143	0.280117	-0.155021	0.0441744	0.235587	0.0671674	-0.100903	-0.0115976	-0.179153	0.137248	-0.426418	0.0779116	-0.185309		-0.0361762	0.0307472	-0.00856686	0.329292
1038	-0.28698	0.280118	-0.154118	0.0437701	0.235643	0.0669942	-0.100889	-0.011379	-0.178802	0.137687	-0.42527	0.0771338	-0.185504		-0.0363509	0.0304635	-0.00905319	0.332186
1039	-0.286805	0.280126	-0.153207	0.0433718	0.235708	0.0668209	-0.100873	-0.0111637	-0.178436	0.138122	-0.42415	0.0763477	-0.185695		-0.036528	0.0301716	-0.00953971	0.335082
1040	-0.28662	0.280139	-0.15229	0.0429798	0.235784	0.0666477	-0.100854	-0.0109521	-0.178055	0.138552	-0.423057	0.0755533	-0.185885		-0.0367074	0.0298717	-0.0100263	0.337979
1041	-0.286423	0.280159	-0.151365	0.0425947	0.23587	0.0664747	-0.100832	-0.0107446	-0.177661	0.138979	-0.42199	0.0747509	-0.186075		-0.0368892	0.0295643	-0.0105127	0.340875
1042	-0.286216	0.280184	-0.150434	0.042217	0.235966	0.066302	-0.100807	-0.0105415	-0.177253	0.139402	-0.420951	0.0739406	-0.186266		-0.0370732	0.0292497	-0.0109988	0.343769
1043	-0.285999	0.280215	-0.149495	0.0418472	0.236073	0.0661296	-0.100779	-0.0103431	-0.176832	0.139821	-0.419937	0.0731226	-0.18646		-0.0372595	0.0289283	-0.0114844	0.346661
1044	-0.285772	0.280253	-0.148549	0.0414857	0.236189	0.0659577	-0.100746	-0.0101499	-0.176399	0.140237	-0.418949	0.0722972	-0.186658		-0.037448	0.0286004	-0.0119695	0.349548
1045	-0.285536	0.280296	-0.147597	0.0411329	0.236316	0.0657865	-0.10071	-0.00996217	-0.175953	0.140648	-0.417987	0.0714647	-0.186861		-0.0376388	0.0282665	-0.0124537	0.352429
1046	-0.285291	0.280344	-0.146638	0.0407894	0.236453	0.0656159	-0.100669	-0.00978025	-0.175495	0.141056	-0.417051	0.0706253	-0.187071		-0.0378316	0.0279271	-0.0129371	0.355303
1047	-0.285037	0.280398	-0.145672	0.0404555	0.2366	0.065446	-0.100624	-0.00960447	-0.175025	0.141461	-0.416139	0.0697793	-0.187289		-0.0380266	0.0275826	-0.0134194	0.358169
1048	-0.284774	0.280457	-0.1447	0.0401318	0.236757	0.0652771	-0.100574	-0.00943514	-0.174545	0.141861	-0.415252	0.0689271	-0.187515		-0.0382235	0.0272334	-0.0139004	0.361024
1049	-0.284503	0.280522	-0.143721	0.0398187	0.236923	0.065109	-0.100518	-0.00927257	-0.174054	0.142258	-0.414388	0.0680689	-0.187752		-0.0384223	0.0268801	-0.0143802	0.363868
1050	-0.284225	0.280592	-0.142736	0.0395165	0.237099	0.0649419	-0.100458	-0.00911703	-0.173552	0.142651	-0.413549	0.0672052	-0.187999		-0.0386231	0.0265231	-0.0148584	0.366698
1051	-0.28394	0.280667	-0.141744	0.0392258	0.237285	0.0647759	-0.100391	-0.0089688	-0.173041	0.143041	-0.412733	0.0663362	-0.188258		-0.0388255	0.0261628	-0.0153351	0.369514
1052	-0.283648	0.280747	-0.140746	0.0389468	0.23748	0.064611	-0.100319	-0.00882815	-0.172522	0.143427	-0.411939	0.0654625	-0.18853		-0.0390297	0.0257999	-0.01581	0.372313
1053	-0.283349	0.280832	-0.139742	0.0386801	0.237685	0.0644473	-0.10024	-0.00869532	-0.171993	0.14381	-0.411168	0.0645843	-0.188815		-0.0392354	0.0254347	-0.0162831	0.375094
1054	-0.283045	0.280921	-0.138732	0.0384261	0.237898	0.0642847	-0.100155	-0.00857053	-0.171456	0.14419	-0.410419	0.063702	-0.189114		-0.0394427	0.0250677	-0.0167541	0.377856
1055	-0.282735	0.281015	-0.137715	0.038185	0.23812	0.0641234	-0.100063	-0.00845402	-0.170912	0.144566	-0.409691	0.0628162	-0.189427		-0.0396514	0.0246995	-0.0172231	0.380596
1056	-0.282421	0.281113	-0.136693	0.0379572	0.238351	0.0639633	-0.0999645	-0.00834597	-0.17036	0.144938	-0.408984	0.0619271	-0.189756		-0.0398614	0.0243305	-0.0176898	0.383313
1057	-0.282102	0.281216	-0.135665	0.0377432	0.23859	0.0638044	-0.0998586	-0.00824659	-0.169802	0.145308	-0.408297	0.0610353	-0.190101		-0.0400727	0.0239611	-0.0181542	0.386004
1058	-0.281779	0.281322	-0.134632	0.0375433	0.238837	0.0636468	-0.0997454	-0.00815605	-0.169238	0.145673	-0.40763	0.0601411	-0.190462		-0.0402851	0.023592	-0.0186161	0.388669
1059	-0.281452	0.281433	-0.133593	0.0373577	0.239093	0.0634905	-0.0996245	-0.00807449	-0.168668	0.146036	-0.406982	0.0592451	-0.19084		-0.0404986	0.0232235	-0.0190755	0.391305
1060	-0.281123	0.281547	-0.132548	0.0371868	0.239356	0.0633354	-0.0994957	-0.00800208	-0.168092	0.146395	-0.406353	0.0583475	-0.191236		-0.0407132	0.0228561	-0.0195322	0.393911
1061	-0.280791	0.281665	-0.131498	0.037031	0.239626	0.0631816	-0.0993589	-0.00793892	-0.167512	0.146751	-0.405742	0.057449	-0.191649		-0.0409286	0.0224903	-0.0199862	0.396485
1062	-0.280458	0.281787	-0.130442	0.0368904	0.239903	0.063029	-0.0992139	-0.00788514	-0.166928	0.147104	-0.405148	0.0565499	-0.192079		-0.041145	0.0221266	-0.0204374	0.399024
1063	-0.280123	0.281911	-0.129381	0.0367653	0.240187	0.0628776	-0.0990605	-0.00784082	-0.166341	0.147454	-0.404572	0.0556507	-0.192528		-0.0413621	0.0217655	-0.0208856	0.401527
1064	-0.279787	0.282039	-0.128315	0.036656	0.240478	0.0627274	-0.0988984	-0.00780605	-0.16575	0.1478	-0.404012	0.0547519	-0.192995		-0.04158	0.0214072	-0.0213308	0.403992
1065	-0.279451	0.28217	-0.127244	0.0365627	0.240774	0.0625782	-0.0987276	-0.00778087	-0.165156	0.148143	-0.403467	0.0538539	-0.193481		-0.0417986	0.0210524	-0.021773	0.406417
1066	-0.279115	0.282304	-0.126168	0.0364856	0.241077	0.0624301	-0.0985478	-0.00776534	-0.16456	0.148483	-0.402938	0.0529572	-0.193985		-0.0420178	0.0207015	-0.022212	0.408801
1067	-0.27878	0.282441	-0.125087	0.0364249	0.241385	0.062283	-0.098359	-0.00775948	-0.163962	0.148819	-0.402424	0.0520623	-0.194507		-0.0422376	0.0203548	-0.0226479	0.411141
1068	-0.278446	0.28258	-0.124001	0.0363807	0.241699	0.0621369	-0.098161	-0.0077633	-0.163363	0.149152	-0.401924	0.0511696	-0.195048		-0.0424579	0.0200128	-0.0230804	0.413435
1069	-0.278114	0.282721	-0.12291	0.0363533	0.242017	0.0619915	-0.0979537	-0.00777679	-0.162763	0.149482	-0.401438	0.0502796	-0.195607		-0.0426787	0.0196758	-0.0235097	0.415682
1070	-0.277785	0.282864	-0.121814	0.0363426	0.242339	0.0618469	-0.097737	-0.00779993	-0.162163	0.149809	-0.400965	0.0493928	-0.196184		-0.0429	0.0193444	-0.0239357	0.417879
1071	-0.277458	0.28301	-0.120714	0.0363489	0.242666	0.061703	-0.0975107	-0.0078327	-0.161563	0.150132	-0.400505	0.0485096	-0.196778		-0.0431216	0.0190187	-0.0243582	0.420026
1072	-0.277134	0.283157	-0.119609	0.0363723	0.242996	0.0615596	-0.0972749	-0.00787505	-0.160963	0.150452	-0.400057	0.0476305	-0.19739		-0.0433437	0.0186993	-0.0247773	0.42212
1073	-0.276814	0.283307	-0.1185	0.0364127	0.24333	0.0614167	-0.0970295	-0.00792691	-0.160364	0.150768	-0.399621	0.0467559	-0.198018		-0.043566	0.0183864	-0.025193	0.424159
1074	-0.276499	0.283457	-0.117386	0.0364703	0.243667	0.0612741	-0.0967745	-0.00798822	-0.159767	0.151081	-0.399197	0.0458862	-0.198663		-0.0437888	0.0180803	-0.0256053	0.426142
1075	-0.276188	0.28361	-0.116268	0.0365452	0.244006	0.0611318	-0.0965097	-0.0080589	-0.159171	0.151391	-0.398783	0.045022	-0.199323		-0.0440118	0.0177815	-0.026014	0.428067
1076	-0.275882	0.283763	-0.115145	0.0366372	0.244347	0.0609896	-0.0962353	-0.00813884	-0.158578	0.151697	-0.39838	0.0441636	-0.199997		-0.0442351	0.0174901	-0.0264193	0.429933
1077	-0.275582	0.283918	-0.114018	0.0367466	0.244691	0.0608474	-0.0959512	-0.00822794	-0.157987	0.151999	-0.397988	0.0433114	-0.200686		-0.0444586	0.0172065	-0.026821	0.431738
1078	-0.275288	0.284073	-0.112887	0.0368732	0.245035	0.0607052	-0.0956575	-0.00832606	-0.157399	0.152298	-0.397605	0.0424659	-0.201388		-0.0446824	0.016931	-0.0272193	0.43348
1079	-0.275001	0.28423	-0.111752	0.0370171	0.24538	0.0605627	-0.0953541	-0.00843308	-0.156815	0.152593	-0.397232	0.0416274	-0.202102		-0.0449063	0.0166638	-0.027614	0.435158
1080	-0.27472	0.284387	-0.110612	0.0371782	0.245726	0.0604199	-0.0950413	-0.00854885	-0.156235	0.152885	-0.396867	0.0407963	-0.202828		-0.0451305	0.0164052	-0.0280053	0.43677
1081	-0.274447	0.284544	-0.109469	0.0373564	0.246072	0.0602766	-0.094719	-0.0086732	-0.155658	0.153173	-0.396512	0.0399731	-0.203563		-0.0453548	0.0161555	-0.0283932	0.438316
1082	-0.274181	0.284703	-0.108321	0.0375518	0.246417	0.0601327	-0.0943873	-0.00880597	-0.155087	0.153457	-0.396165	0.0391581	-0.204307		-0.0455792	0.0159148	-0.0287776	0.439794
1083	-0.273923	0.284861	-0.107169	0.0377642	0.246762	0.0599882	-0.0940463	-0.00894696	-0.15452	0.153738	-0.395826	0.0383516	-0.20506		-0.0458038	0.0156833	-0.0291586	0.441203
1084	-0.273674	0.285019	-0.106013	0.0379935	0.247106	0.0598428	-0.0936961	-0.00909599	-0.153958	0.154014	-0.395495	0.0375541	-0.205818		-0.0460285	0.0154614	-0.0295363	0.442542
1085	-0.273433	0.285178	-0.104854	0.0382396	0.247448	0.0596966	-0.0933369	-0.00925285	-0.153402	0.154287	-0.395171	0.0367658	-0.206583		-0.0462533	0.0152491	-0.0299106	0.44381
1086	-0.273202	0.285336	-0.10369	0.0385023	0.247788	0.0595492	-0.0929688	-0.0094173	-0.152852	0.154556	-0.394855	0.035987	-0.207352		-0.0464782	0.0150467	-0.0302817	0.445006
1087	-0.272979	0.285494	-0.102522	0.0387815	0.248126	0.0594007	-0.0925919	-0.00958913	-0.152308	0.154821	-0.394546	0.0352183	-0.208124		-0.0467032	0.0148544	-0.0306495	0.446129
1088	-0.272767	0.285652	-0.101351	0.039077	0.248461	0.0592509	-0.0922063	-0.0097681	-0.151771	0.155082	-0.394243	0.0344597	-0.208898		-0.0469282	0.0146723	-0.0310141	0.447178
1089	-0.272564	0.285809	-0.100175	0.0393885	0.248793	0.0590997	-0.0918124	-0.00995394	-0.15124	0.15534	-0.393946	0.0337117	-0.209673		-0.0471533	0.0145006	-0.0313756	0.448154
1090	-0.272371	0.285966	-0.0989959	0.0397159	0.249121	0.0589469	-0.0914101	-0.0101464	-0.150717	0.155593	-0.393656	0.0329745	-0.210447		-0.0473785	0.0143395	-0.031734	0.449055
1091	-0.272189	0.286122	-0.0978126	0.0400588	0.249446	0.0587925	-0.0909998	-0.0103452	-0.1502	0.155842	-0.393372	0.0322483	-0.21122		-0.0476037	0.014189	-0.0320894	0.44988
1092	-0.272018	0.286277	-0.0966255	0.0404169	0.249767	0.0586362	-0.0905815	-0.0105501	-0.149692	0.156088	-0.393093	0.0315335	-0.211991		-0.0478289	0.0140493	-0.0324417	0.45063
1093	-0.271857	0.286431	-0.0954346	0.04079	0.250084	0.0584781	-0.0901556	-0.0107608	-0.149191	0.156329	-0.392819	0.0308303	-0.212758		-0.0480542	0.0139207	-0.0327911	0.451304
1094	-0.271707	0.286584	-0.0942399	0.0411777	0.250396	0.058318	-0.0897222	-0.010977	-0.148698	0.156567	-0.392551	0.0301388	-0.21352		-0.0482795	0.013803	-0.0331377	0.451903
1095	-0.271569	0.286736	-0.0930415	0.0415797	0.250703	0.0581558	-0.0892816	-0.0111984	-0.148213	0.1568	-0.392288	0.0294593	-0.214277		-0.0485047	0.0136965	-0.0334815	0.452425
1096	-0.271442	0.286886	-0.0918393	0.0419956	0.251005	0.0579913	-0.0888339	-0.0114247	-0.147736	0.15703	-0.392029	0.0287919	-0.215026		-0.04873	0.0136013	-0.0338225	0.452872
1097	-0.271326	0.287035	-0.0906334	0.0424249	0.251301	0.0578245	-0.0883795	-0.0116556	-0.147268	0.157256	-0.391774	0.0281368	-0.215768		-0.0489552	0.0135174	-0.0341609	0.453242
1098	-0.271222	0.287183	-0.089424	0.0428675	0.251592	0.0576553	-0.0879186	-0.0118908	-0.146809	0.157478	-0.391524	0.0274941	-0.2165		-0.0491803	0.0134449	-0.0344967	0.453537
1099	-0.27113	0.287329	-0.088211	0.0433227	0.251877	0.0574835	-0.0874514	-0.0121299	-0.146359	0.157696	-0.391277	0.026864	-0.217223		-0.0494053	0.0133839	-0.03483	0.453756
1100	-0.271049	0.287473	-0.0869945	0.0437902	0.252156	0.0573091	-0.0869782	-0.0123726	-0.145917	0.157911	-0.391034	0.0262465	-0.217934		-0.0496303	0.0133344	-0.0351609	0.4539
1101	-0.270981	0.287615	-0.0857746	0.0442695	0.252429	0.057132	-0.0864994	-0.0126187	-0.145485	0.158122	-0.390795	0.0256417	-0.218634		-0.0498551	0.0132964	-0.0354894	0.453969
1102	-0.270924	0.287756	-0.0845514	0.0447603	0.252695	0.056952	-0.0860151	-0.0128677	-0.145061	0.15833	-0.390558	0.0250497	-0.219321		-0.0500797	0.01327	-0.0358157	0.453964
1103	-0.270879	0.287894	-0.083325	0.045262	0.252955	0.056769	-0.0855256	-0.0131193	-0.144647	0.158534	-0.390325	0.0244703	-0.219995		-0.0503042	0.0132551	-0.0361399	0.453885
1104	-0.270846	0.28803	-0.0820956	0.0457742	0.253208	0.0565831	-0.0850314	-0.0133732	-0.144242	0.158735	-0.390094	0.0239037	-0.220654		-0.0505284	0.0132518	-0.0364621	0.453732
1105	-0.270825	0.288164	-0.0808631	0.0462965	0.253455	0.056394	-0.0845327	-0.0136291	-0.143847	0.158932	-0.389865	0.0233498	-0.221298		-0.0507524	0.01326	-0.0367823	0.453507
1106	-0.270816	0.288296	-0.0796279	0.0468283	0.253694	0.0562018	-0.0840298	-0.0138864	-0.14346	0.159127	-0.389639	0.0228085	-0.221925		-0.050976	0.0132797	-0.0371006	0.45321
1107	-0.270818	0.288425	-0.0783899	0.0473692	0.253927	0.0560063	-0.083523	-0.0141451	-0.143084	0.159318	-0.389414	0.0222797	-0.222536		-0.0511992	0.0133108	-0.0374173	0.452841
1108	-0.270832	0.288552	-0.0771494	0.0479187	0.254153	0.0558075	-0.0830127	-0.0144045	-0.142717	0.159507	-0.389192	0.0217634	-0.223129		-0.051422	0.0133532	-0.0377323	0.452401
1109	-0.270858	0.288676	-0.0759065	0.0484763	0.254372	0.0556054	-0.0824993	-0.0146645	-0.142359	0.159693	-0.38897	0.0212594	-0.223704		-0.0516443	0.013407	-0.0380458	0.451892
1110	-0.270894	0.288798	-0.0746614	0.0490415	0.254584	0.0553998	-0.081983	-0.0149247	-0.142011	0.159876	-0.38875	0.0207676	-0.224259		-0.051866	0.0134718	-0.0383579	0.451313
1111	-0.270943	0.288917	-0.0734142	0.0496138	0.254789	0.0551908	-0.0814643	-0.0151846	-0.141672	0.160057	-0.388531	0.0202878	-0.224794		-0.052087	0.0135477	-0.0386687	0.450667
1112	-0.271002	0.289034	-0.0721652	0.0501927	0.254987	0.0549783	-0.0809435	-0.015444	-0.141342	0.160236	-0.388313	0.0198199	-0.225309		-0.0523073	0.0136346	-0.0389783	0.449953
1113	-0.271072	0.289148	-0.0709145	0.0507777	0.255178	0.0547622	-0.0804211	-0.0157026	-0.141023	0.160413	-0.388096	0.0193635	-0.225802		-0.0525267	0.0137321	-0.0392869	0.449173
1114	-0.271153	0.28926	-0.0696622	0.0513682	0.255362	0.0545426	-0.0798973	-0.0159599	-0.140712	0.160589	-0.387879	0.0189185	-0.226274		-0.0527452	0.0138403	-0.0395944	0.448328
1115	-0.271245	0.289369	-0.0684087	0.0519637	0.255539	0.0543195	-0.0793726	-0.0162156	-0.140411	0.160762	-0.387662	0.0184846	-0.226723		-0.0529627	0.0139588	-0.0399011	0.447419
1116	-0.271346	0.289475	-0.0671541	0.0525637	0.255709	0.0540928	-0.0788474	-0.0164693	-0.140119	0.160935	-0.387444	0.0180617	-0.227148		-0.0531791	0.0140875	-0.040207	0.446447
1117	-0.271458	0.289578	-0.0658986	0.0531676	0.255872	0.0538625	-0.0783221	-0.0167208	-0.139837	0.161106	-0.387227	0.0176493	-0.22755		-0.0533943	0.0142262	-0.0405122	0.445414
1118	-0.27158	0.289679	-0.0646425	0.053775	0.256028	0.0536287	-0.0777971	-0.0169697	-0.139564	0.161277	-0.387008	0.0172472	-0.227928		-0.0536082	0.0143747	-0.040817	0.444321
1119	-0.271711	0.289778	-0.0633859	0.0543853	0.256177	0.0533914	-0.0772727	-0.0172156	-0.139299	0.161447	-0.386789	0.0168551	-0.22828		-0.0538207	0.0145327	-0.0411213	0.443168
1120	-0.271852	0.289873	-0.0621291	0.054998	0.25632	0.0531505	-0.0767495	-0.0174582	-0.139044	0.161617	-0.386568	0.0164727	-0.228607		-0.0540317	0.0146998	-0.0414252	0.441958
1121	-0.272002	0.289966	-0.0608724	0.0556125	0.256455	0.0529061	-0.0762279	-0.0176972	-0.138798	0.161787	-0.386346	0.0160997	-0.228908		-0.0542411	0.014876	-0.041729	0.440691
1122	-0.27216	0.290057	-0.0596159	0.0562283	0.256584	0.0526584	-0.0757082	-0.0179321	-0.138561	0.161958	-0.386122	0.0157356	-0.229181		-0.0544487	0.0150609	-0.0420326	0.43937
1123	-0.272327	0.290145	-0.05836	0.056845	0.256706	0.0524072	-0.075191	-0.0181628	-0.138333	0.162129	-0.385896	0.0153801	-0.229428		-0.0546544	0.0152541	-0.0423363	0.437995
1124	-0.272502	0.29023	-0.0571049	0.057462	0.256822	0.0521526	-0.0746765	-0.0183888	-0.138113	0.162301	-0.385668	0.0150329	-0.229647		-0.0548582	0.0154555	-0.04264	0.436568
1125	-0.272685	0.290313	-0.0558509	0.0580788	0.25693	0.0518948	-0.0741653	-0.0186099	-0.137903	0.162474	-0.385438	0.0146936	-0.229837		-0.0550598	0.0156646	-0.0429439	0.435091
1126	-0.272875	0.290394	-0.0545983	0.0586949	0.257032	0.0516337	-0.0736578	-0.0188256	-0.1377	0.162649	-0.385205	0.0143617	-0.229998		-0.0552591	0.0158812	-0.0432481	0.433566
1127	-0.273072	0.290472	-0.0533474	0.0593098	0.257127	0.0513695	-0.0731542	-0.0190358	-0.137506	0.162826	-0.384969	0.0140369	-0.230129		-0.055456	0.016105	-0.0435527	0.431993
1128	-0.273275	0.290548	-0.0520984	0.059923	0.257216	0.0511022	-0.0726552	-0.01924	-0.137321	0.163006	-0.38473	0.0137187	-0.23023		-0.0556503	0.0163356	-0.0438577	0.430375
1129	-0.273485	0.290621	-0.0508518	0.0605341	0.257298	0.0508319	-0.0721609	-0.019438	-0.137144	0.163188	-0.384488	0.0134068	-0.230301		-0.0558418	0.0165727	-0.0441632	0.428713
1130	-0.273701	0.290692	-0.0496078	0.0611427	0.257373	0.0505587	-0.0716719	-0.0196294	-0.136975	0.163373	-0.384244	0.0131006	-0.23034		-0.0560305	0.0168158	-0.0444693	0.427009
1131	-0.273922	0.290762	-0.0483667	0.0617481	0.257441	0.0502827	-0.0711885	-0.019814	-0.136814	0.163562	-0.383996	0.0127999	-0.230348		-0.0562161	0.0170647	-0.0447762	0.425265
1132	-0.274147	0.290829	-0.0471289	0.0623501	0.257503	0.0500039	-0.070711	-0.0199915	-0.136662	0.163754	-0.383745	0.0125041	-0.230323		-0.0563984	0.017319	-0.0450837	0.423483
1133	-0.274378	0.290893	-0.0458948	0.0629482	0.257558	0.0497225	-0.0702398	-0.0201616	-0.136517	0.163951	-0.383491	0.0122129	-0.230267		-0.0565774	0.0175782	-0.0453921	0.421664
1134	-0.274612	0.290956	-0.0446647	0.0635419	0.257607	0.0494386	-0.0697753	-0.020324	-0.13638	0.164152	-0.383234	0.0119257	-0.230177		-0.0567528	0.017842	-0.0457014	0.41981
1135	-0.27485	0.291017	-0.043439	0.0641309	0.257648	0.0491522	-0.0693178	-0.0204785	-0.136251	0.164358	-0.382974	0.0116422	-0.230054		-0.0569245	0.0181101	-0.0460117	0.417923
1136	-0.27509	0.291076	-0.042218	0.0647147	0.257683	0.0488635	-0.0688676	-0.0206248	-0.13613	0.164569	-0.382712	0.0113619	-0.229898		-0.0570923	0.0183819	-0.0463229	0.416005
1137	-0.275334	0.291134	-0.0410022	0.0652931	0.257711	0.0485726	-0.068425	-0.0207626	-0.136016	0.164786	-0.382446	0.0110844	-0.229709		-0.0572561	0.0186572	-0.0466352	0.414058
1138	-0.275579	0.291189	-0.0397919	0.0658655	0.257732	0.0482795	-0.0679904	-0.0208918	-0.13591	0.165009	-0.382179	0.0108093	-0.229485		-0.0574158	0.0189354	-0.0469485	0.412084
1139	-0.275826	0.291243	-0.0385876	0.0664318	0.257747	0.0479845	-0.0675639	-0.0210121	-0.135811	0.165239	-0.381909	0.0105361	-0.229228		-0.0575712	0.0192164	-0.047263	0.410084
1140	-0.276074	0.291296	-0.0373897	0.0669915	0.257755	0.0476877	-0.0671458	-0.0211232	-0.13572	0.165475	-0.381637	0.0102644	-0.228936		-0.0577222	0.0194996	-0.0475787	0.40806
1141	-0.276322	0.291347	-0.0361985	0.0675444	0.257755	0.0473891	-0.0667364	-0.0212251	-0.135635	0.165719	-0.381363	0.00999369	-0.228611		-0.0578686	0.0197846	-0.0478956	0.406014
1142	-0.276571	0.291396	-0.0350146	0.0680902	0.257749	0.047089	-0.066336	-0.0213174	-0.135558	0.165971	-0.381087	0.00972366	-0.228251		-0.0580104	0.0200712	-0.0482137	0.403948
1143	-0.276819	0.291445	-0.0338383	0.0686286	0.257736	0.0467875	-0.0659446	-0.0214001	-0.135488	0.16623	-0.38081	0.00945384	-0.227857		-0.0581475	0.0203588	-0.048533	0.401862
1144	-0.277065	0.291492	-0.03267	0.0691594	0.257716	0.0464846	-0.0655626	-0.0214729	-0.135425	0.166498	-0.380532	0.00918379	-0.227429		-0.0582798	0.0206472	-0.0488537	0.39976
1145	-0.27731	0.291538	-0.0315103	0.0696824	0.25769	0.0461807	-0.0651901	-0.0215357	-0.135368	0.166775	-0.380253	0.00891311	-0.226967		-0.0584071	0.020936	-0.0491756	0.397642
1146	-0.277553	0.291583	-0.0303595	0.0701974	0.257656	0.0458759	-0.0648273	-0.0215884	-0.135318	0.167061	-0.379973	0.00864135	-0.226471		-0.0585294	0.0212247	-0.0494988	0.395509
1147	-0.277794	0.291627	-0.0292181	0.0707041	0.257615	0.0455702	-0.0644743	-0.0216308	-0.135275	0.167357	-0.379694	0.00836811	-0.225941		-0.0586467	0.021513	-0.0498233	0.393365
1148	-0.278031	0.29167	-0.0280865	0.0712024	0.257567	0.0452639	-0.0641312	-0.0216629	-0.135239	0.167662	-0.379414	0.00809296	-0.225377		-0.0587589	0.0218006	-0.0501491	0.39121
1149	-0.278264	0.291712	-0.0269652	0.0716922	0.257513	0.0449572	-0.0637983	-0.0216846	-0.135209	0.167978	-0.379134	0.0078155	-0.22478		-0.0588658	0.022087	-0.0504762	0.389045
1150	-0.278493	0.291754	-0.0258544	0.0721733	0.257451	0.0446503	-0.0634755	-0.0216957	-0.135185	0.168305	-0.378855	0.0075353	-0.224149		-0.0589676	0.022372	-0.0508046	0.386872
1151	-0.278717	0.291796	-0.0247548	0.0726457	0.257382	0.0443432	-0.0631631	-0.0216963	-0.135167	0.168643	-0.378577	0.00725199	-0.223485		-0.059064	0.0226551	-0.0511342	0.384693
1152	-0.278936	0.291837	-0.0236666	0.0731091	0.257306	0.0440362	-0.062861	-0.0216862	-0.135156	0.168992	-0.3783	0.00696516	-0.222787		-0.0591553	0.0229361	-0.0514652	0.38251
1153	-0.279149	0.291878	-0.0225903	0.0735636	0.257223	0.0437295	-0.0625695	-0.0216654	-0.135151	0.169352	-0.378024	0.00667444	-0.222057		-0.0592412	0.0232146	-0.0517973	0.380322
1154	-0.279356	0.291919	-0.0215263	0.074009	0.257132	0.0434231	-0.0622884	-0.021634	-0.135152	0.169725	-0.37775	0.00637946	-0.221294		-0.0593218	0.0234902	-0.0521307	0.378132
1155	-0.279555	0.29196	-0.0204749	0.0744454	0.257035	0.0431173	-0.0620179	-0.0215918	-0.135159	0.170109	-0.377478	0.00607986	-0.220498		-0.0593972	0.0237627	-0.0524653	0.375941
1156	-0.279748	0.292001	-0.0194365	0.0748727	0.25693	0.0428123	-0.0617579	-0.021539	-0.135172	0.170506	-0.377209	0.00577531	-0.219671		-0.0594673	0.0240317	-0.0528011	0.373751
1157	-0.279932	0.292042	-0.0184115	0.0752909	0.256817	0.0425081	-0.0615086	-0.0214755	-0.13519	0.170916	-0.376942	0.00546546	-0.218811		-0.0595321	0.0242969	-0.0531379	0.371561
1158	-0.280108	0.292083	-0.0174002	0.0756999	0.256698	0.0422049	-0.0612698	-0.0214013	-0.135214	0.171338	-0.376678	0.00515001	-0.217919		-0.0595917	0.0245581	-0.0534758	0.369374
1159	-0.280276	0.292125	-0.0164029	0.0760999	0.256571	0.0419029	-0.0610416	-0.0213165	-0.135245	0.171773	-0.376418	0.00482865	-0.216996		-0.0596461	0.0248149	-0.0538148	0.36719
1160	-0.280434	0.292167	-0.0154199	0.0764909	0.256436	0.0416021	-0.060824	-0.0212212	-0.13528	0.172222	-0.37616	0.00450108	-0.216043		-0.0596954	0.0250671	-0.0541547	0.365011
1161	-0.280582	0.29221	-0.0144515	0.0768729	0.256295	0.0413027	-0.0606168	-0.0211155	-0.135321	0.172684	-0.375907	0.00416704	-0.215058		-0.0597397	0.0253144	-0.0544956	0.362837
1162	-0.280721	0.292253	-0.0134981	0.077246	0.256145	0.0410048	-0.06042	-0.0209994	-0.135368	0.173159	-0.375657	0.00382626	-0.214043		-0.0597789	0.0255566	-0.0548375	0.360668
1163	-0.280848	0.292298	-0.0125598	0.0776103	0.255988	0.0407085	-0.0602335	-0.0208731	-0.13542	0.173647	-0.375412	0.00347848	-0.212999		-0.0598131	0.0257934	-0.0551801	0.358507
1164	-0.280965	0.292343	-0.011637	0.0779659	0.255824	0.0404139	-0.0600573	-0.0207366	-0.135478	0.17415	-0.375171	0.00312346	-0.211925		-0.0598424	0.0260245	-0.0555237	0.356353
1165	-0.28107	0.29239	-0.0107298	0.078313	0.255652	0.0401211	-0.0598911	-0.0205901	-0.13554	0.174666	-0.374935	0.00276098	-0.210821		-0.0598669	0.0262498	-0.055868	0.354207
1166	-0.281164	0.292437	-0.00983854	0.0786516	0.255472	0.0398301	-0.059735	-0.0204339	-0.135609	0.175195	-0.374703	0.00239082	-0.20969		-0.0598866	0.026469	-0.0562131	0.352071
1167	-0.281245	0.292486	-0.00896337	0.078982	0.255284	0.0395412	-0.0595886	-0.0202679	-0.135682	0.175739	-0.374476	0.00201278	-0.20853		-0.0599016	0.026682	-0.056559	0.349943
1168	-0.281314	0.292535	-0.0081045	0.0793043	0.255089	0.0392542	-0.0594519	-0.0200925	-0.135761	0.176296	-0.374254	0.00162665	-0.207343		-0.059912	0.0268886	-0.0569056	0.347826
1169	-0.28137	0.292587	-0.00726209	0.0796187	0.254886	0.0389694	-0.0593247	-0.0199078	-0.135844	0.176867	-0.374037	0.00123226	-0.206129		-0.0599178	0.0270885	-0.057253	0.34572
1170	-0.281414	0.292639	-0.00643631	0.0799254	0.254675	0.0386867	-0.0592068	-0.019714	-0.135933	0.177451	-0.373825	0.000829442	-0.204889		-0.0599192	0.0272817	-0.057601	0.343625
1171	-0.281443	0.292693	-0.0056273	0.0802245	0.254457	0.0384062	-0.0590979	-0.0195114	-0.136027	0.17805	-0.373618	0.000418028	-0.203623		-0.0599162	0.027468	-0.0579498	0.341541
1172	-0.281459	0.292748	-0.00483517	0.0805162	0.254231	0.0381281	-0.058998	-0.0193003	-0.136127	0.178662	-0.373416	-2.12788e-06	-0.202332		-0.0599088	0.0276472	-0.0582992	0.33947
1173	-0.281461	0.292805	-0.00406004	0.0808009	0.253997	0.0378522	-0.0589067	-0.0190808	-0.136231	0.179287	-0.373219	-0.000431163	-0.201017		-0.0598972	0.0278193	-0.0586492	0.337411
1174	-0.281449	0.292864	-0.00330201	0.0810786	0.253755	0.0375788	-0.0588238	-0.0188533	-0.13634	0.179926	-0.373027	-0.000869205	-0.199678		-0.0598815	0.027984	-0.059	0.335364
1175	-0.281423	0.292924	-0.00256114	0.0813496	0.253506	0.0373077	-0.058749	-0.0186181	-0.136454	0.180578	-0.37284	-0.00131637	-0.198318		-0.0598616	0.0281414	-0.0593513	0.333331
1176	-0.281381	0.292986	-0.00183752	0.0816142	0.253248	0.0370391	-0.0586822	-0.0183755	-0.136573	0.181244	-0.372658	-0.00177278	-0.196935		-0.0598378	0.0282913	-0.0597034	0.331312
1177	-0.281325	0.29305	-0.0011312	0.0818726	0.252983	0.0367731	-0.0586229	-0.0181258	-0.136697	0.181922	-0.37248	-0.00223855	-0.195531		-0.0598101	0.0284335	-0.060056	0.329305
1178	-0.281254	0.293115	-0.000442214	0.0821251	0.252711	0.0365095	-0.0585711	-0.0178693	-0.136826	0.182613	-0.372306	-0.00271376	-0.194108		-0.0597785	0.0285681	-0.0604093	0.327312
1179	-0.281168	0.293182	0.000229403	0.0823718	0.25243	0.0362486	-0.0585262	-0.0176065	-0.13696	0.183316	-0.372137	-0.00319852	-0.192665		-0.0597433	0.028695	-0.0607632	0.325333
1180	-0.281067	0.29325	0.000883634	0.082613	0.252142	0.0359903	-0.0584882	-0.0173377	-0.137098	0.184032	-0.371972	-0.00369293	-0.191203		-0.0597044	0.028814	-0.0611178	0.323367
1181	-0.28095	0.29332	0.00152048	0.0828491	0.251847	0.0357346	-0.0584566	-0.0170632	-0.137241	0.18476	-0.37181	-0.00419706	-0.189725		-0.059662	0.0289251	-0.061473	0.321415
1182	-0.280817	0.293392	0.00213994	0.0830802	0.251543	0.0354817	-0.0584313	-0.0167834	-0.13739	0.1855	-0.371653	-0.00471099	-0.18823		-0.0596162	0.0290283	-0.0618288	0.319476
1183	-0.28067	0.293466	0.00274206	0.0833067	0.251233	0.0352315	-0.0584117	-0.0164988	-0.137543	0.186251	-0.371498	-0.00523479	-0.186719		-0.0595671	0.0291236	-0.0621854	0.317551
1184	-0.280506	0.293541	0.00332687	0.0835289	0.250915	0.034984	-0.0583977	-0.0162098	-0.1377	0.187013	-0.371347	-0.00576851	-0.185193		-0.0595147	0.0292108	-0.0625425	0.315638
1185	-0.280327	0.293618	0.00389442	0.083747	0.250589	0.0347394	-0.058389	-0.0159168	-0.137863	0.187786	-0.371198	-0.00631222	-0.183655		-0.0594593	0.02929	-0.0629004	0.313739
1186	-0.280132	0.293696	0.00444479	0.0839614	0.250256	0.0344976	-0.0583851	-0.0156202	-0.13803	0.18857	-0.371052	-0.00686593	-0.182103		-0.0594008	0.0293612	-0.063259	0.311852
1187	-0.279922	0.293776	0.00497805	0.0841723	0.249916	0.0342588	-0.0583859	-0.0153204	-0.138201	0.189363	-0.370908	-0.00742968	-0.18054		-0.0593394	0.0294243	-0.0636184	0.309978
1188	-0.279696	0.293858	0.00549429	0.0843801	0.249569	0.0340229	-0.0583908	-0.0150179	-0.138378	0.190167	-0.370766	-0.00800347	-0.178966		-0.0592751	0.0294793	-0.0639784	0.308116
1189	-0.279455	0.293941	0.0059936	0.0845851	0.249215	0.0337899	-0.0583997	-0.0147131	-0.138558	0.19098	-0.370624	-0.00858732	-0.177383		-0.0592082	0.0295263	-0.0643393	0.306266
1190	-0.279198	0.294025	0.00647609	0.0847877	0.248854	0.0335601	-0.0584122	-0.0144066	-0.138744	0.191802	-0.370484	-0.00918122	-0.175791		-0.0591386	0.0295653	-0.064701	0.304427
1191	-0.278926	0.29411	0.00694185	0.0849882	0.248486	0.0333333	-0.0584278	-0.0140987	-0.138933	0.192632	-0.370344	-0.00978515	-0.174191		-0.0590665	0.0295964	-0.0650636	0.3026
1192	-0.278638	0.294196	0.00739101	0.0851869	0.248111	0.0331097	-0.0584464	-0.01379	-0.139127	0.193471	-0.370204	-0.0103991	-0.172585		-0.058992	0.0296195	-0.065427	0.300784
1193	-0.278336	0.294284	0.00782368	0.0853842	0.247729	0.0328892	-0.0584676	-0.0134808	-0.139326	0.194318	-0.370063	-0.011023	-0.170974		-0.0589151	0.0296348	-0.0657913	0.298978
1194	-0.278019	0.294373	0.00823999	0.0855805	0.247341	0.0326721	-0.058491	-0.0131717	-0.139529	0.195172	-0.369921	-0.0116569	-0.169358		-0.0588359	0.0296424	-0.0661565	0.297183
1195	-0.277687	0.294462	0.00864008	0.0857761	0.246946	0.0324582	-0.0585163	-0.0128632	-0.139736	0.196033	-0.369777	-0.0123007	-0.167738		-0.0587545	0.0296422	-0.0665226	0.295397
1196	-0.277341	0.294552	0.00902407	0.0859714	0.246544	0.0322477	-0.0585431	-0.0125558	-0.139947	0.1969	-0.369631	-0.0129544	-0.166116		-0.058671	0.0296345	-0.0668897	0.29362
1197	-0.27698	0.294643	0.0093921	0.0861667	0.246136	0.0320405	-0.0585712	-0.0122498	-0.140162	0.197774	-0.369482	-0.0136179	-0.164492		-0.0585855	0.0296193	-0.0672577	0.291852
1198	-0.276606	0.294735	0.00974433	0.0863626	0.245722	0.0318368	-0.0586001	-0.0119459	-0.140381	0.198653	-0.369329	-0.0142911	-0.162866		-0.0584979	0.0295967	-0.0676268	0.290093
1199	-0.276217	0.294827	0.0100809	0.0865592	0.245301	0.0316367	-0.0586296	-0.0116444	-0.140605	0.199538	-0.369172	-0.014974	-0.161241		-0.0584084	0.0295669	-0.0679968	0.288342
1200	-0.275815	0.294919	0.010402	0.0867571	0.244875	0.03144	-0.0586594	-0.0113459	-0.140832	0.200428	-0.369011	-0.0156665	-0.159616		-0.0583171	0.0295301	-0.0683678	0.286599
1201	-0.2754	0.295012	0.0107077	0.0869565	0.244442	0.0312469	-0.0586891	-0.0110509	-0.141063	0.201323	-0.368844	-0.0163686	-0.157993		-0.058224	0.0294863	-0.0687398	0.284862
1202	-0.274972	0.295105	0.0109982	0.087158	0.244003	0.0310574	-0.0587184	-0.0107597	-0.141297	0.202222	-0.368671	-0.01708	-0.156372		-0.0581292	0.0294358	-0.0691128	0.283133
1203	-0.274532	0.295198	0.0112737	0.0873617	0.243558	0.0308715	-0.058747	-0.0104729	-0.141536	0.203124	-0.368492	-0.0178008	-0.154753		-0.0580327	0.0293788	-0.0694867	0.281409
1204	-0.274079	0.295291	0.0115344	0.0875682	0.243108	0.0306893	-0.0587746	-0.0101909	-0.141778	0.20403	-0.368305	-0.0185307	-0.153137		-0.0579346	0.0293154	-0.0698616	0.279692
1205	-0.273614	0.295383	0.0117805	0.0877778	0.242651	0.0305108	-0.0588009	-0.00991414	-0.142023	0.204939	-0.36811	-0.0192697	-0.151525		-0.0578349	0.0292458	-0.0702375	0.277981
1206	-0.273138	0.295476	0.012012	0.0879909	0.242189	0.030336	-0.0588256	-0.00964306	-0.142272	0.205851	-0.367907	-0.0200177	-0.149916		-0.0577338	0.0291704	-0.0706142	0.276275
1207	-0.27265	0.295567	0.0122293	0.0882078	0.241721	0.0301649	-0.0588484	-0.00937809	-0.142523	0.206765	-0.367695	-0.0207744	-0.148312		-0.0576313	0.0290893	-0.0709918	0.274574
1208	-0.272152	0.295659	0.0124324	0.088429	0.241247	0.0299976	-0.0588691	-0.00911964	-0.142779	0.207681	-0.367474	-0.0215398	-0.146713		-0.0575274	0.0290028	-0.0713702	0.272878
1209	-0.271643	0.295749	0.0126216	0.0886547	0.240767	0.029834	-0.0588873	-0.00886809	-0.143037	0.208598	-0.367242	-0.0223136	-0.14512		-0.0574223	0.0289111	-0.0717494	0.271186
1210	-0.271124	0.295839	0.012797	0.0888853	0.240282	0.0296742	-0.0589027	-0.00862384	-0.143298	0.209516	-0.366999	-0.0230957	-0.143531		-0.0573159	0.0288146	-0.0721293	0.269498
1211	-0.270595	0.295928	0.0129588	0.0891212	0.239792	0.0295183	-0.0589152	-0.00838725	-0.143562	0.210436	-0.366745	-0.0238858	-0.141948		-0.0572084	0.0287135	-0.0725099	0.267814
1212	-0.270057	0.296016	0.0131072	0.0893626	0.239295	0.0293661	-0.0589244	-0.00815869	-0.143828	0.211355	-0.366479	-0.0246838	-0.140371		-0.0570998	0.0286081	-0.0728912	0.266134
1213	-0.26951	0.296103	0.0132425	0.08961	0.238794	0.0292178	-0.0589301	-0.00793849	-0.144097	0.212275	-0.366201	-0.0254894	-0.1388		-0.0569903	0.0284987	-0.0732731	0.264456
1214	-0.268954	0.296189	0.0133647	0.0898636	0.238286	0.0290732	-0.058932	-0.00772697	-0.144369	0.213195	-0.36591	-0.0263024	-0.137235		-0.0568799	0.0283857	-0.0736555	0.262782
1215	-0.268391	0.296274	0.0134742	0.0901237	0.237773	0.0289325	-0.0589299	-0.00752443	-0.144643	0.214114	-0.365607	-0.0271225	-0.135676		-0.0567686	0.0282693	-0.0740383	0.26111
1216	-0.267819	0.296357	0.0135711	0.0903907	0.237254	0.0287957	-0.0589235	-0.00733117	-0.144918	0.215032	-0.36529	-0.0279495	-0.134124		-0.0566567	0.02815	-0.0744216	0.259441
1217	-0.26724	0.296439	0.0136556	0.0906648	0.23673	0.0286626	-0.0589127	-0.00714745	-0.145196	0.215949	-0.364959	-0.028783	-0.132578		-0.0565442	0.028028	-0.0748052	0.257774
1218	-0.266655	0.296519	0.0137279	0.0909464	0.2362	0.0285333	-0.0588972	-0.00697353	-0.145476	0.216864	-0.364614	-0.0296229	-0.131037		-0.0564311	0.0279037	-0.075189	0.25611
1219	-0.266063	0.296599	0.0137883	0.0912356	0.235665	0.0284078	-0.0588768	-0.00680962	-0.145757	0.217777	-0.364254	-0.0304687	-0.129503		-0.0563177	0.0277774	-0.075573	0.254447
1220	-0.265464	0.296676	0.0138371	0.0915329	0.235123	0.0282861	-0.0588513	-0.00665596	-0.14604	0.218689	-0.363881	-0.0313202	-0.127975		-0.0562041	0.0276494	-0.0759572	0.252787
1221	-0.264861	0.296752	0.0138744	0.0918384	0.234576	0.0281681	-0.0588205	-0.00651273	-0.146323	0.219597	-0.363492	-0.032177	-0.126453		-0.0560904	0.0275202	-0.0763414	0.251128
1222	-0.264252	0.296826	0.0139005	0.0921524	0.234023	0.0280539	-0.0587843	-0.00638011	-0.146608	0.220503	-0.363089	-0.0330388	-0.124937		-0.0559767	0.02739	-0.0767255	0.249472
1223	-0.263638	0.296899	0.0139157	0.0924751	0.233464	0.0279434	-0.0587425	-0.00625826	-0.146894	0.221405	-0.362671	-0.0339052	-0.123426		-0.0558632	0.0272591	-0.0771096	0.247818
1224	-0.26302	0.29697	0.0139202	0.0928069	0.232898	0.0278365	-0.058695	-0.00614731	-0.14718	0.222305	-0.362238	-0.0347758	-0.121922		-0.0557502	0.027128	-0.0774934	0.246166
1225	-0.262399	0.297039	0.0139143	0.0931478	0.232327	0.0277333	-0.0586415	-0.00604738	-0.147467	0.2232	-0.36179	-0.0356503	-0.120423		-0.0556377	0.0269968	-0.0778768	0.244516
1226	-0.261774	0.297106	0.0138982	0.0934981	0.23175	0.0276337	-0.0585821	-0.00595857	-0.147753	0.224091	-0.361327	-0.0365282	-0.118929		-0.055526	0.0268659	-0.0782599	0.242869
1227	-0.261146	0.297172	0.0138722	0.0938581	0.231166	0.0275376	-0.0585165	-0.00588096	-0.14804	0.224978	-0.360849	-0.0374092	-0.117442		-0.0554154	0.0267357	-0.0786425	0.241224
1228	-0.260516	0.297236	0.0138366	0.0942279	0.230576	0.027445	-0.0584447	-0.0058146	-0.148327	0.225861	-0.360357	-0.0382928	-0.115959		-0.055306	0.0266065	-0.0790245	0.239582
1229	-0.259883	0.297298	0.0137917	0.0946077	0.229979	0.0273559	-0.0583665	-0.00575955	-0.148613	0.226739	-0.35985	-0.0391787	-0.114483		-0.055198	0.0264785	-0.0794058	0.237942
1230	-0.259249	0.297359	0.0137378	0.0949977	0.229376	0.0272701	-0.058282	-0.00571584	-0.148898	0.227611	-0.359329	-0.0400663	-0.113012		-0.0550917	0.026352	-0.0797862	0.236306
1231	-0.258614	0.297417	0.013675	0.095398	0.228766	0.0271877	-0.058191	-0.00568347	-0.149183	0.228478	-0.358793	-0.0409554	-0.111546		-0.0549874	0.0262273	-0.0801658	0.234672
1232	-0.257979	0.297474	0.0136037	0.0958089	0.228149	0.0271085	-0.0580935	-0.00566244	-0.149466	0.22934	-0.358244	-0.0418453	-0.110086		-0.0548853	0.0261047	-0.0805444	0.23304
1233	-0.257343	0.29753	0.0135242	0.0962305	0.227525	0.0270324	-0.0579894	-0.00565272	-0.149748	0.230195	-0.357681	-0.0427357	-0.108632		-0.0547856	0.0259844	-0.0809218	0.231412
1234	-0.256707	0.297584	0.0134367	0.0966629	0.226894	0.0269594	-0.0578788	-0.00565426	-0.150028	0.231045	-0.357104	-0.0436261	-0.107184		-0.0546888	0.0258667	-0.0812979	0.229786
1235	-0.256072	0.297636	0.0133415	0.0971062	0.226256	0.0268894	-0.0577616	-0.00566701	-0.150306	0.231887	-0.356515	-0.0445161	-0.105741		-0.0545949	0.0257519	-0.0816727	0.228163
1236	-0.255438	0.297686	0.0132389	0.0975607	0.22561	0.0268222	-0.0576378	-0.00569087	-0.150582	0.232724	-0.355913	-0.0454053	-0.104305		-0.0545045	0.0256401	-0.082046	0.226542
1237	-0.254806	0.297735	0.0131292	0.0980264	0.224957	0.0267578	-0.0575075	-0.00572576	-0.150856	0.233553	-0.355298	-0.0462932	-0.102874		-0.0544177	0.0255316	-0.0824177	0.224923
1238	-0.254175	0.297783	0.0130126	0.0985033	0.224296	0.0266959	-0.0573706	-0.00577154	-0.151127	0.234375	-0.354672	-0.0471793	-0.101449		-0.0543349	0.0254265	-0.0827877	0.223306
1239	-0.253547	0.297829	0.0128894	0.0989917	0.223627	0.0266365	-0.0572274	-0.00582811	-0.151395	0.23519	-0.354035	-0.0480634	-0.100031		-0.0542564	0.0253252	-0.0831557	0.221691
1240	-0.252921	0.297874	0.01276	0.0994915	0.22295	0.0265794	-0.0570777	-0.0058953	-0.151661	0.235997	-0.353386	-0.0489448	-0.0986188		-0.0541826	0.0252277	-0.0835218	0.220077
1241	-0.252298	0.297917	0.0126245	0.100003	0.222265	0.0265244	-0.0569218	-0.00597295	-0.151922	0.236796	-0.352728	-0.0498232	-0.0972129		-0.0541138	0.0251343	-0.0838857	0.218465
1242	-0.251679	0.29796	0.0124833	0.100526	0.221571	0.0264714	-0.0567596	-0.00606089	-0.152181	0.237588	-0.352059	-0.0506981	-0.0958132		-0.0540504	0.0250451	-0.0842472	0.216853
1243	-0.251063	0.298001	0.0123367	0.10106	0.220869	0.0264202	-0.0565914	-0.00615892	-0.152435	0.238371	-0.35138	-0.0515692	-0.0944198		-0.0539927	0.0249603	-0.0846064	0.215242
1244	-0.250451	0.298042	0.012185	0.101606	0.220159	0.0263706	-0.0564172	-0.00626683	-0.152685	0.239145	-0.350693	-0.0524359	-0.0930327		-0.053941	0.0248801	-0.084963	0.21363
1245	-0.249844	0.298081	0.0120284	0.102163	0.219439	0.0263223	-0.0562371	-0.00638441	-0.152931	0.239911	-0.349997	-0.0532979	-0.0916517		-0.0538959	0.0248046	-0.0853169	0.212019
1246	-0.249241	0.29812	0.0118673	0.102732	0.218711	0.0262753	-0.0560514	-0.00651142	-0.153173	0.240668	-0.349294	-0.0541547	-0.0902768		-0.0538575	0.024734	-0.085668	0.210406
1247	-0.248642	0.298157	0.0117019	0.103313	0.217973	0.0262293	-0.0558601	-0.00664761	-0.15341	0.241417	-0.348582	-0.055006	-0.088908		-0.0538264	0.0246684	-0.0860161	0.208793
1248	-0.248049	0.298195	0.0115326	0.103905	0.217226	0.0261841	-0.0556635	-0.00679272	-0.153641	0.242156	-0.347864	-0.0558513	-0.0875452		-0.0538028	0.0246079	-0.0863611	0.207179
1249	-0.247461	0.298231	0.0113595	0.104508	0.21647	0.0261394	-0.0554617	-0.00694647	-0.153868	0.242885	-0.347139	-0.0566902	-0.0861883		-0.0537872	0.0245527	-0.0867028	0.205563
1250	-0.246879	0.298267	0.011183	0.105122	0.215705	0.0260951	-0.055255	-0.00710859	-0.154089	0.243606	-0.346409	-0.0575224	-0.0848373		-0.0537799	0.0245028	-0.0870412	0.203945
1251	-0.246302	0.298303	0.0110034	0.105748	0.214929	0.0260508	-0.0550434	-0.00727877	-0.154305	0.244317	-0.345673	-0.0583475	-0.083492		-0.0537814	0.0244584	-0.0873761	0.202325
1252	-0.245731	0.298338	0.0108208	0.106384	0.214144	0.0260064	-0.0548274	-0.00745671	-0.154515	0.245018	-0.344931	-0.0591651	-0.0821525		-0.0537918	0.0244195	-0.0877074	0.200703
1253	-0.245167	0.298374	0.0106356	0.107031	0.21335	0.0259616	-0.0546069	-0.00764207	-0.154718	0.245709	-0.344185	-0.0599748	-0.0808185		-0.0538118	0.0243863	-0.0880348	0.199078
1254	-0.244608	0.298409	0.010448	0.107689	0.212545	0.0259162	-0.0543824	-0.00783453	-0.154916	0.246391	-0.343435	-0.0607764	-0.07949		-0.0538415	0.0243588	-0.0883584	0.197451
1255	-0.244056	0.298444	0.0102583	0.108358	0.211731	0.0258699	-0.054154	-0.00803374	-0.155107	0.247063	-0.342681	-0.0615696	-0.0781669		-0.0538813	0.024337	-0.0886779	0.195821
1256	-0.24351	0.29848	0.0100666	0.109037	0.210907	0.0258224	-0.053922	-0.00823937	-0.155291	0.247725	-0.341923	-0.062354	-0.0768489		-0.0539316	0.0243211	-0.0889933	0.194188
1257	-0.242971	0.298515	0.00987328	0.109726	0.210072	0.0257737	-0.0536866	-0.00845104	-0.155469	0.248377	-0.341162	-0.0631293	-0.0755361		-0.0539928	0.0243112	-0.0893044	0.192552
1258	-0.242439	0.298551	0.0096785	0.110425	0.209228	0.0257233	-0.0534481	-0.00866839	-0.15564	0.249019	-0.340399	-0.0638953	-0.0742281		-0.054065	0.0243071	-0.089611	0.190912
1259	-0.241913	0.298588	0.00948248	0.111134	0.208374	0.0256711	-0.0532068	-0.00889105	-0.155803	0.249651	-0.339633	-0.0646518	-0.0729249		-0.0541488	0.024309	-0.0899131	0.189269
1260	-0.241395	0.298625	0.00928544	0.111852	0.207509	0.0256168	-0.0529628	-0.00911864	-0.15596	0.250273	-0.338864	-0.0653986	-0.0716262		-0.0542442	0.0243168	-0.0902105	0.187621
1261	-0.240883	0.298663	0.00908759	0.112579	0.206634	0.0255602	-0.0527165	-0.00935079	-0.156109	0.250885	-0.338094	-0.0661354	-0.0703319		-0.0543517	0.0243307	-0.0905032	0.18597
1262	-0.240378	0.298701	0.00888911	0.113315	0.205749	0.025501	-0.0524682	-0.0095871	-0.15625	0.251487	-0.337322	-0.0668621	-0.0690419		-0.0544716	0.0243505	-0.0907909	0.184313
1263	-0.239881	0.298741	0.0086902	0.11406	0.204854	0.0254392	-0.0522181	-0.00982718	-0.156384	0.252079	-0.336548	-0.0675784	-0.0677559		-0.054604	0.0243762	-0.0910736	0.182652
1264	-0.23939	0.298782	0.00849103	0.114813	0.203949	0.0253744	-0.0519664	-0.0100706	-0.156509	0.252661	-0.335774	-0.0682843	-0.0664738		-0.0547493	0.0244079	-0.0913512	0.180986
1265	-0.238907	0.298823	0.00829177	0.115573	0.203034	0.0253064	-0.0517135	-0.0103171	-0.156627	0.253234	-0.334998	-0.0689797	-0.0651953		-0.0549077	0.0244455	-0.0916235	0.179314
1266	-0.238431	0.298866	0.00809259	0.116341	0.202108	0.0252351	-0.0514597	-0.0105661	-0.156737	0.253796	-0.334222	-0.0696643	-0.0639202		-0.0550795	0.024489	-0.0918904	0.177637
1267	-0.237962	0.298911	0.00789364	0.117116	0.201173	0.0251602	-0.0512051	-0.0108173	-0.156839	0.254349	-0.333446	-0.0703382	-0.0626484		-0.0552648	0.0245382	-0.0921519	0.175953
1268	-0.2375	0.298957	0.00769508	0.117898	0.200227	0.0250816	-0.0509502	-0.0110702	-0.156933	0.254892	-0.332669	-0.0710011	-0.0613796		-0.0554638	0.0245931	-0.0924078	0.174263
1269	-0.237046	0.299004	0.00749705	0.118686	0.199272	0.0249991	-0.050695	-0.0113245	-0.157018	0.255426	-0.331893	-0.0716531	-0.0601135		-0.0556768	0.0246537	-0.0926581	0.172566
1270	-0.236598	0.299053	0.00729972	0.11948	0.198307	0.0249126	-0.05044	-0.0115797	-0.157096	0.25595	-0.331117	-0.0722941	-0.05885		-0.0559039	0.0247199	-0.0929026	0.170861
1271	-0.236158	0.299104	0.00710321	0.120279	0.197332	0.0248219	-0.0501854	-0.0118354	-0.157165	0.256465	-0.330341	-0.0729241	-0.0575887		-0.0561452	0.0247915	-0.0931413	0.169148
1272	-0.235725	0.299157	0.00690766	0.121083	0.196347	0.0247268	-0.0499315	-0.0120913	-0.157225	0.256971	-0.329566	-0.073543	-0.0563294		-0.0564009	0.0248685	-0.093374	0.167427
1273	-0.235299	0.299213	0.0067132	0.121892	0.195352	0.0246272	-0.0496785	-0.0123467	-0.157278	0.257467	-0.328792	-0.0741508	-0.0550718		-0.056671	0.0249509	-0.0936007	0.165698
1274	-0.23488	0.29927	0.00651993	0.122705	0.194348	0.024523	-0.0494267	-0.0126015	-0.157321	0.257954	-0.328019	-0.0747476	-0.0538158		-0.0569556	0.0250384	-0.0938213	0.163959
1275	-0.234469	0.299329	0.00632798	0.123521	0.193334	0.0244141	-0.0491764	-0.012855	-0.157357	0.258433	-0.327247	-0.0753334	-0.0525609		-0.0572548	0.025131	-0.0940357	0.16221
1276	-0.234065	0.299391	0.00613744	0.12434	0.192311	0.0243004	-0.0489279	-0.013107	-0.157384	0.258903	-0.326477	-0.0759083	-0.0513069		-0.0575685	0.0252287	-0.0942439	0.160451
1277	-0.233667	0.299456	0.00594838	0.125162	0.191279	0.0241817	-0.0486813	-0.013357	-0.157403	0.259364	-0.325708	-0.0764723	-0.0500535		-0.0578967	0.0253312	-0.0944457	0.158682
1278	-0.233277	0.299522	0.00576088	0.125986	0.190237	0.024058	-0.0484371	-0.0136045	-0.157414	0.259817	-0.324941	-0.0770255	-0.0488004		-0.0582395	0.0254384	-0.0946412	0.156901
1279	-0.232894	0.299592	0.005575	0.126811	0.189186	0.0239293	-0.0481954	-0.0138491	-0.157417	0.260261	-0.324176	-0.0775679	-0.0475471		-0.0585967	0.0255503	-0.0948302	0.155109
1280	-0.232518	0.299664	0.00539078	0.127638	0.188126	0.0237954	-0.0479565	-0.0140905	-0.157411	0.260698	-0.323412	-0.0780998	-0.0462934		-0.0589682	0.0256666	-0.0950128	0.153305
1281	-0.23215	0.299739	0.00520825	0.128465	0.187058	0.0236562	-0.0477207	-0.0143282	-0.157398	0.261127	-0.322651	-0.0786212	-0.0450387		-0.0593538	0.0257873	-0.0951888	0.151489
1282	-0.231788	0.299817	0.00502744	0.129293	0.18598	0.0235118	-0.0474883	-0.0145618	-0.157376	0.261548	-0.321891	-0.0791322	-0.0437827		-0.0597536	0.0259123	-0.0953583	0.149659
1283	-0.231433	0.299898	0.00484833	0.13012	0.184894	0.0233621	-0.0472595	-0.0147909	-0.157347	0.261961	-0.321134	-0.0796329	-0.0425249		-0.0601672	0.0260413	-0.0955212	0.147816
1284	-0.231086	0.299982	0.00467093	0.130946	0.183799	0.0232071	-0.0470346	-0.015015	-0.15731	0.262368	-0.320379	-0.0801235	-0.0412649		-0.0605944	0.0261743	-0.0956774	0.14596
1285	-0.230745	0.300069	0.0044952	0.131771	0.182696	0.0230466	-0.0468139	-0.0152338	-0.157266	0.262768	-0.319627	-0.0806041	-0.0400021		-0.061035	0.0263111	-0.0958271	0.144089
1286	-0.230411	0.30016	0.00432109	0.132594	0.181584	0.0228808	-0.0465975	-0.0154468	-0.157214	0.263161	-0.318876	-0.0810749	-0.038736		-0.0614888	0.0264515	-0.09597	0.142204
1287	-0.230084	0.300253	0.00414856	0.133415	0.180465	0.0227095	-0.0463858	-0.0156537	-0.157155	0.263547	-0.318129	-0.0815359	-0.037466		-0.0619555	0.0265955	-0.0961064	0.140305
1288	-0.229764	0.30035	0.00397752	0.134233	0.179337	0.0225328	-0.046179	-0.0158541	-0.157089	0.263928	-0.317384	-0.0819873	-0.0361914		-0.0624348	0.0267429	-0.096236	0.138391
1289	-0.22945	0.30045	0.00380788	0.135048	0.178201	0.0223506	-0.0459774	-0.0160475	-0.157016	0.264302	-0.316641	-0.0824291	-0.0349114		-0.0629263	0.0268934	-0.0963591	0.136462
1290	-0.229144	0.300554	0.00363954	0.13586	0.177057	0.0221629	-0.0457811	-0.0162336	-0.156937	0.264672	-0.315902	-0.0828616	-0.0336254		-0.0634298	0.027047	-0.0964755	0.134518
1291	-0.228843	0.300661	0.00347238	0.136667	0.175906	0.0219698	-0.0455904	-0.016412	-0.156851	0.265035	-0.315165	-0.0832849	-0.0323324		-0.0639449	0.0272036	-0.0965853	0.132559
1292	-0.22855	0.300771	0.00330627	0.13747	0.174748	0.0217711	-0.0454055	-0.0165824	-0.156758	0.265394	-0.314432	-0.083699	-0.0310317		-0.0644712	0.0273628	-0.0966885	0.130585
1293	-0.228263	0.300885	0.00314108	0.138269	0.173581	0.021567	-0.0452266	-0.0167442	-0.156659	0.265749	-0.313701	-0.0841041	-0.0297224		-0.0650083	0.0275245	-0.0967852	0.128596
1294	-0.227982	0.301003	0.00297665	0.139062	0.172408	0.0213575	-0.045054	-0.0168973	-0.156555	0.266099	-0.312974	-0.0845002	-0.0284034		-0.0655558	0.0276887	-0.0968753	0.126593
1295	-0.227707	0.301124	0.00281284	0.139849	0.171228	0.0211424	-0.0448878	-0.0170411	-0.156444	0.266445	-0.312251	-0.0848876	-0.0270739		-0.0661134	0.027855	-0.096959	0.124575
1296	-0.227439	0.301248	0.00264949	0.14063	0.17004	0.020922	-0.0447281	-0.0171753	-0.156328	0.266787	-0.311531	-0.0852664	-0.0257329		-0.0666805	0.0280233	-0.0970363	0.122542
1297	-0.227177	0.301376	0.00248643	0.141405	0.168846	0.0206962	-0.0445752	-0.0172997	-0.156207	0.267126	-0.310815	-0.0856365	-0.0243793		-0.0672569	0.0281934	-0.0971071	0.120497
1298	-0.22692	0.301508	0.0023235	0.142173	0.167645	0.020465	-0.0444292	-0.0174137	-0.15608	0.267462	-0.310103	-0.0859983	-0.0230123		-0.0678419	0.0283651	-0.0971717	0.118438
1299	-0.22667	0.301643	0.00216052	0.142934	0.166438	0.0202284	-0.0442903	-0.0175171	-0.155949	0.267795	-0.309396	-0.0863517	-0.0216308		-0.0684352	0.0285381	-0.09723	0.116367
1300	-0.226425	0.301782	0.00199731	0.143687	0.165225	0.0199866	-0.0441585	-0.0176096	-0.155812	0.268126	-0.308692	-0.0866969	-0.0202336		-0.0690363	0.0287122	-0.0972821	0.114284
1301	-0.226186	0.301924	0.00183369	0.144433	0.164005	0.0197396	-0.0440341	-0.0176907	-0.155671	0.268454	-0.307994	-0.087034	-0.0188198		-0.0696447	0.0288873	-0.0973281	0.11219
1302	-0.225952	0.302069	0.00166947	0.14517	0.16278	0.0194875	-0.043917	-0.0177602	-0.155526	0.268781	-0.307301	-0.0873632	-0.0173882		-0.0702599	0.029063	-0.097368	0.110086
1303	-0.225724	0.302218	0.00150444	0.145899	0.161549	0.0192303	-0.0438074	-0.0178178	-0.155376	0.269105	-0.306613	-0.0876845	-0.0159379		-0.0708815	0.0292391	-0.097402	0.107972
1304	-0.2255	0.30237	0.00133841	0.14662	0.160313	0.0189681	-0.0437054	-0.0178631	-0.155223	0.269429	-0.305931	-0.0879981	-0.0144677		-0.071509	0.0294154	-0.0974301	0.10585
1305	-0.225282	0.302526	0.00117116	0.147331	0.159071	0.018701	-0.043611	-0.0178958	-0.155065	0.269751	-0.305255	-0.088304	-0.0129767		-0.0721419	0.0295916	-0.0974524	0.10372
1306	-0.225069	0.302685	0.00100247	0.148032	0.157824	0.0184292	-0.0435243	-0.0179156	-0.154904	0.270073	-0.304586	-0.0886024	-0.0114638		-0.0727796	0.0297675	-0.0974689	0.101583
1307	-0.22486	0.302847	0.00083211	0.148724	0.156572	0.0181527	-0.0434453	-0.0179223	-0.15474	0.270394	-0.303923	-0.0888934	-0.00992801		-0.0734218	0.0299428	-0.0974798	0.0994409
1308	-0.224655	0.303012	0.00065986	0.149406	0.155315	0.0178717	-0.043374	-0.0179156	-0.154573	0.270715	-0.303268	-0.089177	-0.0083683		-0.0740679	0.0301172	-0.0974851	0.0972942
1309	-0.224455	0.30318	0.000485484	0.150078	0.154054	0.0175863	-0.0433105	-0.0178953	-0.154402	0.271035	-0.30262	-0.0894535	-0.0067837		-0.0747175	0.0302904	-0.097485	0.0951443
1310	-0.224259	0.303351	0.00030875	0.150739	0.152788	0.0172967	-0.0432546	-0.017861	-0.154229	0.271356	-0.30198	-0.0897229	-0.00517321		-0.07537	0.0304622	-0.0974794	0.0929924
1311	-0.224067	0.303525	0.000129424	0.15139	0.151519	0.0170029	-0.0432064	-0.0178127	-0.154054	0.271677	-0.301348	-0.0899853	-0.00353587		-0.0760252	0.0306322	-0.0974686	0.0908398
1312	-0.223879	0.303702	-5.27242e-05	0.15203	0.150245	0.0167053	-0.0431659	-0.01775	-0.153876	0.271998	-0.300726	-0.0902408	-0.00187075		-0.0766824	0.0308003	-0.0974525	0.0886877
1313	-0.223695	0.303881	-0.000237923	0.152659	0.148968	0.0164038	-0.0431329	-0.0176728	-0.153695	0.27232	-0.300112	-0.0904897	-0.000176912		-0.0773414	0.030966	-0.0974312	0.0865375
1314	-0.223513	0.304064	-0.000426401	0.153277	0.147687	0.0160987	-0.0431074	-0.017581	-0.153513	0.272642	-0.299509	-0.0907319	0.00154655		-0.0780016	0.0311291	-0.0974049	0.0843905
1315	-0.223336	0.304249	-0.000618382	0.153883	0.146403	0.0157902	-0.0430893	-0.0174743	-0.153329	0.272966	-0.298915	-0.0909677	0.00330052		-0.0786626	0.0312893	-0.0973736	0.0822481
1316	-0.223161	0.304436	-0.000814091	0.154478	0.145116	0.0154784	-0.0430785	-0.0173527	-0.153144	0.27329	-0.298332	-0.0911971	0.00508581		-0.079324	0.0314463	-0.0973374	0.0801117
1317	-0.222989	0.304626	-0.00101375	0.155062	0.143825	0.0151636	-0.0430748	-0.017216	-0.152957	0.273616	-0.29776	-0.0914203	0.0069032		-0.0799855	0.0315998	-0.0972964	0.0779826
1318	-0.222819	0.304818	-0.00121757	0.155634	0.142533	0.0148459	-0.0430782	-0.0170641	-0.152769	0.273943	-0.297199	-0.0916375	0.00875337		-0.0806467	0.0317494	-0.0972506	0.0758624
1319	-0.222652	0.305013	-0.00142577	0.156193	0.141237	0.0145256	-0.0430885	-0.0168969	-0.15258	0.274272	-0.296649	-0.0918488	0.0106369		-0.0813072	0.0318949	-0.0972001	0.0737523
1320	-0.222488	0.30521	-0.00163857	0.156741	0.13994	0.0142028	-0.0431055	-0.0167144	-0.15239	0.274601	-0.296112	-0.0920543	0.0125544		-0.0819666	0.0320359	-0.097145	0.0716539
1321	-0.222326	0.30541	-0.00185615	0.157277	0.13864	0.0138778	-0.0431289	-0.0165165	-0.1522	0.274933	-0.295587	-0.0922543	0.0145063		-0.0826247	0.0321722	-0.0970854	0.0695684
1322	-0.222165	0.305611	-0.00207874	0.157801	0.137339	0.0135507	-0.0431588	-0.0163031	-0.152009	0.275265	-0.295074	-0.0924489	0.016493		-0.0832809	0.0323034	-0.0970213	0.0674972
1323	-0.222007	0.305815	-0.00230652	0.158312	0.136036	0.0132218	-0.0431947	-0.0160744	-0.151818	0.2756	-0.294575	-0.0926382	0.0185147		-0.0839351	0.0324292	-0.0969528	0.0654418
1324	-0.22185	0.306021	-0.0025397	0.158811	0.134731	0.0128912	-0.0432366	-0.0158301	-0.151627	0.275936	-0.294089	-0.0928225	0.0205718		-0.0845869	0.0325493	-0.09688	0.0634034
1325	-0.221695	0.306229	-0.00277846	0.159298	0.133426	0.0125593	-0.0432842	-0.0155705	-0.151436	0.276273	-0.293617	-0.0930019	0.0226642		-0.0852361	0.0326635	-0.0968028	0.0613834
1326	-0.221541	0.306439	-0.003023	0.159773	0.132119	0.0122262	-0.0433372	-0.0152955	-0.151245	0.276612	-0.293159	-0.0931767	0.0247922		-0.0858822	0.0327715	-0.0967214	0.059383
1327	-0.221388	0.306651	-0.0032735	0.160235	0.130812	0.0118921	-0.0433955	-0.0150052	-0.151055	0.276953	-0.292715	-0.0933469	0.0269556		-0.086525	0.0328729	-0.0966358	0.0574036
1328	-0.221236	0.306866	-0.00353012	0.160684	0.129504	0.0115572	-0.0434587	-0.0146997	-0.150865	0.277295	-0.292286	-0.0935128	0.0291544		-0.0871643	0.0329676	-0.0965461	0.0554465
1329	-0.221085	0.307082	-0.00379303	0.161121	0.128196	0.0112218	-0.0435265	-0.0143792	-0.150676	0.277638	-0.291872	-0.0936746	0.0313885		-0.0877998	0.0330551	-0.0964522	0.0535129
1330	-0.220934	0.3073	-0.00406238	0.161546	0.126888	0.0108861	-0.0435988	-0.0140436	-0.150489	0.277983	-0.291473	-0.0938324	0.0336575		-0.0884312	0.0331354	-0.0963542	0.0516041
1331	-0.220784	0.30752	-0.00433833	0.161958	0.125579	0.0105503	-0.0436753	-0.0136932	-0.150302	0.278329	-0.29109	-0.0939865	0.0359613		-0.0890583	0.033208	-0.0962522	0.0497213
1332	-0.220635	0.307742	-0.004621	0.162358	0.124271	0.0102146	-0.0437555	-0.0133282	-0.150116	0.278676	-0.290722	-0.094137	0.0382995		-0.0896809	0.0332727	-0.0961461	0.0478658
1333	-0.220485	0.307966	-0.00491054	0.162745	0.122964	0.00987919	-0.0438393	-0.0129487	-0.149932	0.279023	-0.29037	-0.0942842	0.0406718		-0.0902988	0.0333294	-0.096036	0.0460388
1334	-0.220336	0.308192	-0.00520704	0.16312	0.121657	0.00954433	-0.0439263	-0.012555	-0.149749	0.279372	-0.290034	-0.0944282	0.0430777		-0.0909117	0.0333777	-0.095922	0.0442414
1335	-0.220186	0.308419	-0.00551063	0.163483	0.120351	0.00921022	-0.0440162	-0.0121473	-0.149568	0.279721	-0.289715	-0.0945694	0.0455168		-0.0915196	0.0334174	-0.095804	0.0424749
1336	-0.220036	0.308649	-0.00582139	0.163833	0.119047	0.0088771	-0.0441087	-0.0117258	-0.149389	0.280071	-0.289412	-0.0947078	0.0479885		-0.0921222	0.0334484	-0.0956821	0.0407404
1337	-0.219886	0.30888	-0.0061394	0.164171	0.117744	0.00854517	-0.0442034	-0.0112908	-0.149212	0.280421	-0.289125	-0.0948437	0.0504922		-0.0927194	0.0334704	-0.0955563	0.0390391
1338	-0.219735	0.309113	-0.00646474	0.164497	0.116442	0.00821467	-0.0443	-0.0108426	-0.149037	0.280771	-0.288856	-0.0949773	0.0530273		-0.0933111	0.0334832	-0.0954267	0.037372
1339	-0.219583	0.309349	-0.00679745	0.16481	0.115143	0.00788583	-0.0443981	-0.0103815	-0.148865	0.281121	-0.288603	-0.0951089	0.0555931		-0.0938971	0.0334866	-0.0952931	0.0357401
1340	-0.219431	0.309585	-0.00713759	0.165112	0.113845	0.00755888	-0.0444974	-0.00990785	-0.148694	0.28147	-0.288367	-0.0952386	0.0581889		-0.0944773	0.0334804	-0.0951558	0.0341446
1341	-0.219278	0.309824	-0.00748519	0.165401	0.11255	0.00723404	-0.0445975	-0.00942199	-0.148527	0.28182	-0.288149	-0.0953667	0.0608139		-0.0950517	0.0334646	-0.0950146	0.0325864
1342	-0.219124	0.310065	-0.00784026	0.165679	0.111258	0.00691156	-0.0446981	-0.00892428	-0.148362	0.282168	-0.287947	-0.0954933	0.0634673		-0.0956202	0.033439	-0.0948696	0.0310664
1343	-0.218969	0.310307	-0.00820281	0.165944	0.109968	0.00659168	-0.0447987	-0.0084151	-0.148199	0.282516	-0.287763	-0.0956187	0.066148		-0.0961827	0.0334033	-0.0947209	0.0295856
1344	-0.218813	0.310552	-0.00857284	0.166198	0.108682	0.00627463	-0.044899	-0.00789487	-0.14804	0.282862	-0.287596	-0.0957431	0.0688553		-0.0967392	0.0333576	-0.0945684	0.028145
1345	-0.218656	0.310798	-0.00895033	0.16644	0.107399	0.00596065	-0.0449986	-0.00736399	-0.147884	0.283208	-0.287446	-0.0958666	0.0715879		-0.0972896	0.0333018	-0.0944121	0.0267453
1346	-0.218499	0.311046	-0.00933525	0.166671	0.10612	0.00564999	-0.0450971	-0.00682291	-0.147731	0.283552	-0.287313	-0.0959895	0.0743449		-0.097834	0.0332356	-0.0942522	0.0253876
1347	-0.21834	0.311296	-0.00972757	0.16689	0.104845	0.00534289	-0.0451942	-0.00627208	-0.147582	0.283894	-0.287197	-0.0961119	0.0771251		-0.0983723	0.0331592	-0.0940886	0.0240725
1348	-0.218179	0.311548	-0.0101272	0.167098	0.103574	0.00503959	-0.0452894	-0.00571197	-0.147436	0.284234	-0.287097	-0.0962341	0.0799273		-0.0989045	0.0330723	-0.0939214	0.022801
1349	-0.218018	0.311803	-0.0105342	0.167295	0.102308	0.00474033	-0.0453823	-0.00514306	-0.147293	0.284572	-0.287015	-0.0963561	0.0827503		-0.0994307	0.032975	-0.0937507	0.0215737
1350	-0.217856	0.312059	-0.0109483	0.16748	0.101046	0.00444536	-0.0454726	-0.00456585	-0.147155	0.284908	-0.286948	-0.0964782	0.0855927		-0.0999509	0.0328672	-0.0935763	0.0203914
1351	-0.217693	0.312317	-0.0113696	0.167654	0.0997895	0.00415493	-0.0455599	-0.00398084	-0.14702	0.285241	-0.286898	-0.0966006	0.0884532		-0.100465	0.0327489	-0.0933985	0.0192549
1352	-0.217528	0.312578	-0.011798	0.167818	0.0985384	0.00386929	-0.0456437	-0.00338855	-0.14689	0.285572	-0.286863	-0.0967234	0.0913303		-0.100973	0.0326202	-0.0932172	0.0181649
1353	-0.217363	0.312841	-0.0122333	0.16797	0.097293	0.00358869	-0.0457236	-0.00278951	-0.146763	0.2859	-0.286844	-0.0968467	0.0942225		-0.101476	0.032481	-0.0930325	0.0171222
1354	-0.217197	0.313107	-0.0126755	0.168112	0.0960535	0.00331338	-0.0457993	-0.00218427	-0.146642	0.286225	-0.28684	-0.0969709	0.0971282		-0.101973	0.0323314	-0.0928444	0.0161275
1355	-0.21703	0.313375	-0.0131245	0.168244	0.0948203	0.00304361	-0.0458703	-0.00157336	-0.146524	0.286546	-0.286851	-0.0970959	0.100046		-0.102464	0.0321715	-0.0926531	0.0151815
1356	-0.216862	0.313646	-0.0135801	0.168365	0.0935935	0.00277964	-0.0459363	-0.000957335	-0.146412	0.286864	-0.286875	-0.0972219	0.102974		-0.102949	0.0320012	-0.0924585	0.0142848
1357	-0.216693	0.313919	-0.0140423	0.168475	0.0923735	0.00252172	-0.0459968	-0.000336764	-0.146304	0.287178	-0.286913	-0.0973491	0.105911		-0.103429	0.0318206	-0.0922606	0.013438
1358	-0.216524	0.314195	-0.014511	0.168576	0.0911605	0.00227007	-0.0460514	0.000287793	-0.146202	0.287489	-0.286964	-0.0974776	0.108855		-0.103903	0.03163	-0.0920597	0.0126416
1359	-0.216355	0.314474	-0.014986	0.168666	0.0899549	0.00202493	-0.0460998	0.000915769	-0.146104	0.287795	-0.287028	-0.0976076	0.111805		-0.104372	0.0314292	-0.0918557	0.011896
1360	-0.216185	0.314756	-0.0154672	0.168747	0.0887567	0.00178653	-0.0461416	0.00154659	-0.146012	0.288098	-0.287103	-0.0977392	0.114759		-0.104836	0.0312185	-0.0916487	0.0112017
1361	-0.216015	0.315041	-0.0159545	0.168817	0.0875662	0.00155507	-0.0461763	0.0021797	-0.145926	0.288395	-0.287188	-0.0978724	0.117715		-0.105294	0.030998	-0.0914387	0.010559
1362	-0.215845	0.315329	-0.0164477	0.168878	0.0863837	0.00133075	-0.0462037	0.00281451	-0.145845	0.288689	-0.287285	-0.0980074	0.120672		-0.105747	0.0307677	-0.0912259	0.00996785
1363	-0.215676	0.31562	-0.0169468	0.16893	0.0852094	0.00111378	-0.0462233	0.00345046	-0.145771	0.288978	-0.28739	-0.0981443	0.123629		-0.106195	0.0305279	-0.0910103	0.00942848
1364	-0.215506	0.315915	-0.0174515	0.168972	0.0840434	0.000904323	-0.0462348	0.00408698	-0.145702	0.289262	-0.287504	-0.0982832	0.126583		-0.106638	0.0302787	-0.0907921	0.00894081
1365	-0.215337	0.316212	-0.0179618	0.169005	0.0828859	0.000702561	-0.0462379	0.0047235	-0.14564	0.289541	-0.287626	-0.0984242	0.129534		-0.107076	0.0300202	-0.0905711	0.00850469
1366	-0.215169	0.316513	-0.0184775	0.169029	0.0817372	0.00050865	-0.0462323	0.00535945	-0.145584	0.289814	-0.287755	-0.0985673	0.132479		-0.10751	0.0297527	-0.0903477	0.00811989
1367	-0.215002	0.316818	-0.0189985	0.169044	0.0805974	0.000322737	-0.0462175	0.00599427	-0.145534	0.290083	-0.287891	-0.0987127	0.135417		-0.107938	0.0294763	-0.0901218	0.00778609
1368	-0.214836	0.317125	-0.0195246	0.16905	0.0794667	0.000144959	-0.0461934	0.0066274	-0.145491	0.290346	-0.288031	-0.0988603	0.138346		-0.108362	0.0291913	-0.0898935	0.00750288
1369	-0.214672	0.317436	-0.0200556	0.169048	0.0783452	-2.45601e-05	-0.0461595	0.00725828	-0.145455	0.290604	-0.288176	-0.0990103	0.141266		-0.108782	0.0288978	-0.0896629	0.00726977
1370	-0.214509	0.317751	-0.0205915	0.169037	0.077233	-0.00018571	-0.0461156	0.00788638	-0.145427	0.290856	-0.288324	-0.0991626	0.144174		-0.109197	0.0285962	-0.08943	0.00708617
1371	-0.214347	0.318069	-0.0211321	0.169018	0.0761303	-0.000338393	-0.0460614	0.00851114	-0.145405	0.291103	-0.288475	-0.0993174	0.147069		-0.109607	0.0282866	-0.089195	0.00695138
1372	-0.214188	0.31839	-0.0216772	0.168992	0.0750372	-0.000482526	-0.0459966	0.00913205	-0.14539	0.291343	-0.288627	-0.0994747	0.14995		-0.110013	0.0279692	-0.0889579	0.00686462
1373	-0.214032	0.318715	-0.0222267	0.168957	0.0739537	-0.000618037	-0.045921	0.00974857	-0.145383	0.291578	-0.28878	-0.0996345	0.152815		-0.110415	0.0276445	-0.0887188	0.006825
1374	-0.213878	0.319043	-0.0227805	0.168916	0.0728799	-0.000744869	-0.0458344	0.0103602	-0.145384	0.291806	-0.288933	-0.0997969	0.155664		-0.110813	0.0273125	-0.0884777	0.00683153
1375	-0.213726	0.319375	-0.0233383	0.168866	0.0718159	-0.000862978	-0.0457365	0.0109665	-0.145392	0.292028	-0.289085	-0.0999618	0.158493		-0.111207	0.0269737	-0.0882347	0.00688313
1376	-0.213578	0.31971	-0.0239	0.16881	0.0707616	-0.000972332	-0.0456271	0.0115668	-0.145407	0.292244	-0.289234	-0.100129	0.161303		-0.111597	0.0266283	-0.08799	0.0069786
1377	-0.213433	0.320048	-0.0244655	0.168747	0.0697171	-0.00107291	-0.045506	0.0121609	-0.145431	0.292454	-0.289381	-0.100299	0.164092		-0.111984	0.0262766	-0.0877435	0.00711668
1378	-0.213292	0.32039	-0.0250346	0.168677	0.0686824	-0.0011647	-0.045373	0.0127481	-0.145462	0.292657	-0.289524	-0.100472	0.166858		-0.112366	0.025919	-0.0874953	0.007296
1379	-0.213154	0.320735	-0.0256071	0.168601	0.0676573	-0.00124772	-0.0452281	0.0133281	-0.145502	0.292853	-0.289663	-0.100647	0.1696		-0.112745	0.0255558	-0.0872455	0.00751517
1380	-0.21302	0.321083	-0.026183	0.168518	0.0666419	-0.00132197	-0.0450709	0.0139004	-0.145549	0.293043	-0.289795	-0.100825	0.172317		-0.11312	0.0251874	-0.0869941	0.00777271
1381	-0.212891	0.321435	-0.0267621	0.16843	0.065636	-0.00138748	-0.0449015	0.0144646	-0.145605	0.293226	-0.289922	-0.101005	0.175008		-0.113492	0.024814	-0.0867413	0.0080671
1382	-0.212766	0.321789	-0.0273442	0.168336	0.0646396	-0.0014443	-0.0447197	0.0150203	-0.145669	0.293403	-0.290041	-0.101187	0.17767		-0.11386	0.0244362	-0.086487	0.00839679
1383	-0.212645	0.322147	-0.0279291	0.168236	0.0636524	-0.00149247	-0.0445254	0.0155671	-0.145742	0.293572	-0.290152	-0.101372	0.180303		-0.114226	0.0240542	-0.0862313	0.00876022
1384	-0.21253	0.322508	-0.0285168	0.168131	0.0626744	-0.00153205	-0.0443186	0.0161045	-0.145823	0.293735	-0.290255	-0.101559	0.182906		-0.114587	0.0236685	-0.0859743	0.0091558
1385	-0.212419	0.322872	-0.0291071	0.168021	0.0617054	-0.00156313	-0.0440991	0.0166324	-0.145912	0.29389	-0.290348	-0.101749	0.185477		-0.114946	0.0232794	-0.0857161	0.00958191
1386	-0.212313	0.32324	-0.0296999	0.167907	0.0607452	-0.00158579	-0.043867	0.0171502	-0.14601	0.294039	-0.29043	-0.10194	0.188015		-0.115301	0.0228873	-0.0854567	0.010037
1387	-0.212213	0.32361	-0.0302949	0.167788	0.0597936	-0.00160013	-0.0436222	0.0176577	-0.146116	0.29418	-0.290501	-0.102134	0.19052		-0.115654	0.0224927	-0.0851961	0.0105193
1388	-0.212119	0.323982	-0.0308922	0.167665	0.0588503	-0.00160626	-0.0433646	0.0181546	-0.146232	0.294315	-0.290561	-0.102329	0.19299		-0.116003	0.0220959	-0.0849344	0.0110272
1389	-0.21203	0.324358	-0.0314915	0.167538	0.0579151	-0.00160432	-0.0430944	0.0186405	-0.146355	0.294442	-0.290608	-0.102526	0.195424		-0.11635	0.0216973	-0.0846716	0.011559
1390	-0.211948	0.324736	-0.0320927	0.167407	0.0569878	-0.00159444	-0.0428114	0.0191153	-0.146488	0.294562	-0.290641	-0.102725	0.197821		-0.116693	0.0212973	-0.0844077	0.0121129
1391	-0.211871	0.325116	-0.0326956	0.167273	0.0560679	-0.00157678	-0.0425158	0.0195785	-0.14663	0.294675	-0.290661	-0.102925	0.200181		-0.117035	0.0208963	-0.0841429	0.0126873
1392	-0.2118	0.325499	-0.0333002	0.167136	0.0551553	-0.0015515	-0.0422075	0.02003	-0.14678	0.294781	-0.290667	-0.103127	0.202503		-0.117373	0.0204948	-0.0838771	0.0132802
1393	-0.211736	0.325885	-0.0339063	0.166996	0.0542496	-0.00151877	-0.0418867	0.0204696	-0.146939	0.294879	-0.290657	-0.10333	0.204785		-0.117709	0.0200931	-0.0836103	0.01389
1394	-0.211679	0.326272	-0.0345137	0.166854	0.0533504	-0.00147879	-0.0415533	0.020897	-0.147107	0.29497	-0.290632	-0.103534	0.207028		-0.118043	0.0196916	-0.0833426	0.0145147
1395	-0.211628	0.326662	-0.0351224	0.16671	0.0524575	-0.00143175	-0.0412075	0.021312	-0.147284	0.295054	-0.29059	-0.103739	0.20923		-0.118374	0.0192907	-0.0830739	0.0151527
1396	-0.211584	0.327053	-0.0357323	0.166564	0.0515704	-0.00137787	-0.0408494	0.0217146	-0.14747	0.29513	-0.290532	-0.103944	0.211392		-0.118703	0.0188908	-0.0828044	0.0158022
1397	-0.211547	0.327446	-0.0363432	0.166416	0.0506887	-0.00131734	-0.040479	0.0221044	-0.147665	0.295198	-0.290457	-0.104151	0.213512		-0.119031	0.0184922	-0.0825339	0.0164614
1398	-0.211518	0.327841	-0.0369551	0.166267	0.0498122	-0.0012504	-0.0400965	0.0224815	-0.147869	0.29526	-0.290364	-0.104357	0.215589		-0.119356	0.0180952	-0.0822625	0.0171288
1399	-0.211495	0.328237	-0.0375678	0.166117	0.0489404	-0.00117728	-0.0397021	0.0228456	-0.148082	0.295313	-0.290253	-0.104564	0.217624		-0.11968	0.0177003	-0.0819903	0.0178028
1400	-0.211479	0.328635	-0.0381812	0.165966	0.0480728	-0.0010982	-0.0392958	0.0231966	-0.148304	0.295359	-0.290124	-0.104771	0.219617		-0.120003	0.0173078	-0.0817171	0.0184818
1401	-0.211471	0.329034	-0.0387954	0.165815	0.0472092	-0.00101341	-0.0388778	0.0235346	-0.148535	0.295398	-0.289976	-0.104978	0.221565		-0.120324	0.0169179	-0.0814431	0.0191644
1402	-0.211471	0.329433	-0.0394101	0.165664	0.0463491	-0.000923155	-0.0384484	0.0238594	-0.148775	0.295429	-0.289809	-0.105185	0.22347		-0.120643	0.0165311	-0.0811682	0.0198493
1403	-0.211478	0.329834	-0.0400254	0.165513	0.0454921	-0.000827705	-0.0380076	0.0241709	-0.149024	0.295452	-0.289623	-0.105391	0.225331		-0.120962	0.0161475	-0.0808924	0.0205351
1404	-0.211492	0.330236	-0.0406411	0.165362	0.0446378	-0.000727323	-0.0375558	0.0244692	-0.149281	0.295467	-0.289417	-0.105598	0.227148		-0.12128	0.0157675	-0.0806156	0.0212207
1405	-0.211514	0.330638	-0.0412573	0.165212	0.0437858	-0.000622286	-0.037093	0.0247542	-0.149548	0.295474	-0.289191	-0.105803	0.228921		-0.121597	0.0153913	-0.080338	0.021905
1406	-0.211544	0.33104	-0.0418737	0.165063	0.0429356	-0.000512878	-0.0366196	0.0250259	-0.149823	0.295474	-0.288944	-0.106008	0.23065		-0.121914	0.0150193	-0.0800594	0.0225868
1407	-0.211582	0.331443	-0.0424904	0.164916	0.0420869	-0.000399388	-0.0361357	0.0252844	-0.150107	0.295466	-0.288678	-0.106212	0.232335		-0.122231	0.0146516	-0.0797798	0.0232651
1408	-0.211627	0.331846	-0.0431072	0.16477	0.0412392	-0.000282114	-0.0356417	0.0255297	-0.150399	0.29545	-0.288391	-0.106415	0.233976		-0.122547	0.0142886	-0.0794992	0.0239391
1409	-0.21168	0.332249	-0.0437242	0.164626	0.0403922	-0.000161359	-0.0351377	0.0257619	-0.1507	0.295426	-0.288083	-0.106616	0.235573		-0.122864	0.0139305	-0.0792177	0.0246079
1410	-0.211741	0.332652	-0.0443412	0.164483	0.0395454	-3.7433e-05	-0.0346241	0.025981	-0.151009	0.295394	-0.287754	-0.106817	0.237126		-0.123181	0.0135775	-0.0789351	0.0252707
1411	-0.21181	0.333054	-0.0449582	0.164343	0.0386985	8.93515e-05	-0.0341012	0.0261871	-0.151327	0.295353	-0.287405	-0.107017	0.238637		-0.123499	0.0132299	-0.0786514	0.0259267
1412	-0.211887	0.333456	-0.0455751	0.164206	0.0378511	0.000218677	-0.0335691	0.0263802	-0.151652	0.295305	-0.287034	-0.107215	0.240104		-0.123817	0.0128878	-0.0783667	0.0265754
1413	-0.211971	0.333858	-0.0461919	0.164071	0.0370028	0.000350222	-0.0330283	0.0265606	-0.151986	0.295248	-0.286642	-0.107411	0.241529		-0.124137	0.0125515	-0.0780808	0.0272161
1414	-0.212063	0.334258	-0.0468084	0.163939	0.0361532	0.000483663	-0.032479	0.0267284	-0.152327	0.295184	-0.286229	-0.107607	0.242913		-0.124458	0.0122212	-0.0777938	0.0278481
1415	-0.212163	0.334658	-0.0474246	0.16381	0.0353019	0.000618672	-0.0319215	0.0268836	-0.152676	0.29511	-0.285795	-0.1078	0.244255		-0.12478	0.0118971	-0.0775056	0.0284712
1416	-0.212271	0.335056	-0.0480404	0.163684	0.0344486	0.000754922	-0.0313563	0.0270265	-0.153033	0.295029	-0.285339	-0.107992	0.245556		-0.125105	0.0115794	-0.0772161	0.0290846
1417	-0.212387	0.335454	-0.0486558	0.163562	0.033593	0.000892084	-0.0307835	0.0271571	-0.153397	0.294939	-0.284863	-0.108183	0.246817		-0.125431	0.0112683	-0.0769255	0.0296881
1418	-0.21251	0.335849	-0.0492706	0.163443	0.0327347	0.00102983	-0.0302036	0.0272758	-0.153768	0.29484	-0.284365	-0.108371	0.248038		-0.12576	0.0109639	-0.0766335	0.0302812
1419	-0.21264	0.336244	-0.0498848	0.163327	0.0318735	0.00116784	-0.0296169	0.0273826	-0.154147	0.294733	-0.283846	-0.108558	0.249221		-0.126091	0.0106664	-0.0763403	0.0308635
1420	-0.212778	0.336636	-0.0504983	0.163216	0.031009	0.00130578	-0.0290237	0.0274778	-0.154531	0.294618	-0.283305	-0.108743	0.250366		-0.126424	0.010376	-0.0760458	0.0314347
1421	-0.212924	0.337027	-0.051111	0.163108	0.030141	0.00144333	-0.0284245	0.0275616	-0.154923	0.294493	-0.282744	-0.108925	0.251474		-0.126761	0.0100927	-0.0757499	0.0319945
1422	-0.213077	0.337416	-0.0517227	0.163004	0.0292692	0.00158017	-0.0278195	0.0276342	-0.155321	0.29436	-0.282161	-0.109106	0.252546		-0.127101	0.0098168	-0.0754527	0.0325425
1423	-0.213236	0.337803	-0.0523335	0.162904	0.0283934	0.00171598	-0.0272092	0.0276958	-0.155725	0.294218	-0.281558	-0.109285	0.253582		-0.127444	0.0095483	-0.0751541	0.0330786
1424	-0.213403	0.338187	-0.0529432	0.162808	0.0275133	0.00185045	-0.0265939	0.0277467	-0.156135	0.294067	-0.280934	-0.109462	0.254584		-0.12779	0.00928733	-0.074854	0.0336025
1425	-0.213577	0.338569	-0.0535517	0.162717	0.0266288	0.00198326	-0.0259741	0.027787	-0.15655	0.293907	-0.280289	-0.109637	0.255552		-0.12814	0.00903397	-0.0745526	0.034114
1426	-0.213758	0.338949	-0.0541588	0.162629	0.0257397	0.00211411	-0.0253501	0.0278171	-0.156971	0.293738	-0.279623	-0.10981	0.256487		-0.128494	0.00878829	-0.0742497	0.0346131
1427	-0.213945	0.339326	-0.0547646	0.162546	0.0248457	0.00224269	-0.0247224	0.0278373	-0.157398	0.293559	-0.278937	-0.109982	0.257391		-0.128852	0.00855036	-0.0739454	0.0350997
1428	-0.214139	0.3397	-0.0553688	0.162467	0.0239467	0.00236869	-0.0240914	0.0278477	-0.157829	0.293371	-0.27823	-0.110151	0.258265		-0.129214	0.00832021	-0.0736395	0.0355738
1429	-0.214339	0.340071	-0.0559713	0.162392	0.0230427	0.00249184	-0.0234575	0.0278487	-0.158265	0.293174	-0.277503	-0.110318	0.259109		-0.12958	0.00809787	-0.0733323	0.0360354
1430	-0.214546	0.340439	-0.0565722	0.162321	0.0221333	0.00261183	-0.022821	0.0278405	-0.158705	0.292967	-0.276757	-0.110484	0.259924		-0.129951	0.00788335	-0.0730235	0.0364845
1431	-0.214758	0.340804	-0.0571711	0.162254	0.0212186	0.00272839	-0.0221825	0.0278234	-0.159149	0.29275	-0.275991	-0.110648	0.260712		-0.130326	0.00767667	-0.0727132	0.0369211
1432	-0.214976	0.341166	-0.057768	0.162191	0.0202985	0.00284124	-0.0215423	0.0277978	-0.159598	0.292524	-0.275206	-0.11081	0.261474		-0.130706	0.0074778	-0.0724015	0.0373453
1433	-0.2152	0.341525	-0.0583628	0.162132	0.0193727	0.00295012	-0.0209009	0.0277639	-0.16005	0.292287	-0.274402	-0.110971	0.262212		-0.13109	0.00728672	-0.0720882	0.0377572
1434	-0.215429	0.34188	-0.0589553	0.162077	0.0184414	0.00305475	-0.0202588	0.0277219	-0.160506	0.292041	-0.273579	-0.11113	0.262925		-0.13148	0.0071034	-0.0717735	0.0381567
1435	-0.215664	0.342231	-0.0595456	0.162025	0.0175045	0.0031549	-0.0196162	0.0276723	-0.160964	0.291785	-0.272739	-0.111288	0.263616		-0.131874	0.00692777	-0.0714574	0.038544
1436	-0.215903	0.342578	-0.0601333	0.161977	0.0165619	0.00325029	-0.0189738	0.0276152	-0.161426	0.291519	-0.271881	-0.111445	0.264286		-0.132273	0.00675978	-0.0711398	0.038919
1437	-0.216147	0.342921	-0.0607185	0.161933	0.0156137	0.0033407	-0.0183318	0.0275511	-0.16189	0.291242	-0.271005	-0.111601	0.264936		-0.132678	0.00659933	-0.0708208	0.039282
1438	-0.216396	0.34326	-0.061301	0.161891	0.0146598	0.00342589	-0.0176908	0.0274802	-0.162357	0.290955	-0.270113	-0.111757	0.265568		-0.133087	0.00644634	-0.0705003	0.039633
1439	-0.21665	0.343595	-0.0618807	0.161852	0.0137004	0.00350562	-0.0170513	0.0274028	-0.162826	0.290658	-0.269205	-0.111911	0.266183		-0.133502	0.00630068	-0.0701785	0.039972
1440	-0.216907	0.343925	-0.0624575	0.161816	0.0127355	0.00357969	-0.0164136	0.0273191	-0.163296	0.29035	-0.268282	-0.112065	0.266781		-0.133921	0.00616225	-0.0698554	0.0402992
1441	-0.217169	0.344251	-0.0630313	0.161783	0.0117651	0.00364789	-0.0157782	0.0272296	-0.163769	0.290031	-0.267343	-0.112219	0.267366		-0.134346	0.00603091	-0.069531	0.0406146
1442	-0.217434	0.344572	-0.0636021	0.161752	0.0107894	0.00371003	-0.0151455	0.0271345	-0.164242	0.289702	-0.266391	-0.112373	0.267937		-0.134776	0.00590652	-0.0692052	0.0409183
1443	-0.217703	0.344889	-0.0641697	0.161722	0.00980852	0.00376591	-0.0145161	0.027034	-0.164717	0.289362	-0.265424	-0.112527	0.268498		-0.13521	0.00578893	-0.0688783	0.0412104
1444	-0.217976	0.3452	-0.0647342	0.161694	0.00882255	0.00381536	-0.0138903	0.0269285	-0.165192	0.289012	-0.264444	-0.112681	0.269048		-0.135649	0.00567798	-0.0685502	0.0414909
1445	-0.218252	0.345506	-0.0652954	0.161668	0.00783164	0.00385822	-0.0132687	0.0268183	-0.165668	0.28865	-0.263452	-0.112836	0.269589		-0.136093	0.00557348	-0.068221	0.04176
1446	-0.21853	0.345807	-0.0658533	0.161642	0.00683597	0.00389434	-0.0126516	0.0267035	-0.166145	0.288278	-0.262448	-0.112992	0.270123		-0.136541	0.00547526	-0.0678908	0.0420175
1447	-0.218812	0.346103	-0.0664078	0.161617	0.00583568	0.00392357	-0.0120395	0.0265846	-0.166621	0.287895	-0.261433	-0.113149	0.270651		-0.136994	0.00538311	-0.0675595	0.0422636
1448	-0.219097	0.346392	-0.066959	0.161592	0.00483096	0.00394576	-0.0114329	0.0264618	-0.167098	0.287501	-0.260408	-0.113308	0.271175		-0.13745	0.00529682	-0.0672273	0.0424984
1449	-0.219384	0.346677	-0.0675068	0.161567	0.00382198	0.00396078	-0.0108322	0.0263353	-0.167573	0.287096	-0.259372	-0.113469	0.271696		-0.137911	0.00521619	-0.0668942	0.0427218
1450	-0.219673	0.346955	-0.0680513	0.161542	0.00280896	0.00396853	-0.010238	0.0262054	-0.168049	0.28668	-0.258329	-0.113631	0.272215		-0.138374	0.00514098	-0.0665602	0.042934
1451	-0.219965	0.347228	-0.0685925	0.161515	0.00179207	0.00396886	-0.00965056	0.0260723	-0.168523	0.286253	-0.257277	-0.113796	0.272734		-0.138841	0.00507095	-0.0662255	0.0431351
1452	-0.220259	0.347495	-0.0691303	0.161487	0.000771525	0.00396168	-0.00907047	0.0259364	-0.168996	0.285816	-0.256217	-0.113964	0.273254		-0.139311	0.00500588	-0.0658901	0.0433251
1453	-0.220555	0.347755	-0.0696648	0.161457	-0.000252463	0.00394689	-0.00849816	0.0257979	-0.169468	0.285367	-0.255151	-0.114135	0.273777		-0.139784	0.00494552	-0.0655541	0.0435042
1454	-0.220853	0.348009	-0.0701961	0.161425	-0.00127969	0.00392437	-0.00793407	0.0256571	-0.169938	0.284907	-0.25408	-0.114309	0.274304		-0.140259	0.00488961	-0.0652175	0.0436726
1455	-0.221152	0.348257	-0.0707242	0.16139	-0.00230993	0.00389405	-0.00737866	0.0255142	-0.170406	0.284436	-0.253004	-0.114488	0.274836		-0.140737	0.00483792	-0.0648803	0.0438302
1456	-0.221454	0.348499	-0.0712491	0.161352	-0.00334298	0.00385584	-0.00683238	0.0253695	-0.170872	0.283954	-0.251924	-0.11467	0.275375		-0.141216	0.00479016	-0.0645428	0.0439774
1457	-0.221756	0.348734	-0.0717709	0.161311	-0.00437863	0.00380966	-0.00629568	0.0252232	-0.171336	0.283461	-0.25084	-0.114857	0.275922		-0.141697	0.00474609	-0.0642048	0.0441143
1458	-0.22206	0.348962	-0.0722896	0.161266	-0.00541667	0.00375545	-0.00576899	0.0250757	-0.171797	0.282958	-0.249755	-0.115049	0.276478		-0.142179	0.00470543	-0.0638665	0.0442411
1459	-0.222366	0.349184	-0.0728052	0.161216	-0.00645687	0.00369315	-0.00525276	0.0249272	-0.172254	0.282443	-0.248668	-0.115246	0.277044		-0.142661	0.0046679	-0.0635279	0.0443579
1460	-0.222672	0.349399	-0.073318	0.161161	-0.00749903	0.0036227	-0.00474739	0.0247778	-0.172709	0.281918	-0.24758	-0.115448	0.277622		-0.143145	0.00463322	-0.0631891	0.044465
1461	-0.222979	0.349606	-0.0738278	0.161101	-0.00854294	0.00354408	-0.00425331	0.024628	-0.17316	0.281382	-0.246493	-0.115657	0.278213		-0.143628	0.00460111	-0.0628501	0.0445625
1462	-0.223288	0.349807	-0.0743349	0.161035	-0.00958837	0.00345724	-0.00377092	0.024478	-0.173607	0.280835	-0.245406	-0.115872	0.278819		-0.144112	0.00457127	-0.062511	0.0446507
1463	-0.223597	0.350001	-0.0748391	0.160963	-0.0106351	0.00336217	-0.00330061	0.0243279	-0.174051	0.280277	-0.244321	-0.116094	0.27944		-0.144595	0.00454341	-0.0621719	0.0447297
1464	-0.223906	0.350188	-0.0753407	0.160884	-0.011683	0.00325885	-0.00284276	0.0241781	-0.17449	0.279709	-0.243239	-0.116323	0.280078		-0.145077	0.00451722	-0.0618328	0.0447998
1465	-0.224216	0.350368	-0.0758397	0.160798	-0.0127317	0.00314727	-0.00239774	0.0240289	-0.174924	0.27913	-0.242161	-0.116559	0.280733		-0.145558	0.0044924	-0.0614937	0.0448613
1466	-0.224526	0.350541	-0.0763362	0.160705	-0.0137811	0.00302744	-0.0019659	0.0238804	-0.175354	0.27854	-0.241086	-0.116804	0.281408		-0.146037	0.00446865	-0.0611548	0.0449144
1467	-0.224836	0.350706	-0.0768302	0.160603	-0.0148309	0.00289936	-0.00154759	0.0237329	-0.175778	0.277941	-0.240017	-0.117056	0.282102		-0.146515	0.00444564	-0.0608161	0.0449593
1468	-0.225146	0.350864	-0.0773219	0.160493	-0.015881	0.00276306	-0.00114314	0.0235866	-0.176197	0.27733	-0.238953	-0.117317	0.282818		-0.14699	0.00442307	-0.0604777	0.0449962
1469	-0.225456	0.351014	-0.0778113	0.160374	-0.016931	0.00261857	-0.000752853	0.0234419	-0.17661	0.27671	-0.237896	-0.117587	0.283556		-0.147463	0.00440062	-0.0601395	0.0450254
1470	-0.225765	0.351157	-0.0782986	0.160246	-0.0179809	0.00246593	-0.000377013	0.0232988	-0.177018	0.27608	-0.236845	-0.117866	0.284317		-0.147932	0.00437798	-0.0598018	0.0450472
1471	-0.226073	0.351293	-0.0787838	0.160109	-0.0190303	0.00230519	-1.58914e-05	0.0231577	-0.177419	0.275439	-0.235803	-0.118154	0.285102		-0.148398	0.00435483	-0.0594646	0.0450618
1472	-0.226381	0.35142	-0.0792671	0.159962	-0.0200791	0.00213641	0.000330265	0.0230188	-0.177814	0.274788	-0.234768	-0.118453	0.285912		-0.148861	0.00433083	-0.0591279	0.0450695
1473	-0.226687	0.351541	-0.0797485	0.159804	-0.0211271	0.00195966	0.000661231	0.0228822	-0.178202	0.274128	-0.233743	-0.118761	0.286748		-0.14932	0.00430568	-0.0587918	0.0450705
1474	-0.226992	0.351653	-0.0802282	0.159636	-0.0221739	0.00177502	0.000976797	0.0227483	-0.178584	0.273457	-0.232727	-0.11908	0.28761		-0.149774	0.00427903	-0.0584564	0.045065
1475	-0.227296	0.351758	-0.0807062	0.159457	-0.0232194	0.00158258	0.00127678	0.022617	-0.178958	0.272777	-0.231721	-0.11941	0.288501		-0.150224	0.00425057	-0.0581218	0.0450534
1476	-0.227597	0.351855	-0.0811828	0.159267	-0.0242635	0.00138244	0.00156101	0.0224888	-0.179325	0.272087	-0.230725	-0.119751	0.289419		-0.150669	0.00421996	-0.057788	0.045036
1477	-0.227897	0.351945	-0.0816579	0.159066	-0.0253058	0.00117472	0.00182933	0.0223637	-0.179685	0.271388	-0.22974	-0.120103	0.290367		-0.151109	0.00418686	-0.0574552	0.045013
1478	-0.228194	0.352026	-0.0821319	0.158853	-0.0263461	0.000959562	0.00208163	0.0222419	-0.180037	0.270679	-0.228766	-0.120467	0.291345		-0.151543	0.00415095	-0.0571234	0.0449847
1479	-0.228489	0.3521	-0.0826047	0.158629	-0.0273843	0.000737091	0.00231779	0.0221236	-0.180381	0.269961	-0.227803	-0.120842	0.292353		-0.151971	0.00411188	-0.0567928	0.0449514
1480	-0.22878	0.352166	-0.0830765	0.158392	-0.0284201	0.000507463	0.00253773	0.022009	-0.180717	0.269234	-0.226852	-0.12123	0.293393		-0.152393	0.00406933	-0.0564633	0.0449136
1481	-0.229069	0.352224	-0.0835474	0.158143	-0.0294533	0.000270838	0.00274139	0.0218981	-0.181046	0.268497	-0.225913	-0.12163	0.294464		-0.15281	0.00402295	-0.0561351	0.0448715
1482	-0.229354	0.352274	-0.0840177	0.157882	-0.0304838	2.73871e-05	0.00292872	0.0217911	-0.181366	0.267751	-0.224986	-0.122043	0.295568		-0.153219	0.00397242	-0.0558083	0.0448255
1483	-0.229636	0.352316	-0.0844874	0.157609	-0.0315112	-0.000222709	0.00309971	0.0216882	-0.181677	0.266997	-0.224071	-0.122469	0.296705		-0.153622	0.0039174	-0.0554829	0.0447758
1484	-0.229914	0.35235	-0.0849568	0.157323	-0.0325355	-0.000479257	0.00325435	0.0215894	-0.181981	0.266233	-0.223169	-0.122907	0.297874		-0.154017	0.00385757	-0.055159	0.044723
1485	-0.230187	0.352377	-0.0854258	0.157024	-0.0335563	-0.000742057	0.00339267	0.0214949	-0.182275	0.265461	-0.222279	-0.123359	0.299078		-0.154406	0.0037926	-0.0548367	0.0446673
1486	-0.230457	0.352395	-0.0858948	0.156713	-0.0345735	-0.0010109	0.0035147	0.0214048	-0.182561	0.26468	-0.221401	-0.123824	0.300315		-0.154787	0.00372218	-0.0545161	0.0446089
1487	-0.230721	0.352406	-0.0863638	0.156389	-0.0355868	-0.00128557	0.0036205	0.0213192	-0.182839	0.26389	-0.220535	-0.124303	0.301587		-0.155161	0.00364599	-0.0541972	0.0445483
1488	-0.23098	0.352408	-0.0868331	0.156052	-0.036596	-0.00156586	0.00371015	0.0212382	-0.183108	0.263092	-0.219682	-0.124796	0.302893		-0.155526	0.00356373	-0.05388	0.0444858
1489	-0.231234	0.352403	-0.0873026	0.155702	-0.0376009	-0.00185153	0.00378375	0.0211618	-0.183368	0.262286	-0.218841	-0.125302	0.304233		-0.155884	0.00347511	-0.0535647	0.0444215
1490	-0.231483	0.35239	-0.0877727	0.15534	-0.0386012	-0.00214237	0.00384142	0.0210901	-0.183619	0.261471	-0.218013	-0.125823	0.305608		-0.156234	0.00337983	-0.0532513	0.0443558
1491	-0.231725	0.352369	-0.0882435	0.154964	-0.0395968	-0.00243814	0.00388331	0.0210233	-0.183862	0.260648	-0.217196	-0.126358	0.307018		-0.156575	0.00327763	-0.0529399	0.044289
1492	-0.231962	0.35234	-0.088715	0.154576	-0.0405874	-0.00273862	0.00390956	0.0209612	-0.184095	0.259817	-0.216391	-0.126907	0.308462		-0.156908	0.00316824	-0.0526305	0.0442213
1493	-0.232191	0.352304	-0.0891875	0.154176	-0.0415727	-0.00304356	0.00392037	0.0209039	-0.184321	0.258978	-0.215599	-0.12747	0.309941		-0.157232	0.00305141	-0.0523232	0.0441532
1494	-0.232415	0.35226	-0.0896611	0.153762	-0.0425526	-0.00335275	0.00391591	0.0208515	-0.184537	0.258131	-0.214818	-0.128048	0.311454		-0.157548	0.00292691	-0.0520181	0.0440849
1495	-0.232631	0.352208	-0.0901358	0.153336	-0.0435266	-0.00366592	0.00389642	0.0208039	-0.184745	0.257276	-0.214049	-0.128641	0.313002		-0.157856	0.00279451	-0.0517153	0.0440166
1496	-0.232839	0.352149	-0.0906118	0.152898	-0.0444947	-0.00398284	0.0038621	0.0207612	-0.184944	0.256413	-0.213292	-0.129248	0.314584		-0.158154	0.002654	-0.0514147	0.0439489
1497	-0.233041	0.352082	-0.0910893	0.152448	-0.0454565	-0.00430325	0.00381322	0.0207232	-0.185135	0.255543	-0.212546	-0.12987	0.3162		-0.158444	0.00250517	-0.0511165	0.0438819
1498	-0.233234	0.352007	-0.0915682	0.151985	-0.0464118	-0.00462692	0.00375002	0.02069	-0.185318	0.254666	-0.211811	-0.130507	0.317849		-0.158725	0.00234786	-0.0508206	0.0438161
1499	-0.233419	0.351925	-0.0920488	0.15151	-0.0473603	-0.00495358	0.00367279	0.0206615	-0.185492	0.253781	-0.211088	-0.131159	0.319532		-0.158998	0.00218188	-0.0505273	0.0437517
1500	-0.233596	0.351836	-0.092531	0.151024	-0.0483017	-0.00528298	0.00358183	0.0206376	-0.185658	0.252888	-0.210376	-0.131826	0.321248		-0.159261	0.00200708	-0.0502364	0.043689
1501	-0.233764	0.35174	-0.0930151	0.150525	-0.0492357	-0.00561487	0.00347743	0.0206182	-0.185817	0.251988	-0.209675	-0.132507	0.322996		-0.159516	0.00182332	-0.0499481	0.0436283
1502	-0.233923	0.351636	-0.093501	0.150016	-0.050162	-0.00594897	0.00335992	0.0206032	-0.185967	0.251082	-0.208985	-0.133204	0.324777		-0.159762	0.00163047	-0.0496625	0.0435698
1503	-0.234073	0.351525	-0.0939888	0.149495	-0.0510803	-0.00628502	0.00322964	0.0205925	-0.186109	0.250168	-0.208306	-0.133915	0.32659		-0.159999	0.00142842	-0.0493794	0.0435138
1504	-0.234214	0.351407	-0.0944787	0.148963	-0.0519903	-0.00662275	0.00308695	0.020586	-0.186244	0.249247	-0.207637	-0.134641	0.328433		-0.160227	0.00121706	-0.0490991	0.0434605
1505	-0.234345	0.351282	-0.0949705	0.14842	-0.0528918	-0.00696189	0.00293221	0.0205834	-0.186372	0.24832	-0.206979	-0.135382	0.330308		-0.160447	0.0009963	-0.0488216	0.0434101
1506	-0.234466	0.351151	-0.0954645	0.147867	-0.0537843	-0.00730216	0.0027658	0.0205845	-0.186492	0.247385	-0.206332	-0.136137	0.332212		-0.160658	0.000766058	-0.0485469	0.0433628
1507	-0.234578	0.351012	-0.0959605	0.147304	-0.0546676	-0.00764329	0.00258812	0.0205894	-0.186605	0.246444	-0.205695	-0.136907	0.334146		-0.160861	0.000526267	-0.048275	0.0433188
1508	-0.234679	0.350867	-0.0964587	0.146731	-0.0555414	-0.00798501	0.00239957	0.0205976	-0.186711	0.245497	-0.205068	-0.137691	0.336108		-0.161055	0.000276872	-0.048006	0.0432783
1509	-0.23477	0.350715	-0.096959	0.146148	-0.0564053	-0.00832703	0.00220058	0.0206089	-0.186811	0.244543	-0.204451	-0.13849	0.338098		-0.161241	1.78303e-05	-0.0477399	0.0432416
1510	-0.234851	0.350556	-0.0974615	0.145556	-0.057259	-0.00866909	0.00199157	0.0206232	-0.186904	0.243583	-0.203844	-0.139302	0.340114		-0.161419	-0.00025089	-0.0474768	0.0432089
1511	-0.234921	0.350391	-0.0979661	0.144955	-0.0581021	-0.00901091	0.001773	0.0206403	-0.186991	0.242617	-0.203246	-0.140129	0.342157		-0.161588	-0.000529309	-0.0472167	0.0431806
1512	-0.234981	0.35022	-0.0984729	0.144345	-0.0589345	-0.0093522	0.00154531	0.0206597	-0.187072	0.241645	-0.202658	-0.140969	0.344225		-0.16175	-0.000817431	-0.0469597	0.0431568
1513	-0.23503	0.350042	-0.098982	0.143727	-0.0597556	-0.0096927	0.00130896	0.0206813	-0.187148	0.240667	-0.202078	-0.141822	0.346317		-0.161904	-0.00111525	-0.0467058	0.043138
1514	-0.235068	0.349858	-0.0994931	0.143101	-0.0605653	-0.0100321	0.00106444	0.0207048	-0.187218	0.239683	-0.201508	-0.142689	0.348433		-0.16205	-0.00142274	-0.046455	0.0431245
1515	-0.235095	0.349668	-0.100006	0.142468	-0.0613633	-0.0103702	0.000812211	0.02073	-0.187283	0.238693	-0.200946	-0.143569	0.350571		-0.162188	-0.00173987	-0.0462074	0.0431168
1516	-0.235112	0.349473	-0.100522	0.141827	-0.0621491	-0.0107067	0.000552775	0.0207564	-0.187344	0.237697	-0.200392	-0.144461	0.35273		-0.162319	-0.00206659	-0.0459631	0.0431154
1517	-0.235118	0.349271	-0.10104	0.14118	-0.0629224	-0.0110413	0.000286623	0.0207838	-0.1874	0.236696	-0.199847	-0.145365	0.35491		-0.162443	-0.00240284	-0.0457219	0.0431207
1518	-0.235113	0.349064	-0.101559	0.140527	-0.0636831	-0.0113738	1.42523e-05	0.0208119	-0.187452	0.235689	-0.199309	-0.146282	0.357109		-0.162559	-0.00274853	-0.0454841	0.0431332
1519	-0.235098	0.348851	-0.102081	0.139867	-0.0644307	-0.0117039	-0.000263834	0.0208404	-0.1875	0.234678	-0.198778	-0.147211	0.359327		-0.162668	-0.00310359	-0.0452496	0.0431536
1520	-0.235072	0.348632	-0.102605	0.139202	-0.0651649	-0.0120313	-0.00054713	0.0208689	-0.187545	0.233661	-0.198254	-0.14815	0.361561		-0.162771	-0.00346792	-0.0450185	0.0431821
1521	-0.235035	0.348409	-0.103131	0.138533	-0.0658855	-0.0123558	-0.000835131	0.0208971	-0.187586	0.232638	-0.197737	-0.149101	0.363812		-0.162867	-0.0038414	-0.0447908	0.0432195
1522	-0.234988	0.34818	-0.103659	0.137858	-0.0665921	-0.0126772	-0.00112733	0.0209246	-0.187625	0.231611	-0.197226	-0.150063	0.366077		-0.162955	-0.0042239	-0.0445665	0.043266
1523	-0.234931	0.347946	-0.104189	0.13718	-0.0672844	-0.0129951	-0.00142321	0.0209511	-0.187662	0.230579	-0.19672	-0.151035	0.368356		-0.163038	-0.00461531	-0.0443457	0.043322
1524	-0.234863	0.347708	-0.104721	0.136498	-0.0679622	-0.0133094	-0.00172227	0.0209763	-0.187696	0.229542	-0.19622	-0.152016	0.370647		-0.163114	-0.00501547	-0.0441285	0.043388
1525	-0.234786	0.347464	-0.105255	0.135812	-0.0686251	-0.0136198	-0.00202399	0.0209997	-0.187729	0.228501	-0.195725	-0.153008	0.372949		-0.163184	-0.00542423	-0.0439147	0.0434643
1526	-0.234699	0.347217	-0.105791	0.135124	-0.0692729	-0.0139262	-0.00232786	0.021021	-0.187761	0.227455	-0.195234	-0.154008	0.375261		-0.163247	-0.00584144	-0.0437046	0.0435512
1527	-0.234603	0.346965	-0.106328	0.134434	-0.0699053	-0.0142282	-0.00263335	0.0210398	-0.187792	0.226405	-0.194748	-0.155017	0.377581		-0.163305	-0.00626692	-0.043498	0.043649
1528	-0.234497	0.346709	-0.106868	0.133742	-0.0705219	-0.0145258	-0.00293996	0.0210558	-0.187822	0.22535	-0.194265	-0.156035	0.379907		-0.163357	-0.00670048	-0.0432951	0.0437581
1529	-0.234383	0.34645	-0.10741	0.133048	-0.0711227	-0.0148186	-0.00324719	0.0210685	-0.187852	0.224291	-0.193786	-0.15706	0.38224		-0.163403	-0.00714194	-0.0430958	0.0438786
1530	-0.234259	0.346186	-0.107953	0.132354	-0.0717072	-0.0151065	-0.00355451	0.0210777	-0.187882	0.223229	-0.193309	-0.158092	0.384576		-0.163443	-0.00759107	-0.0429002	0.0440109
1531	-0.234128	0.34592	-0.108498	0.131659	-0.0722753	-0.0153893	-0.00386145	0.0210828	-0.187913	0.222162	-0.192835	-0.159131	0.386915		-0.163478	-0.00804766	-0.0427083	0.0441555
1532	-0.233988	0.34565	-0.109045	0.130964	-0.0728267	-0.0156669	-0.0041675	0.0210836	-0.187945	0.221092	-0.192363	-0.160177	0.389255		-0.163507	-0.00851148	-0.0425202	0.0443125
1533	-0.23384	0.345377	-0.109594	0.13027	-0.0733612	-0.0159391	-0.00447219	0.0210797	-0.187979	0.220018	-0.191892	-0.161228	0.391595		-0.163532	-0.00898228	-0.0423357	0.0444824
1534	-0.233685	0.345102	-0.110145	0.129576	-0.0738786	-0.0162056	-0.00477503	0.0210707	-0.188014	0.218941	-0.191423	-0.162285	0.393933		-0.163551	-0.0094598	-0.042155	0.0446655
1535	-0.233524	0.344824	-0.110697	0.128884	-0.0743787	-0.0164665	-0.00507556	0.0210563	-0.188052	0.217861	-0.190955	-0.163346	0.396268		-0.163565	-0.00994379	-0.0419781	0.0448623
1536	-0.233355	0.344543	-0.11125	0.128193	-0.0748614	-0.0167214	-0.00537331	0.0210361	-0.188093	0.216778	-0.190488	-0.164412	0.398599		-0.163574	-0.010434	-0.0418049	0.0450732
1537	-0.233181	0.344261	-0.111805	0.127505	-0.0753265	-0.0169704	-0.00566782	0.0210097	-0.188136	0.215692	-0.190021	-0.165482	0.400923		-0.163578	-0.0109301	-0.0416354	0.0452986
1538	-0.233001	0.343977	-0.112362	0.12682	-0.0757738	-0.0172133	-0.00595866	0.0209769	-0.188183	0.214602	-0.189554	-0.166555	0.403241		-0.163577	-0.0114318	-0.0414697	0.0455389
1539	-0.232815	0.343691	-0.11292	0.126137	-0.0762032	-0.0174499	-0.00624538	0.0209372	-0.188234	0.213511	-0.189087	-0.16763	0.405549		-0.163572	-0.0119388	-0.0413078	0.0457946
1540	-0.232625	0.343405	-0.11348	0.125458	-0.0766147	-0.0176803	-0.00652757	0.0208905	-0.18829	0.212417	-0.188619	-0.168708	0.407847		-0.163562	-0.0124508	-0.0411495	0.0460663
1541	-0.232431	0.343117	-0.11404	0.124783	-0.0770081	-0.0179042	-0.00680482	0.0208363	-0.18835	0.21132	-0.18815	-0.169787	0.410132		-0.163549	-0.0129676	-0.040995	0.0463545
1542	-0.232233	0.342828	-0.114602	0.124113	-0.0773834	-0.0181217	-0.00707673	0.0207745	-0.188416	0.210222	-0.18768	-0.170867	0.412405		-0.16353	-0.0134887	-0.0408441	0.0466597
1543	-0.232031	0.342539	-0.115166	0.123447	-0.0777405	-0.0183327	-0.00734292	0.0207046	-0.188488	0.209121	-0.187209	-0.171948	0.414662		-0.163508	-0.0140139	-0.040697	0.0469825
1544	-0.231827	0.34225	-0.11573	0.122786	-0.0780794	-0.0185371	-0.007603	0.0206265	-0.188565	0.208019	-0.186736	-0.173029	0.416902		-0.163482	-0.0145429	-0.0405534	0.0473235
1545	-0.231621	0.341961	-0.116295	0.122131	-0.0784001	-0.0187349	-0.00785663	0.0205399	-0.188649	0.206915	-0.186261	-0.174109	0.419123		-0.163451	-0.0150753	-0.0404135	0.0476832
1546	-0.231413	0.341672	-0.116861	0.121482	-0.0787026	-0.0189261	-0.00810344	0.0204446	-0.18874	0.20581	-0.185785	-0.175187	0.421325		-0.163417	-0.0156107	-0.0402772	0.0480623
1547	-0.231204	0.341383	-0.117428	0.120839	-0.0789869	-0.0191106	-0.00834311	0.0203403	-0.188838	0.204703	-0.185306	-0.176264	0.423504		-0.16338	-0.0161488	-0.0401444	0.0484614
1548	-0.230994	0.341096	-0.117995	0.120203	-0.0792531	-0.0192884	-0.00857532	0.0202268	-0.188944	0.203595	-0.184825	-0.177339	0.42566		-0.163339	-0.0166893	-0.0400152	0.048881
1549	-0.230785	0.34081	-0.118563	0.119574	-0.0795014	-0.0194596	-0.00879974	0.020104	-0.189058	0.202486	-0.184342	-0.17841	0.427791		-0.163294	-0.0172317	-0.0398894	0.0493219
1550	-0.230576	0.340524	-0.119132	0.118953	-0.0797317	-0.0196242	-0.00901608	0.0199716	-0.189181	0.201377	-0.183857	-0.179478	0.429895		-0.163247	-0.0177758	-0.0397671	0.0497845
1551	-0.230368	0.340241	-0.119701	0.118339	-0.0799442	-0.0197823	-0.00922405	0.0198295	-0.189312	0.200267	-0.183369	-0.180541	0.43197		-0.163196	-0.018321	-0.0396482	0.0502696
1552	-0.230162	0.339959	-0.12027	0.117733	-0.080139	-0.0199338	-0.00942336	0.0196775	-0.189453	0.199157	-0.182878	-0.1816	0.434014		-0.163143	-0.018867	-0.0395326	0.0507776
1553	-0.229958	0.339679	-0.120839	0.117136	-0.0803164	-0.0200788	-0.00961375	0.0195155	-0.189602	0.198047	-0.182385	-0.182653	0.436025		-0.163087	-0.0194135	-0.0394204	0.0513089
1554	-0.229757	0.339402	-0.121408	0.116547	-0.0804766	-0.0202175	-0.00979497	0.0193435	-0.189762	0.196937	-0.18189	-0.1837	0.438002		-0.163029	-0.0199599	-0.0393114	0.0518642
1555	-0.22956	0.339127	-0.121977	0.115968	-0.0806197	-0.02035	-0.00996677	0.0191613	-0.189932	0.195827	-0.181393	-0.18474	0.439943		-0.162968	-0.020506	-0.0392056	0.0524437
1556	-0.229367	0.338855	-0.122545	0.115398	-0.0807459	-0.0204763	-0.0101289	0.0189688	-0.190112	0.194717	-0.180894	-0.185773	0.441845		-0.162905	-0.0210514	-0.039103	0.0530478
1557	-0.229178	0.338585	-0.123113	0.114838	-0.0808557	-0.0205965	-0.0102813	0.018766	-0.190302	0.193609	-0.180392	-0.186799	0.443707		-0.162841	-0.0215955	-0.0390036	0.0536768
1558	-0.228994	0.338319	-0.123681	0.114287	-0.0809492	-0.0207109	-0.0104235	0.0185529	-0.190504	0.192501	-0.179889	-0.187816	0.445527		-0.162774	-0.0221382	-0.0389072	0.054331
1559	-0.228816	0.338056	-0.124247	0.113747	-0.0810268	-0.0208195	-0.0105556	0.0183294	-0.190716	0.191394	-0.179384	-0.188824	0.447303		-0.162707	-0.0226789	-0.038814	0.0550104
1560	-0.228644	0.337797	-0.124813	0.113218	-0.0810888	-0.0209226	-0.0106772	0.0180955	-0.19094	0.190289	-0.178878	-0.189822	0.449033		-0.162637	-0.0232174	-0.0387237	0.0557152
1561	-0.22848	0.337542	-0.125377	0.112699	-0.0811356	-0.0210202	-0.0107883	0.0178511	-0.191176	0.189186	-0.17837	-0.19081	0.450715		-0.162567	-0.0237531	-0.0386364	0.0564454
1562	-0.228322	0.33729	-0.125939	0.112192	-0.0811676	-0.0211126	-0.0108888	0.0175965	-0.191423	0.188084	-0.177861	-0.191788	0.452347		-0.162497	-0.0242858	-0.038552	0.0572011
1563	-0.228173	0.337043	-0.126501	0.111696	-0.0811851	-0.0211999	-0.0109784	0.0173315	-0.191682	0.186984	-0.177352	-0.192755	0.453928		-0.162425	-0.0248152	-0.0384705	0.0579821
1564	-0.228032	0.3368	-0.12706	0.111211	-0.0811887	-0.0212824	-0.0110572	0.0170562	-0.191953	0.185887	-0.176843	-0.193709	0.455456		-0.162353	-0.0253408	-0.0383918	0.0587885
1565	-0.227901	0.336562	-0.127617	0.110738	-0.0811786	-0.0213603	-0.0111249	0.0167707	-0.192237	0.184792	-0.176333	-0.194652	0.456928		-0.162282	-0.0258622	-0.038316	0.0596199
1566	-0.227779	0.336328	-0.128173	0.110277	-0.0811554	-0.0214338	-0.0111816	0.016475	-0.192532	0.1837	-0.175823	-0.195581	0.458344		-0.16221	-0.0263793	-0.0382429	0.0604762
1567	-0.227667	0.3361	-0.128725	0.109828	-0.0811195	-0.0215031	-0.0112272	0.0161694	-0.192841	0.182611	-0.175314	-0.196498	0.459702		-0.162139	-0.0268916	-0.0381724	0.061357
1568	-0.227566	0.335876	-0.129275	0.109392	-0.0810715	-0.0215685	-0.0112616	0.0158538	-0.193162	0.181525	-0.174806	-0.1974	0.461		-0.162068	-0.0273989	-0.0381047	0.0622618
1569	-0.227476	0.335658	-0.129822	0.108968	-0.0810118	-0.0216302	-0.0112848	0.0155285	-0.193495	0.180443	-0.174299	-0.198289	0.462236		-0.161999	-0.0279008	-0.0380396	0.0631903
1570	-0.227398	0.335445	-0.130366	0.108557	-0.0809409	-0.0216885	-0.0112969	0.0151935	-0.193841	0.179364	-0.173793	-0.199162	0.46341		-0.16193	-0.028397	-0.0379771	0.0641417
1571	-0.227332	0.335238	-0.130907	0.108159	-0.0808594	-0.0217437	-0.0112978	0.014849	-0.194201	0.17829	-0.17329	-0.200021	0.46452		-0.161863	-0.0288873	-0.0379171	0.0651155
1572	-0.227279	0.335037	-0.131444	0.107774	-0.0807677	-0.0217961	-0.0112875	0.0144953	-0.194572	0.17722	-0.172789	-0.200864	0.465564		-0.161797	-0.0293713	-0.0378597	0.0661109
1573	-0.22724	0.334841	-0.131977	0.107402	-0.0806665	-0.0218459	-0.0112661	0.0141324	-0.194957	0.176154	-0.172291	-0.201692	0.466541		-0.161733	-0.0298488	-0.0378049	0.0671272
1574	-0.227214	0.334651	-0.132505	0.107043	-0.0805562	-0.0218935	-0.0112337	0.0137606	-0.195355	0.175094	-0.171796	-0.202503	0.467451		-0.161672	-0.0303195	-0.0377525	0.0681635
1575	-0.227202	0.334468	-0.133029	0.106698	-0.0804375	-0.0219391	-0.0111902	0.0133802	-0.195765	0.174039	-0.171305	-0.203297	0.468292		-0.161613	-0.0307832	-0.0377027	0.0692188
1576	-0.227205	0.334291	-0.133549	0.106366	-0.0803108	-0.0219832	-0.0111359	0.0129912	-0.196188	0.172989	-0.170818	-0.204075	0.469062		-0.161556	-0.0312395	-0.0376553	0.0702922
1577	-0.227223	0.33412	-0.134063	0.106048	-0.0801767	-0.022026	-0.0110708	0.012594	-0.196624	0.171944	-0.170335	-0.204835	0.469761		-0.161502	-0.0316883	-0.0376105	0.0713825
1578	-0.227257	0.333955	-0.134572	0.105743	-0.0800358	-0.0220678	-0.010995	0.0121889	-0.197073	0.170906	-0.169858	-0.205577	0.470388		-0.161451	-0.0321294	-0.037568	0.0724886
1579	-0.227307	0.333797	-0.135075	0.105452	-0.0798886	-0.022109	-0.0109086	0.011776	-0.197534	0.169874	-0.169386	-0.206302	0.470942		-0.161403	-0.0325624	-0.0375281	0.0736091
1580	-0.227373	0.333646	-0.135572	0.105175	-0.0797356	-0.02215	-0.0108118	0.0113556	-0.198007	0.168848	-0.168921	-0.207008	0.471422		-0.161359	-0.0329871	-0.0374906	0.0747429
1581	-0.227456	0.333501	-0.136063	0.104911	-0.0795773	-0.022191	-0.0107048	0.0109281	-0.198492	0.167829	-0.168462	-0.207695	0.471827		-0.161318	-0.0334034	-0.0374555	0.0758886
1582	-0.227556	0.333364	-0.136547	0.10466	-0.0794142	-0.0222325	-0.0105877	0.0104937	-0.198989	0.166817	-0.16801	-0.208364	0.472156		-0.161282	-0.0338109	-0.0374229	0.0770449
1583	-0.227674	0.333233	-0.137025	0.104424	-0.0792469	-0.0222747	-0.0104608	0.0100526	-0.199498	0.165812	-0.167565	-0.209013	0.472408		-0.161249	-0.0342095	-0.0373927	0.0782101
1584	-0.22781	0.333109	-0.137496	0.1042	-0.0790758	-0.0223181	-0.0103241	0.00960526	-0.200019	0.164815	-0.167129	-0.209643	0.472584		-0.16122	-0.034599	-0.0373649	0.0793829
1585	-0.227964	0.332992	-0.137959	0.10399	-0.0789013	-0.0223628	-0.010178	0.00915189	-0.200551	0.163825	-0.166701	-0.210254	0.472682		-0.161196	-0.0349791	-0.0373396	0.0805616
1586	-0.228136	0.332882	-0.138414	0.103793	-0.078724	-0.0224094	-0.0100226	0.00869283	-0.201094	0.162843	-0.166282	-0.210844	0.472702		-0.161176	-0.0353497	-0.0373167	0.0817446
1587	-0.228328	0.332779	-0.138861	0.103609	-0.0785443	-0.0224581	-0.00985827	0.00822838	-0.201647	0.161869	-0.165873	-0.211414	0.472643		-0.161161	-0.0357106	-0.0372961	0.0829304
1588	-0.228538	0.332683	-0.1393	0.103438	-0.0783625	-0.0225093	-0.00968514	0.00775888	-0.202212	0.160904	-0.165474	-0.211964	0.472505		-0.16115	-0.0360617	-0.037278	0.0841172
1589	-0.228769	0.332595	-0.139731	0.10328	-0.0781791	-0.0225633	-0.00950351	0.00728465	-0.202786	0.159948	-0.165084	-0.212494	0.472288		-0.161145	-0.0364026	-0.0372623	0.0853033
1590	-0.229018	0.332514	-0.140152	0.103134	-0.0779945	-0.0226203	-0.00931366	0.00680603	-0.20337	0.159	-0.164706	-0.213002	0.471991		-0.161144	-0.0367334	-0.037249	0.0864872
1591	-0.229288	0.332439	-0.140565	0.103	-0.077809	-0.0226808	-0.00911584	0.00632335	-0.203964	0.158061	-0.164338	-0.21349	0.471615		-0.161148	-0.0370538	-0.0372381	0.0876669
1592	-0.229577	0.332372	-0.140968	0.102879	-0.077623	-0.0227451	-0.00891036	0.00583695	-0.204567	0.157132	-0.163982	-0.213957	0.471159		-0.161158	-0.0373638	-0.0372296	0.088841
1593	-0.229887	0.332313	-0.141361	0.102769	-0.0774369	-0.0228134	-0.00869751	0.00534717	-0.205179	0.156213	-0.163637	-0.214404	0.470624		-0.161172	-0.0376632	-0.0372235	0.0900078
1594	-0.230217	0.33226	-0.141744	0.102671	-0.0772508	-0.022886	-0.00847758	0.00485436	-0.205799	0.155303	-0.163303	-0.214829	0.470009		-0.161192	-0.0379519	-0.0372199	0.0911655
1595	-0.230568	0.332215	-0.142117	0.102584	-0.0770652	-0.0229632	-0.00825088	0.00435887	-0.206427	0.154403	-0.162982	-0.215232	0.469316		-0.161218	-0.0382299	-0.0372188	0.0923126
1596	-0.230939	0.332176	-0.14248	0.102508	-0.0768802	-0.0230454	-0.00801773	0.00386103	-0.207063	0.153513	-0.162672	-0.215615	0.468544		-0.161248	-0.0384971	-0.0372201	0.0934474
1597	-0.23133	0.332145	-0.142832	0.102443	-0.0766962	-0.0231327	-0.00777845	0.00336121	-0.207707	0.152634	-0.162375	-0.215977	0.467695		-0.161284	-0.0387534	-0.0372239	0.0945684
1598	-0.231742	0.332121	-0.143173	0.102388	-0.0765134	-0.0232254	-0.00753337	0.00285974	-0.208357	0.151766	-0.162089	-0.216317	0.466768		-0.161325	-0.0389988	-0.0372303	0.0956739
1599	-0.232175	0.332104	-0.143503	0.102343	-0.0763319	-0.0233239	-0.00728284	0.00235698	-0.209014	0.150908	-0.161815	-0.216636	0.465766		-0.161372	-0.0392333	-0.0372393	0.0967625
1600	-0.232628	0.332094	-0.143822	0.102308	-0.076152	-0.0234283	-0.00702719	0.00185328	-0.209677	0.150061	-0.161553	-0.216934	0.464689		-0.161424	-0.0394569	-0.037251	0.0978324
1601	-0.233102	0.332091	-0.144129	0.102282	-0.0759738	-0.0235389	-0.00676678	0.00134898	-0.210345	0.149226	-0.161303	-0.217211	0.463538		-0.161482	-0.0396696	-0.0372654	0.0988823
1602	-0.233596	0.332095	-0.144425	0.102266	-0.0757975	-0.0236559	-0.00650195	0.000844437	-0.211019	0.148403	-0.161065	-0.217467	0.462315		-0.161545	-0.0398714	-0.0372825	0.0999108
1603	-0.234111	0.332106	-0.144709	0.102257	-0.0756232	-0.0237796	-0.00623308	0.000339992	-0.211697	0.147591	-0.160838	-0.217702	0.46102		-0.161613	-0.0400623	-0.0373025	0.100916
1604	-0.234646	0.332123	-0.14498	0.102257	-0.0754509	-0.0239101	-0.00596052	-0.000164001	-0.21238	0.146791	-0.160622	-0.217916	0.459655		-0.161686	-0.0402424	-0.0373254	0.101898
1605	-0.235201	0.332147	-0.14524	0.102265	-0.0752807	-0.0240476	-0.00568464	-0.000667194	-0.213067	0.146003	-0.160417	-0.21811	0.458223		-0.161764	-0.0404118	-0.0373512	0.102853
1606	-0.235776	0.332178	-0.145487	0.102281	-0.0751128	-0.0241923	-0.00540581	-0.00116924	-0.213757	0.145227	-0.160223	-0.218283	0.456723		-0.161847	-0.0405704	-0.0373802	0.103782
1607	-0.236371	0.332215	-0.145721	0.102303	-0.074947	-0.0243444	-0.0051244	-0.00166978	-0.214451	0.144465	-0.160039	-0.218435	0.455158		-0.161935	-0.0407184	-0.0374122	0.104682
1608	-0.236986	0.332258	-0.145943	0.102332	-0.0747835	-0.0245041	-0.0048408	-0.00216847	-0.215147	0.143714	-0.159864	-0.218568	0.45353		-0.162028	-0.0408557	-0.0374475	0.105553
1609	-0.23762	0.332308	-0.146152	0.102368	-0.0746221	-0.0246714	-0.00455538	-0.00266497	-0.215845	0.142977	-0.159699	-0.21868	0.45184		-0.162125	-0.0409825	-0.037486	0.106394
1610	-0.238272	0.332364	-0.146349	0.102409	-0.0744629	-0.0248466	-0.00426853	-0.00315893	-0.216545	0.142253	-0.159542	-0.218773	0.45009		-0.162227	-0.0410989	-0.037528	0.107203
1611	-0.238944	0.332425	-0.146532	0.102455	-0.0743058	-0.0250297	-0.00398065	-0.00365002	-0.217246	0.141542	-0.159394	-0.218846	0.448282		-0.162333	-0.0412048	-0.0375734	0.107979
1612	-0.239634	0.332493	-0.146703	0.102507	-0.0741507	-0.0252209	-0.00369212	-0.0041379	-0.217948	0.140845	-0.159253	-0.2189	0.446417		-0.162443	-0.0413005	-0.0376223	0.108722
1613	-0.240343	0.332567	-0.146861	0.102563	-0.0739975	-0.0254202	-0.00340334	-0.00462222	-0.218651	0.140161	-0.15912	-0.218934	0.444498		-0.162557	-0.0413861	-0.0376748	0.10943
1614	-0.241069	0.332646	-0.147005	0.102623	-0.0738461	-0.0256277	-0.0031147	-0.00510265	-0.219353	0.139491	-0.158993	-0.21895	0.442526		-0.162674	-0.0414615	-0.0377311	0.110103
1615	-0.241812	0.332731	-0.147137	0.102687	-0.0736963	-0.0258435	-0.0028266	-0.00557886	-0.220056	0.138835	-0.158872	-0.218948	0.440503		-0.162795	-0.041527	-0.037791	0.110741
1616	-0.242573	0.332821	-0.147256	0.102755	-0.073548	-0.0260676	-0.00253944	-0.00605053	-0.220757	0.138193	-0.158756	-0.218927	0.438431		-0.162919	-0.0415826	-0.0378548	0.111342
1617	-0.24335	0.332916	-0.147361	0.102825	-0.073401	-0.0263002	-0.0022536	-0.00651731	-0.221458	0.137565	-0.158645	-0.218888	0.436312		-0.163046	-0.0416285	-0.0379225	0.111907
1618	-0.244144	0.333017	-0.147454	0.102897	-0.0732551	-0.0265412	-0.00196948	-0.0069789	-0.222157	0.136951	-0.158538	-0.218832	0.434148		-0.163175	-0.0416647	-0.0379942	0.112434
1619	-0.244953	0.333122	-0.147534	0.102972	-0.0731101	-0.0267907	-0.00168747	-0.00743498	-0.222854	0.136352	-0.158434	-0.218758	0.43194		-0.163307	-0.0416914	-0.0380698	0.112923
1620	-0.245778	0.333232	-0.147601	0.103048	-0.0729658	-0.0270486	-0.00140794	-0.00788522	-0.223549	0.135768	-0.158334	-0.218667	0.429691		-0.16344	-0.0417086	-0.0381495	0.113374
1621	-0.246617	0.333347	-0.147655	0.103125	-0.072822	-0.0273151	-0.00113129	-0.00832933	-0.224241	0.135198	-0.158235	-0.21856	0.427402		-0.163576	-0.0417166	-0.0382333	0.113787
1622	-0.247471	0.333467	-0.147697	0.103203	-0.0726784	-0.0275901	-0.00085787	-0.00876699	-0.22493	0.134643	-0.158138	-0.218436	0.425075		-0.163713	-0.0417154	-0.0383213	0.114162
1623	-0.248339	0.33359	-0.147727	0.103281	-0.0725349	-0.0278735	-0.000588057	-0.00919792	-0.225616	0.134103	-0.158041	-0.218297	0.422712		-0.163851	-0.0417052	-0.0384135	0.114498
1624	-0.249221	0.333718	-0.147744	0.103358	-0.0723912	-0.0281654	-0.0003222	-0.00962181	-0.226299	0.133578	-0.157945	-0.218142	0.420315		-0.16399	-0.0416862	-0.0385101	0.114795
1625	-0.250115	0.33385	-0.147749	0.103435	-0.072247	-0.0284657	-6.06454e-05	-0.0100384	-0.226978	0.133068	-0.157849	-0.217971	0.417885		-0.164129	-0.0416584	-0.0386109	0.115054
1626	-0.251022	0.333986	-0.147741	0.103511	-0.0721021	-0.0287744	0.000196274	-0.0104474	-0.227652	0.132572	-0.157752	-0.217786	0.415426		-0.164269	-0.0416221	-0.0387162	0.115275
1627	-0.25194	0.334125	-0.147722	0.103586	-0.0719563	-0.0290914	0.000448235	-0.0108485	-0.228323	0.132092	-0.157653	-0.217586	0.412937		-0.164409	-0.0415773	-0.0388259	0.115456
1628	-0.25287	0.334268	-0.147692	0.103658	-0.0718093	-0.0294166	0.000694923	-0.0112415	-0.228988	0.131627	-0.157552	-0.217373	0.410422		-0.164548	-0.0415244	-0.03894	0.1156
1629	-0.253811	0.334414	-0.147649	0.103728	-0.0716609	-0.02975	0.000936037	-0.0116262	-0.229649	0.131177	-0.157448	-0.217145	0.407881		-0.164686	-0.0414634	-0.0390587	0.115706
1630	-0.254761	0.334563	-0.147596	0.103795	-0.0715107	-0.0300915	0.00117129	-0.0120021	-0.230305	0.130743	-0.157341	-0.216905	0.405317		-0.164823	-0.0413946	-0.039182	0.115774
1631	-0.255721	0.334715	-0.147531	0.103859	-0.0713585	-0.030441	0.0014004	-0.0123692	-0.230955	0.130323	-0.15723	-0.216652	0.402731		-0.164959	-0.0413181	-0.0393098	0.115805
1632	-0.25669	0.33487	-0.147456	0.103919	-0.0712041	-0.0307983	0.0016231	-0.0127271	-0.2316	0.129918	-0.157115	-0.216386	0.400125		-0.165094	-0.0412342	-0.0394422	0.115798
1633	-0.257668	0.335028	-0.147369	0.103976	-0.0710471	-0.0311635	0.00183915	-0.0130757	-0.232239	0.129528	-0.156996	-0.216108	0.3975		-0.165226	-0.0411429	-0.0395793	0.115756
1634	-0.258653	0.335188	-0.147273	0.104027	-0.0708873	-0.0315362	0.0020483	-0.0134146	-0.232873	0.129153	-0.156871	-0.215819	0.394858		-0.165355	-0.0410446	-0.039721	0.115677
1635	-0.259645	0.33535	-0.147166	0.104074	-0.0707244	-0.0319164	0.00225033	-0.0137438	-0.2335	0.128792	-0.156741	-0.215519	0.3922		-0.165482	-0.0409395	-0.0398674	0.115563
1636	-0.260644	0.335515	-0.147049	0.104116	-0.0705582	-0.032304	0.00244502	-0.0140628	-0.234121	0.128447	-0.156605	-0.215208	0.389529		-0.165606	-0.0408278	-0.0400185	0.115415
1637	-0.261648	0.335681	-0.146922	0.104152	-0.0703883	-0.0326988	0.00263219	-0.0143717	-0.234735	0.128116	-0.156463	-0.214887	0.386844		-0.165727	-0.0407097	-0.0401744	0.115232
1638	-0.262658	0.335849	-0.146785	0.104182	-0.0702145	-0.0331007	0.00281165	-0.0146701	-0.235343	0.127799	-0.156314	-0.214556	0.384148		-0.165843	-0.0405855	-0.040335	0.115017
1639	-0.263671	0.336018	-0.14664	0.104206	-0.0700365	-0.0335094	0.00298324	-0.0149579	-0.235944	0.127496	-0.156158	-0.214216	0.381441		-0.165956	-0.0404554	-0.0405003	0.114769
1640	-0.264689	0.336189	-0.146485	0.104223	-0.0698541	-0.0339248	0.0031468	-0.0152348	-0.236539	0.127208	-0.155996	-0.213867	0.378726		-0.166064	-0.0403197	-0.0406704	0.11449
1641	-0.26571	0.336362	-0.146322	0.104233	-0.0696669	-0.0343467	0.0033022	-0.0155008	-0.237126	0.126933	-0.155825	-0.21351	0.376004		-0.166167	-0.0401786	-0.0408454	0.114181
1642	-0.266734	0.336535	-0.14615	0.104236	-0.0694748	-0.0347749	0.00344931	-0.0157557	-0.237707	0.126672	-0.155648	-0.213144	0.373275		-0.166266	-0.0400325	-0.0410251	0.113842
1643	-0.267759	0.336709	-0.14597	0.104231	-0.0692774	-0.0352093	0.00358803	-0.0159992	-0.238281	0.126425	-0.155462	-0.212771	0.370541		-0.166358	-0.0398816	-0.0412097	0.113475
1644	-0.268786	0.336884	-0.145782	0.104218	-0.0690744	-0.0356495	0.00371826	-0.0162313	-0.238847	0.126191	-0.155268	-0.212391	0.367804		-0.166445	-0.0397263	-0.0413991	0.113081
1645	-0.269813	0.337059	-0.145587	0.104197	-0.0688657	-0.0360956	0.00383993	-0.0164518	-0.239407	0.12597	-0.155067	-0.212004	0.365063		-0.166526	-0.0395668	-0.0415934	0.11266
1646	-0.27084	0.337235	-0.145384	0.104168	-0.068651	-0.0365471	0.00395297	-0.0166606	-0.239959	0.125761	-0.154857	-0.211611	0.362321		-0.166601	-0.0394036	-0.0417925	0.112215
1647	-0.271866	0.337411	-0.145175	0.10413	-0.06843	-0.037004	0.00405733	-0.0168575	-0.240505	0.125566	-0.154638	-0.211212	0.359579		-0.166669	-0.0392368	-0.0419964	0.111746
1648	-0.272891	0.337588	-0.144959	0.104082	-0.0682025	-0.037466	0.00415296	-0.0170426	-0.241043	0.125382	-0.154411	-0.210807	0.356837		-0.16673	-0.0390669	-0.0422052	0.111254
1649	-0.273914	0.337764	-0.144737	0.104026	-0.0679683	-0.037933	0.00423986	-0.0172156	-0.241574	0.125211	-0.154175	-0.210398	0.354098		-0.166784	-0.0388941	-0.0424189	0.110741
1650	-0.274935	0.33794	-0.144509	0.10396	-0.067727	-0.0384047	0.004318	-0.0173765	-0.242097	0.125051	-0.153931	-0.209984	0.35136		-0.16683	-0.0387189	-0.0426374	0.110208
1651	-0.275952	0.338117	-0.144275	0.103885	-0.0674785	-0.0388809	0.00438738	-0.0175253	-0.242614	0.124903	-0.153678	-0.209566	0.348627		-0.166869	-0.0385415	-0.0428607	0.109655
1652	-0.276965	0.338292	-0.144036	0.103799	-0.0672225	-0.0393615	0.00444801	-0.0176618	-0.243124	0.124766	-0.153416	-0.209144	0.345899		-0.166899	-0.0383624	-0.0430888	0.109085
1653	-0.277973	0.338468	-0.143793	0.103704	-0.0669589	-0.0398462	0.00449992	-0.017786	-0.243626	0.124639	-0.153145	-0.208719	0.343177		-0.166921	-0.0381818	-0.0433216	0.108497
1654	-0.278976	0.338643	-0.143545	0.103599	-0.0666874	-0.0403349	0.00454314	-0.0178979	-0.244122	0.124523	-0.152866	-0.20829	0.340461		-0.166935	-0.0380002	-0.0435592	0.107895
1655	-0.279974	0.338817	-0.143293	0.103483	-0.0664079	-0.0408274	0.00457772	-0.0179974	-0.24461	0.124417	-0.152578	-0.20786	0.337754		-0.166939	-0.0378179	-0.0438015	0.107278
1656	-0.280965	0.33899	-0.143038	0.103357	-0.0661201	-0.0413236	0.0046037	-0.0180846	-0.245091	0.124321	-0.152282	-0.207427	0.335055		-0.166935	-0.0376353	-0.0440485	0.106647
1657	-0.281948	0.339163	-0.142779	0.103221	-0.0658239	-0.0418232	0.00462117	-0.0181594	-0.245566	0.124234	-0.151977	-0.206993	0.332366		-0.166921	-0.0374527	-0.0443001	0.106005
1658	-0.282925	0.339334	-0.142517	0.103074	-0.0655191	-0.0423261	0.00463019	-0.0182219	-0.246034	0.124155	-0.151664	-0.206557	0.329687		-0.166897	-0.0372705	-0.0445563	0.105351
1659	-0.283892	0.339505	-0.142253	0.102916	-0.0652055	-0.0428321	0.00463085	-0.018272	-0.246495	0.124086	-0.151342	-0.20612	0.32702		-0.166863	-0.037089	-0.0448171	0.104688
1660	-0.284851	0.339674	-0.141986	0.102748	-0.0648831	-0.043341	0.00462324	-0.0183099	-0.246949	0.124024	-0.151011	-0.205683	0.324366		-0.16682	-0.0369087	-0.0450822	0.104016
1661	-0.285801	0.339842	-0.141718	0.102569	-0.0645516	-0.0438528	0.00460748	-0.0183356	-0.247397	0.12397	-0.150673	-0.205246	0.321724		-0.166766	-0.0367298	-0.0453518	0.103337
1662	-0.28674	0.340009	-0.141448	0.10238	-0.064211	-0.0443672	0.00458366	-0.0183491	-0.247839	0.123923	-0.150326	-0.204809	0.319096		-0.166701	-0.0365526	-0.0456257	0.102651
1663	-0.287669	0.340174	-0.141178	0.10218	-0.0638611	-0.0448841	0.00455191	-0.0183506	-0.248273	0.123883	-0.149971	-0.204373	0.316483		-0.166626	-0.0363775	-0.0459039	0.10196
1664	-0.288587	0.340338	-0.140906	0.101969	-0.0635018	-0.0454033	0.00451237	-0.0183401	-0.248702	0.12385	-0.149608	-0.203938	0.313886		-0.16654	-0.0362048	-0.0461862	0.101266
1665	-0.289493	0.340501	-0.140634	0.101748	-0.063133	-0.0459247	0.00446518	-0.0183177	-0.249124	0.123822	-0.149237	-0.203504	0.311304		-0.166443	-0.0360347	-0.0464727	0.100569
1666	-0.290387	0.340661	-0.140363	0.101517	-0.0627545	-0.0464482	0.00441049	-0.0182836	-0.24954	0.123799	-0.148859	-0.203072	0.308739		-0.166334	-0.0358676	-0.0467631	0.09987
1667	-0.291268	0.34082	-0.140091	0.101276	-0.0623664	-0.0469736	0.00434848	-0.0182379	-0.249951	0.123782	-0.148473	-0.202642	0.306192		-0.166214	-0.0357036	-0.0470574	0.0991712
1668	-0.292136	0.340978	-0.13982	0.101024	-0.0619684	-0.0475007	0.00427931	-0.0181807	-0.250355	0.123769	-0.14808	-0.202214	0.303663		-0.166083	-0.0355432	-0.0473555	0.0984735
1669	-0.29299	0.341133	-0.139551	0.100762	-0.0615606	-0.0480295	0.00420318	-0.0181122	-0.250754	0.12376	-0.14768	-0.201789	0.301153		-0.16594	-0.0353865	-0.0476574	0.0977781
1670	-0.29383	0.341287	-0.139283	0.100491	-0.0611428	-0.0485597	0.00412027	-0.0180326	-0.251147	0.123754	-0.147273	-0.201367	0.298662		-0.165785	-0.0352337	-0.0479628	0.0970861
1671	-0.294655	0.341439	-0.139016	0.10021	-0.0607149	-0.0490914	0.00403079	-0.017942	-0.251534	0.123751	-0.14686	-0.200949	0.296191		-0.165618	-0.0350852	-0.0482717	0.0963986
1672	-0.295466	0.341588	-0.138752	0.099919	-0.0602769	-0.0496243	0.00393494	-0.0178407	-0.251916	0.12375	-0.14644	-0.200534	0.293739		-0.16544	-0.0349411	-0.0485839	0.0957166
1673	-0.296261	0.341736	-0.13849	0.0996192	-0.0598287	-0.0501583	0.00383293	-0.0177289	-0.252293	0.123752	-0.146015	-0.200122	0.291309		-0.165249	-0.0348017	-0.0488994	0.0950413
1674	-0.29704	0.341881	-0.138231	0.0993103	-0.0593702	-0.0506933	0.00372498	-0.0176068	-0.252664	0.123755	-0.145584	-0.199715	0.2889		-0.165046	-0.0346671	-0.0492179	0.0943735
1675	-0.297803	0.342025	-0.137974	0.0989926	-0.0589014	-0.0512293	0.00361131	-0.0174747	-0.253031	0.123758	-0.145147	-0.199312	0.286512		-0.164831	-0.0345376	-0.0495395	0.093714
1676	-0.298549	0.342166	-0.137721	0.0986664	-0.0584221	-0.0517659	0.00349215	-0.0173329	-0.253393	0.123762	-0.144706	-0.198914	0.284146		-0.164604	-0.0344133	-0.0498639	0.0930637
1677	-0.299279	0.342304	-0.137472	0.0983318	-0.0579323	-0.0523033	0.00336772	-0.0171815	-0.25375	0.123765	-0.144261	-0.19852	0.281801		-0.164364	-0.0342944	-0.050191	0.0924231
1678	-0.299991	0.34244	-0.137226	0.0979892	-0.057432	-0.0528411	0.00323825	-0.017021	-0.254103	0.123768	-0.143811	-0.198131	0.279479		-0.164112	-0.0341812	-0.0505207	0.0917929
1679	-0.300686	0.342574	-0.136985	0.0976389	-0.056921	-0.0533793	0.00310399	-0.0168516	-0.254451	0.12377	-0.143358	-0.197748	0.277179		-0.163848	-0.0340736	-0.0508529	0.0911735
1680	-0.301364	0.342705	-0.136748	0.097281	-0.0563993	-0.0539178	0.00296516	-0.0166737	-0.254795	0.12377	-0.142902	-0.197369	0.274901		-0.163571	-0.033972	-0.0511874	0.0905653
1681	-0.302023	0.342833	-0.136515	0.096916	-0.0558668	-0.0544564	0.00282201	-0.0164876	-0.255135	0.123768	-0.142443	-0.196997	0.272645		-0.163282	-0.0338763	-0.051524	0.0899687
1682	-0.302664	0.342959	-0.136287	0.0965442	-0.0553234	-0.0549951	0.00267479	-0.0162936	-0.255471	0.123762	-0.141982	-0.19663	0.270411		-0.16298	-0.0337868	-0.0518626	0.0893839
1683	-0.303287	0.343081	-0.136065	0.0961658	-0.0547691	-0.0555337	0.00252374	-0.0160922	-0.255803	0.123754	-0.141519	-0.196269	0.268198		-0.162665	-0.0337035	-0.0522031	0.088811
1684	-0.303892	0.343201	-0.135847	0.0957812	-0.0542038	-0.0560722	0.0023691	-0.0158836	-0.256132	0.123742	-0.141054	-0.195915	0.266006		-0.162338	-0.0336266	-0.0525452	0.0882502
1685	-0.304477	0.343317	-0.135635	0.0953909	-0.0536275	-0.0566103	0.00221113	-0.0156684	-0.256458	0.123726	-0.140589	-0.195566	0.263835		-0.161998	-0.033556	-0.0528889	0.0877012
1686	-0.305044	0.34343	-0.135429	0.094995	-0.0530401	-0.057148	0.00205007	-0.0154468	-0.25678	0.123706	-0.140124	-0.195225	0.261685		-0.161645	-0.0334919	-0.0532341	0.0871641
1687	-0.305592	0.343539	-0.135229	0.094594	-0.0524416	-0.0576852	0.00188617	-0.0152192	-0.257099	0.12368	-0.139659	-0.19489	0.259554		-0.161279	-0.0334343	-0.0535804	0.0866384
1688	-0.30612	0.343645	-0.135035	0.0941884	-0.051832	-0.0582218	0.00171967	-0.0149862	-0.257415	0.123649	-0.139195	-0.194562	0.257442		-0.160901	-0.0333832	-0.0539278	0.0861239
1689	-0.30663	0.343747	-0.134847	0.0937783	-0.0512113	-0.0587577	0.00155082	-0.0147481	-0.257729	0.123612	-0.138732	-0.194242	0.25535		-0.160509	-0.0333387	-0.054276	0.0856201
1690	-0.30712	0.343846	-0.134665	0.0933644	-0.0505794	-0.0592928	0.00137986	-0.0145052	-0.25804	0.123569	-0.138271	-0.193929	0.253275		-0.160105	-0.0333008	-0.054625	0.0851263
1691	-0.307591	0.34394	-0.13449	0.0929468	-0.0499363	-0.0598271	0.00120703	-0.0142582	-0.258349	0.12352	-0.137812	-0.193624	0.251218		-0.159687	-0.0332694	-0.0549745	0.0846421
1692	-0.308042	0.344031	-0.134321	0.0925262	-0.0492822	-0.0603604	0.00103255	-0.0140073	-0.258656	0.123463	-0.137356	-0.193326	0.249178		-0.159257	-0.0332447	-0.0553244	0.0841667
1693	-0.308475	0.344117	-0.134159	0.0921027	-0.0486169	-0.0608926	0.000856643	-0.013753	-0.25896	0.1234	-0.136903	-0.193037	0.247153		-0.158813	-0.0332265	-0.0556745	0.0836993
1694	-0.308888	0.344199	-0.134004	0.0916769	-0.0479406	-0.0614237	0.000679534	-0.0134958	-0.259263	0.123329	-0.136454	-0.192756	0.245144		-0.158356	-0.0332149	-0.0560245	0.0832393
1695	-0.309281	0.344277	-0.133856	0.0912492	-0.0472533	-0.0619536	0.00050143	-0.0132362	-0.259565	0.12325	-0.136008	-0.192483	0.243149		-0.157886	-0.0332097	-0.0563744	0.0827856
1696	-0.309656	0.344349	-0.133715	0.09082	-0.046555	-0.0624823	0.000322538	-0.0129744	-0.259864	0.123162	-0.135567	-0.192219	0.241169		-0.157402	-0.033211	-0.0567239	0.0823376
1697	-0.310012	0.344418	-0.133581	0.0903896	-0.0458459	-0.0630097	0.00014306	-0.0127111	-0.260163	0.123067	-0.13513	-0.191964	0.239201		-0.156905	-0.0332186	-0.0570729	0.0818942
1698	-0.310348	0.344481	-0.133454	0.0899584	-0.0451259	-0.0635356	-3.68052e-05	-0.0124466	-0.26046	0.122962	-0.134698	-0.191718	0.237246		-0.156395	-0.0332325	-0.0574211	0.0814545
1699	-0.310666	0.34454	-0.133334	0.0895269	-0.0443953	-0.0640602	-0.000216866	-0.0121815	-0.260756	0.122849	-0.134272	-0.191481	0.235303		-0.155871	-0.0332525	-0.0577684	0.0810177
1700	-0.310965	0.344593	-0.133222	0.0890955	-0.0436542	-0.0645833	-0.000396937	-0.0119161	-0.261051	0.122726	-0.133851	-0.191254	0.233372		-0.155334	-0.0332784	-0.0581147	0.0805829
1701	-0.311246	0.344641	-0.133117	0.0886645	-0.0429025	-0.0651048	-0.000576837	-0.0116509	-0.261346	0.122594	-0.133436	-0.191036	0.23145		-0.154783	-0.0333103	-0.0584596	0.0801491
1702	-0.311508	0.344684	-0.133019	0.0882344	-0.0421406	-0.0656248	-0.000756391	-0.0113863	-0.26164	0.122452	-0.133027	-0.190828	0.229539		-0.154218	-0.0333478	-0.0588031	0.0797154
1703	-0.311752	0.344722	-0.132929	0.0878055	-0.0413686	-0.0661432	-0.000935428	-0.0111228	-0.261934	0.1223	-0.132624	-0.190629	0.227636		-0.15364	-0.0333908	-0.059145	0.0792811
1704	-0.311978	0.344754	-0.132846	0.0873782	-0.0405866	-0.06666	-0.00111378	-0.0108609	-0.262228	0.122138	-0.132229	-0.190441	0.225742		-0.153048	-0.0334392	-0.0594851	0.0788453
1705	-0.312186	0.34478	-0.132771	0.0869529	-0.0397949	-0.0671751	-0.00129127	-0.0106009	-0.262522	0.121966	-0.13184	-0.190262	0.223855		-0.152442	-0.0334928	-0.0598232	0.0784071
1706	-0.312377	0.344801	-0.132703	0.08653	-0.0389935	-0.0676885	-0.00146775	-0.0103434	-0.262816	0.121783	-0.131457	-0.190093	0.221976		-0.151823	-0.0335513	-0.0601592	0.0779657
1707	-0.31255	0.344816	-0.132643	0.0861097	-0.0381829	-0.0682002	-0.00164304	-0.0100886	-0.26311	0.121589	-0.131083	-0.189935	0.220103		-0.15119	-0.0336145	-0.0604929	0.0775203
1708	-0.312707	0.344825	-0.13259	0.0856926	-0.0373631	-0.0687103	-0.00181698	-0.00983719	-0.263404	0.121385	-0.130715	-0.189787	0.218237		-0.150543	-0.0336822	-0.0608242	0.0770703
1709	-0.312847	0.344828	-0.132545	0.085279	-0.0365344	-0.0692186	-0.00198943	-0.00958942	-0.263699	0.121169	-0.130355	-0.189649	0.216376		-0.149883	-0.0337542	-0.0611528	0.0766148
1710	-0.312971	0.344825	-0.132508	0.0848691	-0.035697	-0.0697253	-0.00216023	-0.00934574	-0.263995	0.120942	-0.130003	-0.189522	0.214519		-0.149209	-0.0338302	-0.0614787	0.0761531
1711	-0.313078	0.344815	-0.132478	0.0844635	-0.0348512	-0.0702302	-0.00232923	-0.00910658	-0.264291	0.120704	-0.129659	-0.189405	0.212668		-0.148521	-0.0339099	-0.0618018	0.0756847
1712	-0.31317	0.3448	-0.132455	0.0840623	-0.0339973	-0.0707335	-0.0024963	-0.00887232	-0.264588	0.120455	-0.129322	-0.189299	0.210821		-0.14782	-0.0339932	-0.0621217	0.0752088
1713	-0.313247	0.344778	-0.13244	0.0836661	-0.0331356	-0.0712351	-0.00266129	-0.00864337	-0.264887	0.120194	-0.128994	-0.189203	0.208977		-0.147105	-0.0340797	-0.0624386	0.0747248
1714	-0.313308	0.34475	-0.132432	0.0832751	-0.0322664	-0.071735	-0.00282407	-0.00842011	-0.265186	0.119921	-0.128675	-0.189118	0.207138		-0.146377	-0.0341691	-0.0627521	0.074232
1715	-0.313355	0.344716	-0.132432	0.0828897	-0.0313899	-0.0722333	-0.00298452	-0.00820291	-0.265487	0.119637	-0.128364	-0.189043	0.205301		-0.145636	-0.0342612	-0.0630623	0.0737299
1716	-0.313388	0.344675	-0.132438	0.0825102	-0.0305066	-0.07273	-0.00314249	-0.00799215	-0.265789	0.119341	-0.128061	-0.188978	0.203468		-0.144881	-0.0343556	-0.063369	0.0732179
1717	-0.313406	0.344628	-0.132452	0.082137	-0.0296168	-0.0732252	-0.00329789	-0.00778817	-0.266093	0.119032	-0.127768	-0.188924	0.201638		-0.144114	-0.0344521	-0.0636721	0.0726954
1718	-0.313412	0.344574	-0.132474	0.0817704	-0.0287208	-0.0737188	-0.00345057	-0.00759134	-0.266398	0.118712	-0.127483	-0.188881	0.19981		-0.143334	-0.0345505	-0.0639715	0.072162
1719	-0.313404	0.344514	-0.132502	0.0814107	-0.027819	-0.074211	-0.00360044	-0.00740197	-0.266704	0.11838	-0.127208	-0.188847	0.197985		-0.142541	-0.0346503	-0.0642671	0.0716172
1720	-0.313383	0.344447	-0.132537	0.0810583	-0.0269118	-0.0747018	-0.00374737	-0.00722041	-0.267013	0.118035	-0.126942	-0.188824	0.196163		-0.141736	-0.0347513	-0.0645589	0.0710607
1721	-0.31335	0.344374	-0.132579	0.0807133	-0.0259997	-0.0751912	-0.00389125	-0.00704695	-0.267323	0.117678	-0.126685	-0.188811	0.194344		-0.140918	-0.0348533	-0.0648466	0.070492
1722	-0.313305	0.344294	-0.132628	0.0803762	-0.025083	-0.0756793	-0.00403198	-0.0068819	-0.267635	0.117309	-0.126438	-0.188808	0.192526		-0.140089	-0.0349559	-0.0651303	0.0699109
1723	-0.313248	0.344207	-0.132683	0.0800473	-0.0241623	-0.0761662	-0.00416946	-0.00672554	-0.267949	0.116928	-0.126201	-0.188814	0.190712		-0.139248	-0.0350589	-0.0654099	0.0693171
1724	-0.31318	0.344114	-0.132745	0.0797267	-0.0232379	-0.0766519	-0.00430359	-0.00657814	-0.268265	0.116534	-0.125974	-0.188831	0.188899		-0.138396	-0.0351619	-0.0656852	0.0687103
1725	-0.313101	0.344013	-0.132813	0.0794148	-0.0223104	-0.0771364	-0.00443428	-0.00643995	-0.268582	0.116127	-0.125756	-0.188856	0.18709		-0.137532	-0.0352648	-0.0659563	0.0680902
1726	-0.313012	0.343906	-0.132887	0.0791119	-0.0213802	-0.07762	-0.00456146	-0.00631121	-0.268902	0.115708	-0.125549	-0.188891	0.185282		-0.136658	-0.0353672	-0.0662229	0.0674566
1727	-0.312913	0.343792	-0.132967	0.0788182	-0.0204477	-0.0781025	-0.00468505	-0.00619215	-0.269225	0.115276	-0.125352	-0.188936	0.183478		-0.135773	-0.0354689	-0.0664851	0.0668092
1728	-0.312805	0.34367	-0.133053	0.0785339	-0.0195136	-0.0785842	-0.00480497	-0.00608297	-0.269549	0.114831	-0.125165	-0.188989	0.181676		-0.134879	-0.0355695	-0.0667427	0.0661477
1729	-0.312687	0.343542	-0.133145	0.0782592	-0.0185784	-0.079065	-0.00492117	-0.00598386	-0.269875	0.114374	-0.124989	-0.189051	0.179878		-0.133974	-0.035669	-0.0669957	0.0654721
1730	-0.312561	0.343407	-0.133242	0.0779945	-0.0176424	-0.0795451	-0.00503359	-0.00589501	-0.270204	0.113903	-0.124823	-0.189121	0.178082		-0.13306	-0.0357669	-0.0672441	0.0647821
1731	-0.312426	0.343265	-0.133344	0.0777398	-0.0167064	-0.0800245	-0.00514219	-0.00581657	-0.270535	0.11342	-0.124669	-0.1892	0.176289		-0.132137	-0.0358632	-0.0674877	0.0640773
1732	-0.312284	0.343115	-0.133452	0.0774955	-0.0157708	-0.0805033	-0.00524692	-0.00574868	-0.270868	0.112923	-0.124525	-0.189287	0.174501		-0.131205	-0.0359575	-0.0677264	0.0633577
1733	-0.312134	0.342959	-0.133564	0.0772616	-0.0148362	-0.0809817	-0.00534775	-0.00569148	-0.271203	0.112414	-0.124393	-0.189382	0.172715		-0.130266	-0.0360496	-0.0679603	0.062623
1734	-0.311977	0.342795	-0.133681	0.0770384	-0.0139031	-0.0814596	-0.00544467	-0.00564508	-0.271541	0.111891	-0.124272	-0.189485	0.170934		-0.129318	-0.0361393	-0.0681892	0.0618729
1735	-0.311814	0.342624	-0.133802	0.0768261	-0.0129722	-0.0819373	-0.00553767	-0.00560956	-0.27188	0.111355	-0.124162	-0.189595	0.169157		-0.128363	-0.0362265	-0.0684131	0.0611072
1736	-0.311645	0.342446	-0.133927	0.0766247	-0.0120439	-0.0824147	-0.00562673	-0.005585	-0.272222	0.110806	-0.124064	-0.189713	0.167384		-0.127401	-0.0363108	-0.0686319	0.0603257
1737	-0.31147	0.342261	-0.134056	0.0764344	-0.0111188	-0.082892	-0.00571187	-0.00557146	-0.272566	0.110243	-0.123978	-0.189838	0.165615		-0.126432	-0.0363922	-0.0688456	0.059528
1738	-0.311289	0.342069	-0.134189	0.0762554	-0.0101977	-0.0833693	-0.00579311	-0.00556897	-0.272912	0.109667	-0.123904	-0.189969	0.163851		-0.125458	-0.0364705	-0.0690541	0.0587139
1739	-0.311104	0.341869	-0.134325	0.0760876	-0.00928088	-0.0838468	-0.00587047	-0.00557756	-0.27326	0.109077	-0.123842	-0.190107	0.162091		-0.124477	-0.0365454	-0.0692574	0.0578829
1740	-0.310914	0.341662	-0.134464	0.0759313	-0.00836909	-0.0843245	-0.00594399	-0.00559723	-0.27361	0.108474	-0.123793	-0.190252	0.160337		-0.123492	-0.0366168	-0.0694553	0.0570347
1741	-0.31072	0.341448	-0.134606	0.0757865	-0.00746287	-0.0848025	-0.00601372	-0.00562797	-0.273961	0.107858	-0.123755	-0.190403	0.158587		-0.122502	-0.0366846	-0.0696479	0.0561687
1742	-0.310522	0.341227	-0.13475	0.0756532	-0.0065628	-0.0852809	-0.00607972	-0.00566976	-0.274315	0.107228	-0.123731	-0.190559	0.156843		-0.121508	-0.0367486	-0.0698351	0.0552845
1743	-0.310321	0.340998	-0.134897	0.0755315	-0.00566945	-0.08576	-0.00614205	-0.00572255	-0.27467	0.106584	-0.123718	-0.190722	0.155104		-0.12051	-0.0368086	-0.0700168	0.0543816
1744	-0.310118	0.340762	-0.135046	0.0754213	-0.00478338	-0.0862396	-0.0062008	-0.0057863	-0.275027	0.105927	-0.123719	-0.190889	0.153371		-0.119508	-0.0368645	-0.070193	0.0534594
1745	-0.309911	0.340519	-0.135197	0.0753228	-0.00390515	-0.08672	-0.00625605	-0.00586094	-0.275385	0.105256	-0.123732	-0.191062	0.151643		-0.118504	-0.036916	-0.0703638	0.0525173
1746	-0.309702	0.340268	-0.135349	0.0752357	-0.00303531	-0.0872013	-0.00630789	-0.00594639	-0.275745	0.104572	-0.123757	-0.191239	0.149922		-0.117498	-0.0369631	-0.0705289	0.0515548
1747	-0.309492	0.34001	-0.135502	0.0751602	-0.00217439	-0.0876835	-0.00635645	-0.00604256	-0.276105	0.103873	-0.123795	-0.191421	0.148207		-0.11649	-0.0370055	-0.0706885	0.0505711
1748	-0.30928	0.339745	-0.135656	0.0750962	-0.00132293	-0.0881667	-0.00640184	-0.00614934	-0.276467	0.103161	-0.123846	-0.191607	0.146498		-0.11548	-0.037043	-0.0708426	0.0495656
1749	-0.309067	0.339472	-0.135811	0.0750436	-0.000481433	-0.0886511	-0.00644419	-0.00626661	-0.27683	0.102435	-0.123909	-0.191797	0.144796		-0.114469	-0.0370753	-0.0709909	0.0485377
1750	-0.308853	0.339192	-0.135966	0.0750023	0.000349594	-0.0891368	-0.00648366	-0.00639423	-0.277194	0.101695	-0.123985	-0.191991	0.143101		-0.113458	-0.0371023	-0.0711337	0.0474866
1751	-0.308638	0.338905	-0.136121	0.0749723	0.00116967	-0.0896238	-0.0065204	-0.00653207	-0.277559	0.100942	-0.124072	-0.192188	0.141412		-0.112448	-0.0371237	-0.0712708	0.0464117
1752	-0.308424	0.33861	-0.136276	0.0749534	0.00197834	-0.0901122	-0.00655458	-0.00667995	-0.277924	0.100174	-0.124173	-0.192388	0.139731		-0.111437	-0.0371393	-0.0714022	0.0453122
1753	-0.30821	0.338308	-0.13643	0.0749454	0.00277514	-0.0906021	-0.00658638	-0.0068377	-0.278289	0.0993928	-0.124285	-0.192591	0.138058		-0.110428	-0.0371489	-0.0715279	0.0441874
1754	-0.307996	0.337999	-0.136583	0.0749484	0.00355967	-0.0910936	-0.00661597	-0.00700515	-0.278654	0.0985975	-0.124409	-0.192797	0.136392		-0.10942	-0.0371522	-0.071648	0.0430365
1755	-0.307783	0.337682	-0.136735	0.074962	0.00433152	-0.0915869	-0.00664355	-0.00718209	-0.27902	0.0977884	-0.124544	-0.193004	0.134734		-0.108414	-0.0371492	-0.0717623	0.041859
1756	-0.307571	0.337358	-0.136885	0.0749861	0.00509031	-0.0920819	-0.00666932	-0.00736832	-0.279385	0.0969654	-0.124691	-0.193214	0.133084		-0.10741	-0.0371395	-0.0718709	0.0406542
1757	-0.307361	0.337026	-0.137033	0.0750206	0.00583569	-0.0925788	-0.00669348	-0.00756362	-0.27975	0.0961286	-0.124849	-0.193425	0.131443		-0.10641	-0.037123	-0.0719738	0.0394213
1758	-0.307153	0.336688	-0.137178	0.0750652	0.00656732	-0.0930777	-0.00671624	-0.00776775	-0.280115	0.095278	-0.125017	-0.193638	0.129811		-0.105412	-0.0370997	-0.0720711	0.0381598
1759	-0.306946	0.336342	-0.137321	0.0751197	0.00728488	-0.0935785	-0.00673782	-0.00798048	-0.280479	0.0944136	-0.125196	-0.193851	0.128189		-0.104418	-0.0370692	-0.0721626	0.036869
1760	-0.306742	0.335989	-0.137461	0.075184	0.00798809	-0.0940814	-0.00675842	-0.00820157	-0.280842	0.0935354	-0.125385	-0.194066	0.126576		-0.103428	-0.0370316	-0.0722484	0.0355486
1761	-0.30654	0.335628	-0.137597	0.0752577	0.00867665	-0.0945865	-0.00677827	-0.00843075	-0.281203	0.0926436	-0.125582	-0.194281	0.124973		-0.102443	-0.0369866	-0.0723286	0.034198
1762	-0.306342	0.33526	-0.13773	0.0753407	0.00935032	-0.0950937	-0.00679759	-0.00866777	-0.281564	0.0917381	-0.125789	-0.194496	0.123381		-0.101463	-0.0369342	-0.0724031	0.0328168
1763	-0.306146	0.334886	-0.137858	0.0754327	0.0100088	-0.0956031	-0.0068166	-0.00891235	-0.281923	0.0908192	-0.126004	-0.194712	0.121801		-0.100488	-0.0368742	-0.072472	0.0314046
1764	-0.305954	0.334504	-0.137982	0.0755334	0.010652	-0.0961148	-0.00683552	-0.00916421	-0.28228	0.0898868	-0.126227	-0.194927	0.120231		-0.0995184	-0.0368066	-0.0725353	0.0299611
1765	-0.305765	0.334115	-0.138101	0.0756425	0.0112796	-0.0966287	-0.00685458	-0.00942307	-0.282636	0.088941	-0.126457	-0.195142	0.118674		-0.098555	-0.0367314	-0.0725929	0.028486
1766	-0.30558	0.333719	-0.138214	0.0757597	0.0118915	-0.097145	-0.00687399	-0.00968864	-0.282989	0.0879821	-0.126693	-0.195356	0.11713		-0.0975981	-0.0366484	-0.072645	0.0269792
1767	-0.305399	0.333316	-0.138323	0.0758848	0.0124875	-0.0976636	-0.00689397	-0.0099606	-0.28334	0.0870102	-0.126935	-0.19557	0.1156		-0.0966478	-0.0365576	-0.0726916	0.0254404
1768	-0.305223	0.332906	-0.138425	0.0760174	0.0130675	-0.0981845	-0.00691474	-0.0102386	-0.283689	0.0860253	-0.127182	-0.195783	0.114083		-0.0957045	-0.0364591	-0.0727327	0.0238695
1769	-0.30505	0.332489	-0.138521	0.0761573	0.0136314	-0.0987077	-0.0069365	-0.0105224	-0.284035	0.0850277	-0.127433	-0.195994	0.112581		-0.0947685	-0.0363527	-0.0727683	0.0222664
1770	-0.304883	0.332065	-0.13861	0.0763039	0.0141791	-0.0992332	-0.00695946	-0.0108117	-0.284378	0.0840175	-0.127688	-0.196205	0.111095		-0.0938402	-0.0362385	-0.0727984	0.020631
1771	-0.30472	0.331634	-0.138693	0.0764572	0.0147105	-0.0997611	-0.0069838	-0.011106	-0.284718	0.082995	-0.127945	-0.196414	0.109624		-0.0929196	-0.0361165	-0.0728232	0.0189635
1772	-0.304562	0.331197	-0.138768	0.0766166	0.0152255	-0.100291	-0.00700972	-0.0114052	-0.285054	0.0819604	-0.128203	-0.196621	0.10817		-0.0920071	-0.0359867	-0.0728426	0.0172638
1773	-0.304409	0.330753	-0.138835	0.0767819	0.0157241	-0.100824	-0.0070374	-0.0117087	-0.285387	0.0809139	-0.128463	-0.196827	0.106733		-0.091103	-0.0358492	-0.0728567	0.015532
1774	-0.304262	0.330302	-0.138895	0.0769528	0.0162064	-0.101358	-0.00706703	-0.0120163	-0.285717	0.0798558	-0.128722	-0.197031	0.105314		-0.0902073	-0.0357041	-0.0728655	0.0137682
1775	-0.304119	0.329845	-0.138946	0.0771288	0.0166723	-0.101895	-0.00709877	-0.0123276	-0.286042	0.0787863	-0.12898	-0.197233	0.103913		-0.0893203	-0.0355513	-0.0728692	0.0119726
1776	-0.303983	0.329381	-0.138989	0.0773096	0.0171218	-0.102434	-0.00713281	-0.0126422	-0.286364	0.0777057	-0.129235	-0.197434	0.102531		-0.0884422	-0.0353909	-0.0728677	0.0101453
1777	-0.303851	0.32891	-0.139023	0.0774948	0.017555	-0.102975	-0.0071693	-0.0129599	-0.286681	0.0766144	-0.129488	-0.197632	0.101168		-0.0875731	-0.0352232	-0.0728612	0.00828661
1778	-0.303726	0.328434	-0.139047	0.0776842	0.017972	-0.103518	-0.00720843	-0.0132801	-0.286993	0.0755127	-0.129737	-0.197828	0.0998251		-0.086713	-0.035048	-0.0728496	0.00639676
1779	-0.303606	0.327951	-0.139062	0.0778773	0.0183729	-0.104062	-0.00725035	-0.0136026	-0.287301	0.0744009	-0.12998	-0.198022	0.0985023		-0.0858622	-0.0348656	-0.0728331	0.00447601
1780	-0.303492	0.327462	-0.139068	0.0780738	0.0187576	-0.104609	-0.00729525	-0.013927	-0.287604	0.0732793	-0.130217	-0.198214	0.0972001		-0.0850207	-0.0346761	-0.0728117	0.00252468
1781	-0.303383	0.326967	-0.139064	0.0782733	0.0191265	-0.105157	-0.00734327	-0.0142528	-0.287902	0.0721484	-0.130447	-0.198404	0.0959192		-0.0841885	-0.0344795	-0.0727855	0.000543134
1782	-0.303281	0.326466	-0.139049	0.0784755	0.0194795	-0.105707	-0.00739459	-0.0145796	-0.288195	0.0710086	-0.130669	-0.198592	0.0946597		-0.0833657	-0.0342761	-0.0727547	-0.00146825
1783	-0.303184	0.325959	-0.139024	0.0786801	0.0198169	-0.106259	-0.00744937	-0.0149072	-0.288482	0.0698602	-0.130881	-0.198778	0.0934222		-0.0825522	-0.0340661	-0.0727191	-0.00350906
1784	-0.303093	0.325447	-0.138988	0.0788866	0.0201388	-0.106812	-0.00750778	-0.0152351	-0.288763	0.0687037	-0.131082	-0.198961	0.0922069		-0.0817481	-0.0338494	-0.0726791	-0.00557885
1785	-0.303008	0.324929	-0.138941	0.0790948	0.0204453	-0.107366	-0.00756997	-0.0155628	-0.289039	0.0675395	-0.131272	-0.199143	0.0910142		-0.0809533	-0.0336265	-0.0726345	-0.00767713
1786	-0.302929	0.324405	-0.138883	0.0793044	0.0207368	-0.107922	-0.0076361	-0.0158901	-0.289309	0.0663682	-0.131449	-0.199322	0.0898443		-0.0801678	-0.0333973	-0.0725856	-0.0098034
1787	-0.302855	0.323877	-0.138814	0.0795149	0.0210133	-0.108478	-0.00770633	-0.0162164	-0.289572	0.0651901	-0.131612	-0.1995	0.0886975		-0.0793915	-0.0331622	-0.0725325	-0.0119571
1788	-0.302787	0.323343	-0.138733	0.0797261	0.0212751	-0.109036	-0.0077808	-0.0165415	-0.289829	0.0640058	-0.13176	-0.199675	0.0875741		-0.0786244	-0.0329213	-0.0724751	-0.0141375
1789	-0.302725	0.322804	-0.138641	0.0799376	0.0215224	-0.109594	-0.00785969	-0.0168648	-0.29008	0.0628158	-0.131892	-0.199849	0.0864743		-0.0778662	-0.0326748	-0.0724136	-0.016344
1790	-0.302668	0.322261	-0.138537	0.0801492	0.0217553	-0.110153	-0.00794312	-0.0171859	-0.290324	0.0616206	-0.132006	-0.200021	0.0853985		-0.077117	-0.0324229	-0.0723481	-0.0185759
1791	-0.302617	0.321713	-0.138421	0.0803605	0.0219742	-0.110713	-0.00803124	-0.0175046	-0.290561	0.0604208	-0.132103	-0.200192	0.0843469		-0.0763765	-0.032166	-0.0722786	-0.0208324
1792	-0.302571	0.321161	-0.138293	0.0805711	0.0221791	-0.111273	-0.00812421	-0.0178203	-0.290791	0.0592168	-0.13218	-0.20036	0.0833198		-0.0756446	-0.0319041	-0.0722053	-0.0231127
1793	-0.302531	0.320604	-0.138154	0.0807809	0.0223703	-0.111833	-0.00822216	-0.0181327	-0.291014	0.0580094	-0.132236	-0.200528	0.0823173		-0.0749211	-0.0316375	-0.0721283	-0.0254158
1794	-0.302496	0.320043	-0.138002	0.0809895	0.022548	-0.112393	-0.00832523	-0.0184414	-0.29123	0.0567989	-0.132271	-0.200695	0.0813398		-0.0742059	-0.0313665	-0.0720477	-0.0277409
1795	-0.302466	0.319479	-0.137837	0.0811966	0.0227124	-0.112953	-0.00843355	-0.018746	-0.291439	0.0555861	-0.132283	-0.20086	0.0803875		-0.0734987	-0.0310913	-0.0719634	-0.030087
1796	-0.302441	0.31891	-0.137661	0.0814019	0.0228636	-0.113513	-0.00854725	-0.019046	-0.29164	0.0543714	-0.132272	-0.201024	0.0794606		-0.0727994	-0.0308122	-0.0718757	-0.032453
1797	-0.30242	0.318339	-0.137472	0.0816052	0.023002	-0.114072	-0.00866643	-0.0193412	-0.291834	0.0531556	-0.132236	-0.201188	0.0785592		-0.0721078	-0.0305293	-0.0717846	-0.0348378
1798	-0.302405	0.317763	-0.137271	0.0818061	0.0231277	-0.114631	-0.00879122	-0.0196311	-0.29202	0.0519393	-0.132174	-0.201351	0.0776837		-0.0714235	-0.0302431	-0.0716903	-0.0372403
1799	-0.302394	0.317185	-0.137058	0.0820044	0.023241	-0.115189	-0.00892171	-0.0199153	-0.292199	0.050723	-0.132086	-0.201513	0.0768341		-0.0707464	-0.0299537	-0.0715928	-0.0396593
1800	-0.302388	0.316604	-0.136832	0.0821999	0.0233419	-0.115746	-0.00905799	-0.0201935	-0.29237	0.0495074	-0.131971	-0.201676	0.0760106		-0.0700763	-0.0296614	-0.0714922	-0.0420937
1801	-0.302386	0.316019	-0.136595	0.0823923	0.0234308	-0.116302	-0.00920014	-0.0204654	-0.292533	0.0482931	-0.131827	-0.201838	0.0752134		-0.0694129	-0.0293666	-0.0713886	-0.0445422
1802	-0.302387	0.315432	-0.136344	0.0825814	0.0235079	-0.116856	-0.00934825	-0.0207305	-0.292689	0.0470808	-0.131655	-0.202	0.0744425		-0.068756	-0.0290693	-0.0712821	-0.0470037
1803	-0.302393	0.314843	-0.136082	0.082767	0.0235734	-0.117408	-0.00950236	-0.0209885	-0.292836	0.0458711	-0.131452	-0.202162	0.0736982		-0.0681052	-0.0287701	-0.0711728	-0.0494768
1804	-0.302403	0.314251	-0.135807	0.0829488	0.0236275	-0.117959	-0.00966254	-0.0212391	-0.292976	0.0446647	-0.131219	-0.202325	0.0729805		-0.0674605	-0.028469	-0.0710608	-0.0519604
1805	-0.302416	0.313658	-0.13552	0.0831266	0.0236704	-0.118508	-0.00982883	-0.021482	-0.293108	0.0434623	-0.130955	-0.202488	0.0722895		-0.0668215	-0.0281666	-0.0709463	-0.054453
1806	-0.302432	0.313062	-0.135222	0.0833003	0.0237024	-0.119054	-0.0100012	-0.0217168	-0.293231	0.0422644	-0.130659	-0.202652	0.0716253		-0.066188	-0.0278629	-0.0708293	-0.0569533
1807	-0.302452	0.312464	-0.134911	0.0834697	0.0237238	-0.119598	-0.0101798	-0.0219432	-0.293347	0.0410718	-0.13033	-0.202817	0.0709881		-0.0655598	-0.0275584	-0.0707099	-0.05946
1808	-0.302474	0.311865	-0.134588	0.0836346	0.0237347	-0.120139	-0.0103645	-0.022161	-0.293455	0.0398851	-0.129968	-0.202983	0.0703778		-0.0649366	-0.0272534	-0.0705882	-0.0619717
1809	-0.302499	0.311264	-0.134253	0.0837948	0.0237354	-0.120677	-0.0105554	-0.0223699	-0.293555	0.0387049	-0.129573	-0.20315	0.0697946		-0.0643182	-0.0269483	-0.0704644	-0.064487
1810	-0.302527	0.310662	-0.133907	0.0839501	0.0237261	-0.121212	-0.0107524	-0.0225695	-0.293646	0.037532	-0.129143	-0.203318	0.0692385		-0.0637044	-0.0266432	-0.0703385	-0.0670046
1811	-0.302557	0.310058	-0.133549	0.0841005	0.0237071	-0.121743	-0.0109556	-0.0227597	-0.29373	0.0363669	-0.128679	-0.203488	0.0687094		-0.0630949	-0.0263387	-0.0702107	-0.0695229
1812	-0.302588	0.309454	-0.13318	0.0842457	0.0236787	-0.122271	-0.0111647	-0.0229402	-0.293806	0.0352103	-0.12818	-0.20366	0.0682074		-0.0624896	-0.026035	-0.0700811	-0.0720407
1813	-0.302622	0.308848	-0.132799	0.0843857	0.023641	-0.122794	-0.01138	-0.0231108	-0.293873	0.0340628	-0.127646	-0.203834	0.0677324		-0.0618882	-0.0257324	-0.0699498	-0.0745565
1814	-0.302657	0.308242	-0.132407	0.0845204	0.0235943	-0.123313	-0.0116011	-0.0232713	-0.293933	0.0329251	-0.127076	-0.204009	0.0672843		-0.0612905	-0.0254314	-0.0698168	-0.077069
1815	-0.302693	0.307635	-0.132004	0.0846495	0.0235388	-0.123828	-0.0118282	-0.0234213	-0.293985	0.0317976	-0.126471	-0.204187	0.0668632		-0.0606963	-0.0251322	-0.0696824	-0.0795767
1816	-0.302731	0.307027	-0.131591	0.0847731	0.0234749	-0.124338	-0.012061	-0.0235609	-0.294029	0.0306811	-0.12583	-0.204367	0.0664687		-0.0601054	-0.0248351	-0.0695466	-0.0820783
1817	-0.302769	0.306419	-0.131167	0.0848911	0.0234027	-0.124843	-0.0122995	-0.0236897	-0.294065	0.0295761	-0.125153	-0.204549	0.0661009		-0.0595177	-0.0245406	-0.0694096	-0.0845722
1818	-0.302807	0.305811	-0.130732	0.0850033	0.0233225	-0.125342	-0.0125437	-0.0238077	-0.294094	0.0284832	-0.124441	-0.204734	0.0657595		-0.0589329	-0.0242489	-0.0692714	-0.0870572
1819	-0.302845	0.305203	-0.130287	0.0851096	0.0232346	-0.125836	-0.0127933	-0.0239146	-0.294115	0.0274029	-0.123693	-0.204922	0.0654444		-0.0583509	-0.0239603	-0.0691321	-0.0895318
1820	-0.302884	0.304594	-0.129832	0.0852101	0.0231392	-0.126324	-0.0130482	-0.0240104	-0.294128	0.0263358	-0.122909	-0.205112	0.0651552		-0.0577716	-0.0236751	-0.0689919	-0.0919945
1821	-0.302921	0.303986	-0.129366	0.0853047	0.0230365	-0.126807	-0.0133084	-0.0240949	-0.294134	0.0252824	-0.122091	-0.205305	0.0648917		-0.0571947	-0.0233938	-0.0688509	-0.0944438
1822	-0.302958	0.303377	-0.128891	0.0853932	0.0229269	-0.127282	-0.0135736	-0.0241681	-0.294132	0.0242432	-0.121237	-0.205502	0.0646536		-0.0566201	-0.0231165	-0.0687091	-0.0968782
1823	-0.302993	0.302769	-0.128407	0.0854758	0.0228106	-0.127751	-0.0138438	-0.0242299	-0.294123	0.0232186	-0.120348	-0.205701	0.0644405		-0.0560477	-0.0228435	-0.0685667	-0.0992963
1824	-0.303027	0.302162	-0.127912	0.0855523	0.0226879	-0.128213	-0.0141186	-0.0242802	-0.294106	0.0222092	-0.119426	-0.205904	0.0642522		-0.0554773	-0.0225753	-0.0684238	-0.101697
1825	-0.303059	0.301554	-0.127409	0.0856227	0.022559	-0.128668	-0.014398	-0.024319	-0.294082	0.0212154	-0.118469	-0.20611	0.0640881		-0.0549089	-0.0223119	-0.0682804	-0.104078
1826	-0.303089	0.300947	-0.126896	0.0856871	0.0224241	-0.129116	-0.0146818	-0.0243462	-0.294052	0.0202376	-0.117479	-0.206319	0.0639478		-0.0543423	-0.0220538	-0.0681366	-0.106438
1827	-0.303116	0.300341	-0.126374	0.0857454	0.0222836	-0.129556	-0.0149698	-0.024362	-0.294014	0.0192763	-0.116457	-0.206532	0.0638309		-0.0537774	-0.0218012	-0.0679925	-0.108776
1828	-0.30314	0.299736	-0.125843	0.0857976	0.0221377	-0.129988	-0.0152618	-0.0243662	-0.29397	0.0183318	-0.115403	-0.206748	0.0637367		-0.0532141	-0.0215542	-0.0678482	-0.11109
1829	-0.303161	0.299131	-0.125304	0.0858439	0.0219867	-0.130412	-0.0155576	-0.0243589	-0.293918	0.0174045	-0.114318	-0.206969	0.0636647		-0.0526523	-0.0213133	-0.0677038	-0.11338
1830	-0.303178	0.298527	-0.124756	0.0858841	0.0218308	-0.130828	-0.0158569	-0.0243403	-0.29386	0.0164947	-0.113202	-0.207192	0.0636142		-0.0520921	-0.0210784	-0.0675592	-0.115643
1831	-0.303191	0.297924	-0.124199	0.0859184	0.0216703	-0.131235	-0.0161596	-0.0243104	-0.293796	0.0156028	-0.112056	-0.20742	0.0635845		-0.0515332	-0.02085	-0.0674145	-0.11788
1832	-0.3032	0.297323	-0.123634	0.0859468	0.0215055	-0.131634	-0.0164654	-0.0242692	-0.293725	0.014729	-0.110882	-0.207652	0.0635749		-0.0509758	-0.0206281	-0.0672699	-0.120087
1833	-0.303204	0.296722	-0.123061	0.0859694	0.0213367	-0.132023	-0.0167741	-0.024217	-0.293648	0.0138737	-0.10968	-0.207888	0.0635847		-0.0504197	-0.0204129	-0.0671252	-0.122265
1834	-0.303203	0.296122	-0.12248	0.0859862	0.021164	-0.132403	-0.0170854	-0.0241538	-0.293564	0.013037	-0.108451	-0.208127	0.0636129		-0.0498649	-0.0202047	-0.0669806	-0.124412
1835	-0.303196	0.295524	-0.121891	0.0859972	0.0209878	-0.132774	-0.0173991	-0.0240798	-0.293474	0.0122192	-0.107196	-0.208371	0.0636587		-0.0493114	-0.0200035	-0.066836	-0.126527
1836	-0.303183	0.294926	-0.121294	0.0860027	0.0208084	-0.133135	-0.0177149	-0.0239953	-0.293378	0.0114205	-0.105916	-0.208619	0.0637213		-0.0487592	-0.0198096	-0.0666915	-0.12861
1837	-0.303164	0.294331	-0.120689	0.0860026	0.0206261	-0.133486	-0.0180325	-0.0239004	-0.293276	0.0106411	-0.104611	-0.208872	0.0637996		-0.0482083	-0.0196231	-0.066547	-0.130658
1838	-0.303138	0.293736	-0.120077	0.0859971	0.0204411	-0.133827	-0.0183517	-0.0237954	-0.293168	0.00988112	-0.103284	-0.209128	0.0638927		-0.0476588	-0.0194441	-0.0664026	-0.132671
1839	-0.303106	0.293143	-0.119458	0.0859863	0.0202538	-0.134158	-0.0186722	-0.0236805	-0.293055	0.00914067	-0.101935	-0.209389	0.0639996		-0.0471106	-0.0192727	-0.0662583	-0.134649
1840	-0.303066	0.292551	-0.118832	0.0859703	0.0200646	-0.134478	-0.0189936	-0.0235559	-0.292935	0.00841988	-0.100566	-0.209655	0.0641192		-0.0465638	-0.0191091	-0.066114	-0.136589
1841	-0.303018	0.291961	-0.118198	0.0859493	0.0198737	-0.134788	-0.0193158	-0.0234221	-0.29281	0.00771882	-0.099176	-0.209925	0.0642505		-0.0460185	-0.0189532	-0.0659697	-0.138492
1842	-0.302963	0.291372	-0.117558	0.0859233	0.0196816	-0.135086	-0.0196383	-0.0232792	-0.292679	0.00703755	-0.0977676	-0.2102	0.0643924		-0.0454748	-0.0188053	-0.0658254	-0.140357
1843	-0.302899	0.290785	-0.11691	0.0858926	0.0194885	-0.135374	-0.019961	-0.0231276	-0.292543	0.0063761	-0.0963414	-0.210479	0.0645438		-0.0449327	-0.0186653	-0.0656811	-0.142182
1844	-0.302827	0.2902	-0.116256	0.0858572	0.0192949	-0.13565	-0.0202834	-0.0229677	-0.292402	0.00573449	-0.0948984	-0.210764	0.0647036		-0.0443922	-0.0185334	-0.0655366	-0.143966
1845	-0.302746	0.289616	-0.115596	0.0858175	0.019101	-0.135915	-0.0206053	-0.0227998	-0.292255	0.0051127	-0.0934396	-0.211053	0.0648707		-0.0438537	-0.0184095	-0.065392	-0.14571
1846	-0.302655	0.289033	-0.114929	0.0857735	0.0189074	-0.136169	-0.0209264	-0.0226243	-0.292102	0.0045107	-0.0919661	-0.211347	0.065044		-0.043317	-0.0182938	-0.0652473	-0.147412
1847	-0.302556	0.288452	-0.114255	0.0857254	0.0187143	-0.136411	-0.0212463	-0.0224416	-0.291945	0.00392844	-0.0904787	-0.211645	0.0652224		-0.0427824	-0.0181862	-0.0651022	-0.149072
1848	-0.302446	0.287873	-0.113576	0.0856735	0.0185222	-0.136641	-0.0215647	-0.022252	-0.291782	0.00336585	-0.0889784	-0.211949	0.0654047		-0.04225	-0.0180868	-0.0649568	-0.150688
1849	-0.302326	0.287295	-0.11289	0.085618	0.0183314	-0.136859	-0.0218814	-0.0220561	-0.291614	0.00282283	-0.0874661	-0.212259	0.0655898		-0.0417199	-0.0179956	-0.064811	-0.152261
1850	-0.302197	0.286719	-0.112199	0.085559	0.0181424	-0.137065	-0.0221958	-0.0218541	-0.291441	0.00229929	-0.0859428	-0.212573	0.0657765		-0.0411922	-0.0179126	-0.0646647	-0.15379
1851	-0.302056	0.286144	-0.111501	0.0854969	0.0179555	-0.137258	-0.0225079	-0.0216466	-0.291264	0.00179511	-0.0844092	-0.212892	0.0659636		-0.0406671	-0.0178377	-0.0645178	-0.155273
1852	-0.301906	0.285571	-0.110798	0.0854318	0.0177712	-0.13744	-0.0228171	-0.0214339	-0.291081	0.00131013	-0.0828664	-0.213217	0.0661501		-0.0401446	-0.017771	-0.0643703	-0.156712
1853	-0.301744	0.284999	-0.110089	0.085364	0.0175898	-0.137608	-0.0231232	-0.0212165	-0.290894	0.000844213	-0.081315	-0.213548	0.0663347		-0.039625	-0.0177124	-0.064222	-0.158104
1854	-0.301571	0.284429	-0.109374	0.0852937	0.0174117	-0.137765	-0.0234259	-0.0209949	-0.290702	0.000397192	-0.0797558	-0.213883	0.0665164		-0.0391084	-0.0176619	-0.0640728	-0.15945
1855	-0.301388	0.28386	-0.108654	0.0852212	0.0172372	-0.137908	-0.0237249	-0.0207694	-0.290505	-3.11078e-05	-0.0781897	-0.214225	0.0666939		-0.0385948	-0.0176193	-0.0639225	-0.16075
1856	-0.301193	0.283293	-0.107929	0.0851468	0.0170669	-0.138039	-0.0240197	-0.0205405	-0.290304	-0.000440873	-0.0766175	-0.214572	0.0668661		-0.0380844	-0.0175846	-0.0637712	-0.162002
1857	-0.300986	0.282728	-0.107198	0.0850706	0.016901	-0.138157	-0.0243101	-0.0203087	-0.290098	-0.000832298	-0.0750397	-0.214924	0.067032		-0.0375773	-0.0175577	-0.0636187	-0.163208
1858	-0.300768	0.282163	-0.106461	0.0849931	0.0167398	-0.138263	-0.0245958	-0.0200745	-0.289888	-0.00120558	-0.0734571	-0.215282	0.0671904		-0.0370737	-0.0175386	-0.0634647	-0.164366
1859	-0.300539	0.281601	-0.10572	0.0849144	0.0165838	-0.138355	-0.0248765	-0.0198382	-0.289674	-0.00156094	-0.0718703	-0.215646	0.0673402		-0.0365736	-0.0175271	-0.0633093	-0.165476
1860	-0.300298	0.281039	-0.104974	0.0848348	0.0164333	-0.138434	-0.0251517	-0.0196003	-0.289455	-0.00189859	-0.0702801	-0.216016	0.0674805		-0.0360773	-0.017523	-0.0631523	-0.166538
1861	-0.300045	0.280479	-0.104222	0.0847547	0.0162887	-0.138501	-0.0254212	-0.0193613	-0.289232	-0.00221874	-0.0686869	-0.216392	0.06761		-0.0355847	-0.0175263	-0.0629935	-0.167553
1862	-0.299781	0.279921	-0.103466	0.0846743	0.0161501	-0.138555	-0.0256848	-0.0191217	-0.289005	-0.00252164	-0.0670913	-0.216774	0.0677279		-0.035096	-0.0175367	-0.0628329	-0.16852
1863	-0.299505	0.279364	-0.102705	0.084594	0.0160181	-0.138595	-0.025942	-0.0188818	-0.288774	-0.0028075	-0.0654939	-0.217161	0.067833		-0.0346113	-0.0175541	-0.0626702	-0.16944
1864	-0.299218	0.278808	-0.101939	0.0845141	0.0158927	-0.138623	-0.0261925	-0.0186422	-0.288539	-0.00307657	-0.0638951	-0.217555	0.0679243		-0.0341307	-0.0175783	-0.0625054	-0.170312
1865	-0.298919	0.278254	-0.101169	0.0844348	0.0157745	-0.138638	-0.0264362	-0.0184032	-0.2883	-0.00332909	-0.0622955	-0.217954	0.068001		-0.0336543	-0.0176091	-0.0623382	-0.171138
1866	-0.298608	0.277701	-0.100394	0.0843565	0.0156635	-0.13864	-0.0266726	-0.0181653	-0.288058	-0.00356527	-0.0606953	-0.21836	0.0680619		-0.0331822	-0.0176463	-0.0621687	-0.171916
1867	-0.298286	0.277149	-0.0996141	0.0842795	0.0155601	-0.138629	-0.0269015	-0.0179289	-0.287812	-0.00378537	-0.0590949	-0.218772	0.0681063		-0.0327144	-0.0176896	-0.0619965	-0.172649
1868	-0.297953	0.276599	-0.0988303	0.0842042	0.0154645	-0.138606	-0.0271227	-0.0176945	-0.287562	-0.0039896	-0.0574948	-0.21919	0.0681334		-0.032251	-0.0177389	-0.0618216	-0.173335
1869	-0.297608	0.27605	-0.0980422	0.084131	0.0153769	-0.13857	-0.0273358	-0.0174625	-0.287309	-0.00417819	-0.0558952	-0.219614	0.0681422		-0.0317922	-0.0177937	-0.0616438	-0.173976
1870	-0.297253	0.275502	-0.0972499	0.0840601	0.0152975	-0.138522	-0.0275405	-0.0172333	-0.287053	-0.00435137	-0.0542963	-0.220045	0.068132		-0.0313378	-0.017854	-0.061463	-0.174571
1871	-0.296886	0.274956	-0.0964534	0.0839919	0.0152264	-0.138462	-0.0277367	-0.0170073	-0.286793	-0.00450936	-0.0526984	-0.220481	0.0681021		-0.0308881	-0.0179194	-0.061279	-0.175123
1872	-0.296509	0.274411	-0.0956529	0.0839268	0.015164	-0.138389	-0.0279241	-0.0167849	-0.286531	-0.00465236	-0.0511018	-0.220924	0.0680517		-0.0304431	-0.0179896	-0.0610917	-0.175631
1873	-0.296121	0.273867	-0.0948484	0.0838653	0.0151102	-0.138305	-0.0281025	-0.0165665	-0.286265	-0.00478059	-0.0495066	-0.221373	0.0679803		-0.0300028	-0.0180642	-0.0609009	-0.176096
1874	-0.295723	0.273325	-0.09404	0.0838076	0.0150652	-0.138208	-0.0282715	-0.0163525	-0.285997	-0.00489425	-0.047913	-0.221829	0.0678872		-0.0295672	-0.0181431	-0.0607065	-0.176519
1875	-0.295315	0.272784	-0.0932278	0.0837541	0.0150291	-0.1381	-0.028431	-0.0161432	-0.285726	-0.00499353	-0.0463211	-0.22229	0.0677719		-0.0291365	-0.0182258	-0.0605083	-0.176901
1876	-0.294897	0.272244	-0.0924118	0.0837052	0.015002	-0.137981	-0.0285808	-0.0159391	-0.285452	-0.00507862	-0.0447311	-0.222758	0.0676338		-0.0287105	-0.0183121	-0.0603061	-0.177243
1877	-0.294469	0.271706	-0.0915921	0.0836614	0.0149839	-0.13785	-0.0287207	-0.0157404	-0.285176	-0.0051497	-0.0431431	-0.223231	0.0674724		-0.0282895	-0.0184015	-0.0600999	-0.177546
1878	-0.294032	0.271169	-0.0907688	0.083623	0.014975	-0.137709	-0.0288505	-0.0155476	-0.284897	-0.00520697	-0.0415572	-0.223711	0.0672874		-0.0278733	-0.0184937	-0.0598895	-0.17781
1879	-0.293586	0.270634	-0.089942	0.0835905	0.0149752	-0.137556	-0.02897	-0.0153609	-0.284616	-0.00525058	-0.0399736	-0.224197	0.0670783		-0.027462	-0.0185884	-0.0596747	-0.178038
1880	-0.293131	0.270099	-0.0891115	0.0835642	0.0149845	-0.137394	-0.0290791	-0.0151807	-0.284333	-0.0052807	-0.0383921	-0.224688	0.0668448		-0.0270556	-0.0186852	-0.0594554	-0.17823
1881	-0.292668	0.269566	-0.0882776	0.0835445	0.0150029	-0.13722	-0.0291775	-0.0150072	-0.284048	-0.00529751	-0.036813	-0.225185	0.0665865		-0.0266541	-0.0187837	-0.0592315	-0.178388
1882	-0.292196	0.269035	-0.0874402	0.0835318	0.0150304	-0.137037	-0.0292651	-0.0148408	-0.283762	-0.00530117	-0.0352363	-0.225688	0.0663033		-0.0262575	-0.0188835	-0.0590029	-0.178512
1883	-0.291717	0.268504	-0.0865994	0.0835265	0.015067	-0.136844	-0.0293419	-0.0146818	-0.283473	-0.00529184	-0.033662	-0.226196	0.0659948		-0.0258659	-0.0189844	-0.0587694	-0.178605
1884	-0.291231	0.267975	-0.0857551	0.0835291	0.0151125	-0.136642	-0.0294076	-0.0145303	-0.283182	-0.00526966	-0.03209	-0.226709	0.065661		-0.0254792	-0.0190858	-0.058531	-0.178666
1885	-0.290737	0.267447	-0.0849073	0.0835399	0.0151668	-0.13643	-0.0294621	-0.0143867	-0.282891	-0.00523479	-0.0305204	-0.227228	0.0653016		-0.0250975	-0.0191875	-0.0582874	-0.178699
1886	-0.290237	0.26692	-0.0840562	0.0835592	0.0152298	-0.136209	-0.0295054	-0.0142512	-0.282597	-0.00518737	-0.0289533	-0.227751	0.0649167		-0.0247208	-0.0192892	-0.0580386	-0.178704
1887	-0.28973	0.266395	-0.0832017	0.0835875	0.0153015	-0.13598	-0.0295372	-0.014124	-0.282302	-0.00512752	-0.0273884	-0.22828	0.064506		-0.024349	-0.0193903	-0.0577844	-0.178682
1888	-0.289218	0.265871	-0.0823437	0.083625	0.0153816	-0.135742	-0.0295576	-0.0140053	-0.282006	-0.00505537	-0.0258259	-0.228812	0.0640698		-0.0239823	-0.0194907	-0.0575249	-0.178636
1889	-0.2887	0.265348	-0.0814824	0.0836723	0.01547	-0.135497	-0.0295664	-0.0138953	-0.281709	-0.00497105	-0.0242656	-0.22935	0.0636079		-0.0236207	-0.0195899	-0.0572597	-0.178567
1890	-0.288177	0.264825	-0.0806177	0.0837296	0.0155664	-0.135243	-0.0295636	-0.0137942	-0.281411	-0.00487466	-0.0227075	-0.229891	0.0631204		-0.0232641	-0.0196877	-0.0569889	-0.178477
1891	-0.287649	0.264304	-0.0797496	0.0837974	0.0156708	-0.134983	-0.029549	-0.0137022	-0.281111	-0.00476631	-0.0211515	-0.230436	0.0626077		-0.0229127	-0.0197837	-0.0567123	-0.178367
1892	-0.287117	0.263784	-0.0788781	0.0838758	0.0157827	-0.134715	-0.0295226	-0.0136193	-0.280811	-0.0046461	-0.0195976	-0.230985	0.0620698		-0.0225664	-0.0198776	-0.0564299	-0.178238
1893	-0.286581	0.263265	-0.0780033	0.0839654	0.0159021	-0.13444	-0.0294844	-0.0135458	-0.28051	-0.00451414	-0.0180456	-0.231537	0.061507		-0.0222254	-0.019969	-0.0561415	-0.178094
1894	-0.286042	0.262747	-0.0771251	0.0840664	0.0160286	-0.134159	-0.0294342	-0.0134818	-0.280208	-0.00437051	-0.0164955	-0.232092	0.0609195		-0.0218897	-0.0200578	-0.0558471	-0.177935
1895	-0.2855	0.26223	-0.0762436	0.0841792	0.0161619	-0.133872	-0.029372	-0.0134273	-0.279905	-0.00421531	-0.0149472	-0.232651	0.0603078		-0.0215593	-0.0201435	-0.0555465	-0.177763
1896	-0.284955	0.261713	-0.0753588	0.0843041	0.0163019	-0.13358	-0.0292979	-0.0133825	-0.279602	-0.00404862	-0.0134005	-0.233211	0.0596721		-0.0212343	-0.020226	-0.0552398	-0.17758
1897	-0.284407	0.261197	-0.0744707	0.0844413	0.0164481	-0.133282	-0.0292117	-0.0133474	-0.279298	-0.00387051	-0.0118553	-0.233774	0.0590128		-0.0209148	-0.0203049	-0.0549267	-0.177389
1898	-0.283858	0.260682	-0.0735793	0.0845913	0.0166004	-0.13298	-0.0291135	-0.0133221	-0.278994	-0.00368107	-0.0103115	-0.234339	0.0583303		-0.0206008	-0.0203799	-0.0546073	-0.177191
1899	-0.283307	0.260167	-0.0726847	0.0847541	0.0167582	-0.132672	-0.0290032	-0.0133067	-0.278689	-0.00348037	-0.00876895	-0.234906	0.0576248		-0.0202923	-0.0204509	-0.0542815	-0.176987
1900	-0.282756	0.259653	-0.0717868	0.0849302	0.0169214	-0.132361	-0.0288809	-0.0133011	-0.278383	-0.00326848	-0.00722742	-0.235474	0.0568968		-0.0199895	-0.0205175	-0.0539491	-0.176781
1901	-0.282203	0.25914	-0.0708858	0.0851198	0.0170895	-0.132046	-0.0287465	-0.0133054	-0.278077	-0.00304546	-0.00568678	-0.236043	0.0561466		-0.0196924	-0.0205795	-0.0536103	-0.176573
1902	-0.281651	0.258626	-0.0699815	0.085323	0.0172622	-0.131728	-0.0286002	-0.0133195	-0.277771	-0.00281138	-0.00414685	-0.236613	0.0553745		-0.0194011	-0.0206366	-0.0532648	-0.176367
1903	-0.281098	0.258114	-0.0690741	0.0855402	0.0174391	-0.131406	-0.0284419	-0.0133436	-0.277464	-0.00256627	-0.00260746	-0.237183	0.0545807		-0.0191158	-0.0206887	-0.0529127	-0.176164
1904	-0.280547	0.257601	-0.0681636	0.0857714	0.0176198	-0.131082	-0.0282717	-0.0133774	-0.277157	-0.00231021	-0.00106841	-0.237754	0.0537657		-0.0188363	-0.0207355	-0.052554	-0.175966
1905	-0.279996	0.257088	-0.0672499	0.0860169	0.0178038	-0.130756	-0.0280896	-0.013421	-0.276849	-0.00204322	0.000470437	-0.238325	0.0529298		-0.018563	-0.0207767	-0.0521885	-0.175774
1906	-0.279446	0.256576	-0.0663332	0.0862767	0.0179908	-0.130428	-0.0278958	-0.0134744	-0.276541	-0.00176536	0.00200926	-0.238895	0.0520732		-0.0182958	-0.0208123	-0.0518162	-0.175592
1907	-0.278898	0.256064	-0.0654133	0.0865512	0.0181804	-0.130099	-0.0276902	-0.0135374	-0.276233	-0.00147665	0.00354819	-0.239465	0.0511964		-0.0180349	-0.0208419	-0.0514372	-0.17542
1908	-0.278352	0.255551	-0.0644903	0.0868402	0.0183721	-0.129768	-0.0274731	-0.01361	-0.275924	-0.00117713	0.00508735	-0.240033	0.0502997		-0.0177803	-0.0208655	-0.0510515	-0.175261
1909	-0.277809	0.255038	-0.0635643	0.0871441	0.0185655	-0.129437	-0.0272444	-0.013692	-0.275615	-0.000866826	0.00662685	-0.240601	0.0493835		-0.0175322	-0.0208828	-0.0506589	-0.175116
1910	-0.277268	0.254525	-0.0626353	0.0874627	0.0187601	-0.129106	-0.0270042	-0.0137834	-0.275305	-0.000545762	0.00816678	-0.241167	0.0484482		-0.0172906	-0.0208937	-0.0502596	-0.174988
1911	-0.27673	0.254012	-0.0617032	0.0877962	0.0189555	-0.128776	-0.0267528	-0.0138841	-0.274995	-0.000213957	0.00970717	-0.241731	0.0474942		-0.0170557	-0.020898	-0.0498535	-0.174878
1912	-0.276196	0.253498	-0.0607682	0.0881446	0.0191513	-0.128445	-0.0264902	-0.0139939	-0.274685	0.000128573	0.011248	-0.242293	0.046522		-0.0168275	-0.0208956	-0.0494406	-0.174787
1913	-0.275665	0.252984	-0.0598303	0.0885079	0.0193471	-0.128116	-0.0262166	-0.0141127	-0.274374	0.000481813	0.0127894	-0.242853	0.045532		-0.0166063	-0.0208864	-0.0490211	-0.174718
1914	-0.275138	0.252469	-0.0588894	0.088886	0.0195424	-0.127788	-0.025932	-0.0142403	-0.274063	0.00084575	0.0143312	-0.243409	0.0445247		-0.0163919	-0.0208702	-0.0485948	-0.174671
1915	-0.274616	0.251954	-0.0579457	0.089279	0.0197368	-0.127462	-0.0256367	-0.0143767	-0.273752	0.00122037	0.0158733	-0.243963	0.0435004		-0.0161847	-0.0208469	-0.048162	-0.174649
1916	-0.274098	0.251437	-0.0569991	0.0896866	0.0199299	-0.127138	-0.0253308	-0.0145216	-0.27344	0.00160567	0.0174156	-0.244514	0.0424598		-0.0159846	-0.0208165	-0.0477225	-0.174653
1917	-0.273586	0.25092	-0.0560498	0.0901089	0.0201213	-0.126816	-0.0250144	-0.0146748	-0.273128	0.00200163	0.0189581	-0.24506	0.0414032		-0.0157918	-0.0207788	-0.0472765	-0.174683
1918	-0.273078	0.250402	-0.0550977	0.0905458	0.0203107	-0.126498	-0.0246877	-0.0148362	-0.272815	0.00240825	0.0205005	-0.245603	0.0403311		-0.0156064	-0.0207337	-0.0468239	-0.174742
1919	-0.272576	0.249883	-0.0541429	0.090997	0.0204976	-0.126182	-0.0243509	-0.0150057	-0.272503	0.00282552	0.0220425	-0.246142	0.0392441		-0.0154284	-0.0206811	-0.0463649	-0.174829
1920	-0.27208	0.249363	-0.0531855	0.0914624	0.0206817	-0.12587	-0.0240042	-0.0151829	-0.272189	0.00325344	0.0235841	-0.246676	0.0381427		-0.015258	-0.0206211	-0.0458996	-0.174948
1921	-0.27159	0.248841	-0.0522254	0.0919419	0.0208627	-0.125562	-0.0236478	-0.0153678	-0.271876	0.00369201	0.025125	-0.247205	0.0370273		-0.0150952	-0.0205535	-0.0454279	-0.175097
1922	-0.271106	0.248319	-0.0512628	0.0924352	0.0210402	-0.125259	-0.0232819	-0.01556	-0.271562	0.00414124	0.0266647	-0.247729	0.0358984		-0.0149401	-0.0204783	-0.0449501	-0.175279
1923	-0.270629	0.247794	-0.0502976	0.0929421	0.021214	-0.12496	-0.0229067	-0.0157594	-0.271248	0.00460112	0.0282031	-0.248247	0.0347565		-0.0147929	-0.0203953	-0.044466	-0.175494
1924	-0.270158	0.247269	-0.04933	0.0934624	0.0213837	-0.124665	-0.0225224	-0.0159659	-0.270933	0.00507169	0.0297398	-0.248759	0.0336021		-0.0146535	-0.0203047	-0.0439759	-0.175742
1925	-0.269695	0.246741	-0.04836	0.0939958	0.0215491	-0.124376	-0.0221292	-0.016179	-0.270619	0.00555294	0.0312744	-0.249265	0.0324356		-0.014522	-0.0202064	-0.0434799	-0.176025
1926	-0.269239	0.246212	-0.0473877	0.0945421	0.0217098	-0.124093	-0.0217274	-0.0163987	-0.270304	0.0060449	0.0328065	-0.249765	0.0312576		-0.0143986	-0.0201003	-0.042978	-0.176343
1927	-0.26879	0.245681	-0.0464132	0.0951009	0.0218657	-0.123815	-0.0213171	-0.0166247	-0.269989	0.00654761	0.0343357	-0.250257	0.0300685		-0.0142831	-0.0199865	-0.0424704	-0.176695
1928	-0.26835	0.245148	-0.0454365	0.095672	0.0220164	-0.123544	-0.0208986	-0.0168568	-0.269674	0.00706108	0.0358615	-0.250743	0.0288688		-0.0141758	-0.0198649	-0.0419571	-0.177083
1929	-0.267917	0.244613	-0.0444578	0.096255	0.0221617	-0.123279	-0.0204722	-0.0170947	-0.269359	0.00758536	0.0373836	-0.251221	0.0276589		-0.0140765	-0.0197356	-0.0414383	-0.177507
1930	-0.267493	0.244076	-0.0434771	0.0968496	0.0223015	-0.12302	-0.020038	-0.0173382	-0.269044	0.00812047	0.0389014	-0.251692	0.0264392		-0.0139854	-0.0195986	-0.0409142	-0.177966
1931	-0.267077	0.243536	-0.0424945	0.0974554	0.0224354	-0.122769	-0.0195963	-0.0175871	-0.268728	0.00866647	0.0404145	-0.252154	0.0252103		-0.0139024	-0.019454	-0.0403848	-0.17846
1932	-0.266669	0.242994	-0.0415101	0.0980721	0.0225633	-0.122524	-0.0191474	-0.0178412	-0.268413	0.0092234	0.0419225	-0.252609	0.0239727		-0.0138275	-0.0193018	-0.0398502	-0.17899
1933	-0.266271	0.24245	-0.0405241	0.0986993	0.0226851	-0.122287	-0.0186914	-0.0181002	-0.268099	0.0097913	0.0434248	-0.253055	0.0227268		-0.0137608	-0.019142	-0.0393106	-0.179554
1934	-0.265881	0.241903	-0.0395366	0.0993366	0.0228005	-0.122058	-0.0182287	-0.0183638	-0.267784	0.0103702	0.0449211	-0.253492	0.0214731		-0.0137022	-0.0189748	-0.0387663	-0.180154
1935	-0.2655	0.241353	-0.0385477	0.0999837	0.0229094	-0.121837	-0.0177594	-0.0186319	-0.26747	0.0109602	0.0464109	-0.25392	0.0202122		-0.0136517	-0.0188001	-0.0382172	-0.180787
1936	-0.265129	0.240801	-0.0375575	0.10064	0.0230117	-0.121623	-0.0172839	-0.0189041	-0.267156	0.0115614	0.0478936	-0.25434	0.0189445		-0.0136094	-0.0186183	-0.0376635	-0.181454
1937	-0.264767	0.240245	-0.0365663	0.101305	0.0231074	-0.121418	-0.0168022	-0.0191804	-0.266843	0.0121737	0.0493689	-0.254749	0.0176707		-0.013575	-0.0184292	-0.0371055	-0.182154
1938	-0.264415	0.239687	-0.0355741	0.101979	0.0231963	-0.121221	-0.0163148	-0.0194603	-0.26653	0.0127973	0.0508363	-0.255149	0.0163913		-0.0135486	-0.0182331	-0.0365433	-0.182887
1939	-0.264073	0.239127	-0.0345811	0.102661	0.0232784	-0.121033	-0.0158217	-0.0197437	-0.266218	0.0134323	0.0522954	-0.25554	0.015107		-0.0135302	-0.01803	-0.035977	-0.183651
1940	-0.26374	0.238563	-0.0335875	0.103351	0.0233537	-0.120854	-0.0153234	-0.0200303	-0.265907	0.0140787	0.0537458	-0.25592	0.0138183		-0.0135196	-0.0178201	-0.0354068	-0.184446
1941	-0.263417	0.237996	-0.0325934	0.104048	0.0234221	-0.120683	-0.0148199	-0.02032	-0.265596	0.0147365	0.055187	-0.25629	0.012526		-0.0135167	-0.0176036	-0.0348329	-0.185271
1942	-0.263105	0.237426	-0.0315991	0.104751	0.0234837	-0.120521	-0.0143116	-0.0206124	-0.265287	0.015406	0.0566188	-0.25665	0.0112308		-0.0135214	-0.0173805	-0.0342554	-0.186124
1943	-0.262803	0.236854	-0.0306046	0.105462	0.0235385	-0.120369	-0.0137987	-0.0209074	-0.264979	0.016087	0.0580407	-0.256999	0.00993362		-0.0135336	-0.0171511	-0.0336746	-0.187006
1944	-0.26251	0.236278	-0.0296103	0.106178	0.0235865	-0.120225	-0.0132813	-0.0212046	-0.264672	0.0167798	0.0594524	-0.257337	0.00863518		-0.0135532	-0.0169155	-0.0330906	-0.187914
1945	-0.262229	0.235699	-0.0286162	0.1069	0.0236277	-0.120091	-0.0127599	-0.021504	-0.264367	0.0174844	0.0608536	-0.257665	0.00733641		-0.01358	-0.0166738	-0.0325035	-0.188847
1946	-0.261957	0.235117	-0.0276226	0.107627	0.0236623	-0.119967	-0.0122345	-0.0218051	-0.264063	0.0182009	0.062244	-0.257982	0.00603825		-0.0136139	-0.0164263	-0.0319137	-0.189805
1947	-0.261696	0.234532	-0.0266298	0.108358	0.0236904	-0.119851	-0.0117054	-0.0221079	-0.26376	0.0189294	0.0636232	-0.258288	0.00474164		-0.0136545	-0.016173	-0.0313212	-0.190785
1948	-0.261446	0.233944	-0.0256378	0.109094	0.023712	-0.119745	-0.011173	-0.0224121	-0.263459	0.01967	0.064991	-0.258583	0.00344759		-0.0137018	-0.0159143	-0.0307262	-0.191788
1949	-0.261206	0.233353	-0.024647	0.109834	0.0237273	-0.119649	-0.0106373	-0.0227174	-0.26316	0.0204227	0.0663471	-0.258867	0.00215712		-0.0137555	-0.0156504	-0.030129	-0.19281
1950	-0.260976	0.232758	-0.0236576	0.110577	0.0237364	-0.119562	-0.0100987	-0.0230237	-0.262863	0.0211877	0.0676912	-0.259139	0.000871293		-0.0138154	-0.0153813	-0.0295296	-0.193851
1951	-0.260757	0.232161	-0.0226698	0.111323	0.0237395	-0.119484	-0.00955746	-0.0233306	-0.262568	0.021965	0.069023	-0.259401	-0.000408798		-0.0138812	-0.0151075	-0.0289283	-0.194909
1952	-0.260548	0.231561	-0.0216839	0.112072	0.0237367	-0.119416	-0.00901371	-0.023638	-0.262275	0.0227547	0.0703424	-0.259651	-0.00168202		-0.0139526	-0.014829	-0.0283252	-0.195983
1953	-0.26035	0.230958	-0.0207	0.112822	0.0237283	-0.119357	-0.00846774	-0.0239457	-0.261984	0.0235569	0.071649	-0.25989	-0.00294723		-0.0140293	-0.0145462	-0.0277205	-0.197071
1954	-0.260161	0.230352	-0.0197186	0.113574	0.0237144	-0.119307	-0.00791977	-0.0242534	-0.261695	0.0243717	0.0729425	-0.260118	-0.00420324		-0.014111	-0.0142594	-0.0271143	-0.198171
1955	-0.259983	0.229744	-0.0187398	0.114328	0.0236951	-0.119267	-0.00737004	-0.0245609	-0.261409	0.025199	0.0742228	-0.260334	-0.00544886		-0.0141974	-0.0139687	-0.0265069	-0.199282
1956	-0.259815	0.229133	-0.0177639	0.115082	0.0236709	-0.119236	-0.00681879	-0.024868	-0.261125	0.026039	0.0754897	-0.26054	-0.00668286		-0.0142881	-0.0136744	-0.0258984	-0.200402
1957	-0.259656	0.228519	-0.0167911	0.115837	0.0236417	-0.119215	-0.00626624	-0.0251745	-0.260844	0.0268917	0.0767428	-0.260734	-0.00790401		-0.0143828	-0.0133769	-0.025289	-0.20153
1958	-0.259508	0.227902	-0.0158219	0.116592	0.023608	-0.119202	-0.00571262	-0.0254801	-0.260565	0.0277571	0.0779821	-0.260917	-0.00911106		-0.0144811	-0.0130765	-0.0246787	-0.202664
1959	-0.259368	0.227284	-0.0148563	0.117346	0.0235699	-0.119199	-0.00515816	-0.0257848	-0.260289	0.0286352	0.0792072	-0.261088	-0.0103027		-0.0145825	-0.0127734	-0.0240678	-0.203802
1960	-0.259237	0.226662	-0.0138949	0.1181	0.0235277	-0.119204	-0.00460308	-0.0260881	-0.260017	0.0295261	0.080418	-0.261249	-0.0114777		-0.0146867	-0.0124679	-0.0234565	-0.204943
1961	-0.259116	0.226039	-0.0129377	0.118852	0.0234818	-0.119219	-0.00404759	-0.02639	-0.259747	0.0304297	0.0816144	-0.261399	-0.0126348		-0.0147933	-0.0121603	-0.0228448	-0.206085
1962	-0.259003	0.225414	-0.0119852	0.119603	0.0234323	-0.119242	-0.0034919	-0.0266903	-0.25948	0.0313461	0.0827962	-0.261538	-0.0137727		-0.0149018	-0.011851	-0.022233	-0.207227
1963	-0.258898	0.224786	-0.0110376	0.120352	0.0233796	-0.119274	-0.00293623	-0.0269886	-0.259216	0.0322752	0.0839633	-0.261666	-0.0148901		-0.0150118	-0.0115403	-0.0216211	-0.208367
1964	-0.258802	0.224157	-0.0100953	0.121098	0.023324	-0.119314	-0.00238077	-0.0272849	-0.258956	0.033217	0.0851155	-0.261784	-0.0159858		-0.0151229	-0.0112284	-0.0210093	-0.209503
1965	-0.258713	0.223525	-0.00915849	0.121842	0.0232658	-0.119362	-0.00182571	-0.0275788	-0.258699	0.0341714	0.0862527	-0.261891	-0.0170586		-0.0152346	-0.0109158	-0.0203979	-0.210634
1966	-0.258631	0.222893	-0.00822753	0.122582	0.0232053	-0.119419	-0.00127123	-0.0278703	-0.258446	0.0351384	0.087375	-0.261987	-0.0181072		-0.0153464	-0.0106026	-0.0197868	-0.211759
1967	-0.258557	0.222258	-0.00730271	0.123319	0.0231428	-0.119484	-0.000717502	-0.0281591	-0.258196	0.036118	0.0884821	-0.262073	-0.0191305		-0.0154579	-0.0102893	-0.0191764	-0.212876
1968	-0.258489	0.221622	-0.00638433	0.124053	0.0230788	-0.119557	-0.000164694	-0.028445	-0.257949	0.03711	0.089574	-0.262149	-0.0201272		-0.0155686	-0.00997616	-0.0185666	-0.213983
1969	-0.258428	0.220985	-0.00547269	0.124782	0.0230134	-0.119637	0.000387038	-0.0287279	-0.257706	0.0381144	0.0906509	-0.262215	-0.0210962		-0.0156781	-0.00966349	-0.0179578	-0.21508
1970	-0.258372	0.220347	-0.00456808	0.125507	0.0229471	-0.119725	0.00093755	-0.0290075	-0.257467	0.039131	0.0917125	-0.262271	-0.0220364		-0.0157858	-0.00935163	-0.0173499	-0.216165
1971	-0.258322	0.219708	-0.00367082	0.126228	0.0228801	-0.119821	0.0014867	-0.0292838	-0.257232	0.0401599	0.0927591	-0.262317	-0.0229466		-0.0158913	-0.00904092	-0.0167431	-0.217236
1972	-0.258277	0.219068	-0.00278118	0.126943	0.0228129	-0.119923	0.00203437	-0.0295565	-0.257001	0.0412007	0.0937906	-0.262354	-0.0238257		-0.0159942	-0.0087317	-0.0161377	-0.218293
1973	-0.258238	0.218427	-0.00189946	0.127653	0.0227456	-0.120032	0.00258043	-0.0298254	-0.256774	0.0422535	0.0948072	-0.262381	-0.0246728		-0.016094	-0.0084243	-0.0155336	-0.219334
1974	-0.258202	0.217786	-0.00102595	0.128358	0.0226788	-0.120148	0.00312478	-0.0300904	-0.25655	0.043318	0.095809	-0.262398	-0.0254868		-0.0161903	-0.00811906	-0.014931	-0.220358
1975	-0.25817	0.217144	-0.000160941	0.129056	0.0226126	-0.12027	0.0036673	-0.0303514	-0.256331	0.0443942	0.0967962	-0.262407	-0.0262667		-0.0162825	-0.00781633	-0.0143301	-0.221364
1976	-0.258142	0.216502	0.0006953	0.129749	0.0225474	-0.120399	0.00420792	-0.0306082	-0.256116	0.0454817	0.0977689	-0.262406	-0.0270115		-0.0163704	-0.00751645	-0.013731	-0.222351
1977	-0.258117	0.21586	0.0015425	0.130435	0.0224835	-0.120534	0.00474652	-0.0308607	-0.255905	0.0465804	0.0987274	-0.262397	-0.0277204		-0.0164534	-0.00721975	-0.0131338	-0.223318
1978	-0.258095	0.215218	0.00238039	0.131114	0.0224213	-0.120674	0.00528305	-0.0311087	-0.255698	0.04769	0.0996719	-0.262379	-0.0283926		-0.0165312	-0.00692658	-0.0125386	-0.224263
1979	-0.258074	0.214576	0.00320871	0.131787	0.022361	-0.12082	0.00581741	-0.0313521	-0.255496	0.0488105	0.100603	-0.262352	-0.0290275		-0.0166034	-0.00663727	-0.0119456	-0.225186
1980	-0.258056	0.213934	0.00402722	0.132453	0.022303	-0.120971	0.00634955	-0.0315908	-0.255298	0.0499415	0.10152	-0.262317	-0.0296244		-0.0166696	-0.00635216	-0.0113548	-0.226086
1981	-0.258038	0.213293	0.00483567	0.133111	0.0222475	-0.121126	0.00687941	-0.0318248	-0.255105	0.0510828	0.102425	-0.262274	-0.030183		-0.0167296	-0.00607158	-0.0107664	-0.226962
1982	-0.258022	0.212652	0.00563384	0.133762	0.0221949	-0.121287	0.00740693	-0.0320539	-0.254916	0.0522341	0.103316	-0.262223	-0.0307027		-0.0167828	-0.00579587	-0.0101804	-0.227812
1983	-0.258006	0.212013	0.0064215	0.134406	0.0221454	-0.121452	0.00793207	-0.032278	-0.254732	0.0533951	0.104195	-0.262164	-0.0311834		-0.0168291	-0.00552534	-0.00959697	-0.228637
1984	-0.257989	0.211374	0.00719842	0.135041	0.0220994	-0.121621	0.00845479	-0.0324972	-0.254552	0.0545656	0.105062	-0.262097	-0.0316249		-0.0168681	-0.0052603	-0.00901619	-0.229434
1985	-0.257972	0.210736	0.00796441	0.135669	0.0220571	-0.121794	0.00897507	-0.0327113	-0.254378	0.0557453	0.105918	-0.262023	-0.032027		-0.0168995	-0.00500108	-0.00843813	-0.230204
1986	-0.257954	0.210099	0.00871926	0.136288	0.0220187	-0.121971	0.00949289	-0.0329202	-0.254208	0.0569338	0.106761	-0.261941	-0.0323898		-0.0169231	-0.00474796	-0.00786288	-0.230944
1987	-0.257935	0.209463	0.00946277	0.136899	0.0219847	-0.122151	0.0100082	-0.0331241	-0.254043	0.0581308	0.107594	-0.261852	-0.0327133		-0.0169387	-0.00450127	-0.00729049	-0.231656
1988	-0.257913	0.208829	0.0101947	0.137501	0.0219552	-0.122334	0.0105211	-0.0333228	-0.253884	0.059336	0.108416	-0.261756	-0.0329978		-0.0169459	-0.00426128	-0.00672105	-0.232336
1989	-0.257889	0.208196	0.010915	0.138095	0.0219305	-0.12252	0.0110314	-0.0335164	-0.253729	0.0605489	0.109228	-0.261653	-0.0332434		-0.0169447	-0.0040283	-0.0061546	-0.232985
1990	-0.257861	0.207565	0.0116233	0.13868	0.0219109	-0.122709	0.0115393	-0.0337049	-0.25358	0.0617693	0.110029	-0.261543	-0.0334505		-0.0169348	-0.0038026	-0.00559122	-0.233602
1991	-0.25783	0.206935	0.0123196	0.139256	0.0218965	-0.122899	0.0120447	-0.0338883	-0.253436	0.0629967	0.110821	-0.261426	-0.0336195		-0.0169161	-0.00358447	-0.00503094	-0.234186
1992	-0.257795	0.206307	0.0130036	0.139824	0.0218877	-0.123092	0.0125476	-0.0340667	-0.253297	0.0642307	0.111604	-0.261303	-0.0337507		-0.0168884	-0.00337419	-0.00447382	-0.234735
1993	-0.257756	0.205681	0.0136751	0.140382	0.0218846	-0.123286	0.0130481	-0.03424	-0.253164	0.0654709	0.112377	-0.261173	-0.0338448		-0.0168516	-0.00317202	-0.00391989	-0.235248
1994	-0.257711	0.205056	0.014334	0.140931	0.0218875	-0.123482	0.0135461	-0.0344085	-0.253037	0.0667169	0.113142	-0.261037	-0.0339024		-0.0168056	-0.00297822	-0.00336918	-0.235726
1995	-0.257661	0.204434	0.0149801	0.141471	0.0218965	-0.123679	0.0140418	-0.0345722	-0.252915	0.0679682	0.113898	-0.260895	-0.033924		-0.0167503	-0.00279304	-0.00282174	-0.236165
1996	-0.257605	0.203814	0.0156133	0.142002	0.0219119	-0.123877	0.0145352	-0.0347312	-0.252798	0.0692243	0.114646	-0.260746	-0.0339105		-0.0166857	-0.00261672	-0.00227757	-0.236566
1997	-0.257543	0.203196	0.0162333	0.142524	0.0219339	-0.124076	0.0150263	-0.0348856	-0.252688	0.0704847	0.115386	-0.260591	-0.0338627		-0.0166116	-0.00244948	-0.00173669	-0.236927
[truncated: 13,004 more rows]
