# Supplementary material for: Neural circuit mechanisms for transforming learned olfactory valences into wind-oriented movement
Source: eLife. 2023 Sep 18;12:e85756. doi: 10.7554/eLife.85756 (PMC10588983; doi:10.7554/eLife.85756)
Supplement: Figure 4—source data 3. [file elife-85756-fig4-data3.xlsx]

## Sheet: Sheet1
	Green		Orange		Black
Sec	Mean	SEM	Mean	SEM	Mean	SEM
0	-0.0142018	0.0164351	0.00103118	0.00322848	0.00241576	0.0043502
1	-0.00851184	0.00320914	0.00105173	0.00145394	0.00171746	0.00145289
2	0.00345025	0.0147225	0.0161086	0.00536672	0.0035755	0.00332197
3	0.00209265	0.0235594	0.0778863	0.0165773	0.0121349	0.00666182
4	0.00698227	0.0249568	0.221836	0.0465789	0.0239821	0.00761691
5	0.0199155	0.0164506	0.38543	0.0848934	0.0350808	0.00699834
6	0.0235741	0.0144689	0.435489	0.10094	0.0376294	0.00773071
7	0.0256211	0.0181555	0.37945	0.0898522	0.0326333	0.0081472
8	0.0281554	0.0224748	0.302653	0.0696173	0.0309282	0.00727218
9	0.0336451	0.0232039	0.234959	0.0529236	0.0272336	0.00591336
10	0.037566	0.0186648	0.177508	0.0405291	0.0210232	0.00628494
11	0.0307947	0.0151879	0.135182	0.0309545	0.0199837	0.00781234
12	0.0271496	0.0168327	0.104935	0.0242092	0.0211521	0.00748595
13	0.0294189	0.0193692	0.081166	0.0204835	0.0217793	0.00847258
14	0.0184871	0.0194817	0.0650299	0.018289	0.0255663	0.00888924
15	0.0124533	0.0195779	0.0588208	0.0152811	0.0271237	0.00814623
16	0.0186891	0.0204597	0.0545782	0.0129637	0.0252096	0.00802683
17	0.013315	0.0195764	0.046773	0.0118046	0.0269152	0.00843846
18	0.00492452	0.014825	0.0380693	0.00994434	0.0297354	0.00818005
19	0.00684894	0.0155078	0.031644	0.00990079	0.0279764	0.00848114
20	0.0272242	0.0162559	0.0291003	0.010027	0.0231751	0.00833373
