# Supplementary material for: Neural circuit mechanisms for transforming learned olfactory valences into wind-oriented movement
Source: eLife. 2023 Sep 18;12:e85756. doi: 10.7554/eLife.85756 (PMC10588983; doi:10.7554/eLife.85756)
Supplement: Figure 5—figure supplement 2—source data 1. [file elife-85756-fig5-figsupp2-data1.xlsx]

## Sheet: Sheet1
	OCT			MCH
Time (x10^-4) (sec)	Pre	Post		Pre	Post
1	-60.9783	-58.375		-61.5404	-61.7244
2	-61.0966	-58.3356		-61.5634	-61.6784
3	-61.0933	-58.3421		-61.6061	-61.7211
4	-61.0638	-58.3158		-61.6817	-61.7836
5	-61.0802	-58.4079		-61.6883	-61.7803
6	-61.0473	-58.329		-61.6258	-61.8066
7	-61.1262	-58.4112		-61.5995	-61.8592
8	-61.2051	-58.4046		-61.6718	-61.8263
9	-61.1229	-58.3389		-61.6554	-61.8329
10	-61.1361	-58.3421		-61.7014	-61.8658
11	-61.0112	-58.3224		-61.5962	-61.9578
12	-61.1131	-58.4342		-61.6883	-62.0137
13	-61.0736	-58.3652		-61.708	-61.9348
14	-61.0835	-58.4177		-61.7047	-62.0301
15	-61.1328	-58.4999		-61.6817	-62.0104
16	-61.1196	-58.5328		-61.6357	-62.0268
17	-61.0112	-58.5098		-61.5732	-61.9808
18	-61.0276	-58.5755		-61.5765	-62.0268
19	-61.0539	-58.5164		-61.6193	-61.9775
20	-60.9717	-58.4934		-61.5798	-62.04
21	-60.883	-58.4473		-61.5404	-61.9545
22	-60.8797	-58.4736		-61.5009	-61.9414
23	-60.8731	-58.4605		-61.4976	-61.9315
24	-60.837	-58.4835		-61.5206	-61.9841
25	-60.883	-58.398		-61.3892	-62.0005
26	-60.8107	-58.4342		-61.376	-61.9315
27	-60.7877	-58.5065		-61.4352	-61.9282
28	-60.8074	-58.5492		-61.4385	-61.9447
29	-60.9356	-58.5624		-61.4155	-61.8658
30	-60.8402	-58.5032		-61.445	-61.994
31	-60.7712	-58.5164		-61.4122	-61.971
32	-60.7712	-58.6215		-61.3629	-61.9479
33	-60.7877	-58.6544		-61.3201	-61.9118
34	-60.7515	-58.7267		-61.376	-61.9282
35	-60.6627	-58.6741		-61.2774	-61.9052
36	-60.7351	-58.6314		-61.2807	-61.8658
37	-60.7318	-58.6643		-61.3234	-61.9677
38	-60.8665	-58.615		-61.3431	-61.823
39	-60.9191	-58.7037		-61.3136	-61.8921
40	-60.8665	-58.7234		-61.3563	-61.846
41	-60.9126	-58.73		-61.3399	-61.8493
42	-60.8698	-58.753		-61.3662	-61.8986
43	-60.8271	-58.7957		-61.3957	-61.9085
44	-60.8632	-58.7826		-61.3596	-61.8986
45	-60.9684	-58.8451		-61.3694	-61.9611
46	-60.9684	-58.8155		-61.4615	-61.9085
47	-60.906	-58.9338		-61.3694	-61.9184
48	-60.9586	-58.9437		-61.3793	-61.9348
49	-60.9849	-58.9437		-61.3004	-61.8789
50	-60.9224	-58.8516		-61.3103	-61.8428
51	-61.09	-58.8648		-61.2314	-61.9874
52	-61.1098	-58.8516		-61.1887	-61.8395
53	-61.1525	-58.8582		-61.2281	-61.8395
54	-61.1065	-58.799		-61.2511	-61.9249
55	-61.09	-58.8878		-61.2807	-61.8198
56	-61.1196	-58.9338		-61.2412	-61.8099
57	-61.1854	-58.9042		-61.2347	-61.9184
58	-61.1919	-59.0488		-61.1492	-61.8329
59	-61.2347	-59.0718		-61.2511	-61.8395
60	-61.1722	-58.9568		-61.2215	-61.846
61	-61.1919	-58.9469		-61.2873	-61.8296
62	-61.3366	-59.0456		-61.2544	-61.8789
63	-61.3168	-59.0587		-61.2807	-61.9151
64	-61.2478	-59.016		-61.1887	-61.8888
65	-61.3267	-59.0324		-61.2938	-61.994
66	-61.2938	-59.1179		-61.1985	-61.9217
67	-61.3366	-59.1146		-61.2215	-61.8723
68	-61.4648	-59.2033		-61.1755	-61.8395
69	-61.4352	-59.2033		-61.1788	-61.7967
70	-61.5042	-59.2592		-61.2741	-61.846
71	-61.4943	-59.2822		-61.284	-61.9512
72	-61.4911	-59.1869		-61.261	-61.9019
73	-61.5239	-59.2756		-61.2643	-61.8986
74	-61.5765	-59.2263		-61.215	-61.8822
75	-61.6127	-59.2789		-61.2938	-61.9578
76	-61.5864	-59.3611		-61.3234	-61.9085
77	-61.4943	-59.3447		-61.4155	-61.9677
78	-61.4943	-59.3184		-61.4122	-61.9052
79	-61.5568	-59.3151		-61.4286	-61.8625
80	-61.5667	-59.2921		-61.4056	-61.9085
81	-61.5141	-59.2954		-61.4483	-61.8921
82	-61.5075	-59.3184		-61.4188	-61.9249
83	-61.5962	-59.2855		-61.422	-61.8329
84	-61.616	-59.3545		-61.4648	-61.9315
85	-61.5667	-59.417		-61.4878	-61.8756
86	-61.6258	-59.44		-61.4582	-61.9512
87	-61.6225	-59.371		-61.445	-61.8986
88	-61.5864	-59.3447		-61.5075	-61.9578
89	-61.616	-59.4729		-61.4976	-61.9545
90	-61.5765	-59.4762		-61.4713	-62.0466
91	-61.4845	-59.5485		-61.5535	-61.8428
92	-61.4582	-59.532		-61.5141	-61.9019
93	-61.5305	-59.5156		-61.5502	-61.8986
94	-61.5075	-59.5517		-61.5765	-61.9742
95	-61.5502	-59.5287		-61.5962	-61.9447
96	-61.4976	-59.5254		-61.5371	-61.8559
97	-61.5338	-59.5748		-61.4713	-61.8888
98	-61.5897	-59.5748		-61.5535	-61.8954
99	-61.5206	-59.5846		-61.5469	-61.9184
100	-61.4976	-59.6569		-61.5075	-61.8428
101	-61.4713	-59.6504		-61.5305	-61.9217
102	-61.4911	-59.6011		-61.5502	-61.8658
103	-61.4713	-59.5813		-61.6127	-61.8428
104	-61.445	-59.5649		-61.5272	-61.8362
105	-61.4878	-59.5945		-61.4779	-61.9019
106	-61.4352	-59.6405		-61.4352	-61.8789
107	-61.4516	-59.5254		-61.4418	-61.8954
108	-61.4779	-59.6274		-61.3892	-61.9052
109	-61.5141	-59.5846		-61.4319	-61.8033
110	-61.4516	-59.6734		-61.4779	-61.8592
111	-61.4812	-59.6241		-61.4056	-61.9545
112	-61.4812	-59.6964		-61.4418	-62.0268
113	-61.4319	-59.6208		-61.4648	-62.0203
114	-61.4615	-59.6274		-61.4188	-62.0433
115	-61.3892	-59.6011		-61.4812	-62.1287
116	-61.3333	-59.6076		-61.4582	-62.0729
117	-61.3464	-59.6438		-61.4779	-62.178
118	-61.3004	-59.6208		-61.4976	-62.1945
119	-61.3629	-59.6076		-61.4812	-62.155
120	-61.2741	-59.6241		-61.4615	-62.1452
121	-61.2511	-59.6438		-61.5206	-62.1583
122	-61.2084	-59.6569		-61.4615	-62.178
123	-61.067	-59.6898		-61.4648	-62.1978
124	-60.9914	-59.7062		-61.4878	-62.132
125	-60.9783	-59.7983		-61.4943	-62.155
126	-60.906	-59.7325		-61.4549	-62.1254
127	-60.8271	-59.6668		-61.3892	-62.0433
128	-60.7614	-59.6832		-61.5141	-62.0827
129	-60.7811	-59.7062		-61.5009	-62.0005
130	-60.6858	-59.7983		-61.4911	-61.9644
131	-60.6759	-59.7523		-61.5437	-61.9874
132	-60.6332	-59.7128		-61.4385	-61.9249
133	-60.7022	-59.7128		-61.5601	-61.9447
134	-60.6858	-59.6931		-61.5995	-62.0071
135	-60.7679	-59.6734		-61.5108	-61.9841
136	-60.6956	-59.6832		-61.5765	-62.0301
137	-60.6562	-59.6832		-61.6127	-61.9447
138	-60.6792	-59.7621		-61.5798	-61.8526
139	-60.6562	-59.7687		-61.5765	-61.8986
140	-60.6693	-59.772		-61.6291	-61.8493
141	-60.6266	-59.6997		-61.7113	-61.7803
142	-60.6036	-59.7325		-61.7737	-61.9381
143	-60.5839	-59.6931		-61.7376	-61.9217
144	-60.6003	-59.749		-61.731	-61.8362
145	-60.6167	-59.795		-61.7705	-61.8691
146	-60.574	-59.7424		-61.7672	-61.8395
147	-60.6299	-59.7884		-61.8888	-61.7836
148	-60.6266	-59.7227		-61.8362	-61.823
149	-60.6266	-59.7457		-61.9085	-61.7836
150	-60.6825	-59.795		-61.9118	-61.7672
151	-60.6989	-59.7358		-61.9151	-61.6948
152	-60.6726	-59.7292		-61.994	-61.7573
153	-60.6397	-59.726		-61.9381	-61.6948
154	-60.6233	-59.6799		-61.9381	-61.6948
155	-60.6134	-59.7194		-62.0893	-61.6817
156	-60.5806	-59.6142		-62.0761	-61.6455
157	-60.5576	-59.6734		-62.1254	-61.6784
158	-60.551	-59.6438		-62.1452	-61.5699
159	-60.5247	-59.6175		-62.1287	-61.6028
160	-60.6266	-59.6701		-62.1813	-61.4845
161	-60.5839	-59.6208		-62.2043	-61.4911
162	-60.5313	-59.6438		-62.1846	-61.376
163	-60.5904	-59.6767		-62.0794	-61.4023
164	-60.5543	-59.7227		-62.1649	-61.4713
165	-60.551	-59.6306		-62.2536	-61.422
166	-60.5839	-59.6471		-62.2931	-61.4385
167	-60.5707	-59.5682		-62.2372	-61.4483
168	-60.6102	-59.6504		-62.2931	-61.3464
169	-60.6036	-59.6504		-62.3851	-61.3563
170	-60.5411	-59.6734		-62.3917	-61.4056
171	-60.5411	-59.6504		-62.3588	-61.4188
172	-60.6167	-59.6405		-62.4377	-61.4155
173	-60.6627	-59.6602		-62.3983	-61.4253
174	-60.6102	-59.7424		-62.4574	-61.5141
175	-60.6365	-59.6832		-62.5232	-61.4056
176	-60.5806	-59.7194		-62.5363	-61.3859
177	-60.6693	-59.6701		-62.5462	-61.3892
178	-60.6365	-59.6832		-62.4969	-61.4056
179	-60.5411	-59.703		-62.5626	-61.4188
180	-60.5543	-59.6701		-62.5758	-61.3957
181	-60.5411	-59.6372		-62.6283	-61.4122
182	-60.597	-59.7128		-62.6316	-61.4779
183	-60.6134	-59.5616		-62.7368	-61.4516
184	-60.62	-59.5353		-62.6678	-61.4878
185	-60.5346	-59.5813		-62.6448	-61.5765
186	-60.3735	-59.5287		-62.5889	-61.5272
187	-60.3801	-59.5189		-62.6316	-61.4943
188	-60.3242	-59.6011		-62.6349	-61.5601
189	-60.3735	-59.5649		-62.6349	-61.5798
190	-60.3538	-59.5616		-62.6744	-61.5469
191	-60.334	-59.509		-62.6777	-61.5338
192	-60.3045	-59.5156		-62.5856	-61.5502
193	-60.2782	-59.5156		-62.5363	-61.5272
194	-60.2387	-59.4926		-62.579	-61.5437
195	-60.2256	-59.4663		-62.5725	-61.5798
196	-60.1828	-59.4071		-62.5626	-61.6455
197	-60.2124	-59.3808		-62.5593	-61.5897
198	-60.196	-59.4334		-62.6218	-61.6193
199	-60.0875	-59.3578		-62.4969	-61.6258
200	-60.1072	-59.3644		-62.5265	-61.5535
201	-60.0316	-59.325		-62.5067	-61.6324
202	-59.9593	-59.325		-62.5363	-61.5239
203	-59.9067	-59.3019		-62.4443	-61.639
204	-59.8969	-59.2066		-62.5067	-61.6784
205	-59.9035	-59.154		-62.4936	-61.5897
206	-59.8574	-59.0718		-62.3983	-61.6061
207	-59.9166	-59.0193		-62.4311	-61.5469
208	-59.8607	-59.016		-62.4837	-61.5338
209	-59.8607	-59.108		-62.533	-61.5404
210	-59.7194	-59.0686		-62.5528	-61.5568
211	-59.7555	-59.0488		-62.5626	-61.6094
212	-59.818	-59.085		-62.5297	-61.6817
213	-59.8969	-59.039		-62.5002	-61.7474
214	-59.8706	-59.0094		-62.3983	-61.6653
215	-59.9265	-58.9009		-62.4114	-61.6324
216	-59.8706	-58.9338		-62.3161	-61.7376
217	-59.8673	-58.9371		-62.4048	-61.7836
218	-59.887	-58.9437		-62.3259	-61.8362
219	-59.8772	-58.9634		-62.3983	-61.8329
220	-59.8903	-58.9042		-62.4443	-61.8198
221	-59.9593	-58.9798		-62.4048	-61.7672
222	-60.0349	-58.9239		-62.4311	-61.8066
223	-59.9692	-58.9305		-62.4081	-61.7244
224	-59.9626	-58.9305		-62.4541	-61.7803
225	-60.0316	-58.9437		-62.3555	-61.8296
226	-60.0875	-58.9404		-62.4509	-61.8198
227	-60.0744	-58.9568		-62.4509	-61.8822
228	-60.1237	-58.9174		-62.4213	-61.8855
229	-60.2223	-58.8582		-62.4213	-61.9677
230	-60.2453	-58.8352		-62.4574	-61.9841
231	-60.3242	-58.8714		-62.3851	-62.0235
232	-60.334	-58.8845		-62.418	-61.9578
233	-60.3538	-58.9239		-62.3621	-61.8691
234	-60.4064	-58.9239		-62.349	-61.8592
235	-60.4918	-58.9075		-62.3851	-61.8625
236	-60.5378	-58.9667		-62.395	-61.8559
237	-60.4392	-58.9601		-62.3227	-61.8428
238	-60.482	-58.993		-62.3555	-61.7376
239	-60.4392	-58.9963		-62.4541	-61.7737
240	-60.5378	-58.9502		-62.4377	-61.7967
241	-60.528	-58.9174		-62.4081	-61.846
242	-60.5378	-58.9239		-62.4443	-61.8691
243	-60.5773	-58.8944		-62.4673	-61.8263
244	-60.62	-58.8779		-62.464	-61.8198
245	-60.6595	-58.9634		-62.4443	-61.8625
246	-60.5839	-58.9831		-62.4706	-61.9381
247	-60.6365	-58.9963		-62.5067	-61.8986
248	-60.6627	-58.8878		-62.4706	-62.0827
249	-60.6397	-58.8944		-62.4509	-62.0334
250	-60.712	-58.8648		-62.4311	-61.9447
251	-60.643	-58.8122		-62.4673	-61.9841
252	-60.7351	-58.8418		-62.5002	-61.8921
253	-60.7581	-58.9108		-62.4213	-61.9315
254	-60.7909	-58.7497		-62.4936	-61.9742
255	-60.8008	-58.7333		-62.5166	-62.0104
256	-60.8139	-58.7497		-62.3818	-61.9578
257	-60.8271	-58.6544		-62.3358	-62.0334
258	-60.8074	-58.6643		-62.3917	-61.9644
259	-60.8172	-58.6281		-62.3555	-61.8921
260	-60.837	-58.6906		-62.3292	-61.9019
261	-60.9191	-58.6478		-62.4311	-61.8592
262	-60.9421	-58.5887		-62.372	-61.8855
263	-60.9158	-58.5854		-62.2832	-61.8132
264	-60.8895	-58.5722		-62.2273	-61.8
265	-60.8797	-58.5427		-62.2306	-61.8033
266	-60.952	-58.5262		-62.2405	-61.8691
267	-60.8764	-58.4572		-62.1649	-61.9512
268	-60.906	-58.5525		-62.1452	-61.9742
269	-61.0112	-58.5591		-62.132	-61.9644
270	-60.952	-58.444		-62.1485	-61.9545
271	-61.0046	-58.5131		-62.1123	-61.9874
272	-61.0375	-58.4769		-62.1189	-61.9973
273	-60.9224	-58.4473		-62.1748	-61.9874
274	-60.9882	-58.4966		-62.0268	-61.9677
275	-60.9257	-58.4276		-61.9841	-61.9742
276	-60.8698	-58.3553		-61.9742	-61.9841
277	-60.8304	-58.3586		-61.8756	-62.0367
278	-60.9224	-58.4079		-61.9315	-61.9841
279	-60.929	-58.3553		-61.7869	-62.0301
280	-60.9717	-58.3027		-61.8395	-62.0959
281	-60.9651	-58.3323		-61.7639	-62.0991
282	-60.8895	-58.306		-61.7277	-62.086
283	-60.8928	-58.306		-61.7113	-62.086
284	-60.8994	-58.3191		-61.7639	-62.0959
285	-60.9027	-58.352		-61.7409	-62.1715
286	-60.837	-58.2205		-61.7442	-62.1287
287	-60.8698	-58.2698		-61.7442	-62.0893
288	-60.9224	-58.2633		-61.6488	-62.109
289	-60.8501	-58.2271		-61.5667	-62.0794
290	-60.8961	-58.2172		-61.5897	-62.0794
291	-60.8895	-58.2403		-61.6423	-62.017
292	-60.8797	-58.214		-61.6718	-62.017
293	-60.9619	-58.2797		-61.8033	-61.9775
294	-60.9093	-58.2764		-61.7376	-61.994
295	-60.8994	-58.2994		-61.7277	-61.9775
296	-60.975	-58.2238		-61.7277	-61.9348
297	-61.0309	-58.2008		-61.6916	-61.9907
298	-60.9717	-58.2172		-61.662	-62.0038
299	-61.0835	-58.1679		-61.639	-62.1057
300	-61.0802	-58.1975		-61.639	-62.017
301	-61.0309	-58.283		-61.6455	-62.0367
302	-61.0177	-58.1449		-61.616	-61.9973
303	-61.0112	-58.1942		-61.5897	-62.0071
304	-61.0473	-58.1909		-61.6423	-62.0827
305	-60.9947	-58.1811		-61.5995	-62.0268
306	-61.0966	-58.1384		-61.593	-61.9315
307	-61.0243	-58.0365		-61.6686	-61.846
308	-61.09	-58.0266		-61.6916	-61.9282
309	-61.1032	-58.0102		-61.639	-61.8888
310	-61.2906	-58.0003		-61.6554	-61.8954
311	-61.33	-57.859		-61.6455	-61.9381
312	-61.4516	-57.9181		-61.5995	-61.8395
313	-61.445	-57.8918		-61.6455	-61.8198
314	-61.4155	-57.928		-61.5962	-61.7507
315	-61.3234	-57.9148		-61.5305	-61.7507
316	-61.3366	-57.9806		-61.5798	-61.8099
317	-61.4023	-57.9609		-61.5568	-61.7474
318	-61.3629	-57.8688		-61.6028	-61.7442
319	-61.4582	-57.8031		-61.5338	-61.7507
320	-61.4188	-57.8853		-61.5601	-61.7146
321	-61.4812	-57.8557		-61.5765	-61.731
322	-61.5009	-57.7834		-61.5601	-61.7442
323	-61.5404	-57.6815		-61.5667	-61.6883
324	-61.5272	-57.7472		-61.5897	-61.6258
325	-61.5404	-57.7538		-61.6193	-61.7047
326	-61.5962	-57.6059		-61.6094	-61.6817
327	-61.5601	-57.688		-61.6094	-61.6357
328	-61.6028	-57.7373		-61.6653	-61.6653
329	-61.6488	-57.6552		-61.6751	-61.6751
330	-61.6127	-57.7472		-61.6258	-61.7113
331	-61.6225	-57.7143		-61.5502	-61.731
332	-61.6686	-57.7209		-61.5371	-61.6981
333	-61.7507	-57.6519		-61.6488	-61.6324
334	-61.7705	-57.6848		-61.616	-61.6291
335	-61.7113	-57.6453		-61.5732	-61.616
336	-61.8099	-57.7045		-61.5469	-61.6718
337	-61.8033	-57.7702		-61.6686	-61.6948
338	-61.7376	-57.8425		-61.6521	-61.7343
339	-61.7902	-57.8064		-61.5962	-61.7573
340	-61.8395	-57.8853		-61.593	-61.7573
341	-61.8066	-57.882		-61.6488	-61.7343
342	-61.8263	-57.8754		-61.6751	-61.7014
343	-61.846	-57.928		-61.708	-61.6291
344	-61.7902	-57.9411		-61.777	-61.5864
345	-61.7376	-57.928		-61.662	-61.4779
346	-61.7836	-58.0332		-61.685	-61.4582
347	-61.8263	-58.0069		-61.7179	-61.5239
348	-61.8526	-58.0496		-61.7705	-61.5305
349	-61.7376	-58.0299		-61.7343	-61.5798
350	-61.7507	-58.0397		-61.7442	-61.5995
351	-61.7606	-58.1022		-61.7244	-61.6127
352	-61.8	-58.0332		-61.7705	-61.6488
353	-61.7902	-58.1121		-61.7376	-61.6686
354	-61.8493	-58.0266		-61.8165	-61.6587
355	-61.8691	-58.0365		-61.7277	-61.6488
356	-61.7869	-57.9576		-61.7409	-61.5995
357	-61.7442	-57.9379		-61.7014	-61.5174
358	-61.8198	-58.0167		-61.7737	-61.5699
359	-61.8099	-57.9937		-61.7047	-61.5469
360	-61.8888	-57.9839		-61.6587	-61.6225
361	-61.8099	-57.9313		-61.7014	-61.6324
362	-61.8395	-57.9313		-61.6455	-61.5798
363	-61.8592	-57.9674		-61.6094	-61.5831
364	-61.7967	-57.9313		-61.5502	-61.616
365	-61.7376	-57.9806		-61.6423	-61.593
366	-61.7409	-57.9543		-61.6225	-61.616
367	-61.6817	-57.8425		-61.4976	-61.6916
368	-61.7409	-57.8622		-61.4911	-61.708
369	-61.7573	-57.7834		-61.4615	-61.5272
370	-61.7836	-57.7998		-61.4483	-61.6258
371	-61.7803	-57.8458		-61.33	-61.6357
372	-61.7737	-57.8162		-61.3694	-61.5831
373	-61.7935	-57.8097		-61.3136	-61.6751
374	-61.8789	-57.7341		-61.2643	-61.6455
375	-61.8033	-57.7242		-61.353	-61.6291
376	-61.7935	-57.7636		-61.2643	-61.6521
377	-61.7967	-57.7439		-61.2248	-61.6948
378	-61.9217	-57.6782		-61.1919	-61.6258
379	-61.8888	-57.6387		-61.1689	-61.6258
380	-61.8921	-57.5894		-61.1525	-61.6028
381	-61.971	-57.6124		-61.1065	-61.5699
382	-61.8658	-57.619		-61.1755	-61.6686
383	-61.8493	-57.6157		-61.1525	-61.7047
384	-61.8559	-57.619		-61.1624	-61.639
385	-61.7639	-57.642		-61.1591	-61.6981
386	-61.8165	-57.5566		-61.1952	-61.7014
387	-61.8789	-57.5861		-61.1361	-61.7869
388	-61.9414	-57.5861		-61.215	-61.6258
389	-61.8986	-57.5467		-61.2051	-61.685
390	-61.9841	-57.6091		-61.2412	-61.6357
391	-61.9249	-57.619		-61.2018	-61.708
392	-61.9118	-57.619		-61.2445	-61.6521
393	-61.9151	-57.5303		-61.2807	-61.6094
394	-61.9611	-57.6486		-61.261	-61.6225
395	-61.9775	-57.5434		-61.2774	-61.6554
396	-61.9019	-57.5631		-61.2643	-61.6357
397	-61.9578	-57.5763		-61.238	-61.5206
398	-62.0926	-57.527		-61.1689	-61.5141
399	-62.0761	-57.5533		-61.2314	-61.4943
400	-62.0433	-57.596		-61.2544	-61.4779
401	-62.086	-57.642		-61.307	-61.4516
402	-62.0827	-57.5467		-61.4319	-61.422
403	-62.0301	-57.5631		-61.3366	-61.4385
404	-61.9808	-57.6157		-61.3563	-61.3957
405	-61.9973	-57.5861		-61.3004	-61.3826
406	-61.9907	-57.5993		-61.3267	-61.3464
407	-62.0005	-57.527		-61.3793	-61.3136
408	-62.0597	-57.4875		-61.3957	-61.2873
409	-61.9874	-57.4218		-61.4319	-61.1952
410	-62.0235	-57.3922		-61.4056	-61.2807
411	-62.0433	-57.4185		-61.4056	-61.2511
412	-62.0466	-57.3429		-61.3925	-61.33
413	-62.0466	-57.3856		-61.3662	-61.2314
414	-62.0433	-57.3429		-61.4056	-61.2741
415	-62.132	-57.3265		-61.4122	-61.1952
416	-62.0301	-57.3363		-61.4516	-61.1854
417	-61.9479	-57.3462		-61.4746	-61.1591
418	-61.9841	-57.4251		-61.4648	-61.1722
419	-61.9381	-57.4481		-61.5437	-61.1459
420	-61.9512	-57.4251		-61.5667	-61.0966
421	-61.9512	-57.4251		-61.639	-61.09
422	-61.9611	-57.4251		-61.662	-61.0999
423	-61.8428	-57.4349		-61.6883	-61.0966
424	-61.8	-57.4185		-61.6718	-61.0112
425	-61.8526	-57.4152		-61.7047	-61.1065
426	-61.8033	-57.4448		-61.7211	-61.1131
427	-61.8362	-57.5894		-61.7146	-61.1032
428	-61.9019	-57.5073		-61.6653	-61.044
429	-61.9019	-57.504		-61.6686	-60.9882
430	-61.9414	-57.527		-61.7442	-60.998
431	-61.9808	-57.5467		-61.7244	-61.0407
432	-61.9512	-57.504		-61.6883	-61.0177
433	-61.9611	-57.527		-61.6324	-61.1229
434	-61.8789	-57.5599		-61.6094	-61.1394
435	-61.9151	-57.4612		-61.6423	-61.0802
436	-61.8691	-57.5204		-61.6521	-61.0506
437	-61.823	-57.4744		-61.5535	-61.1821
438	-61.8198	-57.4612		-61.4483	-61.1229
439	-61.8198	-57.4185		-61.4582	-61.0802
440	-61.8	-57.4547		-61.3957	-61.0966
441	-61.8658	-57.4054		-61.33	-61.1098
442	-61.8099	-57.4021		-61.3793	-61.2084
443	-61.8789	-57.3331		-61.33	-61.1985
444	-61.8493	-57.3659		-61.3267	-61.2412
445	-61.9512	-57.4054		-61.33	-61.3168
446	-61.8789	-57.3265		-61.2906	-61.2938
447	-61.9085	-57.3659		-61.3464	-61.2445
448	-61.9644	-57.3462		-61.2248	-61.2412
449	-61.8296	-57.3528		-61.261	-61.1887
450	-61.8362	-57.3363		-61.1624	-61.2906
451	-61.8428	-57.3068		-61.1591	-61.2906
452	-61.8888	-57.3626		-61.2084	-61.3431
453	-61.8	-57.2509		-61.1163	-61.3925
454	-61.7672	-57.2246		-61.044	-61.4286
455	-61.7474	-57.264		-61.0079	-61.3957
456	-61.7737	-57.218		-60.9914	-61.4352
457	-61.7507	-57.1884		-61.0243	-61.4878
458	-61.7672	-57.1556		-60.9816	-61.4713
459	-61.8132	-57.0438		-60.9717	-61.5239
460	-61.8395	-57.0537		-60.9651	-61.5042
461	-61.8428	-57.0734		-60.9849	-61.5437
462	-61.8756	-57.0372		-60.8402	-61.5502
463	-61.8625	-56.9846		-60.8928	-61.7113
464	-61.8099	-56.9912		-60.9126	-61.7277
465	-61.7737	-56.9715		-60.8698	-61.8263
466	-61.7409	-56.9748		-60.9027	-61.7409
467	-61.7343	-57.0241		-60.9093	-61.7836
468	-61.7146	-57.0011		-60.906	-61.7507
469	-61.7277	-56.9353		-60.9684	-61.777
470	-61.7277	-56.9485		-60.9849	-61.7869
471	-61.7113	-57.0011		-60.9224	-61.8066
472	-61.7935	-57.0076		-60.9126	-61.7935
473	-61.7211	-56.9123		-60.9717	-61.8296
474	-61.7672	-56.9222		-60.9126	-61.8625
475	-61.7902	-57.0109		-61.0539	-61.9019
476	-61.7244	-56.863		-61.0375	-61.8559
477	-61.6751	-56.9025		-61.0309	-61.9381
478	-61.754	-56.9386		-61.0703	-61.9118
479	-61.7902	-56.8827		-61.1525	-61.8756
480	-61.7902	-56.909		-61.1229	-61.8921
481	-61.7935	-56.9485		-61.1032	-61.9052
482	-61.8033	-56.9156		-61.1788	-61.8296
483	-61.8493	-56.9616		-61.2478	-61.8395
484	-61.8198	-56.9353		-61.3267	-61.6916
485	-61.9118	-56.8433		-61.3267	-61.7277
486	-61.971	-56.9156		-61.3037	-61.7967
487	-61.9973	-56.8334		-61.261	-61.823
488	-62.0301	-56.8006		-61.2478	-61.8
489	-61.9907	-56.863		-61.2182	-61.7442
490	-62.0235	-56.8466		-61.2774	-61.7573
491	-62.0794	-56.8466		-61.3201	-61.708
492	-62.0104	-56.8071		-61.3431	-61.6455
493	-62.0268	-56.8367		-61.376	-61.6094
494	-62.0367	-56.84		-61.445	-61.5535
495	-62.0466	-56.8006		-61.4911	-61.4878
496	-62.1715	-56.8203		-61.4812	-61.4878
497	-62.1517	-56.8696		-61.5338	-61.4648
498	-62.2504	-56.8367		-61.4418	-61.4812
499	-62.2339	-56.8564		-61.4943	-61.4812
500	-62.1945	-56.8334		-61.5239	-61.376
501	-62.2339	-56.8006		-61.5732	-61.3563
502	-62.2471	-56.8564		-61.6554	-61.353
503	-62.2372	-56.8893		-61.6028	-61.445
504	-62.1879	-56.8532		-61.5667	-61.4089
505	-62.1583	-56.8827		-61.5009	-61.4648
506	-62.132	-56.9222		-61.6028	-61.5042
507	-62.017	-56.932		-61.5864	-61.4385
508	-62.0663	-57.0109		-61.5798	-61.4943
509	-61.9841	-57.0339		-61.6193	-61.4976
510	-61.9973	-57.1161		-61.5732	-61.3859
511	-62.017	-57.0635		-61.6127	-61.4549
512	-62.1057	-57.0274		-61.6455	-61.4418
513	-61.9841	-57.0898		-61.5995	-61.445
514	-61.9249	-57.0405		-61.6127	-61.4385
515	-61.9217	-57.0405		-61.6127	-61.445
516	-61.9611	-57.0339		-61.5897	-61.5568
517	-61.9085	-57.1588		-61.616	-61.4253
518	-61.9282	-57.0832		-61.5667	-61.445
519	-61.9019	-57.0438		-61.5699	-61.3727
520	-61.8625	-57.0997		-61.5075	-61.4056
521	-61.8658	-57.0274		-61.4976	-61.4385
522	-61.8	-57.0504		-61.5338	-61.4286
523	-61.8428	-57.0832		-61.5568	-61.4352
524	-61.7705	-57.1325		-61.4976	-61.4582
525	-61.6981	-57.0931		-61.4385	-61.4681
526	-61.6718	-57.0964		-61.4352	-61.3957
527	-61.6061	-57.0997		-61.3793	-61.4648
528	-61.4943	-57.0076		-61.422	-61.3892
529	-61.422	-57.0701		-61.4089	-61.4549
530	-61.3563	-56.8926		-61.3793	-61.4516
531	-61.4122	-56.8499		-61.3333	-61.4352
532	-61.445	-56.8532		-61.3333	-61.4188
533	-61.4188	-56.817		-61.3431	-61.3793
534	-61.3957	-56.725		-61.4188	-61.3037
535	-61.4122	-56.6559		-61.3596	-61.3596
536	-61.3431	-56.5738		-61.3727	-61.3464
537	-61.33	-56.6132		-61.422	-61.307
538	-61.3859	-56.485		-61.4648	-61.3201
539	-61.3333	-56.4291		-61.5009	-61.2971
540	-61.4122	-56.4489		-61.4713	-61.2708
541	-61.4549	-56.3503		-61.4023	-61.2741
542	-61.3464	-56.2779		-61.4746	-61.2117
543	-61.4549	-56.3437		-61.5272	-61.2445
544	-61.4122	-56.2056		-61.5568	-61.1755
545	-61.3431	-56.1695		-61.5239	-61.1262
546	-61.3596	-56.13		-61.5634	-61.1887
547	-61.4483	-56.0939		-61.5798	-61.1722
548	-61.4582	-56.0446		-61.6554	-61.1492
549	-61.4188	-56.0741		-61.6324	-61.1854
550	-61.3793	-55.9755		-61.6981	-61.1854
551	-61.376	-55.9032		-61.7606	-61.2248
552	-61.4352	-55.8736		-61.8033	-61.2215
553	-61.3925	-55.8802		-61.7343	-61.3694
554	-61.4911	-55.8506		-61.6981	-61.4023
555	-61.4943	-55.7356		-61.7573	-61.3596
556	-61.5272	-55.752		-61.7409	-61.3596
557	-61.4779	-55.6238		-61.7967	-61.3596
558	-61.5601	-55.614		-61.8592	-61.4286
559	-61.5897	-55.614		-61.8756	-61.4681
560	-61.5437	-55.614		-61.9085	-61.4976
561	-61.593	-55.5318		-62.0005	-61.5502
562	-61.6357	-55.4595		-61.9841	-61.5371
563	-61.685	-55.3576		-61.9348	-61.5075
564	-61.639	-55.3937		-62.017	-61.6686
565	-61.6521	-55.3707		-62.017	-61.6784
566	-61.6751	-55.374		-62.1254	-61.731
567	-61.7014	-55.3576		-62.0696	-61.7211
568	-61.6948	-55.3576		-62.1156	-61.6981
569	-61.6653	-55.3412		-62.155	-61.7376
570	-61.6423	-55.351		-62.2339	-61.7573
571	-61.6784	-55.3839		-62.086	-61.8033
572	-61.6554	-55.351		-62.0235	-61.7672
573	-61.6751	-55.3642		-62.0268	-61.7935
574	-61.6948	-55.3543		-62.0729	-61.8986
575	-61.662	-55.305		-62.1715	-61.7869
576	-61.6981	-55.2853		-62.2043	-61.8526
577	-61.7211	-55.2886		-62.2569	-61.8395
578	-61.7343	-55.2656		-62.2273	-61.8428
579	-61.731	-55.3247		-62.2865	-61.8
580	-61.7967	-55.2425		-62.2438	-61.6948
581	-61.8132	-55.2656		-62.2306	-61.7705
582	-61.8362	-55.2425		-62.2799	-61.7409
583	-61.7376	-55.2721		-62.2306	-61.7442
584	-61.7573	-55.2425		-62.2635	-61.8362
585	-61.7869	-55.2163		-62.3588	-61.8362
586	-61.7935	-55.2491		-62.3687	-61.8789
587	-61.8165	-55.2721		-62.4048	-61.971
588	-61.8559	-55.3543		-62.4147	-61.9447
589	-61.8691	-55.2984		-62.3621	-61.994
590	-61.8362	-55.2393		-62.3358	-61.9217
591	-61.823	-55.3149		-62.4081	-61.9249
592	-61.7902	-55.3313		-62.3424	-61.9611
593	-61.8	-55.4102		-62.3818	-62.0301
594	-61.7211	-55.4102		-62.3588	-62.0071
595	-61.7639	-55.3149		-62.3391	-62.0498
596	-61.6948	-55.3543		-62.3884	-61.9808
597	-61.6653	-55.3313		-62.2602	-62.0334
598	-61.7047	-55.328		-62.2668	-61.9052
599	-61.616	-55.3214		-62.2306	-61.9973
600	-61.6193	-55.3839		-62.3161	-61.994
601	-61.5075	-55.4135		-62.3818	-62.0268
602	-61.4122	-55.4135		-62.3292	-62.0235
603	-61.376	-55.3609		-62.395	-62.1222
604	-61.3694	-55.2754		-62.4114	-62.155
605	-61.3333	-55.2853		-62.4278	-62.1649
606	-61.3004	-55.2623		-62.4213	-62.1287
607	-61.2117	-55.328		-62.3753	-62.0696
608	-61.261	-55.3214		-62.4246	-62.1353
609	-61.2084	-55.3313		-62.4673	-62.1452
610	-61.2051	-55.2393		-62.4081	-62.155
611	-61.2084	-55.2984		-62.4114	-62.1945
612	-61.1821	-55.2853		-62.3029	-62.1287
613	-61.1624	-55.2491		-62.3259	-62.2142
614	-61.2018	-55.2787		-62.4081	-62.1715
615	-61.1426	-55.2557		-62.4048	-62.1682
616	-61.1788	-55.3346		-62.4804	-62.0729
617	-61.1459	-55.2853		-62.441	-62.0991
618	-61.1459	-55.3543		-62.4278	-62.1222
619	-61.0375	-55.2853		-62.418	-62.0959
620	-61.0539	-55.2623		-62.3917	-62.1452
621	-61.044	-55.3116		-62.4048	-62.1123
622	-61.0802	-55.3313		-62.3259	-62.1024
623	-61.0473	-55.2393		-62.372	-62.1287
624	-61.0769	-55.2393		-62.3325	-62.1024
625	-61.0407	-55.236		-62.2306	-62.1419
626	-61.0079	-55.2656		-62.2471	-62.2175
627	-60.9947	-55.2195		-62.2405	-62.1813
628	-61.0342	-55.2787		-62.3358	-62.1057
629	-61.0046	-55.2688		-62.2701	-62.178
630	-61.021	-55.2688		-62.3851	-62.1517
631	-60.9224	-55.2656		-62.3325	-62.2076
632	-60.9586	-55.2425		-62.3358	-62.1057
633	-60.9586	-55.1768		-62.3785	-62.0301
634	-60.9126	-55.1374		-62.349	-62.0433
635	-60.9816	-55.1735		-62.395	-61.9874
636	-60.9257	-55.0585		-62.3588	-62.0564
637	-60.8698	-55.0749		-62.3424	-61.9447
638	-60.8994	-55.0848		-62.3325	-61.9677
639	-60.8435	-55.0749		-62.4048	-61.9545
640	-60.8139	-55.0585		-62.4081	-62.0038
641	-60.8271	-55.0256		-62.4476	-62.0005
642	-60.8435	-54.9829		-62.4016	-61.994
643	-60.8764	-54.9862		-62.4574	-61.994
644	-60.8961	-54.9993		-62.4278	-61.9677
645	-60.8337	-55.0256		-62.51	-61.9217
646	-60.9126	-55.0815		-62.6021	-61.8658
647	-60.9783	-55.1144		-62.5593	-61.8888
648	-61.0243	-55.0486		-62.51	-61.8395
649	-60.906	-55.0355		-62.6579	-61.7014
650	-60.952	-54.9796		-62.6021	-61.7672
651	-60.9454	-54.9369		-62.6514	-61.6883
652	-60.9717	-54.95		-62.6711	-61.662
653	-61.0276	-54.9796		-62.6612	-61.6784
654	-61.0638	-54.9993		-62.7237	-61.6258
655	-61.0144	-54.9204		-62.6579	-61.5962
656	-61.0506	-54.8645		-62.6842	-61.5601
657	-61.0079	-54.8448		-62.7598	-61.5305
658	-61.0177	-54.9204		-62.7894	-61.4713
659	-61.0835	-54.9171		-62.796	-61.4188
660	-61.1098	-54.9664		-62.7861	-61.3793
661	-61.1262	-54.9599		-62.727	-61.4023
662	-61.0933	-54.973		-62.75	-61.445
663	-61.1262	-54.9927		-62.8584	-61.4943
664	-61.1131	-55.0355		-62.7927	-61.3793
665	-61.2084	-55.0092		-62.8157	-61.2873
666	-61.1952	-54.9927		-62.8749	-61.2478
667	-61.1722	-55.0782		-62.9176	-61.2248
668	-61.1426	-55.2097		-62.9406	-61.3037
669	-61.1755	-55.1472		-62.9735	-61.1919
670	-61.1952	-55.1538		-62.9538	-61.2051
671	-61.1985	-55.2294		-62.9768	-61.2248
672	-61.2182	-55.1144		-62.9571	-61.2708
673	-61.1854	-55.1702		-63.1115	-61.2906
674	-61.2248	-55.2327		-63.0885	-61.2314
675	-61.0933	-55.1571		-63.1115	-61.1985
676	-61.1821	-55.2623		-63.1148	-61.1788
677	-61.1788	-55.1801		-63.1115	-61.1229
678	-61.1952	-55.1637		-63.2167	-61.1591
679	-61.1887	-55.2623		-63.22	-61.1295
680	-61.1755	-55.2228		-63.2594	-61.1722
681	-61.1361	-55.2688		-63.174	-61.1459
682	-61.1361	-55.305		-63.2266	-61.1032
683	-61.0276	-55.397		-63.197	-61.215
684	-60.9717	-55.3444		-63.2825	-61.1985
685	-61.0473	-55.3872		-63.2627	-61.1262
686	-61.044	-55.3609		-63.2562	-61.0933
687	-61.0013	-55.3773		-63.2003	-61.0933
688	-60.9684	-55.397		-63.2134	-61.0177
689	-60.8928	-55.4233		-63.2463	-61.0605
690	-60.9027	-55.4332		-63.1674	-61.0769
691	-60.9487	-55.5022		-63.266	-61.0046
692	-60.9586	-55.5187		-63.3088	-60.9882
693	-60.9093	-55.4299		-63.3022	-61.0375
694	-60.8107	-55.5975		-63.289	-60.9553
695	-60.7449	-55.5351		-63.2857	-60.9882
696	-60.7416	-55.5417		-63.2726	-60.929
697	-60.7383	-55.6403		-63.197	-60.9454
698	-60.6956	-55.6698		-63.1444	-60.8665
699	-60.6397	-55.6501		-63.174	-60.8008
700	-60.5411	-55.706		-63.2069	-60.7318
701	-60.4918	-55.7356		-63.1773	-60.8172
702	-60.528	-55.798		-63.1608	-60.7745
703	-60.5017	-55.683		-63.1839	-60.7975
704	-60.4524	-55.6961		-63.0721	-60.8074
705	-60.4688	-55.7192		-63.1017	-60.7877
706	-60.4359	-55.8178		-63.1148	-60.7285
707	-60.4918	-55.8999		-63.1181	-60.7942
708	-60.5346	-55.8901		-63.0852	-60.8074
709	-60.4557	-55.9098		-63.1773	-60.8074
710	-60.4458	-55.9427		-63.2233	-60.8402
711	-60.4951	-55.9657		-63.1641	-60.8205
712	-60.5806	-55.9492		-63.2069	-60.8994
713	-60.5477	-55.8901		-63.1641	-60.8567
714	-60.4951	-55.8704		-63.1641	-60.8797
715	-60.4885	-55.9328		-63.0885	-60.8928
716	-60.4359	-55.8638		-63.0787	-60.9586
717	-60.4721	-55.923		-63.0458	-60.952
718	-60.4096	-55.8999		-63.0458	-60.952
719	-60.3768	-55.9624		-63.0622	-60.8534
720	-60.3636	-55.8934		-63.0162	-60.8501
721	-60.3209	-55.946		-62.9965	-60.9027
722	-60.3603	-55.9065		-62.8814	-60.8895
723	-60.3538	-55.8999		-62.9275	-60.9356
724	-60.3866	-55.9131		-62.9439	-60.9356
725	-60.3472	-55.9427		-62.9669	-60.9323
726	-60.3801	-55.8375		-62.9308	-60.952
727	-60.4852	-55.8769		-62.8946	-60.8928
728	-60.5214	-55.9065		-62.8913	-60.9684
729	-60.5115	-55.9164		-62.8716	-60.9914
730	-60.4885	-55.9953		-62.9045	-60.929
731	-60.4425	-55.9755		-62.888	-60.9257
732	-60.4918	-56.0741		-62.9275	-60.8764
733	-60.482	-56.015		-62.8782	-60.9356
734	-60.5674	-56.0741		-62.9209	-60.8895
735	-60.6003	-56.0774		-62.9012	-60.9093
736	-60.6759	-56.0347		-62.9012	-60.9257
737	-60.6693	-56.1004		-62.9143	-60.8863
738	-60.7548	-56.0479		-62.9143	-60.9586
739	-60.7877	-56.0939		-63.0195	-60.975
740	-60.8008	-56.1366		-62.8683	-60.9191
741	-60.8895	-56.107		-62.8683	-60.9553
742	-60.9027	-56.1169		-62.8354	-60.9651
743	-60.9816	-56.0709		-62.8387	-60.9651
744	-61.0342	-56.0774		-62.9045	-60.9586
745	-60.9914	-56.0676		-62.7763	-60.9323
746	-61.0506	-56.0643		-62.7401	-60.9849
747	-61.1328	-56.0774		-62.6908	-60.929
748	-61.2577	-56.1136		-62.6678	-60.8698
749	-61.3793	-56.1136		-62.6448	-60.9191
750	-61.3694	-55.9262		-62.7335	-60.975
751	-61.2708	-55.923		-62.6711	-60.9093
752	-61.3925	-55.9164		-62.5856	-60.8074
753	-61.5141	-55.8736		-62.6185	-60.8665
754	-61.4056	-55.8704		-62.6382	-60.8632
755	-61.4385	-55.9328		-62.5725	-60.8435
756	-61.5272	-55.8473		-62.6152	-60.7844
757	-61.5338	-55.8572		-62.6415	-60.8139
758	-61.5568	-55.8835		-62.6481	-60.7778
759	-61.6193	-55.9032		-62.6053	-60.7811
760	-61.6686	-55.9525		-62.6711	-60.7252
761	-61.7047	-55.8769		-62.6579	-60.7548
762	-61.7507	-55.821		-62.6546	-60.8139
763	-61.7836	-55.7849		-62.5692	-60.7844
764	-61.7672	-55.7685		-62.6021	-60.7712
765	-61.8296	-55.7717		-62.6185	-60.6989
766	-61.8198	-55.8112		-62.5692	-60.8402
767	-61.8329	-55.8013		-62.4804	-60.7581
768	-61.8691	-55.706		-62.4574	-60.7482
769	-61.9019	-55.8342		-62.487	-60.6825
770	-61.8362	-55.8901		-62.4607	-60.7153
771	-61.971	-55.8539		-62.4048	-60.6529
772	-61.9249	-55.8079		-62.4476	-60.6726
773	-61.9611	-55.8112		-62.395	-60.7055
774	-62.0104	-55.8145		-62.441	-60.62
775	-62.0071	-55.8408		-62.3917	-60.6496
776	-62.0038	-55.8605		-62.395	-60.6102
777	-61.9973	-55.9394		-62.3424	-60.6134
778	-62.0466	-55.9755		-62.2405	-60.6134
779	-62.0137	-56.038		-62.2471	-60.62
780	-62.0827	-56.0479		-62.2832	-60.6069
781	-62.0268	-56.0051		-62.1945	-60.6003
782	-61.9973	-56.0906		-62.2536	-60.6989
783	-62.0564	-56.0281		-62.155	-60.6792
784	-62.0466	-56.0643		-62.1616	-60.6858
785	-62.0663	-56.038		-62.1485	-60.6595
786	-62.1945	-56.0446		-62.0729	-60.7022
787	-62.2372	-56.1169		-61.9973	-60.6825
788	-62.2405	-56.0972		-61.9545	-60.6792
789	-62.2471	-56.0873		-62.0005	-60.7515
790	-62.2766	-56.1234		-61.9775	-60.7022
791	-62.3391	-56.2615		-62.017	-60.7252
792	-62.3227	-56.1958		-61.9874	-60.7778
793	-62.4048	-56.2746		-61.9808	-60.7252
794	-62.5429	-56.2944		-61.971	-60.7186
795	-62.4476	-56.2911		-61.9973	-60.7581
796	-62.5133	-56.2944		-61.9644	-60.7975
797	-62.4476	-56.4061		-61.9479	-60.7712
798	-62.5199	-56.3174		-61.8954	-60.8435
799	-62.5002	-56.37		-61.9545	-60.8928
800	-62.5856	-56.4193		-62.0729	-60.9093
801	-62.5593	-56.4817		-62.063	-60.9717
802	-62.6152	-56.4554		-62.0038	-61.0309
803	-62.6053	-56.4521		-62.1287	-61.0013
804	-62.6382	-56.3963		-62.0597	-60.975
805	-62.7105	-56.3963		-62.1682	-60.9651
806	-62.727	-56.5014		-62.1517	-61.0046
807	-62.7072	-56.5573		-62.1649	-61.021
808	-62.6777	-56.5639		-62.2339	-60.9816
809	-62.6711	-56.6658		-62.2832	-61.0638
810	-62.704	-56.6724		-62.2668	-61.0703
811	-62.727	-56.7743		-62.3128	-60.9816
812	-62.6908	-56.7677		-62.2964	-61.0473
813	-62.7302	-56.8367		-62.2865	-61.0999
814	-62.7105	-56.9353		-62.2273	-61.0079
815	-62.6711	-56.9518		-62.2208	-60.9947
816	-62.6185	-56.9912		-62.2109	-61.1065
817	-62.704	-56.9682		-62.1945	-61.1492
818	-62.6777	-56.9518		-62.2043	-61.1032
819	-62.7204	-56.9945		-62.2504	-61.1919
820	-62.6612	-57.08		-62.2438	-61.1459
821	-62.7007	-57.0438		-62.2438	-61.1591
822	-62.7828	-57.1161		-62.1978	-61.1394
823	-62.7171	-57.1687		-62.2208	-61.1952
824	-62.6777	-57.1851		-62.2438	-61.1361
825	-62.7105	-57.2081		-62.2043	-61.0407
826	-62.7697	-57.287		-62.3259	-61.0046
827	-62.7631	-57.3528		-62.2997	-60.9651
828	-62.7565	-57.3791		-62.2438	-60.998
829	-62.8486	-57.5073		-62.3227	-60.9651
830	-62.8157	-57.5105		-62.1912	-60.9093
831	-62.8026	-57.5204		-62.178	-60.86
832	-62.8091	-57.5138		-62.1649	-60.8534
833	-62.8289	-57.5631		-62.1813	-60.8041
834	-62.7861	-57.5664		-62.1649	-60.7975
835	-62.796	-57.4875		-62.2109	-60.7778
836	-62.727	-57.5237		-62.2306	-60.8107
837	-62.6448	-57.6157		-62.2766	-60.8402
838	-62.6875	-57.5894		-62.2405	-60.7646
839	-62.6809	-57.7143		-62.1649	-60.7416
840	-62.7072	-57.7143		-62.201	-60.7679
841	-62.6842	-57.6617		-62.2438	-60.8534
842	-62.6546	-57.7373		-62.2997	-60.7877
843	-62.6612	-57.7571		-62.201	-60.906
844	-62.7072	-57.8425		-62.2372	-60.8632
845	-62.6678	-57.8951		-62.2273	-60.8139
846	-62.6678	-57.813		-62.178	-60.7811
847	-62.7204	-57.7768		-62.0991	-60.8271
848	-62.7401	-57.9181		-62.1353	-60.7745
849	-62.7796	-57.7801		-62.1583	-60.7745
850	-62.7631	-57.8228		-62.1024	-60.6989
851	-62.7763	-57.8064		-62.0893	-60.7351
852	-62.704	-57.7571		-62.132	-60.6989
853	-62.7763	-57.7801		-62.1879	-60.7351
854	-62.6777	-57.8228		-62.2109	-60.7186
855	-62.7763	-57.8327		-62.1813	-60.7055
856	-62.8026	-57.8327		-62.0926	-60.6956
857	-62.7664	-57.8754		-62.0466	-60.7055
858	-62.6941	-57.8458		-62.0893	-60.666
859	-62.7796	-57.8787		-62.0433	-60.7318
860	-62.7631	-57.9313		-62.0893	-60.7186
861	-62.6974	-57.8984		-62.1485	-60.6989
862	-62.7105	-57.905		-62.1748	-60.7022
863	-62.6711	-57.9839		-62.2339	-60.7745
864	-62.6514	-57.9116		-62.2142	-60.7614
865	-62.6875	-57.9609		-62.1813	-60.8205
866	-62.6349	-57.9116		-62.1649	-60.7909
867	-62.6612	-57.8524		-62.1748	-60.7153
868	-62.5856	-57.8655		-62.1222	-60.7877
869	-62.6316	-57.8524		-62.1912	-60.7482
870	-62.6316	-57.9214		-62.1156	-60.7153
871	-62.5889	-57.8918		-62.1452	-60.6858
872	-62.5856	-57.9411		-62.0334	-60.6825
873	-62.6185	-57.8984		-62.0959	-60.6134
874	-62.5593	-57.8918		-62.0893	-60.6858
875	-62.5955	-57.997		-62.1254	-60.6792
876	-62.6612	-58.0167		-62.0729	-60.6858
877	-62.5856	-57.9806		-62.155	-60.6266
878	-62.5429	-57.974		-62.1123	-60.7088
879	-62.5429	-58.0069		-62.0663	-60.7811
880	-62.5758	-57.951		-62.1057	-60.7383
881	-62.5232	-58.02		-62.109	-60.7252
882	-62.5593	-57.9411		-62.0959	-60.6529
883	-62.5988	-57.9116		-62.0893	-60.7712
884	-62.5067	-58.0266		-62.1189	-60.7942
885	-62.5297	-57.997		-62.1222	-60.952
886	-62.5363	-57.9872		-62.1879	-60.929
887	-62.4936	-57.8721		-62.1485	-60.975
888	-62.5067	-57.8162		-62.1583	-60.9651
889	-62.5429	-57.8622		-62.0959	-61.0046
890	-62.5232	-57.9083		-62.132	-61.0407
891	-62.51	-57.8622		-62.0729	-61.044
892	-62.5889	-57.8688		-62.0367	-61.0473
893	-62.5725	-57.8787		-62.0991	-61.0736
894	-62.556	-57.8655		-62.1254	-61.1032
895	-62.5856	-57.8853		-62.1748	-61.1426
896	-62.5462	-57.882		-62.1978	-61.067
897	-62.556	-57.8458		-62.1024	-61.1131
898	-62.5626	-57.836		-62.2175	-61.1492
899	-62.5593	-57.8425		-62.2109	-61.1492
900	-62.4837	-57.836		-62.2372	-61.2051
901	-62.5495	-57.7373		-62.1485	-61.353
902	-62.5593	-57.7801		-62.1748	-61.2807
903	-62.6086	-57.8294		-62.1485	-61.3596
904	-62.5528	-57.7373		-62.1386	-61.2478
905	-62.7138	-57.8524		-62.1189	-61.3366
906	-62.6349	-57.882		-62.1649	-61.3234
907	-62.6514	-57.8885		-62.1879	-61.3004
908	-62.6612	-57.8951		-62.1846	-61.3333
909	-62.6744	-57.8853		-62.1846	-61.3859
910	-62.6645	-57.8392		-62.2832	-61.4615
911	-62.6777	-57.951		-62.2964	-61.4911
912	-62.7533	-57.8951		-62.2898	-61.422
913	-62.7796	-57.882		-62.2964	-61.5009
914	-62.7237	-57.9116		-62.2734	-61.4516
915	-62.8059	-57.8228		-62.2569	-61.4648
916	-62.8157	-57.8721		-62.2273	-61.5206
917	-62.8946	-57.8425		-62.1879	-61.4582
918	-62.9176	-57.8294		-62.1287	-61.4582
919	-62.8486	-57.7801		-62.1222	-61.4483
920	-62.8617	-57.8458		-62.0926	-61.5009
921	-62.9472	-57.8294		-62.0991	-61.4812
922	-62.9899	-57.9313		-62.1978	-61.4418
923	-63.0162	-57.8655		-62.1386	-61.4253
924	-62.9965	-57.8294		-62.1386	-61.4779
925	-63.0261	-57.8655		-62.109	-61.5239
926	-63.0162	-57.836		-62.1616	-61.5568
927	-63.1345	-57.813		-62.1517	-61.5239
928	-62.9998	-57.8655		-62.2076	-61.5601
929	-62.9866	-57.8228		-62.201	-61.5206
930	-63.0294	-57.7768		-62.2241	-61.5502
931	-63.0359	-57.8195		-62.2536	-61.5239
932	-63.1148	-57.7867		-62.2865	-61.5765
933	-63.1148	-57.9116		-62.3621	-61.5371
934	-63.105	-57.8787		-62.3457	-61.4812
935	-63.0754	-57.905		-62.3555	-61.5897
936	-63.0195	-57.9017		-62.3785	-61.5305
937	-63.0622	-57.9576		-62.4443	-61.5305
938	-63.1247	-57.7867		-62.3917	-61.593
939	-63.105	-57.8228		-62.4804	-61.593
940	-63.1115	-57.8425		-62.441	-61.5601
941	-63.1115	-57.8491		-62.4936	-61.6357
942	-63.1181	-57.9116		-62.4903	-61.7014
943	-63.0589	-57.8754		-62.5166	-61.6653
944	-63.1017	-57.859		-62.5988	-61.5995
945	-63.105	-57.9116		-62.6283	-61.5469
946	-63.0589	-57.9576		-62.6283	-61.4878
947	-63.0162	-58.0102		-62.5955	-61.5108
948	-63.0557	-58.0923		-62.6021	-61.4943
949	-63.128	-58.0628		-62.6579	-61.5765
950	-63.2266	-58.0759		-62.6612	-61.5206
951	-63.1806	-58.2041		-62.6546	-61.4516
952	-63.2036	-58.0923		-62.6809	-61.4648
953	-63.0984	-58.0693		-62.7467	-61.5009
954	-63.0688	-58.0496		-62.6777	-61.4648
955	-63.0984	-58.0233		-62.6514	-61.5108
956	-63.0031	-58.0792		-62.7138	-61.5568
957	-63.0524	-58.1614		-62.7697	-61.5667
958	-63.0326	-58.1088		-62.7368	-61.6291
959	-63.0918	-58.0825		-62.7434	-61.6883
960	-63.1115	-58.1186		-62.7533	-61.6455
961	-63.0425	-58.1548		-62.8486	-61.5667
962	-63.0754	-58.1318		-62.8486	-61.5437
963	-62.9768	-58.043		-62.8979	-61.5962
964	-62.9571	-58.0365		-62.8946	-61.5732
965	-62.9702	-58.0299		-62.8913	-61.5699
966	-62.9571	-58.0299		-62.934	-61.5765
967	-62.9801	-57.974		-62.9209	-61.6718
968	-62.9439	-57.974		-62.9077	-61.6193
969	-62.9242	-58.02		-62.9275	-61.6258
970	-63.0195	-58.0069		-62.9176	-61.6455
971	-63.0031	-57.9313		-62.9308	-61.7047
972	-63.1017	-57.997		-62.9768	-61.6784
973	-63.0754	-57.9641		-62.9505	-61.8296
974	-63.1641	-57.9609		-62.934	-61.8132
975	-63.1477	-57.8721		-62.9143	-61.6883
976	-63.1937	-57.9609		-63.0458	-61.7967
977	-63.0951	-57.951		-63.0392	-61.7869
978	-63.1707	-57.8787		-62.9899	-61.7935
979	-63.2299	-57.882		-63.1214	-61.7474
980	-63.2792	-57.8787		-63.1576	-61.685
981	-63.3153	-57.8853		-63.1017	-61.7409
982	-63.289	-57.8754		-63.1641	-61.6784
983	-63.3022	-57.7867		-63.1641	-61.708
984	-63.4304	-57.8655		-63.2167	-61.7014
985	-63.4106	-57.8064		-63.2857	-61.616
986	-63.4534	-57.8294		-63.2693	-61.6455
987	-63.4172	-57.8754		-63.2332	-61.5437
988	-63.4632	-57.8622		-63.2627	-61.5601
989	-63.4468	-57.7998		-63.2036	-61.5338
990	-63.5125	-57.7965		-63.1839	-61.5009
991	-63.552	-57.8064		-63.2233	-61.4976
992	-63.5125	-57.8162		-63.2299	-61.3431
993	-63.5356	-57.859		-63.2003	-61.3267
994	-63.6144	-57.7636		-63.2167	-61.215
995	-63.552	-57.7209		-63.2463	-61.215
996	-63.5619	-57.7143		-63.22	-61.1689
997	-63.5914	-57.7538		-63.1674	-61.1492
998	-63.6407	-57.7702		-63.1904	-61.1591
999	-63.6309	-57.8031		-63.197	-61.067
1000	-63.6473	-57.7308		-63.2003	-61.021
1001	-63.644	-57.7538		-63.174	-61.0177
1002	-63.6506	-57.7242		-63.1082	-60.9224
1003	-63.6112	-57.7932		-63.1641	-60.952
1004	-63.6407	-57.7472		-63.1477	-60.8238
1005	-63.5651	-57.7998		-63.1806	-60.8205
1006	-63.529	-57.8228		-63.0754	-60.7877
1007	-63.4928	-57.7899		-63.0524	-60.8074
1008	-63.529	-57.8425		-63.105	-60.7778
1009	-63.5487	-57.882		-63.0852	-60.7219
1010	-63.552	-57.9247		-62.9932	-60.6397
1011	-63.6309	-57.8951		-63.0557	-60.6365
1012	-63.6638	-57.9543		-62.9801	-60.5641
1013	-63.621	-57.9148		-63.0096	-60.6463
1014	-63.6572	-57.9773		-63.0326	-60.5806
1015	-63.6407	-58.0397		-63.0096	-60.4491
1016	-63.6736	-58.0858		-62.9505	-60.4425
1017	-63.5947	-58.0858		-63.0458	-60.3571
1018	-63.5849	-58.1219		-62.9932	-60.3045
1019	-63.6736	-58.0496		-63.0064	-60.2913
1020	-63.6046	-58.1153		-62.9472	-60.3406
1021	-63.6933	-58.1614		-63.0392	-60.2815
1022	-63.7098	-58.1153		-63.105	-60.2322
1023	-63.621	-58.2008		-62.934	-60.1697
1024	-63.598	-58.2633		-63.0326	-60.1303
1025	-63.552	-58.237		-63.0359	-60.0941
1026	-63.5323	-58.2731		-62.9373	-60.0152
1027	-63.4402	-58.2665		-62.9571	-60.0054
1028	-63.3712	-58.2665		-62.9373	-59.91
1029	-63.4764	-58.3224		-62.9735	-59.91
1030	-63.4172	-58.3356		-63.0392	-59.9002
1031	-63.3909	-58.3619		-62.9866	-59.864
1032	-63.3679	-58.3093		-62.9603	-59.9363
1033	-63.3679	-58.3882		-63.0557	-59.8114
1034	-63.3088	-58.4276		-63.0392	-59.8279
1035	-63.3186	-58.3652		-63.0951	-59.7753
1036	-63.2759	-58.4145		-63.0294	-59.7424
1037	-63.243	-58.4736		-63.0129	-59.7917
1038	-63.2167	-58.4638		-63.0326	-59.7818
1039	-63.1444	-58.4638		-63.0524	-59.7621
1040	-63.0951	-58.4934		-63.1313	-59.749
1041	-63.0425	-58.5032		-63.0655	-59.726
1042	-62.9308	-58.5196		-63.1148	-59.7358
1043	-62.9077	-58.6018		-63.1214	-59.7227
1044	-62.8519	-58.5887		-63.082	-59.7588
1045	-62.8091	-58.6577		-63.1017	-59.7227
1046	-62.7894	-58.6643		-63.1543	-59.7818
1047	-62.6514	-58.6708		-63.1576	-59.8246
1048	-62.7105	-58.6577		-63.1247	-59.8081
1049	-62.6053	-58.6873		-63.1674	-59.818
1050	-62.5955	-58.6873		-63.0524	-59.8246
1051	-62.6349	-58.6511		-63.0557	-59.7753
1052	-62.5889	-58.7103		-63.0162	-59.8048
1053	-62.6053	-58.7432		-63.0425	-59.9363
1054	-62.5988	-58.7563		-63.0524	-59.8936
1055	-62.5166	-58.753		-63.0228	-59.9002
1056	-62.4607	-58.7464		-63.0392	-59.8772
1057	-62.4903	-58.7694		-62.9932	-59.91
1058	-62.4903	-58.7793		-62.9833	-59.9035
1059	-62.4607	-58.8122		-63.0359	-59.8936
1060	-62.4772	-58.7727		-63.0261	-59.8509
1061	-62.4344	-58.7826		-63.1082	-59.9758
1062	-62.5133	-58.7859		-63.0557	-59.8936
1063	-62.5495	-58.7399		-63.0589	-59.9133
1064	-62.5265	-58.6873		-63.0326	-59.9133
1065	-62.579	-58.6708		-63.0688	-59.8541
1066	-62.6053	-58.6971		-63.0918	-60.0021
1067	-62.5692	-58.615		-63.151	-60.0054
1068	-62.5232	-58.5854		-63.1148	-60.127
1069	-62.5626	-58.5131		-63.0918	-60.1368
1070	-62.4377	-58.5098		-63.0064	-60.1401
1071	-62.487	-58.4966		-63.0228	-60.1138
1072	-62.464	-58.5427		-62.9571	-60.1697
1073	-62.4114	-58.4769		-62.9833	-60.1368
1074	-62.418	-58.4342		-62.9538	-60.1368
1075	-62.4344	-58.4145		-63.0228	-60.104
1076	-62.5232	-58.4243		-63.1148	-60.1204
1077	-62.5495	-58.306		-63.1444	-60.1697
1078	-62.5725	-58.3454		-63.1839	-60.1434
1079	-62.5462	-58.3717		-63.1247	-60.2486
1080	-62.533	-58.3947		-63.0622	-60.196
1081	-62.5659	-58.3783		-63.0918	-60.2354
1082	-62.5528	-58.3816		-63.0918	-60.2223
1083	-62.5363	-58.4079		-63.0984	-60.3012
1084	-62.6152	-58.4934		-63.0557	-60.2552
1085	-62.5758	-58.4934		-63.0359	-60.2387
1086	-62.6546	-58.4736		-63.0557	-60.1796
1087	-62.5856	-58.5098		-63.0294	-60.3045
1088	-62.5067	-58.5328		-62.9373	-60.2683
1089	-62.5725	-58.5427		-62.9439	-60.1796
1090	-62.5528	-58.4703		-62.8453	-60.1993
1091	-62.556	-58.4901		-62.8157	-60.196
1092	-62.5856	-58.6314		-62.7565	-60.1894
1093	-62.6021	-58.6873		-62.7335	-60.2059
1094	-62.5725	-58.6807		-62.7237	-60.1138
1095	-62.5232	-58.6544		-62.7204	-60.0941
1096	-62.5626	-58.7563		-62.7565	-60.0579
1097	-62.5199	-58.7103		-62.7598	-60.0284
1098	-62.5988	-58.7103		-62.6546	-60.0908
1099	-62.4936	-58.707		-62.6678	-60.0349
1100	-62.6316	-58.7793		-62.5889	-60.0382
1101	-62.5988	-58.7333		-62.5626	-59.9725
1102	-62.5363	-58.7563		-62.6415	-60.0711
1103	-62.5593	-58.7957		-62.6053	-60.0645
1104	-62.5823	-58.7333		-62.6021	-60.1237
1105	-62.5199	-58.7234		-62.5823	-60.1072
1106	-62.6316	-58.7267		-62.579	-60.1171
1107	-62.4804	-58.799		-62.487	-60.0349
1108	-62.372	-58.4769		-62.3884	-59.9889
1109	-62.3391	-59.0291		-62.3029	-60.0349
1110	-62.4574	-58.6051		-62.5856	-60.0711
1111	-62.6251	-58.8582		-62.5889	-60.0941
1112	-62.556	-58.5558		-62.4837	-60.0481
1113	-62.6185	-58.638		-62.4739	-60.1007
1114	-62.6415	-58.7333		-62.5265	-60.1401
1115	-62.6382	-58.707		-62.487	-60.1434
1116	-62.6678	-58.8056		-62.4969	-60.2716
1117	-62.75	-58.7727		-62.5363	-60.2552
1118	-62.7302	-58.8023		-62.4574	-60.2749
1119	-62.6908	-58.7169		-62.5725	-60.2322
1120	-62.7631	-58.7957		-62.5955	-60.3045
1121	-62.6678	-58.8615		-62.6974	-60.2847
1122	-62.7631	-58.9009		-62.7007	-60.334
1123	-62.6777	-58.8549		-62.6678	-60.3505
1124	-62.7138	-58.8089		-62.7237	-60.1533
1125	-62.7105	-58.8779		-62.7565	-60.3834
1126	-62.6809	-58.9075		-62.7204	-60.5411
1127	-62.7007	-58.8878		-62.7434	-60.7778
1128	-62.7171	-58.8878		-62.7007	-60.334
1129	-62.6086	-58.8681		-62.6941	-60.4754
1130	-62.6481	-58.9338		-62.7335	-60.5411
1131	-62.5396	-58.8714		-62.7401	-60.5444
1132	-62.5626	-58.9075		-62.8157	-60.4655
1133	-62.5626	-58.8286		-62.8321	-60.482
1134	-62.579	-58.8549		-62.7993	-60.482
1135	-62.579	-58.7859		-62.8617	-60.4491
1136	-62.6283	-58.8648		-62.9308	-60.3669
1137	-62.4706	-58.7694		-62.9143	-60.3373
1138	-62.6382	-58.7826		-62.9176	-60.3505
1139	-62.5823	-58.822		-62.8387	-60.4031
1140	-62.5528	-58.7267		-62.8354	-60.2946
1141	-62.5823	-58.7136		-62.8913	-60.2782
1142	-62.4837	-58.7563		-62.911	-60.242
1143	-62.5067	-58.7267		-62.8814	-60.2519
1144	-62.51	-58.7892		-62.8979	-60.2584
1145	-62.4969	-58.73		-62.9669	-60.1533
1146	-62.5067	-58.7563		-62.8289	-60.173
1147	-62.51	-58.6741		-62.8847	-60.0875
1148	-62.5429	-58.7333		-62.9866	-60.0218
1149	-62.5297	-58.6906		-62.9603	-60.0185
1150	-62.4509	-58.7432		-62.9636	-60.0185
1151	-62.4377	-58.7267		-63.0326	-59.9659
1152	-62.4081	-58.7333		-63.0688	-59.9955
1153	-62.372	-58.7103		-62.9899	-59.9626
1154	-62.2832	-58.753		-63.0491	-59.9528
1155	-62.2339	-58.7103		-63.0096	-59.91
1156	-62.178	-58.6643		-63.0261	-59.8574
1157	-62.201	-58.753		-63.0031	-59.933
1158	-62.2142	-58.7432		-63.0491	-59.8903
1159	-62.2273	-58.7727		-63.0425	-59.933
1160	-62.1945	-58.7662		-63.0031	-59.9199
1161	-62.2109	-58.7399		-63.0031	-59.933
1162	-62.2241	-58.7432		-62.9768	-59.8476
1163	-62.2372	-58.7136		-62.9866	-59.9429
1164	-62.2208	-58.7497		-62.9472	-59.9528
1165	-62.2569	-58.6051		-62.9866	-59.8804
1166	-62.1846	-58.5525		-62.9439	-59.7983
1167	-62.2241	-58.6413		-63.0359	-59.8476
1168	-62.2175	-58.6873		-63.0688	-59.9002
1169	-62.2832	-58.7267		-63.0885	-59.8541
1170	-62.2766	-58.707		-62.9801	-59.9495
1171	-62.2504	-58.73		-63.0458	-59.7654
1172	-62.1682	-58.7399		-63.0491	-59.7785
1173	-62.0991	-58.6676		-63.0787	-59.8048
1174	-62.1748	-58.7267		-63.0195	-59.7917
1175	-62.1353	-58.661		-63.0589	-59.7424
1176	-62.0498	-58.6478		-62.9998	-59.7062
1177	-62.0005	-58.6445		-63.0031	-59.6931
1178	-62.0104	-58.5361		-63.0491	-59.703
1179	-62.0301	-58.5722		-63.0524	-59.6175
1180	-61.9907	-58.5985		-63.1148	-59.6767
1181	-61.9841	-58.661		-63.2266	-59.6405
1182	-62.0334	-58.5887		-63.1115	-59.6274
1183	-61.9447	-58.6347		-63.174	-59.6471
1184	-61.8921	-58.5887		-63.1576	-59.6898
1185	-61.8329	-58.569		-63.1543	-59.6142
1186	-61.8362	-58.5887		-63.2101	-59.7095
1187	-61.8066	-58.6248		-63.2332	-59.7555
1188	-61.7803	-58.6708		-63.243	-59.6931
1189	-61.823	-58.7464		-63.3055	-59.7292
1190	-61.7179	-58.753		-63.2496	-59.6799
1191	-61.7047	-58.6643		-63.2529	-59.726
1192	-61.754	-58.5854		-63.2923	-59.6767
1193	-61.7047	-58.707		-63.3153	-59.6011
1194	-61.6258	-58.7793		-63.3449	-59.6241
1195	-61.5535	-58.7037		-63.2496	-59.4762
1196	-61.5732	-58.776		-63.2627	-59.5123
1197	-61.5732	-58.7366		-63.2529	-59.4301
1198	-61.6455	-58.7892		-63.2167	-59.4367
1199	-61.5108	-58.7563		-63.2759	-59.3874
1200	-61.4681	-58.8253		-63.2233	-59.2625
1201	-61.5404	-58.8023		-63.289	-59.2625
1202	-61.5239	-58.8023		-63.3318	-59.2888
1203	-61.5502	-58.8746		-63.3351	-59.2954
1204	-61.4845	-58.8681		-63.2693	-59.2987
1205	-61.399	-58.8681		-63.2759	-59.1803
1206	-61.4418	-58.8878		-63.3153	-59.1836
1207	-61.3497	-58.8779		-63.2792	-59.1672
1208	-61.3563	-58.9108		-63.2956	-59.154
1209	-61.4188	-58.8845		-63.2266	-59.1606
1210	-61.3826	-58.9075		-63.3285	-59.1442
1211	-61.4056	-58.8746		-63.3449	-59.1705
1212	-61.5305	-58.9141		-63.3712	-59.1212
1213	-61.4615	-58.9338		-63.3909	-59.1376
1214	-61.4878	-59.0784		-63.3515	-59.0521
1215	-61.4056	-59.0456		-63.3844	-59.1212
1216	-61.4385	-59.062		-63.3515	-59.0521
1217	-61.4878	-59.0554		-63.3383	-59.0324
1218	-61.5338	-59.0127		-63.3745	-59.062
1219	-61.5667	-59.0193		-63.3909	-59.062
1220	-61.6718	-58.9404		-63.3318	-59.0883
1221	-61.5864	-58.9469		-63.2594	-59.085
1222	-61.5404	-58.9174		-63.2101	-59.0488
1223	-61.5634	-58.9141		-63.266	-59.062
1224	-61.6521	-58.8779		-63.289	-59.0521
1225	-61.6061	-58.8911		-63.2857	-59.0751
1226	-61.5995	-58.8779		-63.3022	-59.0587
1227	-61.5667	-58.8516		-63.266	-59.0718
1228	-61.6094	-58.9174		-63.2956	-59.0587
1229	-61.6357	-58.9075		-63.2825	-59.0094
1230	-61.6193	-58.9798		-63.2726	-59.0981
1231	-61.5798	-58.9174		-63.2332	-59.0653
1232	-61.5831	-58.9601		-63.1937	-59.1606
1233	-61.6423	-59.0423		-63.2562	-59.1672
1234	-61.6883	-58.9404		-63.2759	-59.1836
1235	-61.5962	-58.9831		-63.1937	-59.3052
1236	-61.6127	-58.8779		-63.1871	-59.2756
1237	-61.5568	-58.8746		-63.2463	-59.2756
1238	-61.5437	-58.8352		-63.1247	-59.2099
1239	-61.6193	-58.8845		-63.0852	-59.2494
1240	-61.4943	-58.8681		-63.0754	-59.2296
1241	-61.6061	-58.8582		-63.0885	-59.2296
1242	-61.4779	-58.8352		-63.0557	-59.1869
1243	-61.4911	-58.8418		-62.9899	-59.177
1244	-61.5338	-58.8582		-62.8979	-59.1836
1245	-61.4911	-58.8056		-62.9571	-59.2855
1246	-61.5667	-58.7694		-62.888	-59.2526
1247	-61.5732	-58.8418		-62.8157	-59.2
1248	-61.5995	-58.7432		-62.8256	-59.2329
1249	-61.6127	-58.7136		-62.8519	-59.2921
1250	-61.6554	-58.7333		-62.7697	-59.2822
1251	-61.6784	-58.7694		-62.704	-59.2822
1252	-61.6587	-58.7793		-62.6283	-59.3545
1253	-61.7277	-58.6741		-62.5988	-59.3315
1254	-61.7146	-58.7267		-62.6086	-59.3578
1255	-61.7902	-58.6807		-62.5889	-59.2658
1256	-61.8	-58.6939		-62.6086	-59.3184
1257	-61.9611	-58.7629		-62.6809	-59.3085
1258	-61.9447	-58.7662		-62.6382	-59.3973
1259	-61.9217	-58.8385		-62.6448	-59.4334
1260	-61.9184	-58.8155		-62.5626	-59.3874
1261	-61.9184	-58.8812		-62.6481	-59.4794
1262	-62.0203	-58.8418		-62.5758	-59.463
1263	-62.0367	-58.8253		-62.5626	-59.4729
1264	-62.0071	-58.8714		-62.5823	-59.4926
1265	-62.0991	-58.9174		-62.5297	-59.5156
1266	-62.0959	-58.9141		-62.4607	-59.555
1267	-62.2043	-58.8385		-62.4377	-59.4762
1268	-62.2142	-58.8911		-62.4837	-59.5156
1269	-62.178	-58.9634		-62.4772	-59.5517
1270	-62.1682	-58.9141		-62.4673	-59.5024
1271	-62.2471	-58.9864		-62.4772	-59.5485
1272	-62.2109	-58.9798		-62.4607	-59.5715
1273	-62.2306	-58.9568		-62.4804	-59.6043
1274	-62.1485	-58.9765		-62.4706	-59.6109
1275	-62.1189	-59.0291		-62.5988	-59.6734
1276	-62.155	-59.0094		-62.5988	-59.6274
1277	-62.1156	-59.0817		-62.5265	-59.5715
1278	-62.2569	-59.062		-62.6053	-59.6339
1279	-62.1978	-59.1212		-62.533	-59.6043
1280	-62.3391	-59.1639		-62.5659	-59.6405
1281	-62.3457	-59.2099		-62.5265	-59.6142
1282	-62.3851	-59.1836		-62.5396	-59.7194
1283	-62.3128	-59.2263		-62.5297	-59.6274
1284	-62.4278	-59.2461		-62.5199	-59.6767
1285	-62.4574	-59.2724		-62.4443	-59.7161
1286	-62.441	-59.2658		-62.4936	-59.7128
1287	-62.4903	-59.3151		-62.51	-59.6602
1288	-62.4903	-59.4005		-62.5725	-59.6372
1289	-62.4804	-59.4531		-62.6415	-59.6142
1290	-62.4739	-59.3907		-62.6809	-59.6438
1291	-62.4706	-59.4499		-62.6086	-59.6767
1292	-62.4048	-59.4926		-62.6744	-59.6306
1293	-62.4048	-59.4334		-62.6546	-59.5846
1294	-62.4081	-59.4005		-62.6481	-59.6142
1295	-62.4804	-59.4203		-62.4903	-59.5846
1296	-62.4804	-59.3677		-62.5495	-59.6734
1297	-62.4772	-59.3118		-62.5856	-59.6701
1298	-62.441	-59.371		-62.6152	-59.7687
1299	-62.5725	-59.3019		-62.6678	-59.7851
1300	-62.5988	-59.3217		-62.6349	-59.8279
1301	-62.5889	-59.4334		-62.5955	-59.8344
1302	-62.5922	-59.2855		-62.6875	-59.7621
1303	-62.5659	-59.3447		-62.6908	-59.6832
1304	-62.5692	-59.3611		-62.6645	-59.726
1305	-62.6514	-59.3315		-62.6119	-59.7818
1306	-62.6448	-59.2921		-62.6349	-59.8114
1307	-62.7072	-59.2987		-62.7467	-59.8541
1308	-62.7237	-59.2724		-62.7204	-59.7687
1309	-62.6711	-59.2428		-62.7302	-59.6865
1310	-62.7072	-59.2033		-62.7828	-59.7555
1311	-62.7007	-59.1738		-62.7368	-59.7621
1312	-62.7007	-59.2		-62.8354	-59.7523
1313	-62.7072	-59.0127		-62.8946	-59.749
1314	-62.6579	-58.9831		-62.9176	-59.8541
1315	-62.5495	-58.9469		-62.8782	-59.8279
1316	-62.6152	-58.9667		-62.911	-59.8607
1317	-62.5166	-58.9305		-62.9012	-59.933
1318	-62.4772	-58.8582		-62.865	-59.9593
1319	-62.4772	-58.8714		-62.8387	-59.9035
1320	-62.4081	-58.7892		-62.8223	-59.9791
1321	-62.441	-58.707		-62.8387	-59.9758
1322	-62.418	-58.6873		-62.865	-59.9856
1323	-62.4344	-58.661		-62.7861	-59.9922
1324	-62.3292	-58.6314		-62.7105	-59.9791
1325	-62.3654	-58.6314		-62.8059	-59.9692
1326	-62.4377	-58.5657		-62.8617	-60.0054
1327	-62.4278	-58.4309		-62.9077	-60.0349
1328	-62.372	-58.4276		-62.8289	-60.0678
1329	-62.2997	-58.4375		-62.8519	-60.1927
1330	-62.2898	-58.375		-62.7763	-60.1993
1331	-62.2931	-58.3158		-62.7467	-60.1664
1332	-62.2964	-58.2928		-62.7467	-60.1828
1333	-62.2668	-58.2961		-62.7697	-60.219
1334	-62.2569	-58.2304		-62.7401	-60.2387
1335	-62.2372	-58.2205		-62.8157	-60.2815
1336	-62.3292	-58.2534		-62.7861	-60.3045
1337	-62.3983	-58.2008		-62.7434	-60.3242
1338	-62.3457	-58.1679		-62.7533	-60.3078
1339	-62.4016	-58.1844		-62.6875	-60.3636
1340	-62.3654	-58.1614		-62.6809	-60.2683
1341	-62.3851	-58.2468		-62.6086	-60.3439
1342	-62.3687	-58.2863		-62.7105	-60.2782
1343	-62.3851	-58.2172		-62.6415	-60.3045
1344	-62.441	-58.1318		-62.579	-60.2913
1345	-62.4673	-58.066		-62.6514	-60.3439
1346	-62.4509	-58.0233		-62.7072	-60.3308
1347	-62.372	-57.9247		-62.7138	-60.2716
1348	-62.3457	-57.997		-62.7533	-60.1894
1349	-62.2668	-57.9346		-62.7171	-60.196
1350	-62.2964	-58.0167		-62.6875	-60.265
1351	-62.3687	-58.0726		-62.6448	-60.2782
1352	-62.3227	-57.9937		-62.7434	-60.2683
1353	-62.3062	-58.0332		-62.6842	-60.2552
1354	-62.2766	-58.0463		-62.7007	-60.3242
1355	-62.2832	-58.2205		-62.7598	-60.265
1356	-62.2602	-58.1778		-62.7796	-60.3472
1357	-62.3292	-58.1909		-62.7763	-60.2486
1358	-62.3029	-58.1909		-62.8124	-60.2059
1359	-62.3753	-58.1712		-62.8059	-60.2683
1360	-62.4016	-58.2205		-62.7763	-60.2782
1361	-62.418	-58.26		-62.8749	-60.2387
1362	-62.4969	-58.3093		-62.888	-60.1467
1363	-62.4377	-58.3093		-62.9275	-60.173
1364	-62.4443	-58.3257		-62.9603	-60.2157
1365	-62.464	-58.3652		-62.9571	-60.0974
1366	-62.4476	-58.4868		-62.9603	-60.0842
1367	-62.4837	-58.5131		-63.0294	-60.0875
1368	-62.3753	-58.6051		-62.9866	-60.0349
1369	-62.441	-58.6445		-63.0491	-60.0415
1370	-62.4969	-58.6215		-63.0688	-60.0382
1371	-62.5002	-58.7333		-63.0622	-59.9955
1372	-62.5462	-58.6413		-63.1313	-59.9692
1373	-62.5396	-58.661		-63.22	-59.9363
1374	-62.4772	-58.6511		-63.2134	-59.8804
1375	-62.487	-58.6643		-63.1806	-59.8443
1376	-62.4739	-58.6741		-63.2266	-59.7424
1377	-62.4509	-58.6413		-63.2726	-59.6767
1378	-62.4903	-58.6807		-63.2857	-59.6438
1379	-62.51	-58.6478		-63.2496	-59.6471
1380	-62.51	-58.6676		-63.2562	-59.578
1381	-62.5528	-58.6676		-63.2825	-59.5517
1382	-62.6021	-58.6939		-63.3811	-59.5682
1383	-62.6021	-58.6741		-63.3876	-59.5813
1384	-62.6251	-58.6577		-63.4501	-59.4696
1385	-62.6086	-58.7169		-63.4468	-59.4729
1386	-62.6218	-58.7037		-63.5323	-59.4992
1387	-62.5889	-58.6544		-63.4961	-59.4794
1388	-62.5988	-58.661		-63.5093	-59.4137
1389	-62.6481	-58.6741		-63.6046	-59.3808
1390	-62.6809	-58.7497		-63.6144	-59.3578
1391	-62.7664	-58.6873		-63.5421	-59.3512
1392	-62.7434	-58.684		-63.6079	-59.348
1393	-62.8091	-58.753		-63.5125	-59.394
1394	-62.7697	-58.7267		-63.483	-59.3085
1395	-62.8486	-58.7136		-63.5586	-59.3052
1396	-62.9209	-58.661		-63.552	-59.1606
1397	-62.9012	-58.7267		-63.5191	-59.2198
1398	-62.8979	-58.7004		-63.5125	-59.2494
1399	-62.9077	-58.6511		-63.6243	-59.3019
1400	-62.9571	-58.661		-63.6243	-59.2494
1401	-62.8782	-58.5887		-63.4928	-59.3085
1402	-62.911	-58.6511		-63.5421	-59.3414
1403	-62.934	-58.6643		-63.6144	-59.2855
1404	-62.9538	-58.5985		-63.5816	-59.3545
1405	-62.8913	-58.6084		-63.6046	-59.348
1406	-62.9603	-58.6741		-63.5651	-59.3414
1407	-63.0031	-58.7103		-63.6703	-59.3743
1408	-63.105	-58.6939		-63.5947	-59.3644
1409	-63.0852	-58.6314		-63.5816	-59.3118
1410	-63.0261	-58.6281		-63.6703	-59.325
1411	-62.9702	-58.5887		-63.6966	-59.3217
1412	-63.0261	-58.5657		-63.69	-59.3348
1413	-62.9636	-58.5985		-63.6835	-59.3282
1414	-63.1411	-58.6939		-63.6342	-59.2362
1415	-63.0721	-58.6511		-63.6769	-59.3447
1416	-63.1181	-58.6314		-63.667	-59.3874
1417	-63.2562	-58.6873		-63.6802	-59.3282
1418	-63.1444	-58.73		-63.6375	-59.417
1419	-63.1904	-58.753		-63.5881	-59.3874
1420	-63.2562	-58.707		-63.6473	-59.3381
1421	-63.3613	-58.6676		-63.5849	-59.3775
1422	-63.3712	-58.6643		-63.5816	-59.3052
1423	-63.3515	-58.6413		-63.5816	-59.3019
1424	-63.3318	-58.5985		-63.5421	-59.3874
1425	-63.3909	-58.6051		-63.5257	-59.3841
1426	-63.3679	-58.661		-63.4764	-59.3151
1427	-63.3285	-58.7826		-63.5027	-59.3611
1428	-63.4468	-58.7662		-63.4074	-59.3874
1429	-63.4534	-58.7925		-63.4468	-59.3085
1430	-63.4402	-58.8286		-63.4501	-59.3184
1431	-63.552	-58.8812		-63.4172	-59.348
1432	-63.5257	-58.8352		-63.3646	-59.3217
1433	-63.5093	-58.9437		-63.3975	-59.3578
1434	-63.5454	-58.9437		-63.3811	-59.4499
1435	-63.6309	-58.9371		-63.3219	-59.4367
1436	-63.6276	-58.9798		-63.2594	-59.4597
1437	-63.6506	-58.9601		-63.1543	-59.3907
1438	-63.621	-59.0193		-63.1181	-59.4334
1439	-63.6112	-58.9469		-63.0425	-59.3907
1440	-63.6079	-58.9469		-63.0031	-59.3545
1441	-63.6506	-59.0291		-63.0622	-59.4236
1442	-63.6868	-58.9864		-62.9833	-59.3578
1443	-63.6407	-59.0751		-63.0392	-59.4203
1444	-63.6013	-59.0554		-63.0294	-59.3151
1445	-63.6309	-58.993		-62.9571	-59.3381
1446	-63.5684	-58.9437		-62.9505	-59.3052
1447	-63.6112	-58.9765		-62.9932	-59.3381
1448	-63.4797	-58.9634		-63.0031	-59.3907
1449	-63.5421	-58.9667		-63.0754	-59.3414
1450	-63.5388	-58.97		-62.9965	-59.3282
1451	-63.529	-59.0488		-63.0228	-59.2724
1452	-63.4928	-59.039		-63.0228	-59.2756
1453	-63.529	-59.0423		-63.0326	-59.2987
1454	-63.4994	-59.0587		-63.0852	-59.2395
1455	-63.4698	-59.0916		-63.1214	-59.2263
1456	-63.4731	-59.062		-63.2167	-59.2789
1457	-63.4435	-59.1507		-63.1773	-59.2526
1458	-63.3975	-59.1113		-63.174	-59.2526
1459	-63.4041	-59.1244		-63.1345	-59.3414
1460	-63.4534	-59.0949		-63.1543	-59.3808
1461	-63.4337	-59.0784		-63.1082	-59.3348
1462	-63.483	-59.085		-63.1115	-59.2855
1463	-63.4534	-59.1014		-63.0622	-59.4268
1464	-63.4369	-59.0521		-63.0359	-59.3775
1465	-63.3942	-59.1672		-63.0228	-59.3217
1466	-63.2857	-59.1573		-62.9965	-59.2954
1467	-63.3055	-59.1212		-62.9669	-59.371
1468	-63.266	-59.0916		-62.9242	-59.4071
1469	-63.3383	-59.0193		-62.9308	-59.4005
1470	-63.2792	-59.0061		-62.934	-59.394
1471	-63.3449	-59.0028		-62.8617	-59.4104
1472	-63.3186	-58.9864		-62.8946	-59.4334
1473	-63.2693	-58.9995		-62.9603	-59.4334
1474	-63.197	-58.9174		-62.9735	-59.371
1475	-63.151	-58.8451		-62.9702	-59.2691
1476	-63.1444	-58.7333		-62.9538	-59.3348
1477	-63.1411	-58.6807		-62.9932	-59.3348
1478	-63.0721	-58.6347		-63.0096	-59.2263
1479	-63.0129	-58.5722		-62.911	-59.2987
1480	-63.0392	-58.5657		-62.9866	-59.2263
1481	-62.9702	-58.4835		-63.0392	-59.1803
1482	-62.8979	-58.3849		-62.9176	-59.1376
1483	-62.888	-58.3914		-62.8946	-59.0817
1484	-62.8486	-58.3882		-62.9768	-59.0587
1485	-62.7828	-58.3126		-62.8749	-59.0949
1486	-62.7664	-58.2863		-62.9176	-59.0751
1487	-62.727	-58.2534		-62.8584	-59.0949
1488	-62.6645	-58.1778		-62.9209	-59.0193
1489	-62.6579	-58.2008		-62.9308	-59.0094
1490	-62.6119	-58.1745		-62.9275	-58.9831
1491	-62.5166	-58.1153		-62.9242	-58.97
1492	-62.5823	-58.043		-62.911	-58.9338
1493	-62.5528	-57.9707		-62.911	-58.8845
1494	-62.4837	-57.9181		-62.8716	-58.8122
1495	-62.4837	-57.7669		-62.8256	-58.7892
1496	-62.4081	-57.7965		-62.8321	-58.7432
1497	-62.3621	-57.6848		-62.796	-58.7859
1498	-62.3424	-57.6716		-62.7598	-58.7169
1499	-62.3391	-57.642		-62.7401	-58.7136
1500	-62.2931	-57.6815		-62.6809	-58.7563
1501	-62.2536	-57.5467		-62.6941	-58.6906
1502	-62.1813	-57.5336		-62.6514	-58.5591
1503	-62.178	-57.5401		-62.6316	-58.5558
1504	-62.0531	-57.5303		-62.5659	-58.5427
1505	-62.0367	-57.5303		-62.6021	-58.5131
1506	-62.0926	-57.4711		-62.5396	-58.5722
1507	-62.0071	-57.3889		-62.6744	-58.5755
1508	-62.0071	-57.287		-62.6382	-58.6018
1509	-61.9644	-57.31		-62.5758	-58.5657
1510	-61.8986	-57.2147		-62.6251	-58.5164
1511	-61.9414	-57.2114		-62.4673	-58.4243
1512	-61.8954	-57.2739		-62.4837	-58.4375
1513	-61.8165	-57.2739		-62.4443	-58.375
1514	-61.8329	-57.195		-62.5429	-58.5065
1515	-61.8691	-57.2936		-62.5955	-58.3783
1516	-61.8033	-57.3889		-62.6481	-58.3553
1517	-61.7935	-57.4119		-62.5988	-58.329
1518	-61.7737	-57.4087		-62.6218	-58.2665
1519	-61.7803	-57.4547		-62.6316	-58.1811
1520	-61.8789	-57.5105		-62.7237	-58.1844
1521	-61.823	-57.481		-62.7401	-58.0397
1522	-61.8625	-57.5105		-62.579	-58.066
1523	-61.9184	-57.4744		-62.7138	-57.9806
1524	-61.7967	-57.5599		-62.6777	-57.997
1525	-61.754	-57.5697		-62.6842	-57.8655
1526	-61.754	-57.5401		-62.7105	-57.8951
1527	-61.7244	-57.6585		-62.6842	-57.8294
1528	-61.7705	-57.5401		-62.6875	-57.813
1529	-61.8296	-57.5171		-62.6382	-57.7965
1530	-61.731	-57.5993		-62.5922	-57.7735
1531	-61.7343	-57.6059		-62.6218	-57.7406
1532	-61.7211	-57.6716		-62.5955	-57.7242
1533	-61.7803	-57.6782		-62.6316	-57.6519
1534	-61.6718	-57.6815		-62.6086	-57.6585
1535	-61.685	-57.7045		-62.6546	-57.642
1536	-61.7211	-57.7571		-62.579	-57.5664
1537	-61.708	-57.7899		-62.556	-57.4481
1538	-61.7343	-57.9116		-62.6316	-57.5204
1539	-61.8033	-57.8918		-62.6152	-57.4514
1540	-61.7737	-57.9313		-62.5889	-57.4547
1541	-61.8165	-57.8951		-62.6612	-57.3659
1542	-61.8625	-57.9214		-62.6053	-57.3758
1543	-61.8789	-57.9904		-62.6185	-57.3856
1544	-61.9841	-57.974		-62.6809	-57.4382
1545	-62.0005	-57.9872		-62.6842	-57.4349
1546	-62.0137	-58.0496		-62.6514	-57.504
1547	-61.9644	-58.1909		-62.6546	-57.5105
1548	-62.0334	-58.2107		-62.6283	-57.5138
1549	-62.0794	-58.2008		-62.6612	-57.5073
1550	-62.04	-58.2994		-62.5922	-57.527
1551	-62.0729	-58.3191		-62.5823	-57.4678
1552	-62.1024	-58.375		-62.6809	-57.4941
1553	-62.1123	-58.4046		-62.6415	-57.4481
1554	-62.132	-58.569		-62.8026	-57.4119
1555	-62.1287	-58.4901		-62.7993	-57.4514
1556	-62.1156	-58.5591		-62.9077	-57.5138
1557	-62.1912	-58.684		-62.8486	-57.458
1558	-62.201	-58.5887		-62.9439	-57.504
1559	-62.1813	-58.5591		-63.0096	-57.5434
1560	-62.1583	-58.6478		-63.0064	-57.5861
1561	-62.2076	-58.6117		-62.9373	-57.6322
1562	-62.1912	-58.6577		-62.9439	-57.6354
1563	-62.1879	-58.7366		-63.0096	-57.619
1564	-62.1715	-58.8352		-62.9472	-57.8031
1565	-62.1879	-58.7859		-63.0162	-57.7373
1566	-62.1846	-58.7234		-62.9505	-57.7834
1567	-62.2438	-58.7267		-62.9439	-57.8853
1568	-62.2306	-58.7629		-62.9801	-57.8721
1569	-62.2536	-58.8023		-62.9735	-57.8392
1570	-62.2997	-58.8188		-62.9735	-57.8787
1571	-62.3358	-58.7464		-63.0294	-57.9609
1572	-62.3161	-58.8845		-63.0064	-57.9477
1573	-62.3884	-58.8319		-63.0491	-57.9379
1574	-62.372	-58.7432		-62.9768	-57.9017
1575	-62.3621	-58.6347		-62.9636	-58.0299
1576	-62.4016	-58.6347		-63.0326	-58.1022
1577	-62.3457	-58.6577		-62.9932	-58.0332
1578	-62.3555	-58.638		-62.9636	-58.0956
1579	-62.3358	-58.6511		-62.9472	-58.1318
1580	-62.4574	-58.6906		-62.8617	-58.1088
1581	-62.4016	-58.7826		-62.8453	-58.2698
1582	-62.3358	-58.6643		-62.7993	-58.214
1583	-62.3983	-58.776		-62.8354	-58.1877
1584	-62.3424	-58.7399		-62.8256	-58.2172
1585	-62.4772	-58.7694		-62.7796	-58.1679
1586	-62.4311	-58.8516		-62.8124	-58.1942
1587	-62.5265	-58.8352		-62.773	-58.1515
1588	-62.5232	-58.8582		-62.7828	-58.2172
1589	-62.5528	-58.799		-62.6711	-58.2896
1590	-62.5725	-58.8582		-62.6941	-58.2994
1591	-62.6152	-58.8549		-62.5922	-58.3882
1592	-62.6448	-58.8089		-62.6448	-58.3421
1593	-62.6546	-58.8681		-62.6283	-58.421
1594	-62.5659	-58.8451		-62.5593	-58.4243
1595	-62.6086	-58.7727		-62.6021	-58.4999
1596	-62.5823	-58.822		-62.579	-58.5164
1597	-62.6514	-58.8812		-62.5396	-58.4375
1598	-62.6579	-58.8944		-62.5955	-58.4309
1599	-62.6842	-58.8976		-62.6218	-58.5657
1600	-62.6119	-58.9995		-62.5922	-58.5098
1601	-62.704	-58.9535		-62.6119	-58.5952
1602	-62.6645	-58.9338		-62.6086	-58.4506
1603	-62.7401	-58.9305		-62.5725	-58.4703
1604	-62.7237	-58.9897		-62.5002	-58.5164
1605	-62.727	-58.9963		-62.487	-58.5196
1606	-62.7565	-58.9469		-62.4903	-58.5525
1607	-62.7467	-58.9305		-62.487	-58.5887
1608	-62.7631	-58.9732		-62.4607	-58.6511
1609	-62.8321	-59.0554		-62.4903	-58.6018
1610	-62.888	-59.0488		-62.4673	-58.6314
1611	-62.911	-59.0686		-62.5232	-58.6248
1612	-62.8519	-59.1343		-62.5922	-58.5492
1613	-62.8584	-59.0817		-62.6251	-58.5788
1614	-62.8782	-59.1277		-62.6382	-58.5394
1615	-62.9636	-59.0784		-62.6941	-58.5361
1616	-62.9538	-59.1212		-62.7204	-58.5492
1617	-62.9373	-59.1442		-62.7467	-58.6281
1618	-62.9209	-59.1935		-62.8847	-58.6708
1619	-62.9143	-59.1902		-62.7697	-58.6741
1620	-62.9538	-59.2099		-62.7993	-58.6314
1621	-62.9735	-59.3315		-62.7368	-58.6413
1622	-63.0096	-59.3743		-62.7796	-58.6314
1623	-63.0557	-59.325		-62.819	-58.6281
1624	-63.0326	-59.2724		-62.8847	-58.73
1625	-63.1477	-59.417		-62.8979	-58.7662
1626	-63.1214	-59.4203		-63.0326	-58.799
1627	-63.1806	-59.44		-63.082	-58.8188
1628	-63.1378	-59.5254		-63.1378	-58.7727
1629	-63.1773	-59.6109		-63.2397	-58.8319
1630	-63.1839	-59.5715		-63.2594	-58.8089
1631	-63.197	-59.6997		-63.2989	-58.7333
1632	-63.1674	-59.6931		-63.3252	-58.6807
1633	-63.1543	-59.6504		-63.5323	-58.753
1634	-63.1806	-59.6011		-63.552	-58.7563
1635	-63.2036	-59.6635		-63.5783	-58.707
1636	-63.1937	-59.5912		-63.5947	-58.7464
1637	-63.2594	-59.5748		-63.644	-58.7399
1638	-63.2364	-59.6043		-63.7722	-58.8188
1639	-63.1937	-59.6504		-63.7722	-58.799
1640	-63.2167	-59.5912		-63.838	-58.7826
1641	-63.22	-59.4827		-63.8412	-58.799
1642	-63.2266	-59.5024		-63.9366	-58.8253
1643	-63.2364	-59.4992		-63.9168	-58.8385
1644	-63.1871	-59.5123		-63.884	-58.8319
1645	-63.2134	-59.486		-63.9662	-58.8944
1646	-63.1773	-59.4827		-63.8741	-58.8023
1647	-63.2825	-59.532		-63.8807	-58.9437
1648	-63.2167	-59.5353		-64.0089	-58.9207
1649	-63.2036	-59.5287		-63.9924	-58.9601
1650	-63.2003	-59.4696		-64.0056	-58.9995
1651	-63.1608	-59.5879		-63.9004	-59.0488
1652	-63.2496	-59.5485		-63.9103	-59.0521
1653	-63.1444	-59.578		-63.9662	-59.1212
1654	-63.1773	-59.5517		-63.9267	-59.1014
1655	-63.0392	-59.5189		-63.9366	-59.0521
1656	-63.0064	-59.5189		-63.8544	-59.108
1657	-62.9965	-59.4959		-63.8675	-59.2099
1658	-63.0524	-59.5189		-63.9892	-59.1869
1659	-63.105	-59.4597		-63.8708	-59.1869
1660	-63.1378	-59.4729		-63.69	-59.1343
1661	-63.1148	-59.4827		-63.6966	-59.1507
1662	-63.0852	-59.532		-63.6605	-59.1113
1663	-63.0984	-59.4301		-63.6177	-59.1869
1664	-63.0458	-59.4663		-63.6375	-59.1606
1665	-62.9702	-59.4762		-63.5881	-59.1705
1666	-63.1148	-59.509		-63.5224	-59.1409
1667	-63.082	-59.5156		-63.5586	-59.0916
1668	-63.1345	-59.4433		-63.5257	-59.1442
1669	-63.1608	-59.3775		-63.483	-59.1738
1670	-63.1904	-59.3545		-63.4271	-59.2198
1671	-63.2397	-59.2888		-63.4041	-59.2132
1672	-63.2923	-59.2855		-63.3909	-59.1803
1673	-63.1904	-59.2526		-63.4041	-59.1507
1674	-63.2134	-59.2296		-63.3416	-59.2789
1675	-63.1904	-59.2559		-63.3515	-59.2461
1676	-63.2529	-59.2329		-63.3219	-59.2198
1677	-63.2332	-59.2395		-63.2923	-59.2
1678	-63.2101	-59.2494		-63.2594	-59.2263
1679	-63.1543	-59.1738		-63.2726	-59.2132
1680	-63.2693	-59.1836		-63.2726	-59.3052
1681	-63.3285	-59.2165		-63.2266	-59.2395
1682	-63.22	-59.177		-63.2332	-59.1836
1683	-63.1345	-59.1902		-63.2792	-59.1474
1684	-63.0918	-59.2428		-63.22	-59.1705
1685	-63.1017	-59.177		-63.1773	-59.2263
1686	-63.1871	-59.2263		-63.1839	-59.1935
1687	-63.2496	-59.1474		-63.2594	-59.1606
1688	-63.266	-59.1803		-63.2266	-59.154
1689	-63.2496	-59.2263		-63.2167	-59.1738
1690	-63.2562	-59.0784		-63.1345	-59.0357
1691	-63.1904	-59.131		-63.1378	-59.0094
1692	-63.1411	-59.0817		-63.1937	-58.9338
1693	-63.2003	-59.0916		-63.2036	-58.97
1694	-63.1608	-59.1146		-63.2003	-58.9371
1695	-63.174	-59.0423		-63.0787	-58.753
1696	-63.1707	-59.1212		-63.0688	-58.7662
1697	-63.2266	-59.0883		-63.082	-58.73
1698	-63.2332	-59.0488		-63.0491	-58.6971
1699	-63.2989	-59.0981		-63.1148	-58.6676
1700	-63.2167	-59.0653		-63.105	-58.6051
1701	-63.1345	-59.1376		-63.1313	-58.5065
1702	-63.174	-59.1047		-63.082	-58.5854
1703	-63.1148	-59.1573		-63.0557	-58.6018
1704	-63.1313	-59.1343		-62.934	-58.6643
1705	-63.151	-59.108		-63.0852	-58.6281
1706	-63.1904	-59.154		-63.0622	-58.592
1707	-63.0458	-59.131		-63.1378	-58.5164
1708	-63.0557	-59.0916		-63.0392	-58.5755
1709	-62.9603	-59.0718		-62.9965	-58.4769
1710	-62.9143	-59.0193		-63.1378	-58.3487
1711	-62.9143	-58.9897		-63.0688	-58.4112
1712	-62.9308	-59.0258		-62.9702	-58.2698
1713	-62.9669	-59.039		-62.9209	-58.329
1714	-63.0129	-59.0357		-62.9045	-58.3454
1715	-63.0294	-59.0258		-62.911	-58.3191
1716	-63.0195	-58.9371		-62.9209	-58.26
1717	-62.9833	-59.0225		-62.9899	-58.2337
1718	-62.9932	-58.9765		-62.888	-58.2468
1719	-62.9373	-58.8878		-62.9077	-58.2567
1720	-62.8814	-58.8352		-62.9899	-58.2896
1721	-62.8256	-58.8253		-62.9669	-58.1909
1722	-62.8026	-58.7925		-62.8946	-58.214
1723	-62.8289	-58.8023		-62.9768	-58.2435
1724	-62.7237	-58.7859		-62.8256	-58.1647
1725	-62.7007	-58.8089		-62.7697	-58.1515
1726	-62.6645	-58.6708		-62.7434	-58.1351
1727	-62.7007	-58.6676		-62.6908	-58.1285
1728	-62.6777	-58.5657		-62.7237	-58.1679
1729	-62.6941	-58.5361		-62.6579	-58.1285
1730	-62.6448	-58.5262		-62.704	-58.1153
1731	-62.6021	-58.5098		-62.6514	-58.1252
1732	-62.6645	-58.5032		-62.6579	-58.0726
1733	-62.6251	-58.4703		-62.6908	-58.0759
1734	-62.5593	-58.4342		-62.5593	-58.066
1735	-62.5133	-58.4408		-62.6514	-58.0956
1736	-62.4509	-58.421		-62.5396	-58.0299
1737	-62.4509	-58.3849		-62.5593	-58.0069
1738	-62.4804	-58.4802		-62.5626	-58.0036
1739	-62.4311	-58.2994		-62.5232	-58.0595
1740	-62.3753	-58.2501		-62.5495	-58.1745
1741	-62.3785	-58.2337		-62.4278	-58.1351
1742	-62.3259	-58.2074		-62.3785	-58.0529
1743	-62.2438	-58.1745		-62.4311	-58.0759
1744	-62.2339	-58.1647		-62.4607	-58.0956
1745	-62.1813	-58.214		-62.4443	-58.1219
1746	-62.1583	-58.2205		-62.3588	-58.1022
1747	-61.9907	-58.2961		-62.4246	-58.0397
1748	-62.0367	-58.283		-62.4016	-58.1153
1749	-62.0597	-58.1942		-62.3391	-58.0463
1750	-61.9348	-58.2468		-62.3161	-58.0332
1751	-61.9381	-58.1844		-62.2832	-58.0858
1752	-61.8888	-58.2731		-62.1945	-58.1088
1753	-61.9151	-58.214		-62.1912	-58.0562
1754	-61.8723	-58.2863		-62.1912	-58.0365
1755	-61.7507	-58.2994		-62.2208	-58.1975
1756	-61.7836	-58.3619		-62.1649	-58.02
1757	-61.8592	-58.3027		-62.1517	-58.0365
1758	-61.8099	-58.2567		-62.1254	-57.997
1759	-61.7442	-58.2074		-62.0663	-57.9904
1760	-61.7573	-58.237		-61.9907	-58.0529
1761	-61.8033	-58.2501		-62.0104	-58.0266
1762	-61.7343	-58.2665		-61.9184	-58.0299
1763	-61.7211	-58.2961		-61.9315	-57.9707
1764	-61.7474	-58.306		-61.9479	-57.9937
1765	-61.6686	-58.3027		-61.8362	-58.0332
1766	-61.7277	-58.237		-61.8986	-58.0167
1767	-61.7211	-58.3816		-61.8165	-58.0102
1768	-61.731	-58.421		-61.8756	-58.0562
1769	-61.7836	-58.3849		-61.7836	-57.9904
1770	-61.7442	-58.3553		-61.8723	-57.8853
1771	-61.7935	-58.4638		-61.7409	-57.9904
1772	-61.9479	-58.5591		-61.7967	-58.0134
1773	-61.9085	-58.5525		-61.7672	-58.0299
1774	-61.8625	-58.5328		-61.7409	-57.9543
1775	-61.8888	-58.6314		-61.7836	-57.9609
1776	-61.9151	-58.7399		-61.7507	-57.8622
1777	-61.8822	-58.7859		-61.7507	-57.9379
1778	-61.9217	-58.8516		-61.7803	-57.8721
1779	-61.9052	-58.9502		-61.8493	-57.9707
1780	-61.9249	-58.8681		-61.8625	-57.9576
1781	-61.9611	-58.8878		-61.8592	-57.9773
1782	-61.9414	-58.9897		-61.8756	-57.9543
1783	-61.9447	-58.9042		-61.9118	-57.9346
1784	-61.8986	-58.9798		-61.9348	-57.9313
1785	-61.9381	-58.9831		-61.9019	-57.9214
1786	-61.9414	-58.993		-61.9644	-57.9346
1787	-61.9282	-59.0718		-61.9249	-57.8491
1788	-61.9151	-59.0751		-62.0104	-57.8688
1789	-61.8362	-59.1672		-62.0005	-57.9379
1790	-61.8428	-59.2461		-62.0235	-57.9872
1791	-61.8559	-59.1705		-62.1156	-57.9346
1792	-61.9348	-59.2592		-62.0794	-57.8951
1793	-61.9447	-59.2263		-62.0663	-58.0102
1794	-61.9479	-59.4038		-62.0268	-58.043
1795	-61.9085	-59.4729		-62.0991	-58.0463
1796	-61.8395	-59.4893		-62.1189	-58.0036
1797	-61.9085	-59.4663		-62.1419	-58.02
1798	-61.8625	-59.6241		-62.2043	-57.9839
1799	-61.8986	-59.6043		-62.2438	-57.9904
1800	-61.9282	-59.6405		-62.2931	-57.9313
1801	-61.9808	-59.6405		-62.372	-58.0069
1802	-62.0531	-59.6405		-62.2536	-58.066
1803	-62.0761	-59.6767		-62.2471	-58.0792
1804	-62.1189	-59.7391		-62.3095	-58.1252
1805	-62.0794	-59.8048		-62.3753	-58.1351
1806	-62.0959	-59.6964		-62.3851	-58.1285
1807	-62.1057	-59.7753		-62.3917	-58.0825
1808	-62.0663	-59.841		-62.4772	-58.2008
1809	-62.1517	-59.933		-62.4476	-58.1877
1810	-62.1945	-59.9265		-62.4574	-58.1909
1811	-62.1748	-59.8476		-62.4541	-58.2994
1812	-62.1682	-59.9298		-62.4739	-58.306
1813	-62.2339	-59.956		-62.5528	-58.214
1814	-62.2273	-59.9823		-62.5528	-58.3027
1815	-62.2569	-59.9199		-62.5823	-58.329
1816	-62.2865	-59.933		-62.6152	-58.3619
1817	-62.2569	-59.9725		-62.6579	-58.4112
1818	-62.2504	-60.0185		-62.7401	-58.4375
1819	-62.2766	-60.0021		-62.7302	-58.3914
1820	-62.2273	-59.9232		-62.7335	-58.421
1821	-62.3621	-59.9462		-62.7401	-58.4177
1822	-62.2766	-60.0119		-62.7401	-58.3783
1823	-62.3062	-60.0415		-62.8124	-58.5098
1824	-62.3095	-59.9758		-62.8256	-58.4934
1825	-62.3062	-60.0054		-62.8552	-58.4901
1826	-62.2504	-59.9955		-62.9373	-58.4901
1827	-62.2438	-60.0054		-62.9603	-58.5492
1828	-62.1879	-59.9856		-63.0655	-58.4046
1829	-62.1057	-60.0021		-62.9899	-58.5196
1830	-62.0498	-59.9429		-62.9801	-58.5032
1831	-62.0466	-59.8936		-62.9439	-58.6676
1832	-62.04	-59.9955		-62.934	-58.6117
1833	-62.017	-59.9528		-62.9505	-58.638
1834	-62.017	-59.9823		-63.0392	-58.6478
1835	-62.0794	-59.9199		-62.9768	-58.6511
1836	-62.0696	-59.9856		-63.0031	-58.7004
1837	-62.0991	-59.9659		-63.0326	-58.7596
1838	-61.9742	-59.9659		-62.9603	-58.6939
1839	-62.0038	-59.9659		-63.0195	-58.6445
1840	-62.0827	-59.9495		-63.0359	-58.5985
1841	-62.0761	-59.9495		-63.0294	-58.7662
1842	-62.0498	-59.9002		-63.0326	-58.7366
1843	-61.9184	-59.9166		-63.0294	-58.6774
1844	-62.0433	-59.9429		-63.0031	-58.6643
1845	-62.04	-59.8706		-62.9373	-58.6873
1846	-61.9545	-59.8903		-62.9735	-58.6807
1847	-61.9742	-59.9988		-63.0425	-58.7201
1848	-61.971	-59.9495		-62.9308	-58.7497
1849	-62.0564	-60.0054		-63.0064	-58.7103
1850	-62.0498	-60.0152		-63.0589	-58.7169
1851	-62.0498	-60.0152		-63.0392	-58.7793
1852	-62.0367	-60.0744		-63.0524	-58.6741
1853	-62.1156	-60.0284		-63.0852	-58.6906
1854	-61.9742	-59.9593		-63.0688	-58.7004
1855	-61.9479	-59.9889		-63.0524	-58.6971
1856	-62.086	-59.9396		-63.1576	-58.6544
1857	-62.2438	-59.9922		-63.1148	-58.661
1858	-62.2076	-60.0119		-63.0951	-58.661
1859	-62.0696	-60.0185		-63.1181	-58.7957
1860	-62.1485	-60.0514		-63.0688	-58.8155
1861	-62.1517	-60.0547		-63.1576	-58.8976
1862	-62.1057	-60.1138		-63.2989	-58.9239
1863	-62.1879	-60.1072		-63.2923	-58.9765
1864	-62.1813	-60.1007		-63.2167	-58.993
1865	-62.2504	-60.1007		-63.2989	-58.8681
1866	-62.3259	-60.127		-63.3088	-58.9075
1867	-62.2799	-60.15		-63.2693	-58.8779
1868	-62.2799	-60.2157		-63.3416	-58.8648
1869	-62.2635	-60.1828		-63.4435	-58.7925
1870	-62.2241	-60.219		-63.5158	-58.8779
1871	-62.3325	-60.1927		-63.4928	-58.8681
1872	-62.3555	-60.2617		-63.4665	-58.8483
1873	-62.3785	-60.219		-63.4863	-58.8188
1874	-62.3687	-60.2749		-63.5619	-58.8812
1875	-62.2997	-60.2387		-63.6276	-58.8549
1876	-62.2241	-60.2782		-63.6112	-58.7727
1877	-62.2569	-60.3143		-63.552	-58.8089
1878	-62.2043	-60.3209		-63.667	-58.8319
1879	-62.2273	-60.288		-63.7098	-58.7694
1880	-62.2536	-60.3505		-63.7854	-58.7629
1881	-62.2208	-60.2716		-63.8248	-58.7596
1882	-62.1912	-60.3176		-63.7229	-58.8582
1883	-62.1386	-60.2519		-63.7328	-58.8089
1884	-62.1649	-60.3045		-63.8084	-58.822
1885	-62.2076	-60.2716		-63.861	-58.8483
1886	-62.178	-60.2782		-63.8643	-58.8615
1887	-62.1616	-60.219		-63.9103	-58.8944
1888	-62.1189	-60.2289		-63.9399	-58.8779
1889	-62.0893	-60.196		-63.9333	-58.8944
1890	-62.0498	-60.219		-64.0253	-58.9272
1891	-62.0794	-60.127		-63.9727	-58.9009
1892	-62.0038	-60.1335		-64.0385	-59.0324
1893	-61.9545	-60.1303		-64.0286	-59.0488
1894	-61.9545	-60.1993		-64.0187	-59.0653
1895	-61.9644	-60.1894		-64.0615	-58.97
1896	-62.0466	-60.1204		-64.0483	-58.9568
1897	-62.0137	-60.2124		-64.1765	-58.9338
1898	-61.9874	-60.1631		-64.0911	-58.8911
1899	-61.9414	-60.1237		-64.068	-59.0127
1900	-61.9479	-60.1171		-64.1469	-59.0225
1901	-61.9479	-60.1007		-64.1141	-59.0488
1902	-61.8855	-60.0678		-64.045	-59.0949
1903	-61.8822	-60.0284		-64.0713	-59.1179
1904	-61.823	-60.0941		-64.0319	-59.2329
1905	-61.8263	-60.1105		-63.9399	-59.2658
1906	-61.8526	-60.1467		-63.9563	-59.2263
1907	-61.8	-60.15		-63.9563	-59.2625
1908	-61.6784	-60.104		-63.9596	-59.4038
1909	-61.7474	-60.0481		-64.0023	-59.4268
1910	-61.7179	-60.1204		-63.8938	-59.4729
1911	-61.7277	-60.0514		-63.8215	-59.4663
1912	-61.6981	-60.1237		-63.7459	-59.4499
1913	-61.6554	-60.0086		-63.7393	-59.6241
1914	-61.6225	-60.0579		-63.6309	-59.5452
1915	-61.6193	-60.0251		-63.6835	-59.578
1916	-61.5437	-60.0185		-63.5684	-59.6405
1917	-61.5272	-59.9955		-63.5388	-59.703
1918	-61.5404	-60.0481		-63.4304	-59.6536
1919	-61.4286	-59.9692		-63.3778	-59.6931
1920	-61.4746	-59.9922		-63.3022	-59.6799
1921	-61.4385	-59.9856		-63.266	-59.6142
1922	-61.445	-60.1007		-63.2101	-59.7325
1923	-61.4779	-60.0382		-63.2101	-59.8246
1924	-61.4976	-59.9922		-63.128	-59.703
1925	-61.5568	-60.0415		-63.1411	-59.7391
1926	-61.5239	-60.0875		-63.0458	-59.7785
1927	-61.4845	-60.0349		-63.0951	-59.7621
1928	-61.4681	-59.9922		-63.0064	-59.818
1929	-61.4253	-59.9889		-62.9735	-59.7523
1930	-61.4122	-59.9067		-62.9077	-59.8114
1931	-61.4615	-59.9166		-62.8256	-59.8706
1932	-61.4516	-59.8443		-62.7796	-59.8673
1933	-61.4483	-59.887		-62.7171	-59.9265
1934	-61.4023	-59.8541		-62.8059	-59.8837
1935	-61.4319	-59.8706		-62.7237	-59.841
1936	-61.445	-59.8344		-62.6744	-59.9363
1937	-61.4089	-59.7818		-62.7598	-59.8772
1938	-61.3826	-59.7785		-62.6218	-59.9396
1939	-61.4483	-59.8607		-62.6842	-59.8706
1940	-61.3497	-59.7621		-62.7302	-59.9002
1941	-61.399	-59.7227		-62.6711	-59.91
1942	-61.4188	-59.6997		-62.704	-59.91
1943	-61.3399	-59.6043		-62.5988	-59.8607
1944	-61.3694	-59.6635		-62.6316	-59.864
1945	-61.3563	-59.6536		-62.5823	-59.9199
1946	-61.2906	-59.7292		-62.5725	-59.8607
1947	-61.2971	-59.703		-62.6415	-59.8969
1948	-61.261	-59.7588		-62.5856	-59.8081
1949	-61.2018	-59.6734		-62.6481	-59.8903
1950	-61.2445	-59.6011		-62.6021	-59.8969
1951	-61.1591	-59.6208		-62.556	-59.9856
1952	-61.1985	-59.6372		-62.4509	-59.9429
1953	-61.0868	-59.6175		-62.5166	-59.9692
1954	-61.0802	-59.6536		-62.5133	-59.8969
1955	-61.0013	-59.6569		-62.4772	-59.8377
1956	-61.0638	-59.7227		-62.4311	-59.8509
1957	-61.0835	-59.749		-62.4739	-59.8574
1958	-61.021	-59.6668		-62.4607	-59.8804
1959	-61.0506	-59.7095		-62.5166	-59.8772
1960	-60.9651	-59.6964		-62.4804	-59.9396
1961	-60.9717	-59.6438		-62.556	-59.8903
1962	-60.8928	-59.749		-62.533	-59.7753
1963	-60.9126	-59.6701		-62.5955	-59.8772
1964	-60.8797	-59.6438		-62.5856	-59.8772
1965	-60.9586	-59.6142		-62.6546	-59.8509
1966	-60.8402	-59.5583		-62.6612	-59.8706
1967	-60.8271	-59.6076		-62.5889	-59.8772
1968	-60.7252	-59.6274		-62.6777	-59.8213
1969	-60.8041	-59.6011		-62.6185	-59.8772
1970	-60.8107	-59.5978		-62.727	-59.8213
1971	-60.8271	-59.5649		-62.6842	-59.8739
1972	-60.7416	-59.5189		-62.6021	-59.8377
1973	-60.6923	-59.6438		-62.7993	-59.8246
1974	-60.6496	-59.5353		-62.6842	-59.7917
1975	-60.6397	-59.6011		-62.8124	-59.8147
1976	-60.5773	-59.6076		-62.8256	-59.7621
1977	-60.5115	-59.6043		-62.9012	-59.6602
1978	-60.4885	-59.5419		-62.7171	-59.6076
1979	-60.4359	-59.5353		-62.911	-59.5682
1980	-60.3899	-59.3512		-62.7697	-59.5649
1981	-60.3866	-59.4794		-62.9077	-59.6175
1982	-60.2913	-59.3447		-62.7763	-59.5189
1983	-60.3373	-59.3545		-62.796	-59.5649
1984	-60.3012	-59.2756		-62.7467	-59.4531
1985	-60.2256	-59.3085		-62.8157	-59.4499
1986	-60.2157	-59.3282		-62.8059	-59.3677
1987	-60.2519	-59.1343		-62.8584	-59.2921
1988	-60.196	-59.2165		-62.7467	-59.2987
1989	-60.127	-59.0883		-62.7204	-59.3217
1990	-60.1368	-59.0883		-62.7368	-59.3184
1991	-60.0974	-59.108		-62.773	-59.3677
1992	-60.0514	-58.9963		-62.7204	-59.3381
1993	-60.0842	-58.9667		-62.7861	-59.2888
1994	-60.0382	-58.8714		-62.7598	-59.3611
1995	-60.0382	-58.8615		-62.6645	-59.2987
1996	-59.9725	-58.7826		-62.6086	-59.3184
1997	-60.0316	-58.7234		-62.6349	-59.2362
1998	-60.0185	-58.7694		-62.6579	-59.2625
[truncated: 24,003 more rows]
