# Supplementary material for: Neural circuit mechanisms for transforming learned olfactory valences into wind-oriented movement
Source: eLife. 2023 Sep 18;12:e85756. doi: 10.7554/eLife.85756 (PMC10588983; doi:10.7554/eLife.85756)
Supplement: Figure 5—figure supplement 2—source data 2. [file elife-85756-fig5-figsupp2-data2.xlsx]

## Sheet: Sheet1
	OCT					MCH
Time (x10^-4) (sec)	Pre	SEM	Post	SEM		Pre	SEM	Post	SEM
1	0.111808	0.131766	-0.00391968	0.0642969		-0.225411	0.162961	-0.119602	0.280371
2	0.110853	0.131076	-0.00319991	0.0654551		-0.224029	0.163354	-0.120891	0.280856
3	0.109882	0.130383	-0.00250428	0.0666365		-0.222637	0.16376	-0.122203	0.281345
4	0.108895	0.129685	-0.00183323	0.067839		-0.221233	0.164179	-0.123537	0.281837
5	0.107892	0.128983	-0.0011872	0.0690607		-0.219817	0.164612	-0.124893	0.282333
6	0.106874	0.128276	-0.000566604	0.0702997		-0.218389	0.165058	-0.126271	0.282832
7	0.10584	0.127564	2.81797e-05	0.0715543		-0.216947	0.165517	-0.127672	0.283334
8	0.104791	0.126847	0.000596791	0.0728227		-0.215493	0.165991	-0.129094	0.283839
9	0.103727	0.126123	0.00113889	0.0741033		-0.214025	0.166478	-0.130537	0.284348
10	0.102648	0.125394	0.00165417	0.0753945		-0.212544	0.166979	-0.132001	0.284859
11	0.101555	0.124657	0.00214233	0.0766948		-0.211048	0.167494	-0.133485	0.285373
12	0.100447	0.123914	0.00260306	0.0780029		-0.209539	0.168022	-0.134989	0.28589
13	0.0993257	0.123163	0.00303606	0.0793172		-0.208015	0.168563	-0.136512	0.28641
14	0.09819	0.122405	0.00344105	0.0806367		-0.206476	0.169118	-0.138054	0.286933
15	0.0970408	0.121639	0.00381776	0.08196		-0.204923	0.169685	-0.139613	0.287458
16	0.0958781	0.120864	0.00416592	0.0832861		-0.203355	0.170265	-0.14119	0.287986
17	0.0947022	0.120081	0.00448533	0.0846138		-0.201772	0.170857	-0.142783	0.288517
18	0.0935136	0.119289	0.00477578	0.0859421		-0.200174	0.17146	-0.144391	0.289051
19	0.0923123	0.118487	0.00503711	0.08727		-0.198561	0.172075	-0.146014	0.289588
20	0.0910989	0.117676	0.00526918	0.0885966		-0.196934	0.1727	-0.14765	0.290127
21	0.0898734	0.116856	0.00547189	0.089921		-0.195291	0.173336	-0.149299	0.29067
22	0.0886364	0.116025	0.00564517	0.0912424		-0.193634	0.173981	-0.150959	0.291216
23	0.0873881	0.115185	0.005789	0.0925599		-0.191963	0.174634	-0.15263	0.291765
24	0.0861289	0.114334	0.00590338	0.0938727		-0.190277	0.175296	-0.15431	0.292318
25	0.0848592	0.113472	0.00598835	0.0951802		-0.188576	0.175965	-0.155998	0.292873
26	0.0835794	0.1126	0.00604397	0.0964816		-0.186862	0.176641	-0.157694	0.293433
27	0.0822898	0.111717	0.00607035	0.0977762		-0.185133	0.177322	-0.159395	0.293996
28	0.0809909	0.110823	0.00606761	0.0990635		-0.183391	0.178008	-0.161101	0.294562
29	0.0796833	0.109918	0.00603591	0.100343		-0.181636	0.178699	-0.16281	0.295132
30	0.0783672	0.109001	0.00597543	0.101614		-0.179867	0.179393	-0.164522	0.295706
31	0.0770433	0.108074	0.00588638	0.102876		-0.178085	0.180089	-0.166235	0.296284
32	0.075712	0.107136	0.005769	0.104128		-0.176291	0.180787	-0.167948	0.296865
33	0.0743738	0.106186	0.00562358	0.10537		-0.174484	0.181486	-0.16966	0.297451
34	0.0730294	0.105225	0.00545043	0.106602		-0.172666	0.182185	-0.171369	0.29804
35	0.0716792	0.104253	0.00524992	0.107823		-0.170835	0.182883	-0.173075	0.298633
36	0.070324	0.103271	0.00502245	0.109033		-0.168994	0.183579	-0.174776	0.29923
37	0.0689642	0.102277	0.00476844	0.110231		-0.167141	0.184272	-0.17647	0.299831
38	0.0676006	0.101272	0.00448839	0.111416		-0.165279	0.184962	-0.178158	0.300435
39	0.0662339	0.100257	0.0041828	0.112589		-0.163406	0.185648	-0.179836	0.301043
40	0.0648648	0.0992308	0.00385224	0.11375		-0.161524	0.186329	-0.181505	0.301656
41	0.0634939	0.0981946	0.00349734	0.114897		-0.159633	0.187003	-0.183163	0.302271
42	0.062122	0.0971483	0.00311876	0.116031		-0.157734	0.187671	-0.184808	0.302891
43	0.0607498	0.096092	0.00271722	0.117151		-0.155827	0.188331	-0.186439	0.303514
44	0.0593782	0.0950262	0.00229352	0.118257		-0.153912	0.188983	-0.188056	0.304141
45	0.0580078	0.093951	0.00184849	0.119349		-0.151991	0.189626	-0.189656	0.304772
46	0.0566394	0.0928667	0.00138303	0.120426		-0.150063	0.190259	-0.19124	0.305406
47	0.0552738	0.0917738	0.000898087	0.121489		-0.14813	0.190882	-0.192804	0.306043
48	0.0539118	0.0906725	0.000394645	0.122537		-0.146192	0.191493	-0.194349	0.306684
49	0.0525541	0.0895633	-0.00012625	0.123571		-0.144249	0.192093	-0.195874	0.307328
50	0.0512015	0.0884465	-0.000663515	0.124589		-0.142303	0.19268	-0.197376	0.307976
51	0.0498548	0.0873227	-0.00121604	0.125593		-0.140354	0.193254	-0.198856	0.308626
52	0.0485148	0.0861923	-0.0017827	0.126581		-0.138403	0.193815	-0.200312	0.30928
53	0.0471822	0.0850557	-0.00236235	0.127555		-0.13645	0.194362	-0.201742	0.309936
54	0.0458579	0.0839136	-0.00295384	0.128513		-0.134496	0.194894	-0.203147	0.310596
55	0.0445426	0.0827664	-0.00355601	0.129457		-0.132542	0.195411	-0.204524	0.311258
56	0.0432372	0.0816146	-0.00416766	0.130386		-0.130589	0.195912	-0.205873	0.311923
57	0.0419423	0.080459	-0.00478762	0.1313		-0.128637	0.196398	-0.207194	0.31259
58	0.0406587	0.0793	-0.00541471	0.1322		-0.126687	0.196867	-0.208484	0.31326
59	0.0393871	0.0781382	-0.00604773	0.133084		-0.124741	0.19732	-0.209743	0.313932
60	0.0381282	0.0769743	-0.00668549	0.133955		-0.122798	0.197756	-0.210971	0.314607
61	0.0368828	0.0758089	-0.0073268	0.13481		-0.120859	0.198174	-0.212165	0.315283
62	0.0356514	0.0746427	-0.00797045	0.135651		-0.118926	0.198576	-0.213327	0.315962
63	0.0344347	0.0734763	-0.00861525	0.136478		-0.116999	0.198959	-0.214453	0.316642
64	0.0332334	0.0723104	-0.00925998	0.137291		-0.115078	0.199325	-0.215544	0.317325
65	0.0320481	0.0711457	-0.00990344	0.138089		-0.113165	0.199672	-0.216599	0.318009
66	0.0308795	0.0699829	-0.0105445	0.138874		-0.111261	0.200001	-0.217617	0.318694
67	0.0297281	0.0688229	-0.0111818	0.139644		-0.109366	0.200312	-0.218597	0.319381
68	0.0285945	0.0676664	-0.0118145	0.140401		-0.107481	0.200604	-0.219538	0.320069
69	0.0274794	0.0665141	-0.0124412	0.141143		-0.105606	0.200876	-0.220441	0.320759
70	0.0263833	0.0653671	-0.0130608	0.141872		-0.103744	0.20113	-0.221303	0.321449
71	0.0253067	0.0642261	-0.0136723	0.142586		-0.101894	0.201365	-0.222125	0.32214
72	0.0242502	0.0630921	-0.0142746	0.143287		-0.100058	0.20158	-0.222907	0.322833
73	0.0232144	0.0619661	-0.0148666	0.143975		-0.0982371	0.201777	-0.223647	0.323526
74	0.0221996	0.060849	-0.0154473	0.144649		-0.0964313	0.201953	-0.224345	0.324219
75	0.0212065	0.059742	-0.0160156	0.145309		-0.0946419	0.202111	-0.225001	0.324913
76	0.0202354	0.058646	-0.0165706	0.145956		-0.0928699	0.202249	-0.225615	0.325608
77	0.0192869	0.0575622	-0.0171112	0.14659		-0.0911162	0.202368	-0.226186	0.326303
78	0.0183614	0.0564917	-0.0176365	0.147211		-0.0893817	0.202467	-0.226714	0.326998
79	0.0174594	0.0554358	-0.0181454	0.147819		-0.0876673	0.202547	-0.227199	0.327694
80	0.0165814	0.0543957	-0.0186372	0.148415		-0.0859738	0.202607	-0.22764	0.328389
81	0.0157278	0.0533726	-0.019111	0.148998		-0.0843022	0.202649	-0.228038	0.329085
82	0.014899	0.0523678	-0.0195658	0.149569		-0.0826533	0.202671	-0.228392	0.329781
83	0.0140956	0.0513827	-0.0200009	0.150128		-0.0810281	0.202675	-0.228702	0.330476
84	0.0133179	0.0504185	-0.0204153	0.150676		-0.0794273	0.20266	-0.228969	0.331171
85	0.0125664	0.0494767	-0.0208084	0.151212		-0.0778518	0.202626	-0.229192	0.331866
86	0.0118415	0.0485586	-0.0211793	0.151737		-0.0763025	0.202574	-0.229371	0.332561
87	0.0111434	0.0476657	-0.0215272	0.152252		-0.0747803	0.202503	-0.229507	0.333255
88	0.0104726	0.0467993	-0.0218513	0.152756		-0.0732858	0.202415	-0.2296	0.333948
89	0.00982925	0.0459608	-0.0221509	0.15325		-0.0718201	0.202308	-0.229651	0.33464
90	0.00921366	0.0451517	-0.0224253	0.153735		-0.0703839	0.202184	-0.229659	0.335332
91	0.008626	0.0443734	-0.0226736	0.154211		-0.0689781	0.202043	-0.229625	0.336023
92	0.00806643	0.0436273	-0.0228952	0.154677		-0.0676033	0.201884	-0.229549	0.336712
93	0.00753505	0.0429147	-0.0230892	0.155136		-0.0662604	0.201708	-0.229433	0.337401
94	0.00703195	0.0422371	-0.0232549	0.155586		-0.0649501	0.201516	-0.229276	0.338088
95	0.00655717	0.0415958	-0.0233916	0.156028		-0.063673	0.201307	-0.229079	0.338774
96	0.00611071	0.040992	-0.0234984	0.156463		-0.0624299	0.201081	-0.228843	0.339459
97	0.00569255	0.0404272	-0.0235747	0.156891		-0.0612214	0.20084	-0.228569	0.340142
98	0.00530259	0.0399023	-0.0236199	0.157313		-0.060048	0.200583	-0.228258	0.340823
99	0.00494072	0.0394185	-0.0236331	0.157729		-0.0589103	0.200311	-0.227909	0.341502
100	0.00460676	0.0389767	-0.0236139	0.158139		-0.0578088	0.200023	-0.227525	0.34218
101	0.00430051	0.0385779	-0.0235615	0.158544		-0.056744	0.19972	-0.227105	0.342855
102	0.00402176	0.0382227	-0.0234755	0.158944		-0.0557165	0.199403	-0.226652	0.343528
103	0.00377024	0.0379119	-0.0233553	0.159339		-0.0547266	0.199071	-0.226165	0.344199
104	0.0035457	0.0376458	-0.0232004	0.159731		-0.0537748	0.198725	-0.225647	0.344867
105	0.00334783	0.0374248	-0.0230105	0.160119		-0.0528615	0.198366	-0.225098	0.345532
106	0.00317633	0.037249	-0.0227851	0.160503		-0.0519869	0.197993	-0.224519	0.346194
107	0.00303084	0.0371185	-0.0225239	0.160885		-0.0511515	0.197606	-0.223912	0.346854
108	0.00291099	0.037033	-0.0222266	0.161264		-0.0503555	0.197207	-0.223278	0.34751
109	0.00281637	0.0369921	-0.0218928	0.161641		-0.0495993	0.196796	-0.222618	0.348163
110	0.00274654	0.0369953	-0.0215225	0.162015		-0.048883	0.196372	-0.221933	0.348812
111	0.00270105	0.0370419	-0.0211152	0.162388		-0.0482069	0.195936	-0.221225	0.349458
112	0.0026794	0.037131	-0.020671	0.16276		-0.0475712	0.195488	-0.220496	0.3501
113	0.00268109	0.0372616	-0.0201897	0.163131		-0.0469759	0.19503	-0.219747	0.350737
114	0.0027056	0.0374325	-0.0196711	0.1635		-0.0464212	0.19456	-0.218979	0.351371
115	0.00275239	0.0376426	-0.0191153	0.16387		-0.0459072	0.194081	-0.218194	0.352
116	0.00282094	0.0378904	-0.0185223	0.164239		-0.0454339	0.193591	-0.217393	0.352624
117	0.00291072	0.0381746	-0.0178921	0.164608		-0.0450013	0.193091	-0.216577	0.353244
118	0.00302118	0.0384938	-0.0172247	0.164977		-0.0446092	0.192583	-0.215749	0.353859
119	0.00315179	0.0388463	-0.0165203	0.165347		-0.0442578	0.192065	-0.214909	0.354468
120	0.00330204	0.0392306	-0.0157791	0.165717		-0.0439467	0.191539	-0.214058	0.355072
121	0.00347139	0.0396453	-0.0150012	0.166089		-0.0436759	0.191004	-0.213199	0.355671
122	0.00365932	0.0400887	-0.0141869	0.166461		-0.0434452	0.190462	-0.212332	0.356263
123	0.0038653	0.0405594	-0.0133365	0.166834		-0.0432544	0.189913	-0.21146	0.356849
124	0.00408881	0.0410557	-0.0124502	0.167209		-0.0431032	0.189357	-0.210582	0.357429
125	0.00432936	0.0415764	-0.0115285	0.167585		-0.0429913	0.188794	-0.2097	0.358003
126	0.00458645	0.0421198	-0.0105717	0.167962		-0.0429185	0.188225	-0.208816	0.35857
127	0.0048596	0.0426845	-0.00958023	0.168341		-0.0428844	0.18765	-0.207931	0.359129
128	0.00514833	0.0432693	-0.00855465	0.168722		-0.0428887	0.18707	-0.207046	0.359681
129	0.00545213	0.0438727	-0.00749544	0.169104		-0.042931	0.186486	-0.206162	0.360226
130	0.00577051	0.0444934	-0.00640313	0.169488		-0.0430111	0.185897	-0.20528	0.360763
131	0.00610297	0.0451302	-0.00527833	0.169874		-0.0431285	0.185304	-0.204402	0.361292
132	0.00644899	0.0457818	-0.00412163	0.170261		-0.0432828	0.184709	-0.203527	0.361812
133	0.00680807	0.0464472	-0.00293367	0.17065		-0.0434738	0.18411	-0.202658	0.362324
134	0.00717971	0.0471251	-0.0017151	0.171041		-0.043701	0.18351	-0.201795	0.362826
135	0.0075634	0.0478144	-0.000466619	0.171433		-0.043964	0.182908	-0.200938	0.36332
136	0.00795864	0.0485141	0.000811061	0.171827		-0.0442625	0.182305	-0.200089	0.363804
137	0.00836496	0.0492232	0.00211718	0.172222		-0.0445959	0.181702	-0.199249	0.364278
138	0.00878185	0.0499407	0.00345097	0.172618		-0.0449639	0.181099	-0.198418	0.364742
139	0.00920885	0.0506657	0.00481162	0.173016		-0.0453659	0.180497	-0.197597	0.365196
140	0.00964545	0.0513971	0.00619831	0.173414		-0.0458015	0.179897	-0.196787	0.365639
141	0.0100912	0.0521341	0.00761021	0.173814		-0.0462702	0.179299	-0.195987	0.366072
142	0.0105455	0.0528759	0.00904648	0.174214		-0.0467713	0.178704	-0.1952	0.366493
143	0.0110078	0.0536216	0.0105062	0.174614		-0.0473044	0.178113	-0.194424	0.366903
144	0.0114778	0.0543704	0.0119886	0.175015		-0.0478689	0.177526	-0.193661	0.367302
145	0.0119548	0.0551215	0.0134928	0.175416		-0.0484641	0.176945	-0.192912	0.367688
146	0.0124382	0.0558741	0.0150177	0.175817		-0.0490893	0.176369	-0.192176	0.368063
147	0.0129277	0.0566274	0.0165626	0.176217		-0.0497437	0.1758	-0.191454	0.368425
148	0.0134226	0.0573808	0.0181265	0.176617		-0.0504268	0.175238	-0.190747	0.368774
149	0.0139224	0.0581335	0.0197085	0.177016		-0.0511374	0.174684	-0.190055	0.369111
150	0.0144267	0.0588849	0.0213077	0.177414		-0.0518749	0.174139	-0.189377	0.369435
151	0.0149348	0.0596342	0.0229231	0.17781		-0.0526383	0.173604	-0.188715	0.369745
152	0.0154463	0.060381	0.0245538	0.178204		-0.0534265	0.173078	-0.188068	0.370042
153	0.0159607	0.0611245	0.026199	0.178597		-0.0542386	0.172564	-0.187437	0.370326
154	0.0164775	0.0618641	0.0278575	0.178987		-0.0550735	0.172061	-0.186822	0.370595
155	0.0169962	0.0625994	0.0295286	0.179374		-0.0559303	0.17157	-0.186223	0.370851
156	0.0175164	0.0633298	0.0312113	0.179758		-0.0568077	0.171092	-0.18564	0.371092
157	0.0180375	0.0640548	0.0329048	0.180139		-0.0577048	0.170627	-0.185072	0.371318
158	0.0185592	0.0647738	0.0346079	0.180516		-0.0586203	0.170176	-0.184521	0.371531
159	0.019081	0.0654865	0.03632	0.18089		-0.0595533	0.169739	-0.183986	0.371728
160	0.0196026	0.0661925	0.0380399	0.181258		-0.0605025	0.169318	-0.183467	0.371911
161	0.0201234	0.0668913	0.0397669	0.181622		-0.0614669	0.168912	-0.182964	0.372079
162	0.0206432	0.0675825	0.0415	0.181981		-0.0624453	0.168522	-0.182476	0.372231
163	0.0211616	0.0682659	0.0432383	0.182335		-0.0634365	0.168149	-0.182004	0.372369
164	0.0216781	0.068941	0.0449809	0.182683		-0.0644395	0.167792	-0.181548	0.372492
165	0.0221925	0.0696076	0.0467269	0.183025		-0.065453	0.167452	-0.181107	0.372599
166	0.0227044	0.0702653	0.0484755	0.18336		-0.0664758	0.167129	-0.180681	0.372692
167	0.0232136	0.0709138	0.0502259	0.183689		-0.0675069	0.166824	-0.18027	0.372769
168	0.0237198	0.0715529	0.0519771	0.184011		-0.0685449	0.166536	-0.179873	0.372832
169	0.0242226	0.0721823	0.0537284	0.184326		-0.0695887	0.166267	-0.179491	0.372879
170	0.0247219	0.0728017	0.055479	0.184633		-0.070637	0.166015	-0.179122	0.372911
171	0.0252173	0.073411	0.057228	0.184932		-0.0716889	0.165781	-0.178766	0.372928
172	0.0257087	0.0740099	0.0589747	0.185223		-0.072743	0.165565	-0.178423	0.37293
173	0.0261959	0.0745982	0.0607184	0.185505		-0.0737983	0.165366	-0.178092	0.372918
174	0.0266785	0.0751758	0.0624586	0.185779		-0.0748537	0.165185	-0.177773	0.37289
175	0.0271566	0.0757425	0.0641945	0.186043		-0.075908	0.165022	-0.177465	0.372848
176	0.0276298	0.0762981	0.0659256	0.186298		-0.07696	0.164875	-0.177167	0.372792
177	0.0280981	0.0768426	0.0676513	0.186543		-0.0780088	0.164745	-0.176879	0.372721
178	0.0285613	0.0773757	0.0693711	0.186778		-0.0790533	0.164632	-0.1766	0.372635
179	0.0290193	0.0778975	0.0710845	0.187002		-0.0800924	0.164534	-0.17633	0.372536
180	0.029472	0.0784078	0.0727911	0.187216		-0.081125	0.164452	-0.176067	0.372422
181	0.0299192	0.0789066	0.0744903	0.187419		-0.0821503	0.164384	-0.175811	0.372295
182	0.0303608	0.0793939	0.0761818	0.18761		-0.0831671	0.16433	-0.175561	0.372154
183	0.0307968	0.0798696	0.0778652	0.18779		-0.0841747	0.16429	-0.175316	0.371999
184	0.031227	0.0803339	0.07954	0.187958		-0.085172	0.164262	-0.175076	0.371831
185	0.0316514	0.0807866	0.0812057	0.188113		-0.0861581	0.164247	-0.17484	0.37165
186	0.0320699	0.0812279	0.0828621	0.188256		-0.0871321	0.164243	-0.174607	0.371456
187	0.0324825	0.0816579	0.0845087	0.188386		-0.0880933	0.164249	-0.174376	0.371248
188	0.032889	0.0820766	0.0861451	0.188502		-0.0890407	0.164265	-0.174147	0.371029
189	0.0332896	0.0824841	0.0877708	0.188605		-0.0899736	0.16429	-0.173918	0.370796
190	0.0336841	0.0828807	0.0893855	0.188694		-0.0908913	0.164322	-0.173689	0.370552
191	0.0340726	0.0832664	0.0909889	0.188768		-0.091793	0.164361	-0.17346	0.370295
192	0.0344551	0.0836415	0.0925804	0.188829		-0.0926782	0.164407	-0.173229	0.370027
193	0.0348316	0.0840062	0.0941599	0.188874		-0.0935461	0.164457	-0.172996	0.369747
194	0.0352022	0.0843607	0.0957268	0.188904		-0.0943963	0.164512	-0.172759	0.369456
195	0.035567	0.0847053	0.0972809	0.188919		-0.0952281	0.16457	-0.172518	0.369154
196	0.0359261	0.0850403	0.0988218	0.188917		-0.096041	0.16463	-0.172273	0.368842
197	0.0362796	0.0853659	0.100349	0.1889		-0.0968346	0.164692	-0.172022	0.368518
198	0.0366277	0.0856824	0.101863	0.188867		-0.0976084	0.164753	-0.171765	0.368185
199	0.0369706	0.0859902	0.103362	0.188817		-0.098362	0.164815	-0.1715	0.367841
200	0.0373084	0.0862897	0.104847	0.188749		-0.0990951	0.164874	-0.171228	0.367488
201	0.0376413	0.0865812	0.106318	0.188665		-0.0998072	0.164932	-0.170946	0.367126
202	0.0379695	0.086865	0.107774	0.188563		-0.100498	0.164986	-0.170655	0.366754
203	0.038293	0.0871415	0.109215	0.188444		-0.101168	0.165035	-0.170353	0.366374
204	0.0386122	0.0874111	0.110641	0.188306		-0.101815	0.16508	-0.17004	0.365985
205	0.0389271	0.0876743	0.112052	0.18815		-0.102441	0.165119	-0.169714	0.365588
206	0.039238	0.0879313	0.113447	0.187976		-0.103044	0.165151	-0.169375	0.365183
207	0.039545	0.0881827	0.114828	0.187783		-0.103626	0.165175	-0.169023	0.36477
208	0.0398482	0.0884288	0.116193	0.187571		-0.104184	0.165191	-0.168655	0.36435
209	0.040148	0.08867	0.117543	0.18734		-0.10472	0.165198	-0.168271	0.363924
210	0.0404443	0.0889067	0.118879	0.187089		-0.105233	0.165195	-0.167872	0.36349
211	0.0407374	0.0891395	0.120199	0.186818		-0.105724	0.165182	-0.167454	0.363051
212	0.0410274	0.0893686	0.121504	0.186528		-0.106192	0.165158	-0.167019	0.362606
213	0.0413144	0.0895945	0.122796	0.186218		-0.106637	0.165122	-0.166564	0.362155
214	0.0415985	0.0898177	0.124073	0.185887		-0.10706	0.165074	-0.166089	0.3617
215	0.0418796	0.0900384	0.125336	0.185536		-0.107461	0.165014	-0.165594	0.361239
216	0.042158	0.0902571	0.126585	0.185165		-0.107839	0.164942	-0.165077	0.360775
217	0.0424335	0.0904742	0.127822	0.184773		-0.108194	0.164856	-0.164538	0.360307
218	0.0427063	0.0906901	0.129046	0.18436		-0.108528	0.164757	-0.163975	0.359835
219	0.0429763	0.0909051	0.130257	0.183926		-0.10884	0.164645	-0.163389	0.359361
220	0.0432437	0.0911196	0.131458	0.183472		-0.10913	0.164519	-0.162777	0.358884
221	0.0435084	0.0913339	0.132648	0.182996		-0.109398	0.164379	-0.16214	0.358405
222	0.0437706	0.0915484	0.133827	0.182499		-0.109645	0.164226	-0.161476	0.357924
223	0.0440301	0.0917634	0.134997	0.181981		-0.109871	0.164058	-0.160786	0.357442
224	0.0442871	0.0919793	0.136158	0.181442		-0.110075	0.163877	-0.160067	0.356959
225	0.0445416	0.0921964	0.137311	0.180881		-0.110259	0.163683	-0.15932	0.356476
226	0.0447934	0.092415	0.138457	0.180299		-0.110423	0.163474	-0.158544	0.355993
227	0.0450427	0.0926354	0.139596	0.179697		-0.110566	0.163252	-0.157739	0.35551
228	0.0452892	0.092858	0.140729	0.179073		-0.110689	0.163017	-0.156903	0.355028
229	0.0455329	0.093083	0.141858	0.178428		-0.110792	0.162769	-0.156036	0.354548
230	0.0457737	0.0933107	0.142982	0.177763		-0.110876	0.162508	-0.155137	0.354069
231	0.0460115	0.0935415	0.144102	0.177076		-0.110941	0.162235	-0.154207	0.353593
232	0.0462461	0.0937757	0.14522	0.17637		-0.110988	0.16195	-0.153243	0.353118
233	0.0464773	0.0940134	0.146337	0.175643		-0.111015	0.161653	-0.152247	0.352647
234	0.0467051	0.0942552	0.147452	0.174896		-0.111025	0.161345	-0.151217	0.352178
235	0.0469293	0.0945012	0.148567	0.174129		-0.111017	0.161026	-0.150154	0.351713
236	0.0471497	0.0947518	0.149682	0.173343		-0.110991	0.160697	-0.149056	0.351251
237	0.0473662	0.0950073	0.150798	0.172537		-0.110948	0.160358	-0.147923	0.350793
238	0.0475786	0.095268	0.151917	0.171713		-0.110888	0.160009	-0.146755	0.350339
239	0.0477868	0.0955342	0.153038	0.170869		-0.110811	0.159651	-0.145553	0.349889
240	0.0479905	0.0958063	0.154163	0.170008		-0.110718	0.159285	-0.144315	0.349444
241	0.0481896	0.0960845	0.155292	0.169128		-0.110607	0.158911	-0.143041	0.349003
242	0.048384	0.0963691	0.156426	0.168231		-0.110481	0.158529	-0.141732	0.348567
243	0.0485734	0.0966606	0.157565	0.167317		-0.110338	0.15814	-0.140388	0.348135
244	0.0487577	0.0969591	0.158711	0.166385		-0.110179	0.157745	-0.139008	0.347709
245	0.0489366	0.097265	0.159865	0.165438		-0.110003	0.157344	-0.137593	0.347287
246	0.04911	0.0975786	0.161026	0.164474		-0.109812	0.156937	-0.136142	0.34687
247	0.0492775	0.0979003	0.162196	0.163495		-0.109606	0.156525	-0.134657	0.346459
248	0.049439	0.0982303	0.163374	0.1625		-0.109383	0.156109	-0.133136	0.346052
249	0.0495943	0.0985689	0.164563	0.161491		-0.109145	0.155689	-0.131581	0.345651
250	0.0497432	0.0989166	0.165761	0.160468		-0.108892	0.155265	-0.129992	0.345255
251	0.0498853	0.0992736	0.16697	0.159431		-0.108624	0.154838	-0.12837	0.344864
252	0.0500206	0.0996404	0.16819	0.158381		-0.10834	0.154409	-0.126713	0.344479
253	0.0501488	0.100017	0.169422	0.157318		-0.108042	0.153978	-0.125024	0.344098
254	0.0502696	0.100404	0.170665	0.156243		-0.107729	0.153545	-0.123303	0.343723
255	0.050383	0.100802	0.17192	0.155156		-0.107402	0.153112	-0.12155	0.343354
256	0.0504887	0.101212	0.173188	0.154059		-0.107061	0.152678	-0.119766	0.34299
257	0.0505865	0.101632	0.174468	0.152951		-0.106706	0.152244	-0.117951	0.342631
258	0.0506764	0.102065	0.175761	0.151833		-0.106337	0.15181	-0.116106	0.342277
259	0.050758	0.10251	0.177066	0.150705		-0.105955	0.151378	-0.114232	0.341929
260	0.0508312	0.102968	0.178384	0.149569		-0.10556	0.150948	-0.112329	0.341586
261	0.0508957	0.103439	0.179715	0.148425		-0.105152	0.15052	-0.110399	0.341248
262	0.0509515	0.103923	0.181059	0.147273		-0.104732	0.150095	-0.108442	0.340915
263	0.0509981	0.104421	0.182415	0.146114		-0.1043	0.149673	-0.106459	0.340588
264	0.0510353	0.104933	0.183784	0.144949		-0.103857	0.149255	-0.104451	0.340266
265	0.0510629	0.10546	0.185164	0.143779		-0.103402	0.148842	-0.102418	0.33995
266	0.0510803	0.106002	0.186557	0.142602		-0.102936	0.148434	-0.100363	0.339638
267	0.0510874	0.106558	0.187961	0.141422		-0.10246	0.148031	-0.0982851	0.339332
268	0.0510837	0.10713	0.189375	0.140237		-0.101974	0.147634	-0.0961861	0.33903
269	0.0510689	0.107718	0.190801	0.139049		-0.101478	0.147244	-0.0940669	0.338734
270	0.0510425	0.108321	0.192236	0.137858		-0.100973	0.146861	-0.0919287	0.338443
271	0.0510043	0.108941	0.193681	0.136665		-0.100458	0.146486	-0.0897725	0.338156
272	0.0509539	0.109577	0.195136	0.135471		-0.0999351	0.146119	-0.0875995	0.337874
273	0.0508909	0.110229	0.196598	0.134275		-0.0994039	0.14576	-0.0854108	0.337597
274	0.0508151	0.110898	0.198069	0.133078		-0.0988649	0.145411	-0.0832076	0.337324
275	0.0507261	0.111585	0.199546	0.131882		-0.0983185	0.145071	-0.0809912	0.337056
276	0.0506236	0.112288	0.201031	0.130686		-0.0977651	0.144741	-0.0787628	0.336792
277	0.0505075	0.113009	0.202521	0.129492		-0.0972051	0.144422	-0.0765237	0.336533
278	0.0503773	0.113746	0.204016	0.128299		-0.096639	0.144113	-0.0742752	0.336277
279	0.050233	0.114502	0.205516	0.127109		-0.0960673	0.143816	-0.0720186	0.336025
280	0.0500743	0.115275	0.20702	0.125922		-0.0954902	0.143531	-0.0697553	0.335778
281	0.049901	0.116065	0.208526	0.124738		-0.0949084	0.143258	-0.0674867	0.335534
282	0.049713	0.116873	0.210035	0.12356		-0.0943223	0.142997	-0.0652142	0.335295
283	0.0495101	0.117699	0.211545	0.122386		-0.0937322	0.142749	-0.0629392	0.335058
284	0.0492921	0.118542	0.213056	0.121217		-0.0931388	0.142514	-0.0606634	0.334826
285	0.0490591	0.119403	0.214566	0.120056		-0.0925423	0.142293	-0.0583881	0.334598
286	0.0488107	0.120281	0.216076	0.118901		-0.0919432	0.142086	-0.0561149	0.334373
287	0.0485471	0.121177	0.217583	0.117754		-0.091342	0.141893	-0.0538454	0.334151
288	0.048268	0.12209	0.219089	0.116616		-0.0907392	0.141714	-0.0515812	0.333933
289	0.0479735	0.12302	0.22059	0.115487		-0.0901351	0.14155	-0.0493238	0.333719
290	0.0476635	0.123968	0.222088	0.114368		-0.0895304	0.141402	-0.0470748	0.333508
291	0.0473378	0.124932	0.22358	0.11326		-0.0889254	0.141269	-0.0448359	0.3333
292	0.0469965	0.125913	0.225066	0.112164		-0.0883206	0.141151	-0.0426086	0.333096
293	0.0466396	0.126911	0.226546	0.11108		-0.0877164	0.14105	-0.0403946	0.332895
294	0.046267	0.127926	0.228018	0.110009		-0.0871134	0.140964	-0.0381955	0.332697
295	0.0458786	0.128957	0.229482	0.108953		-0.0865119	0.140895	-0.036013	0.332502
296	0.0454746	0.130004	0.230936	0.107911		-0.0859124	0.140842	-0.0338487	0.332311
297	0.0450548	0.131068	0.23238	0.106885		-0.0853152	0.140805	-0.0317043	0.332123
298	0.0446194	0.132147	0.233814	0.105876		-0.0847208	0.140786	-0.0295813	0.331937
299	0.0441684	0.133242	0.235236	0.104885		-0.0841297	0.140783	-0.0274814	0.331755
300	0.0437019	0.134352	0.236645	0.103912		-0.0835422	0.140797	-0.0254063	0.331576
301	0.0432199	0.135477	0.238041	0.102959		-0.0829587	0.140827	-0.0233575	0.331399
302	0.0427226	0.136617	0.239423	0.102026		-0.0823797	0.140875	-0.0213368	0.331226
303	0.0422099	0.137772	0.24079	0.101114		-0.0818055	0.140939	-0.0193456	0.331056
304	0.0416822	0.138942	0.242143	0.100224		-0.0812365	0.141021	-0.0173856	0.330889
305	0.0411395	0.140126	0.243479	0.0993563		-0.0806732	0.141119	-0.0154584	0.330724
306	0.0405819	0.141323	0.244798	0.0985127		-0.0801157	0.141233	-0.0135657	0.330563
307	0.0400098	0.142534	0.2461	0.0976935		-0.0795646	0.141364	-0.0117088	0.330405
308	0.0394234	0.143759	0.247384	0.0968994		-0.07902	0.141511	-0.00988946	0.33025
309	0.0388229	0.144996	0.248649	0.0961312		-0.0784823	0.141674	-0.00810907	0.330098
310	0.0382088	0.146246	0.249895	0.0953895		-0.0779519	0.141853	-0.00636911	0.329949
311	0.0375814	0.147509	0.251122	0.0946749		-0.0774289	0.142048	-0.00467104	0.329803
312	0.0369411	0.148783	0.252328	0.0939881		-0.0769138	0.142258	-0.00301624	0.32966
313	0.0362883	0.15007	0.253513	0.0933295		-0.0764068	0.142482	-0.0014061	0.32952
314	0.0356237	0.151368	0.254677	0.0926998		-0.0759081	0.142721	0.00015805	0.329384
315	0.0349478	0.152676	0.255819	0.0920992		-0.075418	0.142974	0.00167492	0.32925
316	0.034261	0.153996	0.256939	0.0915284		-0.0749368	0.143241	0.00314324	0.32912
317	0.0335641	0.155327	0.258036	0.0909875		-0.0744646	0.143521	0.00456181	0.328993
318	0.0328577	0.156667	0.25911	0.090477		-0.0740016	0.143813	0.00592947	0.328869
319	0.0321424	0.158018	0.26016	0.089997		-0.0735481	0.144118	0.00724509	0.328748
320	0.031419	0.159378	0.261187	0.0895477		-0.0731042	0.144434	0.0085076	0.32863
321	0.0306883	0.160747	0.26219	0.0891294		-0.0726702	0.144761	0.00971598	0.328516
322	0.0299511	0.162126	0.263168	0.0887419		-0.0722461	0.145099	0.0108693	0.328404
323	0.0292082	0.163513	0.264123	0.0883854		-0.0718323	0.145447	0.0119665	0.328296
324	0.0284607	0.16491	0.265052	0.0880597		-0.0714288	0.145805	0.0130069	0.328192
325	0.0277094	0.166314	0.265957	0.0877647		-0.0710357	0.14617	0.0139896	0.32809
326	0.0269556	0.167727	0.266838	0.0875001		-0.0706531	0.146544	0.0149138	0.327992
327	0.0262002	0.169147	0.267693	0.0872658		-0.0702811	0.146926	0.0157788	0.327896
328	0.0254443	0.170576	0.268524	0.0870612		-0.0699197	0.147314	0.016584	0.327805
329	0.0246891	0.172011	0.269329	0.086886		-0.0695689	0.147708	0.0173288	0.327716
330	0.0239358	0.173455	0.27011	0.0867396		-0.0692287	0.148108	0.0180126	0.327631
331	0.0231856	0.174905	0.270866	0.0866216		-0.0688991	0.148511	0.0186348	0.327549
332	0.0224395	0.176362	0.271598	0.0865311		-0.0685798	0.148919	0.0191951	0.327471
333	0.0216988	0.177825	0.272304	0.0864676		-0.0682709	0.14933	0.0196931	0.327397
334	0.0209646	0.179295	0.272986	0.0864302		-0.0679723	0.149744	0.0201285	0.327326
335	0.0202382	0.180772	0.273643	0.0864183		-0.0676838	0.150159	0.0205009	0.327259
336	0.0195206	0.182254	0.274275	0.086431		-0.0674052	0.150576	0.0208102	0.327195
337	0.0188131	0.183742	0.274883	0.0864673		-0.0671365	0.150992	0.0210562	0.327136
338	0.0181166	0.185235	0.275466	0.0865264		-0.0668773	0.151409	0.0212389	0.32708
339	0.0174325	0.186734	0.276025	0.0866074		-0.0666275	0.151824	0.0213583	0.327029
340	0.0167616	0.188237	0.27656	0.0867093		-0.0663868	0.152237	0.0214143	0.326982
341	0.0161052	0.189745	0.27707	0.0868311		-0.0661549	0.152648	0.0214072	0.32694
342	0.0154642	0.191257	0.277556	0.086972		-0.0659315	0.153055	0.021337	0.326901
343	0.0148397	0.192773	0.278019	0.0871308		-0.0657164	0.153459	0.021204	0.326868
344	0.0142326	0.194293	0.278457	0.0873067		-0.0655091	0.153858	0.0210083	0.326839
345	0.0136441	0.195816	0.278872	0.0874987		-0.0653093	0.154251	0.0207502	0.326814
346	0.0130749	0.197342	0.279263	0.0877058		-0.0651168	0.154638	0.0204303	0.326795
347	0.0125261	0.19887	0.279631	0.0879271		-0.064931	0.155019	0.0200487	0.32678
348	0.0119985	0.2004	0.279975	0.0881616		-0.0647517	0.155391	0.0196062	0.32677
349	0.011493	0.201931	0.280296	0.0884085		-0.0645784	0.155756	0.0191031	0.326766
350	0.0110104	0.203464	0.280594	0.088667		-0.0644107	0.156111	0.0185402	0.326766
351	0.0105515	0.204998	0.28087	0.0889361		-0.0642484	0.156456	0.0179182	0.326772
352	0.010117	0.206532	0.281122	0.0892151		-0.064091	0.156792	0.0172377	0.326782
353	0.0097076	0.208066	0.281352	0.0895031		-0.0639382	0.157116	0.0164994	0.326798
354	0.00932398	0.209599	0.281559	0.0897994		-0.0637897	0.157428	0.0157042	0.32682
355	0.00896677	0.211132	0.281744	0.0901034		-0.0636453	0.157728	0.0148529	0.326847
356	0.00863658	0.212663	0.281907	0.0904142		-0.0635047	0.158015	0.0139462	0.326879
357	0.00833402	0.214191	0.282048	0.0907312		-0.0633679	0.158288	0.0129851	0.326917
358	0.00805968	0.215718	0.282167	0.0910539		-0.0632347	0.158547	0.0119705	0.32696
359	0.00781412	0.217241	0.282264	0.0913815		-0.063105	0.15879	0.0109033	0.32701
360	0.00759793	0.218761	0.282341	0.0917137		-0.0629786	0.159019	0.00978436	0.327065
361	0.00741166	0.220277	0.282396	0.0920497		-0.0628557	0.159231	0.00861482	0.327126
362	0.00725584	0.221789	0.282431	0.0923892		-0.062736	0.159426	0.00739568	0.327193
363	0.00713098	0.223295	0.282445	0.0927316		-0.0626195	0.159604	0.00612802	0.327266
364	0.00703759	0.224796	0.28244	0.0930764		-0.0625062	0.159763	0.00481297	0.327345
365	0.0069761	0.226291	0.282415	0.0934234		-0.0623961	0.159904	0.00345169	0.327429
366	0.00694695	0.227779	0.282372	0.093772		-0.062289	0.160026	0.00204541	0.32752
367	0.00695051	0.22926	0.28231	0.0941219		-0.062185	0.160129	0.000595409	0.327617
368	0.00698712	0.230734	0.28223	0.0944728		-0.062084	0.160211	-0.000897017	0.32772
369	0.00705711	0.232199	0.282133	0.0948243		-0.061986	0.160272	-0.00243052	0.327828
370	0.00716075	0.233655	0.28202	0.0951761		-0.061891	0.160312	-0.00400373	0.327943
371	0.0072983	0.235102	0.28189	0.095528		-0.061799	0.160331	-0.00561526	0.328063
372	0.00746996	0.236539	0.281746	0.0958797		-0.0617101	0.160327	-0.00726368	0.328188
373	0.00767587	0.237965	0.281586	0.096231		-0.0616241	0.160301	-0.00894759	0.32832
374	0.00791614	0.23938	0.281413	0.0965817		-0.0615412	0.160252	-0.0106655	0.328456
375	0.0081908	0.240783	0.281226	0.0969315		-0.0614613	0.160179	-0.0124161	0.328599
376	0.00849981	0.242174	0.281027	0.0972803		-0.0613846	0.160083	-0.0141977	0.328746
377	0.00884309	0.243552	0.280816	0.0976279		-0.0613112	0.159964	-0.0160091	0.328898
378	0.00922047	0.244916	0.280594	0.0979742		-0.0612411	0.15982	-0.0178485	0.329055
379	0.00963171	0.246266	0.280362	0.0983192		-0.0611746	0.159652	-0.0197147	0.329217
380	0.0100765	0.247601	0.280121	0.0986627		-0.0611118	0.15946	-0.0216061	0.329384
381	0.0105544	0.248921	0.27987	0.0990047		-0.0610529	0.159243	-0.0235212	0.329554
382	0.011065	0.250224	0.279612	0.0993451		-0.0609982	0.159001	-0.0254584	0.329729
383	0.0116077	0.251512	0.279347	0.0996839		-0.0609479	0.158735	-0.0274165	0.329907
384	0.0121818	0.252781	0.279075	0.100021		-0.0609022	0.158443	-0.0293937	0.330089
385	0.0127868	0.254034	0.278798	0.100357		-0.0608613	0.158128	-0.0313887	0.330274
386	0.0134219	0.255268	0.278517	0.100691		-0.0608255	0.157787	-0.0334001	0.330462
387	0.0140863	0.256483	0.278233	0.101024		-0.0607949	0.157421	-0.0354262	0.330652
388	0.0147792	0.257679	0.277946	0.101356		-0.0607698	0.157031	-0.0374658	0.330845
389	0.0154999	0.258855	0.277657	0.101687		-0.0607504	0.156617	-0.0395173	0.33104
390	0.0162475	0.260011	0.277369	0.102017		-0.0607369	0.156178	-0.0415793	0.331237
391	0.017021	0.261147	0.277081	0.102346		-0.0607294	0.155716	-0.0436505	0.331436
392	0.0178198	0.26226	0.276794	0.102675		-0.0607282	0.155229	-0.0457294	0.331635
393	0.0186429	0.263353	0.276511	0.103004		-0.0607333	0.154719	-0.0478148	0.331835
394	0.0194894	0.264423	0.276232	0.103334		-0.060745	0.154186	-0.0499052	0.332036
395	0.0203585	0.26547	0.275958	0.103663		-0.0607633	0.153631	-0.0519993	0.332237
396	0.021249	0.266495	0.275691	0.103994		-0.0607886	0.153053	-0.054096	0.332439
397	0.0221603	0.267496	0.275431	0.104326		-0.0608208	0.152453	-0.0561938	0.33264
398	0.0230912	0.268473	0.275181	0.104659		-0.0608601	0.151831	-0.0582917	0.33284
399	0.0240408	0.269427	0.27494	0.104995		-0.0609066	0.151189	-0.0603884	0.333039
400	0.0250082	0.270356	0.274711	0.105333		-0.0609605	0.150526	-0.0624827	0.333238
401	0.0259923	0.27126	0.274495	0.105674		-0.0610218	0.149843	-0.0645736	0.333435
402	0.026992	0.27214	0.274292	0.106018		-0.0610906	0.149142	-0.06666	0.333631
403	0.0280065	0.272994	0.274104	0.106366		-0.0611669	0.148421	-0.0687408	0.333825
404	0.0290346	0.273823	0.273933	0.106719		-0.0612508	0.147683	-0.070815	0.334017
405	0.0300754	0.274627	0.273779	0.107076		-0.0613424	0.146928	-0.0728816	0.334207
406	0.0311278	0.275405	0.273643	0.107439		-0.0614415	0.146156	-0.0749398	0.334395
407	0.0321907	0.276158	0.273526	0.107808		-0.0615483	0.145369	-0.0769886	0.33458
408	0.0332633	0.276884	0.27343	0.108183		-0.0616626	0.144566	-0.0790271	0.334762
409	0.0343443	0.277585	0.273355	0.108566		-0.0617846	0.14375	-0.0810546	0.334942
410	0.0354327	0.27826	0.273303	0.108956		-0.0619141	0.14292	-0.0830704	0.335118
411	0.0365276	0.278909	0.273273	0.109354		-0.0620512	0.142078	-0.0850736	0.335291
412	0.0376278	0.279533	0.273267	0.109761		-0.062196	0.141224	-0.0870636	0.335461
413	0.0387323	0.28013	0.273286	0.110177		-0.0623483	0.140359	-0.0890398	0.335628
414	0.0398402	0.280702	0.27333	0.110603		-0.0625083	0.139485	-0.0910015	0.335791
415	0.0409503	0.281248	0.2734	0.111039		-0.062676	0.138601	-0.0929482	0.33595
416	0.0420618	0.281769	0.273496	0.111486		-0.0628514	0.137709	-0.0948793	0.336106
417	0.0431735	0.282264	0.27362	0.111945		-0.0630346	0.136809	-0.0967942	0.336258
418	0.0442845	0.282735	0.273771	0.112415		-0.0632256	0.135902	-0.0986927	0.336406
419	0.0453938	0.283181	0.27395	0.112898		-0.0634245	0.13499	-0.100574	0.336551
420	0.0465004	0.283602	0.274158	0.113393		-0.0636313	0.134073	-0.102438	0.336692
421	0.0476035	0.283999	0.274394	0.113902		-0.063846	0.133151	-0.104285	0.33683
422	0.0487019	0.284373	0.274661	0.114424		-0.0640686	0.132227	-0.106114	0.336964
423	0.0497948	0.284723	0.274956	0.114959		-0.0642991	0.131299	-0.107925	0.337094
424	0.0508813	0.285051	0.275282	0.115509		-0.0645375	0.13037	-0.109718	0.337221
425	0.0519604	0.285355	0.275637	0.116074		-0.0647837	0.129441	-0.111493	0.337345
426	0.0530314	0.285638	0.276023	0.116653		-0.0650376	0.128511	-0.113249	0.337466
427	0.0540932	0.285899	0.27644	0.117247		-0.0652992	0.127582	-0.114987	0.337583
428	0.055145	0.286139	0.276887	0.117856		-0.0655683	0.126655	-0.116708	0.337698
429	0.0561861	0.286358	0.277364	0.11848		-0.0658449	0.125731	-0.11841	0.33781
430	0.0572154	0.286557	0.277872	0.11912		-0.0661287	0.124809	-0.120094	0.337919
431	0.0582323	0.286737	0.278411	0.119775		-0.0664197	0.123892	-0.121761	0.338026
432	0.0592357	0.286897	0.278979	0.120446		-0.0667176	0.12298	-0.123411	0.338131
433	0.060225	0.28704	0.279578	0.121132		-0.0670223	0.122073	-0.125043	0.338234
434	0.0611991	0.287164	0.280206	0.121834		-0.0673334	0.121173	-0.126659	0.338335
435	0.0621574	0.287271	0.280863	0.122551		-0.0676508	0.12028	-0.12826	0.338434
436	0.063099	0.287361	0.281549	0.123283		-0.0679741	0.119395	-0.129845	0.338532
437	0.064023	0.287435	0.282263	0.12403		-0.068303	0.118519	-0.131415	0.338629
438	0.0649286	0.287494	0.283005	0.124792		-0.0686373	0.117652	-0.132971	0.338726
439	0.0658149	0.287537	0.283774	0.125568		-0.0689765	0.116796	-0.134514	0.338821
440	0.066681	0.287567	0.284569	0.126359		-0.0693203	0.11595	-0.136044	0.338917
441	0.067526	0.287582	0.28539	0.127164		-0.0696684	0.115117	-0.137563	0.339013
442	0.068349	0.287585	0.286235	0.127982		-0.0700203	0.114296	-0.139071	0.339109
443	0.0691492	0.287575	0.287104	0.128813		-0.0703758	0.113488	-0.140568	0.339205
444	0.0699255	0.287553	0.287996	0.129657		-0.0707345	0.112693	-0.142057	0.339303
445	0.0706771	0.28752	0.288909	0.130513		-0.071096	0.111913	-0.143537	0.339402
446	0.0714032	0.287476	0.289843	0.131381		-0.07146	0.111148	-0.14501	0.339504
447	0.0721027	0.287421	0.290797	0.13226		-0.0718261	0.110399	-0.146476	0.339607
448	0.0727748	0.287357	0.291769	0.13315		-0.0721939	0.109666	-0.147938	0.339712
449	0.0734187	0.287284	0.292759	0.13405		-0.0725631	0.108949	-0.149395	0.339821
450	0.0740335	0.287202	0.293764	0.13496		-0.0729335	0.10825	-0.150849	0.339933
451	0.0746184	0.287113	0.294785	0.135879		-0.0733048	0.107568	-0.152301	0.340048
452	0.0751726	0.287015	0.29582	0.136806		-0.0736766	0.106904	-0.153751	0.340167
453	0.0756953	0.286911	0.296867	0.137741		-0.0740488	0.106259	-0.155202	0.340291
454	0.0761858	0.2868	0.297926	0.138683		-0.0744212	0.105632	-0.156654	0.34042
455	0.0766434	0.286683	0.298994	0.139632		-0.0747935	0.105025	-0.158107	0.340553
456	0.0770675	0.286561	0.300071	0.140588		-0.0751656	0.104438	-0.159564	0.340692
457	0.0774574	0.286434	0.301156	0.141548		-0.0755375	0.10387	-0.161024	0.340837
458	0.0778126	0.286303	0.302247	0.142514		-0.0759089	0.103322	-0.16249	0.340988
459	0.0781324	0.286167	0.303342	0.143484		-0.0762797	0.102794	-0.163961	0.341145
460	0.0784163	0.286028	0.304441	0.144458		-0.07665	0.102287	-0.165439	0.341309
461	0.0786638	0.285886	0.305542	0.145435		-0.0770194	0.101801	-0.166925	0.341479
462	0.0788744	0.285741	0.306644	0.146415		-0.0773879	0.101335	-0.16842	0.341657
463	0.0790477	0.285595	0.307745	0.147397		-0.0777554	0.10089	-0.169923	0.341842
464	0.0791833	0.285446	0.308844	0.148381		-0.0781217	0.100465	-0.171437	0.342035
465	0.0792808	0.285297	0.30994	0.149367		-0.0784868	0.100062	-0.172961	0.342236
466	0.07934	0.285146	0.311032	0.150353		-0.0788505	0.0996789	-0.174498	0.342444
467	0.0793607	0.284995	0.312118	0.151339		-0.0792126	0.0993166	-0.176046	0.342661
468	0.0793426	0.284844	0.313198	0.152325		-0.0795731	0.0989748	-0.177607	0.342886
469	0.0792855	0.284693	0.314269	0.15331		-0.0799319	0.0986533	-0.179182	0.343119
470	0.0791895	0.284543	0.315331	0.154295		-0.0802889	0.098352	-0.180771	0.343361
471	0.0790544	0.284395	0.316382	0.155277		-0.080644	0.0980706	-0.182375	0.343611
472	0.0788804	0.284247	0.317422	0.156258		-0.0809973	0.0978089	-0.183994	0.34387
473	0.0786673	0.284102	0.318449	0.157237		-0.0813487	0.0975666	-0.185628	0.344137
474	0.0784154	0.283959	0.319462	0.158212		-0.0816982	0.0973435	-0.187279	0.344412
475	0.0781247	0.283818	0.320459	0.159185		-0.0820458	0.0971393	-0.188947	0.344697
476	0.0777954	0.283681	0.321441	0.160154		-0.0823916	0.0969536	-0.190631	0.344989
477	0.0774278	0.283547	0.322405	0.161119		-0.0827355	0.0967863	-0.192332	0.345289
478	0.0770222	0.283416	0.323352	0.16208		-0.0830778	0.0966369	-0.194052	0.345598
479	0.0765787	0.283289	0.324278	0.163036		-0.0834182	0.0965052	-0.195789	0.345914
480	0.0760979	0.283167	0.325185	0.163987		-0.0837569	0.0963908	-0.197544	0.346238
481	0.0755801	0.283049	0.326071	0.164932		-0.084094	0.0962935	-0.199317	0.34657
482	0.0750258	0.282937	0.326934	0.165872		-0.0844293	0.096213	-0.201109	0.346908
483	0.0744355	0.282829	0.327775	0.166805		-0.084763	0.0961489	-0.202919	0.347254
484	0.0738097	0.282726	0.328592	0.167732		-0.0850949	0.0961011	-0.204748	0.347606
485	0.0731489	0.282629	0.329385	0.168652		-0.0854252	0.0960691	-0.206595	0.347965
486	0.0724539	0.282538	0.330152	0.169564		-0.0857537	0.0960529	-0.208461	0.34833
487	0.0717252	0.282453	0.330893	0.170469		-0.0860804	0.0960522	-0.210346	0.3487
488	0.0709635	0.282374	0.331607	0.171366		-0.0864053	0.0960667	-0.212249	0.349076
489	0.0701696	0.282301	0.332293	0.172254		-0.0867284	0.0960963	-0.214171	0.349458
490	0.0693441	0.282235	0.33295	0.173134		-0.0870495	0.0961408	-0.21611	0.349844
491	0.0684879	0.282175	0.333578	0.174004		-0.0873687	0.0962	-0.218068	0.350234
492	0.0676018	0.282122	0.334176	0.174865		-0.0876859	0.0962737	-0.220043	0.350629
493	0.0666865	0.282077	0.334743	0.175717		-0.088001	0.0963619	-0.222036	0.351027
494	0.0657429	0.282038	0.335278	0.176558		-0.088314	0.0964645	-0.224046	0.351428
495	0.0647718	0.282006	0.33578	0.177389		-0.0886248	0.0965812	-0.226072	0.351833
496	0.0637741	0.281982	0.33625	0.178209		-0.0889335	0.096712	-0.228115	0.35224
497	0.0627506	0.281965	0.336685	0.179018		-0.08924	0.0968569	-0.230173	0.352649
498	0.0617021	0.281955	0.337085	0.179816		-0.0895443	0.0970158	-0.232247	0.35306
499	0.0606295	0.281953	0.33745	0.180601		-0.0898466	0.0971887	-0.234335	0.353472
500	0.0595335	0.281958	0.337779	0.181374		-0.0901467	0.0973754	-0.236437	0.353885
501	0.058415	0.281971	0.338071	0.182135		-0.0904448	0.097576	-0.238552	0.354299
502	0.0572749	0.281991	0.338326	0.182882		-0.0907408	0.0977904	-0.24068	0.354713
503	0.0561139	0.282019	0.338542	0.183616		-0.0910347	0.0980187	-0.24282	0.355127
504	0.0549329	0.282055	0.338719	0.184336		-0.0913265	0.0982607	-0.244971	0.35554
505	0.0537328	0.282098	0.338856	0.185041		-0.0916162	0.0985165	-0.247132	0.355953
506	0.0525143	0.282149	0.338954	0.185732		-0.0919037	0.098786	-0.249302	0.356365
507	0.0512785	0.282207	0.33901	0.186408		-0.0921892	0.0990692	-0.251481	0.356775
508	0.0500261	0.282273	0.339025	0.187068		-0.0924725	0.099366	-0.253668	0.357184
509	0.0487581	0.282346	0.338997	0.187711		-0.0927536	0.0996764	-0.255862	0.357591
510	0.0474753	0.282426	0.338927	0.188339		-0.0930326	0.1	-0.258061	0.357996
511	0.0461786	0.282514	0.338813	0.188949		-0.0933094	0.100338	-0.260265	0.358398
512	0.0448688	0.282608	0.338656	0.189541		-0.0935842	0.100688	-0.262473	0.358798
513	0.0435469	0.282709	0.338454	0.190116		-0.0938569	0.101052	-0.264684	0.359195
514	0.0422137	0.282817	0.338207	0.190671		-0.0941276	0.101429	-0.266897	0.359589
515	0.0408701	0.282931	0.337914	0.191208		-0.0943965	0.10182	-0.269111	0.35998
516	0.039517	0.283051	0.337576	0.191725		-0.0946637	0.102222	-0.271325	0.360367
517	0.0381554	0.283176	0.337191	0.192222		-0.0949292	0.102638	-0.273538	0.360751
518	0.0367861	0.283307	0.336759	0.192699		-0.0951932	0.103066	-0.27575	0.361132
519	0.03541	0.283444	0.33628	0.193154		-0.0954558	0.103506	-0.277958	0.361509
520	0.0340279	0.283585	0.335754	0.193587		-0.0957173	0.103958	-0.280163	0.361883
521	0.0326407	0.28373	0.335179	0.193998		-0.0959777	0.104422	-0.282363	0.362253
522	0.0312493	0.283879	0.334556	0.194386		-0.0962372	0.104897	-0.284558	0.36262
523	0.0298545	0.284032	0.333884	0.194751		-0.0964961	0.105383	-0.286746	0.362983
524	0.0284572	0.284187	0.333164	0.195091		-0.0967545	0.10588	-0.288926	0.363343
525	0.0270582	0.284345	0.332394	0.195407		-0.0970127	0.106388	-0.291098	0.3637
526	0.0256585	0.284505	0.331575	0.195698		-0.0972709	0.106905	-0.29326	0.364053
527	0.0242588	0.284666	0.330706	0.195964		-0.0975294	0.107432	-0.295412	0.364402
528	0.0228601	0.284829	0.329789	0.196204		-0.0977885	0.107968	-0.297553	0.364749
529	0.0214632	0.284991	0.328821	0.196417		-0.0980485	0.108514	-0.299682	0.365092
530	0.020069	0.285154	0.327804	0.196603		-0.0983098	0.109067	-0.301797	0.365431
531	0.0186784	0.285315	0.326738	0.196763		-0.0985728	0.109629	-0.303899	0.365768
532	0.0172923	0.285476	0.325622	0.196895		-0.0988378	0.110198	-0.305985	0.366101
533	0.0159114	0.285634	0.324457	0.196999		-0.0991053	0.110775	-0.308056	0.36643
534	0.0145367	0.285791	0.323243	0.197074		-0.0993759	0.111358	-0.310109	0.366756
535	0.0131691	0.285944	0.321981	0.197121		-0.0996499	0.111947	-0.312145	0.367079
536	0.0118093	0.286094	0.32067	0.19714		-0.0999281	0.112541	-0.314163	0.367398
537	0.0104583	0.286241	0.31931	0.197129		-0.100211	0.113141	-0.31616	0.367713
538	0.00911699	0.286382	0.317904	0.197089		-0.100499	0.113746	-0.318138	0.368025
539	0.00778614	0.286519	0.31645	0.197019		-0.100792	0.114354	-0.320093	0.368333
540	0.00646665	0.286651	0.314949	0.19692		-0.101092	0.114966	-0.322027	0.368636
541	0.00515937	0.286777	0.313402	0.19679		-0.101399	0.115582	-0.323937	0.368936
542	0.00386516	0.286896	0.31181	0.196631		-0.101713	0.1162	-0.325823	0.369231
543	0.00258483	0.287009	0.310173	0.196442		-0.102035	0.11682	-0.327683	0.369522
544	0.00131923	0.287115	0.308491	0.196223		-0.102366	0.117442	-0.329518	0.369808
545	6.91592e-05	0.287213	0.306767	0.195973		-0.102706	0.118065	-0.331326	0.37009
546	-0.00116458	0.287303	0.304999	0.195694		-0.103056	0.11869	-0.333105	0.370367
547	-0.00238121	0.287385	0.30319	0.195385		-0.103416	0.119315	-0.334856	0.370638
548	-0.00357999	0.287458	0.301341	0.195046		-0.103788	0.11994	-0.336577	0.370904
549	-0.00476019	0.287522	0.299451	0.194678		-0.104171	0.120565	-0.338267	0.371165
550	-0.00592113	0.287578	0.297523	0.19428		-0.104566	0.12119	-0.339925	0.37142
551	-0.00706215	0.287623	0.295557	0.193853		-0.104974	0.121814	-0.34155	0.37167
552	-0.00818265	0.287659	0.293554	0.193398		-0.105396	0.122436	-0.343142	0.371913
553	-0.00928204	0.287684	0.291516	0.192915		-0.105832	0.123057	-0.344699	0.37215
554	-0.0103598	0.2877	0.289444	0.192404		-0.106284	0.123676	-0.34622	0.372381
555	-0.0114155	0.287705	0.28734	0.191865		-0.106751	0.124292	-0.347705	0.372605
556	-0.0124487	0.287699	0.285204	0.1913		-0.107234	0.124906	-0.349152	0.372822
557	-0.0134591	0.287682	0.283039	0.190709		-0.107735	0.125518	-0.350561	0.373032
558	-0.0144463	0.287654	0.280845	0.190093		-0.108253	0.126126	-0.35193	0.373235
559	-0.0154102	0.287615	0.278624	0.189451		-0.10879	0.126731	-0.353259	0.373431
560	-0.0163505	0.287565	0.276379	0.188786		-0.109347	0.127333	-0.354547	0.373619
561	-0.0172671	0.287504	0.274109	0.188097		-0.109923	0.127931	-0.355793	0.3738
562	-0.0181598	0.287431	0.271818	0.187386		-0.11052	0.128525	-0.356996	0.373972
563	-0.0190285	0.287346	0.269507	0.186653		-0.111138	0.129115	-0.358156	0.374136
564	-0.0198732	0.28725	0.267177	0.1859		-0.111778	0.1297	-0.359271	0.374293
565	-0.0206939	0.287143	0.26483	0.185126		-0.11244	0.130281	-0.360341	0.37444
566	-0.0214906	0.287024	0.262467	0.184334		-0.113125	0.130858	-0.361366	0.37458
567	-0.0222633	0.286893	0.26009	0.183523		-0.113833	0.131429	-0.362344	0.37471
568	-0.0230121	0.286751	0.257702	0.182696		-0.114564	0.131996	-0.363275	0.374832
569	-0.0237371	0.286598	0.255302	0.181853		-0.11532	0.132557	-0.364159	0.374944
570	-0.0244384	0.286433	0.252894	0.180994		-0.1161	0.133113	-0.364993	0.375048
571	-0.0251163	0.286256	0.250477	0.180122		-0.116905	0.133664	-0.365779	0.375142
572	-0.0257708	0.286069	0.248055	0.179236		-0.117735	0.134209	-0.366515	0.375226
573	-0.0264022	0.285869	0.245628	0.178339		-0.118589	0.134749	-0.3672	0.375302
574	-0.0270107	0.285659	0.243198	0.17743		-0.119469	0.135282	-0.367835	0.375367
575	-0.0275967	0.285437	0.240766	0.176512		-0.120374	0.135811	-0.368419	0.375423
576	-0.0281603	0.285204	0.238335	0.175585		-0.121303	0.136333	-0.368951	0.375468
577	-0.0287021	0.28496	0.235904	0.17465		-0.122258	0.13685	-0.369431	0.375504
578	-0.0292223	0.284705	0.233475	0.173709		-0.123238	0.137361	-0.369858	0.37553
579	-0.0297212	0.284439	0.231051	0.172761		-0.124243	0.137866	-0.370233	0.375545
580	-0.0301995	0.284161	0.228631	0.171809		-0.125272	0.138366	-0.370554	0.375551
581	-0.0306574	0.283873	0.226218	0.170854		-0.126325	0.13886	-0.370823	0.375546
582	-0.0310956	0.283573	0.223812	0.169895		-0.127403	0.139349	-0.371038	0.375531
583	-0.0315144	0.283263	0.221414	0.168935		-0.128503	0.139832	-0.371199	0.375506
584	-0.0319144	0.282942	0.219026	0.167975		-0.129627	0.14031	-0.371306	0.375471
585	-0.0322962	0.28261	0.216648	0.167014		-0.130773	0.140783	-0.37136	0.375426
586	-0.0326604	0.282267	0.214282	0.166055		-0.131941	0.141252	-0.37136	0.37537
587	-0.0330077	0.281915	0.211929	0.165097		-0.13313	0.141715	-0.371307	0.375305
588	-0.0333386	0.281551	0.209589	0.164143		-0.13434	0.142174	-0.3712	0.375229
589	-0.0336539	0.281178	0.207264	0.163192		-0.13557	0.142629	-0.371039	0.375143
590	-0.0339543	0.280794	0.204954	0.162246		-0.13682	0.14308	-0.370826	0.375048
591	-0.0342404	0.280401	0.20266	0.161305		-0.138088	0.143526	-0.37056	0.374943
592	-0.0345129	0.279997	0.200383	0.160371		-0.139374	0.143969	-0.370241	0.374828
593	-0.0347726	0.279584	0.198123	0.159443		-0.140678	0.144409	-0.369871	0.374703
594	-0.0350203	0.279162	0.195882	0.158523		-0.141998	0.144845	-0.369449	0.374569
595	-0.0352567	0.27873	0.19366	0.157611		-0.143334	0.145278	-0.368977	0.374426
596	-0.0354825	0.278289	0.191458	0.156708		-0.144685	0.145707	-0.368455	0.374273
597	-0.0356986	0.277838	0.189277	0.155814		-0.146051	0.146134	-0.367883	0.374112
598	-0.0359058	0.277379	0.187116	0.15493		-0.14743	0.146558	-0.367263	0.373942
599	-0.0361048	0.276911	0.184978	0.154057		-0.148822	0.146979	-0.366595	0.373763
600	-0.0362964	0.276433	0.182862	0.153194		-0.150226	0.147398	-0.36588	0.373575
601	-0.0364814	0.275948	0.180768	0.152342		-0.151642	0.147814	-0.365119	0.37338
602	-0.0366607	0.275454	0.178699	0.151502		-0.153068	0.148227	-0.364314	0.373176
603	-0.0368349	0.274951	0.176653	0.150673		-0.154504	0.148638	-0.363464	0.372964
604	-0.0370049	0.27444	0.174632	0.149856		-0.155948	0.149047	-0.362572	0.372745
605	-0.0371715	0.273921	0.172637	0.149052		-0.157401	0.149453	-0.361638	0.372518
606	-0.0373355	0.273394	0.170667	0.148259		-0.158861	0.149856	-0.360663	0.372284
607	-0.0374976	0.27286	0.168724	0.147479		-0.160327	0.150257	-0.359648	0.372042
608	-0.0376586	0.272317	0.166807	0.146712		-0.161799	0.150655	-0.358595	0.371794
609	-0.0378194	0.271767	0.164918	0.145956		-0.163276	0.151049	-0.357504	0.371538
610	-0.0379807	0.271209	0.163056	0.145214		-0.164757	0.151441	-0.356378	0.371276
611	-0.0381434	0.270643	0.161223	0.144483		-0.166241	0.151829	-0.355216	0.371008
612	-0.0383081	0.27007	0.159418	0.143765		-0.167727	0.152214	-0.35402	0.370733
613	-0.0384757	0.26949	0.157642	0.14306		-0.169215	0.152594	-0.352792	0.370452
614	-0.0386469	0.268903	0.155895	0.142366		-0.170704	0.152971	-0.351532	0.370165
615	-0.0388224	0.268309	0.154177	0.141685		-0.172193	0.153343	-0.350242	0.369872
616	-0.0390029	0.267708	0.152489	0.141015		-0.173682	0.15371	-0.348923	0.369572
617	-0.0391891	0.2671	0.150831	0.140357		-0.175169	0.154073	-0.347577	0.369267
618	-0.0393817	0.266486	0.149202	0.13971		-0.176655	0.15443	-0.346204	0.368956
619	-0.0395813	0.265866	0.147604	0.139075		-0.178138	0.154782	-0.344806	0.36864
620	-0.0397884	0.265239	0.146036	0.138451		-0.179618	0.155128	-0.343384	0.368317
621	-0.0400037	0.264605	0.144497	0.137837		-0.181095	0.155467	-0.34194	0.36799
622	-0.0402278	0.263966	0.142989	0.137234		-0.182567	0.155801	-0.340475	0.367656
623	-0.040461	0.263321	0.141511	0.136641		-0.184034	0.156127	-0.338991	0.367317
624	-0.040704	0.262671	0.140063	0.136057		-0.185495	0.156446	-0.337488	0.366973
625	-0.0409571	0.262014	0.138645	0.135483		-0.186951	0.156758	-0.335969	0.366623
626	-0.0412207	0.261352	0.137256	0.134918		-0.1884	0.157061	-0.334434	0.366268
627	-0.0414952	0.260685	0.135897	0.134362		-0.189841	0.157357	-0.332885	0.365908
628	-0.0417808	0.260013	0.134567	0.133814		-0.191275	0.157644	-0.331325	0.365542
629	-0.0420778	0.259336	0.133266	0.133274		-0.1927	0.157922	-0.329753	0.365171
630	-0.0423862	0.258654	0.131993	0.132741		-0.194116	0.158191	-0.328172	0.364794
631	-0.0427063	0.257968	0.130749	0.132216		-0.195523	0.158451	-0.326584	0.364413
632	-0.0430379	0.257277	0.129532	0.131696		-0.196921	0.158701	-0.32499	0.364026
633	-0.0433809	0.256582	0.128342	0.131183		-0.198308	0.158941	-0.323391	0.363634
634	-0.0437352	0.255884	0.12718	0.130675		-0.199684	0.15917	-0.321789	0.363237
635	-0.0441006	0.255182	0.126043	0.130172		-0.20105	0.159389	-0.320185	0.362835
636	-0.0444768	0.254477	0.124932	0.129674		-0.202404	0.159598	-0.318581	0.362427
637	-0.0448634	0.253769	0.123845	0.12918		-0.203746	0.159796	-0.316979	0.362015
638	-0.04526	0.253058	0.122783	0.128689		-0.205076	0.159982	-0.31538	0.361597
639	-0.0456661	0.252346	0.121744	0.128201		-0.206394	0.160158	-0.313785	0.361175
640	-0.0460813	0.251632	0.120728	0.127716		-0.207698	0.160322	-0.312195	0.360748
641	-0.0465048	0.250916	0.119733	0.127233		-0.20899	0.160474	-0.310613	0.360316
642	-0.0469362	0.250199	0.11876	0.126751		-0.210269	0.160615	-0.309039	0.359879
643	-0.0473746	0.249482	0.117807	0.126271		-0.211534	0.160744	-0.307475	0.359438
644	-0.0478195	0.248765	0.116873	0.12579		-0.212785	0.160862	-0.305922	0.358992
645	-0.04827	0.248049	0.115957	0.12531		-0.214022	0.160967	-0.304381	0.358542
646	-0.0487253	0.247333	0.11506	0.12483		-0.215244	0.161061	-0.302853	0.358087
647	-0.0491847	0.246619	0.114179	0.124348		-0.216453	0.161143	-0.30134	0.357628
648	-0.0496473	0.245906	0.113314	0.123865		-0.217647	0.161213	-0.299843	0.357164
649	-0.0501123	0.245196	0.112464	0.12338		-0.218826	0.161271	-0.298363	0.356697
650	-0.0505789	0.244489	0.111628	0.122894		-0.21999	0.161317	-0.296901	0.356225
651	-0.0510463	0.243784	0.110806	0.122404		-0.221139	0.161351	-0.295458	0.35575
652	-0.0515135	0.243084	0.109997	0.121912		-0.222273	0.161373	-0.294034	0.355271
653	-0.0519797	0.242387	0.109199	0.121417		-0.223392	0.161383	-0.292632	0.354788
654	-0.0524441	0.241696	0.108412	0.120918		-0.224496	0.161382	-0.291251	0.354301
655	-0.0529057	0.241009	0.107635	0.120415		-0.225585	0.161369	-0.289894	0.353811
656	-0.0533636	0.240328	0.106868	0.119908		-0.226658	0.161344	-0.288559	0.353319
657	-0.0538168	0.239653	0.106109	0.119397		-0.227716	0.161308	-0.287249	0.352823
658	-0.0542646	0.238985	0.105357	0.118882		-0.228759	0.16126	-0.285965	0.352324
659	-0.0547059	0.238324	0.104613	0.118363		-0.229786	0.161201	-0.284705	0.351822
660	-0.0551398	0.23767	0.103874	0.11784		-0.230797	0.161131	-0.283473	0.351318
661	-0.0555654	0.237023	0.103142	0.117312		-0.231793	0.16105	-0.282267	0.350812
662	-0.0559819	0.236385	0.102413	0.11678		-0.232773	0.160958	-0.28109	0.350304
663	-0.0563884	0.235756	0.101689	0.116244		-0.233737	0.160856	-0.27994	0.349794
664	-0.0567841	0.235136	0.100968	0.115703		-0.234685	0.160743	-0.278819	0.349282
665	-0.0571682	0.234525	0.10025	0.11516		-0.235617	0.16062	-0.277728	0.348769
666	-0.0575398	0.233924	0.0995344	0.114612		-0.236533	0.160486	-0.276666	0.348254
667	-0.0578981	0.233333	0.0988198	0.114062		-0.237434	0.160343	-0.275635	0.347739
668	-0.0582425	0.232753	0.0981058	0.113509		-0.238318	0.160191	-0.274634	0.347223
669	-0.058572	0.232184	0.0973917	0.112953		-0.239186	0.160029	-0.273664	0.346706
670	-0.058886	0.231626	0.096677	0.112396		-0.240038	0.159857	-0.272726	0.346188
671	-0.0591836	0.23108	0.0959608	0.111837		-0.240875	0.159678	-0.271819	0.345671
672	-0.0594643	0.230546	0.0952424	0.111278		-0.241695	0.159489	-0.270944	0.345154
673	-0.0597272	0.230024	0.0945211	0.110718		-0.242499	0.159292	-0.270101	0.344637
674	-0.0599718	0.229514	0.0937961	0.110159		-0.243287	0.159087	-0.26929	0.34412
675	-0.0601974	0.229018	0.0930668	0.1096		-0.24406	0.158874	-0.268512	0.343604
676	-0.0604034	0.228535	0.0923324	0.109044		-0.244816	0.158654	-0.267767	0.343089
677	-0.0605894	0.228065	0.091592	0.108491		-0.245556	0.158426	-0.267054	0.342576
678	-0.0607546	0.227608	0.0908449	0.107941		-0.246279	0.15819	-0.266374	0.342064
679	-0.0608989	0.227165	0.0900904	0.107395		-0.246987	0.157948	-0.265727	0.341554
680	-0.0610216	0.226736	0.0893275	0.106855		-0.247678	0.157698	-0.265113	0.341045
681	-0.0611226	0.226321	0.0885556	0.106321		-0.248353	0.157442	-0.264532	0.340539
682	-0.0612014	0.22592	0.0877738	0.105794		-0.249011	0.157179	-0.263984	0.340036
683	-0.061258	0.225533	0.0869814	0.105275		-0.249652	0.156909	-0.263468	0.339535
684	-0.061292	0.22516	0.0861776	0.104765		-0.250277	0.156633	-0.262985	0.339038
685	-0.0613033	0.224802	0.0853617	0.104265		-0.250886	0.156351	-0.262535	0.338544
686	-0.0612919	0.224457	0.0845331	0.103776		-0.251477	0.156063	-0.262117	0.338053
687	-0.0612577	0.224127	0.0836909	0.103298		-0.252052	0.155768	-0.261731	0.337567
688	-0.0612007	0.223811	0.0828347	0.102833		-0.252609	0.155468	-0.261377	0.337084
689	-0.0611209	0.223508	0.0819637	0.102382		-0.25315	0.155162	-0.261054	0.336606
690	-0.0610182	0.22322	0.0810775	0.101946		-0.253674	0.154849	-0.260762	0.336133
691	-0.0608929	0.222945	0.0801755	0.101524		-0.254181	0.154532	-0.260502	0.335665
692	-0.060745	0.222684	0.0792571	0.101119		-0.254671	0.154208	-0.260271	0.335202
693	-0.0605747	0.222437	0.078322	0.10073		-0.255144	0.153879	-0.260072	0.334744
694	-0.0603822	0.222203	0.0773696	0.100359		-0.255599	0.153544	-0.259901	0.334292
695	-0.0601676	0.221982	0.0763998	0.100006		-0.256038	0.153204	-0.259761	0.333847
696	-0.0599312	0.221774	0.0754121	0.0996723		-0.25646	0.152858	-0.259649	0.333407
697	-0.0596733	0.221579	0.0744063	0.0993578		-0.256865	0.152507	-0.259567	0.332974
698	-0.059394	0.221397	0.0733822	0.0990634		-0.257253	0.15215	-0.259512	0.332547
699	-0.0590937	0.221227	0.0723397	0.0987895		-0.257623	0.151787	-0.259486	0.332128
700	-0.0587726	0.221069	0.0712786	0.0985366		-0.257977	0.15142	-0.259487	0.331715
701	-0.058431	0.220923	0.0701989	0.098305		-0.258313	0.151047	-0.259515	0.33131
702	-0.0580691	0.220788	0.0691006	0.0980952		-0.258632	0.150669	-0.259571	0.330913
703	-0.0576873	0.220665	0.0679837	0.0979074		-0.258933	0.150286	-0.259652	0.330523
704	-0.0572858	0.220552	0.0668484	0.0977419		-0.259218	0.149898	-0.259759	0.330142
705	-0.056865	0.22045	0.0656947	0.0975989		-0.259484	0.149505	-0.259892	0.329768
706	-0.0564251	0.220359	0.064523	0.0974784		-0.259733	0.149107	-0.26005	0.329404
707	-0.0559664	0.220277	0.0633333	0.0973807		-0.259964	0.148704	-0.260232	0.329047
708	-0.0554893	0.220205	0.0621259	0.0973057		-0.260177	0.148297	-0.260439	0.3287
709	-0.0549939	0.220143	0.0609013	0.0972534		-0.260372	0.147885	-0.260669	0.328361
710	-0.0544807	0.220089	0.0596596	0.0972237		-0.26055	0.147469	-0.260922	0.328032
711	-0.0539498	0.220044	0.0584014	0.0972164		-0.260708	0.147049	-0.261197	0.327712
712	-0.0534015	0.220007	0.057127	0.0972314		-0.260849	0.146625	-0.261495	0.327401
713	-0.0528362	0.219979	0.0558371	0.0972684		-0.260971	0.146197	-0.261813	0.3271
714	-0.0522541	0.219957	0.0545321	0.0973271		-0.261075	0.145765	-0.262152	0.326808
715	-0.0516554	0.219943	0.0532128	0.097407		-0.26116	0.14533	-0.262512	0.326526
716	-0.0510406	0.219936	0.0518797	0.0975078		-0.261227	0.144891	-0.26289	0.326254
717	-0.0504099	0.219935	0.0505337	0.0976289		-0.261275	0.14445	-0.263287	0.325992
718	-0.0497635	0.21994	0.0491756	0.0977699		-0.261305	0.144005	-0.263701	0.325739
719	-0.0491017	0.21995	0.0478062	0.0979301		-0.261316	0.143558	-0.264132	0.325496
720	-0.0484248	0.219966	0.0464265	0.098109		-0.261308	0.143109	-0.26458	0.325263
721	-0.047733	0.219986	0.0450375	0.0983059		-0.261281	0.142658	-0.265042	0.32504
722	-0.0470266	0.220011	0.0436404	0.0985202		-0.261235	0.142205	-0.265519	0.324826
723	-0.0463059	0.22004	0.0422361	0.0987511		-0.26117	0.14175	-0.266009	0.324622
724	-0.045571	0.220073	0.0408259	0.098998		-0.261087	0.141295	-0.266512	0.324427
725	-0.0448224	0.220109	0.0394111	0.0992602		-0.260984	0.140839	-0.267026	0.324242
726	-0.0440603	0.220148	0.0379928	0.0995369		-0.260862	0.140383	-0.26755	0.324067
727	-0.0432849	0.22019	0.0365725	0.0998273		-0.26072	0.139927	-0.268083	0.3239
728	-0.0424965	0.220234	0.0351515	0.100131		-0.260559	0.139472	-0.268625	0.323743
729	-0.0416954	0.22028	0.0337313	0.100446		-0.260379	0.139017	-0.269173	0.323595
730	-0.0408819	0.220327	0.0323134	0.100773		-0.260179	0.138564	-0.269727	0.323456
731	-0.0400561	0.220375	0.0308992	0.101111		-0.259959	0.138112	-0.270286	0.323326
732	-0.0392184	0.220425	0.0294904	0.101459		-0.259719	0.137663	-0.270848	0.323204
733	-0.038369	0.220475	0.0280886	0.101816		-0.259459	0.137217	-0.271413	0.323091
734	-0.037508	0.220525	0.0266954	0.102181		-0.259179	0.136773	-0.271978	0.322987
735	-0.0366357	0.220575	0.0253125	0.102554		-0.258879	0.136334	-0.272543	0.322891
736	-0.0357523	0.220625	0.0239416	0.102934		-0.258558	0.135898	-0.273107	0.322803
737	-0.034858	0.220674	0.0225843	0.10332		-0.258215	0.135468	-0.273668	0.322724
738	-0.0339531	0.220723	0.0212423	0.103711		-0.257852	0.135042	-0.274226	0.322652
739	-0.0330378	0.22077	0.0199174	0.104108		-0.257466	0.134622	-0.274778	0.322588
740	-0.0321123	0.220816	0.0186112	0.104509		-0.257059	0.134209	-0.275324	0.322532
741	-0.0311768	0.220861	0.0173253	0.104913		-0.25663	0.133802	-0.275864	0.322483
742	-0.0302315	0.220904	0.0160614	0.105321		-0.256177	0.133403	-0.276395	0.322441
743	-0.0292767	0.220946	0.014821	0.105732		-0.255702	0.133011	-0.276916	0.322406
744	-0.0283126	0.220986	0.0136058	0.106144		-0.255203	0.132628	-0.277427	0.322378
745	-0.0273394	0.221024	0.0124171	0.106558		-0.254681	0.132254	-0.277927	0.322356
746	-0.0263573	0.22106	0.0112564	0.106974		-0.254134	0.131889	-0.278414	0.322341
747	-0.0253665	0.221094	0.010125	0.10739		-0.253562	0.131535	-0.278887	0.322331
748	-0.0243671	0.221125	0.00902434	0.107806		-0.252965	0.131191	-0.279345	0.322328
749	-0.0233593	0.221154	0.00795553	0.108223		-0.252343	0.130858	-0.279787	0.32233
750	-0.0223434	0.221181	0.0069198	0.108639		-0.251695	0.130537	-0.280212	0.322337
751	-0.0213192	0.221206	0.00591828	0.109055		-0.251021	0.130228	-0.280619	0.32235
752	-0.0202871	0.221228	0.00495201	0.109469		-0.25032	0.129932	-0.281007	0.322367
753	-0.019247	0.221248	0.004022	0.109883		-0.249592	0.129649	-0.281375	0.322388
754	-0.018199	0.221266	0.00312916	0.110294		-0.248836	0.12938	-0.281721	0.322414
755	-0.0171431	0.221281	0.00227437	0.110705		-0.248053	0.129125	-0.282045	0.322444
756	-0.0160793	0.221293	0.00145841	0.111113		-0.247242	0.128884	-0.282346	0.322477
757	-0.0150078	0.221304	0.000682012	0.111519		-0.246403	0.128658	-0.282622	0.322514
758	-0.0139285	0.221312	-5.41969e-05	0.111923		-0.245536	0.128448	-0.282874	0.322555
759	-0.0128415	0.221318	-0.000749648	0.112325		-0.244639	0.128253	-0.283099	0.322598
760	-0.0117467	0.221321	-0.00140385	0.112725		-0.243714	0.128074	-0.283298	0.322644
761	-0.0106444	0.221323	-0.00201636	0.113122		-0.24276	0.127911	-0.28347	0.322693
762	-0.00953448	0.221323	-0.00258683	0.113517		-0.241777	0.127764	-0.283613	0.322743
763	-0.00841705	0.22132	-0.00311497	0.113909		-0.240765	0.127634	-0.283727	0.322796
764	-0.00729218	0.221317	-0.00360054	0.114299		-0.239724	0.127521	-0.283811	0.322851
765	-0.00615995	0.221311	-0.00404341	0.114687		-0.238655	0.127423	-0.283866	0.322907
766	-0.00502041	0.221304	-0.0044435	0.115072		-0.237556	0.127343	-0.283889	0.322965
767	-0.00387361	0.221296	-0.00480082	0.115455		-0.23643	0.127278	-0.283882	0.323024
768	-0.00271963	0.221287	-0.00511545	0.115835		-0.235275	0.127231	-0.283843	0.323084
769	-0.00155851	0.221278	-0.00538751	0.116214		-0.234092	0.127199	-0.283771	0.323144
770	-0.000390314	0.221267	-0.00561722	0.11659		-0.232881	0.127183	-0.283668	0.323205
771	0.000784877	0.221256	-0.00580483	0.116964		-0.231644	0.127183	-0.283532	0.323267
772	0.00196698	0.221245	-0.00595066	0.117337		-0.23038	0.127199	-0.283364	0.323329
773	0.00315591	0.221234	-0.00605507	0.117707		-0.22909	0.127229	-0.283163	0.32339
774	0.00435158	0.221222	-0.00611851	0.118075		-0.227775	0.127275	-0.282929	0.323452
775	0.00555388	0.221211	-0.00614144	0.118441		-0.226435	0.127334	-0.282662	0.323513
776	0.00676273	0.221201	-0.00612442	0.118806		-0.225071	0.127408	-0.282363	0.323574
777	0.00797804	0.221191	-0.00606805	0.119168		-0.223684	0.127495	-0.282031	0.323634
778	0.00919972	0.221182	-0.00597299	0.119529		-0.222275	0.127594	-0.281667	0.323694
779	0.0104277	0.221174	-0.00583996	0.119888		-0.220845	0.127706	-0.28127	0.323753
780	0.0116618	0.221168	-0.00566972	0.120245		-0.219394	0.127829	-0.280842	0.323812
781	0.0129019	0.221163	-0.00546308	0.120601		-0.217925	0.127964	-0.280382	0.323869
782	0.014148	0.221159	-0.00522091	0.120955		-0.216438	0.128108	-0.27989	0.323925
783	0.0153999	0.221157	-0.00494413	0.121306		-0.214934	0.128262	-0.279367	0.323981
784	0.0166574	0.221157	-0.00463368	0.121657		-0.213415	0.128425	-0.278814	0.324035
785	0.0179205	0.221159	-0.00429056	0.122005		-0.211882	0.128597	-0.278231	0.324089
786	0.0191888	0.221163	-0.00391579	0.122351		-0.210336	0.128775	-0.277618	0.324141
787	0.0204624	0.22117	-0.00351043	0.122696		-0.208779	0.12896	-0.276976	0.324192
788	0.0217409	0.221178	-0.00307554	0.123038		-0.207212	0.129151	-0.276306	0.324242
789	0.0230241	0.221189	-0.0026122	0.123379		-0.205636	0.129347	-0.275608	0.324291
790	0.024312	0.221203	-0.00212151	0.123718		-0.204053	0.129548	-0.274883	0.324338
791	0.0256043	0.221219	-0.00160455	0.124055		-0.202464	0.129751	-0.274132	0.324385
792	0.0269008	0.221237	-0.00106244	0.124389		-0.200871	0.129958	-0.273355	0.32443
793	0.0282013	0.221258	-0.000496264	0.124722		-0.199275	0.130166	-0.272553	0.324473
794	0.0295057	0.221282	9.28543e-05	0.125053		-0.197678	0.130375	-0.271727	0.324515
795	0.0308136	0.221308	0.000703798	0.125381		-0.19608	0.130584	-0.270878	0.324556
796	0.032125	0.221336	0.00133544	0.125708		-0.194484	0.130793	-0.270007	0.324596
797	0.0334396	0.221368	0.00198665	0.126033		-0.192891	0.131001	-0.269115	0.324634
798	0.0347571	0.221401	0.0026563	0.126355		-0.191301	0.131207	-0.268201	0.32467
799	0.0360775	0.221438	0.00334328	0.126676		-0.189717	0.131409	-0.267268	0.324705
800	0.0374005	0.221477	0.00404647	0.126994		-0.188139	0.131609	-0.266316	0.324738
801	0.0387259	0.221518	0.00476476	0.127311		-0.18657	0.131804	-0.265347	0.32477
802	0.0400534	0.221562	0.00549705	0.127625		-0.185009	0.131994	-0.26436	0.3248
803	0.0413829	0.221609	0.00624223	0.127938		-0.183459	0.132179	-0.263356	0.324829
804	0.0427141	0.221658	0.00699921	0.128248		-0.181921	0.132358	-0.262337	0.324855
805	0.0440467	0.221711	0.0077669	0.128557		-0.180397	0.132531	-0.261304	0.32488
806	0.0453806	0.221766	0.00854424	0.128864		-0.178886	0.132696	-0.260257	0.324903
807	0.0467155	0.221824	0.00933017	0.129168		-0.177391	0.132855	-0.259198	0.324924
808	0.0480511	0.221885	0.0101237	0.129472		-0.175913	0.133006	-0.258127	0.324944
809	0.0493871	0.221949	0.0109237	0.129773		-0.174452	0.133149	-0.257045	0.324961
810	0.0507232	0.222017	0.0117294	0.130072		-0.173011	0.133283	-0.255953	0.324976
811	0.0520593	0.222087	0.0125397	0.13037		-0.171591	0.13341	-0.254852	0.324989
812	0.0533948	0.222162	0.0133537	0.130666		-0.170192	0.133528	-0.253743	0.325001
813	0.0547296	0.22224	0.0141707	0.130961		-0.168816	0.133637	-0.252627	0.32501
814	0.0560633	0.222322	0.0149898	0.131254		-0.167464	0.133738	-0.251505	0.325016
815	0.0573956	0.222408	0.0158102	0.131546		-0.166138	0.13383	-0.250378	0.325021
816	0.0587262	0.222498	0.0166314	0.131837		-0.164838	0.133913	-0.249246	0.325024
817	0.0600547	0.222592	0.0174525	0.132126		-0.163566	0.133989	-0.248111	0.325024
818	0.0613809	0.22269	0.0182731	0.132415		-0.162323	0.134056	-0.246973	0.325022
819	0.0627044	0.222794	0.0190926	0.132703		-0.16111	0.134114	-0.245834	0.325018
820	0.0640249	0.222901	0.0199102	0.13299		-0.159929	0.134166	-0.244694	0.325012
821	0.065342	0.223014	0.0207257	0.133277		-0.158779	0.13421	-0.243554	0.325003
822	0.0666554	0.223132	0.0215384	0.133564		-0.157663	0.134247	-0.242416	0.324993
823	0.0679649	0.223254	0.022348	0.13385		-0.156581	0.134277	-0.241279	0.32498
824	0.06927	0.223382	0.0231539	0.134138		-0.155535	0.134302	-0.240144	0.324965
825	0.0705704	0.223515	0.0239557	0.134426		-0.154524	0.13432	-0.239013	0.324948
826	0.0718658	0.223653	0.0247531	0.134715		-0.153551	0.134334	-0.237886	0.324928
827	0.0731559	0.223796	0.0255458	0.135005		-0.152616	0.134343	-0.236764	0.324906
828	0.0744402	0.223946	0.0263334	0.135297		-0.15172	0.134349	-0.235648	0.324882
829	0.0757185	0.2241	0.0271155	0.135591		-0.150863	0.134351	-0.234538	0.324856
830	0.0769904	0.224261	0.0278919	0.135888		-0.150048	0.134351	-0.233436	0.324827
831	0.0782556	0.224427	0.0286624	0.136187		-0.149273	0.134348	-0.232341	0.324796
832	0.0795138	0.224599	0.0294266	0.13649		-0.148541	0.134345	-0.231255	0.324763
833	0.0807647	0.224776	0.0301843	0.136797		-0.147852	0.134341	-0.230179	0.324727
834	0.082008	0.22496	0.0309353	0.137108		-0.147206	0.134336	-0.229112	0.324689
835	0.0832434	0.225149	0.0316795	0.137423		-0.146604	0.134333	-0.228056	0.324648
836	0.0844706	0.225344	0.0324166	0.137744		-0.146046	0.134331	-0.227012	0.324605
837	0.0856894	0.225545	0.0331465	0.138071		-0.145534	0.134332	-0.22598	0.32456
838	0.0868997	0.225751	0.033869	0.138404		-0.145066	0.134335	-0.22496	0.324512
839	0.088101	0.225963	0.0345839	0.138743		-0.144644	0.134342	-0.223954	0.324463
840	0.0892934	0.226181	0.0352912	0.13909		-0.144268	0.134353	-0.222962	0.32441
841	0.0904767	0.226404	0.0359907	0.139444		-0.143938	0.13437	-0.221984	0.324356
842	0.0916507	0.226633	0.0366822	0.139806		-0.143655	0.134392	-0.221022	0.324299
843	0.0928153	0.226867	0.0373656	0.140176		-0.143417	0.13442	-0.220076	0.324241
844	0.0939705	0.227107	0.0380409	0.140555		-0.143226	0.134456	-0.219146	0.32418
845	0.095116	0.227352	0.0387079	0.140943		-0.143082	0.1345	-0.218233	0.324117
846	0.0962518	0.227602	0.0393665	0.141341		-0.142983	0.134553	-0.217338	0.324052
847	0.0973777	0.227857	0.0400165	0.141748		-0.142931	0.134614	-0.216462	0.323986
848	0.0984938	0.228118	0.0406579	0.142165		-0.142926	0.134685	-0.215604	0.323917
849	0.0995998	0.228383	0.0412906	0.142593		-0.142966	0.134767	-0.214766	0.323847
850	0.100696	0.228653	0.0419145	0.143031		-0.143052	0.134859	-0.213948	0.323775
851	0.101781	0.228927	0.0425293	0.14348		-0.143184	0.134963	-0.21315	0.323702
852	0.102857	0.229206	0.043135	0.14394		-0.143362	0.135078	-0.212374	0.323627
853	0.103921	0.229489	0.0437314	0.144411		-0.143584	0.135206	-0.211619	0.32355
854	0.104976	0.229777	0.0443184	0.144893		-0.143852	0.135346	-0.210886	0.323472
855	0.106019	0.230068	0.0448958	0.145386		-0.144164	0.135499	-0.210175	0.323393
856	0.107051	0.230363	0.0454634	0.145891		-0.144521	0.135665	-0.209487	0.323313
857	0.108073	0.230661	0.0460208	0.146406		-0.144921	0.135845	-0.208823	0.323231
858	0.109083	0.230963	0.046568	0.146933		-0.145365	0.136039	-0.208182	0.323149
859	0.110081	0.231267	0.0471047	0.147471		-0.145851	0.136247	-0.207565	0.323066
860	0.111067	0.231575	0.0476305	0.148019		-0.146381	0.136468	-0.206972	0.322981
861	0.112042	0.231885	0.0481453	0.148579		-0.146952	0.136704	-0.206403	0.322897
862	0.113004	0.232197	0.0486487	0.149148		-0.147565	0.136954	-0.205858	0.322811
863	0.113953	0.232511	0.0491405	0.149728		-0.148219	0.137219	-0.205337	0.322725
864	0.114889	0.232826	0.0496205	0.150318		-0.148913	0.137498	-0.204841	0.322639
865	0.115812	0.233143	0.0500882	0.150918		-0.149647	0.137792	-0.20437	0.322553
866	0.116721	0.23346	0.0505435	0.151527		-0.150419	0.1381	-0.203922	0.322467
867	0.117616	0.233778	0.0509862	0.152145		-0.151229	0.138422	-0.203499	0.322382
868	0.118497	0.234096	0.0514161	0.152771		-0.152076	0.138758	-0.2031	0.322296
869	0.119364	0.234414	0.0518328	0.153405		-0.152958	0.139109	-0.202725	0.322211
870	0.120215	0.234731	0.0522363	0.154047		-0.153876	0.139474	-0.202374	0.322127
871	0.121051	0.235047	0.0526264	0.154697		-0.154827	0.139853	-0.202045	0.322044
872	0.121871	0.235361	0.0530028	0.155352		-0.155811	0.140246	-0.20174	0.321961
873	0.122675	0.235673	0.0533655	0.156014		-0.156827	0.140652	-0.201457	0.32188
874	0.123462	0.235982	0.0537143	0.156682		-0.157873	0.141072	-0.201197	0.321801
875	0.124233	0.236289	0.0540493	0.157354		-0.158949	0.141505	-0.200958	0.321723
876	0.124986	0.236591	0.0543702	0.158031		-0.160053	0.141952	-0.200741	0.321646
877	0.125721	0.23689	0.0546771	0.158712		-0.161183	0.142411	-0.200544	0.321572
878	0.126438	0.237184	0.0549701	0.159397		-0.162339	0.142882	-0.200368	0.3215
879	0.127137	0.237472	0.0552492	0.160084		-0.16352	0.143366	-0.200211	0.32143
880	0.127816	0.237755	0.0555145	0.160773		-0.164724	0.143862	-0.200073	0.321362
881	0.128475	0.238031	0.0557663	0.161464		-0.16595	0.14437	-0.199953	0.321297
882	0.129114	0.238299	0.0560046	0.162156		-0.167196	0.144889	-0.199851	0.321235
883	0.129733	0.23856	0.0562299	0.162848		-0.168463	0.145419	-0.199765	0.321176
884	0.13033	0.238813	0.0564423	0.163541		-0.169747	0.14596	-0.199694	0.32112
885	0.130905	0.239056	0.0566423	0.164232		-0.171048	0.146512	-0.199639	0.321068
886	0.131458	0.23929	0.0568302	0.164923		-0.172365	0.147073	-0.199598	0.321019
887	0.131988	0.239513	0.0570065	0.165612		-0.173697	0.147645	-0.199569	0.320974
888	0.132493	0.239725	0.0571715	0.166299		-0.175042	0.148225	-0.199553	0.320933
889	0.132975	0.239925	0.0573257	0.166983		-0.176399	0.148815	-0.199548	0.320896
890	0.133431	0.240112	0.0574698	0.167664		-0.177766	0.149413	-0.199553	0.320863
891	0.133861	0.240287	0.0576043	0.168341		-0.179144	0.150019	-0.199568	0.320836
892	0.134265	0.240447	0.0577298	0.169015		-0.180529	0.150633	-0.199591	0.320813
893	0.134641	0.240594	0.057847	0.169684		-0.181922	0.151254	-0.199622	0.320795
894	0.13499	0.240725	0.0579567	0.170348		-0.183321	0.151882	-0.199659	0.320782
895	0.135309	0.24084	0.0580594	0.171007		-0.184725	0.152516	-0.199702	0.320776
896	0.1356	0.240939	0.058156	0.17166		-0.186132	0.153156	-0.19975	0.320775
897	0.13586	0.241022	0.0582473	0.172307		-0.187542	0.153802	-0.199802	0.32078
898	0.136089	0.241086	0.0583341	0.172948		-0.188953	0.154454	-0.199858	0.320792
899	0.136286	0.241133	0.0584172	0.173583		-0.190364	0.15511	-0.199915	0.320811
900	0.136451	0.241162	0.0584975	0.17421		-0.191774	0.15577	-0.199973	0.320837
901	0.136583	0.241172	0.0585758	0.174831		-0.193181	0.156435	-0.200032	0.32087
902	0.136681	0.241162	0.0586531	0.175445		-0.194585	0.157104	-0.20009	0.320912
903	0.136744	0.241132	0.0587303	0.176052		-0.195985	0.157776	-0.200147	0.320961
904	0.136772	0.241082	0.0588082	0.176651		-0.197378	0.158452	-0.200201	0.321018
905	0.136764	0.241012	0.0588877	0.177242		-0.198764	0.15913	-0.200252	0.321084
906	0.136719	0.240921	0.0589698	0.177826		-0.200142	0.159811	-0.200299	0.321159
907	0.136638	0.240808	0.0590552	0.178403		-0.20151	0.160494	-0.20034	0.321243
908	0.136518	0.240674	0.0591448	0.178971		-0.202868	0.16118	-0.200376	0.321336
909	0.136361	0.240518	0.0592393	0.179532		-0.204214	0.161867	-0.200404	0.321438
910	0.136164	0.24034	0.0593397	0.180085		-0.205547	0.162556	-0.200424	0.321551
911	0.135929	0.24014	0.0594466	0.18063		-0.206866	0.163246	-0.200434	0.321673
912	0.135654	0.239918	0.0595607	0.181168		-0.20817	0.163937	-0.200435	0.321806
913	0.135338	0.239674	0.0596829	0.181698		-0.209458	0.164629	-0.200425	0.321949
914	0.134983	0.239408	0.0598136	0.18222		-0.210729	0.165321	-0.200403	0.322103
915	0.134586	0.239119	0.0599536	0.182735		-0.211981	0.166015	-0.200367	0.322267
916	0.134148	0.238808	0.0601035	0.183242		-0.213215	0.166708	-0.200318	0.322443
917	0.133668	0.238474	0.0602638	0.183743		-0.214428	0.167402	-0.200254	0.32263
918	0.133146	0.238119	0.0604351	0.184236		-0.215621	0.168096	-0.200173	0.322828
919	0.132582	0.237741	0.0606178	0.184722		-0.216793	0.168789	-0.200077	0.323037
920	0.131975	0.237342	0.0608125	0.185202		-0.217942	0.169483	-0.199962	0.323259
921	0.131326	0.236921	0.0610194	0.185675		-0.219068	0.170176	-0.199829	0.323492
922	0.130633	0.236478	0.061239	0.186143		-0.220172	0.170869	-0.199676	0.323737
923	0.129898	0.236014	0.0614717	0.186604		-0.221251	0.171562	-0.199503	0.323994
924	0.129119	0.23553	0.0617176	0.187059		-0.222306	0.172253	-0.199309	0.324263
925	0.128296	0.235024	0.0619771	0.187508		-0.223336	0.172945	-0.199094	0.324544
926	0.127431	0.234499	0.0622503	0.187952		-0.224341	0.173635	-0.198856	0.324838
927	0.126522	0.233953	0.0625375	0.18839		-0.22532	0.174325	-0.198595	0.325144
928	0.12557	0.233387	0.0628387	0.188823		-0.226273	0.175014	-0.198311	0.325462
929	0.124575	0.232803	0.0631541	0.189251		-0.2272	0.175702	-0.198003	0.325793
930	0.123538	0.232199	0.0634837	0.189674		-0.2281	0.17639	-0.197669	0.326137
931	0.122457	0.231577	0.0638274	0.190092		-0.228974	0.177076	-0.197311	0.326493
932	0.121334	0.230937	0.0641854	0.190505		-0.22982	0.177762	-0.196927	0.326862
933	0.12017	0.230279	0.0645573	0.190913		-0.230639	0.178447	-0.196518	0.327243
934	0.118963	0.229605	0.0649432	0.191316		-0.23143	0.179131	-0.196082	0.327636
935	0.117714	0.228913	0.0653427	0.191714		-0.232193	0.179815	-0.19562	0.328042
936	0.116425	0.228206	0.0657556	0.192108		-0.232929	0.180498	-0.195132	0.32846
937	0.115094	0.227483	0.0661815	0.192497		-0.233637	0.18118	-0.194617	0.32889
938	0.113723	0.226745	0.0666202	0.192881		-0.234316	0.181861	-0.194076	0.329332
939	0.112312	0.225993	0.067071	0.193259		-0.234967	0.182542	-0.193508	0.329785
940	0.110861	0.225226	0.0675336	0.193633		-0.23559	0.183222	-0.192914	0.330251
941	0.109371	0.224446	0.0680073	0.194002		-0.236185	0.183901	-0.192293	0.330728
942	0.107842	0.223653	0.0684917	0.194365		-0.236752	0.18458	-0.191647	0.331216
943	0.106274	0.222848	0.0689861	0.194723		-0.23729	0.185258	-0.190974	0.331715
944	0.104669	0.222031	0.0694898	0.195075		-0.2378	0.185935	-0.190277	0.332225
945	0.103027	0.221202	0.0700023	0.195422		-0.238282	0.186612	-0.189554	0.332745
946	0.101348	0.220363	0.0705228	0.195762		-0.238736	0.187288	-0.188806	0.333276
947	0.0996334	0.219514	0.0710507	0.196097		-0.239163	0.187963	-0.188034	0.333817
948	0.097883	0.218656	0.071585	0.196425		-0.239561	0.188638	-0.187237	0.334367
949	0.0960977	0.217789	0.0721253	0.196748		-0.239932	0.189311	-0.186418	0.334927
950	0.0942783	0.216913	0.0726705	0.197063		-0.240276	0.189984	-0.185575	0.335496
951	0.0924254	0.216031	0.0732201	0.197373		-0.240592	0.190656	-0.18471	0.336073
952	0.0905397	0.215141	0.0737732	0.197675		-0.240882	0.191326	-0.183823	0.336659
953	0.0886221	0.214244	0.0743291	0.197971		-0.241145	0.191996	-0.182915	0.337253
954	0.0866732	0.213343	0.0748869	0.19826		-0.241382	0.192664	-0.181987	0.337855
955	0.0846938	0.212436	0.075446	0.198542		-0.241593	0.193331	-0.181039	0.338463
956	0.0826849	0.211525	0.0760055	0.198817		-0.241778	0.193996	-0.180072	0.339079
957	0.0806472	0.21061	0.0765649	0.199086		-0.241938	0.194659	-0.179087	0.3397
958	0.0785816	0.209692	0.0771234	0.199347		-0.242073	0.19532	-0.178085	0.340328
959	0.0764889	0.208771	0.0776804	0.199601		-0.242184	0.195979	-0.177067	0.340961
960	0.07437	0.207849	0.0782351	0.199848		-0.24227	0.196636	-0.176034	0.341599
961	0.0722258	0.206925	0.0787869	0.200088		-0.242332	0.19729	-0.174986	0.342241
962	0.0700572	0.206	0.0793354	0.200321		-0.242371	0.19794	-0.173926	0.342887
963	0.0678651	0.205076	0.0798799	0.200546		-0.242387	0.198588	-0.172854	0.343537
964	0.0656503	0.204151	0.08042	0.200765		-0.242381	0.199232	-0.17177	0.34419
965	0.063414	0.203228	0.0809551	0.200976		-0.242352	0.199872	-0.170677	0.344844
966	0.0611568	0.202306	0.0814849	0.201181		-0.242301	0.200508	-0.169575	0.345501
967	0.0588798	0.201386	0.0820089	0.201378		-0.242228	0.201139	-0.168465	0.34616
968	0.0565839	0.200468	0.0825267	0.201568		-0.242134	0.201765	-0.16735	0.346819
969	0.0542701	0.199554	0.083038	0.201751		-0.242019	0.202387	-0.166229	0.347479
970	0.0519395	0.198642	0.0835426	0.201928		-0.241883	0.203003	-0.165104	0.348139
971	0.0495929	0.197735	0.0840401	0.202097		-0.241727	0.203613	-0.163977	0.348798
972	0.0472315	0.196831	0.0845303	0.20226		-0.241551	0.204216	-0.162849	0.349456
973	0.0448562	0.195932	0.0850131	0.202416		-0.241355	0.204814	-0.161721	0.350114
974	0.0424681	0.195038	0.0854884	0.202566		-0.241139	0.205404	-0.160594	0.350769
975	0.0400683	0.19415	0.0859561	0.202708		-0.240904	0.205987	-0.159469	0.351423
976	0.0376579	0.193267	0.0864161	0.202844		-0.240651	0.206562	-0.158349	0.352073
977	0.0352378	0.19239	0.0868684	0.202974		-0.240378	0.207129	-0.157233	0.352721
978	0.0328093	0.191521	0.087313	0.203097		-0.240087	0.207687	-0.156123	0.353366
979	0.0303735	0.190657	0.0877501	0.203214		-0.239779	0.208237	-0.155022	0.354006
980	0.0279314	0.189802	0.0881798	0.203324		-0.239452	0.208777	-0.153928	0.354643
981	0.0254842	0.188954	0.0886022	0.203429		-0.239108	0.209307	-0.152845	0.355275
982	0.0230331	0.188113	0.0890173	0.203527		-0.238747	0.209827	-0.151773	0.355902
983	0.0205792	0.187281	0.0894255	0.203619		-0.238369	0.210337	-0.150714	0.356524
984	0.0181236	0.186458	0.0898268	0.203705		-0.237974	0.210836	-0.149668	0.357141
985	0.0156676	0.185644	0.0902214	0.203786		-0.237564	0.211324	-0.148636	0.357752
986	0.0132124	0.184839	0.0906095	0.203861		-0.237138	0.211799	-0.147621	0.358357
987	0.010759	0.184044	0.0909912	0.20393		-0.236697	0.212263	-0.146622	0.358955
988	0.0083086	0.183258	0.0913667	0.203993		-0.236241	0.212714	-0.145642	0.359547
989	0.00586245	0.182483	0.0917362	0.204051		-0.23577	0.213151	-0.144681	0.360132
990	0.00342167	0.181718	0.0920996	0.204104		-0.235286	0.213576	-0.14374	0.360709
991	0.000987407	0.180965	0.0924573	0.204151		-0.234789	0.213986	-0.14282	0.36128
992	-0.00143922	0.180222	0.0928091	0.204194		-0.234279	0.214383	-0.141922	0.361843
993	-0.00385708	0.179491	0.0931552	0.204231		-0.233757	0.214764	-0.141048	0.362398
994	-0.00626507	0.178772	0.0934956	0.204264		-0.233223	0.21513	-0.140197	0.362946
995	-0.0086621	0.178065	0.0938302	0.204292		-0.232679	0.215481	-0.139372	0.363485
996	-0.0110471	0.177371	0.0941589	0.204315		-0.232124	0.215816	-0.138573	0.364017
997	-0.0134189	0.176689	0.0944816	0.204334		-0.231561	0.216134	-0.137801	0.364541
998	-0.0157765	0.17602	0.0947983	0.204349		-0.230988	0.216436	-0.137056	0.365057
999	-0.0181189	0.175364	0.0951088	0.20436		-0.230408	0.21672	-0.13634	0.365564
1000	-0.0204451	0.174721	0.0954128	0.204366		-0.229821	0.216986	-0.135653	0.366064
1001	-0.0227541	0.174093	0.0957101	0.204369		-0.229228	0.217233	-0.134997	0.366555
1002	-0.0250449	0.173478	0.0960005	0.204369		-0.22863	0.217462	-0.134371	0.367038
1003	-0.0273167	0.172877	0.0962838	0.204365		-0.228028	0.217672	-0.133776	0.367513
1004	-0.0295686	0.172291	0.0965595	0.204357		-0.227423	0.217862	-0.133214	0.36798
1005	-0.0317998	0.171719	0.0968274	0.204346		-0.226815	0.218032	-0.132684	0.368439
1006	-0.0340094	0.171162	0.0970873	0.204332		-0.226206	0.218181	-0.132186	0.368889
1007	-0.0361968	0.170619	0.0973386	0.204314		-0.225598	0.218309	-0.131722	0.369332
1008	-0.0383611	0.170092	0.0975811	0.204294		-0.22499	0.218416	-0.131292	0.369767
1009	-0.0405016	0.16958	0.0978144	0.20427		-0.224385	0.2185	-0.130895	0.370195
1010	-0.0426177	0.169083	0.098038	0.204243		-0.223783	0.218562	-0.130533	0.370614
1011	-0.0447088	0.168601	0.0982514	0.204213		-0.223186	0.218602	-0.130205	0.371026
1012	-0.0467742	0.168135	0.0984542	0.20418		-0.222595	0.218618	-0.129911	0.37143
1013	-0.0488134	0.167685	0.0986458	0.204144		-0.222011	0.218611	-0.129652	0.371827
1014	-0.0508259	0.167249	0.0988257	0.204104		-0.221434	0.218579	-0.129428	0.372216
1015	-0.0528111	0.16683	0.0989933	0.204061		-0.220868	0.218523	-0.129239	0.372598
1016	-0.0547687	0.166426	0.0991481	0.204015		-0.220311	0.218442	-0.129084	0.372973
1017	-0.0566983	0.166038	0.0992893	0.203965		-0.219767	0.218336	-0.128964	0.37334
1018	-0.0585992	0.165665	0.0994164	0.203911		-0.219235	0.218204	-0.128879	0.373701
1019	-0.0604713	0.165308	0.0995288	0.203853		-0.218717	0.218045	-0.128828	0.374054
1020	-0.0623142	0.164966	0.0996257	0.203791		-0.218214	0.21786	-0.128811	0.374401
1021	-0.0641275	0.16464	0.0997065	0.203724		-0.217726	0.217648	-0.128828	0.374741
1022	-0.0659109	0.16433	0.0997704	0.203652		-0.217255	0.217409	-0.128879	0.375074
1023	-0.0676643	0.164035	0.0998167	0.203575		-0.216802	0.217142	-0.128964	0.3754
1024	-0.0693873	0.163756	0.0998448	0.203492		-0.216367	0.216846	-0.129081	0.37572
1025	-0.0710797	0.163492	0.0998538	0.203404		-0.21595	0.216522	-0.129232	0.376034
1026	-0.0727415	0.163244	0.0998428	0.203309		-0.215554	0.216169	-0.129414	0.376342
1027	-0.0743725	0.163011	0.0998113	0.203208		-0.215178	0.215787	-0.129629	0.376643
1028	-0.0759725	0.162793	0.0997582	0.203099		-0.214823	0.215375	-0.129875	0.376938
1029	-0.0775415	0.16259	0.0996829	0.202983		-0.21449	0.214933	-0.130152	0.377228
1030	-0.0790794	0.162403	0.0995845	0.202859		-0.214178	0.214461	-0.13046	0.377511
1031	-0.0805862	0.162231	0.0994623	0.202726		-0.213888	0.213959	-0.130797	0.377789
1032	-0.0820619	0.162074	0.0993154	0.202585		-0.213621	0.213426	-0.131165	0.378061
1033	-0.0835065	0.161932	0.0991431	0.202433		-0.213377	0.212862	-0.131562	0.378327
1034	-0.0849201	0.161805	0.0989446	0.202272		-0.213156	0.212266	-0.131987	0.378588
1035	-0.0863026	0.161693	0.0987192	0.2021		-0.212958	0.21164	-0.132441	0.378844
1036	-0.0876543	0.161595	0.0984664	0.201917		-0.212783	0.210981	-0.132923	0.379094
1037	-0.0889752	0.161512	0.0981854	0.201723		-0.212631	0.210291	-0.133432	0.379339
1038	-0.0902654	0.161444	0.0978757	0.201516		-0.212502	0.209569	-0.133968	0.379579
1039	-0.0915251	0.16139	0.0975368	0.201297		-0.212396	0.208815	-0.134531	0.379813
1040	-0.0927543	0.161351	0.0971682	0.201065		-0.212313	0.208028	-0.13512	0.380043
1041	-0.0939534	0.161326	0.0967695	0.20082		-0.212252	0.20721	-0.135735	0.380267
1042	-0.0951223	0.161315	0.0963404	0.20056		-0.212213	0.206359	-0.136375	0.380487
1043	-0.0962612	0.161319	0.0958806	0.200286		-0.212196	0.205477	-0.13704	0.380701
1044	-0.0973703	0.161336	0.0953898	0.199997		-0.2122	0.204562	-0.13773	0.38091
1045	-0.0984496	0.161368	0.094868	0.199692		-0.212225	0.203616	-0.138444	0.381115
1046	-0.0994993	0.161413	0.094315	0.199372		-0.212272	0.202637	-0.139181	0.381314
1047	-0.10052	0.161472	0.0937309	0.199037		-0.212338	0.201628	-0.139942	0.381509
1048	-0.10151	0.161545	0.0931156	0.198685		-0.212424	0.200587	-0.140725	0.381699
1049	-0.102472	0.161632	0.0924694	0.198316		-0.21253	0.199514	-0.141531	0.381884
1050	-0.103404	0.161732	0.0917924	0.197931		-0.212654	0.198412	-0.142359	0.382063
1051	-0.104307	0.161845	0.0910848	0.197529		-0.212797	0.197278	-0.143209	0.382238
1052	-0.105181	0.161972	0.0903469	0.19711		-0.212957	0.196115	-0.144079	0.382408
1053	-0.106027	0.162111	0.0895791	0.196675		-0.213133	0.194922	-0.14497	0.382573
1054	-0.106843	0.162264	0.0887818	0.196222		-0.213327	0.193699	-0.145881	0.382732
1055	-0.107631	0.162429	0.0879554	0.195752		-0.213535	0.192448	-0.146811	0.382887
1056	-0.10839	0.162608	0.0871005	0.195265		-0.213759	0.191169	-0.14776	0.383036
1057	-0.109121	0.162798	0.0862176	0.194761		-0.213997	0.189862	-0.148727	0.383179
1058	-0.109823	0.163001	0.0853074	0.194241		-0.214249	0.188528	-0.149711	0.383317
1059	-0.110497	0.163216	0.0843707	0.193704		-0.214514	0.187167	-0.150713	0.38345
1060	-0.111142	0.163443	0.0834083	0.19315		-0.214791	0.18578	-0.151731	0.383577
1061	-0.111759	0.163681	0.082421	0.19258		-0.21508	0.184367	-0.152764	0.383698
1062	-0.112348	0.163931	0.0814098	0.191995		-0.21538	0.18293	-0.153813	0.383814
1063	-0.112909	0.164192	0.0803757	0.191394		-0.21569	0.181469	-0.154876	0.383923
1064	-0.113441	0.164465	0.0793197	0.190779		-0.21601	0.179984	-0.155952	0.384027
1065	-0.113944	0.164747	0.0782431	0.190149		-0.216338	0.178477	-0.157042	0.384124
1066	-0.11442	0.165041	0.0771468	0.189505		-0.216675	0.176947	-0.158144	0.384215
1067	-0.114866	0.165345	0.0760322	0.188847		-0.21702	0.175396	-0.159257	0.384299
1068	-0.115284	0.165659	0.0749005	0.188177		-0.21737	0.173825	-0.160382	0.384377
1069	-0.115673	0.165982	0.073753	0.187495		-0.217727	0.172234	-0.161516	0.384448
1070	-0.116033	0.166316	0.072591	0.186801		-0.218089	0.170624	-0.16266	0.384512
1071	-0.116364	0.166659	0.0714158	0.186096		-0.218455	0.168995	-0.163813	0.384568
1072	-0.116666	0.167011	0.0702288	0.185382		-0.218825	0.167349	-0.164974	0.384617
1073	-0.116938	0.167373	0.0690315	0.184658		-0.219198	0.165686	-0.166142	0.384658
1074	-0.117182	0.167743	0.0678252	0.183926		-0.219574	0.164008	-0.167317	0.384692
1075	-0.117395	0.168123	0.0666114	0.183186		-0.21995	0.162314	-0.168497	0.384717
1076	-0.117579	0.168511	0.0653916	0.182439		-0.220327	0.160606	-0.169682	0.384734
1077	-0.117733	0.168907	0.0641673	0.181687		-0.220705	0.158884	-0.170871	0.384742
1078	-0.117858	0.169313	0.0629398	0.180929		-0.221081	0.15715	-0.172064	0.384741
1079	-0.117953	0.169726	0.0617108	0.180166		-0.221457	0.155404	-0.173259	0.384731
1080	-0.118017	0.170148	0.0604818	0.179401		-0.22183	0.153647	-0.174457	0.384712
1081	-0.118052	0.170579	0.0592542	0.178632		-0.2222	0.15188	-0.175656	0.384683
1082	-0.118057	0.171018	0.0580296	0.177862		-0.222567	0.150103	-0.176856	0.384645
1083	-0.118032	0.171465	0.0568094	0.177091		-0.222929	0.148318	-0.178055	0.384596
1084	-0.117976	0.17192	0.0555952	0.17632		-0.223287	0.146526	-0.179255	0.384537
1085	-0.117891	0.172384	0.0543886	0.17555		-0.22364	0.144727	-0.180453	0.384467
1086	-0.117775	0.172857	0.053191	0.174781		-0.223986	0.142922	-0.18165	0.384386
1087	-0.117628	0.173338	0.0520038	0.174016		-0.224327	0.141112	-0.182844	0.384293
1088	-0.117452	0.173827	0.0508287	0.173253		-0.22466	0.139299	-0.184035	0.384189
1089	-0.117245	0.174326	0.0496672	0.172495		-0.224987	0.137482	-0.185223	0.384074
1090	-0.117008	0.174833	0.0485206	0.171742		-0.225306	0.135662	-0.186406	0.383946
1091	-0.116741	0.175349	0.0473904	0.170994		-0.225617	0.133841	-0.187585	0.383806
1092	-0.116444	0.175875	0.0462782	0.170253		-0.22592	0.13202	-0.188758	0.383654
1093	-0.116117	0.176409	0.0451853	0.16952		-0.226215	0.130198	-0.189926	0.383489
1094	-0.11576	0.176953	0.0441132	0.168794		-0.226501	0.128378	-0.191086	0.383311
1095	-0.115374	0.177507	0.0430632	0.168077		-0.226779	0.126559	-0.19224	0.38312
1096	-0.114958	0.17807	0.0420366	0.167369		-0.227049	0.124744	-0.193385	0.382916
1097	-0.114512	0.178643	0.0410348	0.166671		-0.22731	0.122931	-0.194523	0.382698
1098	-0.114038	0.179226	0.040059	0.165983		-0.227563	0.121123	-0.195651	0.382467
1099	-0.113535	0.179819	0.0391104	0.165305		-0.227807	0.11932	-0.19677	0.382223
1100	-0.113003	0.180422	0.0381902	0.16464		-0.228043	0.117523	-0.19788	0.381964
1101	-0.112444	0.181035	0.0372995	0.163985		-0.228271	0.115732	-0.198979	0.381692
1102	-0.111857	0.181658	0.0364393	0.163343		-0.228491	0.113949	-0.200068	0.381406
1103	-0.111244	0.182291	0.0356106	0.162714		-0.228704	0.112174	-0.201146	0.381107
1104	-0.110604	0.182935	0.0348144	0.162098		-0.228908	0.110408	-0.202212	0.380793
1105	-0.109938	0.183589	0.0340517	0.161494		-0.229105	0.108651	-0.203267	0.380466
1106	-0.109247	0.184254	0.0333233	0.160905		-0.229295	0.106906	-0.20431	0.380125
1107	-0.108531	0.184929	0.03263	0.160329		-0.229478	0.105171	-0.205341	0.379771
1108	-0.107791	0.185614	0.0319727	0.159768		-0.229655	0.103449	-0.20636	0.379403
1109	-0.107028	0.18631	0.0313521	0.159221		-0.229825	0.101739	-0.207367	0.379021
1110	-0.106243	0.187015	0.0307689	0.158689		-0.229989	0.100044	-0.208361	0.378626
1111	-0.105435	0.187732	0.0302237	0.158171		-0.230147	0.0983624	-0.209343	0.378218
1112	-0.104606	0.188458	0.0297171	0.157669		-0.230301	0.0966965	-0.210312	0.377797
1113	-0.103757	0.189194	0.0292496	0.157181		-0.230449	0.0950468	-0.211268	0.377363
1114	-0.102888	0.189941	0.0288217	0.156709		-0.230593	0.0934141	-0.212212	0.376916
1115	-0.102	0.190698	0.0284339	0.156252		-0.230732	0.0917994	-0.213144	0.376457
1116	-0.101094	0.191465	0.0280866	0.155811		-0.230868	0.0902035	-0.214063	0.375985
1117	-0.10017	0.192241	0.0277802	0.155385		-0.231001	0.0886273	-0.214969	0.375501
1118	-0.0992286	0.193028	0.0275148	0.154974		-0.231131	0.0870717	-0.215863	0.375004
1119	-0.0982713	0.193824	0.0272907	0.154578		-0.231258	0.0855377	-0.216745	0.374496
1120	-0.0972984	0.19463	0.0271082	0.154198		-0.231384	0.0840262	-0.217614	0.373976
1121	-0.0963105	0.195446	0.0269673	0.153833		-0.231508	0.0825382	-0.218471	0.373444
1122	-0.0953084	0.196271	0.0268682	0.153483		-0.231631	0.0810747	-0.219317	0.372901
1123	-0.0942926	0.197106	0.0268108	0.153148		-0.231754	0.0796367	-0.22015	0.372347
1124	-0.0932639	0.197949	0.0267951	0.152828		-0.231877	0.0782254	-0.220972	0.371781
1125	-0.0922228	0.198801	0.026821	0.152523		-0.232001	0.0768417	-0.221783	0.371204
1126	-0.0911699	0.199663	0.0268884	0.152233		-0.232126	0.0754867	-0.222583	0.370616
1127	-0.0901058	0.200532	0.0269971	0.151957		-0.232252	0.0741617	-0.223372	0.370018
1128	-0.089031	0.20141	0.0271468	0.151696		-0.23238	0.0728678	-0.22415	0.369409
1129	-0.0879461	0.202295	0.0273373	0.151449		-0.232512	0.0716062	-0.224918	0.368789
1130	-0.0868516	0.203188	0.0275682	0.151215		-0.232646	0.0703781	-0.225677	0.368159
1131	-0.0857478	0.204089	0.027839	0.150996		-0.232784	0.0691849	-0.226425	0.367518
1132	-0.0846353	0.204996	0.0281493	0.15079		-0.232926	0.0680277	-0.227164	0.366867
1133	-0.0835146	0.20591	0.0284986	0.150598		-0.233073	0.0669081	-0.227894	0.366206
1134	-0.0823859	0.20683	0.0288862	0.150419		-0.233226	0.0658272	-0.228615	0.365534
1135	-0.0812498	0.207756	0.0293116	0.150252		-0.233384	0.0647866	-0.229327	0.364853
1136	-0.0801067	0.208687	0.029774	0.150099		-0.233548	0.0637875	-0.230032	0.364162
1137	-0.0789568	0.209624	0.0302728	0.149957		-0.233719	0.0628315	-0.230729	0.363461
1138	-0.0778008	0.210565	0.0308073	0.149827		-0.233898	0.0619199	-0.231418	0.36275
1139	-0.0766388	0.211511	0.0313767	0.14971		-0.234085	0.0610543	-0.232101	0.362029
1140	-0.0754714	0.212461	0.0319803	0.149603		-0.23428	0.0602359	-0.232776	0.361299
1141	-0.0742987	0.213414	0.0326173	0.149508		-0.234484	0.0594661	-0.233446	0.360559
1142	-0.0731213	0.214371	0.033287	0.149424		-0.234698	0.0587464	-0.23411	0.35981
1143	-0.0719393	0.215331	0.0339884	0.149351		-0.234922	0.058078	-0.234768	0.359051
1144	-0.0707532	0.216294	0.0347208	0.149288		-0.235156	0.0574621	-0.235421	0.358283
1145	-0.069563	0.217258	0.0354834	0.149235		-0.235401	0.0568998	-0.236069	0.357507
1146	-0.0683691	0.218225	0.0362753	0.149192		-0.235657	0.0563921	-0.236714	0.356721
1147	-0.0671717	0.219194	0.0370956	0.149158		-0.235926	0.0559399	-0.237354	0.355927
1148	-0.065971	0.220164	0.0379435	0.149134		-0.236206	0.055544	-0.237992	0.355125
1149	-0.0647672	0.221136	0.038818	0.14912		-0.236499	0.0552049	-0.238627	0.354314
1150	-0.0635606	0.222108	0.0397181	0.149114		-0.236804	0.0549231	-0.23926	0.353495
1151	-0.0623513	0.223081	0.040643	0.149117		-0.237122	0.0546988	-0.239891	0.352669
1152	-0.0611396	0.224055	0.0415917	0.149128		-0.237454	0.0545321	-0.240521	0.351835
1153	-0.0599257	0.225028	0.0425631	0.149148		-0.237799	0.0544227	-0.241151	0.350994
1154	-0.0587098	0.226002	0.0435563	0.149177		-0.238158	0.0543703	-0.241782	0.350147
1155	-0.057492	0.226975	0.0445703	0.149213		-0.238531	0.0543744	-0.242413	0.349292
1156	-0.0562725	0.227947	0.0456041	0.149257		-0.238918	0.0544342	-0.243046	0.348432
1157	-0.0550515	0.228919	0.0466566	0.149309		-0.23932	0.0545487	-0.243681	0.347566
1158	-0.0538291	0.229889	0.0477269	0.149369		-0.239735	0.0547169	-0.24432	0.346695
1159	-0.0526055	0.230858	0.048814	0.149436		-0.240166	0.0549373	-0.244962	0.345819
1160	-0.0513806	0.231825	0.0499168	0.149511		-0.24061	0.0552086	-0.245609	0.344938
1161	-0.0501546	0.232791	0.0510343	0.149592		-0.24107	0.0555292	-0.246261	0.344053
1162	-0.0489276	0.233754	0.0521655	0.149682		-0.241544	0.0558973	-0.246919	0.343165
1163	-0.0476995	0.234715	0.0533093	0.149778		-0.242032	0.0563112	-0.247584	0.342274
1164	-0.0464705	0.235672	0.0544647	0.149881		-0.242535	0.056769	-0.248256	0.341381
1165	-0.0452406	0.236627	0.0556307	0.14999		-0.243053	0.0572686	-0.248937	0.340485
1166	-0.0440098	0.237578	0.0568061	0.150106		-0.243585	0.0578081	-0.249627	0.339588
1167	-0.042778	0.238526	0.05799	0.150229		-0.244131	0.0583854	-0.250326	0.33869
1168	-0.0415453	0.239469	0.0591813	0.150358		-0.24469	0.0589985	-0.251036	0.337792
1169	-0.0403117	0.240408	0.0603789	0.150494		-0.245264	0.0596454	-0.251757	0.336894
1170	-0.0390771	0.241341	0.0615817	0.150635		-0.245851	0.0603238	-0.25249	0.335997
1171	-0.0378416	0.242269	0.0627887	0.150782		-0.24645	0.061032	-0.253235	0.335101
1172	-0.0366051	0.243191	0.0639986	0.150935		-0.247063	0.0617678	-0.253993	0.334207
1173	-0.0353678	0.244107	0.0652106	0.151094		-0.247688	0.0625293	-0.254765	0.333316
1174	-0.0341295	0.245016	0.0664232	0.151258		-0.248324	0.0633147	-0.25555	0.332428
1175	-0.0328903	0.245917	0.0676356	0.151427		-0.248972	0.0641222	-0.25635	0.331543
1176	-0.0316503	0.24681	0.0688465	0.151602		-0.249631	0.0649499	-0.257165	0.330663
1177	-0.0304096	0.247694	0.0700548	0.151782		-0.2503	0.0657962	-0.257995	0.329787
1178	-0.0291681	0.248569	0.0712594	0.151966		-0.250979	0.0666595	-0.25884	0.328917
1179	-0.0279261	0.249434	0.0724594	0.152156		-0.251667	0.0675383	-0.259701	0.328052
1180	-0.0266836	0.250288	0.0736535	0.15235		-0.252364	0.068431	-0.260579	0.327194
1181	-0.0254406	0.251131	0.0748408	0.152549		-0.253069	0.0693363	-0.261472	0.326343
1182	-0.0241974	0.251961	0.0760203	0.152753		-0.253781	0.0702528	-0.262383	0.325499
1183	-0.0229541	0.252778	0.0771911	0.152961		-0.2545	0.0711793	-0.26331	0.324663
1184	-0.0217107	0.25358	0.0783523	0.153174		-0.255226	0.0721145	-0.264254	0.323835
1185	-0.0204675	0.254368	0.0795029	0.153391		-0.255958	0.0730573	-0.265215	0.323015
1186	-0.0192246	0.25514	0.0806422	0.153612		-0.256695	0.0740065	-0.266193	0.322205
1187	-0.0179822	0.255895	0.0817693	0.153837		-0.257436	0.0749612	-0.267189	0.321404
1188	-0.0167405	0.256631	0.0828835	0.154066		-0.258182	0.0759204	-0.268202	0.320613
1189	-0.0154999	0.257349	0.083984	0.154299		-0.258932	0.076883	-0.269233	0.319831
1190	-0.0142605	0.258047	0.0850702	0.154536		-0.259685	0.0778483	-0.270281	0.31906
1191	-0.0130227	0.258724	0.0861414	0.154776		-0.26044	0.0788153	-0.271347	0.3183
1192	-0.0117869	0.259379	0.0871969	0.155021		-0.261198	0.0797833	-0.272431	0.317551
1193	-0.0105534	0.26001	0.0882361	0.155268		-0.261957	0.0807514	-0.273532	0.316812
1194	-0.00932264	0.260617	0.0892585	0.155519		-0.262717	0.0817189	-0.27465	0.316085
1195	-0.00809513	0.261198	0.0902634	0.155774		-0.263477	0.0826852	-0.275786	0.31537
1196	-0.00687133	0.261753	0.0912504	0.156032		-0.264238	0.0836495	-0.276939	0.314667
1197	-0.00565175	0.26228	0.0922189	0.156292		-0.264999	0.0846113	-0.27811	0.313975
1198	-0.00443691	0.262777	0.0931684	0.156556		-0.265759	0.0855699	-0.279297	0.313296
1199	-0.00322734	0.263245	0.0940985	0.156824		-0.266518	0.0865248	-0.2805	0.31263
1200	-0.0020236	0.263681	0.0950087	0.157093		-0.267275	0.0874754	-0.28172	0.311976
1201	-0.000826224	0.264084	0.0958988	0.157366		-0.268031	0.0884213	-0.282956	0.311335
1202	0.000364224	0.264454	0.0967682	0.157642		-0.268785	0.0893619	-0.284208	0.310707
1203	0.0015472	0.26479	0.0976167	0.15792		-0.269536	0.0902969	-0.285474	0.310092
1204	0.00272217	0.265089	0.098444	0.158202		-0.270285	0.0912257	-0.286755	0.30949
1205	0.00388862	0.265352	0.0992497	0.158485		-0.27103	0.0921479	-0.28805	0.308902
1206	0.00504604	0.265578	0.100034	0.158772		-0.271773	0.0930632	-0.289359	0.308327
1207	0.00619396	0.265765	0.100795	0.15906		-0.272512	0.0939711	-0.29068	0.307766
1208	0.00733194	0.265912	0.101535	0.159352		-0.273247	0.0948712	-0.292014	0.307218
1209	0.00845959	0.26602	0.102252	0.159645		-0.273979	0.0957631	-0.29336	0.306683
1210	0.0095765	0.266086	0.102946	0.159941		-0.274706	0.0966464	-0.294717	0.306162
1211	0.0106823	0.266111	0.103618	0.160239		-0.27543	0.0975208	-0.296084	0.305655
1212	0.0117768	0.266094	0.104267	0.160539		-0.276148	0.0983858	-0.297462	0.305161
1213	0.0128596	0.266034	0.104892	0.160841		-0.276863	0.0992412	-0.298848	0.304681
1214	0.0139304	0.265931	0.105495	0.161144		-0.277572	0.100087	-0.300243	0.304213
1215	0.014989	0.265784	0.106075	0.16145		-0.278277	0.100922	-0.301646	0.30376
1216	0.0160352	0.265594	0.106631	0.161756		-0.278976	0.101746	-0.303055	0.303319
1217	0.0170687	0.265359	0.107165	0.162064		-0.279671	0.102559	-0.304472	0.302892
1218	0.0180895	0.265079	0.107676	0.162374		-0.280361	0.103361	-0.305894	0.302478
1219	0.0190972	0.264754	0.108164	0.162684		-0.281045	0.104151	-0.30732	0.302077
1220	0.0200918	0.264384	0.10863	0.162995		-0.281724	0.104929	-0.308752	0.301689
1221	0.0210731	0.263969	0.109073	0.163306		-0.282399	0.105695	-0.310186	0.301314
1222	0.0220411	0.263509	0.109494	0.163618		-0.283068	0.106448	-0.311624	0.300952
1223	0.0229957	0.263003	0.109894	0.163929		-0.283732	0.107187	-0.313064	0.300602
1224	0.0239368	0.262452	0.110272	0.164241		-0.284391	0.107914	-0.314504	0.300265
1225	0.0248646	0.261856	0.110628	0.164552		-0.285045	0.108627	-0.315946	0.29994
1226	0.0257788	0.261214	0.110965	0.164862		-0.285694	0.109326	-0.317387	0.299628
1227	0.0266797	0.260527	0.111281	0.165171		-0.286339	0.110011	-0.318828	0.299328
1228	0.0275672	0.259796	0.111577	0.165479		-0.286979	0.110682	-0.320267	0.29904
1229	0.0284415	0.259019	0.111854	0.165786		-0.287614	0.111338	-0.321703	0.298764
1230	0.0293027	0.258199	0.112112	0.16609		-0.288245	0.111979	-0.323136	0.2985
1231	0.0301509	0.257334	0.112352	0.166391		-0.288871	0.112605	-0.324565	0.298247
1232	0.0309863	0.256426	0.112574	0.16669		-0.289494	0.113216	-0.325989	0.298005
1233	0.0318091	0.255475	0.112779	0.166986		-0.290112	0.113812	-0.327407	0.297775
1234	0.0326194	0.254482	0.112968	0.167278		-0.290727	0.114392	-0.328819	0.297555
1235	0.0334175	0.253447	0.11314	0.167566		-0.291338	0.114957	-0.330224	0.297346
1236	0.0342037	0.252371	0.113297	0.167849		-0.291946	0.115506	-0.331621	0.297148
1237	0.0349781	0.251254	0.113439	0.168128		-0.29255	0.116039	-0.33301	0.29696
1238	0.0357409	0.250098	0.113567	0.168402		-0.293151	0.116556	-0.334389	0.296783
1239	0.0364925	0.248902	0.113681	0.168669		-0.293749	0.117057	-0.335759	0.296615
1240	0.0372331	0.247669	0.113783	0.168931		-0.294344	0.117542	-0.337118	0.296457
1241	0.0379629	0.246399	0.113872	0.169185		-0.294936	0.118011	-0.338467	0.296309
1242	0.0386821	0.245093	0.113951	0.169433		-0.295525	0.118463	-0.339804	0.296171
1243	0.0393911	0.243751	0.114018	0.169673		-0.296112	0.118899	-0.341129	0.296042
1244	0.04009	0.242376	0.114075	0.169905		-0.296695	0.119318	-0.342441	0.295922
1245	0.040779	0.240967	0.114123	0.170128		-0.297276	0.119721	-0.343741	0.295811
1246	0.0414585	0.239527	0.114162	0.170342		-0.297854	0.120108	-0.345027	0.295709
1247	0.0421286	0.238056	0.114194	0.170546		-0.29843	0.120479	-0.346299	0.295616
1248	0.0427895	0.236554	0.114218	0.17074		-0.299003	0.120832	-0.347557	0.295532
1249	0.0434416	0.235025	0.114235	0.170924		-0.299574	0.12117	-0.348801	0.295457
1250	0.0440849	0.233468	0.114247	0.171096		-0.300143	0.121491	-0.350029	0.295391
1251	0.0447197	0.231885	0.114253	0.171257		-0.30071	0.121796	-0.351242	0.295333
1252	0.0453462	0.230276	0.114255	0.171405		-0.301275	0.122085	-0.352439	0.295284
1253	0.0459646	0.228644	0.114252	0.17154		-0.301839	0.122358	-0.35362	0.295243
1254	0.0465749	0.226989	0.114245	0.171663		-0.3024	0.122615	-0.354785	0.295211
1255	0.0471774	0.225313	0.114235	0.171771		-0.30296	0.122856	-0.355933	0.295187
1256	0.0477721	0.223616	0.114223	0.171866		-0.303518	0.123081	-0.357064	0.295171
1257	0.0483592	0.2219	0.114207	0.171946		-0.304075	0.12329	-0.358178	0.295164
1258	0.0489387	0.220166	0.11419	0.172011		-0.304631	0.123484	-0.359275	0.295165
1259	0.0495107	0.218416	0.114171	0.17206		-0.305184	0.123662	-0.360355	0.295174
1260	0.0500753	0.21665	0.114151	0.172094		-0.305736	0.123825	-0.361417	0.295192
1261	0.0506324	0.214871	0.11413	0.172112		-0.306287	0.123973	-0.362461	0.295218
1262	0.0511821	0.213078	0.114109	0.172114		-0.306836	0.124106	-0.363487	0.295252
1263	0.0517244	0.211274	0.114086	0.172098		-0.307383	0.124225	-0.364495	0.295294
1264	0.0522592	0.20946	0.114064	0.172066		-0.307928	0.124329	-0.365485	0.295345
1265	0.0527867	0.207638	0.114041	0.172015		-0.308472	0.124419	-0.366458	0.295404
1266	0.0533067	0.205807	0.114018	0.171948		-0.309014	0.124495	-0.367412	0.295471
1267	0.0538192	0.20397	0.113994	0.171862		-0.309553	0.124557	-0.368349	0.295547
1268	0.0543242	0.202128	0.113971	0.171758		-0.310091	0.124607	-0.369269	0.29563
1269	0.0548218	0.200283	0.113947	0.171635		-0.310626	0.124643	-0.370171	0.295722
1270	0.0553118	0.198435	0.113923	0.171493		-0.311159	0.124667	-0.371055	0.295822
1271	0.0557944	0.196586	0.113898	0.171332		-0.311689	0.124678	-0.371923	0.295931
1272	0.0562694	0.194737	0.113873	0.171152		-0.312217	0.124678	-0.372774	0.296048
1273	0.056737	0.19289	0.113846	0.170952		-0.312742	0.124667	-0.373609	0.296173
1274	0.0571971	0.191046	0.113819	0.170732		-0.313264	0.124644	-0.374428	0.296306
1275	0.0576496	0.189206	0.113789	0.170493		-0.313783	0.124611	-0.37523	0.296447
1276	0.0580946	0.187371	0.113758	0.170233		-0.314299	0.124567	-0.376018	0.296597
1277	0.058532	0.185543	0.113725	0.169953		-0.314811	0.124514	-0.376791	0.296755
1278	0.0589616	0.183723	0.113688	0.169653		-0.31532	0.124452	-0.377548	0.296921
1279	0.0593835	0.181912	0.113648	0.169333		-0.315825	0.124381	-0.378292	0.297095
1280	0.0597975	0.180111	0.113604	0.168992		-0.316326	0.124302	-0.379022	0.297276
1281	0.0602035	0.178322	0.113555	0.168632		-0.316822	0.124215	-0.379739	0.297466
1282	0.0606013	0.176546	0.113501	0.16825		-0.317315	0.124121	-0.380442	0.297663
1283	0.060991	0.174783	0.113442	0.167848		-0.317802	0.124021	-0.381133	0.297868
1284	0.0613722	0.173036	0.113375	0.167426		-0.318285	0.123915	-0.381812	0.29808
1285	0.0617449	0.171305	0.113302	0.166983		-0.318762	0.123803	-0.38248	0.298298
1286	0.0621089	0.169591	0.113221	0.16652		-0.319234	0.123687	-0.383137	0.298524
1287	0.062464	0.167896	0.113132	0.166037		-0.3197	0.123567	-0.383783	0.298757
1288	0.06281	0.166219	0.113033	0.165534		-0.320161	0.123444	-0.384419	0.298995
1289	0.0631468	0.164564	0.112925	0.16501		-0.320615	0.123318	-0.385046	0.29924
1290	0.0634742	0.162929	0.112807	0.164466		-0.321063	0.12319	-0.385665	0.299491
1291	0.0637918	0.161317	0.112677	0.163902		-0.321504	0.12306	-0.386275	0.299747
1292	0.0640996	0.159728	0.112536	0.163318		-0.321938	0.12293	-0.386878	0.300009
1293	0.0643972	0.158163	0.112382	0.162714		-0.322366	0.1228	-0.387475	0.300276
1294	0.0646844	0.156623	0.112215	0.162091		-0.322786	0.12267	-0.388066	0.300548
1295	0.0649609	0.155109	0.112035	0.161449		-0.323198	0.122542	-0.388652	0.300824
1296	0.0652266	0.153621	0.11184	0.160787		-0.323602	0.122416	-0.389234	0.301105
1297	0.0654812	0.15216	0.111629	0.160106		-0.323999	0.122293	-0.389812	0.30139
1298	0.0657245	0.150727	0.111403	0.159406		-0.324387	0.122173	-0.390388	0.301678
1299	0.0659561	0.149322	0.111161	0.158688		-0.324767	0.122057	-0.390962	0.301971
1300	0.066176	0.147946	0.110902	0.157951		-0.325139	0.121947	-0.391535	0.302266
1301	0.0663839	0.1466	0.110625	0.157196		-0.325502	0.121842	-0.392107	0.302565
1302	0.0665796	0.145283	0.110329	0.156423		-0.325856	0.121743	-0.392681	0.302867
1303	0.0667629	0.143997	0.110015	0.155632		-0.326201	0.121652	-0.393256	0.303172
1304	0.0669335	0.142741	0.109682	0.154824		-0.326537	0.121568	-0.393833	0.303479
1305	0.0670914	0.141516	0.109329	0.153999		-0.326864	0.121493	-0.394414	0.303789
1306	0.0672362	0.140323	0.108956	0.153158		-0.327181	0.121428	-0.394999	0.3041
1307	0.0673677	0.139161	0.108562	0.152299		-0.32749	0.121373	-0.395588	0.304414
1308	0.0674858	0.13803	0.108146	0.151425		-0.327789	0.121329	-0.396183	0.30473
1309	0.0675902	0.136932	0.107709	0.150535		-0.328078	0.121296	-0.396785	0.305048
1310	0.0676807	0.135865	0.10725	0.14963		-0.328359	0.121277	-0.397394	0.305368
1311	0.0677571	0.134831	0.106768	0.14871		-0.328629	0.12127	-0.398012	0.30569
1312	0.0678191	0.133828	0.106264	0.147775		-0.328891	0.121278	-0.398638	0.306013
1313	0.0678667	0.132857	0.105736	0.146826		-0.329144	0.121301	-0.399273	0.306338
1314	0.0678995	0.131918	0.105185	0.145863		-0.329387	0.121339	-0.399919	0.306665
1315	0.0679175	0.131011	0.104611	0.144887		-0.329622	0.121394	-0.400576	0.306993
1316	0.0679204	0.130135	0.104012	0.143899		-0.329848	0.121465	-0.401245	0.307323
1317	0.0679081	0.12929	0.103389	0.142898		-0.330065	0.121555	-0.401926	0.307655
1318	0.0678803	0.128476	0.102742	0.141885		-0.330273	0.121663	-0.402619	0.307988
1319	0.067837	0.127692	0.10207	0.140861		-0.330474	0.12179	-0.403326	0.308324
1320	0.0677778	0.126939	0.101374	0.139825		-0.330666	0.121938	-0.404046	0.308661
1321	0.0677028	0.126216	0.100653	0.13878		-0.33085	0.122105	-0.404781	0.309
1322	0.0676116	0.125522	0.0999077	0.137724		-0.331027	0.122294	-0.40553	0.309341
1323	0.0675042	0.124857	0.0991373	0.136659		-0.331196	0.122504	-0.406295	0.309685
1324	0.0673803	0.124221	0.0983421	0.135584		-0.331358	0.122736	-0.407075	0.31003
1325	0.0672398	0.123612	0.097522	0.134501		-0.331514	0.12299	-0.407872	0.310378
1326	0.0670825	0.123032	0.0966771	0.13341		-0.331664	0.123268	-0.408684	0.310728
1327	0.0669081	0.122478	0.0958073	0.132311		-0.331807	0.123568	-0.409514	0.311081
1328	0.0667164	0.121951	0.0949128	0.131204		-0.331946	0.123892	-0.41036	0.311437
1329	0.0665074	0.12145	0.0939935	0.130091		-0.332079	0.124239	-0.411224	0.311796
1330	0.0662806	0.120975	0.0930496	0.128972		-0.332209	0.124611	-0.412105	0.312157
1331	0.0660361	0.120525	0.0920812	0.127847		-0.332334	0.125006	-0.413004	0.312521
1332	0.0657735	0.120099	0.0910884	0.126716		-0.332456	0.125425	-0.413921	0.312889
1333	0.0654927	0.119697	0.0900713	0.12558		-0.332575	0.125868	-0.414856	0.31326
1334	0.0651934	0.119319	0.0890301	0.124441		-0.332692	0.126334	-0.41581	0.313634
1335	0.0648756	0.118963	0.0879651	0.123297		-0.332807	0.126824	-0.416781	0.314012
1336	0.0645389	0.11863	0.0868765	0.122149		-0.332921	0.127338	-0.41777	0.314394
1337	0.0641832	0.118318	0.0857647	0.120999		-0.333035	0.127875	-0.418778	0.314779
1338	0.0638083	0.118028	0.0846298	0.119847		-0.333148	0.128434	-0.419803	0.315167
1339	0.0634142	0.117758	0.0834724	0.118692		-0.333262	0.129016	-0.420846	0.31556
1340	0.0630005	0.117509	0.0822927	0.117536		-0.333378	0.12962	-0.421907	0.315956
1341	0.0625673	0.117279	0.0810912	0.116379		-0.333494	0.130245	-0.422985	0.316356
1342	0.0621144	0.117069	0.0798683	0.115222		-0.333613	0.130891	-0.424081	0.31676
1343	0.0616417	0.116878	0.0786245	0.114066		-0.333735	0.131557	-0.425193	0.317168
1344	0.061149	0.116706	0.0773603	0.11291		-0.33386	0.132243	-0.426322	0.317579
1345	0.0606364	0.116552	0.0760762	0.111755		-0.333988	0.132948	-0.427466	0.317995
1346	0.0601036	0.116415	0.0747728	0.110602		-0.334121	0.133671	-0.428627	0.318414
1347	0.0595507	0.116297	0.0734507	0.109452		-0.334258	0.134412	-0.429803	0.318838
1348	0.0589775	0.116195	0.0721105	0.108305		-0.334401	0.13517	-0.430993	0.319265
1349	0.058384	0.116111	0.0707529	0.107162		-0.334549	0.135943	-0.432198	0.319696
1350	0.05777	0.116044	0.0693786	0.106023		-0.334703	0.136732	-0.433416	0.320131
1351	0.0571356	0.115993	0.0679883	0.104889		-0.334864	0.137535	-0.434648	0.32057
1352	0.0564807	0.115959	0.0665828	0.10376		-0.335031	0.138352	-0.435891	0.321013
1353	0.0558054	0.115941	0.0651628	0.102637		-0.335206	0.139182	-0.437146	0.32146
1354	0.0551095	0.115939	0.0637291	0.10152		-0.335387	0.140023	-0.438412	0.32191
1355	0.0543931	0.115953	0.0622825	0.100411		-0.335576	0.140876	-0.439688	0.322365
1356	0.0536562	0.115983	0.0608239	0.0993097		-0.335773	0.141739	-0.440972	0.322823
1357	0.0528988	0.116029	0.0593541	0.0982164		-0.335978	0.142611	-0.442265	0.323285
1358	0.0521212	0.116091	0.057874	0.0971319		-0.33619	0.143491	-0.443565	0.32375
1359	0.0513233	0.116169	0.0563844	0.0960567		-0.336412	0.144379	-0.444872	0.32422
1360	0.0505052	0.116262	0.0548863	0.0949914		-0.336641	0.145274	-0.446184	0.324692
1361	0.0496672	0.11637	0.0533805	0.0939365		-0.336879	0.146174	-0.4475	0.325169
1362	0.0488093	0.116494	0.0518681	0.0928924		-0.337126	0.147079	-0.44882	0.325649
1363	0.0479318	0.116634	0.0503498	0.0918597		-0.337381	0.147988	-0.450143	0.326132
1364	0.0470349	0.116788	0.0488268	0.0908388		-0.337644	0.148901	-0.451467	0.326619
1365	0.0461187	0.116958	0.0472998	0.0898302		-0.337916	0.149815	-0.452792	0.327109
1366	0.0451835	0.117143	0.0457699	0.0888342		-0.338196	0.150731	-0.454116	0.327602
1367	0.0442297	0.117344	0.0442381	0.0878514		-0.338484	0.151648	-0.455438	0.328098
1368	0.0432574	0.117559	0.0427052	0.086882		-0.338781	0.152564	-0.456757	0.328597
1369	0.0422669	0.11779	0.0411722	0.0859265		-0.339085	0.153479	-0.458073	0.329099
1370	0.0412586	0.118036	0.0396402	0.0849852		-0.339398	0.154392	-0.459384	0.329604
1371	0.0402327	0.118296	0.0381102	0.0840583		-0.339718	0.155303	-0.460688	0.330111
1372	0.0391896	0.118572	0.0365831	0.0831463		-0.340047	0.15621	-0.461985	0.330621
1373	0.0381295	0.118862	0.03506	0.0822494		-0.340382	0.157112	-0.463274	0.331134
1374	0.037053	0.119167	0.033542	0.0813678		-0.340726	0.15801	-0.464552	0.331648
1375	0.0359603	0.119487	0.0320301	0.0805016		-0.341077	0.158902	-0.46582	0.332165
1376	0.0348519	0.119821	0.0305254	0.0796511		-0.341436	0.159787	-0.467075	0.332684
1377	0.0337283	0.12017	0.029029	0.0788163		-0.341802	0.160665	-0.468316	0.333206
1378	0.0325899	0.120533	0.0275421	0.0779975		-0.342175	0.161536	-0.469542	0.333729
1379	0.0314373	0.120911	0.0260658	0.0771947		-0.342556	0.162398	-0.470753	0.334254
1380	0.030271	0.121302	0.0246012	0.0764078		-0.342945	0.16325	-0.471945	0.334781
1381	0.0290916	0.121708	0.0231496	0.075637		-0.343341	0.164093	-0.473119	0.33531
1382	0.0278996	0.122127	0.0217121	0.0748822		-0.343744	0.164926	-0.474272	0.335841
1383	0.0266956	0.12256	0.0202899	0.0741433		-0.344155	0.165748	-0.475404	0.336373
1384	0.0254802	0.123007	0.0188843	0.0734203		-0.344573	0.166558	-0.476512	0.336906
1385	0.0242541	0.123466	0.0174965	0.072713		-0.344998	0.167357	-0.477596	0.337442
1386	0.0230179	0.123938	0.0161277	0.0720214		-0.345431	0.168143	-0.478654	0.337978
1387	0.0217721	0.124423	0.0147791	0.0713452		-0.34587	0.168916	-0.479685	0.338516
1388	0.0205176	0.124921	0.013452	0.0706843		-0.346317	0.169676	-0.480687	0.339055
1389	0.0192551	0.12543	0.0121475	0.0700385		-0.34677	0.170423	-0.481659	0.339595
1390	0.0179852	0.12595	0.0108669	0.0694075		-0.347231	0.171156	-0.482599	0.340135
1391	0.0167087	0.126482	0.00961144	0.068791		-0.347698	0.171874	-0.483507	0.340677
1392	0.0154263	0.127025	0.00838229	0.0681888		-0.348171	0.172578	-0.48438	0.34122
1393	0.0141389	0.127578	0.0071807	0.0676006		-0.348651	0.173267	-0.485218	0.341763
1394	0.0128472	0.128142	0.00600788	0.0670259		-0.349138	0.173941	-0.48602	0.342307
1395	0.0115521	0.128714	0.00486506	0.0664645		-0.349631	0.1746	-0.486784	0.342852
1396	0.0102543	0.129296	0.00375341	0.0659159		-0.350129	0.175243	-0.487508	0.343397
1397	0.00895456	0.129886	0.00267411	0.0653799		-0.350634	0.175871	-0.488193	0.343942
1398	0.00765375	0.130485	0.00162828	0.064856		-0.351144	0.176484	-0.488836	0.344488
1399	0.00635265	0.13109	0.00061705	0.0643438		-0.35166	0.177081	-0.489437	0.345034
1400	0.00505203	0.131703	-0.000358503	0.0638428		-0.35218	0.177662	-0.489994	0.34558
1401	0.00375263	0.132322	-0.00129731	0.0633528		-0.352706	0.178228	-0.490507	0.346126
1402	0.00245521	0.132947	-0.00219834	0.0628732		-0.353236	0.178778	-0.490974	0.346673
1403	0.00116047	0.133578	-0.00306058	0.0624036		-0.353771	0.179312	-0.491394	0.34722
1404	-0.000130887	0.134213	-0.00388308	0.0619435		-0.354309	0.179831	-0.491766	0.347766
1405	-0.0014182	0.134852	-0.00466492	0.0614926		-0.354852	0.180334	-0.49209	0.348313
1406	-0.00270085	0.135495	-0.00540522	0.0610504		-0.355398	0.180822	-0.492364	0.348859
1407	-0.00397822	0.136141	-0.00610312	0.0606164		-0.355947	0.181294	-0.492588	0.349405
1408	-0.00524976	0.136789	-0.0067578	0.0601904		-0.356499	0.181752	-0.49276	0.349952
1409	-0.00651493	0.137439	-0.00736849	0.0597719		-0.357054	0.182195	-0.49288	0.350497
1410	-0.00777324	0.13809	-0.00793441	0.0593605		-0.35761	0.182622	-0.492948	0.351042
1411	-0.00902423	0.138742	-0.00845485	0.0589558		-0.358169	0.183036	-0.492961	0.351587
1412	-0.0102675	0.139395	-0.00892915	0.0585576		-0.358729	0.183434	-0.492921	0.352131
1413	-0.0115026	0.140046	-0.0093567	0.0581655		-0.359291	0.183819	-0.492827	0.352674
1414	-0.0127292	0.140697	-0.00973693	0.0577792		-0.359853	0.18419	-0.492677	0.353216
1415	-0.013947	0.141347	-0.0100694	0.0573984		-0.360416	0.184546	-0.492471	0.353756
1416	-0.0151558	0.141995	-0.0103536	0.057023		-0.36098	0.18489	-0.49221	0.354296
1417	-0.0163552	0.14264	-0.0105892	0.0566527		-0.361544	0.18522	-0.491892	0.354834
1418	-0.0175452	0.143283	-0.010776	0.0562873		-0.362107	0.185537	-0.491517	0.35537
1419	-0.0187254	0.143923	-0.0109137	0.0559268		-0.362671	0.185841	-0.491086	0.355904
1420	-0.0198958	0.144559	-0.0110021	0.0555711		-0.363234	0.186132	-0.490597	0.356436
1421	-0.0210561	0.145192	-0.0110413	0.0552201		-0.363796	0.186411	-0.490051	0.356966
1422	-0.0222064	0.14582	-0.0110312	0.0548738		-0.364357	0.186678	-0.489447	0.357494
1423	-0.0233464	0.146444	-0.0109719	0.0545324		-0.364917	0.186933	-0.488786	0.358019
1424	-0.0244763	0.147063	-0.0108635	0.0541958		-0.365475	0.187176	-0.488067	0.358541
1425	-0.0255958	0.147677	-0.0107063	0.0538642		-0.366031	0.187407	-0.48729	0.35906
1426	-0.026705	0.148285	-0.0105005	0.0535378		-0.366585	0.187627	-0.486456	0.359575
1427	-0.027804	0.148889	-0.0102466	0.0532169		-0.367137	0.187835	-0.485563	0.360087
1428	-0.0288926	0.149486	-0.00994503	0.0529016		-0.367685	0.188033	-0.484614	0.360595
1429	-0.0299711	0.150078	-0.00959627	0.0525924		-0.368231	0.188219	-0.483607	0.361099
1430	-0.0310393	0.150663	-0.00920092	0.0522897		-0.368772	0.188396	-0.482543	0.361598
1431	-0.0320973	0.151243	-0.00875965	0.0519938		-0.36931	0.188561	-0.481422	0.362092
1432	-0.0331452	0.151816	-0.00827318	0.0517053		-0.369843	0.188717	-0.480245	0.362581
1433	-0.034183	0.152384	-0.0077423	0.0514248		-0.370372	0.188863	-0.479012	0.363064
1434	-0.0352108	0.152945	-0.00716785	0.0511528		-0.370895	0.188999	-0.477724	0.363541
1435	-0.0362286	0.1535	-0.00655076	0.05089		-0.371413	0.189126	-0.476381	0.364012
1436	-0.0372364	0.154048	-0.00589199	0.050637		-0.371925	0.189244	-0.474983	0.364477
1437	-0.0382344	0.154591	-0.00519257	0.0503947		-0.372431	0.189354	-0.473532	0.364935
1438	-0.0392225	0.155129	-0.00445358	0.0501638		-0.37293	0.189454	-0.472027	0.365385
1439	-0.0402008	0.15566	-0.00367613	0.0499451		-0.373422	0.189547	-0.47047	0.365828
1440	-0.0411692	0.156187	-0.00286138	0.0497395		-0.373906	0.189632	-0.468861	0.366263
1441	-0.0421277	0.156708	-0.00201051	0.0495477		-0.374383	0.189709	-0.467201	0.366689
1442	-0.0430763	0.157225	-0.00112472	0.0493708		-0.374852	0.189779	-0.46549	0.367107
1443	-0.0440149	0.157738	-0.00020525	0.0492096		-0.375312	0.189842	-0.463731	0.367516
1444	-0.0449435	0.158246	0.000746669	0.0490651		-0.375763	0.189898	-0.461923	0.367916
1445	-0.0458619	0.158751	0.00172978	0.0489381		-0.376205	0.189948	-0.460067	0.368306
1446	-0.04677	0.159253	0.00274281	0.0488296		-0.376638	0.189991	-0.458164	0.368686
1447	-0.0476677	0.159752	0.00378449	0.0487405		-0.377061	0.190029	-0.456217	0.369057
1448	-0.048555	0.16025	0.00485351	0.0486718		-0.377474	0.190061	-0.454224	0.369416
1449	-0.0494314	0.160745	0.00594855	0.0486242		-0.377877	0.190087	-0.452188	0.369765
1450	-0.0502969	0.16124	0.00706828	0.0485988		-0.37827	0.190109	-0.45011	0.370104
1451	-0.0511511	0.161734	0.00821132	0.0485962		-0.378652	0.190126	-0.447991	0.370431
1452	-0.0519937	0.162228	0.00937624	0.0486173		-0.379023	0.190138	-0.445831	0.370746
1453	-0.0528243	0.162723	0.0105616	0.0486628		-0.379383	0.190146	-0.443633	0.37105
1454	-0.0536425	0.16322	0.0117659	0.0487333		-0.379732	0.190151	-0.441397	0.371342
1455	-0.0544479	0.163719	0.0129877	0.0488293		-0.38007	0.190152	-0.439125	0.371621
1456	-0.0552399	0.164221	0.0142253	0.0489513		-0.380397	0.190149	-0.436817	0.371888
1457	-0.056018	0.164726	0.0154773	0.0490998		-0.380712	0.190144	-0.434476	0.372142
1458	-0.0567817	0.165235	0.016742	0.049275		-0.381016	0.190136	-0.432102	0.372383
1459	-0.0575302	0.16575	0.0180178	0.0494772		-0.381309	0.190125	-0.429696	0.372611
1460	-0.0582629	0.16627	0.0193031	0.0497065		-0.381591	0.190113	-0.427261	0.372825
1461	-0.0589792	0.166797	0.0205963	0.0499629		-0.381862	0.190098	-0.424797	0.373026
1462	-0.0596783	0.167331	0.0218956	0.0502465		-0.382121	0.190082	-0.422306	0.373213
1463	-0.0603596	0.167873	0.0231995	0.0505571		-0.38237	0.190065	-0.41979	0.373385
1464	-0.0610223	0.168423	0.0245064	0.0508945		-0.382607	0.190047	-0.417248	0.373543
1465	-0.0616656	0.168983	0.0258144	0.0512584		-0.382833	0.190029	-0.414684	0.373687
1466	-0.0622889	0.169554	0.0271221	0.0516484		-0.383049	0.19001	-0.412098	0.373816
1467	-0.0628912	0.170135	0.0284278	0.0520641		-0.383253	0.18999	-0.409491	0.373931
1468	-0.0634718	0.170728	0.0297298	0.0525048		-0.383447	0.189972	-0.406866	0.37403
1469	-0.0640299	0.171334	0.0310265	0.0529701		-0.38363	0.189953	-0.404222	0.374115
1470	-0.0645644	0.171953	0.0323163	0.0534591		-0.383803	0.189935	-0.401561	0.374184
1471	-0.0650747	0.172587	0.0335975	0.0539711		-0.383965	0.189919	-0.398886	0.374238
1472	-0.0655597	0.173235	0.0348687	0.0545054		-0.384116	0.189903	-0.396196	0.374277
1473	-0.0660184	0.173899	0.0361281	0.055061		-0.384257	0.189889	-0.393493	0.3743
1474	-0.0664501	0.17458	0.0373743	0.0556372		-0.384388	0.189877	-0.390779	0.374308
1475	-0.0668536	0.175278	0.0386057	0.056233		-0.384508	0.189867	-0.388054	0.374301
1476	-0.0672279	0.175995	0.0398208	0.0568475		-0.384617	0.189858	-0.38532	0.374278
1477	-0.0675722	0.17673	0.0410182	0.0574798		-0.384716	0.189852	-0.382578	0.37424
1478	-0.0678854	0.177485	0.0421966	0.0581289		-0.384805	0.189849	-0.379829	0.374187
1479	-0.0681663	0.178261	0.0433545	0.0587938		-0.384884	0.189848	-0.377075	0.374118
1480	-0.068414	0.179058	0.0444908	0.0594736		-0.384952	0.18985	-0.374316	0.374034
1481	-0.0686273	0.179878	0.0456042	0.0601674		-0.385011	0.189855	-0.371555	0.373935
1482	-0.0688051	0.180721	0.0466936	0.0608742		-0.385059	0.189863	-0.368791	0.373821
1483	-0.0689462	0.181587	0.0477579	0.0615929		-0.385098	0.189874	-0.366027	0.373691
1484	-0.0690496	0.182478	0.0487962	0.0623227		-0.385128	0.189889	-0.363264	0.373548
1485	-0.0691141	0.183394	0.0498075	0.0630627		-0.385148	0.189906	-0.360502	0.373389
1486	-0.0691385	0.184336	0.0507909	0.0638118		-0.385159	0.189927	-0.357744	0.373216
1487	-0.0691217	0.185304	0.0517457	0.0645693		-0.385161	0.189951	-0.354989	0.373028
1488	-0.0690627	0.186301	0.0526711	0.0653342		-0.385154	0.189978	-0.35224	0.372827
1489	-0.0689602	0.187325	0.0535664	0.0661056		-0.38514	0.190008	-0.349496	0.372612
1490	-0.0688132	0.188379	0.054431	0.0668829		-0.385117	0.190042	-0.346761	0.372382
1491	-0.0686208	0.189462	0.0552643	0.0676652		-0.385087	0.190079	-0.344033	0.37214
1492	-0.0683818	0.190575	0.056066	0.0684516		-0.385049	0.190119	-0.341315	0.371884
1493	-0.0680952	0.19172	0.0568355	0.0692415		-0.385005	0.190162	-0.338607	0.371615
1494	-0.0677601	0.192896	0.0575725	0.0700342		-0.384955	0.190208	-0.335911	0.371333
1495	-0.0673754	0.194104	0.0582767	0.070829		-0.384898	0.190256	-0.333226	0.371039
1496	-0.0669404	0.195344	0.0589479	0.0716252		-0.384836	0.190308	-0.330554	0.370732
1497	-0.0664541	0.196618	0.0595859	0.0724222		-0.384769	0.190362	-0.327896	0.370413
1498	-0.0659156	0.197925	0.0601905	0.0732194		-0.384697	0.190418	-0.325253	0.370082
1499	-0.0653243	0.199267	0.0607617	0.0740164		-0.384621	0.190476	-0.322624	0.369739
1500	-0.0646793	0.200642	0.0612994	0.0748124		-0.384542	0.190537	-0.320012	0.369385
1501	-0.06398	0.202053	0.0618036	0.0756072		-0.384459	0.190599	-0.317416	0.36902
1502	-0.0632259	0.203498	0.0622744	0.0764002		-0.384374	0.190662	-0.314837	0.368644
1503	-0.0624164	0.204979	0.0627117	0.0771909		-0.384286	0.190727	-0.312275	0.368258
1504	-0.0615512	0.206495	0.0631159	0.0779789		-0.384197	0.190793	-0.309732	0.367861
1505	-0.0606297	0.208046	0.063487	0.078764		-0.384105	0.190859	-0.307208	0.367454
1506	-0.0596517	0.209633	0.0638252	0.0795456		-0.384013	0.190926	-0.304703	0.367038
1507	-0.0586169	0.211255	0.0641308	0.0803234		-0.38392	0.190993	-0.302218	0.366613
1508	-0.0575253	0.212913	0.0644039	0.0810971		-0.383826	0.191059	-0.299753	0.366178
1509	-0.0563767	0.214607	0.064645	0.0818663		-0.383732	0.191125	-0.297308	0.365736
1510	-0.055171	0.216335	0.0648544	0.0826308		-0.383638	0.191189	-0.294885	0.365285
1511	-0.0539084	0.218099	0.0650324	0.0833903		-0.383544	0.191252	-0.292482	0.364827
1512	-0.0525891	0.219898	0.0651794	0.0841444		-0.38345	0.191313	-0.290102	0.364362
1513	-0.0512131	0.221731	0.0652959	0.0848929		-0.383357	0.191372	-0.287742	0.36389
1514	-0.0497809	0.223599	0.0653825	0.0856356		-0.383264	0.191428	-0.285405	0.363412
1515	-0.0482927	0.225501	0.0654396	0.0863723		-0.383172	0.191482	-0.28309	0.362928
1516	-0.046749	0.227436	0.0654678	0.0871027		-0.383081	0.191531	-0.280797	0.362439
1517	-0.0451503	0.229404	0.0654676	0.0878266		-0.38299	0.191578	-0.278526	0.361945
1518	-0.0434972	0.231404	0.0654398	0.0885439		-0.3829	0.19162	-0.276277	0.361446
1519	-0.0417903	0.233437	0.0653849	0.0892544		-0.382811	0.191657	-0.274051	0.360944
1520	-0.0400304	0.2355	0.0653036	0.0899579		-0.382722	0.19169	-0.271848	0.360438
1521	-0.0382183	0.237594	0.0651967	0.0906544		-0.382634	0.191717	-0.269666	0.359929
1522	-0.0363549	0.239717	0.0650647	0.0913438		-0.382547	0.191738	-0.267508	0.359418
1523	-0.0344412	0.241868	0.0649084	0.0920259		-0.38246	0.191754	-0.265372	0.358904
1524	-0.0324781	0.244048	0.0647287	0.0927007		-0.382373	0.191763	-0.263258	0.358388
1525	-0.0304669	0.246254	0.0645262	0.0933682		-0.382287	0.191765	-0.261166	0.357871
1526	-0.0284087	0.248485	0.0643017	0.0940284		-0.382202	0.191759	-0.259097	0.357352
1527	-0.0263047	0.250741	0.0640559	0.0946814		-0.382116	0.191746	-0.257049	0.356833
1528	-0.0241563	0.25302	0.0637897	0.0953271		-0.382031	0.191725	-0.255023	0.356314
1529	-0.0219647	0.255322	0.0635038	0.0959657		-0.381946	0.191695	-0.253019	0.355794
1530	-0.0197315	0.257644	0.0631991	0.0965973		-0.38186	0.191657	-0.251037	0.355275
1531	-0.0174579	0.259985	0.0628762	0.097222		-0.381774	0.191609	-0.249075	0.354756
1532	-0.0151455	0.262345	0.062536	0.0978399		-0.381687	0.191552	-0.247134	0.354238
1533	-0.0127957	0.264721	0.0621794	0.0984512		-0.381599	0.191484	-0.245214	0.35372
1534	-0.01041	0.267113	0.0618071	0.0990562		-0.38151	0.191406	-0.243314	0.353204
1535	-0.00798992	0.269518	0.06142	0.099655		-0.38142	0.191318	-0.241435	0.35269
1536	-0.00553691	0.271936	0.0610189	0.100248		-0.381328	0.191218	-0.239574	0.352177
1537	-0.00305252	0.274364	0.0606047	0.100835		-0.381235	0.191107	-0.237733	0.351667
1538	-0.000538295	0.276801	0.0601784	0.101417		-0.38114	0.190984	-0.235911	0.351159
1539	0.00200423	0.279246	0.0597409	0.101993		-0.381042	0.190849	-0.234107	0.350653
1540	0.00457352	0.281696	0.059293	0.102565		-0.380942	0.190701	-0.23232	0.35015
1541	0.00716806	0.28415	0.0588357	0.103132		-0.380839	0.190541	-0.230551	0.349649
1542	0.00978632	0.286607	0.0583699	0.103695		-0.380732	0.190368	-0.228799	0.349152
1543	0.0124268	0.289064	0.0578967	0.104254		-0.380622	0.190182	-0.227062	0.348658
1544	0.0150881	0.291521	0.0574171	0.104809		-0.380509	0.189983	-0.225341	0.348167
1545	0.0177687	0.293975	0.0569319	0.105361		-0.380391	0.189771	-0.223635	0.34768
1546	0.0204672	0.296424	0.0564423	0.105909		-0.380269	0.189544	-0.221943	0.347197
1547	0.0231822	0.298867	0.0559492	0.106455		-0.380142	0.189305	-0.220264	0.346717
1548	0.0259125	0.301303	0.0554538	0.106998		-0.380011	0.189051	-0.218597	0.346242
1549	0.0286565	0.303729	0.054957	0.10754		-0.379874	0.188783	-0.216943	0.34577
1550	0.0314131	0.306144	0.0544598	0.108079		-0.379731	0.188501	-0.215299	0.345303
1551	0.034181	0.308547	0.0539633	0.108617		-0.379583	0.188205	-0.213666	0.34484
1552	0.0369589	0.310935	0.0534685	0.109153		-0.379429	0.187896	-0.212043	0.344381
1553	0.0397455	0.313308	0.0529764	0.109688		-0.379268	0.187571	-0.210428	0.343927
1554	0.0425397	0.315663	0.052488	0.110223		-0.379101	0.187233	-0.208822	0.343478
1555	0.0453402	0.318	0.0520043	0.110757		-0.378926	0.186881	-0.207223	0.343033
1556	0.048146	0.320317	0.0515264	0.111291		-0.378743	0.186514	-0.205631	0.342593
1557	0.0509558	0.322612	0.0510553	0.111826		-0.378553	0.186133	-0.204045	0.342158
1558	0.0537686	0.324884	0.050592	0.11236		-0.378354	0.185739	-0.202465	0.341728
1559	0.0565834	0.327132	0.0501374	0.112894		-0.378146	0.185329	-0.200889	0.341304
1560	0.0593989	0.329354	0.0496927	0.11343		-0.377928	0.184906	-0.199317	0.340884
1561	0.0622143	0.33155	0.0492588	0.113966		-0.377701	0.184468	-0.197748	0.340471
1562	0.0650285	0.333718	0.0488366	0.114503		-0.377463	0.184016	-0.196182	0.340062
1563	0.0678406	0.335857	0.0484271	0.115041		-0.377215	0.18355	-0.194618	0.33966
1564	0.0706496	0.337966	0.0480313	0.115581		-0.376955	0.18307	-0.193056	0.339263
1565	0.0734546	0.340044	0.04765	0.116122		-0.376684	0.182575	-0.191494	0.338873
1566	0.0762549	0.34209	0.0472842	0.116665		-0.376401	0.182066	-0.189933	0.338488
1567	0.0790495	0.344103	0.0469349	0.11721		-0.376106	0.181543	-0.188372	0.33811
1568	0.0818377	0.346083	0.0466028	0.117756		-0.375799	0.181005	-0.18681	0.337738
1569	0.0846187	0.348028	0.046289	0.118305		-0.375478	0.180454	-0.185247	0.337373
1570	0.0873916	0.349938	0.0459943	0.118855		-0.375144	0.179888	-0.183681	0.337014
1571	0.0901558	0.351813	0.0457196	0.119408		-0.374797	0.179308	-0.182114	0.336662
1572	0.0929104	0.35365	0.0454659	0.119963		-0.374436	0.178714	-0.180544	0.336317
1573	0.0956547	0.355451	0.0452339	0.12052		-0.37406	0.178107	-0.178971	0.335978
1574	0.0983879	0.357213	0.0450246	0.121079		-0.373671	0.177486	-0.177394	0.335646
1575	0.101109	0.358938	0.0448388	0.121641		-0.373267	0.176852	-0.175813	0.335322
1576	0.103818	0.360623	0.0446773	0.122204		-0.372848	0.176204	-0.174227	0.335005
1577	0.106514	0.36227	0.0445409	0.12277		-0.372414	0.175544	-0.172636	0.334695
1578	0.109196	0.363876	0.0444305	0.123338		-0.371965	0.17487	-0.17104	0.334392
1579	0.111863	0.365443	0.0443467	0.123907		-0.371501	0.174185	-0.169437	0.334097
1580	0.114514	0.36697	0.0442904	0.124479		-0.371022	0.173488	-0.167829	0.333809
1581	0.117149	0.368456	0.0442622	0.125052		-0.370527	0.172779	-0.166214	0.333529
1582	0.119768	0.369901	0.0442629	0.125627		-0.370017	0.172058	-0.164592	0.333257
1583	0.122368	0.371305	0.0442932	0.126204		-0.369491	0.171327	-0.162964	0.332993
1584	0.12495	0.372667	0.0443535	0.126781		-0.36895	0.170586	-0.161327	0.332737
1585	0.127513	0.373988	0.0444447	0.12736		-0.368393	0.169835	-0.159684	0.332489
1586	0.130056	0.375268	0.0445671	0.12794		-0.367821	0.169075	-0.158032	0.332249
1587	0.132577	0.376506	0.0447212	0.128521		-0.367234	0.168306	-0.156373	0.332018
1588	0.135077	0.377701	0.0449076	0.129103		-0.366632	0.167529	-0.154706	0.331796
1589	0.137555	0.378855	0.0451265	0.129685		-0.366015	0.166744	-0.153032	0.331582
1590	0.140009	0.379967	0.0453784	0.130268		-0.365383	0.165953	-0.151349	0.331378
1591	0.142439	0.381036	0.0456635	0.13085		-0.364738	0.165155	-0.149659	0.331183
1592	0.144844	0.382064	0.0459821	0.131432		-0.364079	0.164351	-0.147962	0.330997
1593	0.147223	0.383049	0.0463342	0.132014		-0.363407	0.163542	-0.146257	0.33082
1594	0.149575	0.383991	0.0467202	0.132596		-0.362722	0.162728	-0.144545	0.330653
1595	0.1519	0.384892	0.0471399	0.133177		-0.362024	0.161911	-0.142827	0.330496
1596	0.154196	0.385751	0.0475933	0.133756		-0.361315	0.16109	-0.141102	0.33035
1597	0.156463	0.386568	0.0480805	0.134334		-0.360595	0.160267	-0.139372	0.330213
1598	0.158699	0.387343	0.0486011	0.134911		-0.359863	0.159442	-0.137636	0.330087
1599	0.160905	0.388076	0.0491551	0.135486		-0.359122	0.158616	-0.135896	0.329971
1600	0.163079	0.388768	0.0497421	0.136059		-0.358372	0.157789	-0.134151	0.329866
1601	0.16522	0.389419	0.0503617	0.136629		-0.357612	0.156963	-0.132403	0.329772
1602	0.167328	0.390029	0.0510136	0.137197		-0.356845	0.156137	-0.130652	0.32969
1603	0.169402	0.390599	0.0516972	0.137761		-0.35607	0.155313	-0.128898	0.329618
1604	0.171441	0.391128	0.0524119	0.138322		-0.355289	0.154492	-0.127142	0.329558
1605	0.173444	0.391617	0.0531572	0.138879		-0.354501	0.153673	-0.125386	0.329509
1606	0.175411	0.392067	0.0539323	0.139431		-0.353709	0.152859	-0.123629	0.329472
1607	0.177341	0.392478	0.0547364	0.13998		-0.352912	0.152049	-0.121872	0.329446
1608	0.179234	0.392851	0.0555688	0.140523		-0.352111	0.151245	-0.120117	0.329432
1609	0.18109	0.393185	0.0564286	0.141061		-0.351307	0.150446	-0.118363	0.32943
1610	0.182906	0.393482	0.057315	0.141594		-0.350501	0.149654	-0.116612	0.329439
1611	0.184684	0.393743	0.0582269	0.14212		-0.349693	0.148869	-0.114864	0.329459
1612	0.186422	0.393967	0.0591635	0.142641		-0.348884	0.148093	-0.113121	0.329491
1613	0.188121	0.394156	0.0601237	0.143154		-0.348073	0.147325	-0.111382	0.329534
1614	0.189779	0.39431	0.0611065	0.143661		-0.347262	0.146566	-0.109649	0.329589
1615	0.191397	0.39443	0.0621109	0.14416		-0.346451	0.145818	-0.107923	0.329654
1616	0.192974	0.394516	0.0631356	0.144651		-0.34564	0.14508	-0.106203	0.329731
1617	0.19451	0.39457	0.0641796	0.145135		-0.344829	0.144353	-0.104492	0.329818
1618	0.196005	0.394592	0.0652417	0.14561		-0.344019	0.143638	-0.10279	0.329915
1619	0.197458	0.394583	0.0663206	0.146076		-0.34321	0.142936	-0.101096	0.330023
1620	0.19887	0.394544	0.0674151	0.146534		-0.342402	0.142246	-0.0994136	0.330141
1621	0.20024	0.394475	0.0685238	0.146982		-0.341595	0.14157	-0.0977419	0.330268
1622	0.201568	0.394377	0.0696454	0.14742		-0.34079	0.140908	-0.096082	0.330405
1623	0.202854	0.394251	0.0707785	0.147849		-0.339986	0.14026	-0.0944346	0.330551
1624	0.204098	0.394098	0.0719218	0.148268		-0.339185	0.139627	-0.0928007	0.330706
1625	0.2053	0.393919	0.0730738	0.148676		-0.338385	0.13901	-0.0911808	0.330869
1626	0.20646	0.393714	0.074233	0.149073		-0.337587	0.138407	-0.0895759	0.331041
1627	0.207578	0.393484	0.075398	0.14946		-0.336792	0.137821	-0.0879865	0.331219
1628	0.208654	0.393231	0.0765673	0.149835		-0.336	0.137251	-0.0864135	0.331406
1629	0.209689	0.392954	0.0777395	0.150198		-0.335209	0.136698	-0.0848576	0.331599
1630	0.210682	0.392655	0.078913	0.15055		-0.334422	0.136162	-0.0833194	0.331798
1631	0.211633	0.392336	0.0800865	0.150889		-0.333637	0.135642	-0.0817998	0.332004
1632	0.212543	0.391995	0.0812585	0.151216		-0.332855	0.13514	-0.0802994	0.332215
1633	0.213412	0.391635	0.0824275	0.151531		-0.332076	0.134655	-0.0788189	0.332432
1634	0.214241	0.391257	0.083592	0.151832		-0.331298	0.134187	-0.0773591	0.332653
1635	0.215029	0.39086	0.0847507	0.15212		-0.330523	0.133738	-0.0759207	0.332878
1636	0.215777	0.390447	0.0859021	0.152395		-0.32975	0.133306	-0.0745044	0.333107
1637	0.216486	0.390018	0.0870449	0.152656		-0.328979	0.132891	-0.0731108	0.333339
1638	0.217156	0.389573	0.0881776	0.152904		-0.328209	0.132495	-0.0717406	0.333575
1639	0.217787	0.389114	0.0892988	0.153137		-0.327441	0.132116	-0.0703945	0.333812
1640	0.218381	0.388642	0.0904074	0.153356		-0.326673	0.131755	-0.069073	0.334051
1641	0.218937	0.388156	0.0915019	0.15356		-0.325905	0.131412	-0.0677768	0.334291
1642	0.219456	0.387659	0.0925811	0.15375		-0.325137	0.131086	-0.0665063	0.334532
1643	0.219939	0.387151	0.0936437	0.153924		-0.324368	0.130778	-0.0652621	0.334774
1644	0.220386	0.386632	0.0946885	0.154084		-0.323599	0.130487	-0.0640447	0.335014
1645	0.220799	0.386104	0.0957143	0.154229		-0.322827	0.130213	-0.0628546	0.335254
1646	0.221178	0.385566	0.0967199	0.154359		-0.322054	0.129957	-0.0616921	0.335493
1647	0.221522	0.385021	0.0977041	0.154473		-0.321277	0.129718	-0.0605579	0.335729
1648	0.221835	0.384467	0.0986659	0.154572		-0.320496	0.129495	-0.0594521	0.335963
1649	0.222115	0.383907	0.0996042	0.154655		-0.319711	0.129289	-0.0583751	0.336193
1650	0.222363	0.383341	0.100518	0.154724		-0.31892	0.1291	-0.0573273	0.33642
1651	0.222582	0.382768	0.101406	0.154776		-0.318124	0.128927	-0.0563089	0.336643
1652	0.22277	0.382191	0.102268	0.154814		-0.317319	0.12877	-0.05532	0.336861
1653	0.22293	0.381608	0.103103	0.154836		-0.316507	0.128629	-0.0543609	0.337075
1654	0.223061	0.381022	0.10391	0.154843		-0.315686	0.128503	-0.0534315	0.337282
1655	0.223166	0.380431	0.104687	0.154835		-0.314855	0.128393	-0.052532	0.337483
1656	0.223244	0.379837	0.105436	0.154813		-0.314012	0.128298	-0.0516622	0.337678
1657	0.223297	0.379241	0.106154	0.154775		-0.313158	0.128218	-0.0508223	0.337865
1658	0.223325	0.378642	0.106841	0.154722		-0.312291	0.128153	-0.0500119	0.338045
1659	0.22333	0.378041	0.107496	0.154655		-0.31141	0.128102	-0.049231	0.338217
1660	0.223312	0.377438	0.10812	0.154573		-0.310515	0.128065	-0.0484793	0.338381
1661	0.223273	0.376835	0.108711	0.154477		-0.309603	0.128042	-0.0477566	0.338536
1662	0.223214	0.376231	0.109268	0.154366		-0.308676	0.128033	-0.0470624	0.338681
1663	0.223134	0.375626	0.109793	0.154242		-0.307731	0.128037	-0.0463965	0.338817
1664	0.223037	0.375021	0.110283	0.154103		-0.306768	0.128055	-0.0457586	0.338943
1665	0.222922	0.374417	0.110739	0.15395		-0.305786	0.128085	-0.045148	0.339058
1666	0.22279	0.373814	0.111161	0.153784		-0.304784	0.128127	-0.0445645	0.339162
1667	0.222643	0.373212	0.111547	0.153604		-0.303762	0.128182	-0.0440075	0.339256
1668	0.222482	0.372611	0.111899	0.153411		-0.302719	0.128248	-0.0434764	0.339338
1669	0.222307	0.372012	0.112216	0.153204		-0.301654	0.128326	-0.0429706	0.339408
1670	0.22212	0.371415	0.112497	0.152984		-0.300566	0.128416	-0.0424896	0.339466
1671	0.221922	0.37082	0.112742	0.152751		-0.299455	0.128516	-0.0420326	0.339512
1672	0.221713	0.370228	0.112952	0.152505		-0.298321	0.128627	-0.0415989	0.339546
1673	0.221495	0.369638	0.113126	0.152247		-0.297163	0.128748	-0.0411877	0.339566
1674	0.221269	0.369052	0.113265	0.151976		-0.295979	0.128879	-0.0407984	0.339573
1675	0.221035	0.368469	0.113368	0.151693		-0.294771	0.129019	-0.0404301	0.339567
1676	0.220795	0.367889	0.113436	0.151398		-0.293537	0.129169	-0.0400819	0.339548
1677	0.22055	0.367313	0.113468	0.151091		-0.292277	0.129328	-0.039753	0.339514
1678	0.2203	0.366741	0.113466	0.150772		-0.290991	0.129496	-0.0394425	0.339467
1679	0.220047	0.366173	0.113428	0.150442		-0.289679	0.129673	-0.0391495	0.339405
1680	0.219791	0.365609	0.113357	0.150101		-0.28834	0.129858	-0.0388732	0.33933
1681	0.219534	0.365049	0.113252	0.14975		-0.286975	0.130052	-0.0386125	0.33924
1682	0.219276	0.364494	0.113113	0.149388		-0.285583	0.130253	-0.0383667	0.339136
1683	0.219018	0.363944	0.112942	0.149015		-0.284164	0.130462	-0.0381347	0.339017
1684	0.218761	0.363398	0.112738	0.148633		-0.282718	0.130679	-0.0379156	0.338884
1685	0.218506	0.362856	0.112503	0.148242		-0.281246	0.130903	-0.0377086	0.338736
1686	0.218254	0.36232	0.112238	0.147842		-0.279747	0.131135	-0.0375126	0.338574
1687	0.218005	0.361789	0.111942	0.147433		-0.278221	0.131374	-0.0373269	0.338397
1688	0.21776	0.361263	0.111617	0.147016		-0.276668	0.131619	-0.0371504	0.338206
1689	0.21752	0.360743	0.111263	0.146591		-0.275088	0.131872	-0.0369822	0.338
1690	0.217286	0.360227	0.110882	0.14616		-0.273483	0.132132	-0.0368215	0.33778
1691	0.217057	0.359718	0.110474	0.145721		-0.27185	0.132398	-0.0366674	0.337545
1692	0.216836	0.359214	0.11004	0.145277		-0.270192	0.132671	-0.0365189	0.337296
1693	0.216622	0.358715	0.109582	0.144827		-0.268508	0.13295	-0.0363751	0.337033
1694	0.216416	0.358223	0.1091	0.144371		-0.266798	0.133235	-0.0362352	0.336756
1695	0.216218	0.357736	0.108595	0.143912		-0.265062	0.133527	-0.0360984	0.336465
1696	0.21603	0.357255	0.108068	0.143448		-0.263302	0.133825	-0.0359637	0.336161
1697	0.215851	0.35678	0.107521	0.142982		-0.261516	0.134128	-0.0358305	0.335842
1698	0.215682	0.35631	0.106955	0.142513		-0.259705	0.134438	-0.0356979	0.335511
1699	0.215523	0.355847	0.10637	0.142042		-0.257869	0.134753	-0.0355651	0.335166
1700	0.215375	0.355389	0.105768	0.141569		-0.256009	0.135075	-0.0354314	0.334808
1701	0.215239	0.354937	0.10515	0.141096		-0.254125	0.135401	-0.0352962	0.334437
1702	0.215114	0.354491	0.104517	0.140623		-0.252216	0.135734	-0.0351587	0.334054
1703	0.215001	0.35405	0.10387	0.140151		-0.250284	0.136072	-0.0350183	0.333658
1704	0.2149	0.353615	0.103211	0.13968		-0.248327	0.136416	-0.0348744	0.333251
1705	0.214811	0.353186	0.102539	0.139211		-0.246346	0.136765	-0.0347266	0.332831
1706	0.214735	0.352762	0.101857	0.138745		-0.244342	0.137119	-0.0345742	0.332399
1707	0.214672	0.352344	0.101165	0.138283		-0.242314	0.13748	-0.0344169	0.331957
1708	0.214622	0.35193	0.100465	0.137824		-0.240263	0.137846	-0.0342543	0.331502
1709	0.214585	0.351523	0.0997572	0.137371		-0.238189	0.138217	-0.0340858	0.331037
1710	0.214562	0.35112	0.0990425	0.136922		-0.236091	0.138594	-0.0339113	0.330561
1711	0.214553	0.350723	0.0983222	0.13648		-0.23397	0.138977	-0.0337303	0.330075
1712	0.214558	0.350331	0.0975971	0.136044		-0.231827	0.139366	-0.0335426	0.329579
1713	0.214578	0.349944	0.0968682	0.135615		-0.22966	0.13976	-0.0333479	0.329072
1714	0.214611	0.349563	0.0961363	0.135194		-0.227471	0.140161	-0.033146	0.328556
1715	0.21466	0.349186	0.0954024	0.134782		-0.225259	0.140567	-0.0329367	0.32803
1716	0.214723	0.348815	0.0946672	0.134378		-0.223024	0.140978	-0.0327198	0.327495
1717	0.214802	0.348449	0.0939316	0.133983		-0.220767	0.141396	-0.0324953	0.326951
1718	0.214895	0.348089	0.0931961	0.133599		-0.218487	0.14182	-0.032263	0.326398
1719	0.215004	0.347733	0.0924617	0.133225		-0.216185	0.14225	-0.0320228	0.325837
1720	0.215129	0.347383	0.0917288	0.132861		-0.213862	0.142685	-0.0317749	0.325268
1721	0.215269	0.347038	0.0909983	0.132509		-0.211516	0.143127	-0.0315191	0.324691
1722	0.215425	0.346699	0.0902706	0.132169		-0.209148	0.143575	-0.0312556	0.324106
1723	0.215598	0.346365	0.0895465	0.131841		-0.206759	0.144028	-0.0309844	0.323515
1724	0.215786	0.346036	0.0888264	0.131525		-0.204348	0.144488	-0.0307057	0.322915
1725	0.215991	0.345713	0.088111	0.131222		-0.201916	0.144954	-0.0304197	0.32231
1726	0.216212	0.345395	0.0874008	0.130932		-0.199463	0.145425	-0.0301266	0.321697
1727	0.216449	0.345082	0.0866963	0.130655		-0.196989	0.145903	-0.0298266	0.321079
1728	0.216702	0.344775	0.085998	0.130392		-0.194494	0.146387	-0.02952	0.320455
1729	0.216972	0.344473	0.0853066	0.130143		-0.19198	0.146877	-0.0292071	0.319825
1730	0.217259	0.344177	0.0846226	0.129908		-0.189445	0.147372	-0.0288881	0.319189
1731	0.217561	0.343887	0.0839463	0.129687		-0.18689	0.147874	-0.0285634	0.318549
1732	0.21788	0.343602	0.0832784	0.12948		-0.184317	0.148382	-0.0282333	0.317904
1733	0.218215	0.343324	0.0826193	0.129287		-0.181724	0.148895	-0.0278982	0.317254
1734	0.218566	0.343051	0.0819693	0.129108		-0.179112	0.149414	-0.0275585	0.3166
1735	0.218933	0.342784	0.081329	0.128943		-0.176482	0.149939	-0.0272146	0.315942
1736	0.219316	0.342523	0.0806986	0.128792		-0.173834	0.15047	-0.0268668	0.315281
1737	0.219715	0.342269	0.0800786	0.128655		-0.171168	0.151006	-0.0265155	0.314616
1738	0.220129	0.342022	0.0794693	0.128532		-0.168485	0.151548	-0.0261612	0.313948
1739	0.220559	0.341781	0.078871	0.128423		-0.165785	0.152095	-0.0258042	0.313278
1740	0.221005	0.341547	0.078284	0.128327		-0.163069	0.152647	-0.025445	0.312605
1741	0.221466	0.341321	0.0777086	0.128245		-0.160337	0.153205	-0.025084	0.31193
1742	0.221942	0.341102	0.0771451	0.128175		-0.157588	0.153767	-0.0247214	0.311253
1743	0.222433	0.34089	0.0765938	0.128118		-0.154825	0.154335	-0.0243577	0.310575
1744	0.22294	0.340687	0.0760549	0.128074		-0.152047	0.154907	-0.0239933	0.309896
1745	0.223461	0.340492	0.0755286	0.128042		-0.149254	0.155484	-0.0236285	0.309215
1746	0.223998	0.340306	0.0750153	0.128022		-0.146447	0.156066	-0.0232636	0.308535
1747	0.22455	0.340128	0.0745152	0.128014		-0.143626	0.156652	-0.022899	0.307853
1748	0.225117	0.33996	0.0740286	0.128016		-0.140793	0.157243	-0.0225348	0.307172
1749	0.225699	0.339801	0.0735557	0.12803		-0.137947	0.157838	-0.0221715	0.306491
1750	0.226295	0.339652	0.0730969	0.128055		-0.135088	0.158438	-0.0218092	0.305811
1751	0.226907	0.339513	0.0726524	0.128089		-0.132219	0.159042	-0.0214481	0.305131
1752	0.227533	0.339385	0.0722225	0.128134		-0.129338	0.159649	-0.0210886	0.304452
1753	0.228175	0.339267	0.0718076	0.128188		-0.126447	0.160261	-0.0207309	0.303774
1754	0.228831	0.339161	0.0714079	0.12825		-0.123546	0.160877	-0.020375	0.303098
1755	0.229502	0.339065	0.0710238	0.128322		-0.120636	0.161497	-0.0200211	0.302423
1756	0.230187	0.338982	0.0706556	0.128401		-0.117718	0.16212	-0.0196695	0.301751
1757	0.230887	0.338911	0.0703035	0.128488		-0.114791	0.162747	-0.0193202	0.30108
1758	0.231602	0.338852	0.0699679	0.128583		-0.111858	0.163378	-0.0189733	0.300412
1759	0.232331	0.338806	0.069649	0.128684		-0.108918	0.164012	-0.0186291	0.299747
1760	0.233075	0.338773	0.0693471	0.128791		-0.105973	0.16465	-0.0182876	0.299084
1761	0.233833	0.338753	0.0690625	0.128904		-0.103023	0.16529	-0.017949	0.298425
1762	0.234605	0.338748	0.0687953	0.129023		-0.100068	0.165935	-0.0176134	0.297768
1763	0.235391	0.338756	0.0685457	0.129147		-0.09711	0.166582	-0.017281	0.297115
1764	0.236191	0.338779	0.0683139	0.129275		-0.0941495	0.167232	-0.0169518	0.296466
1765	0.237005	0.338816	0.0681002	0.129408		-0.0911873	0.167885	-0.0166261	0.295821
1766	0.237831	0.338868	0.0679047	0.129544		-0.0882242	0.16854	-0.016304	0.29518
1767	0.238671	0.338936	0.0677275	0.129683		-0.0852613	0.169198	-0.0159856	0.294543
1768	0.239524	0.339019	0.0675687	0.129826		-0.0822993	0.169859	-0.0156711	0.29391
1769	0.240389	0.339118	0.0674286	0.129971		-0.0793394	0.170521	-0.0153606	0.293282
1770	0.241266	0.339234	0.067307	0.130118		-0.0763826	0.171186	-0.0150544	0.292659
1771	0.242155	0.339365	0.0672042	0.130267		-0.0734299	0.171852	-0.0147527	0.292041
1772	0.243056	0.339513	0.06712	0.130417		-0.0704823	0.17252	-0.0144557	0.291428
1773	0.243968	0.339678	0.0670545	0.130568		-0.0675411	0.173189	-0.0141638	0.29082
1774	0.244891	0.33986	0.0670076	0.13072		-0.0646072	0.17386	-0.0138771	0.290218
1775	0.245825	0.340059	0.0669791	0.130873		-0.0616818	0.174531	-0.0135962	0.289621
1776	0.246769	0.340276	0.066969	0.131025		-0.0587661	0.175204	-0.0133213	0.28903
1777	0.247722	0.340509	0.0669771	0.131177		-0.0558612	0.175877	-0.0130529	0.288444
1778	0.248685	0.340761	0.0670032	0.131329		-0.0529683	0.176551	-0.0127914	0.287864
1779	0.249656	0.34103	0.0670471	0.13148		-0.0500886	0.177225	-0.0125373	0.28729
1780	0.250636	0.341317	0.0671084	0.131629		-0.0472235	0.177899	-0.012291	0.286722
1781	0.251624	0.341622	0.067187	0.131777		-0.0443743	0.178573	-0.012053	0.286159
1782	0.252619	0.341945	0.0672824	0.131923		-0.0415423	0.179247	-0.0118239	0.285602
1783	0.253621	0.342285	0.0673943	0.132066		-0.038729	0.17992	-0.0116043	0.285052
1784	0.254629	0.342644	0.0675222	0.132208		-0.0359357	0.180593	-0.0113948	0.284507
1785	0.255643	0.343021	0.0676657	0.132347		-0.0331639	0.181266	-0.011196	0.283968
1786	0.256662	0.343416	0.0678243	0.132482		-0.0304151	0.181937	-0.0110086	0.283436
1787	0.257685	0.343829	0.0679974	0.132615		-0.0276908	0.182607	-0.0108334	0.282909
1788	0.258712	0.344259	0.0681844	0.132744		-0.0249924	0.183276	-0.010671	0.282387
1789	0.259742	0.344708	0.0683846	0.13287		-0.0223216	0.183944	-0.0105223	0.281872
1790	0.260775	0.345173	0.0685974	0.132991		-0.0196799	0.184611	-0.010388	0.281362
1791	0.261809	0.345656	0.068822	0.133109		-0.0170689	0.185276	-0.0102689	0.280857
1792	0.262845	0.346156	0.0690575	0.133222		-0.01449	0.185939	-0.0101658	0.280358
1793	0.263881	0.346673	0.0693029	0.13333		-0.011945	0.186601	-0.0100794	0.279864
1794	0.264917	0.347206	0.0695574	0.133434		-0.0094352	0.187261	-0.0100107	0.279375
1795	0.265953	0.347755	0.0698199	0.133532		-0.00696232	0.187919	-0.00996029	0.278891
1796	0.266987	0.348321	0.0700892	0.133626		-0.00452788	0.188576	-0.00992899	0.278411
1797	0.26802	0.348901	0.0703642	0.133714		-0.00213343	0.18923	-0.00991752	0.277936
1798	0.26905	0.349497	0.0706437	0.133796		0.000219473	0.189883	-0.00992658	0.277465
1799	0.270077	0.350108	0.0709263	0.133873		0.0025293	0.190534	-0.00995688	0.276998
1800	0.271101	0.350733	0.0712107	0.133943		0.00479452	0.191183	-0.0100091	0.276535
1801	0.272121	0.351373	0.0714955	0.134008		0.00701362	0.191829	-0.010084	0.276075
1802	0.273135	0.352025	0.0717793	0.134067		0.00918512	0.192474	-0.0101823	0.275618
1803	0.274145	0.35269	0.0720605	0.13412		0.0113076	0.193116	-0.0103047	0.275164
1804	0.275149	0.353368	0.0723377	0.134166		0.0133796	0.193756	-0.0104521	0.274712
1805	0.276146	0.354058	0.0726094	0.134206		0.0153998	0.194394	-0.010625	0.274263
1806	0.277136	0.354759	0.072874	0.13424		0.0173669	0.195029	-0.0108243	0.273815
1807	0.278118	0.35547	0.0731298	0.134268		0.0192796	0.195661	-0.0110508	0.27337
1808	0.279092	0.356192	0.0733754	0.134289		0.0211367	0.19629	-0.011305	0.272925
1809	0.280057	0.356923	0.0736091	0.134304		0.022937	0.196916	-0.0115877	0.272482
1810	0.281012	0.357662	0.0738293	0.134312		0.0246795	0.197539	-0.0118996	0.272039
1811	0.281956	0.35841	0.0740344	0.134315		0.0263629	0.198159	-0.0122411	0.271597
1812	0.282889	0.359165	0.0742226	0.134311		0.0279863	0.198775	-0.012613	0.271155
1813	0.28381	0.359926	0.0743925	0.134302		0.0295488	0.199386	-0.0130159	0.270713
1814	0.284718	0.360694	0.0745423	0.134287		0.0310494	0.199994	-0.0134503	0.270271
1815	0.285612	0.361466	0.0746703	0.134266		0.0324871	0.200597	-0.013917	0.269828
1816	0.286492	0.362242	0.074775	0.13424		0.0338612	0.201196	-0.0144164	0.269385
1817	0.287357	0.363022	0.0748547	0.134209		0.0351709	0.201789	-0.0149491	0.26894
1818	0.288205	0.363804	0.0749077	0.134172		0.0364153	0.202377	-0.0155157	0.268494
1819	0.289035	0.364588	0.0749323	0.134132		0.0375937	0.202959	-0.0161165	0.268048
1820	0.289847	0.365372	0.0749269	0.134087		0.0387054	0.203536	-0.0167522	0.267599
1821	0.29064	0.366156	0.07489	0.134038		0.0397497	0.204106	-0.0174231	0.26715
1822	0.291412	0.366938	0.07482	0.133985		0.040726	0.204669	-0.0181296	0.266698
1823	0.292163	0.367718	0.0747152	0.133928		0.0416336	0.205225	-0.0188722	0.266245
1824	0.29289	0.368495	0.0745743	0.133869		0.0424721	0.205774	-0.0196511	0.265791
1825	0.293594	0.369267	0.0743956	0.133806		0.0432407	0.206315	-0.0204668	0.265335
1826	0.294273	0.370033	0.0741777	0.133741		0.0439392	0.206848	-0.0213196	0.264877
1827	0.294925	0.370793	0.0739192	0.133674		0.0445669	0.207373	-0.0222098	0.264417
1828	0.295549	0.371545	0.0736187	0.133605		0.0451234	0.207889	-0.0231377	0.263957
1829	0.296146	0.372289	0.0732747	0.133534		0.0456085	0.208395	-0.0241035	0.263494
1830	0.296712	0.373023	0.072886	0.133463		0.0460215	0.208892	-0.0251075	0.263031
1831	0.297248	0.373748	0.0724511	0.13339		0.0463623	0.209379	-0.0261499	0.262566
1832	0.297753	0.374462	0.0719689	0.133317		0.0466304	0.209856	-0.0272309	0.262101
1833	0.298226	0.375164	0.0714379	0.133243		0.0468256	0.210322	-0.0283507	0.261635
1834	0.298666	0.375855	0.0708571	0.13317		0.0469476	0.210777	-0.0295096	0.261168
1835	0.299073	0.376533	0.0702252	0.133097		0.0469962	0.211222	-0.0307076	0.260701
1836	0.299447	0.377199	0.0695409	0.133026		0.0469712	0.211654	-0.0319449	0.260233
1837	0.299786	0.377852	0.0688033	0.132955		0.0468723	0.212075	-0.0332216	0.259766
1838	0.300092	0.378491	0.0680112	0.132887		0.0466995	0.212484	-0.0345379	0.2593
1839	0.300363	0.379117	0.0671635	0.13282		0.0464526	0.212881	-0.0358937	0.258835
1840	0.300601	0.37973	0.0662593	0.132756		0.0461316	0.213265	-0.037289	0.25837
1841	0.300804	0.380329	0.0652974	0.132695		0.0457366	0.213637	-0.038724	0.257907
1842	0.300973	0.380915	0.064277	0.132637		0.0452675	0.213995	-0.0401984	0.257447
1843	0.301109	0.381488	0.0631972	0.132584		0.0447245	0.21434	-0.0417123	0.256988
1844	0.301212	0.382047	0.0620571	0.132534		0.0441078	0.214672	-0.0432655	0.256532
1845	0.301282	0.382592	0.0608558	0.132489		0.0434176	0.214991	-0.0448577	0.25608
1846	0.301321	0.383125	0.0595927	0.132449		0.0426541	0.215295	-0.0464887	0.255631
1847	0.301327	0.383645	0.058267	0.132415		0.0418178	0.215586	-0.0481582	0.255186
1848	0.301303	0.384152	0.0568781	0.132386		0.0409089	0.215863	-0.0498659	0.254746
1849	0.30125	0.384647	0.0554255	0.132364		0.0399279	0.216126	-0.0516111	0.254311
1850	0.301167	0.38513	0.0539086	0.132349		0.0388752	0.216376	-0.0533934	0.253881
1851	0.301056	0.385601	0.052327	0.132341		0.0377512	0.216611	-0.0552121	0.253458
1852	0.300917	0.386061	0.0506805	0.132341		0.0365566	0.216832	-0.0570664	0.25304
1853	0.300753	0.386511	0.0489688	0.13235		0.0352918	0.217039	-0.0589554	0.25263
1854	0.300563	0.38695	0.0471916	0.132367		0.0339575	0.217233	-0.0608784	0.252227
1855	0.30035	0.387379	0.0453491	0.132393		0.0325544	0.217412	-0.0628343	0.251832
1856	0.300113	0.387799	0.0434411	0.132429		0.0310833	0.217578	-0.0648221	0.251445
1857	0.299856	0.38821	0.0414678	0.132475		0.0295449	0.21773	-0.0668406	0.251066
1858	0.299577	0.388614	0.0394295	0.132531		0.0279403	0.217869	-0.0688888	0.250697
1859	0.29928	0.389009	0.0373263	0.132599		0.0262703	0.217995	-0.0709654	0.250337
1860	0.298965	0.389398	0.0351587	0.132678		0.024536	0.218108	-0.0730693	0.249986
1861	0.298634	0.38978	0.032927	0.132769		0.0227383	0.218208	-0.0751991	0.249646
1862	0.298288	0.390157	0.0306319	0.132873		0.0208786	0.218296	-0.0773534	0.249317
1863	0.297928	0.39053	0.028274	0.13299		0.0189578	0.218371	-0.0795309	0.248998
1864	0.297556	0.390897	0.025854	0.13312		0.0169774	0.218434	-0.0817301	0.24869
1865	0.297174	0.391262	0.0233726	0.133264		0.0149387	0.218486	-0.0839495	0.248393
1866	0.296782	0.391624	0.0208309	0.133423		0.012843	0.218526	-0.0861873	0.248108
1867	0.296382	0.391983	0.0182297	0.133596		0.0106919	0.218556	-0.088442	0.247834
1868	0.295975	0.392342	0.0155702	0.133785		0.00848689	0.218574	-0.0907118	0.247573
1869	0.295564	0.392699	0.0128535	0.133989		0.0062296	0.218582	-0.0929948	0.247324
1870	0.295149	0.393057	0.0100807	0.13421		0.00392176	0.218581	-0.0952893	0.247087
1871	0.294733	0.393416	0.00725313	0.134447		0.00156517	0.218569	-0.0975931	0.246863
1872	0.294316	0.393776	0.00437212	0.134701		-0.000838298	0.218548	-0.0999044	0.246651
1873	0.293901	0.394138	0.00143907	0.134972		-0.00328667	0.218519	-0.102221	0.246453
1874	0.293489	0.394504	-0.00154454	0.135261		-0.0057779	0.218481	-0.104541	0.246267
1875	0.293081	0.394873	-0.00457719	0.135567		-0.00830986	0.218434	-0.106862	0.246095
1876	0.29268	0.395246	-0.00765726	0.135891		-0.0108804	0.21838	-0.109182	0.245936
1877	0.292287	0.395624	-0.0107831	0.136234		-0.0134871	0.218319	-0.111499	0.245791
1878	0.291905	0.396008	-0.0139529	0.136595		-0.0161279	0.218251	-0.11381	0.245659
1879	0.291534	0.396398	-0.017165	0.136974		-0.0188002	0.218176	-0.116114	0.24554
1880	0.291177	0.396795	-0.0204173	0.137372		-0.0215016	0.218095	-0.118407	0.245435
1881	0.290835	0.3972	-0.0237081	0.137789		-0.0242298	0.218008	-0.120688	0.245344
1882	0.290512	0.397612	-0.0270352	0.138225		-0.0269822	0.217916	-0.122953	0.245267
1883	0.290208	0.398034	-0.0303965	0.13868		-0.0297563	0.217819	-0.125201	0.245203
1884	0.289926	0.398464	-0.03379	0.139153		-0.0325495	0.217718	-0.127428	0.245153
1885	0.289667	0.398905	-0.0372133	0.139645		-0.0353591	0.217612	-0.129633	0.245117
1886	0.289435	0.399355	-0.0406642	0.140156		-0.0381825	0.217503	-0.131812	0.245095
1887	0.28923	0.399817	-0.0441403	0.140686		-0.0410169	0.21739	-0.133964	0.245086
1888	0.289056	0.400291	-0.0476391	0.141233		-0.0438596	0.217275	-0.136084	0.245091
1889	0.288913	0.400776	-0.0511581	0.1418		-0.0467077	0.217157	-0.138172	0.245109
1890	0.288805	0.401274	-0.0546947	0.142384		-0.0495585	0.217037	-0.140223	0.245141
1891	0.288733	0.401786	-0.0582462	0.142986		-0.0524091	0.216915	-0.142236	0.245186
1892	0.2887	0.402311	-0.0618098	0.143605		-0.0552567	0.216792	-0.144207	0.245244
1893	0.288707	0.40285	-0.0653827	0.144241		-0.0580983	0.216668	-0.146134	0.245314
1894	0.288757	0.403405	-0.068962	0.144895		-0.0609311	0.216544	-0.148014	0.245398
1895	0.288852	0.403974	-0.0725447	0.145564		-0.0637521	0.216419	-0.149845	0.245493
1896	0.288994	0.40456	-0.0761275	0.146249		-0.0665586	0.216295	-0.151623	0.2456
1897	0.289184	0.405161	-0.0797075	0.146949		-0.0693475	0.216171	-0.153346	0.245719
1898	0.289427	0.40578	-0.0832812	0.147664		-0.072116	0.216047	-0.15501	0.245849
1899	0.289723	0.406416	-0.0868453	0.148393		-0.0748612	0.215925	-0.156615	0.24599
1900	0.290074	0.407069	-0.0903965	0.149136		-0.0775801	0.215804	-0.158156	0.246142
1901	0.290483	0.407741	-0.0939314	0.149892		-0.08027	0.215684	-0.159631	0.246303
1902	0.290952	0.408431	-0.0974464	0.15066		-0.082928	0.215565	-0.161037	0.246474
1903	0.291482	0.40914	-0.100938	0.151439		-0.085551	0.215449	-0.162372	0.246655
1904	0.292077	0.409868	-0.104403	0.15223		-0.0881364	0.215334	-0.163634	0.246843
1905	0.292737	0.410615	-0.107837	0.15303		-0.0906812	0.215221	-0.164819	0.247041
1906	0.293465	0.411381	-0.111238	0.153839		-0.0931826	0.215111	-0.165926	0.247245
1907	0.294262	0.412167	-0.1146	0.154657		-0.0956378	0.215002	-0.166952	0.247457
1908	0.295131	0.412973	-0.117922	0.155483		-0.098044	0.214896	-0.167895	0.247676
1909	0.296073	0.413798	-0.121199	0.156315		-0.100398	0.214793	-0.168753	0.2479
1910	0.297089	0.414644	-0.124427	0.157152		-0.102699	0.214692	-0.169523	0.248131
1911	0.298181	0.415508	-0.127604	0.157995		-0.104942	0.214594	-0.170204	0.248366
1912	0.299351	0.416393	-0.130724	0.158841		-0.107125	0.214499	-0.170793	0.248605
1913	0.300599	0.417296	-0.133786	0.15969		-0.109246	0.214407	-0.171289	0.248849
1914	0.301927	0.418219	-0.136786	0.160541		-0.111303	0.214318	-0.171691	0.249095
1915	0.303336	0.41916	-0.139719	0.161393		-0.113292	0.214232	-0.171996	0.249345
1916	0.304826	0.420119	-0.142582	0.162245		-0.115213	0.21415	-0.172203	0.249596
1917	0.306399	0.421095	-0.145373	0.163096		-0.117061	0.214071	-0.17231	0.249848
1918	0.308055	0.422089	-0.148087	0.163944		-0.118836	0.213997	-0.172317	0.250101
1919	0.309795	0.423099	-0.150722	0.164789		-0.120536	0.213926	-0.172222	0.250354
1920	0.31162	0.424124	-0.153274	0.16563		-0.122157	0.213859	-0.172025	0.250606
1921	0.313528	0.425163	-0.155739	0.166465		-0.123699	0.213797	-0.171723	0.250856
1922	0.315521	0.426217	-0.158115	0.167295		-0.12516	0.213739	-0.171316	0.251105
1923	0.317598	0.427283	-0.160399	0.168117		-0.126538	0.213686	-0.170805	0.25135
1924	0.319759	0.42836	-0.162588	0.168932		-0.127831	0.213638	-0.170187	0.251592
1925	0.322003	0.429448	-0.164679	0.169737		-0.129038	0.213595	-0.169463	0.251829
1926	0.32433	0.430544	-0.166668	0.170532		-0.130158	0.213558	-0.168632	0.252061
1927	0.32674	0.431648	-0.168554	0.171317		-0.13119	0.213526	-0.167694	0.252287
1928	0.32923	0.432758	-0.170334	0.17209		-0.132132	0.213499	-0.166649	0.252507
1929	0.331801	0.433873	-0.172005	0.17285		-0.132984	0.213479	-0.165497	0.252719
1930	0.334451	0.434992	-0.173566	0.173597		-0.133744	0.213464	-0.164238	0.252923
1931	0.337178	0.436111	-0.175013	0.17433		-0.134413	0.213457	-0.162871	0.253118
1932	0.339981	0.437231	-0.176345	0.175049		-0.134988	0.213455	-0.161399	0.253303
1933	0.34286	0.43835	-0.17756	0.175752		-0.135471	0.21346	-0.15982	0.253478
1934	0.345812	0.439466	-0.178656	0.176439		-0.13586	0.213472	-0.158135	0.253642
1935	0.348835	0.440577	-0.179631	0.177109		-0.136155	0.213491	-0.156346	0.253794
1936	0.35193	0.441683	-0.180484	0.177762		-0.136356	0.213518	-0.154452	0.253933
1937	0.355092	0.442781	-0.181215	0.178397		-0.136463	0.213551	-0.152455	0.25406
1938	0.358322	0.443871	-0.181821	0.179014		-0.136476	0.213592	-0.150356	0.254172
1939	0.361618	0.444951	-0.182301	0.179613		-0.136396	0.21364	-0.148156	0.254271
1940	0.364977	0.446019	-0.182656	0.180192		-0.136222	0.213696	-0.145856	0.254354
1941	0.368398	0.447076	-0.182884	0.180752		-0.135956	0.213759	-0.143458	0.254422
1942	0.37188	0.448118	-0.182984	0.181293		-0.135596	0.213829	-0.140962	0.254475
1943	0.37542	0.449146	-0.182958	0.181813		-0.135145	0.213908	-0.138371	0.254511
1944	0.379016	0.450158	-0.182804	0.182314		-0.134604	0.213993	-0.135686	0.25453
1945	0.382667	0.451153	-0.182523	0.182795		-0.133972	0.214087	-0.132909	0.254532
1946	0.386371	0.45213	-0.182115	0.183255		-0.133251	0.214187	-0.130042	0.254517
1947	0.390125	0.453088	-0.18158	0.183695		-0.132441	0.214295	-0.127087	0.254484
1948	0.393927	0.454025	-0.180919	0.184114		-0.131546	0.214411	-0.124046	0.254433
1949	0.397775	0.454942	-0.180134	0.184512		-0.130565	0.214533	-0.120921	0.254364
1950	0.401667	0.455837	-0.179225	0.184891		-0.1295	0.214663	-0.117715	0.254277
1951	0.4056	0.456709	-0.178193	0.185249		-0.128352	0.214799	-0.11443	0.25417
1952	0.409572	0.457558	-0.177039	0.185586		-0.127124	0.214942	-0.111068	0.254045
1953	0.413581	0.458382	-0.175765	0.185904		-0.125818	0.215092	-0.107632	0.253901
1954	0.417623	0.459182	-0.174373	0.186201		-0.124434	0.215248	-0.104125	0.253738
1955	0.421696	0.459955	-0.172865	0.186479		-0.122976	0.21541	-0.10055	0.253556
1956	0.425797	0.460702	-0.171241	0.186738		-0.121445	0.215578	-0.0969085	0.253354
1957	0.429924	0.461422	-0.169505	0.186978		-0.119844	0.215752	-0.0932045	0.253134
1958	0.434075	0.462115	-0.167658	0.1872		-0.118175	0.215931	-0.0894406	0.252894
1959	0.438245	0.462779	-0.165704	0.187404		-0.116441	0.216116	-0.0856199	0.252635
1960	0.442433	0.463415	-0.163643	0.187591		-0.114644	0.216305	-0.0817454	0.252357
1961	0.446635	0.464021	-0.16148	0.187761		-0.112788	0.216498	-0.0778204	0.25206
1962	0.450849	0.464598	-0.159217	0.187915		-0.110874	0.216696	-0.073848	0.251745
1963	0.455072	0.465144	-0.156856	0.188053		-0.108906	0.216898	-0.0698315	0.25141
1964	0.4593	0.46566	-0.154402	0.188177		-0.106887	0.217103	-0.0657743	0.251058
1965	0.463531	0.466145	-0.151857	0.188288		-0.104819	0.217311	-0.0616799	0.250687
1966	0.467762	0.466598	-0.149226	0.188385		-0.102707	0.217522	-0.0575515	0.250299
1967	0.471989	0.46702	-0.146511	0.188471		-0.100553	0.217736	-0.0533929	0.249893
1968	0.47621	0.46741	-0.143717	0.188545		-0.0983594	0.217951	-0.0492074	0.24947
1969	0.480422	0.467767	-0.140847	0.188609		-0.0961309	0.218167	-0.0449988	0.249031
1970	0.484621	0.468092	-0.137907	0.188665		-0.0938702	0.218384	-0.0407706	0.248575
1971	0.488804	0.468383	-0.134899	0.188712		-0.0915806	0.218601	-0.0365266	0.248103
1972	0.492969	0.468642	-0.131829	0.188752		-0.0892657	0.218818	-0.0322704	0.247617
1973	0.497111	0.468867	-0.128701	0.188786		-0.0869287	0.219034	-0.0280059	0.247115
1974	0.501229	0.469058	-0.12552	0.188815		-0.0845731	0.219249	-0.0237367	0.2466
1975	0.505318	0.469215	-0.122291	0.18884		-0.0822022	0.219462	-0.0194665	0.246072
1976	0.509376	0.469338	-0.119018	0.188862		-0.0798196	0.219672	-0.0151992	0.24553
1977	0.5134	0.469427	-0.115706	0.188882		-0.0774286	0.219879	-0.0109386	0.244977
1978	0.517386	0.469481	-0.11236	0.188902		-0.0750326	0.220082	-0.00668829	0.244413
1979	0.521331	0.4695	-0.108986	0.188922		-0.0726352	0.22028	-0.0024522	0.243839
1980	0.525232	0.469484	-0.105588	0.188944		-0.0702398	0.220473	0.00176596	0.243256
1981	0.529086	0.469433	-0.102172	0.188967		-0.0678497	0.22066	0.00596242	0.242664
1982	0.53289	0.469347	-0.0987421	0.188994		-0.0654683	0.220841	0.0101334	0.242065
1983	0.53664	0.469226	-0.0953043	0.189026		-0.0630991	0.221015	0.0142752	0.241459
1984	0.540334	0.469069	-0.0918634	0.189062		-0.0607452	0.221181	0.0183841	0.240848
1985	0.543969	0.468876	-0.0884248	0.189104		-0.0584102	0.221338	0.0224564	0.240232
1986	0.547542	0.468648	-0.0849935	0.189153		-0.0560971	0.221486	0.0264883	0.239614
1987	0.551049	0.468384	-0.0815745	0.18921		-0.0538093	0.221625	0.0304764	0.238993
1988	0.554488	0.468084	-0.0781731	0.189275		-0.05155	0.221754	0.0344168	0.23837
1989	0.557856	0.467748	-0.0747942	0.189349		-0.0493223	0.221872	0.0383061	0.237748
1990	0.56115	0.467376	-0.0714428	0.189433		-0.0471294	0.221978	0.0421407	0.237127
1991	0.564368	0.466968	-0.0681239	0.189527		-0.0449744	0.222073	0.0459169	0.236508
1992	0.567506	0.466524	-0.0648424	0.189633		-0.0428604	0.222156	0.0496313	0.235892
1993	0.570563	0.466043	-0.0616031	0.18975		-0.0407904	0.222226	0.0532802	0.235282
1994	0.573536	0.465527	-0.0584109	0.189879		-0.0387675	0.222282	0.0568602	0.234677
1995	0.576422	0.464973	-0.0552704	0.190021		-0.0367946	0.222325	0.0603679	0.234079
1996	0.57922	0.464384	-0.0521863	0.190176		-0.0348746	0.222354	0.0637997	0.233489
1997	0.581926	0.463757	-0.0491631	0.190344		-0.0330105	0.222369	0.0671525	0.232908
1998	0.584539	0.463095	-0.0462053	0.190527		-0.0312051	0.222369	0.0704229	0.232339
[truncated: 24,503 more rows]
