# Supplementary material for: Neural circuit mechanisms for transforming learned olfactory valences into wind-oriented movement
Source: eLife. 2023 Sep 18;12:e85756. doi: 10.7554/eLife.85756 (PMC10588983; doi:10.7554/eLife.85756)
Supplement: Figure 5—figure supplement 2—source data 3. [file elife-85756-fig5-figsupp2-data3.xlsx]

## Sheet: Sheet1
	OCT			MCH
	Pre	Post		Pre	Post
AVG	1.97112	2.42892		2.55181	4.88582
SEM	0.502574	0.534403		0.639768	0.63823
Fly1	3.46312	4.28044		2.39847	5.20473
Fly2	1.32359	2.96558		0.788248	3.37862
Fly3	1.37706	1.49376		2.95648	4.95128
Fly4	2.8514	1.52145		4.67636	7.05015
Fly5	0.840426	1.88339		1.9395	3.8443
