# Supplementary material for: Neural circuit mechanisms for transforming learned olfactory valences into wind-oriented movement
Source: eLife. 2023 Sep 18;12:e85756. doi: 10.7554/eLife.85756 (PMC10588983; doi:10.7554/eLife.85756)
Supplement: Figure 5—source data 1. [file elife-85756-fig5-data1.xlsx]

## Sheet: Sheet1
	OCT			MCH
Time (x10^-4) (sec)	Pre	Post		Pre	Post
1	-56.8499	-56.8236		-58.569	-57.2542
2	-56.7743	-56.8433		-58.6248	-57.287
3	-56.7743	-56.9057		-58.5985	-57.3002
4	-56.7447	-56.8696		-58.6643	-57.3199
5	-56.702	-56.8564		-58.6347	-57.4218
6	-56.7118	-56.8203		-58.6314	-57.4547
7	-56.6395	-56.9057		-58.6544	-57.4448
8	-56.5738	-56.886		-58.6774	-57.4349
9	-56.6855	-56.8203		-58.638	-57.4284
10	-56.6231	-56.9419		-58.6051	-57.3889
11	-56.6165	-56.9255		-58.6478	-57.4021
12	-56.6822	-56.9353		-58.5328	-57.3462
13	-56.5212	-56.9353		-58.5032	-57.4054
14	-56.4817	-56.9353		-58.4868	-57.4941
15	-56.5672	-57.0109		-58.3684	-57.4678
16	-56.4554	-56.9649		-58.3586	-57.4021
17	-56.554	-56.9846		-58.421	-57.5204
18	-56.5968	-57.0142		-58.4966	-57.5105
19	-56.577	-56.9879		-58.4539	-57.4448
20	-56.5803	-57.0241		-58.4868	-57.4941
21	-56.5245	-57.0372		-58.4703	-57.55
22	-56.5968	-57.0537		-58.569	-57.573
23	-56.6001	-57.126		-58.615	-57.573
24	-56.6329	-57.1523		-58.5427	-57.55
25	-56.6132	-57.103		-58.5492	-57.5336
26	-56.6132	-57.057		-58.6051	-57.481
27	-56.6789	-57.103		-58.5492	-57.5566
28	-56.6789	-57.1194		-58.6051	-57.4678
29	-56.7217	-57.2443		-58.5887	-57.527
30	-56.5902	-57.2016		-58.6051	-57.5105
31	-56.6494	-57.2049		-58.6183	-57.4645
32	-56.5935	-57.2443		-58.5328	-57.4744
33	-56.6625	-57.2213		-58.4999	-57.504
34	-56.7315	-57.2377		-58.6018	-57.4678
35	-56.7381	-57.2377		-58.6018	-57.4317
36	-56.7447	-57.2805		-58.5492	-57.4744
37	-56.7776	-57.2936		-58.5394	-57.55
38	-56.7414	-57.3396		-58.6314	-57.5796
39	-56.8071	-57.3068		-58.6051	-57.573
40	-56.8236	-57.3692		-58.5196	-57.5829
41	-56.817	-57.3002		-58.5788	-57.5566
42	-56.8269	-57.2772		-58.5394	-57.6387
43	-56.8532	-57.2443		-58.4966	-57.6486
44	-56.8039	-57.1687		-58.4736	-57.5894
45	-56.8794	-57.2246		-58.4966	-57.527
46	-56.9419	-57.2542		-58.421	-57.504
47	-57.0142	-57.2837		-58.4243	-57.5237
48	-56.9813	-57.2279		-58.375	-57.55
49	-57.0537	-57.1753		-58.3882	-57.5138
50	-57.0405	-57.0668		-58.352	-57.5336
51	-57.0011	-57.1884		-58.4901	-57.504
52	-56.9945	-57.1325		-58.4638	-57.4777
53	-57.1161	-57.1293		-58.4013	-57.5303
54	-57.0668	-57.0997		-58.4408	-57.5631
55	-57.1095	-57.1128		-58.4112	-57.6256
56	-57.1128	-57.103		-58.3947	-57.6387
57	-57.1194	-57.2706		-58.3586	-57.6749
58	-57.0307	-57.1194		-58.2863	-57.6059
59	-57.0832	-57.1851		-58.3224	-57.6782
60	-57.0767	-57.1884		-58.2633	-57.6552
61	-57.0241	-57.1523		-58.306	-57.7209
62	-57.0471	-57.1753		-58.2501	-57.7242
63	-57.0504	-57.1095		-58.2534	-57.6749
64	-57.0537	-57.195		-58.2961	-57.596
65	-57.0438	-57.1621		-58.2501	-57.5861
66	-56.9485	-57.2016		-58.2403	-57.596
67	-57.0635	-57.195		-58.306	-57.665
68	-57.0076	-57.2805		-58.3027	-57.6585
69	-57.103	-57.2344		-58.3027	-57.6124
70	-57.1161	-57.2607		-58.3717	-57.6617
71	-57.0898	-57.2673		-58.3619	-57.5763
72	-57.08	-57.2114		-58.3914	-57.6223
73	-57.0931	-57.1753		-58.3356	-57.5664
74	-57.1786	-57.1523		-58.3356	-57.6354
75	-57.1753	-57.2805		-58.4276	-57.6617
76	-57.172	-57.1786		-58.3717	-57.6354
77	-57.1621	-57.0734		-58.3586	-57.5829
78	-57.2016	-57.0043		-58.4408	-57.6289
79	-57.2213	-56.9715		-58.4506	-57.5763
80	-57.1654	-57.0372		-58.4473	-57.5467
81	-57.1128	-56.9649		-58.5065	-57.4974
82	-57.1358	-57.0274		-58.5032	-57.4547
83	-57.2246	-56.9518		-58.4671	-57.4218
84	-57.1753	-57.0109		-58.5229	-57.4481
85	-57.1753	-56.9945		-58.4342	-57.4974
86	-57.2837	-57.0076		-58.4375	-57.4382
87	-57.2049	-56.9715		-58.4934	-57.3528
88	-57.2344	-56.9649		-58.4802	-57.4514
89	-57.3528	-56.9419		-58.4966	-57.4251
90	-57.264	-56.9189		-58.5394	-57.4448
91	-57.3561	-56.8729		-58.6413	-57.458
92	-57.3166	-56.9222		-58.6084	-57.458
93	-57.1818	-56.886		-58.6183	-57.5401
94	-57.1523	-57.0635		-58.6906	-57.3889
95	-57.2936	-56.9715		-58.6708	-57.4481
96	-57.2936	-56.9846		-58.7201	-57.4842
97	-57.264	-56.9978		-58.7004	-57.4612
98	-57.218	-56.9813		-58.7234	-57.4054
99	-57.3758	-57.0668		-58.6445	-57.4382
100	-57.3166	-57.057		-58.6314	-57.4678
101	-57.3166	-57.0405		-58.7004	-57.5237
102	-57.3363	-57.1457		-58.5887	-57.5237
103	-57.3528	-57.1523		-58.6708	-57.504
104	-57.4119	-57.172		-58.661	-57.5303
105	-57.3561	-57.0964		-58.6511	-57.5171
106	-57.3626	-57.0339		-58.661	-57.4777
107	-57.4021	-57.0734		-58.6281	-57.5631
108	-57.3824	-57.0339		-58.592	-57.5566
109	-57.4284	-57.0537		-58.5952	-57.5927
110	-57.4645	-57.0109		-58.6347	-57.5796
111	-57.4908	-57.0307		-58.5821	-57.4481
112	-57.4678	-56.9912		-58.684	-57.5303
113	-57.4284	-56.9945		-58.6873	-57.4908
114	-57.4711	-56.9419		-58.5854	-57.3988
115	-57.4349	-56.9748		-58.6084	-57.3791
116	-57.4284	-56.9025		-58.6281	-57.3462
117	-57.3331	-56.9025		-58.5952	-57.3528
118	-57.4415	-56.9912		-58.6807	-57.3495
119	-57.458	-57.0307		-58.7201	-57.3528
120	-57.4251	-56.9353		-58.6873	-57.3659
121	-57.4119	-56.9485		-58.6906	-57.3626
122	-57.3922	-57.0274		-58.7103	-57.4185
123	-57.3791	-56.9978		-58.7201	-57.3791
124	-57.3758	-57.0504		-58.6643	-57.3002
125	-57.3495	-57.057		-58.7004	-57.3824
126	-57.3002	-57.126		-58.7201	-57.3856
127	-57.3626	-57.0405		-58.6906	-57.3429
128	-57.3133	-57.0043		-58.638	-57.3725
129	-57.3659	-57.0241		-58.6906	-57.3298
130	-57.2312	-57.0865		-58.7004	-57.264
131	-57.3166	-57.0537		-58.7694	-57.3265
132	-57.264	-57.0865		-58.7694	-57.2772
133	-57.287	-57.0537		-58.7694	-57.218
134	-57.3068	-57.0701		-58.7267	-57.3035
135	-57.264	-57.1063		-58.7662	-57.2673
136	-57.2837	-57.0339		-58.8615	-57.3133
137	-57.3462	-56.9978		-58.8878	-57.3692
138	-57.2246	-57.1227		-58.8976	-57.3002
139	-57.2377	-56.9879		-58.9272	-57.2509
140	-57.1687	-56.9353		-58.9831	-57.1917
141	-57.1884	-56.9846		-59.0291	-57.2805
142	-57.2081	-56.9715		-58.9765	-57.2213
143	-57.241	-57.0043		-59.0094	-57.1753
144	-57.2706	-57.0142		-59.0751	-57.2476
145	-57.1687	-56.9879		-59.0357	-57.2213
146	-57.2147	-56.9846		-59.1179	-57.2509
147	-57.1523	-57.0307		-59.1047	-57.2673
148	-57.1851	-57.103		-59.0061	-57.241
149	-57.2443	-57.0471		-59.1343	-57.1457
150	-57.1687	-57.08		-59.0061	-57.3199
151	-57.1424	-57.0537		-59.085	-57.2213
152	-57.1358	-57.1753		-59.0521	-57.1227
153	-57.1358	-57.1095		-59.0225	-57.2049
154	-57.1424	-57.1128		-59.0916	-57.2312
155	-57.1161	-57.1358		-59.0653	-57.3363
156	-57.1325	-57.126		-59.1047	-57.2049
157	-57.172	-57.1227		-59.1376	-57.2213
158	-57.1983	-57.1917		-59.1507	-57.2542
159	-57.2344	-57.2049		-59.0554	-57.3166
160	-57.1818	-57.1523		-59.0686	-57.2903
161	-57.1391	-57.1457		-59.1442	-57.2936
162	-57.1884	-57.172		-59.2428	-57.3561
163	-57.0602	-57.1851		-59.2231	-57.3593
164	-57.0307	-57.1884		-59.2231	-57.4119
165	-57.1391	-57.2443		-59.2592	-57.3692
166	-57.1095	-57.2213		-59.2395	-57.3528
167	-57.1063	-57.2739		-59.2756	-57.3725
168	-57.0438	-57.2279		-59.3282	-57.3331
169	-56.9715	-57.1983		-59.2658	-57.3068
170	-56.9813	-57.2772		-59.2494	-57.3528
171	-57.0208	-57.2805		-59.2559	-57.2936
172	-56.9222	-57.2936		-59.3184	-57.3298
173	-56.932	-57.2476		-59.2592	-57.3692
174	-56.9189	-57.3396		-59.3808	-57.4021
175	-56.9846	-57.3298		-59.3085	-57.3396
176	-56.9419	-57.2443		-59.2362	-57.3265
177	-56.9616	-57.2936		-59.2461	-57.3429
178	-56.8663	-57.2739		-59.2691	-57.3232
179	-56.9123	-57.31		-59.3282	-57.3429
180	-56.8926	-57.3133		-59.3151	-57.3396
181	-56.9288	-57.2312		-59.2625	-57.3528
182	-57.0504	-57.287		-59.4104	-57.3298
183	-57.0043	-57.2476		-59.417	-57.3298
184	-57.0076	-57.3232		-59.3118	-57.2574
185	-56.9945	-57.3068		-59.2329	-57.3035
186	-56.9715	-57.264		-59.348	-57.3035
187	-56.9813	-57.3692		-59.3315	-57.3495
188	-56.9288	-57.3889		-59.3151	-57.3002
189	-56.9156	-57.5171		-59.3052	-57.287
190	-56.9518	-57.5171		-59.3019	-57.3528
191	-56.9189	-57.4711		-59.2362	-57.4152
192	-56.9715	-57.504		-59.2921	-57.3824
193	-56.9583	-57.527		-59.2198	-57.287
194	-57.0504	-57.5336		-59.2855	-57.3199
195	-57.0504	-57.5303		-59.2559	-57.2772
196	-57.0208	-57.5599		-59.2954	-57.2574
197	-57.057	-57.5894		-59.3578	-57.1654
198	-57.0241	-57.5566		-59.371	-57.2213
199	-57.0175	-57.5566		-59.3348	-57.1424
200	-57.0734	-57.5861		-59.4104	-57.1687
201	-57.0767	-57.5927		-59.3447	-57.1293
202	-57.0405	-57.642		-59.2658	-57.0898
203	-57.0635	-57.6289		-59.2329	-57.0931
204	-57.1917	-57.6552		-59.2329	-57.0208
205	-57.1687	-57.7143		-59.2461	-57.0668
206	-57.1227	-57.6157		-59.2296	-56.9781
207	-57.1753	-57.6519		-59.3019	-57.0865
208	-57.1095	-57.711		-59.2789	-57.0011
209	-57.1128	-57.7012		-59.2789	-56.9386
210	-57.1424	-57.7275		-59.2494	-56.9025
211	-57.2114	-57.7406		-59.2099	-56.8137
212	-57.126	-57.7636		-59.2296	-56.7677
213	-57.172	-57.7012		-59.1738	-56.817
214	-57.1621	-57.7636		-59.2033	-56.7776
215	-57.1227	-57.642		-59.131	-56.8466
216	-57.1391	-57.7045		-59.0225	-56.8334
217	-57.1556	-57.6387		-59.0686	-56.817
218	-57.126	-57.642		-59.0751	-56.7973
219	-57.1818	-57.7538		-59.0357	-56.817
220	-57.1983	-57.6585		-59.0686	-56.7907
221	-57.1983	-57.619		-58.9963	-56.8367
222	-57.2476	-57.6979		-59.0094	-56.9189
223	-57.149	-57.665		-58.9568	-56.8137
224	-57.2114	-57.6091		-58.9535	-56.7973
225	-57.2344	-57.6354		-58.9174	-56.8334
226	-57.2246	-57.6585		-58.9207	-56.748
227	-57.2213	-57.5763		-58.9897	-56.5968
228	-57.2739	-57.6289		-58.9601	-56.6494
229	-57.2246	-57.5336		-58.9667	-56.5902
230	-57.3265	-57.5861		-59.0258	-56.5277
231	-57.3462	-57.6486		-58.9371	-56.5935
232	-57.3166	-57.665		-58.993	-56.5803
233	-57.3363	-57.6519		-58.9634	-56.5277
234	-57.3856	-57.6486		-58.9634	-56.5179
235	-57.4415	-57.6683		-58.8944	-56.5606
236	-57.3725	-57.6256		-58.9634	-56.5475
237	-57.4349	-57.6289		-58.8911	-56.4752
238	-57.4908	-57.5171		-58.9897	-56.4258
239	-57.4744	-57.4185		-58.9404	-56.4686
240	-57.4349	-57.3988		-58.9765	-56.4028
241	-57.5796	-57.3889		-58.9535	-56.4554
242	-57.5533	-57.4415		-58.9141	-56.3963
243	-57.5401	-57.4711		-58.8779	-56.3371
244	-57.6453	-57.458		-58.8812	-56.3503
245	-57.6091	-57.4481		-58.9009	-56.393
246	-57.6716	-57.4317		-58.9009	-56.3996
247	-57.6848	-57.3856		-58.9009	-56.3831
248	-57.6256	-57.3659		-58.9371	-56.3437
249	-57.6519	-57.2443		-58.8483	-56.3535
250	-57.7209	-57.287		-58.8812	-56.3601
251	-57.6979	-57.3068		-58.8549	-56.2319
252	-57.7472	-57.3035		-58.7826	-56.2155
253	-57.7538	-57.2739		-58.9338	-56.2122
254	-57.7308	-57.2509		-58.8911	-56.153
255	-57.7012	-57.3002		-58.9239	-56.1267
256	-57.7834	-57.3363		-58.8582	-56.1662
257	-57.7341	-57.2377		-58.8188	-56.0873
258	-57.7538	-57.2509		-58.8648	-56.0741
259	-57.7538	-57.1983		-58.8648	-56.0741
260	-57.8327	-57.2081		-58.822	-56.084
261	-57.7998	-57.1588		-58.8352	-56.0709
262	-57.859	-57.1095		-58.8155	-56.1793
263	-57.7735	-57.0898		-58.8122	-56.1267
264	-57.8721	-57.0043		-58.822	-56.0972
265	-57.8622	-57.0635		-58.8451	-56.0577
266	-57.882	-57.0109		-58.7892	-56.1793
267	-57.8622	-56.9583		-58.7892	-56.1169
268	-57.951	-57.0142		-58.8253	-56.0084
269	-57.8622	-56.9846		-58.7136	-56.1366
270	-57.8853	-56.9288		-58.7859	-56.1234
271	-57.8655	-56.9255		-58.6183	-56.0972
272	-57.9116	-56.909		-58.7169	-56.0544
273	-57.9083	-56.8301		-58.73	-56.0709
274	-57.9148	-56.8269		-58.6676	-56.0413
275	-57.7867	-56.8301		-58.7201	-56.0479
276	-57.8655	-56.8203		-58.6774	-56.0906
277	-57.8425	-56.794		-58.6906	-56.084
278	-57.8491	-56.7841		-58.7004	-56.0183
279	-57.813	-56.7545		-58.6117	-55.9887
280	-57.8622	-56.771		-58.5164	-55.9657
281	-57.8294	-56.7217		-58.5361	-55.9624
282	-57.8425	-56.702		-58.4605	-55.8934
283	-57.8984	-56.7545		-58.375	-55.969
284	-57.8918	-56.7907		-58.3684	-55.9427
285	-57.7965	-56.8269		-58.2928	-55.9492
286	-57.8425	-56.7315		-58.2271	-55.9197
287	-57.8425	-56.7381		-58.1219	-55.8868
288	-57.8524	-56.7874		-58.1121	-55.8802
289	-57.8622	-56.7743		-58.0956	-55.8572
290	-57.7406	-56.7184		-58.0299	-55.8901
291	-57.6683	-56.6888		-57.9017	-55.8408
292	-57.5566	-56.7545		-57.8885	-55.8769
293	-57.688	-56.725		-57.8228	-55.8901
294	-57.6913	-56.794		-57.7899	-55.8441
295	-57.6913	-56.6527		-57.7932	-55.798
296	-57.6848	-56.7151		-57.7571	-55.7586
297	-57.6157	-56.7184		-57.7308	-55.7586
298	-57.6453	-56.6921		-57.7604	-55.7586
299	-57.573	-56.6921		-57.6519	-55.8539
300	-57.6387	-56.7644		-57.6815	-55.821
301	-57.596	-56.7513		-57.6354	-55.8079
302	-57.619	-56.863		-57.5631	-55.8375
303	-57.5894	-56.863		-57.6519	-55.8769
304	-57.5664	-56.7841		-57.6124	-55.9295
305	-57.4448	-56.8466		-57.5336	-55.923
306	-57.3692	-56.8334		-57.55	-55.9197
307	-57.3593	-56.84		-57.4711	-55.8736
308	-57.3626	-56.9222		-57.4382	-55.7948
309	-57.3528	-56.8992		-57.4777	-55.8473
310	-57.3659	-56.9452		-57.4777	-55.8638
311	-57.3396	-56.863		-57.4744	-55.9164
312	-57.3298	-56.863		-57.3725	-55.8901
313	-57.2969	-56.8006		-57.3528	-55.8572
314	-57.2772	-56.9222		-57.2805	-55.8605
315	-57.2837	-56.886		-57.3396	-55.8901
316	-57.3791	-56.9288		-57.3199	-55.8605
317	-57.3856	-57.0471		-57.2673	-55.8342
318	-57.2805	-56.9222		-57.1884	-55.946
319	-57.2706	-56.9945		-57.1227	-55.8605
320	-57.3002	-57.0471		-57.1884	-55.8769
321	-57.3068	-57.0701		-57.0504	-55.9098
322	-57.2542	-56.9781		-57.1293	-55.9328
323	-57.2772	-57.0372		-57.0964	-55.8999
324	-57.3166	-57.0405		-57.1588	-55.9394
325	-57.2837	-57.0011		-57.1063	-55.9328
326	-57.3035	-57.0142		-57.0635	-55.9295
327	-57.3889	-57.0997		-57.0076	-55.9197
328	-57.2574	-57.1095		-57.0274	-55.9887
329	-57.3528	-57.0898		-56.9978	-55.9788
330	-57.2969	-57.0504		-56.9715	-56.0347
331	-57.2279	-57.0898		-56.9353	-56.015
332	-57.1786	-57.057		-56.9386	-55.9821
333	-57.126	-57.0832		-56.9945	-56.0479
334	-57.1194	-57.0734		-56.9419	-56.107
335	-57.0898	-57.1325		-57.0504	-56.0511
336	-57.0734	-57.1358		-56.9419	-56.0248
337	-57.0011	-57.1095		-56.9551	-55.9525
338	-57.0339	-57.1194		-56.932	-56.0511
339	-57.1128	-57.0931		-56.9419	-56.1004
340	-57.0964	-57.1063		-56.9419	-56.084
341	-57.0339	-57.1095		-56.9518	-56.0643
342	-56.9616	-57.0471		-56.863	-56.0741
343	-56.9748	-57.0504		-56.8992	-56.1728
344	-56.9386	-56.9846		-56.7644	-56.2188
345	-56.9682	-57.08		-56.8104	-56.1892
346	-56.8959	-57.0865		-56.817	-56.1563
347	-56.9715	-57.1556		-56.8696	-56.2089
348	-56.9551	-57.0372		-56.7217	-56.1497
349	-56.9189	-57.103		-56.7907	-56.1629
350	-56.9288	-57.172		-56.7315	-56.0873
351	-56.9813	-57.1983		-56.7841	-56.1465
352	-57.0109	-57.2016		-56.8203	-56.1465
353	-56.8926	-57.1851		-56.8663	-56.1629
354	-56.9715	-57.2903		-56.8762	-56.1925
355	-56.9551	-57.3265		-56.8532	-56.176
356	-57.0011	-57.2739		-56.9222	-56.1465
357	-56.9156	-57.2837		-56.8532	-56.1103
358	-56.8827	-57.3002		-56.9551	-56.2319
359	-56.9222	-57.2772		-56.8466	-56.2122
360	-56.8532	-57.2673		-56.7973	-56.2253
361	-56.863	-57.3068		-56.8597	-56.2746
362	-56.84	-57.3528		-56.8794	-56.1497
363	-56.7973	-57.4317		-56.8039	-56.2023
364	-56.8236	-57.4514		-56.7743	-56.1366
365	-56.771	-57.3396		-56.7381	-56.1695
366	-56.8466	-57.2476		-56.6757	-56.1234
367	-56.8466	-57.2377		-56.6757	-56.1234
368	-56.817	-57.3035		-56.7184	-56.1234
369	-56.8137	-57.3199		-56.6954	-56.2221
370	-56.7644	-57.2772		-56.7151	-56.1399
371	-56.9123	-57.3133		-56.7513	-56.0511
372	-56.8367	-57.2969		-56.6625	-56.1629
373	-56.7677	-57.2739		-56.6329	-56.1234
374	-56.8334	-57.2344		-56.7315	-56.0906
375	-56.7973	-57.2936		-56.6395	-56.1629
376	-56.8269	-57.2772		-56.5672	-56.107
377	-56.909	-57.3298		-56.5738	-56.1563
378	-56.9057	-57.2706		-56.4752	-56.1728
379	-56.8433	-57.2706		-56.5179	-56.2615
380	-56.886	-57.2706		-56.4193	-56.2221
381	-56.9123	-57.3331		-56.4456	-56.2286
382	-56.9616	-57.3133		-56.4127	-56.2385
383	-56.9879	-57.3068		-56.3568	-56.153
384	-57.057	-57.287		-56.3437	-56.1892
385	-57.0767	-57.2903		-56.3404	-56.2056
386	-57.08	-57.3068		-56.2221	-56.0939
387	-57.1556	-57.3363		-56.1925	-56.1234
388	-57.1588	-57.3133		-56.199	-56.1826
389	-57.1588	-57.31		-56.1432	-56.199
390	-57.1424	-57.4185		-56.176	-56.2221
391	-57.1851	-57.3922		-56.1695	-56.2221
392	-57.1983	-57.4152		-56.1859	-56.153
393	-57.2805	-57.3561		-56.2385	-56.13
394	-57.2837	-57.3988		-56.2122	-56.153
395	-57.3265	-57.3889		-56.176	-56.1169
396	-57.2542	-57.3856		-56.2089	-56.2451
397	-57.287	-57.4547		-56.1432	-56.1892
398	-57.2542	-57.4152		-56.2089	-56.1465
399	-57.2574	-57.4119		-56.1859	-56.2878
400	-57.2574	-57.3462		-56.1859	-56.2056
401	-57.3692	-57.4087		-56.1465	-56.2352
402	-57.3955	-57.3166		-56.2089	-56.1958
403	-57.2969	-57.4448		-56.2023	-56.2122
404	-57.3988	-57.3593		-56.2023	-56.2549
405	-57.3232	-57.3232		-56.2319	-56.2582
406	-57.2969	-57.3133		-56.1103	-56.2056
407	-57.3396	-57.2706		-56.0807	-56.3634
408	-57.31	-57.3068		-56.0906	-56.3437
409	-57.3659	-57.1917		-56.0347	-56.3141
410	-57.4349	-57.1293		-56.0413	-56.176
411	-57.3922	-57.1391		-56.13	-56.1859
412	-57.3593	-57.0997		-56.0906	-56.1859
413	-57.3396	-57.1358		-56.1333	-56.2253
414	-57.3166	-57.0767		-56.1333	-56.2451
415	-57.3528	-57.0109		-56.084	-56.2286
416	-57.3396	-57.0865		-56.1366	-56.2352
417	-57.2772	-56.9649		-56.1892	-56.3404
418	-57.3856	-56.9353		-56.3404	-56.2746
419	-57.3363	-56.8597		-56.2122	-56.3667
420	-57.4185	-56.8597		-56.2385	-56.3338
421	-57.3692	-56.8499		-56.2451	-56.3338
422	-57.3758	-56.8433		-56.3141	-56.3963
423	-57.3988	-56.7414		-56.3371	-56.3535
424	-57.3692	-56.8039		-56.2188	-56.4061
425	-57.3561	-56.7085		-56.2549	-56.3338
426	-57.5007	-56.7217		-56.3996	-56.3765
427	-57.527	-56.6822		-56.3601	-56.3305
428	-57.4152	-56.7217		-56.4554	-56.3568
429	-57.4054	-56.7447		-56.37	-56.3108
430	-57.4547	-56.6527		-56.4094	-56.3207
431	-57.4908	-56.7085		-56.4686	-56.3338
432	-57.5467	-56.7414		-56.4784	-56.4028
433	-57.5138	-56.5212		-56.4883	-56.3733
434	-57.5105	-56.5935		-56.4357	-56.4587
435	-57.4415	-56.5935		-56.3601	-56.4357
436	-57.5303	-56.6559		-56.4226	-56.4324
437	-57.4908	-56.6231		-56.5179	-56.37
438	-57.4645	-56.5968		-56.439	-56.4258
439	-57.3758	-56.5442		-56.4752	-56.4587
440	-57.4317	-56.6001		-56.462	-56.3437
441	-57.3889	-56.531		-56.4193	-56.4423
442	-57.4349	-56.5836		-56.4357	-56.4291
443	-57.4415	-56.5803		-56.3371	-56.3996
444	-57.3528	-56.5409		-56.3305	-56.2615
445	-57.3133	-56.5146		-56.347	-56.2812
446	-57.3824	-56.4719		-56.4883	-56.3963
447	-57.3396	-56.4719		-56.5245	-56.3568
448	-57.4021	-56.4719		-56.5146	-56.3305
449	-57.3593	-56.462		-56.5573	-56.3108
450	-57.4185	-56.4324		-56.5475	-56.3075
451	-57.3824	-56.393		-56.6494	-56.3897
452	-57.4645	-56.462		-56.7315	-56.4653
453	-57.4054	-56.4456		-56.7677	-56.4324
454	-57.3133	-56.4653		-56.8367	-56.4587
455	-57.3593	-56.4357		-56.7776	-56.4094
456	-57.3133	-56.4719		-56.8006	-56.4817
457	-57.31	-56.462		-56.817	-56.4784
458	-57.2936	-56.5014		-56.8794	-56.4916
459	-57.241	-56.3338		-56.9123	-56.4456
460	-57.1818	-56.4226		-56.8564	-56.5146
461	-57.1523	-56.3634		-56.9583	-56.5738
462	-57.1128	-56.3634		-56.9583	-56.554
463	-57.1983	-56.3535		-57.0076	-56.6329
464	-57.2542	-56.347		-57.0865	-56.577
465	-57.2509	-56.4028		-57.1063	-56.5573
466	-57.3166	-56.4061		-57.1358	-56.5705
467	-57.3462	-56.3305		-57.1621	-56.6428
468	-57.3528	-56.3798		-57.1556	-56.6329
469	-57.3265	-56.2516		-57.195	-56.5705
470	-57.3791	-56.3733		-57.2607	-56.6198
471	-57.3002	-56.2582		-57.287	-56.5475
472	-57.3462	-56.393		-57.2969	-56.531
473	-57.3692	-56.3404		-57.3002	-56.5179
474	-57.3626	-56.3963		-57.287	-56.5277
475	-57.3528	-56.3765		-57.3363	-56.6099
476	-57.2805	-56.3897		-57.4382	-56.5869
477	-57.3561	-56.3765		-57.3298	-56.5869
478	-57.2739	-56.3601		-57.3824	-56.5869
479	-57.2016	-56.4587		-57.3331	-56.5409
480	-57.3133	-56.4554		-57.3462	-56.5869
481	-57.3298	-56.416		-57.287	-56.531
482	-57.264	-56.4554		-57.3626	-56.6132
483	-57.1983	-56.4719		-57.3429	-56.5935
484	-57.2016	-56.4686		-57.4284	-56.5803
485	-57.1786	-56.5639		-57.3593	-56.6757
486	-57.1523	-56.5442		-57.3265	-56.6001
487	-57.1095	-56.6001		-57.3988	-56.6132
488	-57.0964	-56.5803		-57.3396	-56.6757
489	-57.0241	-56.6231		-57.3298	-56.5836
490	-57.0372	-56.6757		-57.3922	-56.5639
491	-57.1457	-56.6592		-57.4119	-56.5968
492	-57.0537	-56.7184		-57.3265	-56.7052
493	-57.1753	-56.6888		-57.3166	-56.6198
494	-57.1095	-56.7578		-57.3331	-56.6559
495	-57.0504	-56.7776		-57.3659	-56.6001
496	-56.9649	-56.7381		-57.3692	-56.6757
497	-57.0109	-56.7907		-57.3922	-56.6231
498	-56.9748	-56.7808		-57.458	-56.6527
499	-56.9255	-56.7874		-57.4842	-56.6494
500	-56.9419	-56.7776		-57.5697	-56.6165
501	-56.8499	-56.7808		-57.6354	-56.6625
502	-56.8334	-56.8039		-57.5993	-56.6527
503	-56.8301	-56.7513		-57.5861	-56.725
504	-56.8236	-56.7381		-57.7176	-56.7184
505	-56.7052	-56.8104		-57.7867	-56.6625
506	-56.6198	-56.7907		-57.8195	-56.7513
507	-56.5705	-56.8269		-57.7571	-56.7085
508	-56.5672	-56.7447		-57.7472	-56.7776
509	-56.6001	-56.8301		-57.8491	-56.7874
510	-56.4982	-56.863		-57.8195	-56.7118
511	-56.5442	-56.8236		-57.8195	-56.7907
512	-56.531	-56.8137		-57.7801	-56.6757
513	-56.5409	-56.8269		-57.7439	-56.6066
514	-56.4719	-56.8071		-57.7604	-56.7381
515	-56.4423	-56.8269		-57.8031	-56.7513
516	-56.3108	-56.8334		-57.7406	-56.6855
517	-56.3108	-56.8597		-57.6815	-56.7118
518	-56.2812	-56.8663		-57.7045	-56.7184
519	-56.3996	-56.8269		-57.7538	-56.6461
520	-56.2812	-56.9123		-57.7242	-56.6724
521	-56.2221	-56.932		-57.6683	-56.6428
522	-56.2155	-56.9879		-57.7439	-56.5705
523	-56.2352	-57.0011		-57.7604	-56.6001
524	-56.2516	-56.9748		-57.7932	-56.6329
525	-56.1695	-57.0537		-57.7636	-56.6231
526	-56.2615	-57.0109		-57.7341	-56.6461
527	-56.2319	-57.0668		-57.688	-56.5902
528	-56.2221	-57.1194		-57.7669	-56.5672
529	-56.1728	-57.0997		-57.7341	-56.4916
530	-56.1826	-57.1227		-57.7571	-56.4752
531	-56.2451	-57.1161		-57.6519	-56.5442
532	-56.2385	-57.1391		-57.6979	-56.6296
533	-56.1859	-57.0142		-57.7373	-56.6231
534	-56.13	-57.0339		-57.688	-56.5803
535	-56.2023	-57.1556		-57.6091	-56.5442
536	-56.2549	-57.0504		-57.5927	-56.508
537	-56.2352	-57.0635		-57.6617	-56.462
538	-56.2451	-57.0668		-57.6552	-56.5047
539	-56.2286	-57.1161		-57.6026	-56.4521
540	-56.2911	-57.1523		-57.6585	-56.4061
541	-56.2779	-57.1523		-57.5566	-56.4587
542	-56.2319	-57.1161		-57.5237	-56.4094
543	-56.3568	-57.1325		-57.5073	-56.4916
544	-56.2977	-57.1917		-57.5204	-56.5573
545	-56.4226	-57.1786		-57.5073	-56.5836
546	-56.347	-57.1095		-57.573	-56.5475
547	-56.324	-57.1621		-57.4744	-56.5245
548	-56.3667	-57.0635		-57.5336	-56.439
549	-56.2812	-57.0011		-57.5368	-56.4587
550	-56.3568	-57.0011		-57.5401	-56.393
551	-56.3535	-57.1095		-57.481	-56.3371
552	-56.439	-57.0076		-57.5533	-56.3897
553	-56.3831	-57.0241		-57.527	-56.3963
554	-56.4094	-57.0471		-57.4678	-56.3009
555	-56.4489	-56.9748		-57.4185	-56.3141
556	-56.485	-57.0372		-57.4514	-56.3141
557	-56.4719	-56.9682		-57.3626	-56.1925
558	-56.4817	-57.0109		-57.3331	-56.1169
559	-56.554	-56.9945		-57.2706	-56.1267
560	-56.5672	-56.9255		-57.2673	-56.0577
561	-56.6494	-56.9781		-57.3856	-56.13
562	-56.6461	-56.9057		-57.3429	-56.0774
563	-56.6001	-56.9189		-57.2903	-56.0741
564	-56.5902	-56.886		-57.2673	-56.0544
565	-56.5968	-56.8597		-57.2739	-56.0084
566	-56.5935	-56.8597		-57.2837	-55.9985
567	-56.6527	-56.8433		-57.3659	-55.9953
568	-56.6625	-56.8137		-57.3396	-56.0709
569	-56.6001	-56.7545		-57.3528	-55.9821
570	-56.6855	-56.8433		-57.4317	-56.0248
571	-56.6296	-56.7677		-57.3922	-55.9558
572	-56.6757	-56.725		-57.3659	-55.9558
573	-56.6625	-56.7118		-57.4218	-55.8309
574	-56.6855	-56.7118		-57.3561	-55.7849
575	-56.748	-56.7644		-57.4087	-55.8506
576	-56.6625	-56.8071		-57.3692	-55.8572
577	-56.6987	-56.7513		-57.3791	-55.923
578	-56.7052	-56.7644		-57.3561	-55.7323
579	-56.6921	-56.6954		-57.3495	-55.8079
580	-56.7118	-56.7414		-57.3495	-55.7553
581	-56.725	-56.7184		-57.4185	-55.7685
582	-56.6822	-56.7578		-57.3528	-55.7586
583	-56.725	-56.6362		-57.4448	-55.7783
584	-56.7217	-56.7052		-57.2805	-55.7126
585	-56.7841	-56.6559		-57.2805	-55.7093
586	-56.7381	-56.7118		-57.2542	-55.6764
587	-56.8203	-56.6264		-57.2607	-55.7586
588	-56.8532	-56.6001		-57.2805	-55.7257
589	-56.8269	-56.6099		-57.3035	-55.7027
590	-56.8564	-56.702		-57.2147	-55.7323
591	-56.9452	-56.6559		-57.31	-55.775
592	-56.8564	-56.6329		-57.2344	-55.683
593	-56.8532	-56.6921		-57.2213	-55.7159
594	-56.8696	-56.6362		-57.2312	-55.706
595	-56.9156	-56.6461		-57.2081	-55.7717
596	-56.8762	-56.6132		-57.2607	-55.5745
597	-56.9156	-56.6954		-57.1818	-55.5482
598	-56.8893	-56.6757		-57.2739	-55.6567
599	-56.8203	-56.6625		-57.2377	-55.6107
600	-56.9649	-56.6165		-57.2279	-55.6271
601	-56.9781	-56.6198		-57.2739	-55.5548
602	-56.886	-56.5902		-57.2016	-55.591
603	-56.9945	-56.577		-57.149	-55.614
604	-56.9748	-56.5113		-57.218	-55.5384
605	-56.9255	-56.5606		-57.2246	-55.5187
606	-56.9649	-56.5113		-57.3692	-55.5877
607	-56.9551	-56.5573		-57.3232	-55.6501
608	-56.9189	-56.5376		-57.2969	-55.5088
609	-56.8893	-56.4489		-57.3068	-55.5844
610	-56.8532	-56.5146		-57.4119	-55.5975
611	-56.8269	-56.5179		-57.3593	-55.6205
612	-56.8137	-56.4916		-57.3495	-55.6863
613	-56.8367	-56.4817		-57.3955	-55.6238
614	-56.7545	-56.4291		-57.3955	-55.6173
615	-56.6757	-56.4521		-57.4415	-55.637
616	-56.7348	-56.4456		-57.4382	-55.5778
617	-56.6987	-56.4784		-57.4842	-55.637
618	-56.7348	-56.4554		-57.4875	-55.6304
619	-56.7973	-56.4784		-57.527	-55.7027
620	-56.7808	-56.5047		-57.4349	-55.6501
621	-56.7447	-56.4357		-57.5303	-55.637
622	-56.7545	-56.3996		-57.6157	-55.66
623	-56.6362	-56.4291		-57.5171	-55.6633
624	-56.6625	-56.3338		-57.5927	-55.706
625	-56.6855	-56.393		-57.4875	-55.7454
626	-56.6559	-56.3437		-57.5664	-55.7685
627	-56.6691	-56.3963		-57.5303	-55.7619
628	-56.6724	-56.3371		-57.504	-55.7454
629	-56.6724	-56.3174		-57.6026	-55.729
630	-56.5409	-56.3864		-57.5861	-55.821
631	-56.5968	-56.3831		-57.6486	-55.7619
632	-56.6231	-56.3798		-57.5368	-55.706
633	-56.6329	-56.3996		-57.5401	-55.7093
634	-56.5212	-56.4752		-57.481	-55.7323
635	-56.554	-56.4521		-57.5697	-55.7487
636	-56.485	-56.3437		-57.5204	-55.798
637	-56.508	-56.3437		-57.5566	-55.7192
638	-56.4817	-56.2746		-57.4908	-55.7257
639	-56.4784	-56.4456		-57.6223	-55.6534
640	-56.4817	-56.3437		-57.5533	-55.6567
641	-56.5212	-56.3733		-57.6059	-55.637
642	-56.4686	-56.4686		-57.5237	-55.6567
643	-56.4226	-56.5113		-57.5204	-55.7454
644	-56.4817	-56.6132		-57.6289	-55.752
645	-56.4127	-56.6066		-57.55	-55.7422
646	-56.3864	-56.6231		-57.596	-55.6994
647	-56.347	-56.6559		-57.596	-55.6896
648	-56.37	-56.5606		-57.6256	-55.7093
649	-56.3305	-56.5573		-57.6223	-55.7159
650	-56.2582	-56.577		-57.5829	-55.8539
651	-56.2944	-56.5245		-57.5763	-55.7685
652	-56.2286	-56.4784		-57.5861	-55.7783
653	-56.2122	-56.6296		-57.5533	-55.7915
654	-56.2155	-56.6165		-57.5664	-55.8243
655	-56.1892	-56.6296		-57.596	-55.7915
656	-56.2122	-56.6789		-57.6617	-55.8079
657	-56.2352	-56.6296		-57.573	-55.8276
658	-56.2582	-56.6395		-57.6946	-55.7619
659	-56.1234	-56.6757		-57.7012	-55.8441
660	-56.1267	-56.7118		-57.6486	-55.9164
661	-56.1136	-56.7447		-57.7045	-55.9197
662	-56.0939	-56.6461		-57.6913	-55.9394
663	-56.038	-56.7282		-57.7176	-55.9361
664	-56.0643	-56.7381		-57.6848	-56.0018
665	-56.0741	-56.8269		-57.6815	-56.0018
666	-56.0314	-56.7381		-57.5566	-56.0511
667	-55.9854	-56.6527		-57.688	-55.9953
668	-56.0248	-56.5968		-57.7308	-55.9558
669	-55.9295	-56.5639		-57.6617	-56.0248
670	-55.9525	-56.5803		-57.7439	-56.0347
671	-55.9394	-56.5869		-57.7012	-56.0347
672	-55.9164	-56.6691		-57.7571	-56.0446
673	-55.9427	-56.6658		-57.7636	-56.0446
674	-55.9427	-56.5902		-57.6815	-56.0511
675	-55.9624	-56.6527		-57.6585	-56.1234
676	-55.8999	-56.6329		-57.7012	-56.1399
677	-55.8638	-56.5869		-57.6354	-56.1333
678	-55.9262	-56.6165		-57.5171	-56.1103
679	-55.9131	-56.6001		-57.5204	-56.2319
680	-55.9887	-56.6264		-57.55	-56.1662
681	-55.8276	-56.5902		-57.5566	-56.1925
682	-55.8934	-56.5803		-57.5599	-56.1103
683	-55.8704	-56.508		-57.5434	-56.1234
684	-55.8802	-56.4653		-57.619	-56.1103
685	-55.8835	-56.416		-57.5467	-56.2188
686	-55.8769	-56.4982		-57.4284	-56.1333
687	-55.9032	-56.4784		-57.5401	-56.2089
688	-55.9427	-56.4226		-57.4678	-56.2155
689	-55.8934	-56.4982		-57.4842	-56.2089
690	-55.8802	-56.4719		-57.5171	-56.1859
691	-55.8638	-56.5212		-57.4054	-56.1234
692	-55.8539	-56.5508		-57.3298	-56.1662
693	-55.8769	-56.5376		-57.3298	-56.1399
694	-55.8704	-56.5014		-57.3199	-56.1629
695	-55.8473	-56.485		-57.3692	-56.2253
696	-55.9821	-56.6132		-57.3692	-56.2089
697	-55.9197	-56.6264		-57.4152	-56.1695
698	-55.8506	-56.7151		-57.3856	-56.1695
699	-55.8868	-56.6757		-57.4054	-56.1202
700	-55.969	-56.6198		-57.4645	-56.1267
701	-56.0018	-56.6494		-57.5073	-56.1629
702	-55.8408	-56.5869		-57.4908	-56.1925
703	-55.9985	-56.6461		-57.3824	-56.2155
704	-55.9953	-56.6494		-57.4612	-56.107
705	-55.9722	-56.6001		-57.4284	-56.1629
706	-55.9525	-56.6001		-57.31	-56.1826
707	-55.946	-56.6329		-57.3626	-56.1629
708	-55.9262	-56.6033		-57.3495	-56.2155
709	-55.9854	-56.5968		-57.3199	-56.3108
710	-55.9985	-56.531		-57.3429	-56.0939
711	-55.9985	-56.6559		-57.1884	-56.176
712	-55.9394	-56.6658		-57.2509	-56.2451
713	-55.9295	-56.7414		-57.2903	-56.2319
714	-55.9065	-56.6658		-57.2805	-56.2779
715	-55.9788	-56.6559		-57.1786	-56.2615
716	-55.9755	-56.6559		-57.126	-56.2681
717	-56.0248	-56.6231		-57.0372	-56.2779
718	-56.0873	-56.5803		-57.0668	-56.1432
719	-56.0511	-56.5836		-57.0405	-56.2188
720	-56.0873	-56.5508		-57.0734	-56.1826
721	-56.1793	-56.4982		-57.0076	-56.1202
722	-56.1169	-56.4949		-57.08	-56.2056
723	-56.0873	-56.4291		-57.0635	-56.0676
724	-56.0873	-56.5343		-57.0931	-56.1202
725	-56.1366	-56.4982		-56.9518	-56.1103
726	-56.153	-56.5277		-56.909	-56.0709
727	-56.2089	-56.4784		-56.9616	-56.0479
728	-56.2286	-56.5212		-56.909	-56.0709
729	-56.2352	-56.4784		-56.8729	-55.9854
730	-56.1169	-56.4817		-56.8893	-55.992
731	-56.1728	-56.3864		-56.9123	-56.061
732	-56.1169	-56.4028		-56.8597	-55.9985
733	-56.061	-56.439		-56.7776	-56.015
734	-56.1793	-56.4719		-56.7348	-55.969
735	-56.1925	-56.3634		-56.7085	-56.0577
736	-56.2089	-56.4094		-56.7217	-56.0018
737	-56.3075	-56.3831		-56.7841	-55.9164
738	-56.3305	-56.4489		-56.725	-55.8769
739	-56.2582	-56.4456		-56.6888	-55.9361
740	-56.2418	-56.4028		-56.6428	-56.0281
741	-56.3272	-56.4094		-56.5179	-55.9788
742	-56.324	-56.3305		-56.5245	-56.0939
743	-56.3601	-56.4456		-56.4456	-55.9755
744	-56.4127	-56.4291		-56.4916	-55.9854
745	-56.508	-56.3864		-56.4916	-56.0446
746	-56.5376	-56.4193		-56.4554	-56.0248
747	-56.5245	-56.3601		-56.4258	-56.0873
748	-56.4982	-56.3897		-56.4357	-56.015
749	-56.5639	-56.393		-56.4752	-56.1629
750	-56.5343	-56.4094		-56.5047	-56.1563
751	-56.4784	-56.3568		-56.577	-56.1103
752	-56.4686	-56.3075		-56.5639	-56.2418
753	-56.6428	-56.3371		-56.4949	-56.2648
754	-56.554	-56.3601		-56.4686	-56.2746
755	-56.6428	-56.4226		-56.4587	-56.2385
756	-56.6362	-56.3601		-56.5179	-56.2451
757	-56.6592	-56.2385		-56.5738	-56.2812
758	-56.6789	-56.3305		-56.6066	-56.3272
759	-56.7315	-56.3272		-56.5836	-56.1925
760	-56.7118	-56.3174		-56.577	-56.2714
761	-56.6888	-56.3798		-56.6033	-56.3437
762	-56.7743	-56.2878		-56.6165	-56.3798
763	-56.7282	-56.2648		-56.6264	-56.2714
764	-56.8334	-56.3108		-56.6264	-56.2286
765	-56.7973	-56.2944		-56.7348	-56.2418
766	-56.817	-56.324		-56.577	-56.2549
767	-56.8137	-56.324		-56.5606	-56.2122
768	-56.7513	-56.3503		-56.485	-56.153
769	-56.8236	-56.3174		-56.5245	-56.1826
770	-56.6855	-56.2911		-56.439	-56.0972
771	-56.6033	-56.2253		-56.4521	-56.176
772	-56.577	-56.2878		-56.5113	-56.1399
773	-56.6231	-56.2944		-56.4883	-56.1103
774	-56.6461	-56.2582		-56.5212	-56.1728
775	-56.6329	-56.2944		-56.508	-56.1925
776	-56.6033	-56.2648		-56.5409	-56.1662
777	-56.6231	-56.1662		-56.6033	-56.176
778	-56.5475	-56.2352		-56.5409	-56.1465
779	-56.6099	-56.2122		-56.5869	-56.1103
780	-56.6395	-56.2089		-56.6954	-56.1629
781	-56.6264	-56.2056		-56.6461	-56.2155
782	-56.6296	-56.2188		-56.7184	-56.1267
783	-56.6954	-56.1826		-56.7151	-56.153
784	-56.5935	-56.1563		-56.6822	-56.1596
785	-56.5705	-56.2188		-56.7447	-56.107
786	-56.6165	-56.2155		-56.7743	-56.1892
787	-56.5705	-56.2089		-56.7513	-56.1202
788	-56.6954	-56.2352		-56.771	-56.1925
789	-56.6527	-56.2221		-56.7513	-56.2385
790	-56.7348	-56.2418		-56.8137	-56.2056
791	-56.6461	-56.1826		-56.817	-56.1169
792	-56.725	-56.1497		-56.8893	-56.1662
793	-56.6329	-56.2155		-56.886	-56.1202
794	-56.6592	-56.2385		-56.8663	-56.1892
795	-56.7743	-56.2911		-56.8992	-56.2319
796	-56.6559	-56.2746		-56.9353	-56.1892
797	-56.6954	-56.2385		-56.9222	-56.2944
798	-56.7578	-56.2056		-56.9781	-56.3075
799	-56.725	-56.1826		-57.0241	-56.3075
800	-56.7348	-56.1892		-57.0438	-56.2746
801	-56.8367	-56.1728		-57.0339	-56.3733
802	-56.7776	-56.2352		-57.0767	-56.2812
803	-56.8499	-56.1497		-57.149	-56.3897
804	-56.7808	-56.2122		-57.2081	-56.3996
805	-56.8729	-56.2385		-57.1325	-56.3305
806	-56.7414	-56.2549		-57.1128	-56.3075
807	-56.7513	-56.2878		-57.241	-56.4127
808	-56.8499	-56.2812		-57.3068	-56.3535
809	-56.794	-56.2878		-57.2903	-56.4094
810	-56.7841	-56.4127		-57.3298	-56.3667
811	-56.7085	-56.4719		-57.3199	-56.4456
812	-56.748	-56.439		-57.2739	-56.3535
813	-56.748	-56.4291		-57.31	-56.3963
814	-56.7217	-56.508		-57.3265	-56.4686
815	-56.6757	-56.462		-57.2837	-56.577
816	-56.6428	-56.4423		-57.3955	-56.5968
817	-56.7184	-56.4127		-57.3988	-56.5869
818	-56.6264	-56.4456		-57.3528	-56.6132
819	-56.6329	-56.4127		-57.3396	-56.6066
820	-56.6855	-56.5343		-57.3298	-56.5409
821	-56.7414	-56.5869		-57.3265	-56.5738
822	-56.7315	-56.5508		-57.3528	-56.5146
823	-56.6658	-56.6527		-57.4021	-56.6231
824	-56.725	-56.6527		-57.4119	-56.5573
825	-56.7414	-56.6296		-57.4119	-56.4916
826	-56.6592	-56.6592		-57.4415	-56.5705
827	-56.6691	-56.6592		-57.481	-56.5836
828	-56.771	-56.6296		-57.4514	-56.6033
829	-56.794	-56.6789		-57.5138	-56.6132
830	-56.7545	-56.725		-57.5007	-56.6428
831	-56.8433	-56.794		-57.4777	-56.6461
832	-56.7611	-56.7348		-57.5829	-56.6954
833	-56.8104	-56.702		-57.5599	-56.6296
834	-56.794	-56.6658		-57.573	-56.6428
835	-56.7545	-56.6822		-57.5763	-56.5935
836	-56.7973	-56.7282		-57.5927	-56.6198
837	-56.7776	-56.6822		-57.6486	-56.6296
838	-56.7085	-56.6888		-57.7275	-56.702
839	-56.794	-56.7513		-57.6289	-56.6231
840	-56.8203	-56.6494		-57.5927	-56.8564
841	-56.8104	-56.7052		-57.6453	-56.7907
842	-56.8794	-56.7118		-57.6091	-56.8334
843	-56.8301	-56.7743		-57.6387	-56.7578
844	-56.8301	-56.6527		-57.7242	-56.7743
845	-56.84	-56.7447		-57.7078	-56.7282
846	-56.817	-56.7545		-57.8064	-56.6691
847	-56.8992	-56.6954		-57.7735	-56.7907
848	-56.8203	-56.7282		-57.7998	-56.7808
849	-56.9649	-56.7611		-57.6946	-56.7677
850	-57.0175	-56.7513		-57.642	-56.8006
851	-56.9616	-56.7611		-57.6026	-56.8104
852	-57.0602	-56.8269		-57.5434	-56.7841
853	-57.0635	-56.8071		-57.5434	-56.8334
854	-57.0767	-56.6658		-57.596	-56.794
855	-57.0701	-56.7184		-57.5796	-56.8269
856	-57.0635	-56.8269		-57.6749	-56.9419
857	-57.0832	-56.8367		-57.6749	-56.9715
858	-57.0208	-56.8663		-57.7242	-56.9781
859	-57.0109	-56.9419		-57.665	-57.0307
860	-57.0307	-56.9419		-57.7045	-56.9945
861	-57.0898	-56.9057		-57.6749	-57.0701
862	-57.0142	-56.9452		-57.6848	-57.0339
863	-57.0635	-56.9156		-57.7143	-57.1194
864	-57.0274	-56.9288		-57.7538	-57.1687
865	-56.9715	-56.9189		-57.6946	-57.1128
866	-57.1194	-56.9518		-57.7275	-57.0898
867	-57.0832	-56.8959		-57.8031	-57.1358
868	-57.1424	-56.9879		-57.7669	-57.126
869	-57.2344	-56.9649		-57.8392	-57.1523
870	-57.126	-56.9057		-57.882	-57.1293
871	-57.1588	-57.0011		-57.813	-57.1128
872	-57.1391	-56.9978		-57.8097	-57.0832
873	-57.1556	-56.9057		-57.8097	-57.0964
874	-57.1424	-56.9123		-57.8392	-57.0767
875	-57.2081	-56.8893		-57.9379	-57.0241
876	-57.2706	-56.9057		-57.9313	-56.9978
877	-57.2246	-56.9616		-57.8162	-57.0602
878	-57.2739	-56.8532		-57.8491	-57.0043
879	-57.2903	-56.9485		-57.8557	-56.9879
880	-57.2542	-56.9025		-57.8162	-57.0668
881	-57.31	-56.8762		-57.9083	-57.0898
882	-57.2936	-56.909		-57.8655	-57.1128
883	-57.2476	-56.9649		-57.8853	-57.103
884	-57.1818	-56.9057		-57.8392	-56.9715
885	-57.1884	-56.8729		-57.8885	-57.0241
886	-57.2476	-56.9057		-57.9839	-56.9551
887	-57.3495	-56.8663		-57.836	-57.0438
888	-57.2936	-56.8564		-57.9346	-56.9879
889	-57.2903	-56.7414		-58.0102	-57.0438
890	-57.3035	-56.7743		-58.0529	-56.9781
891	-57.3889	-56.817		-58.1055	-56.9288
892	-57.3363	-56.7677		-58.043	-56.9353
893	-57.3068	-56.7447		-58.1022	-56.9583
894	-57.2969	-56.7611		-58.0397	-56.8269
895	-57.3232	-56.7776		-58.0693	-56.8532
896	-57.2969	-56.7151		-58.02	-56.9057
897	-57.3955	-56.6691		-58.0989	-56.8827
898	-57.3988	-56.7217		-58.1679	-56.8532
899	-57.4185	-56.8006		-58.0397	-56.771
900	-57.5007	-56.7118		-58.1679	-56.7743
901	-57.5105	-56.7052		-58.1877	-56.6888
902	-57.5303	-56.6559		-58.1647	-56.5836
903	-57.4415	-56.6494		-58.1877	-56.6264
904	-57.4547	-56.6789		-58.214	-56.5803
905	-57.5204	-56.6165		-58.2567	-56.577
906	-57.5007	-56.6198		-58.2205	-56.6033
907	-57.5796	-56.5245		-58.3126	-56.5475
908	-57.5631	-56.5606		-58.2731	-56.5047
909	-57.573	-56.5047		-58.3158	-56.5014
910	-57.6486	-56.5672		-58.3652	-56.462
911	-57.619	-56.5738		-58.3684	-56.416
912	-57.6453	-56.5836		-58.4638	-56.4061
913	-57.642	-56.5277		-58.4473	-56.3535
914	-57.6683	-56.5442		-58.4473	-56.2714
915	-57.5697	-56.5376		-58.4802	-56.2779
916	-57.5829	-56.5573		-58.4736	-56.4193
917	-57.711	-56.508		-58.4506	-56.2911
918	-57.711	-56.4653		-58.4901	-56.3009
919	-57.642	-56.4193		-58.569	-56.3009
920	-57.6322	-56.4357		-58.5164	-56.2878
921	-57.7439	-56.4916		-58.5755	-56.2714
922	-57.7932	-56.4817		-58.4802	-56.2253
923	-57.8097	-56.5146		-58.5854	-56.1958
924	-57.813	-56.6001		-58.6215	-56.1596
925	-57.7505	-56.5113		-58.5196	-56.2549
926	-57.7406	-56.4719		-58.5295	-56.13
927	-57.7998	-56.531		-58.615	-56.1465
928	-57.8195	-56.4258		-58.5952	-56.1169
929	-57.8491	-56.5245		-58.7004	-56.1859
930	-57.813	-56.554		-58.7563	-56.1202
931	-57.9116	-56.5343		-58.7103	-56.1366
932	-57.9116	-56.508		-58.6939	-56.0741
933	-57.9641	-56.5606		-58.753	-56.0643
934	-57.836	-56.5212		-58.8023	-56.1267
935	-57.9214	-56.508		-58.9338	-56.0906
936	-57.8327	-56.577		-58.8483	-56.153
937	-57.9148	-56.5639		-58.9207	-56.1169
938	-57.8458	-56.5606		-58.9667	-56.1399
939	-57.8557	-56.485		-59.0423	-56.0939
940	-57.9411	-56.4752		-58.9174	-56.0939
941	-57.8787	-56.4784		-58.8746	-56.1432
942	-57.8754	-56.4423		-58.9667	-56.0939
943	-57.8228	-56.4653		-58.9141	-56.13
944	-57.8655	-56.4686		-58.8911	-56.0413
945	-57.9707	-56.4554		-58.9831	-56.0281
946	-57.9313	-56.393		-59.0193	-55.9525
947	-57.8787	-56.4226		-59.0883	-55.9985
948	-57.9181	-56.4587		-58.9798	-55.9657
949	-57.928	-56.5212		-58.9963	-56.0643
950	-57.9148	-56.4817		-58.9667	-56.061
951	-57.9116	-56.5179		-58.993	-56.0709
952	-57.9116	-56.3535		-59.0291	-56.1202
953	-57.8721	-56.3404		-59.1047	-56.2122
954	-57.8392	-56.3404		-59.0686	-56.1826
955	-57.7932	-56.347		-59.0949	-56.1563
956	-57.7669	-56.3042		-59.1705	-56.1004
957	-57.7439	-56.2648		-59.1376	-56.084
958	-57.7176	-56.3009		-59.1179	-56.2319
959	-57.7439	-56.2812		-59.154	-56.2812
960	-57.7341	-56.2878		-59.2329	-56.3042
961	-57.6815	-56.3174		-59.2362	-56.2549
962	-57.6289	-56.347		-59.2888	-56.2779
963	-57.6617	-56.3338		-59.2461	-56.3075
964	-57.6486	-56.3437		-59.2855	-56.2648
965	-57.6322	-56.3404		-59.2789	-56.3831
966	-57.573	-56.3535		-59.3315	-56.4094
967	-57.619	-56.416		-59.2954	-56.4423
968	-57.5927	-56.3831		-59.3447	-56.508
969	-57.5631	-56.3371		-59.3184	-56.6296
970	-57.458	-56.4226		-59.3052	-56.5442
971	-57.4448	-56.4226		-59.3019	-56.554
972	-57.4448	-56.5113		-59.348	-56.5902
973	-57.4317	-56.4456		-59.2822	-56.5343
974	-57.4021	-56.3897		-59.2855	-56.5376
975	-57.4317	-56.37		-59.3611	-56.5179
976	-57.4185	-56.4226		-59.4499	-56.4982
977	-57.3791	-56.3963		-59.394	-56.5508
978	-57.3955	-56.3568		-59.417	-56.531
979	-57.287	-56.393		-59.3644	-56.5935
980	-57.2114	-56.4258		-59.417	-56.5606
981	-57.2542	-56.3831		-59.371	-56.6231
982	-57.2049	-56.4883		-59.3512	-56.6362
983	-57.218	-56.4752		-59.3052	-56.6527
984	-57.1983	-56.4949		-59.3414	-56.7052
985	-57.1523	-56.3831		-59.3085	-56.6132
986	-57.1884	-56.37		-59.2921	-56.5245
987	-57.0964	-56.3338		-59.1639	-56.6066
988	-57.1391	-56.4719		-59.1902	-56.6592
989	-57.0734	-56.4061		-59.2165	-56.7085
990	-57.0109	-56.4061		-59.1639	-56.7513
991	-56.886	-56.5803		-59.1409	-56.6789
992	-56.9419	-56.4686		-59.1474	-56.8137
993	-56.9386	-56.4719		-59.1507	-56.6888
994	-56.8367	-56.4653		-59.1047	-56.8071
995	-56.8532	-56.4784		-59.0258	-56.8532
996	-56.725	-56.5146		-59.0686	-56.7907
997	-56.8367	-56.485		-59.1343	-56.8959
998	-56.748	-56.4587		-59.1212	-56.8729
999	-56.6888	-56.4883		-59.0193	-56.8236
1000	-56.7447	-56.4752		-59.0653	-56.7973
1001	-56.7513	-56.508		-58.97	-56.8236
1002	-56.6658	-56.5146		-59.039	-56.8597
1003	-56.6428	-56.5475		-58.9864	-56.8269
1004	-56.6888	-56.6395		-58.9765	-56.863
1005	-56.6296	-56.5836		-59.0028	-56.9057
1006	-56.5442	-56.5475		-58.8812	-56.886
1007	-56.5475	-56.5376		-58.9174	-56.9551
1008	-56.5606	-56.5573		-58.8878	-56.9551
1009	-56.5836	-56.6198		-58.8812	-56.8794
1010	-56.6395	-56.6329		-58.8188	-56.9616
1011	-56.5836	-56.6954		-58.8976	-56.9682
1012	-56.5508	-56.6329		-58.8286	-56.9485
1013	-56.508	-56.6625		-58.9667	-56.9353
1014	-56.4752	-56.6362		-58.8483	-56.9156
1015	-56.3897	-56.5869		-58.8418	-56.9518
1016	-56.416	-56.5935		-58.8385	-56.9748
1017	-56.5376	-56.6592		-58.7925	-56.9748
1018	-56.4653	-56.6625		-58.7925	-57.0011
1019	-56.4324	-56.6724		-58.7793	-57.0076
1020	-56.4686	-56.6099		-58.684	-57.0701
1021	-56.4226	-56.6527		-58.6051	-57.0208
1022	-56.4554	-56.6855		-58.615	-57.0865
1023	-56.3963	-56.7578		-58.5328	-57.0701
1024	-56.439	-56.7414		-58.615	-57.1227
1025	-56.3601	-56.7841		-58.6281	-57.1095
1026	-56.4982	-56.84		-58.5394	-57.0898
1027	-56.3371	-56.8334		-58.5854	-57.0832
1028	-56.3601	-56.886		-58.6018	-57.0372
1029	-56.3174	-56.8992		-58.5328	-57.0109
1030	-56.3963	-56.9485		-58.5295	-56.9813
1031	-56.4226	-56.8269		-58.5196	-57.0504
1032	-56.3503	-56.8696		-58.5262	-57.0734
1033	-56.3996	-56.8926		-58.5525	-57.0701
1034	-56.3765	-56.8959		-58.5196	-57.0898
1035	-56.3174	-56.817		-58.6544	-57.0471
1036	-56.2878	-56.8269		-58.5624	-57.0537
1037	-56.3404	-56.886		-58.5328	-57.1786
1038	-56.3042	-56.7743		-58.5558	-57.2147
1039	-56.2451	-56.7414		-58.4769	-57.2049
1040	-56.3108	-56.8104		-58.4309	-57.2246
1041	-56.3009	-56.7841		-58.4276	-57.2049
1042	-56.3831	-56.8334		-58.4013	-57.2114
1043	-56.3305	-56.8137		-58.3652	-57.2936
1044	-56.2878	-56.8663		-58.3619	-57.287
1045	-56.2911	-56.817		-58.4408	-57.1884
1046	-56.2451	-56.8203		-58.398	-57.149
1047	-56.2516	-56.9353		-58.3553	-57.2377
1048	-56.2155	-56.9288		-58.3126	-57.1687
1049	-56.2056	-56.9057		-58.3257	-57.1884
1050	-56.2615	-56.8236		-58.2633	-57.2344
1051	-56.1465	-56.9748		-58.3849	-57.2476
1052	-56.199	-56.9846		-58.3389	-57.264
1053	-56.1728	-56.9912		-58.3586	-57.3002
1054	-56.061	-57.0274		-58.3356	-57.1786
1055	-56.1136	-57.0635		-58.2994	-57.149
1056	-56.1399	-57.0175		-58.2205	-57.1424
1057	-56.1202	-57.0142		-58.26	-57.172
1058	-56.0972	-57.0405		-58.1975	-57.1161
1059	-56.0577	-57.0307		-58.1942	-57.0865
1060	-56.0906	-56.9879		-58.1384	-57.0307
1061	-55.9755	-57.0076		-58.2008	-57.0865
1062	-56.0479	-56.9715		-58.1219	-57.0011
1063	-55.9985	-56.9156		-58.2008	-57.0865
1064	-56.015	-56.9057		-58.0923	-57.1358
1065	-56.0972	-56.8992		-58.1186	-57.0076
1066	-56.1596	-56.8827		-58.0858	-57.0109
1067	-56.1103	-56.9255		-58.0858	-56.9748
1068	-56.1004	-56.9255		-58.0923	-56.9978
1069	-56.1399	-56.9518		-58.0134	-57.0208
1070	-56.176	-56.9583		-58.1416	-57.0043
1071	-56.1497	-56.8992		-58.1679	-56.9386
1072	-56.1136	-56.8433		-58.1942	-56.9255
1073	-56.13	-56.7578		-58.1153	-56.8959
1074	-56.1267	-56.7973		-58.0989	-56.817
1075	-56.2122	-56.794		-58.0595	-56.8696
1076	-56.2714	-56.8236		-58.1121	-56.8466
1077	-56.2188	-56.8071		-58.1285	-56.7315
1078	-56.2516	-56.7447		-58.043	-56.748
1079	-56.176	-56.794		-58.0529	-56.7973
1080	-56.3601	-56.6559		-58.0463	-56.725
1081	-56.3141	-56.6296		-58.0628	-56.7348
1082	-56.2845	-56.6757		-57.928	-56.7052
1083	-56.2516	-56.6461		-57.951	-56.7874
1084	-56.4324	-56.6494		-57.9148	-56.748
1085	-56.2977	-56.6099		-58.0299	-56.6658
1086	-56.4587	-56.5376		-58.0102	-56.6888
1087	-56.3765	-56.5442		-57.9872	-56.6231
1088	-56.4226	-56.6658		-57.9707	-56.6428
1089	-56.4028	-56.6461		-58.0726	-56.6264
1090	-56.3174	-56.6461		-58.0332	-56.6329
1091	-56.3864	-56.6888		-58.0562	-56.6461
1092	-56.3963	-56.6428		-58.1844	-56.577
1093	-56.37	-56.6132		-58.0858	-56.4784
1094	-56.3141	-56.6559		-58.1252	-56.5508
1095	-56.485	-56.6165		-58.1186	-56.462
1096	-56.4423	-56.5442		-58.1121	-56.5803
1097	-56.4982	-56.5705		-58.1219	-56.4883
1098	-56.4489	-56.5508		-58.1285	-56.393
1099	-56.4554	-56.5409		-58.2008	-56.462
1100	-56.4127	-56.5179		-58.1285	-56.5212
1101	-56.485	-56.485		-58.1055	-56.5475
1102	-56.4554	-56.4752		-58.0956	-56.5409
1103	-56.5343	-56.5277		-58.1252	-56.462
1104	-56.4489	-56.5376		-57.8294	-56.5475
1105	-56.4061	-56.5442		-58.375	-56.4324
1106	-56.5245	-56.2056		-58.02	-56.4949
1107	-56.416	-56.7808		-58.0759	-56.4916
1108	-56.4982	-56.3634		-58.043	-56.4489
1109	-56.4719	-56.439		-58.1022	-56.4686
1110	-56.4883	-56.4324		-58.1614	-56.3535
1111	-56.4094	-56.4094		-58.214	-56.3568
1112	-56.4554	-56.4258		-58.0891	-56.3338
1113	-56.3864	-56.4521		-58.0923	-56.3437
1114	-56.4456	-56.4587		-58.0891	-56.3042
1115	-56.4686	-56.3765		-58.0693	-56.1728
1116	-56.1826	-56.416		-58.1022	-56.3864
1117	-56.1728	-56.4521		-58.0036	-56.5014
1118	-56.3174	-56.4028		-57.9543	-56.3338
1119	-56.3338	-56.416		-57.951	-56.4324
1120	-56.3009	-56.4324		-58.0036	-56.3765
1121	-56.3272	-56.439		-57.9477	-56.4456
1122	-56.2516	-56.3733		-57.9806	-56.4784
1123	-56.2451	-56.3667		-58.0036	-56.508
1124	-56.2023	-56.3141		-58.0463	-56.485
1125	-56.2352	-56.2911		-58.0266	-56.4982
1126	-56.2023	-56.393		-58.0266	-56.5277
1127	-56.176	-56.324		-58.0562	-56.5376
1128	-56.1695	-56.3503		-58.0923	-56.577
1129	-56.1793	-56.3108		-58.0726	-56.6296
1130	-56.107	-56.2845		-58.1022	-56.5902
1131	-56.0807	-56.2549		-58.1811	-56.5869
1132	-56.0643	-56.37		-58.1877	-56.5902
1133	-56.0117	-56.3864		-58.0923	-56.5869
1134	-55.9821	-56.4521		-58.2008	-56.702
1135	-55.9427	-56.3733		-58.1712	-56.748
1136	-55.9427	-56.4061		-58.2403	-56.7973
1137	-55.9722	-56.3864		-58.283	-56.84
1138	-55.946	-56.3897		-58.306	-56.8926
1139	-55.9525	-56.3765		-58.2633	-56.8334
1140	-55.8736	-56.4357		-58.2271	-56.9353
1141	-55.9328	-56.3765		-58.1745	-56.8762
1142	-55.8901	-56.4061		-58.2074	-56.8762
1143	-55.8572	-56.3568		-58.1581	-56.9156
1144	-55.8802	-56.4028		-58.214	-56.909
1145	-55.8408	-56.4127		-58.1614	-56.9222
1146	-55.9197	-56.4521		-58.1581	-56.9452
1147	-55.8605	-56.4061		-57.9641	-56.9057
1148	-55.798	-56.416		-57.9576	-56.8794
1149	-55.7948	-56.4193		-57.9937	-56.9386
1150	-55.8178	-56.4521		-57.9806	-56.9156
1151	-55.8441	-56.4653		-57.9576	-56.9156
1152	-55.7257	-56.4883		-57.9181	-57.0043
1153	-55.8145	-56.5146		-57.9477	-56.9879
1154	-55.7487	-56.4587		-57.9444	-57.0602
1155	-55.9098	-56.4784		-57.9411	-57.0372
1156	-55.9032	-56.4883		-57.8918	-57.1194
1157	-55.8934	-56.5475		-57.9083	-57.1161
1158	-55.9788	-56.5146		-57.9017	-57.1161
1159	-55.9492	-56.5212		-57.9379	-57.0405
1160	-56.0314	-56.4587		-57.928	-56.9485
1161	-56.0281	-56.4916		-57.8918	-56.8729
1162	-55.946	-56.462		-57.9116	-56.9945
1163	-56.0051	-56.5376		-57.8754	-56.909
1164	-55.9821	-56.4883		-57.8918	-56.9288
1165	-55.9722	-56.4686		-57.8195	-57.0372
1166	-55.9361	-56.5146		-57.9083	-56.9846
1167	-55.9295	-56.5047		-57.8688	-57.0241
1168	-55.8408	-56.4784		-57.8918	-56.9649
1169	-55.8605	-56.4982		-57.7669	-57.0307
1170	-55.9328	-56.4357		-57.7867	-57.0274
1171	-55.9394	-56.5179		-57.7604	-56.9978
1172	-55.9722	-56.5113		-57.619	-57.0701
1173	-55.8704	-56.5014		-57.7275	-57.0471
1174	-56.0413	-56.531		-57.7373	-57.1391
1175	-55.8901	-56.5902		-57.7406	-57.0471
1176	-55.923	-56.554		-57.7012	-57.0274
1177	-55.9657	-56.577		-57.665	-56.9715
1178	-55.9591	-56.6132		-57.6124	-57.0997
1179	-55.9821	-56.5738		-57.6453	-57.1063
1180	-56.0446	-56.6231		-57.6354	-57.1556
1181	-56.0906	-56.5935		-57.688	-57.1424
1182	-56.0281	-56.6921		-57.7176	-57.2049
1183	-56.0741	-56.702		-57.7209	-57.1753
1184	-56.0873	-56.7085		-57.6749	-57.1884
1185	-56.1234	-56.6954		-57.6913	-57.2049
1186	-56.0774	-56.6691		-57.619	-57.2344
1187	-55.9657	-56.6724		-57.596	-57.264
1188	-55.9887	-56.7282		-57.6453	-57.3035
1189	-55.946	-56.7282		-57.596	-57.241
1190	-55.946	-56.8137		-57.5533	-57.3528
1191	-55.9197	-56.6888		-57.6157	-57.3495
1192	-55.8309	-56.6658		-57.6059	-57.2837
1193	-55.9065	-56.7282		-57.5697	-57.3626
1194	-55.8671	-56.7151		-57.55	-57.3199
1195	-55.8769	-56.7085		-57.5697	-57.4119
1196	-55.8802	-56.702		-57.5533	-57.4415
1197	-56.0117	-56.7085		-57.6091	-57.4974
1198	-55.9492	-56.7611		-57.6256	-57.4382
1199	-56.0117	-56.702		-57.527	-57.3824
1200	-55.9624	-56.6625		-57.573	-57.3495
1201	-55.9427	-56.6592		-57.6223	-57.3824
1202	-55.9492	-56.6954		-57.619	-57.4349
1203	-56.0117	-56.6888		-57.6157	-57.4678
1204	-56.0413	-56.6855		-57.5401	-57.5007
1205	-56.0248	-56.7841		-57.5631	-57.4087
1206	-56.0676	-56.7315		-57.5599	-57.6157
1207	-56.1103	-56.6888		-57.5467	-57.573
1208	-56.1695	-56.7513		-57.5763	-57.5368
1209	-56.1497	-56.6757		-57.5138	-57.5664
1210	-56.0906	-56.6395		-57.504	-57.5467
1211	-56.0807	-56.6888		-57.573	-57.5401
1212	-56.0577	-56.6757		-57.5796	-57.4941
1213	-56.1136	-56.7151		-57.5434	-57.5631
1214	-56.1399	-56.7381		-57.4612	-57.527
1215	-56.1136	-56.7217		-57.504	-57.5631
1216	-56.0544	-56.7414		-57.4612	-57.5336
1217	-56.0643	-56.7611		-57.5664	-57.5138
1218	-56.1497	-56.7217		-57.5467	-57.4941
1219	-56.0807	-56.7578		-57.6322	-57.5829
1220	-56.0676	-56.8499		-57.5829	-57.5664
1221	-56.176	-56.9123		-57.5237	-57.4842
1222	-56.2122	-56.863		-57.5927	-57.4448
1223	-56.1563	-56.8334		-57.5927	-57.4514
1224	-56.2911	-56.8926		-57.6059	-57.4021
1225	-56.2122	-56.9057		-57.5664	-57.4941
1226	-56.2484	-56.8564		-57.5697	-57.4415
1227	-56.2516	-56.9419		-57.4908	-57.4251
1228	-56.2779	-56.8597		-57.573	-57.4284
1229	-56.2253	-56.8104		-57.5763	-57.3265
1230	-56.2779	-56.8301		-57.4974	-57.3363
1231	-56.2451	-56.8203		-57.5073	-57.3396
1232	-56.2878	-56.909		-57.5796	-57.4744
1233	-56.2681	-56.932		-57.5631	-57.5336
1234	-56.3667	-56.9518		-57.5599	-57.4317
1235	-56.3042	-56.9386		-57.5105	-57.4711
1236	-56.393	-56.8466		-57.5007	-57.3692
1237	-56.3141	-56.8301		-57.5927	-57.3331
1238	-56.3141	-56.8696		-57.5631	-57.3561
1239	-56.324	-56.8466		-57.5993	-57.3659
1240	-56.3996	-56.9025		-57.665	-57.3298
1241	-56.3272	-56.8893		-57.7078	-57.2837
1242	-56.37	-56.8696		-57.6979	-57.2706
1243	-56.3667	-56.8729		-57.7406	-57.2213
1244	-56.4456	-56.8367		-57.6782	-57.1786
1245	-56.5113	-56.886		-57.6683	-57.195
1246	-56.5376	-56.8006		-57.7209	-57.1523
1247	-56.6132	-56.8466		-57.7078	-57.0997
1248	-56.5179	-56.8499		-57.7669	-57.1227
1249	-56.5277	-56.7611		-57.8162	-57.0241
1250	-56.6001	-56.8104		-57.7702	-56.9978
1251	-56.5606	-56.6921		-57.9609	-57.0274
1252	-56.6132	-56.6658		-57.8655	-57.1227
1253	-56.5968	-56.6822		-57.836	-57.0865
1254	-56.6231	-56.7611		-57.7373	-57.0471
1255	-56.6757	-56.6066		-57.8031	-56.9583
1256	-56.6724	-56.6494		-57.7669	-56.9748
1257	-56.6888	-56.6789		-57.7735	-57.0142
1258	-56.6954	-56.6296		-57.7834	-56.9419
1259	-56.6428	-56.6987		-57.7801	-56.9386
1260	-56.7184	-56.6691		-57.7341	-56.9846
1261	-56.7743	-56.6461		-57.7834	-56.9452
1262	-56.7874	-56.6395		-57.813	-56.9025
1263	-56.7611	-56.6001		-57.8162	-56.932
1264	-56.8006	-56.5935		-57.7801	-56.9156
1265	-56.771	-56.6855		-57.7275	-56.9222
1266	-56.7447	-56.6625		-57.6946	-56.909
1267	-56.8367	-56.5902		-57.6552	-56.886
1268	-56.7841	-56.6001		-57.7735	-56.8367
1269	-56.8203	-56.6329		-57.7604	-56.9156
1270	-56.794	-56.6033		-57.7505	-56.8926
1271	-56.7907	-56.577		-57.7078	-56.9156
1272	-56.8006	-56.5672		-57.7702	-56.8893
1273	-56.7644	-56.5442		-57.7965	-56.8696
1274	-56.8564	-56.5968		-57.8425	-56.8071
1275	-56.8301	-56.6494		-57.7801	-56.8729
1276	-56.8236	-56.5968		-57.7505	-56.8992
1277	-56.8532	-56.5573		-57.7998	-56.8794
1278	-56.8794	-56.5442		-57.813	-56.8663
1279	-56.863	-56.5014		-57.836	-56.817
1280	-56.9649	-56.4719		-57.7965	-56.8006
1281	-56.9485	-56.5442		-57.8294	-56.7282
1282	-56.8334	-56.4653		-57.8031	-56.8006
1283	-56.9748	-56.4719		-57.7768	-56.7776
1284	-56.8992	-56.4817		-57.7735	-56.8006
1285	-57.0307	-56.4587		-57.7143	-56.771
1286	-56.8269	-56.4456		-57.6552	-56.794
1287	-56.8269	-56.4752		-57.7275	-56.7874
1288	-56.8827	-56.3963		-57.7012	-56.7447
1289	-56.8663	-56.4456		-57.6946	-56.7315
1290	-56.8893	-56.4686		-57.7604	-56.7447
1291	-56.8006	-56.393		-57.7045	-56.7841
1292	-56.84	-56.508		-57.7505	-56.8039
1293	-56.8926	-56.4193		-57.7965	-56.8236
1294	-56.7808	-56.4752		-57.8228	-56.8039
1295	-56.817	-56.4258		-57.8327	-56.7052
1296	-56.7907	-56.4587		-57.7899	-56.7677
1297	-56.7414	-56.4324		-57.8162	-56.771
1298	-56.7578	-56.3897		-57.882	-56.7841
1299	-56.6822	-56.3207		-57.7768	-56.748
1300	-56.6592	-56.3503		-57.9707	-56.8532
1301	-56.6987	-56.3831		-57.9181	-56.8367
1302	-56.6099	-56.3831		-57.905	-56.932
1303	-56.6264	-56.2977		-57.9148	-56.9025
1304	-56.6066	-56.2352		-57.974	-56.9748
1305	-56.6033	-56.3634		-57.882	-56.9156
1306	-56.4752	-56.2582		-57.9379	-56.8532
1307	-56.4883	-56.3404		-57.951	-56.9781
1308	-56.4916	-56.3141		-57.8918	-56.9288
1309	-56.4719	-56.3009		-57.9674	-56.9452
1310	-56.4028	-56.2681		-57.9313	-56.932
1311	-56.3503	-56.2812		-57.9477	-56.886
1312	-56.3371	-56.3371		-57.9411	-56.8532
1313	-56.3338	-56.2155		-57.8853	-56.9222
1314	-56.3667	-56.2779		-57.8655	-56.9419
1315	-56.3305	-56.3733		-57.8918	-56.9386
1316	-56.2681	-56.3535		-57.8918	-56.8532
1317	-56.3404	-56.3207		-57.9148	-56.8762
1318	-56.3963	-56.324		-57.9707	-57.0372
1319	-56.2878	-56.3733		-57.9247	-57.0208
1320	-56.3075	-56.2352		-57.9576	-57.0307
1321	-56.2714	-56.2878		-58.0003	-57.057
1322	-56.2911	-56.4127		-57.974	-57.0898
1323	-56.2714	-56.2845		-57.9444	-56.9978
1324	-56.2451	-56.3963		-58.0069	-57.0405
1325	-56.2582	-56.4357		-57.9641	-57.0175
1326	-56.153	-56.2385		-57.882	-57.0109
1327	-56.2286	-56.2451		-57.7965	-56.9781
1328	-56.2911	-56.2845		-57.8261	-56.9978
1329	-56.2516	-56.2911		-57.7176	-57.0537
1330	-56.2451	-56.2385		-57.665	-57.1161
1331	-56.2286	-56.1859		-57.7341	-57.1391
1332	-56.2253	-56.199		-57.8064	-57.1687
1333	-56.2089	-56.1366		-57.7341	-57.195
1334	-56.1925	-56.1629		-57.7078	-57.1917
1335	-56.2681	-56.0906		-57.6913	-57.1194
1336	-56.3141	-56.176		-57.6815	-57.1654
1337	-56.2221	-56.1596		-57.5664	-57.195
1338	-56.2418	-56.1563		-57.573	-57.1851
1339	-56.2648	-56.1563		-57.6585	-57.2903
1340	-56.2023	-56.176		-57.6552	-57.1654
1341	-56.2451	-56.2155		-57.6354	-57.2706
1342	-56.2221	-56.2023		-57.6848	-57.2837
1343	-56.2221	-56.1596		-57.665	-57.2246
1344	-56.2451	-56.2056		-57.6519	-57.3035
1345	-56.153	-56.2188		-57.596	-57.3495
1346	-56.2582	-56.2056		-57.5105	-57.2607
1347	-56.3042	-56.2286		-57.4514	-57.287
1348	-56.2648	-56.199		-57.4777	-57.3396
1349	-56.2089	-56.1892		-57.4645	-57.4284
1350	-56.1662	-56.3667		-57.3068	-57.3002
1351	-56.2188	-56.3174		-57.3462	-57.3232
1352	-56.1826	-56.3174		-57.3495	-57.3298
1353	-56.199	-56.2681		-57.264	-57.3955
1354	-56.176	-56.3996		-57.3363	-57.3298
1355	-56.199	-56.3831		-57.3068	-57.4448
1356	-56.2286	-56.4226		-57.3035	-57.4284
1357	-56.2911	-56.4653		-57.3166	-57.4087
1358	-56.2385	-56.485		-57.1358	-57.4284
1359	-56.2648	-56.4916		-57.264	-57.5237
1360	-56.2451	-56.531		-57.1983	-57.4974
1361	-56.2878	-56.5409		-57.2213	-57.481
1362	-56.2977	-56.5968		-57.1556	-57.458
1363	-56.2352	-56.5803		-57.2246	-57.5533
1364	-56.3009	-56.6428		-57.1523	-57.4777
1365	-56.324	-56.6066		-57.1194	-57.5237
1366	-56.2714	-56.6362		-57.1391	-57.5664
1367	-56.324	-56.6724		-57.1753	-57.5434
1368	-56.3765	-56.6527		-57.1851	-57.6519
1369	-56.3404	-56.7151		-57.2213	-57.6946
1370	-56.3338	-56.6954		-57.1588	-57.6913
1371	-56.3733	-56.771		-57.1753	-57.7045
1372	-56.3798	-56.8466		-57.2049	-57.5829
1373	-56.3634	-56.8104		-57.2574	-57.6354
1374	-56.4653	-56.9123		-57.241	-57.6617
1375	-56.4193	-56.8827		-57.218	-57.6453
1376	-56.3404	-56.8696		-57.1621	-57.6519
1377	-56.3174	-56.9452		-57.1753	-57.6157
1378	-56.2253	-56.9748		-57.2016	-57.6519
1379	-56.2746	-56.9978		-57.0898	-57.6387
1380	-56.3042	-57.0175		-57.1293	-57.6026
1381	-56.3272	-57.0865		-57.1358	-57.5894
1382	-56.2845	-57.0438		-57.1424	-57.7012
1383	-56.3831	-57.0668		-57.1753	-57.688
1384	-56.3207	-57.0701		-57.1654	-57.7275
1385	-56.3535	-57.1095		-57.2279	-57.7308
1386	-56.4127	-57.0405		-57.1457	-57.7143
1387	-56.3568	-57.0372		-57.2246	-57.7472
1388	-56.393	-57.1128		-57.241	-57.7538
1389	-56.3996	-57.0175		-57.2706	-57.7012
1390	-56.3996	-57.057		-57.2509	-57.7045
1391	-56.416	-57.0339		-57.3692	-57.6552
1392	-56.3535	-57.0011		-57.3298	-57.5697
1393	-56.4817	-56.9846		-57.3363	-57.7012
1394	-56.4489	-57.0076		-57.4974	-57.6848
1395	-56.4357	-56.9912		-57.3856	-57.7669
1396	-56.5803	-56.9518		-57.4382	-57.7209
1397	-56.5738	-56.9682		-57.5105	-57.6617
1398	-56.531	-56.9616		-57.4251	-57.5894
1399	-56.5672	-57.0767		-57.3692	-57.6322
1400	-56.5573	-57.0865		-57.2542	-57.5993
1401	-56.5409	-57.1621		-57.4218	-57.6256
1402	-56.6461	-57.103		-57.4218	-57.6683
1403	-56.6658	-57.1556		-57.3988	-57.6552
1404	-56.6921	-57.1063		-57.3396	-57.6453
1405	-56.7578	-57.149		-57.4218	-57.665
1406	-56.6921	-57.1227		-57.4415	-57.6815
1407	-56.725	-57.1325		-57.3725	-57.7965
1408	-56.7808	-57.126		-57.4021	-57.6815
1409	-56.7348	-57.126		-57.4777	-57.6124
1410	-56.8104	-57.1194		-57.4481	-57.6354
1411	-56.8367	-57.0076		-57.5171	-57.711
1412	-56.8104	-57.0109		-57.4185	-57.6979
1413	-56.9057	-57.0208		-57.5171	-57.7801
1414	-57.0142	-56.9945		-57.4152	-57.7702
1415	-56.9419	-56.9715		-57.504	-57.7834
1416	-57.0274	-56.9518		-57.5007	-57.8195
1417	-57.0175	-56.9715		-57.5007	-57.7702
1418	-57.126	-57.0043		-57.5105	-57.836
1419	-57.0471	-57.0372		-57.5664	-57.7373
1420	-57.126	-56.9551		-57.5105	-57.6683
1421	-57.126	-56.9419		-57.5993	-57.6157
1422	-57.1325	-56.9255		-57.573	-57.6716
1423	-57.1161	-57.0307		-57.7439	-57.6716
1424	-57.1917	-57.0011		-57.6223	-57.7045
1425	-57.1786	-56.932		-57.6387	-57.7242
1426	-57.2443	-56.9419		-57.6322	-57.7505
1427	-57.1786	-56.9518		-57.6322	-57.7604
1428	-57.1786	-56.9649		-57.6354	-57.7176
1429	-57.2147	-56.9879		-57.688	-57.7538
1430	-57.2213	-56.9846		-57.619	-57.7308
1431	-57.241	-56.9189		-57.6519	-57.7899
1432	-57.241	-56.9781		-57.6091	-57.7604
1433	-57.2016	-56.9222		-57.665	-57.7012
1434	-57.2542	-56.9649		-57.6026	-57.7308
1435	-57.3363	-56.886		-57.6519	-57.6124
1436	-57.2805	-56.8236		-57.5697	-57.642
1437	-57.3035	-56.771		-57.55	-57.5894
1438	-57.2772	-56.8762		-57.527	-57.6059
1439	-57.3166	-56.8137		-57.5599	-57.5303
1440	-57.2673	-56.7184		-57.5796	-57.5829
1441	-57.2377	-56.7447		-57.6091	-57.619
1442	-57.2772	-56.7184		-57.5697	-57.5566
1443	-57.2673	-56.6658		-57.5927	-57.5007
1444	-57.264	-56.6198		-57.5566	-57.5336
1445	-57.3002	-56.7381		-57.504	-57.5336
1446	-57.1983	-56.6691		-57.4415	-57.5401
1447	-57.2344	-56.7151		-57.5697	-57.5533
1448	-57.1983	-56.6888		-57.5697	-57.55
1449	-57.2081	-56.7085		-57.5894	-57.4908
1450	-57.172	-56.5508		-57.5697	-57.5467
1451	-57.1851	-56.6033		-57.5664	-57.573
1452	-57.0964	-56.5836		-57.619	-57.573
1453	-57.0602	-56.5836		-57.642	-57.55
1454	-57.0701	-56.5639		-57.596	-57.5697
1455	-57.057	-56.5277		-57.6585	-57.4941
1456	-57.1095	-56.5277		-57.6946	-57.504
1457	-57.1391	-56.4784		-57.6617	-57.4349
1458	-57.0142	-56.4554		-57.7209	-57.4415
1459	-56.9583	-56.3864		-57.7341	-57.4908
1460	-56.9781	-56.3733		-57.7735	-57.4547
1461	-56.9978	-56.3371		-57.7932	-57.4284
1462	-56.9485	-56.3305		-57.7406	-57.4678
1463	-56.8762	-56.2549		-57.8327	-57.4218
1464	-56.7644	-56.2023		-57.8162	-57.4415
1465	-56.7052	-56.2582		-57.9017	-57.458
1466	-56.7282	-56.1925		-57.905	-57.504
1467	-56.6789	-56.2155		-57.8754	-57.4711
1468	-56.6264	-56.0972		-57.9181	-57.3791
1469	-56.6198	-56.176		-57.9411	-57.3889
1470	-56.5968	-56.1695		-57.8951	-57.4645
1471	-56.4653	-56.0709		-57.9346	-57.4284
1472	-56.4127	-56.107		-57.9116	-57.4875
1473	-56.4193	-56.084		-57.9247	-57.4284
1474	-56.3798	-56.0709		-57.9773	-57.3725
1475	-56.4291	-56.061		-57.9674	-57.3955
1476	-56.3371	-56.0709		-57.9411	-57.4842
1477	-56.2484	-56.153		-57.9543	-57.4744
1478	-56.2911	-56.0741		-57.9379	-57.481
1479	-56.2253	-56.0446		-57.9148	-57.4711
1480	-56.1695	-55.9887		-57.9674	-57.458
1481	-56.2516	-55.969		-57.9017	-57.4349
1482	-56.199	-55.9887		-57.9904	-57.4645
1483	-56.1103	-55.9032		-57.9806	-57.4547
1484	-56.2385	-56.0183		-57.9904	-57.3824
1485	-56.1103	-56.0709		-57.997	-57.3561
1486	-56.1596	-56.0051		-57.9148	-57.4054
1487	-56.0873	-55.9953		-57.9477	-57.3955
1488	-56.0906	-56.038		-57.8557	-57.3758
1489	-56.0873	-56.0413		-57.8195	-57.3856
1490	-55.9755	-55.9985		-57.905	-57.3626
1491	-55.969	-56.1497		-57.9214	-57.3824
1492	-55.9525	-56.0906		-57.9181	-57.3692
1493	-56.0216	-56.0248		-57.8622	-57.3561
1494	-55.923	-56.0807		-57.9116	-57.31
1495	-55.9131	-56.0413		-57.8721	-57.3593
1496	-55.8638	-56.0709		-57.905	-57.3331
1497	-55.8342	-56.0676		-57.951	-57.2903
1498	-55.8473	-56.0741		-57.8885	-57.3922
1499	-55.8539	-56.107		-57.974	-57.3659
1500	-55.8046	-56.0117		-57.9017	-57.3462
1501	-55.8605	-56.0479		-57.8557	-57.4251
1502	-55.775	-55.992		-57.8754	-57.3068
1503	-55.7454	-56.0281		-57.7867	-57.3495
1504	-55.7159	-55.9821		-57.7702	-57.3824
1505	-55.6468	-56.0577		-57.8392	-57.4251
1506	-55.6468	-56.0183		-57.7702	-57.4317
1507	-55.6107	-56.0183		-57.8162	-57.3824
1508	-55.5647	-56.0643		-57.8294	-57.4054
1509	-55.5943	-56.1037		-57.905	-57.3922
1510	-55.7126	-56.2089		-57.8261	-57.5204
1511	-55.7093	-56.1563		-57.8655	-57.5336
1512	-55.5647	-56.1202		-57.8655	-57.5664
1513	-55.5384	-56.2089		-57.8622	-57.4645
1514	-55.4628	-56.2385		-57.8688	-57.5171
1515	-55.5647	-56.2352		-57.7373	-57.4941
1516	-55.5449	-56.199		-57.8294	-57.5763
1517	-55.443	-56.1793		-57.8622	-57.4777
1518	-55.3576	-56.1793		-57.7801	-57.6157
1519	-55.3346	-56.1892		-57.8327	-57.5105
1520	-55.397	-56.199		-57.7636	-57.5664
1521	-55.3477	-56.2319		-57.8064	-57.5303
1522	-55.3707	-56.2681		-57.8064	-57.619
1523	-55.4135	-56.3272		-57.7899	-57.5993
1524	-55.3872	-56.3503		-57.8688	-57.6486
1525	-55.4529	-56.3864		-57.8425	-57.504
1526	-55.4496	-56.3864		-57.9017	-57.5631
1527	-55.5022	-56.439		-57.8754	-57.6026
1528	-55.5055	-56.4028		-57.9346	-57.5105
1529	-55.4529	-56.4324		-57.8392	-57.642
1530	-55.4759	-56.4094		-57.8524	-57.6091
1531	-55.4924	-56.4883		-58.043	-57.5599
1532	-55.5154	-56.4324		-58.0069	-57.5664
1533	-55.4891	-56.3996		-57.8853	-57.5763
1534	-55.5614	-56.4653		-57.9444	-57.5105
1535	-55.5712	-56.4719		-57.9773	-57.4777
1536	-55.5745	-56.485		-57.9773	-57.55
1537	-55.6173	-56.5277		-58.0266	-57.6026
1538	-55.6173	-56.5014		-57.9214	-57.5927
1539	-55.6764	-56.6066		-57.9707	-57.596
1540	-55.6994	-56.5803		-57.9543	-57.5993
1541	-55.7487	-56.6461		-57.9346	-57.642
1542	-55.8342	-56.6691		-58.0233	-57.5631
1543	-55.8013	-56.6987		-57.8885	-57.5927
1544	-55.8276	-56.6954		-57.8097	-57.5829
1545	-55.8539	-56.6987		-57.711	-57.5401
1546	-55.8178	-56.7414		-57.7373	-57.596
1547	-55.8572	-56.7874		-57.6519	-57.5073
1548	-55.8309	-56.6822		-57.7045	-57.481
1549	-55.9624	-56.7743		-57.7834	-57.6354
1550	-55.9525	-56.7184		-57.7012	-57.5599
1551	-55.9985	-56.7052		-57.7176	-57.6256
1552	-56.0314	-56.7611		-57.6585	-57.6223
1553	-56.0774	-56.8762		-57.6026	-57.6617
1554	-56.0709	-56.8071		-57.6124	-57.6749
1555	-56.1202	-56.9123		-57.5073	-57.6124
1556	-56.1793	-56.9025		-57.5171	-57.6124
1557	-56.0676	-56.8696		-57.4284	-57.7406
1558	-56.1432	-56.9025		-57.4842	-57.6387
1559	-56.0939	-56.9057		-57.4514	-57.7176
1560	-56.1234	-56.8893		-57.5007	-57.6946
1561	-56.1169	-56.8992		-57.4415	-57.6716
1562	-56.1695	-56.8696		-57.4284	-57.688
1563	-56.1793	-56.8499		-57.3955	-57.7176
1564	-56.2122	-56.7513		-57.3462	-57.6848
1565	-56.2089	-56.8236		-57.4284	-57.7439
1566	-56.2352	-56.8236		-57.3758	-57.665
1567	-56.1695	-56.8236		-57.3593	-57.6519
1568	-56.2155	-56.8071		-57.3561	-57.7242
1569	-56.2944	-56.8827		-57.4547	-57.6716
1570	-56.2516	-56.7808		-57.4382	-57.665
1571	-56.3075	-56.84		-57.3298	-57.7012
1572	-56.4028	-56.8532		-57.3495	-57.573
1573	-56.4094	-56.817		-57.3462	-57.6289
1574	-56.4423	-56.8762		-57.3035	-57.5861
1575	-56.5146	-56.886		-57.264	-57.5073
1576	-56.4094	-56.9551		-57.2837	-57.5434
1577	-56.4291	-56.9452		-57.2706	-57.573
1578	-56.5113	-57.0109		-57.3166	-57.573
1579	-56.4982	-56.9748		-57.2607	-57.6453
1580	-56.5573	-56.9945		-57.2969	-57.6552
1581	-56.5475	-57.057		-57.2936	-57.6552
1582	-56.6165	-57.0504		-57.2837	-57.6552
1583	-56.6428	-57.0307		-57.3298	-57.6354
1584	-56.6822	-57.0109		-57.3232	-57.6815
1585	-56.6987	-57.0635		-57.3626	-57.5796
1586	-56.7447	-56.9879		-57.3462	-57.5631
1587	-56.7611	-56.9879		-57.4251	-57.6848
1588	-56.794	-56.9518		-57.3298	-57.6289
1589	-56.771	-56.9748		-57.4218	-57.6289
1590	-56.863	-57.0537		-57.3922	-57.5697
1591	-56.9386	-56.9781		-57.4284	-57.5303
1592	-57.0602	-57.0865		-57.4744	-57.5861
1593	-56.9813	-57.0043		-57.5467	-57.573
1594	-56.9189	-57.0208		-57.619	-57.6091
1595	-56.9255	-57.0701		-57.5993	-57.527
1596	-56.9781	-57.0142		-57.5829	-57.5533
1597	-57.0635	-57.0043		-57.6157	-57.573
1598	-57.0274	-56.9123		-57.6256	-57.6289
1599	-56.9419	-56.9616		-57.6387	-57.5927
1600	-57.0339	-57.0175		-57.7439	-57.5599
1601	-57.0307	-57.0504		-57.7373	-57.5336
1602	-56.9813	-57.0734		-57.7439	-57.5073
1603	-57.0898	-57.0307		-57.7702	-57.55
1604	-57.1753	-57.0668		-57.7735	-57.5401
1605	-57.149	-56.9945		-57.7801	-57.504
1606	-57.1884	-56.932		-57.8162	-57.4251
1607	-57.2279	-56.9189		-57.711	-57.4941
1608	-57.2607	-56.9189		-57.7669	-57.4547
1609	-57.3166	-56.932		-57.7143	-57.4941
1610	-57.2049	-56.8959		-57.6354	-57.4481
1611	-57.3035	-56.9353		-57.7209	-57.5631
1612	-57.2607	-56.8926		-57.7406	-57.573
1613	-57.2805	-56.9912		-57.7341	-57.5829
1614	-57.3298	-56.9912		-57.665	-57.504
1615	-57.3659	-56.9715		-57.7078	-57.6157
1616	-57.3758	-57.0339		-57.7012	-57.5138
1617	-57.3791	-56.886		-57.7341	-57.4744
1618	-57.4185	-56.8827		-57.7834	-57.5204
1619	-57.458	-56.9846		-57.7867	-57.5763
1620	-57.4842	-56.9813		-57.7406	-57.5467
1621	-57.4547	-56.9386		-57.7801	-57.5861
1622	-57.4908	-56.8926		-57.7341	-57.5237
1623	-57.5138	-56.9288		-57.7472	-57.4481
1624	-57.5599	-56.9649		-57.7735	-57.5204
1625	-57.6256	-56.9353		-57.7571	-57.5303
1626	-57.573	-56.8992		-57.8458	-57.5204
1627	-57.5796	-56.9649		-57.8524	-57.6091
1628	-57.6059	-57.0076		-57.9083	-57.5829
1629	-57.6749	-57.057		-57.8918	-57.6913
1630	-57.6683	-57.103		-57.882	-57.6322
1631	-57.7143	-57.0471		-57.905	-57.6617
1632	-57.7176	-57.0208		-57.9641	-57.6913
1633	-57.7078	-57.1194		-57.997	-57.6749
1634	-57.6716	-57.0372		-57.951	-57.619
1635	-57.7308	-57.1227		-58.0332	-57.6617
1636	-57.7472	-57.0668		-58.02	-57.6091
1637	-57.7209	-57.0701		-58.0858	-57.6453
1638	-57.711	-57.1293		-58.1449	-57.5861
1639	-57.7636	-57.0438		-58.1186	-57.6585
1640	-57.7932	-57.1128		-58.1844	-57.7176
1641	-57.813	-56.9945		-58.1778	-57.6913
1642	-57.8524	-57.0109		-58.1942	-57.7275
1643	-57.8622	-56.9978		-58.1219	-57.6848
1644	-57.8458	-57.0241		-58.2205	-57.7308
1645	-57.7571	-57.0307		-58.3093	-57.6815
1646	-57.8524	-56.9386		-58.2337	-57.7702
1647	-57.928	-56.9518		-58.214	-57.7176
1648	-57.8195	-56.9189		-58.3126	-57.7275
1649	-57.8688	-56.9123		-58.3553	-57.7209
1650	-57.8655	-56.9452		-58.3849	-57.7341
1651	-57.8064	-56.9419		-58.3553	-57.7341
1652	-57.8228	-56.9288		-58.3487	-57.7012
1653	-57.8097	-56.9551		-58.2994	-57.6979
1654	-57.7899	-57.0011		-58.2205	-57.7702
1655	-57.8491	-57.0504		-58.2271	-57.8162
1656	-57.8261	-57.0602		-58.2501	-57.7801
1657	-57.7899	-57.1227		-58.2435	-57.7735
1658	-57.6979	-56.9978		-58.1877	-57.7505
1659	-57.8228	-57.0307		-58.2633	-57.836
1660	-57.8261	-57.0043		-58.26	-57.7834
1661	-57.7604	-57.0701		-58.2238	-57.7932
1662	-57.7801	-57.1358		-58.237	-57.7965
1663	-57.7735	-57.1588		-58.1778	-57.7636
1664	-57.7636	-57.0208		-58.2172	-57.7965
1665	-57.7998	-57.1161		-58.2435	-57.7472
1666	-57.8162	-57.1128		-58.1942	-57.7768
1667	-57.8228	-57.1753		-58.1745	-57.7636
1668	-57.9707	-57.1325		-58.1186	-57.8195
1669	-57.9313	-57.172		-58.1022	-57.7373
1670	-57.9411	-57.1654		-58.1022	-57.7932
1671	-57.9083	-57.218		-58.0134	-57.7143
1672	-57.9839	-57.2049		-58.0397	-57.7176
1673	-57.9543	-57.172		-57.9576	-57.7176
1674	-57.9707	-57.1818		-57.7867	-57.6453
1675	-57.882	-57.218		-57.7078	-57.7538
1676	-57.9017	-57.2049		-57.596	-57.7472
1677	-57.9148	-57.1457		-57.6289	-57.7571
1678	-57.9247	-57.1424		-57.596	-57.7406
1679	-57.8787	-57.0931		-57.4612	-57.7439
1680	-57.9444	-57.0898		-57.4152	-57.7341
1681	-57.9477	-57.2049		-57.2706	-57.8458
1682	-57.8853	-57.2147		-57.1556	-57.8622
1683	-57.8951	-57.3593		-57.0471	-57.7538
1684	-57.9148	-57.3068		-57.0372	-57.8097
1685	-57.9543	-57.2081		-57.0109	-57.7768
1686	-58.02	-57.2049		-56.9978	-57.7735
1687	-58.0102	-57.2312		-56.8663	-57.7899
1688	-57.9937	-57.2739		-56.817	-57.7998
1689	-57.9904	-57.31		-56.8762	-57.7669
1690	-57.9148	-57.2903		-56.7414	-57.7439
1691	-57.928	-57.2739		-56.725	-57.8392
1692	-57.974	-57.3396		-56.6231	-57.7801
1693	-57.9313	-57.2805		-56.6691	-57.8261
1694	-57.9346	-57.2377		-56.6033	-57.7965
1695	-57.9444	-57.1917		-56.5343	-57.7538
1696	-57.9148	-57.3791		-56.5146	-57.7735
1697	-57.8655	-57.3626		-56.531	-57.7045
1698	-57.8787	-57.3725		-56.4554	-57.7538
1699	-57.8557	-57.3331		-56.3897	-57.7308
1700	-57.8557	-57.3791		-56.347	-57.7834
1701	-57.8655	-57.3298		-56.3733	-57.596
1702	-57.8228	-57.3298		-56.3634	-57.6453
1703	-57.8162	-57.2344		-56.2418	-57.573
1704	-57.7834	-57.241		-56.1892	-57.5467
1705	-57.6946	-57.31		-56.2056	-57.5467
1706	-57.7472	-57.3824		-56.1728	-57.4941
1707	-57.6979	-57.3199		-56.1563	-57.5204
1708	-57.6716	-57.3199		-56.1432	-57.5401
1709	-57.6848	-57.3331		-56.0577	-57.5829
1710	-57.6552	-57.3331		-56.0709	-57.5861
1711	-57.5927	-57.2772		-55.9887	-57.527
1712	-57.619	-57.3495		-56.0511	-57.4842
1713	-57.5303	-57.2837		-56.1136	-57.504
1714	-57.55	-57.2509		-56.084	-57.4941
1715	-57.5237	-57.2542		-56.0873	-57.481
1716	-57.5861	-57.2279		-56.0018	-57.4152
1717	-57.5993	-57.2114		-56.0216	-57.4744
1718	-57.5894	-57.195		-55.9755	-57.4054
1719	-57.5599	-57.1523		-55.9492	-57.3462
1720	-57.5138	-57.1523		-55.9525	-57.3298
1721	-57.527	-57.1128		-55.9394	-57.2509
1722	-57.4941	-57.0832		-55.9295	-57.2344
1723	-57.4514	-56.9682		-55.9328	-57.2739
1724	-57.4087	-56.9978		-55.8605	-57.2574
1725	-57.3396	-56.9419		-55.8671	-57.2312
1726	-57.3824	-57.0405		-55.8999	-57.2049
1727	-57.2739	-56.9255		-55.8408	-57.172
1728	-57.3363	-56.9288		-55.9427	-57.0767
1729	-57.3331	-56.8926		-55.8999	-57.0865
1730	-57.2706	-56.9879		-55.8736	-57.0865
1731	-57.2673	-57.0372		-55.7882	-57.0997
1732	-57.2049	-56.9715		-55.7454	-57.0504
1733	-57.2049	-56.9583		-55.7717	-57.0832
1734	-57.103	-56.9353		-55.7389	-57.1161
1735	-57.1654	-56.9288		-55.7816	-57.0734
1736	-57.1194	-56.9452		-55.7159	-57.0175
1737	-57.1358	-56.9616		-55.8013	-56.9452
1738	-57.0997	-56.8532		-55.8276	-56.9123
1739	-57.0964	-56.8039		-55.7652	-56.9748
1740	-57.0734	-56.7414		-55.7783	-56.8696
1741	-57.1095	-56.8071		-55.8309	-56.9057
1742	-57.0734	-56.7184		-55.798	-56.84
1743	-57.0307	-56.6888		-55.6501	-56.7578
1744	-57.0734	-56.6757		-55.7257	-56.7447
1745	-57.08	-56.7381		-55.7356	-56.7611
1746	-57.0865	-56.702		-55.7422	-56.7578
1747	-57.1128	-56.7677		-55.7126	-56.7874
1748	-57.0307	-56.7282		-55.752	-56.7085
1749	-57.0372	-56.7217		-55.7783	-56.7348
1750	-57.0405	-56.6724		-55.6961	-56.7217
1751	-57.0208	-56.6461		-55.752	-56.6921
1752	-57.08	-56.6757		-55.7948	-56.7743
1753	-57.1194	-56.6494		-55.8013	-56.7151
1754	-57.1654	-56.6494		-55.8013	-56.7348
1755	-57.2147	-56.6198		-55.8572	-56.7447
1756	-57.1786	-56.6066		-55.798	-56.7381
1757	-57.1818	-56.7348		-55.8243	-56.7184
1758	-57.1457	-56.7151		-55.7159	-56.702
1759	-57.2344	-56.6428		-55.7685	-56.7118
1760	-57.1358	-56.6855		-55.7685	-56.6888
1761	-57.1687	-56.6855		-55.7389	-56.6921
1762	-57.1588	-56.6987		-55.7652	-56.6362
1763	-57.2081	-56.6198		-55.7717	-56.7217
1764	-57.0931	-56.6001		-55.8309	-56.6724
1765	-57.1391	-56.6494		-55.8539	-56.6527
1766	-57.1358	-56.8203		-55.8539	-56.7151
1767	-57.2016	-56.8104		-55.9131	-56.6757
1768	-57.1818	-56.7282		-55.8539	-56.6987
1769	-57.1884	-56.7578		-55.9722	-56.6691
1770	-57.2114	-56.748		-55.8506	-56.6855
1771	-57.264	-56.7513		-55.821	-56.6198
1772	-57.2476	-56.8071		-55.7915	-56.7545
1773	-57.2279	-56.7381		-55.8704	-56.6987
1774	-57.2772	-56.794		-55.8967	-56.7217
1775	-57.2476	-56.8269		-55.8736	-56.7348
1776	-57.1983	-56.8532		-55.9197	-56.6954
1777	-57.195	-56.8137		-55.8868	-56.7118
1778	-57.1621	-56.8466		-55.9361	-56.6264
1779	-57.2542	-56.7973		-55.9755	-56.6296
1780	-57.2772	-56.8334		-56.0117	-56.6461
1781	-57.2772	-56.8532		-56.061	-56.725
1782	-57.3232	-56.8959		-56.0413	-56.8236
1783	-57.2772	-56.909		-56.0807	-56.7677
1784	-57.2772	-56.9189		-56.1826	-56.8104
1785	-57.241	-56.9353		-56.153	-56.7611
1786	-57.2016	-56.9912		-56.2221	-56.8039
1787	-57.2673	-56.9715		-56.2451	-56.7841
1788	-57.2706	-57.0274		-56.2977	-56.8597
1789	-57.3002	-56.9846		-56.347	-56.9255
1790	-57.3298	-57.0175		-56.2878	-56.9353
1791	-57.3922	-57.057		-56.3503	-56.8039
1792	-57.4054	-57.0767		-56.4653	-56.8893
1793	-57.3166	-57.1095		-56.4258	-56.9551
1794	-57.3331	-57.1128		-56.462	-57.0076
1795	-57.3758	-57.1227		-56.5014	-57.0865
1796	-57.4744	-57.1424		-56.554	-57.0011
1797	-57.504	-57.103		-56.6296	-57.0043
1798	-57.4711	-57.0635		-56.6428	-57.0668
1799	-57.4941	-57.2805		-56.6789	-57.0471
1800	-57.5894	-57.1194		-56.6395	-57.1621
1801	-57.6223	-57.0964		-56.771	-57.1556
1802	-57.6026	-57.1687		-56.8729	-57.2509
1803	-57.5829	-57.1556		-56.863	-57.2344
1804	-57.6913	-57.1391		-56.9649	-57.3002
1805	-57.7209	-57.1588		-56.9945	-57.3166
1806	-57.711	-57.1621		-56.9945	-57.3593
1807	-57.7209	-57.2081		-56.9781	-57.481
1808	-57.8031	-57.2443		-57.0274	-57.4119
1809	-57.7275	-57.2739		-56.9879	-57.4119
1810	-57.7176	-57.2246		-57.1325	-57.458
1811	-57.6552	-57.2837		-57.08	-57.4744
1812	-57.711	-57.2936		-57.1128	-57.4875
1813	-57.688	-57.3035		-57.1753	-57.4251
1814	-57.8294	-57.3363		-57.0734	-57.4711
1815	-57.7636	-57.3955		-57.1391	-57.5697
1816	-57.7801	-57.3002		-57.1424	-57.5796
1817	-57.7143	-57.3528		-57.1556	-57.55
1818	-57.7867	-57.4152		-57.2377	-57.5566
1819	-57.7373	-57.5073		-57.1424	-57.5599
1820	-57.6716	-57.4021		-57.2049	-57.5467
1821	-57.8031	-57.4481		-57.2377	-57.7078
1822	-57.8787	-57.481		-57.1983	-57.6387
1823	-57.8327	-57.6026		-57.2509	-57.7373
1824	-57.8392	-57.5237		-57.1457	-57.7439
1825	-57.8557	-57.5073		-57.2837	-57.6782
1826	-57.8688	-57.4974		-57.2279	-57.6683
1827	-57.9411	-57.6124		-57.3692	-57.7308
1828	-57.9411	-57.6124		-57.264	-57.6913
1829	-57.9872	-57.6124		-57.4152	-57.6782
1830	-57.9641	-57.6683		-57.3429	-57.7505
1831	-57.9214	-57.5796		-57.3363	-57.7801
1832	-57.8064	-57.5993		-57.3856	-57.8064
1833	-57.8195	-57.6815		-57.3199	-57.7538
1834	-57.882	-57.5204		-57.3068	-57.8064
1835	-57.9181	-57.5861		-57.3725	-57.8162
1836	-57.8885	-57.688		-57.3561	-57.7439
1837	-57.8491	-57.688		-57.4218	-57.7834
1838	-57.8491	-57.7406		-57.4448	-57.7406
1839	-57.8655	-57.6815		-57.4547	-57.8524
1840	-57.9017	-57.7209		-57.4908	-57.8918
1841	-57.9214	-57.7604		-57.5073	-57.9083
1842	-57.8918	-57.8294		-57.4612	-57.9181
1843	-57.8853	-57.8622		-57.4054	-57.951
1844	-57.9116	-57.7965		-57.4744	-57.928
1845	-57.8458	-57.8031		-57.4941	-57.9411
1846	-57.9313	-57.8097		-57.6289	-57.905
1847	-57.882	-57.7801		-57.5631	-57.951
1848	-57.8984	-57.7636		-57.5829	-57.9083
1849	-57.9543	-57.8392		-57.6091	-57.928
1850	-57.9806	-57.8655		-57.573	-57.9379
1851	-57.9444	-57.905		-57.5927	-57.905
1852	-57.9247	-57.9346		-57.5368	-57.9641
1853	-58.0299	-57.9806		-57.4481	-57.9346
1854	-57.9148	-57.9346		-57.5861	-57.9181
1855	-58.0397	-57.9773		-57.5401	-57.9674
1856	-57.9904	-57.9937		-57.5533	-57.9411
1857	-57.9576	-57.9707		-57.5401	-57.9641
1858	-58.0299	-57.8622		-57.5599	-57.9083
1859	-58.1351	-57.8853		-57.4941	-57.9313
1860	-58.1055	-57.905		-57.4251	-57.8655
1861	-58.0496	-57.9346		-57.4317	-57.9313
1862	-58.1482	-57.9444		-57.3824	-57.8392
1863	-58.1548	-57.9346		-57.3856	-57.7834
1864	-58.1285	-58.0562		-57.3988	-57.7538
1865	-58.1811	-58.0595		-57.4317	-57.7308
1866	-58.1548	-58.1088		-57.4021	-57.7801
1867	-58.214	-58.1186		-57.3692	-57.7373
1868	-58.1712	-58.1252		-57.3331	-57.8064
1869	-58.1877	-58.0923		-57.3758	-57.7669
1870	-58.3158	-58.0792		-57.3856	-57.8688
1871	-58.3619	-58.1055		-57.3462	-57.813
1872	-58.306	-58.1186		-57.3331	-57.7735
1873	-58.2928	-58.0956		-57.3265	-57.8524
1874	-58.26	-58.0693		-57.3758	-57.9346
1875	-58.2665	-58.0595		-57.3298	-57.9083
1876	-58.2468	-58.0989		-57.3363	-57.9148
1877	-58.3257	-58.0792		-57.241	-57.905
1878	-58.3257	-57.9641		-57.3002	-57.9247
1879	-58.3356	-58.1022		-57.2837	-57.9444
1880	-58.375	-58.0726		-57.3331	-57.9181
1881	-58.398	-57.9641		-57.3824	-57.928
1882	-58.4079	-58.0529		-57.3265	-57.8918
1883	-58.421	-57.9904		-57.2739	-57.9806
1884	-58.3684	-57.9477		-57.2542	-57.951
1885	-58.3717	-57.997		-57.2772	-57.9707
1886	-58.4736	-57.8918		-57.31	-57.9444
1887	-58.4868	-57.8688		-57.1818	-58.0299
1888	-58.4112	-57.7899		-57.2344	-57.9083
1889	-58.4999	-57.8425		-57.2837	-57.8557
1890	-58.4999	-57.8885		-57.2081	-57.8853
1891	-58.4999	-57.7439		-57.2279	-57.8754
1892	-58.5328	-57.7702		-57.241	-57.8787
1893	-58.4572	-57.7012		-57.287	-57.9313
1894	-58.4671	-57.7604		-57.3068	-58.0134
1895	-58.444	-57.6782		-57.241	-57.9609
1896	-58.5131	-57.6749		-57.3396	-57.9543
1897	-58.4572	-57.6815		-57.3199	-57.9609
1898	-58.4408	-57.6059		-57.3002	-57.9872
1899	-58.4671	-57.619		-57.264	-57.9872
1900	-58.4408	-57.5533		-57.2574	-57.9313
1901	-58.3947	-57.4908		-57.3133	-57.9181
1902	-58.3882	-57.5073		-57.3462	-57.9214
1903	-58.444	-57.4908		-57.3035	-57.8984
1904	-58.4736	-57.4284		-57.2607	-57.9444
1905	-58.3553	-57.4054		-57.2542	-57.9116
1906	-58.3619	-57.4152		-57.2312	-57.9674
1907	-58.3816	-57.3265		-57.2476	-57.8853
1908	-58.4013	-57.3396		-57.241	-57.836
1909	-58.4243	-57.3626		-57.1523	-57.8097
1910	-58.375	-57.2706		-57.1424	-57.8688
1911	-58.3586	-57.2377		-57.2081	-57.8524
1912	-58.398	-57.1293		-57.2049	-57.7834
1913	-58.2961	-57.0931		-57.1194	-57.7078
1914	-58.3257	-57.1325		-57.2147	-57.7242
1915	-58.3684	-57.103		-57.1227	-57.7209
1916	-58.3882	-57.057		-57.3002	-57.8392
1917	-58.3191	-57.0405		-57.241	-57.7538
1918	-58.4112	-56.9518		-57.3166	-57.6979
1919	-58.3487	-57.0241		-57.2509	-57.6749
1920	-58.2994	-56.8827		-57.2969	-57.6683
1921	-58.3684	-56.8729		-57.2739	-57.6223
1922	-58.2238	-56.8433		-57.3758	-57.6354
1923	-58.2534	-56.7085		-57.3856	-57.6157
1924	-58.2863	-56.6592		-57.4349	-57.5368
1925	-58.2797	-56.6001		-57.4382	-57.5631
1926	-58.2337	-56.6066		-57.4185	-57.4317
1927	-58.2863	-56.6329		-57.4382	-57.31
1928	-58.2797	-56.6231		-57.4251	-57.3791
1929	-58.2238	-56.6362		-57.4941	-57.3593
1930	-58.1449	-56.6231		-57.4678	-57.2607
1931	-58.2205	-56.6165		-57.5434	-57.2607
1932	-58.1647	-56.6264		-57.4941	-57.2837
1933	-58.1712	-56.554		-57.5171	-57.2312
1934	-58.2271	-56.485		-57.5204	-57.172
1935	-58.1482	-56.5639		-57.5533	-57.1457
1936	-58.1778	-56.4916		-57.3988	-57.0602
1937	-58.1745	-56.508		-57.4152	-57.0471
1938	-58.1153	-56.4423		-57.4218	-56.9715
1939	-58.0858	-56.4554		-57.31	-57.0865
1940	-58.1121	-56.3996		-57.3035	-57.0767
1941	-57.9346	-56.3798		-57.3002	-56.9912
1942	-58.0365	-56.4258		-57.2837	-57.0504
1943	-57.9444	-56.4423		-57.3462	-57.0339
1944	-57.9609	-56.4653		-57.3692	-56.9222
1945	-57.9083	-56.3996		-57.3791	-56.9189
1946	-58.0003	-56.3831		-57.4514	-56.9518
1947	-57.9411	-56.5146		-57.4514	-56.9452
1948	-58.0693	-56.4258		-57.3495	-56.8794
1949	-58.0693	-56.4357		-57.4185	-56.8827
1950	-57.9576	-56.462		-57.3429	-56.7808
1951	-57.9214	-56.4226		-57.2739	-56.771
1952	-57.9444	-56.4587		-57.2706	-56.9123
1953	-57.7965	-56.3141		-57.1621	-56.8499
1954	-57.7834	-56.2878		-57.2114	-56.7348
1955	-57.6946	-56.2845		-57.2706	-56.8236
1956	-57.7242	-56.3272		-57.3561	-56.8006
1957	-57.7143	-56.324		-57.241	-56.7874
1958	-57.6913	-56.2221		-57.2739	-56.8334
1959	-57.6256	-56.3174		-57.3495	-56.8367
1960	-57.55	-56.37		-57.3396	-56.7743
1961	-57.573	-56.2944		-57.287	-56.7907
1962	-57.4678	-56.2977		-57.3068	-56.7973
1963	-57.4711	-56.2615		-57.2739	-56.6724
1964	-57.3593	-56.2516		-57.264	-56.7611
1965	-57.3265	-56.199		-57.2903	-56.6724
1966	-57.3561	-56.2812		-57.2049	-56.6362
1967	-57.3002	-56.3075		-57.3068	-56.577
1968	-57.3232	-56.3305		-57.3495	-56.6428
1969	-57.3265	-56.347		-57.3955	-56.6001
1970	-57.2016	-56.4127		-57.3593	-56.531
1971	-57.1851	-56.3733		-57.3528	-56.554
1972	-57.103	-56.4061		-57.4284	-56.5672
1973	-57.0701	-56.4587		-57.4152	-56.6559
1974	-56.9978	-56.4291		-57.4974	-56.554
1975	-56.9715	-56.4653		-57.481	-56.5179
1976	-56.9846	-56.4193		-57.4744	-56.4982
1977	-56.8762	-56.4521		-57.55	-56.5475
1978	-56.7545	-56.4028		-57.5467	-56.5179
1979	-56.7118	-56.4521		-57.4908	-56.6033
1980	-56.7743	-56.4883		-57.5105	-56.6099
1981	-56.6724	-56.554		-57.5105	-56.5277
1982	-56.5573	-56.5146		-57.5861	-56.4719
1983	-56.5508	-56.485		-57.596	-56.5277
1984	-56.5376	-56.5212		-57.711	-56.5179
1985	-56.5014	-56.462		-57.5763	-56.5508
1986	-56.4817	-56.5639		-57.6091	-56.531
1987	-56.416	-56.4719		-57.6585	-56.5245
1988	-56.485	-56.5113		-57.6124	-56.485
1989	-56.439	-56.5277		-57.7143	-56.5639
1990	-56.4193	-56.416		-57.7899	-56.5442
1991	-56.4127	-56.5113		-57.7505	-56.6033
1992	-56.3996	-56.5179		-57.7768	-56.554
1993	-56.3174	-56.5508		-57.7735	-56.6789
1994	-56.2779	-56.6001		-57.8392	-56.5409
1995	-56.2746	-56.5968		-57.8294	-56.5409
1996	-56.2352	-56.6296		-57.8327	-56.6033
1997	-56.2681	-56.5508		-57.9017	-56.5672
1998	-56.2155	-56.6132		-57.8951	-56.531
[truncated: 24,003 more rows]
