# Supplementary material for: Neural circuit mechanisms for transforming learned olfactory valences into wind-oriented movement
Source: eLife. 2023 Sep 18;12:e85756. doi: 10.7554/eLife.85756 (PMC10588983; doi:10.7554/eLife.85756)
Supplement: Figure 5—source data 2. [file elife-85756-fig5-data2.xlsx]

## Sheet: Sheet1
	OCT					MCH
Time (x10^-4) (sec)	Pre	SEM	Post	SEM		Pre	SEM	Post	SEM
1	0.508282	0.255951	-0.140244	0.211381		-0.10899	0.23893	-0.277889	0.315088
2	0.510001	0.256981	-0.14234	0.210626		-0.108345	0.238972	-0.276029	0.316478
3	0.511723	0.258031	-0.144464	0.209865		-0.10769	0.238999	-0.274185	0.317861
4	0.513446	0.259099	-0.146615	0.209098		-0.107026	0.239009	-0.272357	0.319235
5	0.51517	0.260184	-0.148793	0.208327		-0.106353	0.239003	-0.270545	0.3206
6	0.516896	0.261286	-0.150995	0.20755		-0.105672	0.238982	-0.268749	0.321957
7	0.518622	0.262405	-0.153221	0.206769		-0.104982	0.238945	-0.26697	0.323304
8	0.520348	0.263539	-0.15547	0.205983		-0.104284	0.238892	-0.265208	0.324641
9	0.522075	0.264688	-0.157739	0.205193		-0.103579	0.238824	-0.263463	0.325969
10	0.523803	0.265852	-0.160027	0.204399		-0.102866	0.23874	-0.261736	0.327287
11	0.52553	0.267029	-0.162333	0.203601		-0.102146	0.238641	-0.260026	0.328594
12	0.527257	0.26822	-0.164656	0.2028		-0.101419	0.238527	-0.258333	0.329891
13	0.528984	0.269422	-0.166993	0.201995		-0.100685	0.238398	-0.256658	0.331177
14	0.530711	0.270637	-0.169344	0.201187		-0.0999438	0.238255	-0.255001	0.332451
15	0.532437	0.271863	-0.171707	0.200377		-0.0991964	0.238097	-0.253362	0.333715
16	0.534163	0.273099	-0.17408	0.199564		-0.0984423	0.237925	-0.251741	0.334966
17	0.535888	0.274345	-0.176462	0.198748		-0.0976817	0.237739	-0.250137	0.336206
18	0.537613	0.2756	-0.178851	0.19793		-0.0969145	0.23754	-0.248552	0.337434
19	0.539336	0.276864	-0.181246	0.197111		-0.0961407	0.237327	-0.246985	0.33865
20	0.541059	0.278135	-0.183645	0.196289		-0.0953602	0.237102	-0.245436	0.339853
21	0.54278	0.279414	-0.186047	0.195466		-0.0945731	0.236864	-0.243905	0.341044
22	0.544501	0.280699	-0.18845	0.194642		-0.0937791	0.236615	-0.242392	0.342221
23	0.54622	0.28199	-0.190852	0.193817		-0.0929783	0.236353	-0.240898	0.343386
24	0.547937	0.283286	-0.193253	0.19299		-0.0921704	0.236081	-0.239422	0.344537
25	0.549652	0.284587	-0.195649	0.192163		-0.0913554	0.235798	-0.237965	0.345674
26	0.551365	0.285892	-0.19804	0.191336		-0.0905331	0.235504	-0.236526	0.346798
27	0.553076	0.287201	-0.200425	0.190508		-0.0897033	0.235201	-0.235106	0.347908
28	0.554783	0.288512	-0.202801	0.18968		-0.0888658	0.234889	-0.233705	0.349004
29	0.556487	0.289826	-0.205166	0.188852		-0.0880205	0.234569	-0.232322	0.350086
30	0.558188	0.291141	-0.207521	0.188025		-0.0871672	0.23424	-0.230958	0.351153
31	0.559883	0.292458	-0.209862	0.187198		-0.0863057	0.233904	-0.229612	0.352205
32	0.561574	0.293775	-0.212188	0.186371		-0.0854359	0.23356	-0.228286	0.353243
33	0.563259	0.295093	-0.214499	0.185546		-0.0845576	0.233211	-0.226978	0.354265
34	0.564938	0.296409	-0.216792	0.184721		-0.0836705	0.232856	-0.225689	0.355272
35	0.566611	0.297725	-0.219067	0.183898		-0.0827746	0.232496	-0.224419	0.356264
36	0.568275	0.299039	-0.221321	0.183075		-0.0818697	0.232131	-0.223168	0.35724
37	0.569931	0.300352	-0.223554	0.182255		-0.0809555	0.231763	-0.221937	0.3582
38	0.571577	0.301661	-0.225763	0.181436		-0.0800318	0.231392	-0.220724	0.359143
39	0.573214	0.302967	-0.227949	0.180619		-0.0790985	0.231018	-0.219531	0.36007
40	0.574839	0.30427	-0.23011	0.179803		-0.0781553	0.230643	-0.218357	0.360981
41	0.576452	0.305569	-0.232243	0.17899		-0.077202	0.230266	-0.217202	0.361874
42	0.578053	0.306863	-0.23435	0.17818		-0.0762384	0.229889	-0.216067	0.36275
43	0.579639	0.308151	-0.236427	0.177372		-0.0752643	0.229513	-0.214952	0.363609
44	0.58121	0.309435	-0.238474	0.176566		-0.0742795	0.229138	-0.213856	0.364449
45	0.582765	0.310712	-0.24049	0.175764		-0.0732838	0.228764	-0.21278	0.365272
46	0.584303	0.311983	-0.242474	0.174965		-0.0722771	0.228394	-0.211725	0.366076
47	0.585823	0.313247	-0.244426	0.174168		-0.0712591	0.228026	-0.21069	0.366861
48	0.587323	0.314503	-0.246344	0.173376		-0.0702298	0.227663	-0.209676	0.367627
49	0.588803	0.315752	-0.248227	0.172586		-0.0691888	0.227304	-0.208682	0.368374
50	0.590262	0.316992	-0.250076	0.171801		-0.0681361	0.226951	-0.207711	0.369101
51	0.591698	0.318225	-0.251888	0.17102		-0.0670715	0.226604	-0.20676	0.369809
52	0.59311	0.319448	-0.253665	0.170242		-0.0659947	0.226263	-0.205832	0.370496
53	0.594497	0.320661	-0.255404	0.169469		-0.0649057	0.225931	-0.204927	0.371163
54	0.595859	0.321865	-0.257106	0.168701		-0.0638043	0.225607	-0.204044	0.371809
55	0.597193	0.323059	-0.25877	0.167937		-0.0626903	0.225291	-0.203185	0.372434
56	0.5985	0.324242	-0.260396	0.167177		-0.0615636	0.224986	-0.20235	0.373037
57	0.599778	0.325413	-0.261983	0.166423		-0.0604242	0.22469	-0.201539	0.373619
58	0.601025	0.326574	-0.263532	0.165673		-0.0592721	0.224406	-0.200754	0.37418
59	0.602242	0.327722	-0.265042	0.164929		-0.0581071	0.224133	-0.199993	0.374718
60	0.603428	0.328857	-0.266514	0.164189		-0.0569292	0.223872	-0.199259	0.375234
61	0.60458	0.32998	-0.267946	0.163455		-0.0557386	0.223624	-0.198552	0.375727
62	0.605699	0.33109	-0.269339	0.162726		-0.0545352	0.223389	-0.197871	0.376198
63	0.606784	0.332185	-0.270694	0.162003		-0.0533192	0.223168	-0.197218	0.376645
64	0.607834	0.333266	-0.272009	0.161285		-0.0520905	0.222961	-0.196594	0.37707
65	0.608848	0.334333	-0.273286	0.160573		-0.0508493	0.222768	-0.195998	0.377471
66	0.609826	0.335384	-0.274524	0.159867		-0.0495958	0.222591	-0.195431	0.377849
67	0.610766	0.336419	-0.275724	0.159166		-0.04833	0.222429	-0.194895	0.378203
68	0.61167	0.337439	-0.276885	0.158472		-0.0470521	0.222283	-0.194389	0.378534
69	0.612535	0.338441	-0.278009	0.157783		-0.0457623	0.222153	-0.193914	0.37884
70	0.613362	0.339427	-0.279094	0.157101		-0.0444608	0.22204	-0.193471	0.379123
71	0.614151	0.340396	-0.280143	0.156424		-0.0431478	0.221943	-0.193061	0.379382
72	0.614901	0.341346	-0.281154	0.155754		-0.0418235	0.221864	-0.192683	0.379617
73	0.615612	0.342279	-0.282129	0.155091		-0.040488	0.221802	-0.192338	0.379827
74	0.616284	0.343192	-0.283068	0.154433		-0.0391417	0.221758	-0.192028	0.380013
75	0.616918	0.344087	-0.283971	0.153782		-0.0377847	0.221731	-0.191752	0.380176
76	0.617512	0.344961	-0.284839	0.153138		-0.0364172	0.221722	-0.191512	0.380314
77	0.618068	0.345816	-0.285673	0.1525		-0.0350396	0.221732	-0.191307	0.380427
78	0.618586	0.34665	-0.286472	0.151868		-0.033652	0.221759	-0.191138	0.380517
79	0.619065	0.347464	-0.287239	0.151243		-0.0322546	0.221804	-0.191006	0.380582
80	0.619507	0.348256	-0.287973	0.150624		-0.0308478	0.221868	-0.190911	0.380624
81	0.619911	0.349027	-0.288675	0.150012		-0.0294318	0.22195	-0.190854	0.380641
82	0.620278	0.349776	-0.289345	0.149406		-0.0280069	0.22205	-0.190836	0.380635
83	0.620609	0.350502	-0.289986	0.148806		-0.0265733	0.222168	-0.190855	0.380606
84	0.620905	0.351206	-0.290597	0.148212		-0.0251313	0.222304	-0.190915	0.380552
85	0.621165	0.351887	-0.291179	0.147625		-0.0236812	0.222458	-0.191013	0.380476
86	0.621391	0.352544	-0.291733	0.147043		-0.0222231	0.222629	-0.191152	0.380376
87	0.621583	0.353177	-0.29226	0.146468		-0.0207574	0.222819	-0.191332	0.380254
88	0.621743	0.353786	-0.292761	0.145898		-0.0192844	0.223026	-0.191552	0.380109
89	0.62187	0.35437	-0.293237	0.145334		-0.0178042	0.22325	-0.191814	0.379942
90	0.621966	0.354929	-0.293689	0.144775		-0.0163173	0.223492	-0.192117	0.379753
91	0.622032	0.355463	-0.294117	0.144222		-0.0148238	0.22375	-0.192463	0.379542
92	0.622069	0.355972	-0.294523	0.143674		-0.0133242	0.224025	-0.19285	0.37931
93	0.622078	0.356454	-0.294906	0.143131		-0.0118186	0.224317	-0.193281	0.379056
94	0.622059	0.35691	-0.295269	0.142594		-0.0103075	0.224624	-0.193754	0.378782
95	0.622013	0.35734	-0.295612	0.142061		-0.0087911	0.224947	-0.19427	0.378487
96	0.621942	0.357742	-0.295936	0.141533		-0.00726991	0.225286	-0.194829	0.378171
97	0.621847	0.358118	-0.296242	0.14101		-0.00574425	0.225639	-0.195431	0.377836
98	0.621728	0.358467	-0.29653	0.140492		-0.00421451	0.226007	-0.196077	0.377481
99	0.621587	0.358788	-0.296802	0.139977		-0.00268108	0.226389	-0.196765	0.377107
100	0.621423	0.359082	-0.297057	0.139468		-0.00114439	0.226785	-0.197496	0.376714
101	0.621239	0.359349	-0.297298	0.138962		0.000395149	0.227194	-0.198271	0.376302
102	0.621035	0.359588	-0.297524	0.138461		0.0019371	0.227617	-0.199088	0.375872
103	0.620812	0.3598	-0.297737	0.137964		0.00348102	0.228051	-0.199948	0.375424
104	0.62057	0.359984	-0.297938	0.137471		0.00502645	0.228497	-0.20085	0.374959
105	0.62031	0.360141	-0.298126	0.136982		0.00657293	0.228955	-0.201795	0.374477
106	0.620034	0.360272	-0.298303	0.136497		0.00811996	0.229424	-0.202782	0.373978
107	0.619741	0.360375	-0.29847	0.136015		0.00966703	0.229903	-0.20381	0.373463
108	0.619433	0.360452	-0.298627	0.135538		0.0112136	0.230393	-0.204879	0.372932
109	0.61911	0.360502	-0.298774	0.135063		0.0127591	0.230891	-0.20599	0.372386
110	0.618773	0.360527	-0.298914	0.134592		0.014303	0.231399	-0.207141	0.371825
111	0.618422	0.360526	-0.299045	0.134124		0.0158446	0.231916	-0.208332	0.37125
112	0.618059	0.3605	-0.29917	0.133659		0.0173834	0.23244	-0.209564	0.370661
113	0.617682	0.36045	-0.299288	0.133198		0.0189187	0.232973	-0.210834	0.370059
114	0.617294	0.360375	-0.299401	0.132739		0.0204499	0.233512	-0.212143	0.369444
115	0.616895	0.360277	-0.299509	0.132283		0.0219763	0.234058	-0.21349	0.368817
116	0.616486	0.360156	-0.299613	0.131829		0.0234972	0.23461	-0.214875	0.368178
117	0.616066	0.360012	-0.299713	0.131378		0.025012	0.235168	-0.216297	0.367528
118	0.615637	0.359846	-0.299811	0.13093		0.02652	0.235731	-0.217755	0.366868
119	0.615199	0.359659	-0.299907	0.130483		0.0280204	0.236298	-0.219249	0.366197
120	0.614753	0.359452	-0.300002	0.130039		0.0295126	0.23687	-0.220777	0.365517
121	0.614299	0.359225	-0.300097	0.129597		0.030996	0.237446	-0.22234	0.364828
122	0.613839	0.358979	-0.300192	0.129157		0.0324699	0.238024	-0.223936	0.36413
123	0.613371	0.358715	-0.300288	0.128719		0.0339335	0.238606	-0.225565	0.363425
124	0.612898	0.358433	-0.300386	0.128282		0.0353864	0.239189	-0.227226	0.362712
125	0.612419	0.358134	-0.300487	0.127847		0.0368277	0.239775	-0.228918	0.361992
126	0.611935	0.35782	-0.300592	0.127414		0.0382571	0.240361	-0.23064	0.361266
127	0.611446	0.357492	-0.3007	0.126982		0.0396738	0.240949	-0.232392	0.360534
128	0.610954	0.357149	-0.300814	0.126552		0.0410774	0.241536	-0.234172	0.359797
129	0.610458	0.356794	-0.300934	0.126123		0.0424673	0.242123	-0.23598	0.359056
130	0.609959	0.356426	-0.301061	0.125695		0.0438429	0.24271	-0.237816	0.35831
131	0.609457	0.356048	-0.301196	0.125268		0.0452039	0.243296	-0.239678	0.357561
132	0.608954	0.35566	-0.301339	0.124842		0.0465496	0.243879	-0.241565	0.356808
133	0.608449	0.355263	-0.301491	0.124418		0.0478797	0.244461	-0.243477	0.356053
134	0.607943	0.354858	-0.301654	0.123994		0.0491936	0.24504	-0.245413	0.355295
135	0.607436	0.354447	-0.301828	0.123571		0.050491	0.245616	-0.247372	0.354536
136	0.606928	0.35403	-0.302014	0.12315		0.0517713	0.246188	-0.249353	0.353776
137	0.606421	0.353608	-0.302213	0.12273		0.0530342	0.246757	-0.251356	0.353015
138	0.605914	0.353183	-0.302425	0.12231		0.0542792	0.247321	-0.25338	0.352253
139	0.605408	0.352755	-0.302651	0.121892		0.0555059	0.24788	-0.255423	0.351492
140	0.604903	0.352326	-0.302892	0.121475		0.0567139	0.248433	-0.257485	0.350732
141	0.6044	0.351896	-0.30315	0.12106		0.0579028	0.248981	-0.259566	0.349972
142	0.603899	0.351467	-0.303423	0.120645		0.0590723	0.249523	-0.261665	0.349214
143	0.6034	0.35104	-0.303714	0.120233		0.060222	0.250059	-0.26378	0.348458
144	0.602904	0.350615	-0.304023	0.119822		0.0613515	0.250587	-0.265911	0.347704
145	0.602411	0.350194	-0.304351	0.119412		0.0624604	0.251109	-0.268057	0.346952
146	0.601922	0.349778	-0.304699	0.119005		0.0635485	0.251623	-0.270218	0.346204
147	0.601436	0.349367	-0.305066	0.118599		0.0646153	0.25213	-0.272392	0.345458
148	0.600955	0.348962	-0.305454	0.118196		0.0656606	0.252628	-0.274579	0.344716
149	0.600478	0.348565	-0.305864	0.117794		0.0666841	0.253119	-0.276778	0.343979
150	0.600006	0.348177	-0.306296	0.117395		0.0676856	0.2536	-0.278989	0.343245
151	0.59954	0.347797	-0.30675	0.116998		0.0686648	0.254073	-0.28121	0.342516
152	0.599079	0.347427	-0.307227	0.116604		0.0696216	0.254537	-0.283441	0.341792
153	0.598625	0.347068	-0.307728	0.116212		0.0705558	0.254991	-0.285681	0.341074
154	0.598176	0.346721	-0.308253	0.115823		0.0714674	0.255436	-0.287929	0.34036
155	0.597735	0.346386	-0.308803	0.115436		0.0723563	0.255872	-0.290185	0.339653
156	0.597301	0.346064	-0.309377	0.115053		0.0732225	0.256298	-0.292448	0.338951
157	0.596874	0.345755	-0.309977	0.114672		0.0740659	0.256713	-0.294717	0.338256
158	0.596456	0.345461	-0.310602	0.114295		0.0748867	0.257119	-0.296991	0.337567
159	0.596045	0.345181	-0.311252	0.113921		0.0756847	0.257515	-0.29927	0.336884
160	0.595643	0.344917	-0.311928	0.11355		0.0764603	0.2579	-0.301554	0.336209
161	0.595251	0.344669	-0.31263	0.113182		0.0772134	0.258275	-0.303841	0.33554
162	0.594867	0.344438	-0.313358	0.112819		0.0779443	0.25864	-0.306131	0.334878
163	0.594494	0.344223	-0.314112	0.112458		0.0786531	0.258995	-0.308423	0.334224
164	0.594131	0.344026	-0.314892	0.112102		0.0793401	0.259339	-0.310718	0.333576
165	0.593778	0.343846	-0.315698	0.111749		0.0800055	0.259673	-0.313015	0.332936
166	0.593437	0.343685	-0.31653	0.1114		0.0806496	0.259996	-0.315312	0.332303
167	0.593107	0.343542	-0.317387	0.111056		0.0812727	0.26031	-0.31761	0.331677
168	0.59279	0.343418	-0.31827	0.110715		0.0818752	0.260613	-0.319908	0.331059
169	0.592485	0.343313	-0.319178	0.110378		0.0824574	0.260906	-0.322206	0.330449
170	0.592194	0.343228	-0.32011	0.110046		0.0830197	0.26119	-0.324503	0.329845
171	0.591916	0.343162	-0.321068	0.109717		0.0835625	0.261464	-0.3268	0.32925
172	0.591652	0.343115	-0.32205	0.109394		0.0840863	0.261728	-0.329094	0.328661
173	0.591404	0.343089	-0.323055	0.109074		0.0845915	0.261983	-0.331387	0.32808
174	0.591171	0.343082	-0.324083	0.108759		0.0850787	0.26223	-0.333678	0.327506
175	0.590954	0.343095	-0.325134	0.108449		0.0855485	0.262467	-0.335966	0.32694
176	0.590753	0.343128	-0.326207	0.108143		0.0860013	0.262696	-0.338251	0.32638
177	0.59057	0.343182	-0.327301	0.107841		0.0864378	0.262916	-0.340532	0.325828
178	0.590405	0.343254	-0.328416	0.107545		0.0868586	0.263129	-0.34281	0.325282
179	0.590258	0.343347	-0.32955	0.107253		0.0872644	0.263334	-0.345083	0.324743
180	0.59013	0.343459	-0.330703	0.106966		0.0876556	0.263532	-0.347352	0.324211
181	0.590022	0.343591	-0.331873	0.106685		0.0880331	0.263722	-0.349616	0.323685
182	0.589934	0.343742	-0.33306	0.106408		0.0883974	0.263906	-0.351875	0.323165
183	0.589867	0.343912	-0.334262	0.106136		0.0887492	0.264084	-0.354129	0.322651
184	0.589821	0.344101	-0.335479	0.105869		0.0890891	0.264256	-0.356376	0.322143
185	0.589796	0.344308	-0.336709	0.105607		0.0894177	0.264422	-0.358618	0.32164
186	0.589794	0.344534	-0.337951	0.10535		0.0897356	0.264583	-0.360854	0.321142
187	0.589814	0.344778	-0.339204	0.105098		0.0900433	0.264739	-0.363082	0.320649
188	0.589857	0.345039	-0.340466	0.104851		0.0903415	0.264891	-0.365304	0.32016
189	0.589923	0.345317	-0.341737	0.10461		0.0906306	0.265038	-0.367519	0.319676
190	0.590012	0.345613	-0.343014	0.104373		0.0909113	0.265181	-0.369727	0.319196
191	0.590125	0.345925	-0.344297	0.10414		0.0911839	0.265321	-0.371927	0.318719
192	0.590261	0.346252	-0.345583	0.103913		0.091449	0.265458	-0.374119	0.318246
193	0.590421	0.346596	-0.346872	0.103689		0.091707	0.265592	-0.376304	0.317775
194	0.590604	0.346954	-0.348162	0.103471		0.0919585	0.265724	-0.37848	0.317306
195	0.590811	0.347327	-0.349451	0.103256		0.0922038	0.265854	-0.380648	0.31684
196	0.591041	0.347714	-0.350739	0.103045		0.0924435	0.265982	-0.382807	0.316375
197	0.591294	0.348114	-0.352024	0.102838		0.0926778	0.266109	-0.384958	0.315912
198	0.59157	0.348528	-0.353303	0.102634		0.0929073	0.266235	-0.3871	0.315449
199	0.591869	0.348953	-0.354576	0.102434		0.0931322	0.26636	-0.389233	0.314986
200	0.59219	0.349391	-0.355842	0.102236		0.093353	0.266484	-0.391357	0.314523
201	0.592533	0.34984	-0.357098	0.102041		0.0935699	0.266609	-0.393472	0.31406
202	0.592896	0.350299	-0.358342	0.101848		0.0937833	0.266733	-0.395578	0.313595
203	0.593281	0.350769	-0.359575	0.101657		0.0939935	0.266858	-0.397675	0.313128
204	0.593685	0.351248	-0.360793	0.101468		0.0942005	0.266984	-0.399762	0.31266
205	0.594108	0.351735	-0.361996	0.101281		0.0944048	0.267111	-0.401841	0.312188
206	0.594551	0.352232	-0.363182	0.101095		0.0946064	0.267238	-0.403909	0.311714
207	0.595011	0.352736	-0.36435	0.100909		0.0948056	0.267368	-0.405968	0.311236
208	0.595488	0.353247	-0.365497	0.100725		0.0950024	0.267498	-0.408018	0.310753
209	0.595981	0.353764	-0.366623	0.100541		0.095197	0.26763	-0.410058	0.310265
210	0.596489	0.354287	-0.367727	0.100357		0.0953895	0.267764	-0.412088	0.309773
211	0.597012	0.354816	-0.368806	0.100173		0.0955799	0.2679	-0.414108	0.309274
212	0.597548	0.355349	-0.369859	0.0999897		0.0957684	0.268038	-0.416118	0.308769
213	0.598097	0.355886	-0.370886	0.0998058		0.095955	0.268177	-0.418118	0.308257
214	0.598657	0.356426	-0.371885	0.0996215		0.0961397	0.268319	-0.420107	0.307738
215	0.599227	0.356969	-0.372854	0.0994366		0.0963227	0.268463	-0.422086	0.30721
216	0.599805	0.357514	-0.373793	0.0992512		0.096504	0.268609	-0.424054	0.306675
217	0.600392	0.35806	-0.3747	0.099065		0.0966836	0.268757	-0.426011	0.30613
218	0.600986	0.358608	-0.375574	0.098878		0.0968615	0.268907	-0.427956	0.305577
219	0.601585	0.359155	-0.376415	0.0986902		0.0970377	0.269059	-0.429891	0.305013
220	0.602189	0.359702	-0.37722	0.0985015		0.0972123	0.269213	-0.431813	0.304439
221	0.602795	0.360249	-0.377991	0.0983118		0.0973852	0.269368	-0.433723	0.303855
222	0.603404	0.360793	-0.378724	0.0981213		0.0975562	0.269525	-0.435621	0.30326
223	0.604014	0.361335	-0.37942	0.0979299		0.0977253	0.269683	-0.437506	0.302653
224	0.604624	0.361875	-0.380079	0.0977377		0.0978925	0.269842	-0.439379	0.302035
225	0.605232	0.362411	-0.380698	0.0975446		0.0980574	0.270002	-0.441238	0.301404
226	0.605838	0.362944	-0.381278	0.0973508		0.0982199	0.270162	-0.443083	0.300762
227	0.60644	0.363471	-0.381819	0.0971565		0.0983799	0.270322	-0.444915	0.300106
228	0.607037	0.363994	-0.382319	0.0969616		0.098537	0.270483	-0.446732	0.299438
229	0.607629	0.364511	-0.382778	0.0967665		0.0986911	0.270642	-0.448535	0.298756
230	0.608214	0.365022	-0.383196	0.0965712		0.0988419	0.270801	-0.450323	0.298061
231	0.608791	0.365525	-0.383573	0.0963761		0.0989892	0.270959	-0.452096	0.297352
232	0.60936	0.366022	-0.383909	0.0961813		0.0991326	0.271115	-0.453853	0.296629
233	0.609919	0.36651	-0.384203	0.0959872		0.0992719	0.271268	-0.455595	0.295892
234	0.610469	0.366991	-0.384455	0.095794		0.0994068	0.271419	-0.457321	0.29514
235	0.611007	0.367462	-0.384666	0.0956021		0.0995371	0.271568	-0.459032	0.294374
236	0.611534	0.367923	-0.384835	0.0954118		0.0996626	0.271712	-0.460726	0.293593
237	0.612049	0.368375	-0.384963	0.0952235		0.0997831	0.271853	-0.462405	0.292798
238	0.612551	0.368816	-0.38505	0.0950377		0.0998983	0.271989	-0.464067	0.291987
239	0.613039	0.369246	-0.385095	0.0948546		0.100008	0.272119	-0.465712	0.291162
240	0.613513	0.369665	-0.385101	0.0946748		0.100112	0.272245	-0.467342	0.290321
241	0.613974	0.370072	-0.385066	0.0944987		0.100211	0.272364	-0.468954	0.289466
242	0.614419	0.370467	-0.384992	0.0943267		0.100303	0.272476	-0.47055	0.288595
243	0.614849	0.370848	-0.384878	0.0941594		0.100389	0.272582	-0.472129	0.287708
244	0.615265	0.371217	-0.384727	0.0939973		0.100469	0.272679	-0.473692	0.286807
245	0.615664	0.371572	-0.384537	0.0938408		0.100543	0.272768	-0.475237	0.28589
246	0.616049	0.371912	-0.384311	0.0936905		0.10061	0.272849	-0.476766	0.284958
247	0.616417	0.372238	-0.384048	0.0935468		0.100671	0.27292	-0.478279	0.284011
248	0.616771	0.37255	-0.38375	0.0934103		0.100725	0.27298	-0.479774	0.283048
249	0.617108	0.372846	-0.383416	0.0932814		0.100772	0.27303	-0.481253	0.282071
250	0.617431	0.373126	-0.383049	0.0931608		0.100811	0.273069	-0.482715	0.281078
251	0.617738	0.373391	-0.382649	0.0930489		0.100844	0.273096	-0.484161	0.28007
252	0.618031	0.373639	-0.382216	0.0929461		0.100869	0.273111	-0.48559	0.279047
253	0.618309	0.37387	-0.381752	0.092853		0.100886	0.273113	-0.487004	0.27801
254	0.618574	0.374085	-0.381257	0.09277		0.100896	0.273102	-0.488401	0.276958
255	0.618825	0.374282	-0.380732	0.0926975		0.100897	0.273076	-0.489782	0.275892
256	0.619063	0.374462	-0.380179	0.0926361		0.10089	0.273037	-0.491148	0.274811
257	0.61929	0.374624	-0.379598	0.092586		0.100875	0.272982	-0.492498	0.273716
258	0.619505	0.374768	-0.37899	0.0925478		0.100851	0.272913	-0.493833	0.272608
259	0.619709	0.374893	-0.378356	0.0925217		0.100818	0.272827	-0.495154	0.271486
260	0.619904	0.375	-0.377697	0.0925082		0.100777	0.272726	-0.496459	0.27035
261	0.620089	0.375088	-0.377013	0.0925076		0.100726	0.272608	-0.49775	0.269202
262	0.620267	0.375157	-0.376307	0.0925201		0.100666	0.272474	-0.499027	0.268041
263	0.620437	0.375206	-0.375578	0.0925462		0.100596	0.272322	-0.500291	0.266867
264	0.620602	0.375236	-0.374828	0.0925861		0.100516	0.272153	-0.501541	0.265682
265	0.620761	0.375247	-0.374058	0.09264		0.100427	0.271966	-0.502778	0.264485
266	0.620917	0.375237	-0.373268	0.0927081		0.100328	0.271761	-0.504003	0.263277
267	0.621069	0.375208	-0.37246	0.0927907		0.100219	0.271538	-0.505216	0.262058
268	0.62122	0.375159	-0.371635	0.0928877		0.100099	0.271297	-0.506417	0.260829
269	0.62137	0.375089	-0.370794	0.0929995		0.0999681	0.271037	-0.507606	0.259589
270	0.62152	0.374999	-0.369937	0.093126		0.0998266	0.270757	-0.508784	0.258341
271	0.621672	0.374888	-0.369066	0.0932674		0.099674	0.270459	-0.509952	0.257083
272	0.621826	0.374757	-0.368182	0.0934236		0.0995099	0.270141	-0.51111	0.255817
273	0.621984	0.374606	-0.367287	0.0935946		0.0993342	0.269805	-0.512258	0.254543
274	0.622147	0.374433	-0.36638	0.0937805		0.0991465	0.269448	-0.513396	0.253262
275	0.622315	0.37424	-0.365463	0.0939813		0.0989466	0.269072	-0.514525	0.251973
276	0.62249	0.374027	-0.364538	0.0941968		0.0987343	0.268676	-0.515645	0.250679
277	0.622673	0.373792	-0.363605	0.094427		0.0985091	0.268261	-0.516757	0.249379
278	0.622864	0.373537	-0.362665	0.0946718		0.098271	0.267826	-0.51786	0.248073
279	0.623065	0.373261	-0.361719	0.0949311		0.0980195	0.267371	-0.518955	0.246763
280	0.623276	0.372964	-0.360768	0.0952047		0.0977543	0.266896	-0.520043	0.245449
281	0.623498	0.372647	-0.359813	0.0954925		0.0974753	0.266402	-0.521123	0.244132
282	0.623733	0.372309	-0.358856	0.0957943		0.0971821	0.265888	-0.522195	0.242812
283	0.62398	0.37195	-0.357898	0.0961098		0.0968743	0.265354	-0.52326	0.24149
284	0.624241	0.371571	-0.356938	0.0964389		0.0965516	0.264801	-0.524317	0.240166
285	0.624515	0.371172	-0.355979	0.0967812		0.0962138	0.264228	-0.525367	0.238841
286	0.624805	0.370752	-0.355022	0.0971365		0.0958603	0.263636	-0.52641	0.237516
287	0.62511	0.370312	-0.354067	0.0975046		0.095491	0.263025	-0.527446	0.236192
288	0.62543	0.369852	-0.353116	0.0978851		0.0951053	0.262394	-0.528474	0.234868
289	0.625767	0.369372	-0.352169	0.0982777		0.0947029	0.261744	-0.529495	0.233546
290	0.626122	0.368872	-0.351228	0.0986822		0.0942834	0.261076	-0.530509	0.232226
291	0.626493	0.368353	-0.350294	0.0990982		0.0938464	0.260389	-0.531514	0.23091
292	0.626883	0.367815	-0.349368	0.0995254		0.0933916	0.259683	-0.532512	0.229597
293	0.627291	0.367258	-0.34845	0.0999635		0.0929186	0.258959	-0.533502	0.228288
294	0.627717	0.366682	-0.347543	0.100412		0.0924268	0.258217	-0.534482	0.226984
295	0.628162	0.366087	-0.346646	0.100871		0.0919159	0.257457	-0.535455	0.225686
296	0.628627	0.365475	-0.345761	0.101339		0.0913855	0.25668	-0.536418	0.224394
297	0.629111	0.364845	-0.344889	0.101817		0.0908351	0.255885	-0.537371	0.223109
298	0.629614	0.364197	-0.344032	0.102304		0.0902645	0.255074	-0.538315	0.221832
299	0.630137	0.363532	-0.343189	0.102799		0.0896732	0.254246	-0.539248	0.220564
300	0.63068	0.362851	-0.342363	0.103303		0.0890609	0.253402	-0.54017	0.219305
301	0.631243	0.362153	-0.341554	0.103814		0.0884274	0.252542	-0.54108	0.218056
302	0.631825	0.36144	-0.340764	0.104332		0.0877723	0.251666	-0.541979	0.216817
303	0.632426	0.360711	-0.339993	0.104858		0.0870953	0.250776	-0.542866	0.21559
304	0.633047	0.359967	-0.339244	0.10539		0.0863963	0.249871	-0.54374	0.214375
305	0.633686	0.359209	-0.338516	0.105927		0.085675	0.248953	-0.5446	0.213172
306	0.634344	0.358437	-0.337812	0.106471		0.0849312	0.24802	-0.545446	0.211984
307	0.63502	0.357652	-0.337132	0.107019		0.0841648	0.247075	-0.546278	0.21081
308	0.635712	0.356853	-0.336477	0.107571		0.0833758	0.246116	-0.547095	0.20965
309	0.636422	0.356042	-0.335849	0.108128		0.082564	0.245146	-0.547895	0.208507
310	0.637148	0.355219	-0.335249	0.108688		0.0817293	0.244164	-0.54868	0.20738
311	0.637889	0.354384	-0.334677	0.109251		0.0808718	0.243171	-0.549446	0.20627
312	0.638644	0.353538	-0.334135	0.109817		0.0799915	0.242167	-0.550195	0.205178
313	0.639414	0.352681	-0.333624	0.110385		0.0790883	0.241154	-0.550926	0.204105
314	0.640197	0.351815	-0.333144	0.110954		0.0781622	0.24013	-0.551637	0.203052
315	0.640992	0.350938	-0.332698	0.111525		0.0772135	0.239098	-0.552328	0.202018
316	0.641798	0.350053	-0.332284	0.112096		0.0762422	0.238057	-0.552998	0.201005
317	0.642615	0.349158	-0.331906	0.112667		0.0752484	0.237008	-0.553647	0.200014
318	0.643441	0.348256	-0.331562	0.113238		0.0742322	0.235951	-0.554273	0.199045
319	0.644275	0.347345	-0.331254	0.113809		0.0731939	0.234887	-0.554877	0.198099
320	0.645117	0.346428	-0.330983	0.114378		0.0721335	0.233817	-0.555457	0.197176
321	0.645965	0.345504	-0.330749	0.114946		0.0710514	0.232741	-0.556012	0.196277
322	0.646818	0.344573	-0.330554	0.115511		0.0699477	0.231658	-0.556543	0.195403
323	0.647675	0.343636	-0.330396	0.116075		0.0688226	0.230571	-0.557048	0.194555
324	0.648535	0.342695	-0.330278	0.116636		0.0676763	0.229479	-0.557526	0.193732
325	0.649396	0.341748	-0.3302	0.117194		0.0665092	0.228383	-0.557978	0.192936
326	0.650258	0.340796	-0.330161	0.117748		0.0653215	0.227283	-0.558403	0.192167
327	0.651119	0.339841	-0.330162	0.118298		0.0641135	0.226179	-0.5588	0.191425
328	0.651977	0.338882	-0.330204	0.118845		0.0628856	0.225072	-0.559168	0.190711
329	0.652831	0.337919	-0.330287	0.119387		0.0616382	0.223963	-0.559508	0.190025
330	0.653681	0.336954	-0.33041	0.119924		0.0603717	0.222852	-0.559819	0.189368
331	0.654524	0.335986	-0.330574	0.120456		0.0590865	0.221738	-0.5601	0.18874
332	0.655359	0.335016	-0.330779	0.120983		0.0577832	0.220623	-0.560352	0.188142
333	0.656185	0.334045	-0.331025	0.121504		0.0564623	0.219507	-0.560573	0.187573
334	0.657	0.333071	-0.331311	0.122019		0.0551242	0.218391	-0.560764	0.187034
335	0.657804	0.332097	-0.331638	0.122529		0.0537697	0.217273	-0.560924	0.186526
336	0.658593	0.331122	-0.332005	0.123031		0.0523993	0.216156	-0.561053	0.186047
337	0.659367	0.330146	-0.332411	0.123527		0.0510135	0.215038	-0.561151	0.185599
338	0.660125	0.329171	-0.332857	0.124016		0.0496131	0.213921	-0.561219	0.185182
339	0.660865	0.328195	-0.333342	0.124498		0.0481988	0.212805	-0.561254	0.184796
340	0.661586	0.32722	-0.333866	0.124973		0.0467712	0.21169	-0.561259	0.18444
341	0.662287	0.326245	-0.334427	0.125441		0.045331	0.210576	-0.561232	0.184115
342	0.662965	0.325272	-0.335025	0.125901		0.043879	0.209464	-0.561174	0.183822
343	0.66362	0.3243	-0.335659	0.126353		0.0424161	0.208354	-0.561084	0.183559
344	0.664251	0.32333	-0.33633	0.126798		0.0409429	0.207246	-0.560963	0.183327
345	0.664856	0.322361	-0.337035	0.127235		0.0394603	0.206141	-0.56081	0.183125
346	0.665434	0.321394	-0.337774	0.127665		0.0379692	0.205039	-0.560626	0.182955
347	0.665984	0.32043	-0.338546	0.128087		0.0364706	0.20394	-0.560411	0.182815
348	0.666504	0.319469	-0.339349	0.128501		0.0349652	0.202844	-0.560165	0.182705
349	0.666993	0.31851	-0.340184	0.128908		0.0334541	0.201753	-0.559888	0.182627
350	0.66745	0.317554	-0.341049	0.129307		0.0319383	0.200666	-0.559581	0.182578
351	0.667874	0.316601	-0.341942	0.129699		0.0304188	0.199583	-0.559243	0.182559
352	0.668263	0.315652	-0.342863	0.130083		0.0288969	0.198506	-0.558875	0.182571
353	0.668617	0.314706	-0.343809	0.13046		0.0273737	0.197434	-0.558478	0.182612
354	0.668934	0.313764	-0.344781	0.130829		0.0258505	0.196367	-0.558051	0.182683
355	0.669213	0.312826	-0.345776	0.131192		0.0243286	0.195306	-0.557594	0.182782
356	0.669453	0.311892	-0.346794	0.131547		0.0228094	0.194252	-0.557109	0.182911
357	0.669653	0.310962	-0.347832	0.131895		0.0212943	0.193205	-0.556596	0.183069
358	0.669811	0.310036	-0.34889	0.132237		0.0197848	0.192165	-0.556054	0.183255
359	0.669928	0.309115	-0.349966	0.132572		0.0182823	0.191132	-0.555485	0.183469
360	0.670001	0.308198	-0.351058	0.1329		0.0167885	0.190108	-0.554888	0.183711
361	0.67003	0.307286	-0.352164	0.133223		0.0153048	0.189092	-0.554263	0.18398
362	0.670014	0.306379	-0.353285	0.133539		0.013833	0.188084	-0.553612	0.184277
363	0.669952	0.305476	-0.354416	0.133849		0.0123746	0.187086	-0.552935	0.1846
364	0.669844	0.304578	-0.355558	0.134153		0.0109312	0.186097	-0.552231	0.18495
365	0.669688	0.303685	-0.356708	0.134451		0.00950457	0.185118	-0.551502	0.185326
366	0.669484	0.302796	-0.357865	0.134744		0.00809631	0.18415	-0.550747	0.185727
367	0.669231	0.301913	-0.359027	0.135032		0.00670814	0.183192	-0.549967	0.186155
368	0.668929	0.301034	-0.360191	0.135315		0.00534176	0.182245	-0.549162	0.186607
369	0.668577	0.30016	-0.361357	0.135592		0.00399888	0.181309	-0.548332	0.187084
370	0.668174	0.299291	-0.362523	0.135865		0.00268121	0.180385	-0.547478	0.187585
371	0.66772	0.298426	-0.363686	0.136133		0.00139045	0.179473	-0.546599	0.188111
372	0.667215	0.297567	-0.364845	0.136396		0.000128265	0.178573	-0.545697	0.18866
373	0.666658	0.296711	-0.365998	0.136655		-0.00110368	0.177686	-0.544772	0.189232
374	0.666048	0.29586	-0.367143	0.13691		-0.00230376	0.176811	-0.543823	0.189827
375	0.665386	0.295014	-0.368278	0.137161		-0.00347038	0.17595	-0.542851	0.190445
376	0.66467	0.294172	-0.369402	0.137408		-0.00460198	0.175102	-0.541856	0.191085
377	0.663901	0.293333	-0.370512	0.137651		-0.00569706	0.174268	-0.540839	0.191746
378	0.663079	0.292499	-0.371607	0.13789		-0.00675414	0.173449	-0.539799	0.19243
379	0.662203	0.291669	-0.372685	0.138125		-0.00777178	0.172643	-0.538737	0.193134
380	0.661272	0.290842	-0.373745	0.138357		-0.00874861	0.171852	-0.537654	0.193858
381	0.660288	0.290019	-0.374783	0.138584		-0.00968328	0.171075	-0.536549	0.194603
382	0.659249	0.289199	-0.3758	0.138809		-0.0105745	0.170314	-0.535423	0.195368
383	0.658155	0.288382	-0.376792	0.13903		-0.011421	0.169568	-0.534275	0.196152
384	0.657007	0.287569	-0.377759	0.139247		-0.0122215	0.168837	-0.533107	0.196956
385	0.655804	0.286758	-0.378699	0.139461		-0.012975	0.168121	-0.531918	0.197778
386	0.654547	0.28595	-0.37961	0.139671		-0.0136802	0.167421	-0.530709	0.198619
387	0.653235	0.285144	-0.380492	0.139877		-0.0143361	0.166737	-0.52948	0.199478
388	0.651869	0.284341	-0.381341	0.14008		-0.0149416	0.166068	-0.528231	0.200354
389	0.650448	0.283539	-0.382158	0.140279		-0.0154957	0.165416	-0.526963	0.201248
390	0.648973	0.28274	-0.382941	0.140474		-0.0159976	0.164779	-0.525676	0.202159
391	0.647444	0.281942	-0.383689	0.140666		-0.0164462	0.164158	-0.524371	0.203086
392	0.645861	0.281145	-0.3844	0.140853		-0.0168407	0.163554	-0.523048	0.20403
393	0.644225	0.28035	-0.385073	0.141037		-0.0171803	0.162965	-0.521707	0.204989
394	0.642535	0.279555	-0.385708	0.141216		-0.0174642	0.162393	-0.520349	0.205963
395	0.640792	0.278761	-0.386303	0.141391		-0.0176916	0.161837	-0.518974	0.206953
396	0.638997	0.277968	-0.386858	0.141562		-0.0178617	0.161296	-0.517583	0.207957
397	0.637151	0.277174	-0.387371	0.141728		-0.0179739	0.160772	-0.516176	0.208975
398	0.635252	0.276381	-0.387842	0.14189		-0.0180276	0.160264	-0.514754	0.210007
399	0.633303	0.275587	-0.38827	0.142047		-0.018022	0.159772	-0.513317	0.211052
400	0.631303	0.274792	-0.388655	0.1422		-0.0179568	0.159295	-0.511866	0.212109
401	0.629254	0.273996	-0.388996	0.142348		-0.0178313	0.158835	-0.510401	0.21318
402	0.627156	0.273199	-0.389292	0.142491		-0.0176454	0.15839	-0.508924	0.214262
403	0.625009	0.2724	-0.389543	0.142629		-0.0173985	0.157961	-0.507434	0.215355
404	0.622815	0.271599	-0.389749	0.142763		-0.0170905	0.157547	-0.505932	0.216459
405	0.620574	0.270796	-0.389909	0.142891		-0.0167212	0.157148	-0.504418	0.217573
406	0.618287	0.269989	-0.390024	0.143015		-0.0162904	0.156765	-0.502895	0.218697
407	0.615954	0.26918	-0.390093	0.143134		-0.0157982	0.156396	-0.501361	0.219831
408	0.613578	0.268367	-0.390115	0.143248		-0.0152446	0.156042	-0.499818	0.220973
409	0.611158	0.267549	-0.390092	0.143357		-0.0146296	0.155703	-0.498267	0.222123
410	0.608695	0.266728	-0.390022	0.14346		-0.0139536	0.155378	-0.496709	0.223281
411	0.606192	0.265902	-0.389907	0.143559		-0.0132168	0.155067	-0.495143	0.224446
412	0.603648	0.265071	-0.389745	0.143653		-0.0124195	0.15477	-0.49357	0.225618
413	0.601065	0.264234	-0.389538	0.143742		-0.0115622	0.154486	-0.491992	0.226796
414	0.598444	0.263392	-0.389286	0.143826		-0.0106454	0.154216	-0.490409	0.227979
415	0.595786	0.262543	-0.388989	0.143906		-0.00966975	0.153959	-0.488821	0.229168
416	0.593092	0.261688	-0.388647	0.14398		-0.0086358	0.153715	-0.48723	0.230361
417	0.590364	0.260826	-0.388261	0.144049		-0.00754433	0.153484	-0.485635	0.231558
418	0.587603	0.259957	-0.387831	0.144114		-0.00639612	0.153265	-0.484038	0.232759
419	0.584809	0.25908	-0.387358	0.144174		-0.00519203	0.153059	-0.482439	0.233963
420	0.581986	0.258195	-0.386843	0.144229		-0.00393296	0.152864	-0.480839	0.235169
421	0.579133	0.257302	-0.386285	0.14428		-0.00261987	0.152681	-0.479238	0.236378
422	0.576253	0.2564	-0.385687	0.144326		-0.00125377	0.15251	-0.477637	0.237588
423	0.573346	0.255489	-0.385047	0.144368		0.000164285	0.152351	-0.476037	0.238799
424	0.570415	0.254569	-0.384368	0.144405		0.00163322	0.152203	-0.474438	0.240011
425	0.56746	0.253639	-0.383649	0.144438		0.00315191	0.152065	-0.472841	0.241224
426	0.564484	0.252699	-0.382893	0.144467		0.00471925	0.151939	-0.471247	0.242436
427	0.561487	0.251748	-0.382098	0.144491		0.00633406	0.151823	-0.469656	0.243648
428	0.558473	0.250786	-0.381267	0.144511		0.00799516	0.151718	-0.468068	0.244859
429	0.555441	0.249813	-0.380401	0.144527		0.00970137	0.151623	-0.466485	0.246068
430	0.552394	0.248829	-0.3795	0.14454		0.0114514	0.151538	-0.464906	0.247276
431	0.549334	0.247833	-0.378565	0.144548		0.0132441	0.151463	-0.463333	0.248482
432	0.546262	0.246825	-0.377597	0.144553		0.0150782	0.151398	-0.461766	0.249685
433	0.54318	0.245805	-0.376598	0.144554		0.0169523	0.151343	-0.460204	0.250885
434	0.540089	0.244773	-0.375568	0.144552		0.018865	0.151297	-0.45865	0.252082
435	0.536992	0.243727	-0.374509	0.144546		0.0208151	0.151261	-0.457103	0.253276
436	0.53389	0.242669	-0.373421	0.144537		0.0228011	0.151235	-0.455563	0.254466
437	0.530785	0.241598	-0.372307	0.144525		0.0248215	0.151217	-0.454031	0.255652
438	0.527678	0.240513	-0.371165	0.144511		0.026875	0.151209	-0.452507	0.256833
439	0.524572	0.239415	-0.369999	0.144493		0.0289599	0.15121	-0.450992	0.25801
440	0.521468	0.238303	-0.368808	0.144474		0.0310748	0.151219	-0.449486	0.259182
441	0.518368	0.237178	-0.367595	0.144451		0.0332181	0.151237	-0.447988	0.260349
442	0.515274	0.236039	-0.366359	0.144427		0.0353883	0.151264	-0.4465	0.261511
443	0.512187	0.234887	-0.365102	0.144401		0.0375839	0.1513	-0.445021	0.262668
444	0.50911	0.233721	-0.363825	0.144374		0.0398031	0.151344	-0.443551	0.263819
445	0.506044	0.232541	-0.36253	0.144346		0.0420446	0.151396	-0.44209	0.264964
446	0.502992	0.231348	-0.361216	0.144316		0.0443066	0.151457	-0.44064	0.266103
447	0.499954	0.230142	-0.359885	0.144286		0.0465876	0.151526	-0.439199	0.267237
448	0.496933	0.228922	-0.358538	0.144256		0.0488861	0.151603	-0.437767	0.268364
449	0.493931	0.227689	-0.357176	0.144225		0.0512006	0.151687	-0.436346	0.269485
450	0.490949	0.226444	-0.355801	0.144195		0.0535296	0.15178	-0.434934	0.2706
451	0.48799	0.225186	-0.354412	0.144166		0.0558716	0.15188	-0.433533	0.271709
452	0.485054	0.223915	-0.353011	0.144137		0.0582253	0.151988	-0.432141	0.272812
453	0.482145	0.222633	-0.3516	0.14411		0.0605893	0.152104	-0.430759	0.273908
454	0.479263	0.221339	-0.350178	0.144085		0.0629623	0.152227	-0.429387	0.274998
455	0.47641	0.220033	-0.348747	0.144062		0.065343	0.152357	-0.428025	0.276081
456	0.473589	0.218717	-0.347308	0.14404		0.0677303	0.152494	-0.426674	0.277159
457	0.4708	0.21739	-0.345862	0.144022		0.070123	0.152639	-0.425332	0.27823
458	0.468046	0.216053	-0.344409	0.144006		0.0725201	0.152791	-0.424001	0.279295
459	0.465329	0.214706	-0.342951	0.143993		0.0749205	0.152949	-0.422679	0.280353
460	0.462649	0.21335	-0.341489	0.143984		0.0773232	0.153114	-0.421367	0.281406
461	0.460009	0.211985	-0.340022	0.143978		0.0797273	0.153287	-0.420066	0.282453
462	0.457411	0.210613	-0.338553	0.143977		0.082132	0.153465	-0.418774	0.283493
463	0.454855	0.209233	-0.337081	0.143979		0.0845364	0.15365	-0.417492	0.284528
464	0.452344	0.207845	-0.335607	0.143986		0.0869397	0.153842	-0.41622	0.285557
465	0.449879	0.206452	-0.334132	0.143998		0.0893412	0.154039	-0.414957	0.286581
466	0.447461	0.205052	-0.332658	0.144014		0.0917402	0.154242	-0.413703	0.287599
467	0.445092	0.203648	-0.331183	0.144036		0.0941359	0.154452	-0.412459	0.288611
468	0.442774	0.202238	-0.329709	0.144063		0.0965276	0.154666	-0.411224	0.289617
469	0.440506	0.200825	-0.328237	0.144096		0.0989148	0.154887	-0.409998	0.290619
470	0.438292	0.199409	-0.326767	0.144134		0.101297	0.155112	-0.40878	0.291615
471	0.436131	0.19799	-0.3253	0.144178		0.103673	0.155342	-0.407571	0.292606
472	0.434025	0.19657	-0.323836	0.144228		0.106044	0.155577	-0.40637	0.293591
473	0.431975	0.195148	-0.322376	0.144284		0.108407	0.155817	-0.405178	0.294571
474	0.429982	0.193726	-0.32092	0.144347		0.110764	0.156061	-0.403993	0.295547
475	0.428047	0.192304	-0.319468	0.144415		0.113112	0.156309	-0.402816	0.296517
476	0.42617	0.190883	-0.318022	0.14449		0.115453	0.156561	-0.401646	0.297482
477	0.424353	0.189464	-0.316581	0.14457		0.117786	0.156817	-0.400484	0.298442
478	0.422595	0.188047	-0.315146	0.144657		0.12011	0.157076	-0.399328	0.299397
479	0.420898	0.186634	-0.313718	0.14475		0.122424	0.157338	-0.39818	0.300347
480	0.419263	0.185225	-0.312297	0.14485		0.124729	0.157603	-0.397037	0.301291
481	0.417688	0.18382	-0.310883	0.144955		0.127024	0.15787	-0.395901	0.302231
482	0.416176	0.182421	-0.309477	0.145066		0.129309	0.158141	-0.394771	0.303165
483	0.414725	0.181027	-0.308078	0.145183		0.131583	0.158413	-0.393646	0.304094
484	0.413337	0.179641	-0.306688	0.145306		0.133847	0.158687	-0.392527	0.305017
485	0.412011	0.178262	-0.305307	0.145434		0.136099	0.158964	-0.391413	0.305935
486	0.410747	0.176891	-0.303935	0.145567		0.13834	0.159241	-0.390304	0.306848
487	0.409546	0.175529	-0.302573	0.145705		0.140569	0.159521	-0.389199	0.307755
488	0.408407	0.174176	-0.30122	0.145849		0.142786	0.159802	-0.388099	0.308656
489	0.40733	0.172834	-0.299877	0.145997		0.144991	0.160084	-0.387002	0.309551
490	0.406315	0.171502	-0.298545	0.146149		0.147184	0.160367	-0.38591	0.31044
491	0.405361	0.170182	-0.297224	0.146306		0.149364	0.160652	-0.384821	0.311322
492	0.404468	0.168874	-0.295913	0.146466		0.151532	0.160938	-0.383735	0.312198
493	0.403635	0.167579	-0.294613	0.14663		0.153687	0.161224	-0.382651	0.313067
494	0.402862	0.166296	-0.293325	0.146798		0.15583	0.161512	-0.38157	0.31393
495	0.402148	0.165028	-0.292048	0.146968		0.157959	0.1618	-0.380492	0.314785
496	0.401493	0.163773	-0.290782	0.147142		0.160076	0.16209	-0.379416	0.315633
497	0.400896	0.162533	-0.289528	0.147318		0.162179	0.162381	-0.378341	0.316473
498	0.400355	0.161309	-0.288286	0.147496		0.16427	0.162673	-0.377268	0.317306
499	0.399871	0.1601	-0.287055	0.147676		0.166347	0.162966	-0.376196	0.31813
500	0.399442	0.158907	-0.285836	0.147857		0.168411	0.16326	-0.375126	0.318945
501	0.399067	0.15773	-0.284628	0.14804		0.170461	0.163555	-0.374057	0.319752
502	0.398745	0.15657	-0.283432	0.148224		0.172499	0.163852	-0.37299	0.32055
503	0.398476	0.155426	-0.282247	0.148409		0.174522	0.164151	-0.371923	0.321338
504	0.398258	0.1543	-0.281074	0.148593		0.176532	0.164451	-0.370857	0.322117
505	0.39809	0.153191	-0.279912	0.148778		0.178528	0.164753	-0.369793	0.322885
506	0.39797	0.152099	-0.278761	0.148963		0.18051	0.165057	-0.36873	0.323643
507	0.397899	0.151025	-0.277621	0.149147		0.182478	0.165363	-0.367668	0.32439
508	0.397874	0.149968	-0.276492	0.14933		0.184432	0.165671	-0.366607	0.325126
509	0.397895	0.148929	-0.275373	0.149512		0.186372	0.165982	-0.365548	0.32585
510	0.397959	0.147907	-0.274265	0.149693		0.188297	0.166296	-0.36449	0.326563
511	0.398067	0.146903	-0.273166	0.149872		0.190207	0.166612	-0.363434	0.327262
512	0.398216	0.145916	-0.272077	0.15005		0.192103	0.16693	-0.36238	0.327949
513	0.398405	0.144947	-0.270997	0.150225		0.193984	0.167252	-0.361327	0.328623
514	0.398634	0.143994	-0.269926	0.150398		0.195849	0.167577	-0.360276	0.329284
515	0.398901	0.143059	-0.268863	0.150569		0.1977	0.167905	-0.359227	0.32993
516	0.399205	0.142141	-0.267807	0.150737		0.199536	0.168237	-0.358181	0.330562
517	0.399544	0.14124	-0.266759	0.150902		0.201356	0.168572	-0.357137	0.33118
518	0.399918	0.140355	-0.265717	0.151064		0.203162	0.168911	-0.356095	0.331783
519	0.400325	0.139486	-0.264681	0.151223		0.204951	0.169253	-0.355057	0.33237
520	0.400764	0.138633	-0.26365	0.151378		0.206726	0.169599	-0.354021	0.332941
521	0.401235	0.137796	-0.262623	0.15153		0.208485	0.169949	-0.352989	0.333497
522	0.401736	0.136975	-0.2616	0.151678		0.210229	0.170303	-0.351961	0.334037
523	0.402266	0.136169	-0.26058	0.151822		0.211957	0.170661	-0.350937	0.33456
524	0.402824	0.135378	-0.259561	0.151963		0.21367	0.171023	-0.349917	0.335066
525	0.40341	0.134601	-0.258543	0.152099		0.215367	0.171389	-0.348901	0.335555
526	0.404021	0.133839	-0.257526	0.152231		0.217048	0.17176	-0.347891	0.336027
527	0.404657	0.133092	-0.256507	0.152359		0.218714	0.172135	-0.346885	0.336481
528	0.405317	0.132358	-0.255488	0.152483		0.220363	0.172514	-0.345886	0.336917
529	0.406001	0.131637	-0.254465	0.152603		0.221996	0.172899	-0.344892	0.337336
530	0.406706	0.13093	-0.253439	0.152718		0.223613	0.173288	-0.343904	0.337736
531	0.407433	0.130236	-0.252409	0.152829		0.225214	0.173682	-0.342923	0.338117
532	0.40818	0.129554	-0.251374	0.152936		0.226799	0.174082	-0.341949	0.33848
533	0.408946	0.128885	-0.250333	0.153039		0.228367	0.174486	-0.340982	0.338824
534	0.40973	0.128227	-0.249286	0.153137		0.229918	0.174896	-0.340022	0.339149
535	0.410533	0.127582	-0.24823	0.153231		0.231453	0.175312	-0.339071	0.339454
536	0.411352	0.126948	-0.247166	0.153321		0.232971	0.175733	-0.338127	0.339741
537	0.412186	0.126326	-0.246093	0.153406		0.234473	0.17616	-0.337192	0.340007
538	0.413036	0.125715	-0.245009	0.153488		0.235957	0.176593	-0.336266	0.340255
539	0.413901	0.125116	-0.243915	0.153565		0.237425	0.177033	-0.335348	0.340482
540	0.414778	0.124527	-0.242808	0.153639		0.238876	0.177479	-0.33444	0.340689
541	0.415669	0.12395	-0.241689	0.153708		0.24031	0.177931	-0.333541	0.340877
542	0.416571	0.123384	-0.240556	0.153773		0.241728	0.178391	-0.332651	0.341044
543	0.417485	0.122829	-0.239409	0.153835		0.243128	0.178857	-0.331772	0.341192
544	0.41841	0.122285	-0.238245	0.153893		0.244512	0.17933	-0.330902	0.34132
545	0.419345	0.121753	-0.237066	0.153946		0.245878	0.179811	-0.330043	0.341427
546	0.420289	0.121233	-0.235869	0.153996		0.247228	0.180299	-0.329195	0.341514
547	0.421242	0.120724	-0.234654	0.154042		0.248562	0.180795	-0.328357	0.341582
548	0.422204	0.120228	-0.233421	0.154085		0.249878	0.181299	-0.32753	0.341629
549	0.423174	0.119744	-0.232167	0.154123		0.251178	0.181811	-0.326713	0.341657
550	0.424152	0.119274	-0.230894	0.154158		0.252462	0.18233	-0.325908	0.341665
551	0.425136	0.118817	-0.229599	0.154188		0.253729	0.182858	-0.325115	0.341653
552	0.426127	0.118373	-0.228282	0.154215		0.254979	0.183394	-0.324332	0.341621
553	0.427125	0.117944	-0.226944	0.154237		0.256212	0.183938	-0.323562	0.341569
554	0.428128	0.11753	-0.225583	0.154255		0.25743	0.184491	-0.322803	0.341499
555	0.429136	0.117132	-0.224198	0.154269		0.25863	0.185053	-0.322056	0.341408
556	0.430149	0.116749	-0.22279	0.154279		0.259814	0.185622	-0.321322	0.341299
557	0.431167	0.116383	-0.221358	0.154284		0.260981	0.186201	-0.320599	0.34117
558	0.432189	0.116034	-0.219901	0.154284		0.262131	0.186788	-0.319889	0.341023
559	0.433213	0.115703	-0.21842	0.15428		0.263265	0.187383	-0.319192	0.340857
560	0.434241	0.115391	-0.216915	0.154271		0.264381	0.187987	-0.318508	0.340672
561	0.435271	0.115098	-0.215384	0.154257		0.26548	0.188599	-0.317838	0.340468
562	0.436303	0.114824	-0.213829	0.154238		0.266562	0.189219	-0.317181	0.340247
563	0.437336	0.114571	-0.212249	0.154214		0.267626	0.189847	-0.316539	0.340007
564	0.438369	0.114339	-0.210645	0.154185		0.268672	0.190484	-0.31591	0.339749
565	0.439403	0.114129	-0.209016	0.154151		0.2697	0.191127	-0.315297	0.339474
566	0.440435	0.113941	-0.207363	0.154111		0.27071	0.191779	-0.314699	0.339181
567	0.441466	0.113776	-0.205686	0.154066		0.271701	0.192437	-0.314117	0.338871
568	0.442496	0.113635	-0.203986	0.154016		0.272672	0.193103	-0.313552	0.338543
569	0.443522	0.113518	-0.202262	0.153961		0.273625	0.193775	-0.313004	0.338199
570	0.444546	0.113425	-0.200517	0.153899		0.274558	0.194454	-0.312473	0.337838
571	0.445565	0.113357	-0.198749	0.153833		0.27547	0.195138	-0.31196	0.337461
572	0.44658	0.113315	-0.196961	0.153761		0.276362	0.195828	-0.311466	0.337067
573	0.447589	0.113298	-0.195153	0.153683		0.277233	0.196524	-0.310991	0.336657
574	0.448592	0.113307	-0.193326	0.1536		0.278083	0.197224	-0.310537	0.336231
575	0.449589	0.113342	-0.19148	0.153511		0.27891	0.197928	-0.310103	0.33579
576	0.450579	0.113404	-0.189618	0.153417		0.279716	0.198637	-0.309691	0.335333
577	0.451561	0.113491	-0.187741	0.153317		0.280498	0.199349	-0.309301	0.334861
578	0.452534	0.113605	-0.185849	0.153212		0.281258	0.200064	-0.308934	0.334374
579	0.453498	0.113746	-0.183944	0.153102		0.281994	0.200781	-0.30859	0.333872
580	0.454452	0.113913	-0.182028	0.152986		0.282706	0.2015	-0.308271	0.333355
581	0.455396	0.114106	-0.180102	0.152865		0.283394	0.202221	-0.307977	0.332825
582	0.456329	0.114325	-0.178167	0.152738		0.284057	0.202943	-0.307708	0.33228
583	0.457251	0.114569	-0.176226	0.152607		0.284695	0.203665	-0.307467	0.331722
584	0.45816	0.114839	-0.17428	0.152471		0.285308	0.204387	-0.307252	0.331151
585	0.459056	0.115134	-0.172331	0.152329		0.285896	0.205109	-0.307065	0.330566
586	0.459939	0.115454	-0.17038	0.152184		0.286458	0.205829	-0.306906	0.329969
587	0.460809	0.115799	-0.168429	0.152033		0.286994	0.206547	-0.306777	0.329359
588	0.461664	0.116167	-0.16648	0.151878		0.287504	0.207263	-0.306678	0.328738
589	0.462505	0.116558	-0.164535	0.151719		0.287988	0.207976	-0.306608	0.328104
590	0.463331	0.116972	-0.162596	0.151555		0.288445	0.208685	-0.30657	0.32746
591	0.464142	0.117408	-0.160664	0.151387		0.288877	0.209391	-0.306563	0.326804
592	0.464938	0.117866	-0.158742	0.151215		0.289282	0.210092	-0.306588	0.326139
593	0.465718	0.118345	-0.156831	0.15104		0.289661	0.210787	-0.306645	0.325463
594	0.466481	0.118844	-0.154933	0.150861		0.290013	0.211478	-0.306735	0.324777
595	0.467228	0.119363	-0.15305	0.150678		0.290339	0.212162	-0.306859	0.324082
596	0.467959	0.119901	-0.151184	0.150492		0.29064	0.21284	-0.307016	0.323378
597	0.468673	0.120457	-0.149337	0.150303		0.290914	0.21351	-0.307207	0.322666
598	0.46937	0.12103	-0.147509	0.150112		0.291163	0.214173	-0.307432	0.321946
599	0.470049	0.121621	-0.145704	0.149917		0.291386	0.214829	-0.307692	0.321219
600	0.470711	0.122227	-0.143922	0.14972		0.291584	0.215476	-0.307987	0.320484
601	0.471356	0.122849	-0.142166	0.149521		0.291756	0.216114	-0.308317	0.319743
602	0.471982	0.123485	-0.140436	0.149319		0.291904	0.216743	-0.308682	0.318996
603	0.472591	0.124136	-0.138735	0.149116		0.292027	0.217364	-0.309082	0.318243
604	0.473182	0.1248	-0.137064	0.148911		0.292126	0.217974	-0.309517	0.317485
605	0.473755	0.125477	-0.135424	0.148704		0.2922	0.218575	-0.309988	0.316722
606	0.47431	0.126166	-0.133817	0.148497		0.292251	0.219165	-0.310494	0.315956
607	0.474846	0.126866	-0.132244	0.148288		0.292279	0.219745	-0.311035	0.315185
608	0.475364	0.127577	-0.130707	0.148079		0.292283	0.220314	-0.311611	0.314412
609	0.475863	0.128299	-0.129207	0.14787		0.292265	0.220873	-0.312222	0.313636
610	0.476344	0.12903	-0.127744	0.14766		0.292225	0.221421	-0.312867	0.312857
611	0.476807	0.129771	-0.126321	0.14745		0.292163	0.221957	-0.313546	0.312077
612	0.47725	0.130521	-0.124938	0.14724		0.29208	0.222483	-0.314259	0.311296
613	0.477675	0.131279	-0.123597	0.14703		0.291975	0.222997	-0.315005	0.310514
614	0.478081	0.132045	-0.122297	0.146821		0.291851	0.2235	-0.315783	0.309732
615	0.478469	0.132819	-0.121041	0.146613		0.291706	0.223991	-0.316593	0.30895
616	0.478837	0.1336	-0.119829	0.146406		0.291542	0.224471	-0.317435	0.308169
617	0.479186	0.134388	-0.118661	0.1462		0.291359	0.22494	-0.318308	0.307389
618	0.479515	0.135182	-0.117538	0.145995		0.291157	0.225398	-0.319211	0.306611
619	0.479825	0.135983	-0.116461	0.145792		0.290937	0.225844	-0.320144	0.305835
620	0.480115	0.136791	-0.11543	0.14559		0.2907	0.226278	-0.321106	0.305062
621	0.480386	0.137604	-0.114446	0.14539		0.290445	0.226702	-0.322095	0.304292
622	0.480636	0.138424	-0.113509	0.145192		0.290173	0.227114	-0.323111	0.303525
623	0.480865	0.139249	-0.112618	0.144995		0.289885	0.227515	-0.324154	0.302763
624	0.481074	0.14008	-0.111774	0.144801		0.289581	0.227905	-0.325222	0.302006
625	0.481262	0.140916	-0.110978	0.144609		0.289262	0.228285	-0.326314	0.301254
626	0.481429	0.141758	-0.110228	0.144419		0.288927	0.228653	-0.327429	0.300507
627	0.481574	0.142605	-0.109525	0.144231		0.288577	0.229012	-0.328566	0.299767
628	0.481698	0.143457	-0.108869	0.144045		0.288214	0.22936	-0.329724	0.299034
629	0.481799	0.144315	-0.10826	0.143862		0.287836	0.229698	-0.330901	0.298307
630	0.481879	0.145177	-0.107696	0.143681		0.287444	0.230026	-0.332097	0.297589
631	0.481935	0.146045	-0.107178	0.143501		0.287039	0.230345	-0.333311	0.296879
632	0.481969	0.146918	-0.106705	0.143324		0.286622	0.230654	-0.33454	0.296177
633	0.481979	0.147795	-0.106277	0.143149		0.286191	0.230954	-0.335784	0.295484
634	0.481966	0.148678	-0.105894	0.142976		0.285748	0.231246	-0.337042	0.294802
635	0.481928	0.149566	-0.105555	0.142806		0.285292	0.23153	-0.338313	0.294129
636	0.481866	0.150459	-0.105258	0.142637		0.284825	0.231805	-0.339595	0.293467
637	0.48178	0.151357	-0.105005	0.14247		0.284346	0.232073	-0.340886	0.292816
638	0.481667	0.15226	-0.104794	0.142304		0.283855	0.232333	-0.342187	0.292176
639	0.48153	0.153167	-0.104625	0.142141		0.283353	0.232586	-0.343495	0.291548
640	0.481365	0.15408	-0.104496	0.141979		0.282839	0.232832	-0.34481	0.290932
641	0.481174	0.154997	-0.104408	0.141819		0.282315	0.233072	-0.346131	0.29033
642	0.480956	0.155919	-0.104359	0.141661		0.281779	0.233305	-0.347455	0.28974
643	0.480709	0.156846	-0.10435	0.141504		0.281233	0.233533	-0.348783	0.289164
644	0.480434	0.157778	-0.104378	0.141348		0.280676	0.233755	-0.350112	0.288601
645	0.480131	0.158714	-0.104444	0.141194		0.280108	0.233972	-0.351442	0.288053
646	0.479797	0.159656	-0.104547	0.141041		0.27953	0.234183	-0.352772	0.28752
647	0.479434	0.160601	-0.104686	0.14089		0.278942	0.234391	-0.354101	0.287002
648	0.47904	0.161551	-0.104861	0.140739		0.278342	0.234593	-0.355427	0.286499
649	0.478615	0.162506	-0.105069	0.140589		0.277733	0.234792	-0.35675	0.286012
650	0.478159	0.163466	-0.105312	0.14044		0.277113	0.234988	-0.358069	0.285541
651	0.47767	0.164429	-0.105588	0.140292		0.276483	0.235179	-0.359382	0.285087
652	0.477149	0.165398	-0.105895	0.140144		0.275842	0.235368	-0.360689	0.28465
653	0.476594	0.16637	-0.106235	0.139997		0.275192	0.235554	-0.361989	0.284229
654	0.476005	0.167347	-0.106605	0.13985		0.274531	0.235737	-0.363281	0.283827
655	0.475382	0.168328	-0.107006	0.139703		0.27386	0.235918	-0.364564	0.283442
656	0.474724	0.169313	-0.107436	0.139557		0.273179	0.236097	-0.365838	0.283075
657	0.474031	0.170303	-0.107894	0.139411		0.272487	0.236275	-0.367101	0.282727
658	0.473302	0.171297	-0.10838	0.139264		0.271786	0.23645	-0.368353	0.282397
659	0.472535	0.172294	-0.108893	0.139118		0.271074	0.236624	-0.369593	0.282086
660	0.471732	0.173296	-0.109433	0.138971		0.270352	0.236798	-0.370821	0.281794
661	0.470891	0.174302	-0.109998	0.138823		0.269621	0.23697	-0.372035	0.281522
662	0.470012	0.175311	-0.110588	0.138676		0.268879	0.237141	-0.373236	0.281269
663	0.469094	0.176325	-0.111203	0.138527		0.268127	0.237312	-0.374422	0.281036
664	0.468137	0.177342	-0.111841	0.138378		0.267366	0.237483	-0.375593	0.280822
665	0.46714	0.178362	-0.112501	0.138227		0.266595	0.237653	-0.376748	0.280629
666	0.466102	0.179386	-0.113185	0.138076		0.265815	0.237824	-0.377887	0.280455
667	0.465023	0.180414	-0.113889	0.137923		0.265024	0.237994	-0.37901	0.280302
668	0.463902	0.181444	-0.114615	0.137769		0.264225	0.238165	-0.380116	0.280169
669	0.46274	0.182478	-0.115361	0.137614		0.263416	0.238336	-0.381205	0.280056
670	0.461534	0.183514	-0.116127	0.137456		0.262599	0.238508	-0.382276	0.279963
671	0.460286	0.184553	-0.116912	0.137297		0.261773	0.23868	-0.38333	0.279891
672	0.458993	0.185594	-0.117716	0.137136		0.260938	0.238854	-0.384365	0.279839
673	0.457657	0.186637	-0.118538	0.136972		0.260095	0.239028	-0.385382	0.279807
674	0.456275	0.187682	-0.119377	0.136806		0.259244	0.239203	-0.386381	0.279795
675	0.454849	0.188729	-0.120234	0.136638		0.258385	0.23938	-0.387361	0.279804
676	0.453377	0.189777	-0.121106	0.136467		0.257519	0.239558	-0.388322	0.279832
677	0.45186	0.190826	-0.121995	0.136292		0.256647	0.239738	-0.389263	0.27988
678	0.450297	0.191876	-0.122899	0.136115		0.255769	0.239919	-0.390186	0.279948
679	0.448687	0.192926	-0.123817	0.135934		0.254884	0.240101	-0.391089	0.280035
680	0.447031	0.193976	-0.12475	0.13575		0.253995	0.240285	-0.391973	0.280142
681	0.445329	0.195025	-0.125697	0.135562		0.253101	0.240471	-0.392837	0.280269
682	0.44358	0.196074	-0.126656	0.13537		0.252204	0.240659	-0.393681	0.280414
683	0.441784	0.197122	-0.127627	0.135173		0.251303	0.240849	-0.394506	0.280578
684	0.439943	0.198169	-0.128611	0.134972		0.2504	0.241041	-0.395311	0.280761
685	0.438055	0.199213	-0.129605	0.134766		0.249495	0.241234	-0.396096	0.280963
686	0.436121	0.200255	-0.130609	0.134554		0.24859	0.24143	-0.39686	0.281183
687	0.434141	0.201295	-0.131623	0.134338		0.247684	0.241628	-0.397604	0.281422
688	0.432115	0.202331	-0.132646	0.134115		0.24678	0.241828	-0.398328	0.281678
689	0.430045	0.203364	-0.133677	0.133886		0.245877	0.24203	-0.399031	0.281952
690	0.427929	0.204392	-0.134714	0.133651		0.244977	0.242234	-0.399713	0.282243
691	0.42577	0.205416	-0.135758	0.13341		0.244081	0.242441	-0.400373	0.282551
692	0.423566	0.206435	-0.136807	0.133161		0.24319	0.24265	-0.401013	0.282877
693	0.42132	0.207448	-0.137861	0.132905		0.242304	0.24286	-0.40163	0.283218
694	0.41903	0.208456	-0.138917	0.132642		0.241426	0.243073	-0.402226	0.283577
695	0.4167	0.209457	-0.139976	0.13237		0.240555	0.243288	-0.402799	0.283951
696	0.414328	0.210452	-0.141037	0.132091		0.239693	0.243505	-0.40335	0.284341
697	0.411916	0.21144	-0.142098	0.131803		0.238841	0.243724	-0.403879	0.284746
698	0.409464	0.21242	-0.143158	0.131507		0.238001	0.243945	-0.404384	0.285167
699	0.406974	0.213392	-0.144216	0.131201		0.237172	0.244168	-0.404866	0.285603
700	0.404447	0.214356	-0.145271	0.130887		0.236357	0.244392	-0.405325	0.286054
701	0.401883	0.215311	-0.146323	0.130563		0.235557	0.244618	-0.405761	0.286518
702	0.399284	0.216258	-0.147369	0.130229		0.234772	0.244845	-0.406173	0.286998
703	0.39665	0.217195	-0.148409	0.129885		0.234004	0.245073	-0.40656	0.287491
704	0.393983	0.218123	-0.149441	0.129531		0.233254	0.245302	-0.406924	0.287997
705	0.391284	0.219041	-0.150464	0.129167		0.232523	0.245532	-0.407264	0.288517
706	0.388554	0.21995	-0.151478	0.128792		0.231811	0.245763	-0.40758	0.28905
707	0.385794	0.220848	-0.15248	0.128407		0.231121	0.245993	-0.407871	0.289596
708	0.383005	0.221737	-0.15347	0.12801		0.230452	0.246224	-0.408137	0.290155
709	0.380189	0.222614	-0.154446	0.127603		0.229806	0.246455	-0.408379	0.290725
710	0.377347	0.223482	-0.155407	0.127184		0.229185	0.246685	-0.408597	0.291307
711	0.37448	0.224339	-0.156352	0.126754		0.228588	0.246914	-0.40879	0.291901
712	0.37159	0.225185	-0.157279	0.126312		0.228017	0.247142	-0.408958	0.292506
713	0.368677	0.22602	-0.158187	0.125859		0.227474	0.247368	-0.409101	0.293122
714	0.365744	0.226845	-0.159074	0.125393		0.226957	0.247593	-0.409219	0.293748
715	0.362791	0.22766	-0.15994	0.124916		0.22647	0.247815	-0.409313	0.294384
716	0.35982	0.228463	-0.160783	0.124426		0.226012	0.248035	-0.409382	0.29503
717	0.356833	0.229257	-0.161602	0.123925		0.225585	0.248252	-0.409426	0.295685
718	0.353831	0.23004	-0.162396	0.123411		0.225189	0.248465	-0.409446	0.296349
719	0.350816	0.230812	-0.163163	0.122884		0.224825	0.248674	-0.40944	0.297022
720	0.347789	0.231575	-0.163903	0.122346		0.224494	0.248879	-0.409411	0.297703
721	0.344751	0.232327	-0.164613	0.121794		0.224198	0.24908	-0.409357	0.298392
722	0.341705	0.23307	-0.165294	0.121231		0.223936	0.249274	-0.40928	0.299089
723	0.338651	0.233804	-0.165944	0.120654		0.22371	0.249464	-0.409178	0.299792
724	0.335592	0.234528	-0.166561	0.120066		0.22352	0.249647	-0.409053	0.300502
725	0.332528	0.235243	-0.167145	0.119464		0.223368	0.249823	-0.408904	0.301218
726	0.329462	0.235949	-0.167696	0.118851		0.223253	0.249992	-0.408733	0.30194
727	0.326395	0.236647	-0.168211	0.118225		0.223177	0.250153	-0.408539	0.302668
728	0.323328	0.237336	-0.16869	0.117586		0.22314	0.250305	-0.408323	0.3034
729	0.320263	0.238018	-0.169132	0.116935		0.223143	0.250449	-0.408085	0.304137
730	0.3172	0.238692	-0.169537	0.116272		0.223185	0.250584	-0.407826	0.304878
731	0.314143	0.239359	-0.169903	0.115597		0.223269	0.250708	-0.407546	0.305623
732	0.311092	0.240019	-0.170231	0.11491		0.223394	0.250822	-0.407245	0.306371
733	0.308047	0.240672	-0.170519	0.114211		0.22356	0.250925	-0.406925	0.307122
734	0.305012	0.241318	-0.170767	0.113501		0.223769	0.251017	-0.406585	0.307876
735	0.301987	0.241959	-0.170975	0.11278		0.224019	0.251096	-0.406227	0.308632
736	0.298974	0.242593	-0.171141	0.112047		0.224312	0.251163	-0.40585	0.30939
737	0.295973	0.243222	-0.171267	0.111304		0.224647	0.251217	-0.405456	0.310149
738	0.292987	0.243845	-0.171351	0.110551		0.225025	0.251257	-0.405045	0.310909
739	0.290016	0.244463	-0.171394	0.109788		0.225445	0.251283	-0.404618	0.31167
740	0.287062	0.245076	-0.171395	0.109016		0.225907	0.251295	-0.404175	0.312431
741	0.284127	0.245684	-0.171355	0.108235		0.226413	0.251292	-0.403717	0.313192
742	0.28121	0.246288	-0.171274	0.107445		0.22696	0.251274	-0.403245	0.313953
743	0.278315	0.246887	-0.171152	0.106648		0.22755	0.25124	-0.402759	0.314713
744	0.275441	0.247481	-0.170989	0.105843		0.228182	0.25119	-0.402261	0.315472
745	0.272591	0.248071	-0.170787	0.105032		0.228855	0.251123	-0.401751	0.316229
746	0.269765	0.248657	-0.170545	0.104215		0.229571	0.25104	-0.401229	0.316986
747	0.266964	0.249239	-0.170263	0.103392		0.230327	0.25094	-0.400697	0.31774
748	0.26419	0.249817	-0.169944	0.102565		0.231125	0.250822	-0.400155	0.318492
749	0.261444	0.25039	-0.169587	0.101734		0.231963	0.250687	-0.399604	0.319241
750	0.258726	0.25096	-0.169194	0.1009		0.232842	0.250533	-0.399044	0.319987
751	0.256038	0.251525	-0.168765	0.100064		0.23376	0.250361	-0.398477	0.320731
752	0.253381	0.252086	-0.168301	0.0992265		0.234719	0.250171	-0.397903	0.321471
753	0.250755	0.252643	-0.167804	0.0983884		0.235716	0.249963	-0.397323	0.322206
754	0.248162	0.253195	-0.167274	0.0975507		0.236753	0.249736	-0.396738	0.322938
755	0.245602	0.253743	-0.166714	0.0967143		0.237827	0.249489	-0.396149	0.323665
756	0.243076	0.254286	-0.166123	0.0958801		0.23894	0.249224	-0.395556	0.324388
757	0.240585	0.254824	-0.165504	0.0950491		0.24009	0.24894	-0.394961	0.325105
758	0.238131	0.255357	-0.164857	0.0942223		0.241277	0.248637	-0.394364	0.325817
759	0.235713	0.255885	-0.164185	0.0934007		0.2425	0.248315	-0.393767	0.326524
760	0.233332	0.256407	-0.163488	0.0925852		0.243759	0.247974	-0.39317	0.327224
761	0.23099	0.256923	-0.162769	0.091777		0.245054	0.247614	-0.392574	0.327918
762	0.228686	0.257434	-0.162029	0.0909771		0.246382	0.247235	-0.391981	0.328605
763	0.226422	0.257938	-0.16127	0.0901865		0.247745	0.246838	-0.391391	0.329286
764	0.224198	0.258436	-0.160493	0.0894063		0.24914	0.246422	-0.390805	0.329959
765	0.222015	0.258927	-0.159699	0.0886376		0.250568	0.245988	-0.390225	0.330625
766	0.219874	0.259411	-0.158892	0.0878815		0.252028	0.245536	-0.389651	0.331283
767	0.217775	0.259887	-0.158072	0.087139		0.253518	0.245066	-0.389084	0.331933
768	0.215718	0.260356	-0.157242	0.0864113		0.255039	0.244578	-0.388526	0.332575
769	0.213704	0.260816	-0.156403	0.0856994		0.256588	0.244074	-0.387977	0.333209
770	0.211734	0.261269	-0.155558	0.0850043		0.258166	0.243553	-0.387439	0.333834
771	0.209809	0.261712	-0.154708	0.0843272		0.259771	0.243015	-0.386913	0.33445
772	0.207928	0.262147	-0.153856	0.083669		0.261402	0.242462	-0.3864	0.335056
773	0.206092	0.262572	-0.153004	0.0830308		0.263058	0.241893	-0.385901	0.335654
774	0.204302	0.262988	-0.152153	0.0824136		0.264739	0.24131	-0.385416	0.336242
775	0.202558	0.263394	-0.151307	0.0818183		0.266443	0.240712	-0.384948	0.33682
776	0.20086	0.263789	-0.150467	0.081246		0.268169	0.2401	-0.384496	0.337389
777	0.19921	0.264175	-0.149635	0.0806974		0.269916	0.239475	-0.384063	0.337948
778	0.197607	0.264549	-0.148814	0.0801736		0.271682	0.238837	-0.383648	0.338497
779	0.196053	0.264913	-0.148005	0.0796754		0.273468	0.238188	-0.383253	0.339036
780	0.194547	0.265265	-0.147211	0.0792035		0.275271	0.237527	-0.382878	0.339565
781	0.193091	0.265606	-0.146435	0.0787589		0.277091	0.236856	-0.382526	0.340085
782	0.191684	0.265936	-0.145677	0.0783422		0.278926	0.236175	-0.382195	0.340594
783	0.190327	0.266254	-0.14494	0.0779542		0.280774	0.235485	-0.381888	0.341094
784	0.189021	0.26656	-0.144226	0.0775955		0.282636	0.234787	-0.381605	0.341584
785	0.187766	0.266854	-0.143537	0.0772668		0.284509	0.234082	-0.381347	0.342064
786	0.186562	0.267135	-0.142874	0.0769685		0.286393	0.233371	-0.381115	0.342534
787	0.18541	0.267405	-0.14224	0.0767013		0.288286	0.232654	-0.380908	0.342995
788	0.184311	0.267662	-0.141636	0.0764655		0.290188	0.231932	-0.380729	0.343446
789	0.183265	0.267907	-0.141063	0.0762617		0.292096	0.231207	-0.380576	0.343889
790	0.182272	0.268139	-0.140524	0.0760901		0.294009	0.230479	-0.380452	0.344321
791	0.181332	0.268359	-0.140019	0.0759511		0.295928	0.229749	-0.380357	0.344745
792	0.180446	0.268566	-0.139551	0.0758448		0.297849	0.229019	-0.38029	0.345159
793	0.179614	0.268761	-0.13912	0.0757715		0.299773	0.228288	-0.380253	0.345565
794	0.178836	0.268943	-0.138727	0.0757312		0.301697	0.227559	-0.380246	0.345961
795	0.178113	0.269113	-0.138374	0.075724		0.303622	0.226831	-0.380268	0.346349
796	0.177445	0.269271	-0.138062	0.0757499		0.305544	0.226107	-0.380321	0.346728
797	0.176832	0.269416	-0.137792	0.0758086		0.307465	0.225387	-0.380405	0.347098
798	0.176274	0.269549	-0.137564	0.0759002		0.309381	0.224672	-0.38052	0.34746
799	0.175771	0.26967	-0.137379	0.0760242		0.311293	0.223963	-0.380666	0.347813
800	0.175322	0.269779	-0.137238	0.0761805		0.313199	0.22326	-0.380843	0.348158
801	0.174929	0.269876	-0.137141	0.0763686		0.315097	0.222566	-0.381052	0.348495
802	0.174591	0.269962	-0.13709	0.0765882		0.316987	0.221881	-0.381292	0.348823
803	0.174308	0.270036	-0.137083	0.0768388		0.318868	0.221205	-0.381563	0.349143
804	0.17408	0.2701	-0.137122	0.0771198		0.320738	0.22054	-0.381866	0.349455
805	0.173906	0.270152	-0.137207	0.0774307		0.322597	0.219887	-0.3822	0.349759
806	0.173786	0.270193	-0.137338	0.0777708		0.324443	0.219247	-0.382566	0.350055
807	0.173721	0.270224	-0.137516	0.0781395		0.326276	0.21862	-0.382963	0.350343
808	0.173709	0.270244	-0.137739	0.078536		0.328094	0.218008	-0.383391	0.350622
809	0.17375	0.270254	-0.138009	0.0789597		0.329896	0.217411	-0.38385	0.350894
810	0.173844	0.270255	-0.138325	0.0794098		0.331682	0.21683	-0.384341	0.351158
811	0.17399	0.270246	-0.138687	0.0798853		0.33345	0.216267	-0.384862	0.351414
812	0.174189	0.270228	-0.139095	0.0803856		0.3352	0.215722	-0.385414	0.351662
813	0.174439	0.270201	-0.139548	0.0809096		0.336931	0.215196	-0.385997	0.351903
814	0.174739	0.270165	-0.140046	0.0814566		0.338642	0.21469	-0.38661	0.352135
815	0.175091	0.270121	-0.140589	0.0820256		0.340332	0.214205	-0.387253	0.352359
816	0.175491	0.270069	-0.141176	0.0826156		0.342	0.213742	-0.387926	0.352575
817	0.175942	0.270009	-0.141807	0.0832256		0.343646	0.213301	-0.388628	0.352784
818	0.17644	0.269941	-0.142482	0.0838547		0.345269	0.212884	-0.38936	0.352984
819	0.176987	0.269866	-0.143199	0.0845019		0.346868	0.212491	-0.390121	0.353176
820	0.17758	0.269783	-0.143959	0.085166		0.348442	0.212123	-0.39091	0.353361
821	0.17822	0.269694	-0.14476	0.0858462		0.349992	0.21178	-0.391728	0.353537
822	0.178906	0.269599	-0.145602	0.0865414		0.351515	0.211464	-0.392573	0.353705
823	0.179636	0.269496	-0.146485	0.0872504		0.353012	0.211174	-0.393446	0.353865
824	0.180411	0.269388	-0.147408	0.0879724		0.354483	0.210913	-0.394346	0.354016
825	0.181228	0.269274	-0.14837	0.0887063		0.355925	0.210679	-0.395273	0.35416
826	0.182087	0.269153	-0.149371	0.0894511		0.35734	0.210475	-0.396226	0.354295
827	0.182988	0.269027	-0.150409	0.0902057		0.358727	0.2103	-0.397205	0.354423
828	0.183929	0.268896	-0.151485	0.0909691		0.360085	0.210154	-0.398209	0.354542
829	0.184909	0.268759	-0.152597	0.0917403		0.361413	0.210039	-0.399238	0.354653
830	0.185927	0.268617	-0.153746	0.0925184		0.362712	0.209954	-0.400292	0.354756
831	0.186982	0.268471	-0.154929	0.0933023		0.363981	0.2099	-0.40137	0.354851
832	0.188073	0.268319	-0.156148	0.0940911		0.36522	0.209878	-0.402472	0.354938
833	0.189199	0.268162	-0.1574	0.0948838		0.366429	0.209887	-0.403596	0.355018
834	0.190358	0.268	-0.158686	0.0956795		0.367606	0.209927	-0.404744	0.355089
835	0.19155	0.267834	-0.160005	0.0964771		0.368753	0.21	-0.405913	0.355153
836	0.192773	0.267663	-0.161357	0.0972759		0.369869	0.210104	-0.407104	0.355209
837	0.194026	0.267488	-0.16274	0.0980748		0.370954	0.21024	-0.408315	0.355258
838	0.195309	0.267308	-0.164155	0.098873		0.372007	0.210409	-0.409547	0.355299
839	0.196619	0.267123	-0.1656	0.0996696		0.373028	0.210609	-0.410799	0.355333
840	0.197955	0.266934	-0.167076	0.100464		0.374019	0.210841	-0.41207	0.355359
841	0.199317	0.26674	-0.168582	0.101255		0.374977	0.211105	-0.41336	0.355379
842	0.200703	0.266542	-0.170118	0.102041		0.375904	0.2114	-0.414668	0.355391
843	0.202112	0.266339	-0.171682	0.102823		0.3768	0.211727	-0.415993	0.355396
844	0.203543	0.266131	-0.173276	0.1036		0.377664	0.212084	-0.417334	0.355395
845	0.204994	0.26592	-0.174897	0.104369		0.378497	0.212473	-0.418692	0.355387
846	0.206466	0.265703	-0.176546	0.105132		0.379298	0.212891	-0.420065	0.355372
847	0.207956	0.265482	-0.178222	0.105887		0.380069	0.213339	-0.421453	0.355351
848	0.209464	0.265257	-0.179925	0.106634		0.380809	0.213817	-0.422854	0.355323
849	0.210988	0.265027	-0.181654	0.107372		0.381518	0.214323	-0.424269	0.35529
850	0.212528	0.264793	-0.183409	0.1081		0.382198	0.214857	-0.425697	0.35525
851	0.214083	0.264555	-0.185188	0.108818		0.382848	0.215419	-0.427137	0.355204
852	0.215652	0.264312	-0.186992	0.109525		0.383469	0.216008	-0.428588	0.355152
853	0.217234	0.264065	-0.188819	0.110222		0.38406	0.216623	-0.430049	0.355095
854	0.218828	0.263813	-0.19067	0.110906		0.384624	0.217263	-0.43152	0.355032
855	0.220433	0.263558	-0.192542	0.111579		0.385159	0.217929	-0.433	0.354964
856	0.22205	0.263299	-0.194436	0.11224		0.385667	0.218618	-0.434489	0.35489
857	0.223676	0.263035	-0.196351	0.112888		0.386149	0.21933	-0.435986	0.354811
858	0.225311	0.262768	-0.198285	0.113523		0.386604	0.220065	-0.43749	0.354727
859	0.226956	0.262497	-0.200239	0.114146		0.387033	0.220821	-0.439001	0.354638
860	0.228608	0.262223	-0.20221	0.114754		0.387438	0.221597	-0.440517	0.354543
861	0.230267	0.261945	-0.204198	0.11535		0.387818	0.222394	-0.442038	0.354444
862	0.231934	0.261664	-0.206203	0.115931		0.388174	0.22321	-0.443564	0.354339
863	0.233607	0.261379	-0.208223	0.116499		0.388507	0.224043	-0.445094	0.354229
864	0.235286	0.261092	-0.210257	0.117053		0.388818	0.224894	-0.446626	0.354114
865	0.236971	0.260802	-0.212305	0.117593		0.389108	0.225762	-0.44816	0.353995
866	0.238661	0.26051	-0.214364	0.118118		0.389376	0.226644	-0.449696	0.35387
867	0.240356	0.260215	-0.216435	0.11863		0.389624	0.227542	-0.451232	0.35374
868	0.242055	0.259919	-0.218515	0.119127		0.389852	0.228453	-0.452768	0.353605
869	0.243759	0.25962	-0.220605	0.11961		0.390061	0.229377	-0.454302	0.353465
870	0.245468	0.25932	-0.222702	0.120079		0.390252	0.230313	-0.455834	0.35332
871	0.24718	0.259019	-0.224805	0.120533		0.390425	0.23126	-0.457363	0.353169
872	0.248897	0.258717	-0.226915	0.120973		0.390581	0.232218	-0.458888	0.353014
873	0.250619	0.258413	-0.229028	0.121399		0.390721	0.233185	-0.460408	0.352853
874	0.252344	0.258109	-0.231144	0.121811		0.390845	0.234161	-0.461922	0.352686
875	0.254074	0.257805	-0.233262	0.122209		0.390955	0.235144	-0.463428	0.352514
876	0.255809	0.2575	-0.23538	0.122592		0.391049	0.236135	-0.464927	0.352337
877	0.257548	0.257196	-0.237497	0.122962		0.39113	0.237133	-0.466417	0.352154
878	0.259292	0.256891	-0.239612	0.123318		0.391198	0.238136	-0.467897	0.351965
879	0.261041	0.256587	-0.241724	0.123661		0.391254	0.239144	-0.469366	0.35177
880	0.262795	0.256284	-0.24383	0.12399		0.391297	0.240157	-0.470824	0.35157
881	0.264555	0.25598	-0.24593	0.124305		0.391329	0.241174	-0.472269	0.351363
882	0.26632	0.255678	-0.248022	0.124608		0.391351	0.242193	-0.473701	0.35115
883	0.268091	0.255376	-0.250105	0.124897		0.391362	0.243216	-0.475118	0.350931
884	0.269868	0.255075	-0.252177	0.125173		0.391365	0.24424	-0.47652	0.350706
885	0.271651	0.254774	-0.254237	0.125437		0.391359	0.245266	-0.477906	0.350474
886	0.273441	0.254475	-0.256283	0.125688		0.391345	0.246292	-0.479276	0.350235
887	0.275238	0.254176	-0.258313	0.125927		0.391323	0.247319	-0.480628	0.34999
888	0.277043	0.253878	-0.260326	0.126153		0.391295	0.248347	-0.481962	0.349739
889	0.278854	0.25358	-0.262319	0.126368		0.391262	0.249373	-0.483277	0.34948
890	0.280674	0.253283	-0.264293	0.12657		0.391223	0.250399	-0.484572	0.349214
891	0.282501	0.252987	-0.266243	0.126761		0.39118	0.251423	-0.485848	0.348942
892	0.284337	0.252692	-0.26817	0.12694		0.391133	0.252446	-0.487102	0.348663
893	0.286182	0.252397	-0.270071	0.127108		0.391083	0.253466	-0.488335	0.348376
894	0.288035	0.252103	-0.271945	0.127265		0.39103	0.254484	-0.489546	0.348082
895	0.289897	0.251808	-0.273791	0.127411		0.390976	0.255499	-0.490735	0.347781
896	0.291769	0.251514	-0.275606	0.127546		0.390921	0.256511	-0.491901	0.347473
897	0.29365	0.25122	-0.277389	0.12767		0.390866	0.257519	-0.493043	0.347157
898	0.295541	0.250926	-0.279139	0.127783		0.390811	0.258524	-0.494162	0.346835
899	0.297441	0.250631	-0.280854	0.127886		0.390757	0.259524	-0.495256	0.346504
900	0.299352	0.250336	-0.282534	0.127979		0.390705	0.26052	-0.496326	0.346166
901	0.301272	0.250041	-0.284176	0.128061		0.390655	0.261512	-0.497371	0.345821
902	0.303203	0.249744	-0.28578	0.128134		0.390608	0.262498	-0.498391	0.345468
903	0.305143	0.249447	-0.287345	0.128196		0.390565	0.263479	-0.499386	0.345108
904	0.307093	0.249147	-0.288869	0.12825		0.390525	0.264455	-0.500355	0.34474
905	0.309054	0.248847	-0.290352	0.128294		0.39049	0.265425	-0.501298	0.344364
906	0.311024	0.248544	-0.291792	0.128329		0.39046	0.266388	-0.502215	0.34398
907	0.313005	0.24824	-0.29319	0.128355		0.390436	0.267346	-0.503106	0.343589
908	0.314994	0.247933	-0.294543	0.128372		0.390419	0.268297	-0.503971	0.343189
909	0.316993	0.247623	-0.295852	0.128382		0.390408	0.269242	-0.50481	0.342782
910	0.319002	0.247311	-0.297117	0.128383		0.390404	0.270179	-0.505623	0.342367
911	0.321019	0.246995	-0.298336	0.128376		0.390408	0.27111	-0.50641	0.341944
912	0.323045	0.246676	-0.299509	0.128363		0.39042	0.272034	-0.50717	0.341513
913	0.325079	0.246353	-0.300637	0.128341		0.390442	0.27295	-0.507905	0.341073
914	0.32712	0.246026	-0.301718	0.128313		0.390472	0.273858	-0.508614	0.340626
915	0.329169	0.245695	-0.302753	0.128279		0.390512	0.274759	-0.509297	0.34017
916	0.331225	0.245359	-0.303742	0.128238		0.390563	0.275653	-0.509954	0.339706
917	0.333287	0.24502	-0.304685	0.128192		0.390624	0.276538	-0.510586	0.339233
918	0.335355	0.244675	-0.305581	0.12814		0.390697	0.277415	-0.511192	0.338753
919	0.337428	0.244325	-0.306431	0.128083		0.390781	0.278284	-0.511773	0.338264
920	0.339505	0.243971	-0.307234	0.128022		0.390877	0.279144	-0.512329	0.337767
921	0.341587	0.243612	-0.307992	0.127956		0.390987	0.279997	-0.512859	0.337262
922	0.343671	0.243247	-0.308704	0.127886		0.391109	0.28084	-0.513365	0.336748
923	0.345759	0.242877	-0.30937	0.127813		0.391245	0.281676	-0.513847	0.336226
924	0.347849	0.242502	-0.309991	0.127737		0.391395	0.282502	-0.514303	0.335696
925	0.34994	0.242122	-0.310568	0.127659		0.39156	0.28332	-0.514736	0.335157
926	0.352032	0.241737	-0.3111	0.127578		0.39174	0.284129	-0.515144	0.33461
927	0.354125	0.241346	-0.311589	0.127496		0.391935	0.284929	-0.515528	0.334055
928	0.356218	0.240951	-0.312034	0.127413		0.392145	0.28572	-0.515889	0.333492
929	0.358309	0.24055	-0.312437	0.127329		0.392371	0.286503	-0.516227	0.33292
930	0.3604	0.240145	-0.312798	0.127245		0.392614	0.287276	-0.516541	0.33234
931	0.362488	0.239734	-0.313117	0.127161		0.392873	0.288041	-0.516833	0.331751
932	0.364573	0.239319	-0.313395	0.127077		0.393148	0.288796	-0.517102	0.331154
933	0.366655	0.238899	-0.313634	0.126995		0.39344	0.289543	-0.517349	0.330548
934	0.368733	0.238475	-0.313834	0.126915		0.393749	0.29028	-0.517575	0.329934
935	0.370806	0.238047	-0.313995	0.126836		0.394075	0.291009	-0.517779	0.329311
936	0.372875	0.237615	-0.314119	0.12676		0.394418	0.291728	-0.517963	0.32868
937	0.374937	0.237179	-0.314206	0.126687		0.394778	0.292439	-0.518125	0.328041
938	0.376994	0.236739	-0.314258	0.126618		0.395155	0.29314	-0.518268	0.327393
939	0.379044	0.236297	-0.314276	0.126552		0.395549	0.293833	-0.518391	0.326736
940	0.381087	0.235851	-0.31426	0.126491		0.39596	0.294516	-0.518495	0.326072
941	0.383123	0.235402	-0.314212	0.126434		0.396388	0.295191	-0.518579	0.325399
942	0.38515	0.234951	-0.314133	0.126382		0.396833	0.295857	-0.518645	0.324718
943	0.387169	0.234497	-0.314024	0.126336		0.397295	0.296513	-0.518693	0.324028
944	0.389179	0.234042	-0.313887	0.126296		0.397774	0.297161	-0.518722	0.323331
945	0.391181	0.233585	-0.313722	0.126262		0.398269	0.2978	-0.518734	0.322626
946	0.393172	0.233127	-0.31353	0.126236		0.39878	0.29843	-0.518728	0.321913
947	0.395154	0.232668	-0.313314	0.126216		0.399307	0.299052	-0.518705	0.321192
948	0.397126	0.232208	-0.313074	0.126204		0.39985	0.299664	-0.518665	0.320464
949	0.399087	0.231749	-0.312811	0.1262		0.400408	0.300267	-0.518608	0.319728
950	0.401037	0.23129	-0.312527	0.126205		0.400981	0.300862	-0.518535	0.318985
951	0.402976	0.230831	-0.312223	0.126218		0.401569	0.301448	-0.518445	0.318235
952	0.404904	0.230373	-0.3119	0.126241		0.402171	0.302024	-0.518339	0.317478
953	0.40682	0.229917	-0.311559	0.126273		0.402787	0.302592	-0.518216	0.316714
954	0.408725	0.229462	-0.311202	0.126315		0.403416	0.303151	-0.518078	0.315943
955	0.410617	0.22901	-0.31083	0.126368		0.404057	0.303701	-0.517924	0.315166
956	0.412496	0.22856	-0.310443	0.126431		0.404711	0.304241	-0.517755	0.314382
957	0.414363	0.228113	-0.310043	0.126505		0.405377	0.304773	-0.517569	0.313592
958	0.416216	0.22767	-0.309632	0.12659		0.406054	0.305296	-0.517369	0.312796
959	0.418056	0.22723	-0.309209	0.126687		0.406741	0.305809	-0.517152	0.311993
960	0.419882	0.226793	-0.308777	0.126795		0.407438	0.306314	-0.516921	0.311184
961	0.421694	0.226361	-0.308336	0.126915		0.408145	0.306809	-0.516674	0.310368
962	0.423491	0.225934	-0.307888	0.127047		0.408859	0.307295	-0.516412	0.309547
963	0.425274	0.225511	-0.307433	0.127191		0.409582	0.307771	-0.516134	0.30872
964	0.427041	0.225093	-0.306972	0.127347		0.410311	0.308239	-0.515842	0.307886
965	0.428793	0.22468	-0.306506	0.127516		0.411047	0.308697	-0.515535	0.307047
966	0.430529	0.224273	-0.306037	0.127697		0.411788	0.309146	-0.515213	0.306201
967	0.432248	0.223871	-0.305565	0.127891		0.412534	0.309586	-0.514876	0.30535
968	0.433951	0.223475	-0.305091	0.128097		0.413284	0.310016	-0.514525	0.304493
969	0.435636	0.223085	-0.304616	0.128316		0.414036	0.310436	-0.514159	0.30363
970	0.437304	0.222701	-0.30414	0.128548		0.414791	0.310848	-0.513779	0.302762
971	0.438953	0.222324	-0.303665	0.128792		0.415547	0.31125	-0.513385	0.301888
972	0.440583	0.221952	-0.303191	0.129048		0.416304	0.311642	-0.512977	0.301009
973	0.442194	0.221587	-0.302719	0.129317		0.41706	0.312026	-0.512555	0.300125
974	0.443785	0.221229	-0.302249	0.129599		0.417816	0.3124	-0.512119	0.299235
975	0.445355	0.220877	-0.301783	0.129892		0.418569	0.312765	-0.51167	0.298341
976	0.446904	0.220532	-0.301322	0.130198		0.419319	0.31312	-0.511207	0.297441
977	0.448431	0.220194	-0.300865	0.130516		0.420065	0.313467	-0.510731	0.296537
978	0.449935	0.219862	-0.300414	0.130845		0.420806	0.313804	-0.510241	0.295629
979	0.451416	0.219538	-0.299969	0.131185		0.421542	0.314133	-0.509738	0.294717
980	0.452872	0.21922	-0.299532	0.131537		0.422271	0.314453	-0.509223	0.2938
981	0.454303	0.21891	-0.299102	0.1319		0.422992	0.314764	-0.508694	0.29288
982	0.455709	0.218606	-0.298681	0.132274		0.423706	0.315067	-0.508151	0.291957
983	0.457087	0.21831	-0.29827	0.132658		0.42441	0.315361	-0.507596	0.29103
984	0.458438	0.218021	-0.297869	0.133052		0.425103	0.315647	-0.507028	0.2901
985	0.45976	0.21774	-0.297479	0.133455		0.425786	0.315926	-0.506447	0.289168
986	0.461053	0.217465	-0.297101	0.133869		0.426457	0.316196	-0.505853	0.288234
987	0.462315	0.217198	-0.296735	0.134291		0.427116	0.316458	-0.505247	0.287297
988	0.463546	0.216939	-0.296383	0.134722		0.427761	0.316714	-0.504628	0.286359
989	0.464743	0.216687	-0.296045	0.135162		0.428392	0.316961	-0.503997	0.285419
990	0.465908	0.216442	-0.295722	0.135609		0.429008	0.317202	-0.503354	0.284478
991	0.467037	0.216206	-0.295414	0.136065		0.429609	0.317436	-0.502698	0.283537
992	0.468132	0.215976	-0.295122	0.136528		0.430195	0.317663	-0.502032	0.282595
993	0.469189	0.215755	-0.294847	0.136998		0.430764	0.317884	-0.501354	0.281654
994	0.470209	0.215541	-0.29459	0.137474		0.431316	0.318099	-0.500666	0.280713
995	0.471191	0.215335	-0.29435	0.137958		0.431852	0.318308	-0.499968	0.279772
996	0.472134	0.215137	-0.294129	0.138447		0.43237	0.318511	-0.49926	0.278833
997	0.473036	0.214947	-0.293927	0.138943		0.43287	0.318709	-0.498543	0.277895
998	0.473898	0.214765	-0.293745	0.139443		0.433353	0.318902	-0.497818	0.27696
999	0.474717	0.214591	-0.293584	0.139949		0.433817	0.31909	-0.497086	0.276026
1000	0.475495	0.214425	-0.293443	0.14046		0.434263	0.319273	-0.496346	0.275096
1001	0.476229	0.214267	-0.293323	0.140976		0.43469	0.319452	-0.495601	0.274168
1002	0.476919	0.214117	-0.293225	0.141496		0.435099	0.319627	-0.494851	0.273244
1003	0.477565	0.213975	-0.29315	0.14202		0.43549	0.319797	-0.494096	0.272324
1004	0.478167	0.213842	-0.293097	0.142548		0.435862	0.319965	-0.493337	0.271408
1005	0.478722	0.213716	-0.293067	0.143079		0.436217	0.320129	-0.492576	0.270496
1006	0.479232	0.213599	-0.293061	0.143613		0.436552	0.32029	-0.491813	0.26959
1007	0.479696	0.21349	-0.293079	0.14415		0.436871	0.320448	-0.49105	0.268689
1008	0.480113	0.213389	-0.29312	0.14469		0.437171	0.320604	-0.490286	0.267794
1009	0.480483	0.213296	-0.293186	0.145232		0.437454	0.320758	-0.489523	0.266906
1010	0.480806	0.213211	-0.293277	0.145776		0.43772	0.320909	-0.488761	0.266023
1011	0.481083	0.213134	-0.293393	0.146322		0.43797	0.32106	-0.488002	0.265148
1012	0.481312	0.213066	-0.293533	0.146869		0.438203	0.321208	-0.487247	0.26428
1013	0.481494	0.213005	-0.293698	0.147417		0.438421	0.321356	-0.486496	0.263419
1014	0.481629	0.212951	-0.293889	0.147966		0.438624	0.321503	-0.48575	0.262566
1015	0.481718	0.212906	-0.294105	0.148515		0.438811	0.321649	-0.48501	0.261721
1016	0.481759	0.212867	-0.294345	0.149065		0.438985	0.321796	-0.484278	0.260884
1017	0.481754	0.212837	-0.294611	0.149614		0.439146	0.321942	-0.483553	0.260056
1018	0.481702	0.212813	-0.294902	0.150162		0.439293	0.322088	-0.482836	0.259237
1019	0.481605	0.212796	-0.295218	0.150709		0.439428	0.322235	-0.482129	0.258427
1020	0.481462	0.212786	-0.295558	0.151255		0.439552	0.322382	-0.481432	0.257627
1021	0.481274	0.212782	-0.295922	0.151799		0.439664	0.322531	-0.480746	0.256835
1022	0.481042	0.212785	-0.29631	0.152342		0.439767	0.32268	-0.480072	0.256054
1023	0.480765	0.212793	-0.296722	0.152881		0.43986	0.322832	-0.47941	0.255282
1024	0.480445	0.212807	-0.297156	0.153418		0.439944	0.322985	-0.47876	0.254521
1025	0.480083	0.212827	-0.297613	0.153951		0.44002	0.32314	-0.478124	0.253769
1026	0.479678	0.212851	-0.298091	0.154481		0.440089	0.323298	-0.477502	0.253028
1027	0.479233	0.21288	-0.298591	0.155007		0.440151	0.323458	-0.476895	0.252297
1028	0.478747	0.212913	-0.299112	0.155528		0.440208	0.323622	-0.476302	0.251576
1029	0.478222	0.21295	-0.299652	0.156044		0.440261	0.323788	-0.475725	0.250866
1030	0.477659	0.212991	-0.300211	0.156555		0.440309	0.323959	-0.475163	0.250167
1031	0.477058	0.213034	-0.300788	0.15706		0.440355	0.324133	-0.474617	0.249478
1032	0.476421	0.21308	-0.301382	0.157559		0.440398	0.324311	-0.474088	0.2488
1033	0.475749	0.213129	-0.301992	0.158051		0.440441	0.324494	-0.473575	0.248133
1034	0.475042	0.213179	-0.302617	0.158536		0.440483	0.324681	-0.473079	0.247477
1035	0.474303	0.213231	-0.303255	0.159014		0.440526	0.324874	-0.472599	0.246832
1036	0.473532	0.213284	-0.303907	0.159484		0.440571	0.325073	-0.472136	0.246198
1037	0.47273	0.213338	-0.304569	0.159946		0.440618	0.325277	-0.47169	0.245575
1038	0.4719	0.213392	-0.305241	0.160398		0.440669	0.325488	-0.47126	0.244963
1039	0.471041	0.213446	-0.305922	0.160842		0.440726	0.325705	-0.470847	0.244362
1040	0.470156	0.2135	-0.30661	0.161275		0.440788	0.325929	-0.470451	0.243773
1041	0.469246	0.213553	-0.307303	0.161699		0.440857	0.32616	-0.470071	0.243194
1042	0.468312	0.213605	-0.308001	0.162112		0.440935	0.326399	-0.469707	0.242627
1043	0.467355	0.213655	-0.308701	0.162514		0.441022	0.326646	-0.469359	0.242072
1044	0.466378	0.213704	-0.309402	0.162905		0.441119	0.326902	-0.469027	0.241528
1045	0.46538	0.213751	-0.310102	0.163284		0.441228	0.327166	-0.468709	0.240995
1046	0.464365	0.213795	-0.3108	0.16365		0.441349	0.327439	-0.468406	0.240474
1047	0.463332	0.213837	-0.311493	0.164004		0.441485	0.327721	-0.468118	0.239965
1048	0.462284	0.213876	-0.312181	0.164345		0.441636	0.328013	-0.467844	0.239466
1049	0.461222	0.213912	-0.312862	0.164673		0.441803	0.328315	-0.467583	0.23898
1050	0.460148	0.213944	-0.313533	0.164986		0.441988	0.328628	-0.467334	0.238505
1051	0.459062	0.213973	-0.314193	0.165286		0.442192	0.328951	-0.467099	0.238041
1052	0.457966	0.213998	-0.31484	0.165571		0.442416	0.329285	-0.466875	0.237589
1053	0.456862	0.214018	-0.315473	0.165841		0.442661	0.329631	-0.466662	0.237148
1054	0.455751	0.214035	-0.31609	0.166096		0.442928	0.329988	-0.46646	0.236719
1055	0.454634	0.214047	-0.316689	0.166335		0.443218	0.330357	-0.466269	0.236301
1056	0.453513	0.214055	-0.317268	0.166559		0.443533	0.330739	-0.466086	0.235894
1057	0.45239	0.214057	-0.317827	0.166767		0.443873	0.331133	-0.465913	0.235499
1058	0.451264	0.214055	-0.318362	0.166959		0.44424	0.33154	-0.465749	0.235114
1059	0.450139	0.214048	-0.318874	0.167135		0.444633	0.33196	-0.465592	0.23474
1060	0.449014	0.214036	-0.319359	0.167294		0.445055	0.332394	-0.465442	0.234378
1061	0.447892	0.214018	-0.319818	0.167437		0.445506	0.332841	-0.465299	0.234025
1062	0.446774	0.213996	-0.320248	0.167563		0.445987	0.333302	-0.465161	0.233684
1063	0.44566	0.213968	-0.320649	0.167672		0.446499	0.333777	-0.465029	0.233352
1064	0.444552	0.213934	-0.321019	0.167764		0.447041	0.334266	-0.464902	0.233031
1065	0.443452	0.213896	-0.321357	0.16784		0.447615	0.33477	-0.464778	0.23272
1066	0.44236	0.213852	-0.321662	0.167898		0.448221	0.335288	-0.464658	0.232418
1067	0.441278	0.213802	-0.321934	0.167939		0.44886	0.335821	-0.46454	0.232127
1068	0.440207	0.213747	-0.32217	0.167963		0.449532	0.336369	-0.464425	0.231844
1069	0.439147	0.213687	-0.322372	0.16797		0.450237	0.336931	-0.464311	0.231571
1070	0.438101	0.213622	-0.322537	0.16796		0.450976	0.337509	-0.464198	0.231307
1071	0.437069	0.213551	-0.322666	0.167933		0.451748	0.338102	-0.464085	0.231052
1072	0.436051	0.213475	-0.322758	0.167888		0.452554	0.33871	-0.463972	0.230806
1073	0.43505	0.213393	-0.322813	0.167827		0.453393	0.339333	-0.463859	0.230568
1074	0.434066	0.213306	-0.322829	0.16775		0.454266	0.339971	-0.463743	0.230338
1075	0.4331	0.213214	-0.322808	0.167655		0.455173	0.340624	-0.463627	0.230116
1076	0.432153	0.213117	-0.322749	0.167544		0.456113	0.341293	-0.463508	0.229902
1077	0.431225	0.213015	-0.322651	0.167417		0.457086	0.341976	-0.463386	0.229696
1078	0.430319	0.212907	-0.322515	0.167273		0.458092	0.342675	-0.463261	0.229497
1079	0.429433	0.212794	-0.322342	0.167114		0.459131	0.343389	-0.463133	0.229304
1080	0.428571	0.212677	-0.32213	0.166939		0.460203	0.344118	-0.463002	0.229119
1081	0.427731	0.212554	-0.321881	0.166748		0.461306	0.344862	-0.462867	0.22894
1082	0.426915	0.212426	-0.321595	0.166542		0.462442	0.345621	-0.462728	0.228767
1083	0.426124	0.212294	-0.321272	0.166321		0.463608	0.346395	-0.462585	0.2286
1084	0.425358	0.212157	-0.320912	0.166086		0.464806	0.347183	-0.462437	0.228439
1085	0.424617	0.212015	-0.320517	0.165837		0.466034	0.347986	-0.462285	0.228284
1086	0.423904	0.211868	-0.320087	0.165573		0.467293	0.348803	-0.462129	0.228133
1087	0.423218	0.211718	-0.319622	0.165297		0.468581	0.349635	-0.461969	0.227987
1088	0.422559	0.211562	-0.319123	0.165007		0.469898	0.350481	-0.461804	0.227846
1089	0.421928	0.211403	-0.318592	0.164705		0.471243	0.351341	-0.461635	0.22771
1090	0.421326	0.21124	-0.318028	0.164392		0.472616	0.352215	-0.461461	0.227577
1091	0.420754	0.211072	-0.317434	0.164067		0.474017	0.353103	-0.461283	0.227448
1092	0.42021	0.210901	-0.31681	0.163731		0.475444	0.354004	-0.461102	0.227323
1093	0.419697	0.210727	-0.316157	0.163385		0.476897	0.354919	-0.460917	0.227201
1094	0.419214	0.210549	-0.315476	0.16303		0.478375	0.355847	-0.460728	0.227082
1095	0.418761	0.210369	-0.31477	0.162667		0.479877	0.356788	-0.460536	0.226966
1096	0.41834	0.210185	-0.314038	0.162295		0.481403	0.357742	-0.460341	0.226852
1097	0.41795	0.209999	-0.313283	0.161916		0.482951	0.358708	-0.460143	0.22674
1098	0.417591	0.209811	-0.312506	0.161531		0.484521	0.359686	-0.459943	0.226631
1099	0.417264	0.20962	-0.311709	0.16114		0.486113	0.360676	-0.45974	0.226523
1100	0.416969	0.209427	-0.310892	0.160744		0.487724	0.361678	-0.459536	0.226416
1101	0.416706	0.209233	-0.310059	0.160344		0.489354	0.362691	-0.45933	0.226311
1102	0.416474	0.209037	-0.30921	0.15994		0.491002	0.363715	-0.459124	0.226207
1103	0.416275	0.20884	-0.308347	0.159535		0.492667	0.364749	-0.458916	0.226104
1104	0.416109	0.208642	-0.307472	0.159127		0.494347	0.365794	-0.458708	0.226002
1105	0.415974	0.208444	-0.306586	0.158719		0.496043	0.366848	-0.458499	0.225899
1106	0.415872	0.208245	-0.305693	0.15831		0.497752	0.367912	-0.458291	0.225797
1107	0.415802	0.208047	-0.304793	0.157903		0.499473	0.368984	-0.458084	0.225695
1108	0.415764	0.207848	-0.303888	0.157497		0.501205	0.370064	-0.457877	0.225593
1109	0.415759	0.20765	-0.302981	0.157094		0.502947	0.371153	-0.457672	0.225491
1110	0.415786	0.207454	-0.302073	0.156694		0.504697	0.372248	-0.457468	0.225387
1111	0.415845	0.207258	-0.301167	0.156298		0.506454	0.37335	-0.457266	0.225283
1112	0.415936	0.207065	-0.300264	0.155907		0.508217	0.374458	-0.457066	0.225178
1113	0.416059	0.206873	-0.299366	0.155522		0.509984	0.375572	-0.456869	0.225072
1114	0.416214	0.206684	-0.298476	0.155144		0.511754	0.376691	-0.456674	0.224964
1115	0.416401	0.206498	-0.297595	0.154773		0.513525	0.377814	-0.456484	0.224855
1116	0.416618	0.206315	-0.296726	0.15441		0.515296	0.378941	-0.456296	0.224744
1117	0.416867	0.206136	-0.29587	0.154056		0.517064	0.38007	-0.456113	0.224631
1118	0.417146	0.205961	-0.295029	0.153712		0.518829	0.381203	-0.455934	0.224516
1119	0.417456	0.205791	-0.294206	0.153378		0.520589	0.382336	-0.45576	0.224399
1120	0.417796	0.205625	-0.293402	0.153055		0.522342	0.383471	-0.455591	0.224279
1121	0.418165	0.205464	-0.292619	0.152744		0.524086	0.384607	-0.455428	0.224157
1122	0.418563	0.205309	-0.291858	0.152445		0.52582	0.385742	-0.45527	0.224033
1123	0.41899	0.205159	-0.291122	0.152159		0.527542	0.386877	-0.455118	0.223906
1124	0.419445	0.205016	-0.290412	0.151886		0.52925	0.38801	-0.454972	0.223776
1125	0.419927	0.20488	-0.28973	0.151628		0.530943	0.389141	-0.454833	0.223643
1126	0.420437	0.204751	-0.289077	0.151384		0.532618	0.39027	-0.454701	0.223507
1127	0.420973	0.204628	-0.288456	0.151155		0.534274	0.391395	-0.454576	0.223368
1128	0.421534	0.204513	-0.287866	0.150942		0.535909	0.392517	-0.454459	0.223225
1129	0.422121	0.204406	-0.28731	0.150744		0.537522	0.393635	-0.454349	0.223079
1130	0.422732	0.204307	-0.286789	0.150563		0.53911	0.394748	-0.454247	0.22293
1131	0.423367	0.204217	-0.286305	0.150399		0.540671	0.395856	-0.454153	0.222777
1132	0.424025	0.204134	-0.285858	0.150251		0.542205	0.396959	-0.454068	0.22262
1133	0.424705	0.204061	-0.28545	0.150121		0.543708	0.398055	-0.453992	0.22246
1134	0.425407	0.203996	-0.285082	0.150009		0.545179	0.399145	-0.453924	0.222295
1135	0.426129	0.20394	-0.284756	0.149915		0.546617	0.400228	-0.453866	0.222127
1136	0.426872	0.203893	-0.284471	0.149839		0.548019	0.401304	-0.453817	0.221954
1137	0.427633	0.203855	-0.284229	0.149782		0.549384	0.402373	-0.453778	0.221778
1138	0.428413	0.203826	-0.284032	0.149743		0.550711	0.403433	-0.453749	0.221597
1139	0.42921	0.203807	-0.28388	0.149723		0.551996	0.404486	-0.45373	0.221413
1140	0.430023	0.203796	-0.283773	0.149722		0.553238	0.40553	-0.453722	0.221224
1141	0.430851	0.203795	-0.283714	0.14974		0.554437	0.406566	-0.453725	0.221031
1142	0.431694	0.203803	-0.283701	0.149777		0.555589	0.407593	-0.453739	0.220834
1143	0.43255	0.203819	-0.283737	0.149833		0.556694	0.40861	-0.453765	0.220633
1144	0.433418	0.203845	-0.283822	0.149908		0.55775	0.409619	-0.453802	0.220428
1145	0.434297	0.203878	-0.283956	0.150002		0.558754	0.410618	-0.453851	0.220219
1146	0.435186	0.203921	-0.284139	0.150115		0.559707	0.411607	-0.453913	0.220007
1147	0.436083	0.203971	-0.284373	0.150246		0.560605	0.412586	-0.453987	0.21979
1148	0.436986	0.204029	-0.284658	0.150397		0.561448	0.413555	-0.454074	0.219571
1149	0.437896	0.204095	-0.284993	0.150566		0.562234	0.414514	-0.454174	0.219348
1150	0.438809	0.204168	-0.28538	0.150753		0.562963	0.415462	-0.454287	0.219121
1151	0.439725	0.204248	-0.285817	0.150958		0.563631	0.4164	-0.454413	0.218891
1152	0.440642	0.204334	-0.286307	0.151181		0.56424	0.417327	-0.454553	0.218659
1153	0.441558	0.204427	-0.286848	0.151421		0.564786	0.418244	-0.454707	0.218423
1154	0.442472	0.204525	-0.28744	0.151679		0.56527	0.419149	-0.454874	0.218185
1155	0.443383	0.204629	-0.288084	0.151954		0.565689	0.420043	-0.455055	0.217944
1156	0.444289	0.204737	-0.28878	0.152245		0.566044	0.420926	-0.45525	0.217701
1157	0.445187	0.20485	-0.289526	0.152552		0.566333	0.421798	-0.455458	0.217455
1158	0.446077	0.204967	-0.290324	0.152875		0.566556	0.422658	-0.455681	0.217208
1159	0.446957	0.205087	-0.291172	0.153214		0.566711	0.423506	-0.455917	0.216958
1160	0.447825	0.205211	-0.29207	0.153567		0.566797	0.424342	-0.456166	0.216707
1161	0.448679	0.205336	-0.293019	0.153935		0.566815	0.425166	-0.456429	0.216455
1162	0.449517	0.205464	-0.294018	0.154318		0.566764	0.425978	-0.456706	0.216201
1163	0.450338	0.205593	-0.295065	0.154714		0.566643	0.426778	-0.456996	0.215945
1164	0.45114	0.205722	-0.296162	0.155124		0.566451	0.427565	-0.457299	0.215689
1165	0.451922	0.205852	-0.297307	0.155546		0.566188	0.428339	-0.457616	0.215432
1166	0.45268	0.205982	-0.2985	0.155981		0.565854	0.4291	-0.457945	0.215175
1167	0.453414	0.20611	-0.29974	0.156429		0.565449	0.429848	-0.458287	0.214917
1168	0.454122	0.206237	-0.301026	0.156888		0.564971	0.430583	-0.458642	0.214659
1169	0.454802	0.206362	-0.302359	0.157358		0.564422	0.431305	-0.45901	0.214402
1170	0.455451	0.206483	-0.303737	0.157839		0.563801	0.432013	-0.459391	0.214144
1171	0.456069	0.206602	-0.30516	0.158331		0.563107	0.432707	-0.459784	0.213887
1172	0.456653	0.206716	-0.306626	0.158832		0.562342	0.433388	-0.46019	0.213631
1173	0.457202	0.206826	-0.308136	0.159344		0.561505	0.434054	-0.460607	0.213375
1174	0.457714	0.20693	-0.309688	0.159864		0.560597	0.434706	-0.461038	0.213121
1175	0.458186	0.207029	-0.311282	0.160393		0.559617	0.435344	-0.46148	0.212868
1176	0.458618	0.207121	-0.312916	0.160931		0.558566	0.435968	-0.461934	0.212617
1177	0.459007	0.207207	-0.31459	0.161477		0.557444	0.436577	-0.4624	0.212367
1178	0.459352	0.207285	-0.316303	0.16203		0.556253	0.437171	-0.462878	0.212119
1179	0.459652	0.207354	-0.318053	0.162591		0.554991	0.43775	-0.463368	0.211874
1180	0.459904	0.207416	-0.31984	0.163159		0.55366	0.438315	-0.463869	0.21163
1181	0.460107	0.207468	-0.321664	0.163734		0.552261	0.438864	-0.464381	0.211389
1182	0.46026	0.207511	-0.323522	0.164315		0.550794	0.439398	-0.464905	0.21115
1183	0.460361	0.207543	-0.325413	0.164902		0.54926	0.439917	-0.465439	0.210914
1184	0.460409	0.207565	-0.327337	0.165495		0.54766	0.44042	-0.465984	0.210681
1185	0.460404	0.207576	-0.329293	0.166092		0.545994	0.440908	-0.466541	0.210451
1186	0.460343	0.207576	-0.331279	0.166695		0.544263	0.44138	-0.467107	0.210224
1187	0.460226	0.207564	-0.333294	0.167303		0.542469	0.441836	-0.467684	0.21
1188	0.460052	0.207539	-0.335337	0.167914		0.540613	0.442276	-0.468272	0.20978
1189	0.459821	0.207501	-0.337407	0.16853		0.538695	0.4427	-0.46887	0.209562
1190	0.45953	0.207451	-0.339502	0.169149		0.536716	0.443107	-0.469478	0.209349
1191	0.459181	0.207387	-0.341622	0.169771		0.534679	0.443499	-0.470095	0.209139
1192	0.458771	0.207309	-0.343765	0.170396		0.532583	0.443873	-0.470723	0.208933
1193	0.458302	0.207217	-0.34593	0.171024		0.53043	0.444231	-0.47136	0.20873
1194	0.457772	0.207111	-0.348115	0.171654		0.528221	0.444571	-0.472007	0.208532
1195	0.457181	0.20699	-0.350319	0.172287		0.525958	0.444895	-0.472663	0.208337
1196	0.456529	0.206854	-0.35254	0.17292		0.523642	0.445201	-0.473329	0.208146
1197	0.455816	0.206703	-0.354779	0.173555		0.521275	0.445489	-0.474003	0.207959
1198	0.455042	0.206537	-0.357032	0.174191		0.518858	0.44576	-0.474687	0.207776
1199	0.454207	0.206356	-0.359299	0.174828		0.516392	0.446013	-0.475379	0.207596
1200	0.453311	0.206159	-0.361577	0.175465		0.513879	0.446248	-0.476079	0.207421
1201	0.452355	0.205947	-0.363867	0.176101		0.51132	0.446464	-0.476787	0.207249
1202	0.451339	0.205719	-0.366165	0.176738		0.508718	0.446662	-0.477502	0.207081
1203	0.450263	0.205475	-0.368471	0.177374		0.506075	0.446841	-0.478224	0.206916
1204	0.449128	0.205216	-0.370783	0.178008		0.50339	0.447001	-0.478953	0.206755
1205	0.447934	0.204941	-0.373099	0.178641		0.500668	0.447142	-0.479688	0.206597
1206	0.446683	0.204651	-0.375418	0.179273		0.497908	0.447264	-0.480429	0.206443
1207	0.445374	0.204345	-0.377738	0.179902		0.495114	0.447367	-0.481175	0.206292
1208	0.44401	0.204023	-0.380057	0.180528		0.492287	0.447449	-0.481925	0.206144
1209	0.44259	0.203686	-0.382374	0.181152		0.489429	0.447512	-0.482679	0.205999
1210	0.441116	0.203334	-0.384686	0.181773		0.486542	0.447555	-0.483436	0.205857
1211	0.439589	0.202967	-0.386993	0.18239		0.483628	0.447578	-0.484197	0.205718
1212	0.43801	0.202586	-0.389291	0.183003		0.480689	0.447581	-0.484959	0.205582
1213	0.436381	0.202189	-0.391581	0.183611		0.477727	0.447563	-0.485723	0.205448
1214	0.434702	0.201779	-0.393858	0.184215		0.474743	0.447524	-0.486488	0.205316
1215	0.432974	0.201354	-0.396123	0.184815		0.471741	0.447465	-0.487253	0.205187
1216	0.4312	0.200915	-0.398372	0.185409		0.468721	0.447386	-0.488017	0.205059
1217	0.429381	0.200463	-0.400605	0.185997		0.465686	0.447285	-0.488781	0.204934
1218	0.427519	0.199998	-0.402819	0.18658		0.462637	0.447163	-0.489543	0.20481
1219	0.425615	0.199519	-0.405012	0.187156		0.459577	0.447021	-0.490302	0.204687
1220	0.42367	0.199028	-0.407184	0.187726		0.456508	0.446857	-0.491058	0.204566
1221	0.421687	0.198525	-0.409331	0.188289		0.453432	0.446672	-0.491809	0.204446
1222	0.419668	0.198009	-0.411453	0.188844		0.450349	0.446465	-0.492556	0.204326
1223	0.417614	0.197482	-0.413546	0.189393		0.447263	0.446238	-0.493298	0.204207
1224	0.415528	0.196943	-0.415611	0.189933		0.444176	0.445989	-0.494033	0.204088
1225	0.413412	0.196393	-0.417644	0.190466		0.441088	0.445718	-0.494761	0.203969
1226	0.411268	0.195833	-0.419644	0.19099		0.438002	0.445426	-0.495481	0.20385
1227	0.409097	0.195262	-0.42161	0.191505		0.43492	0.445113	-0.496192	0.203731
1228	0.406903	0.194682	-0.423539	0.192012		0.431844	0.444778	-0.496893	0.20361
1229	0.404688	0.194091	-0.42543	0.19251		0.428775	0.444422	-0.497585	0.203489
1230	0.402453	0.193492	-0.42728	0.192999		0.425715	0.444044	-0.498265	0.203366
1231	0.400202	0.192884	-0.429089	0.193477		0.422666	0.443644	-0.498932	0.203241
1232	0.397936	0.192267	-0.430854	0.193947		0.41963	0.443223	-0.499587	0.203115
1233	0.395658	0.191642	-0.432574	0.194406		0.416608	0.442781	-0.500228	0.202987
1234	0.39337	0.19101	-0.434248	0.194854		0.413603	0.442317	-0.500854	0.202856
1235	0.391074	0.19037	-0.435873	0.195293		0.410615	0.441832	-0.501465	0.202723
1236	0.388773	0.189723	-0.437448	0.19572		0.407647	0.441326	-0.50206	0.202587
1237	0.386469	0.189071	-0.438972	0.196137		0.4047	0.440798	-0.502637	0.202447
1238	0.384164	0.188412	-0.440443	0.196543		0.401775	0.44025	-0.503196	0.202305
1239	0.381861	0.187747	-0.441859	0.196937		0.398874	0.43968	-0.503736	0.202159
1240	0.37956	0.187078	-0.443221	0.19732		0.395999	0.43909	-0.504257	0.202009
1241	0.377265	0.186403	-0.444525	0.197692		0.393151	0.438479	-0.504756	0.201855
1242	0.374978	0.185725	-0.445772	0.198051		0.390332	0.437848	-0.505235	0.201697
1243	0.3727	0.185043	-0.446959	0.198399		0.387542	0.437197	-0.505691	0.201534
1244	0.370434	0.184357	-0.448087	0.198734		0.384783	0.436526	-0.506125	0.201367
1245	0.36818	0.183668	-0.449153	0.199057		0.382056	0.435835	-0.506535	0.201195
1246	0.365942	0.182977	-0.450158	0.199368		0.379362	0.435126	-0.506921	0.201018
1247	0.363721	0.182284	-0.4511	0.199666		0.376703	0.434397	-0.507282	0.200836
1248	0.361518	0.181589	-0.451979	0.199951		0.374079	0.43365	-0.507619	0.200648
1249	0.359335	0.180892	-0.452794	0.200224		0.371492	0.432886	-0.507929	0.200455
1250	0.357175	0.180195	-0.453544	0.200484		0.368943	0.432103	-0.508214	0.200256
1251	0.355038	0.179498	-0.454229	0.20073		0.366431	0.431304	-0.508473	0.200052
1252	0.352926	0.178801	-0.454848	0.200963		0.36396	0.430488	-0.508704	0.199841
1253	0.35084	0.178104	-0.455402	0.201183		0.361528	0.429655	-0.508909	0.199624
1254	0.348782	0.177409	-0.455889	0.20139		0.359137	0.428808	-0.509087	0.199401
1255	0.346754	0.176714	-0.456311	0.201582		0.356788	0.427945	-0.509237	0.199172
1256	0.344756	0.176022	-0.456665	0.201762		0.354481	0.427067	-0.509359	0.198936
1257	0.342789	0.175332	-0.456954	0.201927		0.352217	0.426175	-0.509454	0.198693
1258	0.340856	0.174645	-0.457175	0.202079		0.349996	0.42527	-0.509521	0.198443
1259	0.338956	0.173962	-0.457331	0.202217		0.347819	0.424352	-0.509561	0.198187
1260	0.337091	0.173282	-0.45742	0.202341		0.345686	0.423421	-0.509572	0.197923
1261	0.335262	0.172607	-0.457444	0.202451		0.343597	0.422478	-0.509556	0.197652
1262	0.333469	0.171936	-0.457402	0.202547		0.341554	0.421524	-0.509512	0.197374
1263	0.331714	0.17127	-0.457294	0.202629		0.339555	0.420559	-0.509441	0.197088
1264	0.329997	0.17061	-0.457122	0.202698		0.337601	0.419583	-0.509342	0.196795
1265	0.328317	0.169956	-0.456886	0.202752		0.335692	0.418597	-0.509216	0.196494
1266	0.326677	0.169308	-0.456587	0.202793		0.333828	0.417601	-0.509062	0.196185
1267	0.325076	0.168666	-0.456224	0.202821		0.33201	0.416596	-0.508882	0.195869
1268	0.323514	0.168032	-0.4558	0.202834		0.330235	0.415583	-0.508675	0.195544
1269	0.321992	0.167405	-0.455315	0.202835		0.328506	0.414561	-0.508442	0.195211
1270	0.32051	0.166786	-0.454769	0.202822		0.326821	0.413532	-0.508183	0.19487
1271	0.319069	0.166175	-0.454164	0.202796		0.325181	0.412495	-0.507898	0.194521
1272	0.317667	0.165572	-0.453501	0.202757		0.323584	0.411452	-0.507587	0.194163
1273	0.316305	0.164978	-0.452781	0.202706		0.322031	0.410402	-0.507252	0.193797
1274	0.314983	0.164393	-0.452005	0.202642		0.320522	0.409345	-0.506891	0.193422
1275	0.313702	0.163817	-0.451174	0.202565		0.319056	0.408283	-0.506507	0.193039
1276	0.31246	0.16325	-0.450291	0.202477		0.317633	0.407216	-0.506099	0.192648
1277	0.311258	0.162693	-0.449355	0.202377		0.316252	0.406144	-0.505667	0.192248
1278	0.310095	0.162145	-0.448369	0.202266		0.314912	0.405067	-0.505213	0.19184
1279	0.308972	0.161607	-0.447334	0.202144		0.313614	0.403986	-0.504736	0.191423
1280	0.307888	0.16108	-0.446251	0.202011		0.312357	0.402901	-0.504238	0.190999
1281	0.306843	0.160562	-0.445122	0.201867		0.31114	0.401813	-0.503719	0.190565
1282	0.305836	0.160055	-0.443949	0.201713		0.309962	0.400721	-0.503179	0.190124
1283	0.304868	0.159559	-0.442733	0.20155		0.308823	0.399627	-0.502619	0.189675
1284	0.303938	0.159073	-0.441476	0.201377		0.307722	0.398531	-0.50204	0.189218
1285	0.303046	0.158598	-0.44018	0.201195		0.306658	0.397432	-0.501442	0.188753
1286	0.302191	0.158134	-0.438845	0.201004		0.30563	0.396332	-0.500826	0.18828
1287	0.301374	0.15768	-0.437475	0.200804		0.304638	0.39523	-0.500193	0.1878
1288	0.300594	0.157238	-0.43607	0.200596		0.303681	0.394128	-0.499543	0.187313
1289	0.299851	0.156806	-0.434632	0.200381		0.302758	0.393025	-0.498877	0.186819
1290	0.299144	0.156386	-0.433163	0.200158		0.301868	0.391921	-0.498196	0.186318
1291	0.298473	0.155976	-0.431666	0.199928		0.301009	0.390818	-0.4975	0.18581
1292	0.297838	0.155578	-0.430141	0.199692		0.300182	0.389715	-0.496792	0.185296
1293	0.297238	0.155191	-0.428591	0.199448		0.299384	0.388614	-0.49607	0.184776
1294	0.296674	0.154814	-0.427018	0.199199		0.298615	0.387513	-0.495337	0.184251
1295	0.296144	0.154449	-0.425423	0.198944		0.297875	0.386414	-0.494594	0.18372
1296	0.295648	0.154095	-0.423808	0.198684		0.297161	0.385317	-0.49384	0.183185
1297	0.295186	0.153753	-0.422175	0.198419		0.296472	0.384222	-0.493078	0.182645
1298	0.294757	0.153421	-0.420526	0.198148		0.295808	0.38313	-0.492307	0.182101
1299	0.294361	0.1531	-0.418863	0.197874		0.295168	0.38204	-0.49153	0.181554
1300	0.293997	0.152791	-0.417188	0.197595		0.29455	0.380955	-0.490746	0.181003
1301	0.293665	0.152493	-0.415502	0.197312		0.293952	0.379873	-0.489958	0.18045
1302	0.293364	0.152205	-0.413807	0.197025		0.293375	0.378795	-0.489165	0.179895
1303	0.293094	0.151929	-0.412105	0.196735		0.292816	0.377722	-0.488368	0.179338
1304	0.292853	0.151665	-0.410399	0.196442		0.292275	0.376655	-0.48757	0.178781
1305	0.292642	0.151411	-0.408688	0.196146		0.291751	0.375592	-0.486769	0.178222
1306	0.29246	0.151168	-0.406976	0.195848		0.291241	0.374536	-0.485968	0.177664
1307	0.292307	0.150937	-0.405264	0.195547		0.290745	0.373485	-0.485167	0.177107
1308	0.292181	0.150716	-0.403553	0.195243		0.290262	0.372442	-0.484367	0.176551
1309	0.292081	0.150507	-0.401845	0.194938		0.289791	0.371406	-0.483569	0.175997
1310	0.292009	0.150309	-0.400142	0.19463		0.28933	0.370377	-0.482773	0.175446
1311	0.291962	0.150122	-0.398444	0.194321		0.288878	0.369357	-0.48198	0.174899
1312	0.29194	0.149946	-0.396753	0.19401		0.288434	0.368345	-0.481191	0.174355
1313	0.291944	0.149781	-0.395071	0.193698		0.287997	0.367342	-0.480407	0.173816
1314	0.291971	0.149627	-0.393399	0.193385		0.287566	0.366349	-0.479627	0.173282
1315	0.292022	0.149484	-0.391738	0.193071		0.28714	0.365366	-0.478853	0.172754
1316	0.292096	0.149352	-0.390089	0.192755		0.286718	0.364394	-0.478084	0.172233
1317	0.292193	0.149231	-0.388453	0.192439		0.286299	0.363432	-0.477322	0.171719
1318	0.292312	0.149121	-0.386833	0.192123		0.285882	0.362482	-0.476567	0.171213
1319	0.292452	0.149023	-0.385227	0.191806		0.285465	0.361544	-0.475819	0.170716
1320	0.292613	0.148935	-0.383639	0.191488		0.285049	0.360619	-0.475079	0.170228
1321	0.292794	0.148858	-0.382069	0.19117		0.284632	0.359706	-0.474346	0.169749
1322	0.292995	0.148793	-0.380517	0.190852		0.284213	0.358806	-0.473621	0.169281
1323	0.293215	0.148738	-0.378985	0.190534		0.283791	0.35792	-0.472905	0.168824
1324	0.293454	0.148694	-0.377474	0.190216		0.283366	0.357048	-0.472197	0.168378
1325	0.29371	0.148661	-0.375984	0.189898		0.282936	0.356191	-0.471498	0.167945
1326	0.293983	0.148638	-0.374517	0.189581		0.282502	0.355349	-0.470808	0.167524
1327	0.294272	0.148627	-0.373073	0.189264		0.282062	0.354522	-0.470126	0.167116
1328	0.294576	0.148626	-0.371653	0.188947		0.281615	0.35371	-0.469454	0.166721
1329	0.294896	0.148636	-0.370259	0.188631		0.28116	0.352915	-0.468791	0.166341
1330	0.295229	0.148656	-0.368889	0.188316		0.280698	0.352136	-0.468138	0.165975
1331	0.295576	0.148687	-0.367547	0.188001		0.280227	0.351373	-0.467493	0.165624
1332	0.295935	0.148729	-0.366231	0.187688		0.279746	0.350628	-0.466858	0.165288
1333	0.296305	0.148781	-0.364942	0.187375		0.279256	0.3499	-0.466233	0.164968
1334	0.296685	0.148843	-0.363682	0.187063		0.278755	0.34919	-0.465617	0.164664
1335	0.297075	0.148916	-0.36245	0.186753		0.278243	0.348498	-0.46501	0.164376
1336	0.297474	0.149	-0.361248	0.186444		0.27772	0.347824	-0.464413	0.164105
1337	0.29788	0.149094	-0.360075	0.186136		0.277185	0.34717	-0.463825	0.163851
1338	0.298292	0.149199	-0.358933	0.18583		0.276637	0.346534	-0.463247	0.163615
1339	0.29871	0.149314	-0.357821	0.185525		0.276076	0.345918	-0.462679	0.163395
1340	0.299132	0.149439	-0.35674	0.185222		0.275503	0.345322	-0.462119	0.163194
1341	0.299557	0.149575	-0.355691	0.18492		0.274915	0.344746	-0.461569	0.163011
1342	0.299984	0.149722	-0.354674	0.18462		0.274314	0.34419	-0.461029	0.162846
1343	0.300413	0.14988	-0.353688	0.184322		0.273698	0.343656	-0.460498	0.1627
1344	0.300841	0.150048	-0.352735	0.184026		0.273068	0.343142	-0.459976	0.162572
1345	0.301267	0.150227	-0.351815	0.183731		0.272422	0.34265	-0.459463	0.162463
1346	0.301691	0.150416	-0.350927	0.183438		0.271762	0.34218	-0.458959	0.162373
1347	0.302111	0.150617	-0.350072	0.183148		0.271086	0.341732	-0.458465	0.162302
1348	0.302526	0.150829	-0.349251	0.182859		0.270394	0.341306	-0.457979	0.16225
1349	0.302935	0.151052	-0.348463	0.182572		0.269687	0.340903	-0.457502	0.162217
1350	0.303337	0.151286	-0.347708	0.182287		0.268963	0.340523	-0.457034	0.162203
1351	0.30373	0.151531	-0.346986	0.182004		0.268224	0.340166	-0.456575	0.162208
1352	0.304113	0.151789	-0.346298	0.181724		0.267468	0.339832	-0.456125	0.162233
1353	0.304486	0.152057	-0.345642	0.181445		0.266695	0.339522	-0.455684	0.162276
1354	0.304847	0.152338	-0.34502	0.181168		0.265907	0.339236	-0.455251	0.162338
1355	0.305195	0.15263	-0.344431	0.180893		0.265101	0.338974	-0.454827	0.16242
1356	0.305528	0.152935	-0.343875	0.18062		0.26428	0.338735	-0.454412	0.16252
1357	0.305847	0.153252	-0.343351	0.180348		0.263441	0.338521	-0.454005	0.162638
1358	0.30615	0.153581	-0.34286	0.180079		0.262587	0.338331	-0.453608	0.162776
1359	0.306436	0.153923	-0.342401	0.179811		0.261716	0.338165	-0.453219	0.162931
1360	0.306704	0.154277	-0.341974	0.179545		0.260828	0.338023	-0.452838	0.163105
1361	0.306954	0.154645	-0.341578	0.179281		0.259925	0.337906	-0.452467	0.163296
1362	0.307184	0.155025	-0.341214	0.179018		0.259005	0.337814	-0.452104	0.163506
1363	0.307395	0.155419	-0.340881	0.178757		0.25807	0.337745	-0.45175	0.163733
1364	0.307584	0.155826	-0.340579	0.178498		0.257119	0.337701	-0.451405	0.163978
1365	0.307753	0.156247	-0.340306	0.178239		0.256152	0.337681	-0.451069	0.16424
1366	0.307899	0.15668	-0.340064	0.177983		0.255171	0.337685	-0.450743	0.164519
1367	0.308023	0.157128	-0.339851	0.177727		0.254176	0.337713	-0.450425	0.164815
1368	0.308124	0.157589	-0.339668	0.177473		0.253166	0.337765	-0.450118	0.165127
1369	0.308202	0.158063	-0.339512	0.17722		0.252142	0.337841	-0.44982	0.165456
1370	0.308256	0.158551	-0.339385	0.176969		0.251106	0.337941	-0.449532	0.165801
1371	0.308287	0.159053	-0.339286	0.176719		0.250056	0.338064	-0.449254	0.166162
1372	0.308294	0.159569	-0.339213	0.176469		0.248994	0.338211	-0.448986	0.166539
1373	0.308276	0.160097	-0.339167	0.176221		0.247921	0.33838	-0.448728	0.166931
1374	0.308235	0.16064	-0.339146	0.175974		0.246836	0.338573	-0.448481	0.167339
1375	0.30817	0.161196	-0.33915	0.175728		0.245741	0.338788	-0.448245	0.167761
1376	0.308082	0.161765	-0.339179	0.175484		0.244636	0.339026	-0.44802	0.168198
1377	0.307969	0.162347	-0.339232	0.17524		0.243522	0.339287	-0.447806	0.16865
1378	0.307834	0.162943	-0.339307	0.174997		0.242398	0.339569	-0.447603	0.169116
1379	0.307676	0.163551	-0.339404	0.174755		0.241267	0.339873	-0.447412	0.169596
1380	0.307495	0.164171	-0.339522	0.174514		0.240129	0.340199	-0.447233	0.170089
1381	0.307292	0.164804	-0.339661	0.174274		0.238984	0.340546	-0.447065	0.170596
1382	0.307067	0.165449	-0.339819	0.174035		0.237833	0.340914	-0.446909	0.171116
1383	0.306822	0.166105	-0.339995	0.173797		0.236677	0.341303	-0.446766	0.171648
1384	0.306557	0.166773	-0.340188	0.17356		0.235516	0.341713	-0.446635	0.172193
1385	0.306272	0.167451	-0.340397	0.173324		0.234351	0.342143	-0.446517	0.17275
1386	0.305969	0.168139	-0.340622	0.173088		0.233184	0.342592	-0.446412	0.173319
1387	0.305647	0.168836	-0.34086	0.172854		0.232014	0.343062	-0.446319	0.173899
1388	0.305309	0.169543	-0.341111	0.17262		0.230843	0.343551	-0.44624	0.174491
1389	0.304954	0.170258	-0.341373	0.172387		0.229671	0.344059	-0.446173	0.175093
1390	0.304584	0.17098	-0.341645	0.172155		0.228499	0.344585	-0.446121	0.175705
1391	0.304201	0.17171	-0.341927	0.171924		0.227328	0.34513	-0.446081	0.176328
1392	0.303804	0.172446	-0.342216	0.171694		0.226158	0.345694	-0.446056	0.176959
1393	0.303395	0.173187	-0.342512	0.171464		0.22499	0.346274	-0.446044	0.1776
1394	0.302976	0.173933	-0.342813	0.171235		0.223825	0.346873	-0.446046	0.17825
1395	0.302547	0.174682	-0.343118	0.171007		0.222663	0.347488	-0.446062	0.178908
1396	0.30211	0.175434	-0.343426	0.170779		0.221506	0.34812	-0.446092	0.179573
1397	0.301665	0.176188	-0.343736	0.170552		0.220354	0.348769	-0.446136	0.180246
1398	0.301214	0.176943	-0.344045	0.170325		0.219207	0.349433	-0.446194	0.180926
1399	0.300758	0.177698	-0.344354	0.170098		0.218067	0.350113	-0.446267	0.181613
1400	0.300299	0.178452	-0.34466	0.169872		0.216934	0.350809	-0.446353	0.182305
1401	0.299837	0.179204	-0.344963	0.169645		0.215809	0.351519	-0.446454	0.183003
1402	0.299373	0.179953	-0.345261	0.169419		0.214692	0.352244	-0.446568	0.183706
1403	0.298909	0.180698	-0.345552	0.169192		0.213584	0.352984	-0.446697	0.184414
1404	0.298445	0.181438	-0.345837	0.168964		0.212486	0.353737	-0.44684	0.185125
1405	0.297983	0.182173	-0.346113	0.168736		0.211398	0.354504	-0.446997	0.185841
1406	0.297525	0.1829	-0.346379	0.168508		0.210321	0.355285	-0.447169	0.186559
1407	0.29707	0.18362	-0.346633	0.168278		0.209255	0.356078	-0.447354	0.187281
1408	0.29662	0.18433	-0.346876	0.168048		0.2082	0.356884	-0.447554	0.188004
1409	0.296176	0.185031	-0.347105	0.167816		0.207157	0.357703	-0.447768	0.18873
1410	0.295739	0.185721	-0.347319	0.167583		0.206127	0.358534	-0.447996	0.189456
1411	0.29531	0.1864	-0.347517	0.167349		0.20511	0.359376	-0.448238	0.190183
1412	0.29489	0.187065	-0.347698	0.167112		0.204106	0.360231	-0.448494	0.190911
1413	0.29448	0.187718	-0.347861	0.166874		0.203116	0.361096	-0.448765	0.191638
1414	0.294081	0.188356	-0.348004	0.166634		0.202139	0.361972	-0.449049	0.192364
1415	0.293693	0.188979	-0.348127	0.166392		0.201177	0.36286	-0.449348	0.19309
1416	0.293318	0.189586	-0.348229	0.166147		0.20023	0.363757	-0.44966	0.193813
1417	0.292956	0.190176	-0.348309	0.1659		0.199297	0.364665	-0.449987	0.194534
1418	0.292608	0.190749	-0.348366	0.16565		0.19838	0.365583	-0.450327	0.195253
1419	0.292274	0.191304	-0.348399	0.165397		0.197478	0.36651	-0.450682	0.195968
1420	0.291956	0.19184	-0.348407	0.165142		0.196592	0.367447	-0.45105	0.19668
1421	0.291654	0.192358	-0.348389	0.164883		0.195722	0.368392	-0.451432	0.197387
1422	0.291367	0.192855	-0.348345	0.164622		0.194867	0.369347	-0.451829	0.19809
1423	0.291098	0.193333	-0.348274	0.164357		0.194029	0.37031	-0.452239	0.198788
1424	0.290846	0.193789	-0.348175	0.164089		0.193207	0.371282	-0.452663	0.199481
1425	0.290611	0.194225	-0.348048	0.163818		0.192401	0.372261	-0.4531	0.200168
1426	0.290394	0.194639	-0.347892	0.163543		0.191612	0.373249	-0.453552	0.200848
1427	0.290196	0.195031	-0.347706	0.163264		0.190838	0.374243	-0.454017	0.201522
1428	0.290015	0.195402	-0.347491	0.162982		0.19008	0.375245	-0.454497	0.202189
1429	0.289853	0.19575	-0.347246	0.162696		0.189338	0.376254	-0.45499	0.202849
1430	0.28971	0.196075	-0.34697	0.162406		0.188612	0.377269	-0.455497	0.203502
1431	0.289585	0.196378	-0.346663	0.162112		0.187901	0.378291	-0.456017	0.204146
1432	0.289478	0.196658	-0.346326	0.161815		0.187205	0.379318	-0.456551	0.204782
1433	0.289391	0.196916	-0.345957	0.161513		0.186523	0.38035	-0.457099	0.205409
1434	0.289321	0.19715	-0.345557	0.161207		0.185857	0.381388	-0.457661	0.206028
1435	0.28927	0.197362	-0.345126	0.160897		0.185204	0.38243	-0.458235	0.206638
1436	0.289238	0.197551	-0.344663	0.160584		0.184564	0.383477	-0.458823	0.207238
1437	0.289223	0.197718	-0.344169	0.160266		0.183938	0.384527	-0.459425	0.207829
1438	0.289226	0.197862	-0.343645	0.159944		0.183325	0.38558	-0.460039	0.20841
1439	0.289246	0.197983	-0.343089	0.159618		0.182724	0.386637	-0.460667	0.208981
1440	0.289283	0.198083	-0.342504	0.159288		0.182135	0.387696	-0.461308	0.209542
1441	0.289337	0.198161	-0.341889	0.158954		0.181556	0.388757	-0.461961	0.210093
1442	0.289408	0.198216	-0.341244	0.158617		0.180989	0.38982	-0.462628	0.210633
1443	0.289494	0.198251	-0.340571	0.158275		0.180432	0.390884	-0.463307	0.211163
1444	0.289597	0.198264	-0.339869	0.15793		0.179885	0.391949	-0.463999	0.211682
1445	0.289714	0.198257	-0.33914	0.157581		0.179347	0.393014	-0.464704	0.212191
1446	0.289847	0.198229	-0.338384	0.157229		0.178818	0.39408	-0.465421	0.212689
1447	0.289993	0.198182	-0.337602	0.156873		0.178297	0.395144	-0.46615	0.213176
1448	0.290154	0.198114	-0.336795	0.156514		0.177784	0.396208	-0.466891	0.213652
1449	0.290329	0.198028	-0.335964	0.156152		0.177278	0.397271	-0.467644	0.214118
1450	0.290517	0.197923	-0.33511	0.155787		0.17678	0.398332	-0.468409	0.214573
1451	0.290717	0.1978	-0.334233	0.155419		0.176288	0.399391	-0.469186	0.215018
1452	0.290931	0.197659	-0.333335	0.155048		0.175802	0.400447	-0.469974	0.215452
1453	0.291156	0.197501	-0.332416	0.154674		0.175321	0.4015	-0.470772	0.215876
1454	0.291393	0.197327	-0.331478	0.154298		0.174846	0.402549	-0.471582	0.216289
1455	0.291642	0.197137	-0.330522	0.15392		0.174375	0.403595	-0.472402	0.216692
1456	0.291901	0.196931	-0.329548	0.15354		0.173909	0.404637	-0.473232	0.217086
1457	0.292172	0.196711	-0.328558	0.153158		0.173447	0.405674	-0.474072	0.21747
1458	0.292453	0.196477	-0.327553	0.152774		0.172988	0.406705	-0.474921	0.217845
1459	0.292745	0.196229	-0.326534	0.152389		0.172532	0.407731	-0.47578	0.21821
1460	0.293048	0.195969	-0.325503	0.152003		0.172079	0.408752	-0.476648	0.218567
1461	0.29336	0.195696	-0.324459	0.151615		0.171629	0.409766	-0.477525	0.218915
1462	0.293683	0.195412	-0.323405	0.151227		0.17118	0.410773	-0.478409	0.219255
1463	0.294016	0.195117	-0.322341	0.150838		0.170734	0.411773	-0.479302	0.219587
1464	0.294359	0.194812	-0.321269	0.150448		0.170289	0.412766	-0.480203	0.219912
1465	0.294712	0.194497	-0.320189	0.150059		0.169845	0.413751	-0.48111	0.22023
1466	0.295075	0.194174	-0.319103	0.149669		0.169403	0.414728	-0.482025	0.22054
1467	0.295448	0.193842	-0.318012	0.14928		0.168962	0.415696	-0.482947	0.220845
1468	0.29583	0.193503	-0.316917	0.148891		0.168522	0.416655	-0.483875	0.221144
1469	0.296223	0.193157	-0.315819	0.148503		0.168083	0.417605	-0.484809	0.221437
1470	0.296626	0.192805	-0.314719	0.148116		0.167645	0.418546	-0.485748	0.221726
1471	0.297039	0.192447	-0.313618	0.147731		0.167208	0.419477	-0.486693	0.22201
1472	0.297463	0.192084	-0.312517	0.147347		0.166772	0.420397	-0.487643	0.222291
1473	0.297897	0.191717	-0.311416	0.146964		0.166337	0.421307	-0.488598	0.222568
1474	0.298343	0.191346	-0.310317	0.146584		0.165903	0.422206	-0.489557	0.222842
1475	0.298799	0.190972	-0.30922	0.146207		0.165471	0.423094	-0.49052	0.223114
1476	0.299267	0.190596	-0.308126	0.145832		0.165039	0.42397	-0.491487	0.223383
1477	0.299747	0.190217	-0.307035	0.14546		0.164609	0.424835	-0.492457	0.223652
1478	0.300239	0.189838	-0.305948	0.145091		0.164181	0.425687	-0.49343	0.223919
1479	0.300744	0.189457	-0.304867	0.144725		0.163754	0.426527	-0.494405	0.224186
1480	0.301261	0.189077	-0.30379	0.144363		0.163329	0.427354	-0.495382	0.224453
1481	0.301793	0.188696	-0.302719	0.144005		0.162907	0.428168	-0.496361	0.224721
1482	0.302338	0.188317	-0.301654	0.143651		0.162487	0.428968	-0.497342	0.22499
1483	0.302898	0.187939	-0.300596	0.143302		0.162069	0.429755	-0.498322	0.22526
1484	0.303473	0.187563	-0.299544	0.142957		0.161654	0.430528	-0.499303	0.225532
1485	0.304062	0.187189	-0.2985	0.142617		0.161242	0.431286	-0.500284	0.225806
1486	0.304668	0.186818	-0.297463	0.142282		0.160833	0.43203	-0.501263	0.226084
1487	0.305289	0.186451	-0.296433	0.141952		0.160427	0.432759	-0.502242	0.226365
1488	0.305927	0.186088	-0.295412	0.141627		0.160025	0.433473	-0.503218	0.22665
1489	0.306581	0.185729	-0.294398	0.141308		0.159627	0.434171	-0.504191	0.226939
1490	0.307252	0.185375	-0.293393	0.140994		0.159233	0.434854	-0.505162	0.227232
1491	0.30794	0.185027	-0.292396	0.140687		0.158843	0.435521	-0.506129	0.227531
1492	0.308645	0.184685	-0.291407	0.140385		0.158457	0.436171	-0.507092	0.227836
1493	0.309367	0.184349	-0.290426	0.14009		0.158077	0.436804	-0.508049	0.228146
1494	0.310106	0.18402	-0.289454	0.1398		0.157702	0.437421	-0.509002	0.228462
1495	0.310863	0.183699	-0.28849	0.139518		0.157332	0.438021	-0.509948	0.228785
1496	0.311637	0.183385	-0.287533	0.139241		0.156969	0.438603	-0.510888	0.229115
1497	0.312429	0.183081	-0.286585	0.138971		0.156611	0.439168	-0.51182	0.229451
1498	0.313238	0.182785	-0.285644	0.138708		0.156261	0.439715	-0.512745	0.229795
1499	0.314064	0.182498	-0.284709	0.138451		0.155917	0.440244	-0.513661	0.230147
1500	0.314908	0.182221	-0.283782	0.1382		0.155581	0.440754	-0.514568	0.230506
1501	0.315768	0.181954	-0.282861	0.137957		0.155253	0.441246	-0.515466	0.230874
1502	0.316646	0.181698	-0.281946	0.137719		0.154933	0.441719	-0.516353	0.231249
1503	0.31754	0.181453	-0.281036	0.137489		0.154621	0.442174	-0.517229	0.231633
1504	0.318451	0.181219	-0.280131	0.137264		0.154319	0.442609	-0.518094	0.232025
1505	0.319378	0.180997	-0.279231	0.137046		0.154026	0.443025	-0.518947	0.232426
1506	0.32032	0.180787	-0.278335	0.136835		0.153742	0.443421	-0.519788	0.232836
1507	0.321279	0.18059	-0.277442	0.136629		0.153469	0.443798	-0.520615	0.233254
1508	0.322252	0.180405	-0.276552	0.13643		0.153207	0.444155	-0.521429	0.233681
1509	0.32324	0.180234	-0.275665	0.136237		0.152956	0.444492	-0.522229	0.234117
1510	0.324243	0.180076	-0.274779	0.13605		0.152716	0.444809	-0.523015	0.234562
1511	0.325259	0.179932	-0.273895	0.135868		0.152487	0.445106	-0.523786	0.235015
1512	0.326287	0.179802	-0.273011	0.135692		0.152271	0.445382	-0.524542	0.235477
1513	0.327329	0.179686	-0.272128	0.135522		0.152067	0.445638	-0.525282	0.235949
1514	0.328382	0.179585	-0.271244	0.135357		0.151875	0.445874	-0.526006	0.236429
1515	0.329446	0.179497	-0.27036	0.135198		0.151696	0.446089	-0.526714	0.236917
1516	0.33052	0.179425	-0.269475	0.135044		0.15153	0.446284	-0.527406	0.237415
1517	0.331603	0.179367	-0.268587	0.134895		0.151378	0.446458	-0.528081	0.237921
1518	0.332695	0.179325	-0.267698	0.13475		0.151239	0.446612	-0.528739	0.238435
1519	0.333794	0.179297	-0.266805	0.134611		0.151114	0.446745	-0.52938	0.238958
1520	0.3349	0.179284	-0.26591	0.134476		0.151003	0.446858	-0.530003	0.23949
1521	0.336011	0.179286	-0.265011	0.134346		0.150906	0.44695	-0.530609	0.24003
1522	0.337127	0.179304	-0.264108	0.134221		0.150823	0.447023	-0.531198	0.240578
1523	0.338246	0.179336	-0.263201	0.1341		0.150755	0.447075	-0.531768	0.241135
1524	0.339368	0.179383	-0.262289	0.133983		0.150701	0.447107	-0.532321	0.241699
1525	0.340491	0.179445	-0.261372	0.133871		0.150662	0.447119	-0.532856	0.242271
1526	0.341614	0.179522	-0.26045	0.133763		0.150637	0.447112	-0.533373	0.242851
1527	0.342736	0.179614	-0.259523	0.133659		0.150628	0.447085	-0.533872	0.243439
1528	0.343856	0.17972	-0.258591	0.133559		0.150633	0.447039	-0.534352	0.244034
1529	0.344973	0.179841	-0.257653	0.133464		0.150653	0.446973	-0.534815	0.244636
1530	0.346085	0.179976	-0.25671	0.133373		0.150689	0.446888	-0.535259	0.245244
1531	0.347191	0.180125	-0.255762	0.133286		0.150739	0.446784	-0.535685	0.24586
1532	0.348291	0.180287	-0.254809	0.133203		0.150805	0.446661	-0.536093	0.246482
1533	0.349383	0.180464	-0.25385	0.133125		0.150886	0.446519	-0.536482	0.24711
1534	0.350466	0.180654	-0.252886	0.133052		0.150983	0.446359	-0.536853	0.247744
1535	0.351539	0.180857	-0.251917	0.132983		0.151095	0.44618	-0.537206	0.248383
1536	0.3526	0.181072	-0.250943	0.132919		0.151222	0.445983	-0.537541	0.249028
1537	0.353649	0.181301	-0.249965	0.13286		0.151366	0.445768	-0.537858	0.249678
1538	0.354685	0.181541	-0.248982	0.132806		0.151525	0.445534	-0.538156	0.250333
1539	0.355706	0.181793	-0.247994	0.132758		0.1517	0.445283	-0.538437	0.250991
1540	0.356712	0.182056	-0.247003	0.132715		0.151891	0.445014	-0.5387	0.251654
1541	0.357702	0.18233	-0.246008	0.132679		0.152097	0.444728	-0.538945	0.25232
1542	0.358675	0.182615	-0.245009	0.132649		0.15232	0.444424	-0.539173	0.25299
1543	0.35963	0.182909	-0.244007	0.132625		0.152559	0.444102	-0.539383	0.253663
1544	0.360566	0.183212	-0.243001	0.132608		0.152814	0.443764	-0.539577	0.254338
1545	0.361483	0.183525	-0.241993	0.132598		0.153085	0.443408	-0.539753	0.255015
1546	0.362379	0.183845	-0.240982	0.132596		0.153371	0.443035	-0.539912	0.255694
1547	0.363255	0.184174	-0.239969	0.132601		0.153674	0.442645	-0.540054	0.256374
1548	0.36411	0.184509	-0.238953	0.132615		0.153992	0.442239	-0.54018	0.257055
1549	0.364944	0.184851	-0.237935	0.132637		0.154327	0.441815	-0.540289	0.257737
1550	0.365755	0.185199	-0.236916	0.132667		0.154677	0.441375	-0.540383	0.258418
1551	0.366545	0.185552	-0.235894	0.132707		0.155043	0.440918	-0.54046	0.259099
1552	0.367312	0.18591	-0.234872	0.132757		0.155424	0.440445	-0.540522	0.259779
1553	0.368057	0.186272	-0.233847	0.132816		0.15582	0.439955	-0.540568	0.260457
1554	0.36878	0.186638	-0.232821	0.132885		0.156232	0.439448	-0.5406	0.261133
1555	0.36948	0.187006	-0.231794	0.132965		0.156659	0.438925	-0.540616	0.261806
1556	0.370157	0.187376	-0.230766	0.133056		0.1571	0.438385	-0.540618	0.262476
1557	0.370813	0.187748	-0.229737	0.133158		0.157556	0.437829	-0.540605	0.263142
1558	0.371447	0.18812	-0.228707	0.133271		0.158026	0.437256	-0.540578	0.263803
1559	0.372059	0.188493	-0.227676	0.133396		0.158511	0.436667	-0.540538	0.264459
1560	0.372649	0.188865	-0.226644	0.133534		0.159008	0.436062	-0.540484	0.26511
1561	0.373219	0.189236	-0.225611	0.133683		0.15952	0.435441	-0.540416	0.265755
1562	0.373767	0.189605	-0.224578	0.133845		0.160044	0.434804	-0.540335	0.266393
1563	0.374296	0.189972	-0.223545	0.134019		0.160581	0.43415	-0.540242	0.267023
1564	0.374805	0.190336	-0.22251	0.134206		0.16113	0.433481	-0.540136	0.267646
1565	0.375294	0.190696	-0.221476	0.134406		0.161691	0.432795	-0.540018	0.26826
1566	0.375765	0.191052	-0.220441	0.134618		0.162264	0.432094	-0.539887	0.268866
1567	0.376217	0.191404	-0.219406	0.134843		0.162849	0.431377	-0.539745	0.269462
1568	0.376651	0.19175	-0.218371	0.135081		0.163444	0.430644	-0.539592	0.270048
1569	0.377068	0.192091	-0.217336	0.135332		0.16405	0.429895	-0.539427	0.270624
1570	0.377468	0.192426	-0.216301	0.135595		0.164666	0.429131	-0.539251	0.271189
1571	0.377852	0.192755	-0.215266	0.135871		0.165292	0.428352	-0.539064	0.271743
1572	0.378221	0.193076	-0.214231	0.136158		0.165929	0.427557	-0.538866	0.272284
1573	0.378574	0.193391	-0.213197	0.136458		0.166574	0.426747	-0.538657	0.272814
1574	0.378913	0.193698	-0.212163	0.136769		0.167228	0.425922	-0.538438	0.27333
1575	0.379237	0.193997	-0.211129	0.137092		0.167891	0.425082	-0.538209	0.273834
1576	0.379549	0.194288	-0.210095	0.137426		0.168563	0.424227	-0.537968	0.274324
1577	0.379847	0.19457	-0.209063	0.13777		0.169242	0.423358	-0.537718	0.2748
1578	0.380134	0.194845	-0.20803	0.138125		0.16993	0.422474	-0.537457	0.275261
1579	0.380408	0.19511	-0.206999	0.138489		0.170624	0.421576	-0.537186	0.275708
1580	0.380671	0.195366	-0.205969	0.138862		0.171327	0.420665	-0.536904	0.27614
1581	0.380924	0.195614	-0.204939	0.139245		0.172036	0.419739	-0.536612	0.276557
1582	0.381166	0.195852	-0.203911	0.139635		0.172752	0.418801	-0.53631	0.276957
1583	0.381398	0.196081	-0.202885	0.140032		0.173474	0.417849	-0.535998	0.277342
1584	0.381621	0.1963	-0.20186	0.140437		0.174203	0.416884	-0.535675	0.27771
1585	0.381835	0.196511	-0.200838	0.140848		0.174939	0.415907	-0.535341	0.278061
1586	0.382041	0.196711	-0.199818	0.141265		0.17568	0.414918	-0.534997	0.278395
1587	0.382238	0.196903	-0.1988	0.141687		0.176428	0.413917	-0.534643	0.278712
1588	0.382427	0.197085	-0.197786	0.142114		0.177181	0.412904	-0.534277	0.279011
1589	0.382609	0.197258	-0.196774	0.142545		0.17794	0.41188	-0.533902	0.279292
1590	0.382783	0.197421	-0.195767	0.142979		0.178704	0.410846	-0.533515	0.279554
1591	0.382951	0.197575	-0.194763	0.143416		0.179475	0.409801	-0.533117	0.279798
1592	0.383111	0.19772	-0.193764	0.143855		0.18025	0.408746	-0.532709	0.280023
1593	0.383265	0.197856	-0.19277	0.144297		0.181031	0.407681	-0.532289	0.280228
1594	0.383413	0.197984	-0.191781	0.144739		0.181817	0.406607	-0.531858	0.280414
1595	0.383554	0.198102	-0.190797	0.145182		0.182608	0.405524	-0.531416	0.28058
1596	0.383688	0.198212	-0.18982	0.145625		0.183404	0.404433	-0.530962	0.280727
1597	0.383817	0.198313	-0.18885	0.146069		0.184205	0.403334	-0.530496	0.280853
1598	0.383939	0.198406	-0.187887	0.146511		0.185011	0.402228	-0.530018	0.280958
1599	0.384055	0.198491	-0.186931	0.146952		0.185821	0.401114	-0.529528	0.281043
1600	0.384164	0.198568	-0.185985	0.147392		0.186636	0.399994	-0.529026	0.281108
1601	0.384267	0.198638	-0.185047	0.14783		0.187455	0.398867	-0.528512	0.281151
1602	0.384364	0.1987	-0.184119	0.148266		0.188278	0.397735	-0.527985	0.281173
1603	0.384453	0.198755	-0.183202	0.148699		0.189105	0.396598	-0.527445	0.281173
1604	0.384536	0.198803	-0.182296	0.149129		0.189935	0.395455	-0.526892	0.281152
1605	0.384612	0.198845	-0.181403	0.149556		0.190769	0.394308	-0.526327	0.28111
1606	0.38468	0.19888	-0.180522	0.14998		0.191606	0.393158	-0.525748	0.281046
1607	0.384742	0.198909	-0.179655	0.1504		0.192445	0.392004	-0.525156	0.28096
1608	0.384795	0.198931	-0.178802	0.150816		0.193288	0.390846	-0.524551	0.280852
1609	0.384842	0.198948	-0.177965	0.151228		0.194133	0.389687	-0.523932	0.280722
1610	0.38488	0.198959	-0.177145	0.151636		0.194981	0.388525	-0.5233	0.280571
1611	0.38491	0.198964	-0.176341	0.15204		0.19583	0.387362	-0.522655	0.280397
1612	0.384933	0.198965	-0.175556	0.152439		0.196682	0.386198	-0.521996	0.280201
1613	0.384947	0.19896	-0.174789	0.152833		0.197535	0.385033	-0.521323	0.279983
1614	0.384953	0.19895	-0.174043	0.153223		0.198389	0.383868	-0.520636	0.279743
1615	0.384951	0.198935	-0.173317	0.153608		0.199244	0.382704	-0.519935	0.27948
1616	0.38494	0.198916	-0.172614	0.153988		0.2001	0.381542	-0.51922	0.279195
1617	0.384921	0.198892	-0.171933	0.154363		0.200957	0.380381	-0.518491	0.278888
1618	0.384893	0.198865	-0.171275	0.154733		0.201814	0.379222	-0.517747	0.278559
1619	0.384856	0.198833	-0.170643	0.155099		0.202671	0.378066	-0.516989	0.278208
1620	0.384811	0.198797	-0.170036	0.15546		0.203528	0.376913	-0.516217	0.277834
1621	0.384758	0.198758	-0.169455	0.155815		0.204384	0.375765	-0.51543	0.277438
1622	0.384695	0.198715	-0.168902	0.156167		0.205239	0.374621	-0.514629	0.27702
1623	0.384625	0.198669	-0.168377	0.156513		0.206093	0.373482	-0.513813	0.276579
1624	0.384546	0.19862	-0.167881	0.156855		0.206946	0.372348	-0.512982	0.276117
1625	0.384459	0.198568	-0.167415	0.157193		0.207796	0.37122	-0.512136	0.275633
1626	0.384364	0.198513	-0.16698	0.157527		0.208644	0.3701	-0.511276	0.275127
1627	0.384261	0.198456	-0.166577	0.157856		0.209489	0.368986	-0.510401	0.274599
1628	0.384151	0.198396	-0.166206	0.158182		0.21033	0.367879	-0.509511	0.27405
1629	0.384033	0.198334	-0.165869	0.158505		0.211167	0.366781	-0.508606	0.273479
1630	0.383909	0.19827	-0.165565	0.158824		0.212	0.365692	-0.507685	0.272886
1631	0.383778	0.198204	-0.165295	0.15914		0.212828	0.364611	-0.50675	0.272273
1632	0.383641	0.198137	-0.165061	0.159453		0.213651	0.36354	-0.5058	0.271638
1633	0.383498	0.198068	-0.164862	0.159763		0.214467	0.362479	-0.504835	0.270982
1634	0.38335	0.197999	-0.164699	0.160072		0.215276	0.361429	-0.503854	0.270306
1635	0.383197	0.197928	-0.164573	0.160378		0.216078	0.360389	-0.502858	0.269608
1636	0.383039	0.197857	-0.164484	0.160683		0.216871	0.359361	-0.501847	0.26889
1637	0.382878	0.197785	-0.164432	0.160986		0.217655	0.358345	-0.50082	0.268152
1638	0.382713	0.197713	-0.164418	0.161289		0.21843	0.357341	-0.499779	0.267393
1639	0.382545	0.197642	-0.164442	0.16159		0.219194	0.35635	-0.498722	0.266615
1640	0.382375	0.19757	-0.164504	0.161892		0.219947	0.355372	-0.497649	0.265816
1641	0.382204	0.1975	-0.164605	0.162194		0.220687	0.354407	-0.496562	0.264998
1642	0.382031	0.197429	-0.164745	0.162496		0.221414	0.353456	-0.495459	0.26416
1643	0.381859	0.19736	-0.164923	0.162798		0.222128	0.352519	-0.494342	0.263303
1644	0.381686	0.197293	-0.165141	0.163102		0.222826	0.351596	-0.493209	0.262426
1645	0.381515	0.197226	-0.165397	0.163407		0.223508	0.350689	-0.492062	0.261531
1646	0.381346	0.197161	-0.165692	0.163714		0.224174	0.349796	-0.4909	0.260616
1647	0.381179	0.197098	-0.166025	0.164023		0.224821	0.348919	-0.489723	0.259683
1648	0.381015	0.197037	-0.166397	0.164333		0.225449	0.348057	-0.488532	0.258731
1649	0.380855	0.196978	-0.166807	0.164646		0.226058	0.347211	-0.487326	0.257761
1650	0.380699	0.196921	-0.167256	0.164961		0.226645	0.346382	-0.486106	0.256772
1651	0.380549	0.196866	-0.167742	0.165279		0.22721	0.345568	-0.484872	0.255766
1652	0.380404	0.196814	-0.168266	0.1656		0.227751	0.344772	-0.483624	0.254743
1653	0.380265	0.196764	-0.168827	0.165923		0.228269	0.343992	-0.482361	0.253702
1654	0.380133	0.196717	-0.169424	0.16625		0.228761	0.343229	-0.481085	0.252644
1655	0.380007	0.196672	-0.170059	0.166579		0.229226	0.342484	-0.479796	0.251569
1656	0.37989	0.196629	-0.170728	0.166912		0.229664	0.341755	-0.478493	0.250478
1657	0.37978	0.196589	-0.171434	0.167248		0.230073	0.341045	-0.477177	0.249371
1658	0.379679	0.196552	-0.172174	0.167587		0.230453	0.340352	-0.475848	0.248249
1659	0.379586	0.196517	-0.172949	0.167929		0.230802	0.339676	-0.474507	0.247111
1660	0.379502	0.196483	-0.173757	0.168274		0.231119	0.339019	-0.473153	0.245959
1661	0.379427	0.196452	-0.174598	0.168623		0.231403	0.338379	-0.471787	0.244792
1662	0.379362	0.196423	-0.175471	0.168975		0.231653	0.337757	-0.47041	0.243612
1663	0.379305	0.196396	-0.176376	0.169331		0.231869	0.337153	-0.469021	0.242419
1664	0.379258	0.19637	-0.177312	0.169689		0.232048	0.336567	-0.467621	0.241212
1665	0.37922	0.196346	-0.178277	0.170051		0.232191	0.335999	-0.466211	0.239994
1666	0.37919	0.196323	-0.179272	0.170416		0.232296	0.335449	-0.46479	0.238764
1667	0.37917	0.196301	-0.180294	0.170783		0.232362	0.334917	-0.463358	0.237522
1668	0.379158	0.196279	-0.181345	0.171154		0.232389	0.334402	-0.461918	0.236271
1669	0.379154	0.196259	-0.182421	0.171527		0.232375	0.333905	-0.460467	0.235009
1670	0.379157	0.196238	-0.183523	0.171903		0.23232	0.333426	-0.459008	0.233738
1671	0.379169	0.196218	-0.18465	0.172281		0.232222	0.332965	-0.45754	0.232458
1672	0.379187	0.196197	-0.1858	0.172661		0.232082	0.332521	-0.456063	0.231171
1673	0.379212	0.196176	-0.186974	0.173044		0.231898	0.332095	-0.454579	0.229876
1674	0.379243	0.196154	-0.188169	0.173428		0.231669	0.331685	-0.453088	0.228575
1675	0.379279	0.196131	-0.189385	0.173814		0.231396	0.331293	-0.451589	0.227267
1676	0.37932	0.196107	-0.19062	0.174202		0.231077	0.330919	-0.450084	0.225955
1677	0.379366	0.196082	-0.191875	0.174591		0.230711	0.330561	-0.448574	0.224638
1678	0.379415	0.196055	-0.193148	0.174981		0.230299	0.330219	-0.447057	0.223317
1679	0.379466	0.196026	-0.194438	0.175372		0.22984	0.329895	-0.445536	0.221994
1680	0.37952	0.195996	-0.195744	0.175763		0.229333	0.329587	-0.444011	0.220668
1681	0.379574	0.195963	-0.197065	0.176155		0.228778	0.329296	-0.442482	0.219342
1682	0.379629	0.195928	-0.1984	0.176547		0.228175	0.32902	-0.44095	0.218015
1683	0.379682	0.19589	-0.199748	0.176938		0.227523	0.328761	-0.439414	0.216688
1684	0.379734	0.19585	-0.201108	0.177329		0.226822	0.328518	-0.437877	0.215362
1685	0.379783	0.195808	-0.20248	0.17772		0.226073	0.328291	-0.436337	0.214039
1686	0.379827	0.195762	-0.203862	0.178109		0.225274	0.328079	-0.434797	0.212719
1687	0.379867	0.195713	-0.205253	0.178498		0.224426	0.327884	-0.433255	0.211402
1688	0.3799	0.195662	-0.206653	0.178885		0.223528	0.327703	-0.431713	0.21009
1689	0.379926	0.195607	-0.20806	0.17927		0.222582	0.327538	-0.430171	0.208783
1690	0.379944	0.19555	-0.209475	0.179653		0.221585	0.327388	-0.42863	0.207483
1691	0.379951	0.195489	-0.210895	0.180034		0.22054	0.327253	-0.427089	0.206189
1692	0.379948	0.195424	-0.212321	0.180413		0.219445	0.327132	-0.425551	0.204904
1693	0.379933	0.195356	-0.213751	0.180788		0.218301	0.327027	-0.424015	0.203628
1694	0.379905	0.195285	-0.215186	0.181161		0.217108	0.326936	-0.422481	0.20236
1695	0.379863	0.195211	-0.216623	0.181531		0.215867	0.326859	-0.420951	0.201103
1696	0.379804	0.195133	-0.218063	0.181897		0.214577	0.326796	-0.419425	0.199857
1697	0.37973	0.195051	-0.219505	0.182259		0.213238	0.326748	-0.417903	0.198623
1698	0.379637	0.194966	-0.220948	0.182618		0.211852	0.326713	-0.416386	0.197401
1699	0.379525	0.194878	-0.222392	0.182972		0.210418	0.326692	-0.414876	0.196192
1700	0.379394	0.194786	-0.223836	0.183321		0.208938	0.326685	-0.413372	0.194997
1701	0.379242	0.19469	-0.225279	0.183666		0.20741	0.326691	-0.411875	0.193815
1702	0.379068	0.194591	-0.226721	0.184006		0.205837	0.32671	-0.410387	0.192649
1703	0.378871	0.194489	-0.228162	0.18434		0.204218	0.326742	-0.408907	0.191498
1704	0.378651	0.194384	-0.2296	0.184669		0.202554	0.326787	-0.407437	0.190363
1705	0.378406	0.194275	-0.231035	0.184992		0.200847	0.326844	-0.405977	0.189244
1706	0.378137	0.194163	-0.232467	0.185309		0.199096	0.326914	-0.404528	0.188142
1707	0.377841	0.194047	-0.233895	0.18562		0.197303	0.326996	-0.403092	0.187058
1708	0.377519	0.193929	-0.235319	0.185925		0.195469	0.32709	-0.401668	0.185991
1709	0.37717	0.193807	-0.236738	0.186222		0.193595	0.327197	-0.400258	0.184942
1710	0.376794	0.193682	-0.238152	0.186514		0.191683	0.327314	-0.398863	0.183913
1711	0.37639	0.193554	-0.239559	0.186798		0.189732	0.327444	-0.397483	0.182902
1712	0.375958	0.193424	-0.240961	0.187075		0.187746	0.327584	-0.39612	0.18191
1713	0.375497	0.19329	-0.242355	0.187345		0.185725	0.327736	-0.394775	0.180938
1714	0.375007	0.193154	-0.243743	0.187608		0.183671	0.327898	-0.393448	0.179986
1715	0.374489	0.193014	-0.245122	0.187863		0.181585	0.328071	-0.392141	0.179054
1716	0.373941	0.192872	-0.246493	0.188111		0.179469	0.328255	-0.390855	0.178143
1717	0.373365	0.192728	-0.247856	0.188351		0.177325	0.328449	-0.389591	0.177252
1718	0.37276	0.192581	-0.249209	0.188584		0.175155	0.328652	-0.38835	0.176383
1719	0.372126	0.192431	-0.250553	0.188809		0.17296	0.328865	-0.387132	0.175534
1720	0.371464	0.192279	-0.251887	0.189026		0.170742	0.329088	-0.385941	0.174706
1721	0.370773	0.192125	-0.253209	0.189236		0.168504	0.32932	-0.384775	0.1739
1722	0.370055	0.191969	-0.254521	0.189438		0.166247	0.329561	-0.383637	0.173116
1723	0.369309	0.19181	-0.25582	0.189632		0.163973	0.32981	-0.382528	0.172353
1724	0.368537	0.19165	-0.257108	0.189818		0.161685	0.330067	-0.381449	0.171612
1725	0.367738	0.191488	-0.258382	0.189998		0.159384	0.330333	-0.380401	0.170893
1726	0.366913	0.191324	-0.259643	0.190169		0.157073	0.330606	-0.379385	0.170196
1727	0.366064	0.191158	-0.260889	0.190334		0.154754	0.330887	-0.378402	0.169521
1728	0.36519	0.190991	-0.262121	0.190491		0.15243	0.331175	-0.377454	0.168869
1729	0.364292	0.190822	-0.263337	0.190641		0.150101	0.33147	-0.37654	0.168238
1730	0.363372	0.190652	-0.264537	0.190784		0.147771	0.331771	-0.375664	0.167629
1731	0.36243	0.190481	-0.26572	0.19092		0.145443	0.332079	-0.374824	0.167043
1732	0.361467	0.190309	-0.266886	0.19105		0.143117	0.332392	-0.374022	0.166479
1733	0.360485	0.190135	-0.268033	0.191173		0.140798	0.332712	-0.37326	0.165936
1734	0.359483	0.189961	-0.269162	0.19129		0.138486	0.333037	-0.372537	0.165416
1735	0.358465	0.189786	-0.270272	0.191401		0.136185	0.333368	-0.371854	0.164918
1736	0.357429	0.18961	-0.271361	0.191506		0.133897	0.333703	-0.371212	0.164441
1737	0.356379	0.189434	-0.27243	0.191605		0.131624	0.334043	-0.370612	0.163985
1738	0.355314	0.189258	-0.273477	0.191699		0.129368	0.334388	-0.370055	0.163551
1739	0.354237	0.189081	-0.274502	0.191788		0.127132	0.334738	-0.369539	0.163138
1740	0.353148	0.188904	-0.275505	0.191871		0.124919	0.335091	-0.369067	0.162746
1741	0.35205	0.188728	-0.276485	0.19195		0.122731	0.335449	-0.368639	0.162374
1742	0.350942	0.188551	-0.27744	0.192025		0.120569	0.33581	-0.368254	0.162023
1743	0.349828	0.188375	-0.278371	0.192094		0.118437	0.336175	-0.367913	0.161691
1744	0.348707	0.188199	-0.279277	0.19216		0.116337	0.336543	-0.367617	0.161379
1745	0.347582	0.188024	-0.280158	0.192221		0.114271	0.336915	-0.367366	0.161086
1746	0.346455	0.187849	-0.281012	0.192279		0.112242	0.337289	-0.36716	0.160812
1747	0.345325	0.187675	-0.281839	0.192333		0.110252	0.337667	-0.366998	0.160555
1748	0.344196	0.187503	-0.282639	0.192383		0.108303	0.338047	-0.366882	0.160317
1749	0.343067	0.187331	-0.283411	0.192429		0.106398	0.33843	-0.36681	0.160096
1750	0.341942	0.18716	-0.284155	0.192473		0.104539	0.338816	-0.366784	0.159892
1751	0.34082	0.18699	-0.284869	0.192513		0.102727	0.339204	-0.366803	0.159704
1752	0.339704	0.186821	-0.285554	0.192549		0.100966	0.339594	-0.366866	0.159532
1753	0.338595	0.186654	-0.286208	0.192583		0.0992578	0.339987	-0.366975	0.159375
1754	0.337494	0.186488	-0.286832	0.192614		0.0976038	0.340383	-0.367128	0.159233
1755	0.336402	0.186323	-0.287425	0.192642		0.0960062	0.34078	-0.367326	0.159105
1756	0.335321	0.18616	-0.287986	0.192667		0.0944671	0.34118	-0.367568	0.158991
1757	0.334252	0.185998	-0.288515	0.19269		0.0929885	0.341583	-0.367853	0.158889
1758	0.333196	0.185838	-0.289011	0.192711		0.0915722	0.341987	-0.368183	0.158801
1759	0.332155	0.185679	-0.289475	0.192729		0.09022	0.342395	-0.368555	0.158724
1760	0.331128	0.185521	-0.289905	0.192746		0.0889337	0.342805	-0.36897	0.158658
1761	0.330117	0.185366	-0.290301	0.19276		0.0877149	0.343217	-0.369427	0.158603
1762	0.329123	0.185212	-0.290663	0.192773		0.0865653	0.343632	-0.369926	0.158559
1763	0.328147	0.185059	-0.29099	0.192784		0.0854863	0.344049	-0.370466	0.158523
1764	0.32719	0.184908	-0.291282	0.192794		0.0844794	0.34447	-0.371047	0.158497
1765	0.326251	0.184759	-0.291539	0.192802		0.083546	0.344893	-0.371667	0.158479
1766	0.325332	0.184611	-0.291761	0.19281		0.0826872	0.345319	-0.372327	0.158469
1767	0.324433	0.184465	-0.291948	0.192816		0.0819042	0.345748	-0.373026	0.158466
1768	0.323555	0.18432	-0.292098	0.192822		0.0811982	0.34618	-0.373764	0.15847
1769	0.322698	0.184176	-0.292213	0.192828		0.08057	0.346615	-0.374539	0.158479
1770	0.321863	0.184033	-0.292291	0.192832		0.0800207	0.347054	-0.37535	0.158495
1771	0.321048	0.183892	-0.292333	0.192837		0.079551	0.347496	-0.376199	0.158515
1772	0.320256	0.183752	-0.29234	0.192841		0.0791617	0.347941	-0.377082	0.158539
1773	0.319485	0.183612	-0.29231	0.192845		0.0788534	0.34839	-0.378001	0.158568
1774	0.318736	0.183473	-0.292245	0.19285		0.0786266	0.348843	-0.378954	0.1586
1775	0.318008	0.183335	-0.292144	0.192855		0.078482	0.349299	-0.379941	0.158634
1776	0.317302	0.183196	-0.292007	0.19286		0.0784198	0.34976	-0.380961	0.158671
1777	0.316617	0.183058	-0.291835	0.192866		0.0784403	0.350224	-0.382013	0.15871
1778	0.315954	0.18292	-0.291628	0.192873		0.0785437	0.350693	-0.383097	0.15875
1779	0.31531	0.182781	-0.291387	0.192881		0.0787302	0.351166	-0.384212	0.158791
1780	0.314687	0.182641	-0.291112	0.19289		0.0789997	0.351643	-0.385357	0.158833
1781	0.314083	0.182501	-0.290804	0.192901		0.0793521	0.352125	-0.386533	0.158874
1782	0.313498	0.182359	-0.290463	0.192913		0.0797872	0.352611	-0.387738	0.158915
1783	0.312932	0.182215	-0.29009	0.192927		0.0803046	0.353102	-0.388971	0.158956
1784	0.312383	0.182069	-0.289686	0.192943		0.080904	0.353599	-0.390233	0.158995
1785	0.311851	0.181921	-0.289252	0.192961		0.0815847	0.3541	-0.391523	0.159033
1786	0.311335	0.181771	-0.288788	0.192982		0.0823461	0.354606	-0.39284	0.159069
1787	0.310834	0.181617	-0.288297	0.193005		0.0831874	0.355117	-0.394183	0.159103
1788	0.310348	0.181459	-0.287778	0.193031		0.0841079	0.355633	-0.395553	0.159134
1789	0.309875	0.181298	-0.287233	0.193061		0.0851065	0.356155	-0.396949	0.159162
1790	0.309415	0.181133	-0.286664	0.193094		0.0861822	0.356682	-0.39837	0.159188
1791	0.308966	0.180963	-0.286072	0.19313		0.0873339	0.357214	-0.399816	0.15921
1792	0.308529	0.180788	-0.285458	0.193171		0.0885603	0.357752	-0.401287	0.159228
1793	0.3081	0.180608	-0.284824	0.193217		0.08986	0.358294	-0.402782	0.159243
1794	0.307681	0.180422	-0.28417	0.193267		0.0912317	0.358843	-0.404301	0.159254
1795	0.307269	0.18023	-0.283499	0.193322		0.0926739	0.359396	-0.405845	0.15926
1796	0.306864	0.180031	-0.282813	0.193383		0.094185	0.359955	-0.407412	0.159263
1797	0.306465	0.179825	-0.282112	0.19345		0.0957632	0.360519	-0.409002	0.15926
1798	0.30607	0.179612	-0.281398	0.193523		0.097407	0.361088	-0.410616	0.159254
1799	0.305679	0.179391	-0.280674	0.193604		0.0991144	0.361662	-0.412252	0.159242
1800	0.30529	0.179162	-0.279941	0.193691		0.100884	0.362241	-0.413912	0.159226
1801	0.304902	0.178925	-0.2792	0.193786		0.102713	0.362825	-0.415594	0.159204
1802	0.304515	0.178678	-0.278454	0.193889		0.104599	0.363413	-0.4173	0.159178
1803	0.304127	0.178423	-0.277703	0.194001		0.106542	0.364006	-0.419028	0.159147
1804	0.303736	0.178159	-0.276951	0.194122		0.108537	0.364603	-0.420778	0.159111
1805	0.303343	0.177884	-0.276199	0.194252		0.110584	0.365204	-0.422551	0.159069
1806	0.302946	0.1776	-0.275448	0.194392		0.11268	0.365809	-0.424347	0.159023
1807	0.302543	0.177306	-0.2747	0.194543		0.114821	0.366418	-0.426166	0.158972
1808	0.302133	0.177002	-0.273958	0.194704		0.117007	0.36703	-0.428008	0.158916
1809	0.301716	0.176687	-0.273223	0.194876		0.119234	0.367645	-0.429873	0.158855
1810	0.30129	0.176362	-0.272497	0.195059		0.1215	0.368263	-0.431762	0.158789
1811	0.300854	0.176026	-0.271782	0.195255		0.123802	0.368883	-0.433674	0.158718
1812	0.300406	0.175679	-0.271079	0.195463		0.126137	0.369506	-0.43561	0.158643
1813	0.299947	0.175322	-0.270391	0.195683		0.128504	0.370131	-0.43757	0.158563
1814	0.299473	0.174953	-0.269718	0.195917		0.130898	0.370758	-0.439554	0.15848
1815	0.298985	0.174575	-0.269064	0.196164		0.133317	0.371386	-0.441563	0.158392
1816	0.29848	0.174185	-0.268429	0.196424		0.135758	0.372015	-0.443597	0.1583
1817	0.297958	0.173785	-0.267816	0.196699		0.138218	0.372645	-0.445657	0.158204
1818	0.297418	0.173375	-0.267226	0.196987		0.140695	0.373275	-0.447742	0.158105
1819	0.296858	0.172955	-0.266661	0.19729		0.143184	0.373905	-0.449854	0.158003
1820	0.296277	0.172525	-0.266122	0.197608		0.145682	0.374534	-0.451992	0.157898
1821	0.295674	0.172085	-0.265611	0.197941		0.148187	0.375162	-0.454157	0.157791
1822	0.295048	0.171635	-0.26513	0.198288		0.150695	0.37579	-0.45635	0.157682
1823	0.294396	0.171177	-0.26468	0.198651		0.153203	0.376415	-0.45857	0.15757
1824	0.293719	0.17071	-0.264263	0.19903		0.155706	0.377038	-0.460819	0.157457
1825	0.293015	0.170234	-0.26388	0.199424		0.158203	0.377659	-0.463096	0.157343
1826	0.292282	0.169751	-0.263532	0.199833		0.160688	0.378276	-0.465403	0.157228
1827	0.291519	0.16926	-0.263222	0.200258		0.16316	0.37889	-0.467739	0.157113
1828	0.290726	0.168762	-0.262949	0.200699		0.165613	0.3795	-0.470104	0.156998
1829	0.2899	0.168258	-0.262716	0.201155		0.168045	0.380106	-0.4725	0.156883
1830	0.289041	0.167747	-0.262522	0.201627		0.170451	0.380707	-0.474926	0.15677
1831	0.288148	0.167231	-0.26237	0.202114		0.172829	0.381302	-0.477383	0.156657
1832	0.287219	0.16671	-0.262261	0.202616		0.175175	0.381892	-0.47987	0.156546
1833	0.286253	0.166184	-0.262194	0.203133		0.177485	0.382476	-0.48239	0.156438
1834	0.285248	0.165654	-0.262171	0.203665		0.179756	0.383053	-0.48494	0.156331
1835	0.284205	0.165121	-0.262192	0.204211		0.181984	0.383623	-0.487522	0.156228
1836	0.28312	0.164585	-0.262258	0.204772		0.184167	0.384186	-0.490136	0.156128
1837	0.281994	0.164047	-0.26237	0.205346		0.1863	0.384742	-0.492782	0.156031
1838	0.280825	0.163508	-0.262527	0.205934		0.18838	0.385289	-0.49546	0.155939
1839	0.279611	0.162968	-0.262731	0.206534		0.190405	0.385827	-0.49817	0.155851
1840	0.278353	0.162427	-0.262981	0.207147		0.192371	0.386357	-0.500911	0.155769
1841	0.277047	0.161888	-0.263278	0.207772		0.194276	0.386877	-0.503684	0.155691
1842	0.275695	0.161349	-0.263621	0.208408		0.196116	0.387388	-0.506488	0.155619
1843	0.274293	0.160813	-0.264011	0.209055		0.19789	0.387889	-0.509324	0.155553
1844	0.272842	0.160279	-0.264446	0.209713		0.199594	0.388379	-0.51219	0.155494
1845	0.271341	0.159749	-0.264929	0.210379		0.201225	0.388859	-0.515087	0.155441
1846	0.269788	0.159223	-0.265456	0.211055		0.202782	0.389328	-0.518014	0.155395
1847	0.268182	0.158701	-0.266029	0.211738		0.204263	0.389786	-0.520971	0.155357
1848	0.266523	0.158185	-0.266647	0.212428		0.205665	0.390233	-0.523957	0.155327
1849	0.264811	0.157675	-0.267308	0.213125		0.206986	0.390667	-0.526971	0.155305
1850	0.263043	0.157171	-0.268013	0.213827		0.208225	0.39109	-0.530014	0.155291
1851	0.26122	0.156675	-0.268761	0.214534		0.209379	0.3915	-0.533084	0.155286
1852	0.259341	0.156187	-0.269549	0.215244		0.210447	0.391898	-0.53618	0.15529
1853	0.257406	0.155707	-0.270379	0.215957		0.211428	0.392284	-0.539303	0.155303
1854	0.255415	0.155236	-0.271247	0.216672		0.212321	0.392656	-0.542451	0.155326
1855	0.253366	0.154774	-0.272154	0.217387		0.213125	0.393016	-0.545623	0.155358
1856	0.251259	0.154323	-0.273098	0.218101		0.213838	0.393363	-0.548819	0.1554
1857	0.249095	0.153881	-0.274077	0.218814		0.21446	0.393696	-0.552037	0.155452
1858	0.246874	0.153451	-0.275091	0.219525		0.21499	0.394016	-0.555276	0.155515
1859	0.244595	0.153032	-0.276137	0.220231		0.215428	0.394323	-0.558535	0.155587
1860	0.242258	0.152625	-0.277214	0.220932		0.215774	0.394617	-0.561814	0.155671
1861	0.239864	0.15223	-0.27832	0.221627		0.216027	0.394896	-0.56511	0.155764
1862	0.237413	0.151848	-0.279454	0.222315		0.216187	0.395162	-0.568423	0.155869
1863	0.234904	0.151478	-0.280614	0.222994		0.216255	0.395414	-0.571751	0.155985
1864	0.232339	0.151121	-0.281797	0.223663		0.216231	0.395653	-0.575093	0.156111
1865	0.229718	0.150778	-0.283003	0.224321		0.216116	0.395878	-0.578447	0.156249
1866	0.227042	0.150448	-0.284228	0.224967		0.215909	0.396088	-0.581812	0.156398
1867	0.224311	0.150132	-0.28547	0.225599		0.215613	0.396285	-0.585186	0.156558
1868	0.221525	0.14983	-0.286728	0.226216		0.215227	0.396468	-0.588568	0.156729
1869	0.218687	0.149543	-0.287999	0.226818		0.214753	0.396637	-0.591956	0.156912
1870	0.215796	0.149269	-0.28928	0.227402		0.214192	0.396793	-0.595348	0.157107
1871	0.212854	0.14901	-0.290569	0.227967		0.213546	0.396934	-0.598743	0.157312
1872	0.209863	0.148765	-0.291864	0.228513		0.212816	0.397062	-0.602137	0.15753
1873	0.206822	0.148534	-0.293161	0.229038		0.212005	0.397176	-0.605531	0.157758
1874	0.203735	0.148317	-0.294459	0.229541		0.211114	0.397276	-0.608921	0.157999
1875	0.200601	0.148115	-0.295753	0.23002		0.210145	0.397363	-0.612306	0.158251
1876	0.197424	0.147927	-0.297042	0.230476		0.209101	0.397437	-0.615683	0.158514
1877	0.194204	0.147752	-0.298323	0.230905		0.207985	0.397498	-0.619051	0.158788
1878	0.190945	0.147591	-0.299591	0.231309		0.206799	0.397545	-0.622406	0.159074
1879	0.187647	0.147444	-0.300845	0.231684		0.205547	0.397579	-0.625748	0.159371
1880	0.184313	0.147309	-0.302081	0.232032		0.20423	0.397601	-0.629074	0.15968
1881	0.180946	0.147188	-0.303295	0.232349		0.202853	0.397611	-0.632381	0.159999
1882	0.177549	0.147079	-0.304485	0.232636		0.201418	0.397608	-0.635667	0.160329
1883	0.174123	0.146982	-0.305646	0.232892		0.19993	0.397593	-0.638929	0.16067
1884	0.170673	0.146896	-0.306777	0.233115		0.198391	0.397566	-0.642165	0.161022
1885	0.1672	0.146822	-0.307872	0.233305		0.196807	0.397528	-0.645372	0.161385
1886	0.163709	0.146759	-0.308929	0.233461		0.19518	0.397479	-0.648547	0.161758
1887	0.160203	0.146706	-0.309944	0.233582		0.193515	0.397419	-0.651688	0.162142
1888	0.156685	0.146663	-0.310913	0.233667		0.191816	0.397348	-0.654791	0.162536
1889	0.153159	0.146628	-0.311833	0.233715		0.190087	0.397268	-0.657854	0.16294
1890	0.149629	0.146602	-0.312701	0.233726		0.188333	0.397178	-0.660873	0.163355
1891	0.146099	0.146584	-0.313512	0.233699		0.186558	0.397078	-0.663845	0.163779
1892	0.142573	0.146573	-0.314263	0.233632		0.184768	0.39697	-0.666768	0.164213
1893	0.139055	0.146569	-0.314951	0.233526		0.182966	0.396853	-0.669637	0.164657
1894	0.13555	0.14657	-0.315571	0.23338		0.181158	0.396729	-0.672449	0.165111
1895	0.132062	0.146576	-0.316121	0.233193		0.179348	0.396596	-0.675201	0.165574
1896	0.128595	0.146586	-0.316595	0.232964		0.177541	0.396457	-0.677889	0.166047
1897	0.125155	0.146599	-0.316991	0.232694		0.175743	0.396311	-0.68051	0.166529
1898	0.121745	0.146615	-0.317305	0.23238		0.173958	0.39616	-0.68306	0.16702
1899	0.118372	0.146633	-0.317532	0.232024		0.172192	0.396002	-0.685535	0.16752
1900	0.11504	0.146651	-0.31767	0.231625		0.170449	0.39584	-0.687933	0.16803
1901	0.111755	0.146669	-0.317715	0.231181		0.168735	0.395673	-0.690248	0.168549
1902	0.10852	0.146687	-0.317662	0.230694		0.167055	0.395503	-0.692477	0.169077
1903	0.105342	0.146702	-0.317508	0.230161		0.165414	0.395329	-0.694617	0.169614
1904	0.102227	0.146716	-0.31725	0.229584		0.163818	0.395153	-0.696664	0.17016
1905	0.0991784	0.146725	-0.316884	0.228962		0.162271	0.394975	-0.698613	0.170716
1906	0.096203	0.146731	-0.316406	0.228295		0.160779	0.394795	-0.700462	0.171281
1907	0.093306	0.146732	-0.315813	0.227582		0.159348	0.394615	-0.702207	0.171856
1908	0.0904928	0.146728	-0.315101	0.226824		0.157981	0.394434	-0.703843	0.17244
1909	0.087769	0.146717	-0.314267	0.226019		0.156685	0.394254	-0.705367	0.173033
1910	0.0851401	0.146699	-0.313309	0.225169		0.155465	0.394075	-0.706776	0.173637
1911	0.0826114	0.146674	-0.312222	0.224273		0.154325	0.393897	-0.708067	0.174251
1912	0.0801884	0.146642	-0.311004	0.22333		0.153271	0.393722	-0.709235	0.174875
1913	0.0778765	0.1466	-0.309651	0.222342		0.152308	0.39355	-0.710278	0.17551
1914	0.0756809	0.146551	-0.308161	0.221307		0.151441	0.393381	-0.711191	0.176155
1915	0.0736068	0.146492	-0.306532	0.220227		0.150674	0.393217	-0.711973	0.176812
1916	0.0716592	0.146424	-0.304759	0.2191		0.150012	0.393058	-0.71262	0.17748
1917	0.0698432	0.146347	-0.302842	0.217927		0.14946	0.392904	-0.713129	0.17816
1918	0.0681635	0.14626	-0.300777	0.216709		0.149023	0.392757	-0.713497	0.178851
1919	0.066625	0.146164	-0.298562	0.215445		0.148704	0.392617	-0.713722	0.179555
1920	0.0652321	0.146059	-0.296194	0.214136		0.148507	0.392484	-0.713802	0.180272
1921	0.0639893	0.145944	-0.293673	0.212781		0.148437	0.39236	-0.713733	0.181002
1922	0.0629008	0.145821	-0.290996	0.211381		0.148498	0.392245	-0.713514	0.181745
1923	0.0619709	0.145689	-0.288161	0.209937		0.148693	0.392139	-0.713144	0.182501
1924	0.0612032	0.145549	-0.285167	0.208448		0.149025	0.392044	-0.71262	0.183272
1925	0.0606015	0.145402	-0.282013	0.206915		0.149499	0.391959	-0.71194	0.184057
1926	0.0601692	0.145248	-0.278697	0.205339		0.150116	0.391886	-0.711104	0.184858
1927	0.0599095	0.145088	-0.275218	0.203719		0.150881	0.391825	-0.71011	0.185673
1928	0.0598253	0.144922	-0.271577	0.202057		0.151795	0.391777	-0.708957	0.186504
1929	0.0599193	0.144752	-0.267771	0.200352		0.152862	0.391742	-0.707644	0.18735
1930	0.060194	0.144578	-0.263802	0.198605		0.154083	0.39172	-0.706172	0.188213
1931	0.0606516	0.144402	-0.259668	0.196818		0.15546	0.391713	-0.704539	0.189092
1932	0.0612939	0.144225	-0.25537	0.194989		0.156996	0.39172	-0.702745	0.189987
1933	0.0621228	0.144047	-0.250909	0.193121		0.158692	0.391743	-0.700791	0.190899
1934	0.0631395	0.143871	-0.246285	0.191214		0.160549	0.391781	-0.698676	0.191828
1935	0.0643452	0.143697	-0.2415	0.189269		0.162568	0.391835	-0.696402	0.192774
1936	0.0657408	0.143528	-0.236553	0.187286		0.16475	0.391906	-0.693969	0.193737
1937	0.0673267	0.143363	-0.231446	0.185267		0.167096	0.391993	-0.691379	0.194717
1938	0.0691034	0.143206	-0.226182	0.183211		0.169606	0.392097	-0.688632	0.195713
1939	0.0710708	0.143058	-0.220762	0.181122		0.17228	0.392219	-0.68573	0.196726
1940	0.0732285	0.142919	-0.215188	0.178998		0.175117	0.392358	-0.682675	0.197755
1941	0.0755761	0.142793	-0.209463	0.176842		0.178117	0.392515	-0.679468	0.198801
1942	0.0781126	0.14268	-0.203589	0.174654		0.18128	0.392689	-0.676113	0.199861
1943	0.0808369	0.142583	-0.197568	0.172436		0.184604	0.392882	-0.672611	0.200937
1944	0.0837476	0.142502	-0.191405	0.170189		0.188088	0.393094	-0.668966	0.202028
1945	0.0868429	0.14244	-0.185102	0.167914		0.19173	0.393323	-0.665179	0.203133
1946	0.0901208	0.142399	-0.178662	0.165612		0.195529	0.393571	-0.661255	0.204251
1947	0.093579	0.14238	-0.17209	0.163285		0.199483	0.393837	-0.657197	0.205382
1948	0.0972148	0.142384	-0.16539	0.160935		0.203589	0.394121	-0.653008	0.206525
1949	0.101025	0.142414	-0.158565	0.158562		0.207844	0.394424	-0.648692	0.207679
1950	0.105007	0.14247	-0.151619	0.156168		0.212247	0.394744	-0.644253	0.208843
1951	0.109158	0.142554	-0.144558	0.153756		0.216793	0.395082	-0.639696	0.210016
1952	0.113472	0.142668	-0.137385	0.151326		0.221479	0.395438	-0.635025	0.211196
1953	0.117947	0.142813	-0.130106	0.14888		0.226302	0.395811	-0.630245	0.212384
1954	0.122578	0.14299	-0.122727	0.146419		0.231258	0.3962	-0.62536	0.213577
1955	0.12736	0.143199	-0.115251	0.143947		0.236343	0.396606	-0.620376	0.214773
1956	0.132288	0.143442	-0.107685	0.141463		0.241552	0.397028	-0.615299	0.215973
1957	0.137358	0.14372	-0.100034	0.138971		0.246881	0.397465	-0.610133	0.217173
1958	0.142564	0.144033	-0.0923043	0.136472		0.252325	0.397916	-0.604885	0.218373
1959	0.1479	0.144382	-0.0845019	0.133968		0.257879	0.398382	-0.599559	0.219571
1960	0.15336	0.144768	-0.076633	0.13146		0.263537	0.398861	-0.594162	0.220765
1961	0.158939	0.145189	-0.0687038	0.128952		0.269295	0.399352	-0.588701	0.221954
1962	0.164629	0.145647	-0.060721	0.126444		0.275146	0.399856	-0.583181	0.223136
1963	0.170426	0.146142	-0.0526911	0.123939		0.281085	0.40037	-0.577608	0.224308
1964	0.176321	0.146673	-0.044621	0.121439		0.287105	0.400894	-0.571989	0.22547
1965	0.182308	0.14724	-0.0365174	0.118946		0.293201	0.401427	-0.56633	0.22662
1966	0.188381	0.147843	-0.0283873	0.116463		0.299366	0.401968	-0.560639	0.227755
1967	0.194531	0.148481	-0.0202377	0.113991		0.305594	0.402515	-0.554921	0.228874
1968	0.200753	0.149153	-0.0120757	0.111532		0.311877	0.403069	-0.549183	0.229975
1969	0.207037	0.149858	-0.00390853	0.10909		0.31821	0.403627	-0.543431	0.231056
1970	0.213377	0.150597	0.00425672	0.106666		0.324585	0.404189	-0.537674	0.232116
1971	0.219766	0.151367	0.0124128	0.104261		0.330994	0.404753	-0.531916	0.233153
1972	0.226195	0.152167	0.0205524	0.10188		0.337432	0.405318	-0.526165	0.234165
1973	0.232656	0.152997	0.0286684	0.0995233		0.34389	0.405883	-0.520428	0.23515
1974	0.239143	0.153855	0.0367533	0.0971936		0.350361	0.406447	-0.514711	0.236107
1975	0.245647	0.15474	0.0447999	0.0948933		0.356837	0.407007	-0.509021	0.237035
1976	0.252159	0.155651	0.0528009	0.0926245		0.363312	0.407564	-0.503364	0.23793
1977	0.258674	0.156586	0.0607491	0.0903894		0.369777	0.408115	-0.497748	0.238793
1978	0.265181	0.157543	0.0686371	0.0881903		0.376225	0.408659	-0.492178	0.239621
1979	0.271674	0.158521	0.0764578	0.0860292		0.382648	0.409196	-0.486661	0.240413
1980	0.278144	0.159519	0.084204	0.0839083		0.389038	0.409722	-0.481203	0.241168
1981	0.284584	0.160535	0.0918684	0.0818296		0.395389	0.410238	-0.475811	0.241885
1982	0.290985	0.161568	0.0994439	0.0797953		0.401691	0.410741	-0.470491	0.242562
1983	0.29734	0.162616	0.106924	0.0778073		0.407937	0.41123	-0.46525	0.243197
1984	0.303642	0.163678	0.1143	0.0758677		0.414119	0.411705	-0.460092	0.243791
1985	0.309882	0.164752	0.121567	0.0739783		0.420231	0.412163	-0.455024	0.244342
1986	0.316053	0.165837	0.128718	0.072141		0.426264	0.412603	-0.450053	0.244848
1987	0.322147	0.166931	0.135745	0.0703576		0.43221	0.413023	-0.445183	0.24531
1988	0.328157	0.168034	0.142642	0.0686299		0.438062	0.413424	-0.44042	0.245726
1989	0.334075	0.169143	0.149403	0.0669595		0.443814	0.413802	-0.43577	0.246096
1990	0.339896	0.170258	0.156021	0.065348		0.449456	0.414157	-0.431238	0.246418
1991	0.34561	0.171377	0.16249	0.0637969		0.454983	0.414488	-0.426829	0.246693
1992	0.351213	0.172499	0.168805	0.0623076		0.460388	0.414794	-0.422548	0.24692
1993	0.356696	0.173624	0.174958	0.0608813		0.465663	0.415072	-0.4184	0.247098
1994	0.362054	0.17475	0.180945	0.0595194		0.470802	0.415322	-0.41439	0.247227
1995	0.36728	0.175876	0.186759	0.058223		0.475798	0.415544	-0.410523	0.247306
1996	0.372367	0.177001	0.192396	0.056993		0.480646	0.415734	-0.406802	0.247336
1997	0.377311	0.178124	0.19785	0.0558305		0.485339	0.415894	-0.403232	0.247316
1998	0.382105	0.179246	0.203116	0.0547363		0.489871	0.416021	-0.399817	0.247247
[truncated: 24,503 more rows]
