# Supplementary material for: Neural circuit mechanisms for transforming learned olfactory valences into wind-oriented movement
Source: eLife. 2023 Sep 18;12:e85756. doi: 10.7554/eLife.85756 (PMC10588983; doi:10.7554/eLife.85756)
Supplement: Figure 5—source data 3. [file elife-85756-fig5-data3.xlsx]

## Sheet: Sheet1
	OCT			MCH
	Pre	Post		Pre	Post
mean	0.657067	3.74457		1.72929	1.82273
SEM	0.151491	0.78114		0.706306	0.572579
Fly1	0.955875	7.20384		0.727484	3.13079
Fly2	0.700728	3.11057		1.69807	2.1582
Fly3	0.36169	1.40043		4.67734	2.84114
Fly4	0.702246	4.06621		-0.171148	-0.807609
Fly5	1.1128	3.43319		2.63269	1.64036
Fly6	0.10906	3.25317		0.811302	1.97351
