# Supplementary material for: Neural circuit mechanisms for transforming learned olfactory valences into wind-oriented movement
Source: eLife. 2023 Sep 18;12:e85756. doi: 10.7554/eLife.85756 (PMC10588983; doi:10.7554/eLife.85756)
Supplement: Figure 6—figure supplement 1—source data 1. [file elife-85756-fig6-figsupp1-data1.xlsx]

## Sheet: Sheet1
genotype	w;w,20xUAS-CsChrimson-mVenus;+/MB011C												w;w,20xUAS-CsChrimson-mVenus;+/Empty-split												w;w,20xUAS-CsChrimson-mVenus;+/SS49899												w;w,20xUAS-CsChrimson-mVenus;+/SS67221												w;w,20xUAS-CsChrimson-mVenus;+/SS45234
Initial orientation	downwind						upwind						downwind						upwind						downwind						upwind						downwind						upwind						downwind
	Forward walking speed (mm/s)		Angular speed (degree/second)		cos(upwind)		Forward walking speed (mm/s)		Angular speed (degree/second)		cos(upwind)		Forward walking speed (mm/s)		Angular speed (degree/second)		cos(upwind)		Forward walking speed (mm/s)		Angular speed (degree/second)		cos(upwind)		Forward walking speed (mm/s)		Angular speed (degree/second)		cos(upwind)		Forward walking speed (mm/s)		Angular speed (degree/second)		cos(upwind)		Forward walking speed (mm/s)		Angular speed (degree/second)		cos(upwind)		Forward walking speed (mm/s)		Angular speed (degree/second)		cos(upwind)		Forward walking speed (mm/s)
Time	mean	confidence interval	mean	confidence interval	mean	confidence interval	mean	confidence interval	mean	confidence interval	mean	confidence interval	mean	confidence interval	mean	confidence interval	mean	confidence interval	mean	confidence interval	mean	confidence interval	mean	confidence interval	mean	confidence interval	mean	confidence interval	mean	confidence interval	mean	confidence interval	mean	confidence interval	mean	confidence interval	mean	confidence interval	mean	confidence interval	mean	confidence interval	mean	confidence interval	mean	confidence interval	mean	confidence interval	mean
0.03333	0.5474	0.1353	48.1819	8.4117	-0.8407	0.0149	0.9736	0.2255	61.1013	14.5288	0.8012	0.0221	0.7938	0.1309	94.7732	15.1789	-0.8577	0.0114	1.6244	0.2667	110.809	18.2854	0.8258	0.0161	0.5637	0.155	51.5771	11.7953	-0.8686	0.0172	2.0452	0.4417	130.237	35.8271	0.8402	0.0289	0.6187	0.1778	52.7046	13.3053	-0.8264	0.0228	1.794	0.4194	133.278	37.4581	0.8078	0.0324	0.7783
0.06667	0.5216	0.1336	57.0518	13.3947	-0.8342	0.0158	0.9534	0.2272	57.3731	13.5964	0.7947	0.0235	0.8481	0.1686	101.19	16.1547	-0.8394	0.0139	1.6495	0.2836	127.36	24.0608	0.8152	0.0206	0.526	0.1584	67.5664	13.5775	-0.8607	0.0192	2.1623	0.5455	140.619	41.2173	0.8234	0.0346	0.6407	0.1803	65.0233	14.7879	-0.816	0.0249	1.7701	0.4583	92.3556	24.6761	0.8116	0.0343	0.742
0.1	0.4343	0.1918	113.853	19.5497	-0.8198	0.0185	0.9838	0.3292	110.911	26.3589	0.7773	0.0282	0.8728	0.1294	163.647	18.1513	-0.8085	0.0171	1.6522	0.2648	169.955	23.2751	0.8068	0.0239	0.5023	0.1857	146.982	28.1742	-0.8329	0.0254	2.1521	0.4897	209.691	52.3552	0.7979	0.0499	0.6567	0.2023	141.393	29.3725	-0.781	0.0328	2.0718	0.4983	139.101	32.4431	0.8095	0.0381	0.8127
0.13333	0.4973	0.1426	180.872	25.9021	-0.7849	0.0236	0.8346	0.2466	144.22	29.3953	0.7574	0.0355	0.9929	0.1343	221.427	21.2106	-0.7508	0.0225	1.627	0.2634	204.233	26.0232	0.782	0.0283	0.3872	0.175	207.663	33.4563	-0.7829	0.036	1.9056	0.4625	256.071	61.1595	0.7683	0.0643	0.7847	0.2206	170.634	33.5757	-0.7241	0.0451	2.2621	0.5172	132.216	33.3766	0.8021	0.0429	0.685
0.16667	0.6061	0.1394	193.48	24.3889	-0.7384	0.0305	0.8789	0.2377	156.285	30.985	0.7278	0.0445	1.1572	0.1375	208.075	18.4233	-0.6851	0.0287	1.5779	0.241	180.739	22.67	0.7529	0.0333	0.4256	0.1523	233.665	35.5695	-0.7118	0.0481	1.6921	0.3964	250.23	59.4521	0.7124	0.0731	0.8086	0.1867	158.457	31.5841	-0.6672	0.0566	2.1826	0.4735	163.683	39.2603	0.7804	0.0515	0.6497
0.2	0.713	0.1431	178.192	21.2658	-0.6879	0.0374	1.0105	0.2565	145.449	28.4	0.6996	0.051	1.2623	0.1325	173.354	16.4617	-0.6304	0.0328	1.5544	0.2209	158.729	20.0563	0.7278	0.0372	0.5665	0.1482	256.407	37.3399	-0.622	0.0595	1.7558	0.3836	231.378	51.7899	0.6472	0.0803	0.8229	0.1865	132.213	25.7555	-0.6227	0.0634	2.0712	0.4268	129.757	34.5356	0.7611	0.0531	0.6419
0.23333	0.8575	0.1522	157.877	20.7461	-0.6385	0.043	1.0918	0.2545	126.394	25.088	0.6751	0.0557	1.2695	0.1269	141.709	14.4718	-0.5827	0.0363	1.5869	0.2103	155.664	24.7729	0.7021	0.0408	0.7038	0.1548	279.223	39.3297	-0.5174	0.0692	1.7141	0.3882	238.398	57.9304	0.5782	0.0895	0.8086	0.1838	136.449	27.5625	-0.5749	0.0678	2.1684	0.4683	116.278	41.0965	0.7624	0.0538	0.6428
0.26667	0.9478	0.155	135.603	16.7359	-0.5992	0.0473	1.0931	0.2464	107.454	20.4123	0.6565	0.0594	1.258	0.1254	127.763	13.8225	-0.5456	0.0389	1.5505	0.2052	127.204	18.6686	0.6825	0.0437	0.8171	0.1596	263.261	37.6917	-0.4153	0.078	1.7741	0.4532	245.034	57.8657	0.5196	0.0984	0.8866	0.1859	136.243	26.0333	-0.5249	0.0728	2.13	0.5049	101.609	29.426	0.7541	0.0584	0.5915
0.3	0.9899	0.1566	125.095	17.0053	-0.5651	0.0505	1.1012	0.2568	118.067	23.6363	0.6419	0.0626	1.2506	0.1305	111.344	11.6633	-0.5134	0.0409	1.5168	0.2204	149.813	25.5503	0.668	0.0451	0.8899	0.1635	227.944	33.2439	-0.3353	0.0847	1.6191	0.3946	234.458	54.8587	0.461	0.1074	0.983	0.1862	130.589	24.0018	-0.478	0.0781	2.0887	0.4762	126.719	38.6374	0.7426	0.0635	0.575
0.33333	1.0101	0.1554	111.84	14.8071	-0.5372	0.0532	1.1101	0.2381	118.177	29.2893	0.6366	0.0648	1.2468	0.132	109.564	11.863	-0.487	0.0427	1.4245	0.2038	146.033	22.6907	0.6496	0.0465	0.8555	0.1548	193.984	30.2203	-0.2809	0.0889	1.5691	0.3797	209.57	47.2103	0.4166	0.1154	1.0949	0.2022	128.621	24.5883	-0.4308	0.0826	2.1354	0.4446	124.331	38.69	0.7459	0.0653	0.5877
0.36667	1.013	0.1551	107.706	13.9247	-0.5141	0.0551	1.0409	0.2291	114.684	25.4768	0.6284	0.0665	1.3861	0.1757	123.525	17.5008	-0.4594	0.044	1.4792	0.235	154.459	25.5093	0.6292	0.0485	0.8811	0.1581	170.203	27.0332	-0.2464	0.0912	1.5876	0.3706	178.355	41.31	0.3931	0.1207	1.2059	0.225	121.285	22.3482	-0.3906	0.0863	1.9646	0.5366	118.924	26.265	0.7422	0.0657	0.6204
0.4	1.0449	0.1605	123.412	16.105	-0.4926	0.0569	0.92	0.2166	104.541	19.7395	0.6172	0.0678	1.3938	0.1767	136.525	16.2823	-0.436	0.0451	1.4725	0.2384	160.705	23.2868	0.6073	0.0506	0.8829	0.156	167.498	25.6386	-0.2215	0.0919	1.6042	0.3885	190.958	51.7112	0.3931	0.1232	1.2258	0.2452	139.349	25.6252	-0.3488	0.0905	2.1504	0.4857	134.417	28.4179	0.736	0.0674	0.7802
0.43333	0.9646	0.1697	164.339	21.1079	-0.4676	0.0583	0.9233	0.2331	160.382	31.9087	0.5977	0.0695	1.4456	0.1861	180.186	19.8025	-0.4082	0.0457	1.5933	0.2408	213.535	30.7369	0.5884	0.0528	0.7966	0.1734	213.297	26.5276	-0.1909	0.0918	1.5408	0.4061	246.385	55.7288	0.3936	0.1281	1.2483	0.2243	180.937	30.4292	-0.292	0.0931	2.2339	0.492	198.003	54.4699	0.7176	0.0796	0.8746
0.46667	0.9103	0.1659	203.954	22.2515	-0.4365	0.0591	0.9158	0.2159	209.094	32.3518	0.58	0.0703	1.5879	0.163	215.055	18.0161	-0.371	0.0465	1.6907	0.2484	227.264	29.7958	0.5698	0.0564	0.7285	0.1849	304.484	32.138	-0.1339	0.0907	1.4414	0.3706	283.037	51.3452	0.3762	0.1316	1.3023	0.2403	240.147	41.1361	-0.2292	0.0958	2.1176	0.4304	179.758	43.7822	0.7217	0.0818	0.7083
0.5	1.0497	0.1652	215.61	23.9662	-0.3922	0.0599	1.0584	0.2327	238.766	35.0701	0.553	0.0713	1.7241	0.1643	227.941	17.5452	-0.3293	0.0469	1.6508	0.2311	216.415	25.1418	0.5481	0.0588	0.8084	0.1763	352.247	36.3981	-0.0533	0.0886	1.1959	0.2718	268.247	52.0304	0.3488	0.1324	1.434	0.2374	227.824	36.9929	-0.1618	0.0976	2.0148	0.4116	203.502	42.4133	0.7297	0.0788	0.6925
0.53333	1.1537	0.1666	204.314	21.0168	-0.3437	0.0612	1.1556	0.2354	230.845	32.6506	0.5184	0.0729	1.8167	0.1598	197.19	15.7004	-0.2881	0.0474	1.768	0.2438	193.363	24.028	0.5224	0.061	0.9743	0.1636	368.219	38.2279	0.0407	0.0856	1.0422	0.2618	263.202	51.0815	0.3136	0.13	1.4506	0.2285	203.827	30.3119	-0.1008	0.0986	1.9144	0.3769	179.957	41.5818	0.7122	0.0804	0.6937
0.56667	1.2519	0.1703	192.482	19.6745	-0.2943	0.0629	1.2992	0.2375	200.654	30.1406	0.4871	0.0752	1.8493	0.158	177.267	15.446	-0.2482	0.048	1.7573	0.2219	166.826	21.8972	0.5008	0.0629	1.1518	0.1788	376.429	36.6527	0.1346	0.0823	0.8604	0.2631	259.268	51.5114	0.2839	0.1271	1.4774	0.2248	193.584	31.1357	-0.0507	0.0997	1.8203	0.3854	148.407	33.6577	0.6942	0.0844	0.6917
0.6	1.2546	0.167	180.228	18.5831	-0.2499	0.0646	1.3576	0.2402	183.179	27.6308	0.455	0.0786	1.8399	0.1583	155.695	13.3038	-0.2154	0.0486	1.7786	0.2236	170.754	21.8481	0.4814	0.0623	1.2186	0.1711	379.881	37.2266	0.2217	0.0801	0.7514	0.2387	263.155	52.44	0.2434	0.1281	1.5762	0.2342	172.716	27.737	-0.0022	0.1	1.6971	0.4087	132.177	35.829	0.6802	0.0881	0.6662
0.63333	1.297	0.1647	173.795	17.5668	-0.2138	0.066	1.387	0.2435	157.333	22.5159	0.4333	0.0808	1.857	0.1582	154.832	14.0109	-0.1862	0.0493	1.7709	0.2226	160.12	21.6752	0.4585	0.0629	1.2594	0.1695	359.038	35.4002	0.2909	0.0792	0.75	0.2217	291.329	50.8721	0.199	0.132	1.6306	0.2506	158.687	28.2275	0.0416	0.0998	1.6239	0.4606	125.077	31.5908	0.6665	0.0921	0.6891
0.66667	1.2986	0.1601	169.603	18.2831	-0.1817	0.0673	1.3521	0.2469	155.955	21.272	0.4165	0.0823	1.8449	0.1585	142.208	12.7755	-0.1559	0.0498	1.8167	0.2299	145.279	20.6339	0.4491	0.063	1.3156	0.1635	325.422	32.5547	0.3323	0.0787	0.9386	0.2361	302.569	52.8738	0.1609	0.133	1.6362	0.2326	162.424	28.9014	0.0859	0.0992	1.6763	0.4397	142.653	37.6008	0.6628	0.0953	0.7368
0.7	1.2809	0.1637	166.981	17.641	-0.1544	0.0683	1.3665	0.2572	177.36	25.4938	0.405	0.0829	1.8648	0.159	142.527	13.0516	-0.1295	0.0499	1.8428	0.2321	144.887	20.9315	0.4406	0.0626	1.3377	0.1594	301.234	31.325	0.3541	0.0778	1.048	0.2261	325.916	54.2547	0.1347	0.1326	1.6174	0.2619	161.64	33.2131	0.1294	0.0978	1.6329	0.4377	156.196	39.5951	0.6646	0.099	0.748
0.73333	1.3194	0.178	157.17	15.8932	-0.1313	0.0686	1.3841	0.2654	177.123	26.5646	0.3919	0.0828	1.9223	0.1631	147.463	13.4571	-0.1041	0.0503	1.8585	0.2398	151.095	21.7153	0.4288	0.0632	1.4856	0.1715	271.371	28.3143	0.3585	0.0776	1.0639	0.205	272.966	49.828	0.1215	0.131	1.6705	0.2427	167.062	30.8265	0.173	0.0959	1.6221	0.4554	188.427	59.7362	0.6876	0.0887	0.7928
0.76667	1.3586	0.1791	150.556	15.0411	-0.1082	0.0687	1.4105	0.2651	171.64	26.2447	0.3692	0.0841	1.9506	0.1632	143.632	13.7446	-0.0842	0.0506	1.8872	0.2471	143.683	19.4034	0.4194	0.0637	1.4859	0.1681	247.933	27.2347	0.3593	0.0779	1.1178	0.2191	260.902	48.6994	0.1231	0.1314	1.7534	0.2538	178.874	32.0946	0.2137	0.0936	1.599	0.3915	156.95	37.779	0.6845	0.0886	0.835
0.8	1.3601	0.1823	159.296	15.6326	-0.0863	0.0685	1.4205	0.2514	149.287	20.781	0.3504	0.0846	1.972	0.1625	123.341	11.2387	-0.0648	0.0508	1.9647	0.2544	139.214	18.5694	0.4048	0.0648	1.4424	0.1729	234.394	27.9434	0.3628	0.0775	1.1224	0.2331	258.861	49.5243	0.1395	0.1335	1.8183	0.2663	159.03	26.2961	0.2463	0.0919	1.657	0.4103	156.877	57.9385	0.6959	0.0847	0.9138
0.83333	1.3492	0.181	155.451	16.7889	-0.0593	0.0686	1.4383	0.26	145.658	21.8145	0.3319	0.0852	1.9867	0.1593	128.344	12.325	-0.0441	0.0509	1.9871	0.2466	134.641	17.8219	0.3952	0.0653	1.4009	0.1767	241.761	30.693	0.3672	0.0765	1.1091	0.1963	243.456	50.7457	0.1657	0.1342	1.8144	0.273	152.978	31.2329	0.2718	0.0921	1.6518	0.3934	131.02	32.8737	0.6873	0.0846	0.9753
0.86667	1.3634	0.1854	156.411	16.3262	-0.0353	0.0689	1.4721	0.2622	150.018	22.1577	0.3145	0.0862	2.0574	0.1673	131.184	12.0849	-0.0233	0.0511	1.967	0.2494	129.713	21.2388	0.3881	0.0654	1.3706	0.1776	238.646	28.6885	0.3721	0.076	1.2001	0.2269	268.645	47.6297	0.2037	0.1325	1.8893	0.2664	159.157	27.6797	0.3075	0.0907	1.7793	0.4651	129.2	31.9176	0.677	0.0867	1.0297
0.9	1.3756	0.1796	157.195	16.869	-0.0173	0.0691	1.5119	0.2667	155.94	22.9493	0.2937	0.0872	2.036	0.1664	125.148	11.822	-0.0075	0.0513	1.9244	0.2404	141.069	19.0286	0.3771	0.0661	1.3953	0.1696	245.964	26.9762	0.3692	0.0768	1.1223	0.2116	292.332	55.5576	0.2434	0.1304	1.9508	0.2624	145.881	25.5872	0.3297	0.0897	1.7902	0.4542	115.318	28.2967	0.6635	0.0907	1.0602
0.93333	1.4093	0.1764	144.923	16.0123	-0.0046	0.0688	1.5177	0.2603	163.435	27.0191	0.2701	0.088	2.0664	0.1759	123.032	11.9433	0.0079	0.0513	1.9985	0.2501	157.371	22.1712	0.3715	0.0653	1.4736	0.1808	255.166	28.4922	0.3593	0.0779	1.2575	0.2334	285.647	51.617	0.2773	0.1277	1.989	0.2638	143.117	22.0857	0.3476	0.0888	1.6134	0.3649	133.926	37.5749	0.656	0.0958	1.1253
0.96667	1.4068	0.1737	127.217	13.8711	0.0055	0.0682	1.4838	0.2493	143.032	22.8686	0.251	0.0883	2.0574	0.1716	125.901	12.1741	0.0207	0.0512	2.0094	0.257	128.704	19.4137	0.362	0.0655	1.5337	0.1848	247.503	27.9083	0.3512	0.0793	1.2712	0.2735	307.384	65.3818	0.2959	0.1263	1.9315	0.265	135.164	21.4316	0.3628	0.0885	1.6007	0.4052	126.63	31.2023	0.6435	0.101	1.1932
1	1.3727	0.1748	131.28	13.6087	0.0158	0.068	1.4653	0.2412	137.27	22.3534	0.2329	0.0882	2.0868	0.181	116.642	10.922	0.0341	0.0513	2.0117	0.2582	136.521	22.3806	0.3476	0.066	1.5952	0.1798	234.57	27.4038	0.341	0.0804	1.1762	0.2525	248.11	49.9106	0.3118	0.1265	2.0436	0.2968	162.552	34.0871	0.3746	0.0878	1.5755	0.4175	138.758	37.0735	0.6357	0.1041	1.2441
1.03333	1.4084	0.1939	136.273	14.782	0.025	0.068	1.4584	0.2365	149.203	24.7275	0.2101	0.089	2.017	0.1706	122.399	12.8585	0.0434	0.0512	2.0232	0.254	130.867	16.6021	0.3429	0.0667	1.65	0.1834	220.253	27.1671	0.3319	0.0808	1.1832	0.2708	218.785	43.3799	0.3253	0.126	1.8666	0.2746	143.632	26.9749	0.3898	0.087	1.6098	0.4004	142.114	36.9858	0.6214	0.108	1.272
1.06667	1.4048	0.1895	135.349	15.3916	0.0337	0.0679	1.3989	0.2338	133.382	22.1908	0.1942	0.0897	2.0556	0.1826	122.475	12.593	0.0547	0.0511	1.9996	0.2641	126.528	18.2112	0.3361	0.0671	1.6795	0.1934	203.719	24.4696	0.3302	0.0809	1.2726	0.2737	212.778	44.2043	0.3378	0.1273	1.9163	0.2751	153.809	27.5728	0.3998	0.086	1.6311	0.4216	148.397	35.6271	0.6085	0.1108	1.25
1.1	1.4234	0.1857	137.797	15.4591	0.0436	0.0679	1.3906	0.2332	151.545	24.8331	0.1744	0.0896	1.9926	0.1697	126.573	13.2371	0.0662	0.051	2.0225	0.2732	138.741	22.3763	0.3285	0.0677	1.646	0.1903	215.367	25.6982	0.3298	0.0808	1.3983	0.2993	243.442	51.249	0.3548	0.1252	1.9272	0.2822	154.929	25.4306	0.4093	0.0841	1.5381	0.4129	155.252	36.8125	0.6029	0.1104	1.2705
1.13333	1.4518	0.1867	135.954	14.1698	0.0555	0.0677	1.4208	0.2423	146.405	24.9141	0.1553	0.0899	2.0149	0.1747	131.517	13.6269	0.0787	0.051	1.9005	0.255	142.938	18.6056	0.3243	0.0673	1.6143	0.1884	208.287	24.5567	0.3365	0.0806	1.3365	0.2676	252.966	43.7859	0.3564	0.123	1.9802	0.2658	162.925	24.2862	0.4251	0.0819	1.6501	0.4273	175.434	44.3354	0.6142	0.1059	1.2805
1.16667	1.4421	0.18	129.826	14.1769	0.0639	0.0677	1.5053	0.2771	144.851	27.2897	0.1435	0.0905	1.9794	0.1715	119.196	11.8277	0.0852	0.051	1.9009	0.2428	150.436	23.6223	0.3253	0.0665	1.6588	0.1925	208.018	25.1727	0.3466	0.0796	1.4266	0.2557	209.3	39.1039	0.353	0.1232	1.9844	0.2599	139.423	23.1348	0.4429	0.0795	1.4251	0.3713	170.642	47.3295	0.6284	0.1005	1.3001
1.2	1.4789	0.1842	128.038	15.9488	0.0717	0.0681	1.4795	0.2754	135.204	21.3495	0.1368	0.0913	1.9561	0.1683	115.906	11.1357	0.0902	0.051	1.9119	0.2361	146.499	21.8332	0.3166	0.067	1.6872	0.188	208.132	25.3409	0.3553	0.078	1.4328	0.2632	189.183	36.4544	0.3469	0.1244	1.9558	0.2609	134.766	23.6752	0.46	0.0771	1.4149	0.3865	181.632	48.3572	0.6409	0.0971	1.3135
1.23333	1.4433	0.1767	118.109	13.2486	0.0779	0.0684	1.5177	0.2715	121.258	18.9181	0.1304	0.0915	1.9517	0.1663	111.109	10.9676	0.0936	0.051	1.8839	0.226	127.041	17.0057	0.3162	0.0669	1.7607	0.2085	194.395	24.9767	0.3624	0.0764	1.4543	0.2848	197.615	42.6112	0.3344	0.124	2.0071	0.2754	146.481	22.3165	0.4764	0.0753	1.5303	0.3824	175.793	46.8584	0.6489	0.0945	1.325
1.26667	1.4772	0.1959	121.026	14.7583	0.084	0.0686	1.5259	0.2693	119.942	19.7134	0.1211	0.0918	1.9832	0.1672	112.636	10.7662	0.1047	0.0508	1.8553	0.2307	127.094	18.3458	0.3144	0.0665	1.8309	0.1958	196.04	23.0769	0.3719	0.0748	1.385	0.2841	206.852	42.138	0.3297	0.1236	2.106	0.2798	134.956	20.2206	0.4885	0.0741	1.6344	0.3939	159.984	39.7849	0.6523	0.0907	1.3148
1.3	1.4465	0.1826	121.353	14.0046	0.0905	0.0686	1.546	0.28	118.584	19.3757	0.1133	0.092	2.0084	0.1675	118.242	11.1015	0.1111	0.0508	1.8648	0.2393	128.186	19.0118	0.3128	0.0669	1.7933	0.1796	191.952	24.2047	0.3849	0.0732	1.481	0.313	203.674	40.2546	0.3354	0.1235	2.059	0.276	133.421	20.228	0.5051	0.073	1.6188	0.3879	156.507	46.4774	0.6528	0.089	1.2736
1.33333	1.3851	0.1799	120.153	15.2519	0.0986	0.0685	1.5703	0.2857	120.989	20.8635	0.1126	0.0922	1.9687	0.1633	118.005	11.4411	0.1187	0.0508	1.7724	0.2401	139.947	21.3699	0.3148	0.067	1.7748	0.1706	186.627	22.875	0.3993	0.0729	1.434	0.3099	175.441	33.042	0.3461	0.124	2.0391	0.2954	132.432	21.2595	0.5119	0.073	1.6159	0.3898	134.35	29.8793	0.6481	0.089	1.2458
1.36667	1.3218	0.1832	125.201	16.5387	0.0999	0.0683	1.5731	0.284	122.427	19.7031	0.111	0.0923	1.9604	0.1646	112.404	10.5929	0.1248	0.051	1.6782	0.2328	124.263	17.2708	0.3193	0.0669	1.8845	0.1751	192.434	23.5361	0.4122	0.0729	1.3867	0.2867	170.392	31.7696	0.3551	0.1239	2.0239	0.2695	135.88	21.62	0.5186	0.072	1.6621	0.3797	121.656	31.4595	0.6466	0.0856	1.2555
1.4	1.3061	0.1788	118.018	13.4399	0.1035	0.0681	1.531	0.2755	107.85	18.8319	0.1065	0.093	1.9619	0.1688	118.337	12.0007	0.1284	0.0511	1.6939	0.2294	124.61	20.9798	0.3196	0.067	1.8285	0.1738	187.863	22.8509	0.4216	0.0723	1.3206	0.294	187.322	38.73	0.3487	0.1255	1.844	0.2788	146.798	32.2086	0.5175	0.0703	1.6572	0.3777	155.358	31.4371	0.6483	0.0851	1.253
1.43333	1.2522	0.1694	124.426	14.8334	0.1057	0.0675	1.5027	0.2754	106.437	16.9366	0.0974	0.0931	1.9718	0.1622	113.702	10.9096	0.1277	0.051	1.5963	0.2249	116.718	16.9963	0.3187	0.0673	1.8311	0.1892	178.634	22.7317	0.4254	0.0723	1.2616	0.273	164.826	35.6674	0.3429	0.1264	1.7956	0.3343	163.899	25.1862	0.5204	0.0692	1.6027	0.3941	151.125	37.6557	0.6409	0.0861	1.2468
1.46667	1.2582	0.1716	119.028	14.0124	0.1077	0.0672	1.4894	0.2744	103.984	17.8667	0.0879	0.0933	1.9493	0.1607	113.078	11.2019	0.1292	0.0508	1.6529	0.2247	131.467	22.3222	0.3203	0.0674	1.8637	0.1861	175.904	21.862	0.4309	0.0724	1.2645	0.2617	182.993	31.4562	0.3394	0.127	1.8356	0.2759	156.911	25.7332	0.5195	0.0681	1.4967	0.3584	128.426	30.9118	0.644	0.0858	1.2243
[truncated: 71 more columns]
