# Supplementary material for: Neural circuit mechanisms for transforming learned olfactory valences into wind-oriented movement
Source: eLife. 2023 Sep 18;12:e85756. doi: 10.7554/eLife.85756 (PMC10588983; doi:10.7554/eLife.85756)
Supplement: Figure 6—source data 1. [file elife-85756-fig6-data1.xlsx]

## Sheet: Sheet1
genotype	w;w,20xUAS-CsChrimson-mVenus; +/SS33917
Starvation	fed	starved
#01	0.05221	0.10205
#02	0.11013	0.16925
#03	-0.00095	0.11192
#04	0.06556	0.27907
#05	-0.07508	0.23529
#06	0.08777	-0.01464
#07	-0.01564	0.05253
#08	-0.02658	0.13336
#09	0.05618	0.20509
#10	-0.04541	0.16961
#11	0.06849	0.10421
#12	0.10519	0.09204
#13	0.07493	0.0918
#14	0.03333	0.07795
#15		0.0718
#16		0.07995
