# Supplementary material for: Neural circuit mechanisms for transforming learned olfactory valences into wind-oriented movement
Source: eLife. 2023 Sep 18;12:e85756. doi: 10.7554/eLife.85756 (PMC10588983; doi:10.7554/eLife.85756)
Supplement: Figure 6—source data 2. [file elife-85756-fig6-data2.xlsx]

## Sheet: Sheet1
genotype	w;w,20xUAS-CsChrimson-mVenus; +/SS33917
Flow Rate (mL/min)	0	25	50	100	200	-200
#01	0.0067	0.0312	0.0544	0.0978	0.1364	-0.1683
#02	0.0433	0.0844	-0.0102	0.0661	0.0672	-0.097
#03	-0.0387	-0.0625	0.0588	0.0185	0.1135	-0.0411
#04	-0.0338	0.0194	0.1019	0.0693	0.3518	0.0526
#05	-0.0137	-0.0047	0.0165	0.0595	0.0493	0.112
#06	0.0751	-0.0176	0.2186	0.1241	0.1366	-0.0535
#07	0.1225	0.0698	0.0369	0.0235	0.2515	-0.2276
#08	0.0133	0.0874	0.0627	0.0659	0.1418	-0.0278
#09	0.0709	-0.014	0.1768	0.0635	0.0772	-0.1275
#10	0.0529	-0.0518	0.1474	0.0503		-0.0574
#11	-0.0688	0.024	0.0364	0.0922		-0.0687
#12	-0.0063					-0.3019
#13	-0.0974					-0.0775
#14						-0.0663
#15						0.0174
#16						-0.2442
