# Supplementary material for: Neural circuit mechanisms for transforming learned olfactory valences into wind-oriented movement
Source: eLife. 2023 Sep 18;12:e85756. doi: 10.7554/eLife.85756 (PMC10588983; doi:10.7554/eLife.85756)
Supplement: Figure 6—source data 3. [file elife-85756-fig6-data3.xlsx]

## Sheet: Sheet1
genotype	w;w,20xUAS-CsChrimson-mVenus; +/SS33917
Ablation	Intact	Unilateral	Bilateral
#01	0.0167	0.0621	0.019
#02	0.082	0.0183	0.0491
#03	0.0371	0.0275	0.0583
#04	0.0716	-0.0049	0.0259
#05	0.0977	0.0298	0.1516
#06	0.0235	0.081	0.0249
#07	0.0549	0.0839	0.0202
#08	0.1364	0.0312	0.0971
#09	0.0662	0.1745	0.016
#10	0.0368	-0.0087	0.0339
#11	0.0198	0.0201	0.0259
#12	0.1364	0.0141	0.0209
#13	0.0672	0.0675	-0.0387
#14	0.1135	-0.0318	-0.0221
#15	0.3518	0.0725	0.1212
#16	0.0493	-0.0138	-0.0077
#17	0.1366	0.1072	0.0619
#18	0.2515	0.0546	0.0808
#19	0.1418	-0.0235	0.0188
#20	0.0772	0.0218	0.0152
#21		0.0532	0.0136
#22		0.0686	0.1235
#23		0.0176	-0.0311
#24		0.0205	0.1154
#25		0.0605	0.053
#26		0.0029	0.0293
#27		0.0378	0.002
#28		-0.0047	-0.0662
#29		0.0277	0.0485
#30		-0.0249	0.0503
#31		0.0291	0.0579
#32		0.0176	-0.0123
#33		0.0418	0.0896
#34		0.0235	-0.0168
#35		-0.0986	0.0461
#36		-0.0137	0.0467
#37		0.1014	-0.0301
#38		0.0461	0.0102
#39		0.0439	0.0164
#40		0.0181	0.0363
