# Supplementary material for: Neural circuit mechanisms for transforming learned olfactory valences into wind-oriented movement
Source: eLife. 2023 Sep 18;12:e85756. doi: 10.7554/eLife.85756 (PMC10588983; doi:10.7554/eLife.85756)
Supplement: Figure 6—source data 4. [file elife-85756-fig6-data4.xlsx]

## Sheet: Sheet1
initial orientation	upwind																		downwiind
genotype	w;w,20xUAS-CsChrimson-mVenus; +/SS33917						w;w,20xUAS-CsChrimson-mVenus; +/Empty-split-GA4						w;w,20xUAS-CsChrimson-mVenus; +/SS33918						w;w,20xUAS-CsChrimson-mVenus; +/SS33917						w;w,20xUAS-CsChrimson-mVenus; +/Empty-split-GA4						w;w,20xUAS-CsChrimson-mVenus; +/SS33918
Data Type	Forward walking speed (mm/s)		Angular speed (degree/second)		cos(upwind)		Empty foward		Empty angular		cos(upwind)		Forward walking speed (mm/s)		Angular speed (degree/second)		cos(upwind)		Forward walking speed (mm/s)		Angular speed (degree/second)		cos(upwind)		Empty foward		Empty angular		cos(upwind)		Forward walking speed (mm/s)		Angular speed (degree/second)		cos(upwind)
Time (s)	Mean	Confidence Interval	Mean	Confidence Interval	Mean	Confidence Interval	Mean	Confidence Interval	Mean	Confidence Interval	Mean	Confidence Interval	Mean	Confidence Interval	Mean	Confidence Interval	Mean	Confidence Interval	Mean	Confidence Interval	Mean	Confidence Interval	Mean	Confidence Interval	Mean	Confidence Interval	Mean	Confidence Interval	Mean	Confidence Interval	Mean	Confidence Interval	Mean	Confidence Interval	Mean	Confidence Interval
0.03333	1.6885	0.191	75.7851	9.2822	0.8083	0.0128	1.6244	0.2667	110.809	18.2854	0.8258	0.0161	2.1161	0.1882	85.0733	8.652	0.7979	0.0116	0.8558	0.0992	50.6019	6.4548	-0.837	0.0094	0.7938	0.1309	94.7732	15.1789	-0.8577	0.0114	0.7281	0.0775	46.2867	4.5548	-0.8454	0.0076
0.06667	1.9939	0.2389	105.328	17.555	0.8002	0.0155	1.6495	0.2836	127.36	24.0608	0.8152	0.0206	2.4651	0.196	113.403	12.4467	0.7957	0.0128	0.9199	0.1333	93.9109	11.8735	-0.8153	0.0116	0.8481	0.1686	101.19	16.1547	-0.8394	0.0139	0.8047	0.0914	76.0897	7.1356	-0.8315	0.0087
0.1	2.3036	0.2601	134.464	17.7667	0.7916	0.0186	1.6522	0.2648	169.955	23.2751	0.8068	0.0239	3.1366	0.2476	176.977	16.9995	0.7933	0.0152	1.0416	0.1214	183.565	15.7715	-0.763	0.016	0.8728	0.1294	163.647	18.1513	-0.8085	0.0171	1.0903	0.1041	181.28	13.233	-0.7837	0.0123
0.13333	2.3562	0.2643	149.531	17.972	0.7875	0.0204	1.627	0.2634	204.233	26.0232	0.782	0.0283	3.1927	0.2285	187.276	18.3668	0.7814	0.0184	1.1927	0.1191	231.428	17.471	-0.6804	0.0221	0.9929	0.1343	221.427	21.2106	-0.7508	0.0225	1.2325	0.1021	237.787	15.4382	-0.7025	0.0174
0.16667	2.3842	0.2725	143.052	16.5853	0.7779	0.0221	1.5779	0.241	180.739	22.67	0.7529	0.0333	2.9174	0.1972	154.468	16.1913	0.7627	0.0215	1.3683	0.1138	231.842	16.3409	-0.5844	0.0277	1.1572	0.1375	208.075	18.4233	-0.6851	0.0287	1.1946	0.0877	219.863	14.3265	-0.6151	0.0223
0.2	2.3698	0.2313	137.635	16.6075	0.7663	0.0239	1.5544	0.2209	158.729	20.0563	0.7278	0.0372	2.7011	0.1857	136.035	13.9344	0.7448	0.0243	1.4744	0.111	208.669	15.2496	-0.4923	0.0322	1.2623	0.1325	173.354	16.4617	-0.6304	0.0328	1.1195	0.0775	198.921	13.3558	-0.5337	0.0262
0.23333	2.2942	0.2209	131.711	16.1357	0.7544	0.026	1.5869	0.2103	155.664	24.7729	0.7021	0.0408	2.5705	0.1748	122.619	13.2307	0.7335	0.0263	1.5671	0.1134	181.174	13.7697	-0.4128	0.0357	1.2695	0.1269	141.709	14.4718	-0.5827	0.0363	1.0869	0.0738	183.676	13.0314	-0.4612	0.0293
0.26667	2.3625	0.2222	127.925	15.5486	0.7401	0.0275	1.5505	0.2052	127.204	18.6686	0.6825	0.0437	2.5745	0.1779	130.8	13.2934	0.723	0.0278	1.6642	0.1158	159.575	12.4808	-0.3474	0.0384	1.258	0.1254	127.763	13.8225	-0.5456	0.0389	1.116	0.0747	173.601	12.3945	-0.3969	0.0318
0.3	2.4396	0.2146	131.776	16.7158	0.7276	0.029	1.5168	0.2204	149.813	25.5503	0.668	0.0451	2.5065	0.1756	137.583	14.8119	0.7122	0.029	1.7297	0.1164	142.73	11.3807	-0.2933	0.0404	1.2506	0.1305	111.344	11.6633	-0.5134	0.0409	1.1077	0.0742	167.721	12.2579	-0.3378	0.0338
0.33333	2.5066	0.2298	126.773	16.2089	0.7141	0.0309	1.4245	0.2038	146.033	22.6907	0.6496	0.0465	2.5325	0.1769	142.303	14.8654	0.6981	0.0294	1.8175	0.1189	137.238	11.3977	-0.2463	0.042	1.2468	0.132	109.564	11.863	-0.487	0.0427	1.1864	0.0767	168.16	12.3001	-0.284	0.0354
0.36667	2.5482	0.2289	124.334	16.9616	0.695	0.0328	1.4792	0.235	154.459	25.5093	0.6292	0.0485	2.6455	0.185	139.881	15.4381	0.6854	0.0302	1.9888	0.1289	141.368	12.1678	-0.202	0.0433	1.3861	0.1757	123.525	17.5008	-0.4594	0.044	1.2905	0.0815	165.837	11.9108	-0.2377	0.0366
0.4	2.7807	0.2616	148.021	18.8182	0.6784	0.0339	1.4725	0.2384	160.705	23.2868	0.6073	0.0506	2.8817	0.194	147.556	15.4008	0.6752	0.0309	2.2447	0.1543	158.06	13.9582	-0.157	0.0444	1.3938	0.1767	136.525	16.2823	-0.436	0.0451	1.4451	0.0923	177.808	12.5974	-0.1961	0.0374
0.43333	3.0254	0.2606	181.164	18.4471	0.6665	0.0351	1.5933	0.2408	213.535	30.7369	0.5884	0.0528	3.3245	0.2161	194.78	17.6599	0.6767	0.0311	2.4685	0.1605	192.973	14.9166	-0.1107	0.0449	1.4456	0.1861	180.186	19.8025	-0.4082	0.0457	1.7933	0.112	229.357	13.4092	-0.1368	0.0378
0.46667	3.3464	0.2863	214.444	20.525	0.6524	0.0367	1.6907	0.2484	227.264	29.7958	0.5698	0.0564	3.6764	0.2334	223.022	19.6673	0.6762	0.0319	2.6671	0.1652	243.295	15.8055	-0.0457	0.0447	1.5879	0.163	215.055	18.0161	-0.371	0.0465	2.1762	0.1167	305.46	15.8242	-0.0464	0.0375
0.5	3.3719	0.265	233.683	21.3294	0.6341	0.0386	1.6508	0.2311	216.415	25.1418	0.5481	0.0588	3.4009	0.2168	211.246	19.7807	0.6719	0.0325	2.8638	0.1586	248.44	15.0284	0.0241	0.0442	1.7241	0.1643	227.941	17.5452	-0.3293	0.0469	2.3104	0.1133	295.591	14.5208	0.0475	0.0368
0.53333	3.4139	0.2635	236.019	21.8128	0.6138	0.0403	1.768	0.2438	193.363	24.028	0.5224	0.061	3.2215	0.203	188.016	17.3485	0.6683	0.0329	2.9516	0.1542	250.828	15.5167	0.0967	0.0434	1.8167	0.1598	197.19	15.7004	-0.2881	0.0474	2.2924	0.1056	267.875	13.8584	0.1335	0.036
0.56667	3.3579	0.2479	199.554	17.8875	0.5963	0.0416	1.7573	0.2219	166.826	21.8972	0.5008	0.0629	3.1242	0.2037	185.15	17.8279	0.6672	0.033	3.0661	0.1531	239.686	15.4053	0.1615	0.0426	1.8493	0.158	177.267	15.446	-0.2482	0.048	2.2964	0.1044	237.839	12.7996	0.2044	0.0351
0.6	3.4041	0.2514	185.673	17.8094	0.5804	0.0435	1.7786	0.2236	170.754	21.8481	0.4814	0.0623	3.1082	0.2072	186.845	17.5185	0.6674	0.0326	3.207	0.1538	224.596	14.5133	0.2129	0.042	1.8399	0.1583	155.695	13.3038	-0.2154	0.0486	2.383	0.1064	227.226	12.6903	0.2654	0.0343
0.63333	3.2672	0.2346	173.005	16.3239	0.5734	0.0445	1.7709	0.2226	160.12	21.6752	0.4585	0.0629	3.0819	0.2091	194.717	17.388	0.6663	0.0323	3.2908	0.1548	215.485	14.4924	0.2545	0.0415	1.857	0.1582	154.832	14.0109	-0.1862	0.0493	2.4872	0.11	215.915	12.6939	0.3193	0.0333
0.66667	3.24	0.2357	171.826	16.9677	0.5672	0.0451	1.8167	0.2299	145.279	20.6339	0.4491	0.063	3.0421	0.2111	199.275	18.2312	0.6634	0.0329	3.339	0.1554	201.262	13.1359	0.2869	0.0412	1.8449	0.1585	142.208	12.7755	-0.1559	0.0498	2.569	0.1122	211.358	12.1713	0.3671	0.0325
0.7	3.3334	0.2378	171.071	17.295	0.5678	0.0452	1.8428	0.2321	144.887	20.9315	0.4406	0.0626	3.0202	0.2034	199.277	18.281	0.6564	0.0341	3.4491	0.154	194.795	13.104	0.3142	0.0407	1.8648	0.159	142.527	13.0516	-0.1295	0.0499	2.6471	0.1125	206.51	11.7897	0.4069	0.0318
0.73333	3.4472	0.2471	172.09	17.8731	0.569	0.045	1.8585	0.2398	151.095	21.7153	0.4288	0.0632	3.067	0.2035	188.169	16.43	0.6495	0.035	3.5532	0.1581	188.335	13.6298	0.3356	0.0403	1.9223	0.1631	147.463	13.4571	-0.1041	0.0503	2.8188	0.1158	199.565	11.3715	0.4395	0.0311
0.76667	3.547	0.2409	181.826	18.218	0.5687	0.0449	1.8872	0.2471	143.683	19.4034	0.4194	0.0637	3.1367	0.2066	184.27	16.7889	0.646	0.035	3.6401	0.1578	186.894	12.8236	0.3557	0.0396	1.9506	0.1632	143.632	13.7446	-0.0842	0.0506	2.9586	0.1183	191.283	10.536	0.4656	0.0304
0.8	3.5948	0.2396	189.231	17.7438	0.5688	0.0448	1.9647	0.2544	139.214	18.5694	0.4048	0.0648	3.2184	0.214	173.49	15.4614	0.6437	0.0346	3.8033	0.1611	204.766	13.6976	0.3721	0.0389	1.972	0.1625	123.341	11.2387	-0.0648	0.0508	3.1298	0.1205	184.51	10.5234	0.4898	0.0297
0.83333	3.7178	0.2397	200.993	18.813	0.5579	0.0452	1.9871	0.2466	134.641	17.8219	0.3952	0.0653	3.1671	0.2177	177.933	17.2691	0.6367	0.0347	3.9381	0.1618	206.275	13.5548	0.3885	0.0385	1.9867	0.1593	128.344	12.325	-0.0441	0.0509	3.2535	0.1205	175.886	10.2981	0.5086	0.0291
0.86667	3.9161	0.2541	191.858	18.4017	0.5474	0.0456	1.967	0.2494	129.713	21.2388	0.3881	0.0654	3.1423	0.2152	180.737	16.4831	0.6236	0.0348	4.0227	0.1625	197.307	12.4683	0.3994	0.0382	2.0574	0.1673	131.184	12.0849	-0.0233	0.0511	3.3521	0.1248	165.868	9.8353	0.5239	0.0287
0.9	3.947	0.2431	199.726	20.2369	0.5375	0.0459	1.9244	0.2404	141.069	19.0286	0.3771	0.0661	3.1067	0.218	187.48	16.7946	0.6141	0.0346	4.0066	0.1622	190.536	13.1868	0.4085	0.0378	2.036	0.1664	125.148	11.822	-0.0075	0.0513	3.4599	0.1284	157.323	9.1551	0.538	0.0284
0.93333	3.9857	0.2395	200.427	18.3704	0.5231	0.0457	1.9985	0.2501	157.371	22.1712	0.3715	0.0653	3.0839	0.2124	176.361	15.7991	0.6082	0.035	4.0474	0.1673	189.37	12.8068	0.4126	0.0375	2.0664	0.1759	123.032	11.9433	0.0079	0.0513	3.5083	0.1315	161.136	9.7468	0.5492	0.0282
0.96667	4.0004	0.2435	193.948	18.4779	0.5149	0.046	2.0094	0.257	128.704	19.4137	0.362	0.0655	3.144	0.217	180.398	16.9128	0.605	0.0355	4.0863	0.1636	184.939	12.8717	0.4166	0.0374	2.0574	0.1716	125.901	12.1741	0.0207	0.0512	3.5606	0.1352	156.654	9.8018	0.5557	0.028
1	4.0739	0.2439	185.162	18.2281	0.5082	0.0463	2.0117	0.2582	136.521	22.3806	0.3476	0.066	3.1465	0.2145	179.105	16.4205	0.5993	0.0357	4.2055	0.1669	185.15	12.4901	0.4231	0.0373	2.0868	0.181	116.642	10.922	0.0341	0.0513	3.5494	0.1368	152.405	9.0678	0.5603	0.0277
1.03333	3.978	0.2428	191.673	19.5268	0.4999	0.0461	2.0232	0.254	130.867	16.6021	0.3429	0.0667	3.1269	0.2149	168.571	14.7312	0.594	0.0358	4.207	0.1634	179.702	11.7506	0.4269	0.0371	2.017	0.1706	122.399	12.8585	0.0434	0.0512	3.5707	0.1389	153.72	9.4353	0.5647	0.0275
1.06667	3.9564	0.2418	175.496	19.4692	0.4986	0.0454	1.9996	0.2641	126.528	18.2112	0.3361	0.0671	3.0959	0.2201	163.12	15.1816	0.5835	0.0358	4.2237	0.1676	184.223	12.0275	0.4308	0.0365	2.0556	0.1826	122.475	12.593	0.0547	0.0511	3.6114	0.1504	157.355	9.8706	0.5664	0.0272
1.1	3.955	0.2735	175.121	19.5927	0.4997	0.0448	2.0225	0.2732	138.741	22.3763	0.3285	0.0677	3.049	0.2085	154.975	14.3492	0.5776	0.0356	4.1835	0.1676	186.383	12.8758	0.4323	0.0363	1.9926	0.1697	126.573	13.2371	0.0662	0.051	3.5702	0.1414	157.621	9.6794	0.567	0.0272
1.13333	3.8255	0.259	181.196	18.2609	0.4981	0.0452	1.9005	0.255	142.938	18.6056	0.3243	0.0673	2.9924	0.2181	142.648	12.9664	0.572	0.0357	4.172	0.168	186.832	13.0315	0.4328	0.0363	2.0149	0.1747	131.517	13.6269	0.0787	0.051	3.5377	0.1514	150.534	9.1842	0.565	0.0272
1.16667	3.8521	0.252	168.715	16.7402	0.4943	0.0459	1.9009	0.2428	150.436	23.6223	0.3253	0.0665	2.8126	0.2063	149.409	14.0605	0.5679	0.036	4.1958	0.1768	183.837	12.394	0.4368	0.036	1.9794	0.1715	119.196	11.8277	0.0852	0.051	3.5127	0.1351	146.713	9.1095	0.5635	0.0271
1.2	3.829	0.2488	182.155	16.8723	0.4942	0.0458	1.9119	0.2361	146.499	21.8332	0.3166	0.067	2.7334	0.2063	156.922	14.9168	0.5647	0.0364	4.2811	0.1668	172.394	12.0071	0.441	0.0356	1.9561	0.1683	115.906	11.1357	0.0902	0.051	3.4951	0.1367	146.053	8.4978	0.5609	0.027
1.23333	3.91	0.2434	196.782	18.9795	0.4929	0.0458	1.8839	0.226	127.041	17.0057	0.3162	0.0669	2.6918	0.2106	170.726	16.787	0.5614	0.0366	4.3046	0.1625	171.286	12.0744	0.4428	0.0351	1.9517	0.1663	111.109	10.9676	0.0936	0.051	3.4736	0.1371	145.333	9.089	0.5605	0.0268
1.26667	3.8625	0.2431	185.883	18.753	0.4899	0.0456	1.8553	0.2307	127.094	18.3458	0.3144	0.0665	2.685	0.2023	168.719	15.7947	0.5548	0.0367	4.2383	0.1623	167.773	11.9046	0.4447	0.0345	1.9832	0.1672	112.636	10.7662	0.1047	0.0508	3.4036	0.1363	146.342	9.1818	0.5609	0.0266
1.3	3.8555	0.2411	161.642	16.2271	0.493	0.0455	1.8648	0.2393	128.186	19.0118	0.3128	0.0669	2.6951	0.2104	155.278	13.4548	0.5489	0.0369	4.2769	0.1678	168.874	12.4579	0.4481	0.0341	2.0084	0.1675	118.242	11.1015	0.1111	0.0508	3.3673	0.1364	148.771	9.1275	0.5593	0.0267
1.33333	3.8592	0.2528	166.246	16.783	0.4986	0.0457	1.7724	0.2401	139.947	21.3699	0.3148	0.067	2.6296	0.2031	156.459	14.72	0.5452	0.0367	4.2229	0.1633	170.812	11.6802	0.4504	0.0339	1.9687	0.1633	118.005	11.4411	0.1187	0.0508	3.3168	0.1349	149.509	8.6125	0.5582	0.0267
1.36667	3.8111	0.2482	189.114	19.8205	0.4983	0.0462	1.6782	0.2328	124.263	17.2708	0.3193	0.0669	2.6221	0.2074	159.387	14.8372	0.5433	0.0368	4.187	0.1674	179.022	12.7056	0.4531	0.0336	1.9604	0.1646	112.404	10.5929	0.1248	0.051	3.2642	0.1333	149.062	8.922	0.5551	0.0266
1.4	3.7178	0.2434	192.738	19.251	0.494	0.0465	1.6939	0.2294	124.61	20.9798	0.3196	0.067	2.5602	0.2016	159.689	14.57	0.5347	0.0373	4.1498	0.1668	178.429	12.0823	0.4545	0.0335	1.9619	0.1688	118.337	12.0007	0.1284	0.0511	3.2813	0.1461	151.181	9.415	0.5515	0.0265
1.43333	3.7729	0.2594	179.08	17.051	0.4889	0.0467	1.5963	0.2249	116.718	16.9963	0.3187	0.0673	2.6021	0.2007	152.42	14.702	0.528	0.0378	4.1832	0.1699	173.129	11.9866	0.4582	0.0334	1.9718	0.1622	113.702	10.9096	0.1277	0.051	3.2689	0.1341	148.49	8.657	0.5462	0.0266
1.46667	3.7573	0.2695	177.537	17.6348	0.4826	0.0467	1.6529	0.2247	131.467	22.3222	0.3203	0.0674	2.5542	0.198	141.179	12.1583	0.5259	0.038	4.1497	0.1649	177.369	12.1529	0.4588	0.0333	1.9493	0.1607	113.078	11.2019	0.1292	0.0508	3.2278	0.1351	145.304	8.2308	0.5436	0.0265
