# Supplementary material for: Neural circuit mechanisms for transforming learned olfactory valences into wind-oriented movement
Source: eLife. 2023 Sep 18;12:e85756. doi: 10.7554/eLife.85756 (PMC10588983; doi:10.7554/eLife.85756)
Supplement: Figure 6—source data 5. [file elife-85756-fig6-data5.xlsx]

## Sheet: Sheet1
Data type	Turn			Turn			Turn			Turn			Forward walking			Forward walking			Forward walking			Forward walking
Genotype	w;w,20xUAS-CsChrimson-mVenus; +/Empty-split-GAL4			w;w,20xUAS-CsChrimson-mVenus; +MB077B			w;w,20xUAS-CsChrimson-mVenus; +/SS33918			w;w,20xUAS-CsChrimson-mVenus; +/SS33917			w;w,20xUAS-CsChrimson-mVenus; +/Empty-split-GAL4			w;w,20xUAS-CsChrimson-mVenus; +MB077B			w;w,20xUAS-CsChrimson-mVenus; +/SS33918			w;w,20xUAS-CsChrimson-mVenus; +/SS33917
AverageInitial	Mean	confidence interval	N	Mean	confidence interval	N	Mean	confidence interval	N	Mean	confidence interval	N	Mean	confidence interval	N	Mean	confidence interval	N	Mean	confidence interval	N	Mean	confidence interval	N
-180	-2.8374	2.6299	474	-0.423	3.084	217	2.2771	2.4153	867	3.3863	2.8589	621	1.4838	0.0693	474	1.069	0.0697	217	1.8618	0.0449	867	2.3531	0.065	621
-179	-1.4729	2.6316	474	-0.2643	3.088	217	2.5196	2.4098	869	3.6239	2.8685	619	1.4811	0.0692	474	1.07	0.0697	217	1.8777	0.0453	869	2.3774	0.0659	619
-178	-1.8114	2.6609	472	-0.1173	3.067	218	3.4346	2.414	863	4.2338	2.86	620	1.4856	0.0694	472	1.0726	0.0695	218	1.8705	0.0455	863	2.3707	0.0654	620
-177	-2.6391	2.6645	464	-0.1284	3.0301	222	4.3728	2.4159	861	4.3719	2.8449	622	1.4909	0.0701	464	1.0772	0.0689	222	1.8652	0.0457	861	2.3844	0.0657	622
-176	-2.2695	2.6608	466	0.4795	3.0339	220	5.0379	2.4069	862	5.0547	2.8558	614	1.4977	0.0699	466	1.0622	0.0688	220	1.8602	0.0456	862	2.401	0.0665	614
-175	-2.0571	2.6622	457	0.7658	3.0326	218	6.1942	2.399	863	5.5555	2.8734	611	1.4925	0.07	457	1.0732	0.0694	218	1.863	0.0457	863	2.4021	0.0667	611
-174	-2.0634	2.6242	463	1.5043	2.9683	216	7.178	2.3552	873	6.7667	2.8471	612	1.4936	0.0701	463	1.0735	0.0697	216	1.8598	0.0453	873	2.4193	0.0672	612
-173	-1.4467	2.5875	460	2.0177	2.919	218	7.1313	2.3545	873	7.8881	2.8501	607	1.5016	0.0707	460	1.0648	0.0693	218	1.8647	0.0453	873	2.4182	0.0676	607
-172	-0.9343	2.5756	461	2.7163	2.8508	219	8.1057	2.3376	872	8.4671	2.8268	606	1.4994	0.0707	461	1.0328	0.0664	219	1.8524	0.0449	872	2.4176	0.0677	606
-171	-1.1235	2.5828	459	3.0117	2.8712	217	8.8113	2.3207	881	8.7198	2.8026	608	1.5081	0.071	459	1.0316	0.0669	217	1.859	0.0446	881	2.4156	0.0672	608
-170	-0.9607	2.5961	458	4.4159	2.8432	219	9.6095	2.3164	873	9.0422	2.838	593	1.4863	0.0683	458	1.0533	0.0674	219	1.8639	0.0452	873	2.4262	0.0684	593
-169	0.7871	2.5629	457	4.4584	2.8165	221	9.7587	2.3036	872	10.3542	2.8474	593	1.4821	0.0686	457	1.0433	0.0668	221	1.8632	0.0451	872	2.4328	0.0686	593
-168	1.0887	2.5524	456	4.5917	2.7916	223	10.4108	2.3121	867	10.4346	2.8419	591	1.4716	0.0688	456	1.0578	0.067	223	1.8657	0.0452	867	2.4505	0.0687	591
-167	1.2571	2.536	454	4.6011	2.8166	221	10.828	2.3036	858	10.7836	2.8336	593	1.4677	0.0688	454	1.0546	0.0678	221	1.8571	0.0452	858	2.448	0.0687	593
-166	1.4771	2.5328	448	6.2726	2.8104	216	11.866	2.3055	855	11.6891	2.8349	593	1.4683	0.0695	448	1.0502	0.0681	216	1.8598	0.0452	855	2.4649	0.069	593
-165	1.3662	2.5665	442	6.7569	2.769	217	12.864	2.308	841	12.0739	2.8575	583	1.4797	0.0709	442	1.0362	0.0679	217	1.8584	0.0456	841	2.4711	0.0698	583
-164	1.7269	2.5646	440	6.8783	2.8069	214	12.7867	2.291	839	12.3564	2.8624	579	1.4846	0.0715	440	1.0432	0.0687	214	1.8523	0.0456	839	2.4895	0.0707	579
-163	1.9571	2.5683	440	7.36	2.8631	211	13.4845	2.3076	835	13.4839	2.8334	578	1.489	0.0716	440	1.0657	0.0695	211	1.8622	0.0459	835	2.4804	0.0711	578
-162	2.265	2.5817	434	8.4826	2.8557	204	13.5076	2.2939	843	14.1238	2.8219	575	1.4875	0.0723	434	1.0693	0.0714	204	1.8759	0.0462	843	2.4944	0.071	575
-161	2.7306	2.5946	434	9.8055	2.7965	201	14.4255	2.2926	826	15.4343	2.793	582	1.4805	0.0721	434	1.0667	0.072	201	1.8824	0.0471	826	2.5037	0.071	582
-160	2.5667	2.6084	426	10.1803	2.7979	200	15.1697	2.3048	814	16.3776	2.7496	583	1.4875	0.0728	426	1.0488	0.0715	200	1.8974	0.0478	814	2.511	0.0715	583
-159	2.9284	2.6125	419	9.5623	2.8658	199	15.8351	2.3044	806	18.0606	2.7505	573	1.4953	0.0738	419	1.0652	0.072	199	1.8929	0.048	806	2.5104	0.0723	573
-158	2.2715	2.5932	411	9.5564	2.8999	197	16.325	2.2948	801	18.9443	2.7401	577	1.4759	0.0733	411	1.0682	0.0723	197	1.8883	0.0483	801	2.5305	0.0721	577
-157	2.7515	2.6044	412	9.5939	2.8113	193	16.9274	2.3081	791	19.9114	2.7369	572	1.4784	0.0731	412	1.0526	0.071	193	1.9064	0.0494	791	2.5365	0.0721	572
-156	3.2383	2.6077	406	9.7242	2.8444	190	17.055	2.288	794	20.4966	2.7861	561	1.4814	0.0723	406	1.0615	0.0717	190	1.9117	0.0493	794	2.5539	0.073	561
-155	3.3002	2.6165	399	10.3151	2.8291	187	17.3533	2.2749	785	20.8316	2.7974	560	1.4689	0.0711	399	1.05	0.0715	187	1.9036	0.0493	785	2.573	0.0734	560
-154	3.5439	2.651	390	10.1458	2.8522	183	18.1312	2.2694	791	22.0655	2.7906	551	1.4712	0.0718	390	1.061	0.0723	183	1.9286	0.0503	791	2.5935	0.0744	551
-153	4.2827	2.6586	385	10.316	2.8563	183	19.5008	2.2497	781	22.1853	2.787	547	1.4661	0.072	385	1.0667	0.0722	183	1.9346	0.0506	781	2.6067	0.075	547
-152	5.1582	2.7043	376	9.5741	2.7867	182	19.5348	2.2594	772	22.3374	2.7816	546	1.464	0.0732	376	1.0607	0.0711	182	1.9423	0.0511	772	2.6178	0.0753	546
-151	5.6369	2.6859	373	10.256	2.8313	180	19.9561	2.2431	773	22.9806	2.812	540	1.4454	0.0718	373	1.065	0.0715	180	1.9509	0.0509	773	2.6256	0.0757	540
-150	6.3847	2.6778	370	11.6289	2.8986	174	20.9278	2.2346	772	23.6232	2.7744	543	1.44	0.0717	370	1.1055	0.0752	174	1.9531	0.0511	772	2.618	0.0755	543
-149	6.6202	2.6514	370	11.2192	2.8861	173	21.2196	2.2344	766	24.2762	2.7646	541	1.4355	0.0712	370	1.0968	0.0751	173	1.9566	0.0515	766	2.636	0.0759	541
-148	6.8782	2.6489	367	11.8168	2.9791	162	22.2569	2.2383	755	24.306	2.7274	536	1.4403	0.0715	367	1.1224	0.0782	162	1.965	0.0519	755	2.6222	0.0758	536
-147	7.8633	2.6889	358	11.7802	3.02	161	22.5938	2.2282	751	25.2168	2.7365	527	1.438	0.0726	358	1.1181	0.0784	161	1.9803	0.053	751	2.6313	0.0769	527
-146	8.4889	2.6557	354	10.8947	2.9995	158	23.6401	2.1986	746	26.2269	2.7295	530	1.4019	0.0711	354	1.1323	0.0785	158	1.9892	0.053	746	2.6555	0.0766	530
-145	8.0298	2.6442	351	11.296	3.0089	158	23.8871	2.194	742	26.4999	2.7359	529	1.4163	0.0714	351	1.1323	0.0783	158	1.9873	0.0532	742	2.6731	0.0768	529
-144	8.4016	2.6923	347	12.2595	2.983	156	23.5964	2.1896	743	26.7414	2.7294	525	1.4198	0.0718	347	1.193	0.0851	156	1.991	0.0531	743	2.6692	0.0773	525
-143	8.1136	2.6901	345	12.37	3.0207	154	24.1074	2.1984	734	27.7478	2.6651	530	1.3854	0.0713	345	1.2069	0.0859	154	2.0024	0.0537	734	2.6648	0.0774	530
-142	8.208	2.6631	342	12.4243	3.04	153	25.0367	2.1744	730	27.5036	2.6519	532	1.3989	0.0724	342	1.214	0.0861	153	2.0214	0.0544	730	2.6843	0.0777	532
-141	8.2455	2.6967	334	13.3401	3.049	150	24.8501	2.1555	729	27.646	2.6535	533	1.4078	0.0734	334	1.1976	0.0858	150	2.0299	0.0545	729	2.7027	0.0777	533
-140	8.7081	2.699	332	13.192	2.9921	146	24.5447	2.1571	726	27.3753	2.6826	536	1.4166	0.0738	332	1.2044	0.0869	146	2.0254	0.0546	726	2.726	0.078	536
-139	8.4613	2.7479	331	11.8214	2.9183	143	24.6547	2.1402	722	27.3308	2.69	534	1.4465	0.0751	331	1.2059	0.0884	143	2.0158	0.0544	722	2.7286	0.0782	534
-138	8.1506	2.7401	329	10.9907	2.8793	142	24.7101	2.1508	715	28.2193	2.6796	526	1.4591	0.0747	329	1.2028	0.0878	142	2.0278	0.0548	715	2.7473	0.0791	526
-137	8.3324	2.7375	326	10.9318	2.9256	140	24.8443	2.1479	706	28.8155	2.6838	524	1.4457	0.0749	326	1.243	0.0903	140	2.0365	0.0552	706	2.7492	0.0787	524
-136	8.9017	2.6852	329	10.8972	2.8795	137	24.9512	2.1306	700	29.7288	2.6478	522	1.4415	0.0745	329	1.2688	0.0905	137	2.0242	0.0559	700	2.7523	0.0791	522
-135	9.0825	2.6924	330	11.3881	2.8922	136	25.5061	2.129	694	29.8846	2.6323	520	1.484	0.0756	330	1.2901	0.0913	136	2.058	0.0566	694	2.7573	0.0792	520
-134	9.7482	2.6853	319	11.797	2.9577	133	25.8001	2.1246	689	29.973	2.5993	522	1.4758	0.0771	319	1.3333	0.0943	133	2.0791	0.0572	689	2.7625	0.0793	522
-133	10.7999	2.7119	314	12.1593	2.9541	132	26.3559	2.0897	687	30.6919	2.5469	525	1.5059	0.0785	314	1.2981	0.0911	132	2.0885	0.0572	687	2.7673	0.0791	525
-132	10.7507	2.7206	313	12.5112	2.9806	131	26.1608	2.0692	687	30.1283	2.4833	537	1.5236	0.0788	313	1.3294	0.0942	131	2.1041	0.0571	687	2.7639	0.0789	537
-131	10.8321	2.7761	308	11.9617	2.9903	133	25.9893	2.071	681	30.1576	2.4519	539	1.5419	0.0795	308	1.3511	0.0942	133	2.1255	0.0576	681	2.7835	0.0787	539
-130	9.8814	2.8058	304	12.1762	3.0203	132	26.1678	2.0608	671	30.284	2.4048	529	1.5161	0.0779	304	1.3824	0.0951	132	2.1369	0.0581	671	2.7857	0.0798	529
-129	9.9879	2.8149	304	11.2796	3.1255	131	26.5104	2.0263	679	30.32	2.4166	524	1.5164	0.0778	304	1.3923	0.0953	131	2.1426	0.0577	679	2.7891	0.0798	524
-128	10.12	2.8464	304	11.2141	3.1572	128	27.1294	2.0078	674	30.341	2.4251	519	1.5533	0.0807	304	1.4144	0.0965	128	2.162	0.0577	674	2.8053	0.0802	519
-127	10.3475	2.8637	302	11.0422	3.1636	127	26.9403	2.0064	673	30.8296	2.3819	520	1.5527	0.0811	302	1.4525	0.0973	127	2.1864	0.0578	673	2.8244	0.0805	520
-126	10.9914	2.8658	298	11.4635	3.1733	126	27.4132	2.0037	666	31.2705	2.3616	517	1.554	0.0812	298	1.4712	0.0983	126	2.2149	0.0579	666	2.8527	0.0808	517
-125	10.8144	2.8832	297	11.6288	3.2225	124	28.0638	2.0025	662	31.0623	2.3601	516	1.5407	0.0811	297	1.4871	0.0991	124	2.232	0.0585	662	2.8677	0.0812	516
-124	10.8147	2.9578	289	11.7639	3.2461	123	27.6442	1.9838	657	30.9548	2.3515	509	1.5512	0.0808	289	1.4945	0.0996	123	2.2549	0.0595	657	2.8732	0.0808	509
-123	11.8834	2.9346	291	11.0445	3.2031	119	27.4577	1.9572	650	31.3349	2.2887	505	1.53	0.0802	291	1.4933	0.1009	119	2.2708	0.0604	650	2.8658	0.0805	505
-122	12.2187	2.9752	288	11.2462	3.1484	122	27.8767	1.9673	641	31.2975	2.2845	506	1.5327	0.0802	288	1.5028	0.1	122	2.2839	0.0612	641	2.8761	0.0804	506
-121	13.0697	2.9686	290	11.8591	3.1994	118	27.9608	1.9563	634	30.7416	2.2594	513	1.5095	0.0789	290	1.5247	0.1043	118	2.2967	0.0618	634	2.8832	0.0805	513
-120	12.8506	3.0027	284	12.1812	3.2304	117	27.4125	1.926	637	30.9489	2.2169	515	1.5158	0.0804	284	1.5868	0.1079	117	2.2934	0.0625	637	2.9181	0.0815	515
-119	11.8928	3.0094	279	12.023	3.2253	117	28.0363	1.9096	639	31.0949	2.1846	520	1.5159	0.0816	279	1.5811	0.108	117	2.2969	0.0622	639	2.9052	0.0801	520
-118	12.8779	2.9639	279	12.8522	3.2912	115	28.141	1.9019	641	31.328	2.1711	517	1.5396	0.0829	279	1.5975	0.1091	115	2.3137	0.0623	641	2.9116	0.0806	517
-117	12.9329	2.9267	283	13.3778	3.3725	114	27.9107	1.9125	640	31.5876	2.177	513	1.5295	0.0821	283	1.6572	0.1129	114	2.324	0.0622	640	2.9082	0.0811	513
-116	12.5325	2.9468	280	13.8901	3.4454	115	27.7886	1.923	637	30.7632	2.164	514	1.5272	0.0826	280	1.7024	0.1167	115	2.3453	0.063	637	2.8736	0.0806	514
-115	12.8627	2.935	279	14.2617	3.368	116	27.0726	1.9256	630	30.8719	2.1492	509	1.5171	0.083	279	1.6916	0.1154	116	2.3558	0.0632	630	2.8745	0.0808	509
-114	13.3143	2.9954	272	14.2032	3.3396	117	27.5198	1.9406	622	30.304	2.1634	504	1.5217	0.0826	272	1.6934	0.1144	117	2.3634	0.0638	622	2.8756	0.081	504
-113	13.4137	3.0062	271	13.9716	3.4427	115	27.7723	1.9157	623	30.0821	2.1547	504	1.5158	0.0825	271	1.7258	0.1144	115	2.3666	0.0638	623	2.881	0.0811	504
-112	14.0796	3.0876	267	15.2861	3.4734	114	27.6141	1.9128	620	30.6764	2.1776	498	1.5362	0.0832	267	1.8058	0.1166	114	2.3936	0.0644	620	2.9078	0.0817	498
-111	14.4763	3.0466	269	14.9123	3.5222	115	27.1387	1.9313	611	31.1568	2.1584	495	1.5276	0.0828	269	1.808	0.1163	115	2.3982	0.065	611	2.9002	0.0822	495
-110	14.6305	3.0686	267	14.0235	3.5928	111	26.8908	1.9306	605	31.4449	2.1481	500	1.5451	0.0843	267	1.8152	0.1184	111	2.3924	0.0651	605	2.9153	0.0822	500
-109	13.8458	3.0788	263	14.2252	3.656	109	27.0933	1.9281	609	30.9701	2.133	496	1.526	0.0832	263	1.8394	0.119	109	2.4214	0.0648	609	2.9191	0.0821	496
-108	14.4266	3.1276	260	15.1782	3.6639	106	26.6406	1.9185	612	30.8415	2.1345	494	1.5477	0.0839	260	1.8292	0.122	106	2.4357	0.0652	612	2.9318	0.0822	494
-107	14.1782	3.1546	257	14.7739	3.6522	108	27.0061	1.9169	614	31.1824	2.1511	490	1.5589	0.0847	257	1.8132	0.1204	108	2.463	0.0655	614	2.9689	0.0828	490
-106	14.3627	3.1598	259	14.0184	3.5719	108	26.6714	1.9203	607	30.7285	2.1553	494	1.5533	0.0844	259	1.8315	0.1231	108	2.4725	0.066	607	2.9781	0.0825	494
-105	14.4073	3.1385	260	14.1696	3.64	106	26.5642	1.9148	606	30.7529	2.1617	492	1.5501	0.0834	260	1.8594	0.1232	106	2.4845	0.0663	606	2.9824	0.0827	492
-104	14.8494	3.1363	257	14.0649	3.6073	107	27.1337	1.9085	600	30.7786	2.1542	490	1.5569	0.0825	257	1.865	0.1222	107	2.4991	0.067	600	2.972	0.0825	490
-103	14.6829	3.1301	257	13.2396	3.6361	104	27.0752	1.8682	599	29.9861	2.1978	484	1.5756	0.0856	257	1.8652	0.1257	104	2.5135	0.0669	599	2.9775	0.0824	484
-102	15.7354	3.1542	258	12.1542	3.7613	105	27.214	1.8644	589	29.6006	2.2054	479	1.604	0.0854	258	1.8622	0.1245	105	2.5118	0.0672	589	2.9753	0.0828	479
-101	14.8162	3.1567	257	12.3932	3.7484	104	27.0062	1.8672	588	29.1414	2.2339	466	1.6189	0.086	257	1.8698	0.1254	104	2.5007	0.0669	588	2.9749	0.0838	466
-100	15.2787	3.1428	258	12.3044	3.8129	102	27.1049	1.8648	595	28.9915	2.2524	459	1.6083	0.0854	258	1.916	0.1256	102	2.5028	0.0662	595	2.9735	0.0847	459
-99	15.2419	3.1185	258	13.3222	3.7005	101	26.7438	1.8489	599	29.0446	2.2531	461	1.6283	0.087	258	1.946	0.1288	101	2.5423	0.0675	599	2.967	0.0842	461
-98	14.9936	3.0814	262	13.5	3.6094	103	26.7628	1.8544	596	28.5187	2.2596	453	1.6431	0.0864	262	1.9717	0.1273	103	2.566	0.0675	596	2.9676	0.0853	453
-97	15.4084	3.0944	260	13.6991	3.6148	103	26.4951	1.8418	598	27.8648	2.2308	458	1.6398	0.087	260	1.9745	0.1273	103	2.5762	0.0675	598	2.9666	0.0847	458
-96	15.3276	3.0838	262	13.8819	3.5764	104	26.638	1.8125	590	27.782	2.2769	462	1.622	0.0851	262	1.9969	0.1251	104	2.6082	0.0687	590	2.9743	0.0844	462
-95	15.3399	3.0657	265	13.7092	3.5463	105	26.5361	1.8115	591	27.8175	2.2237	460	1.6165	0.0839	265	1.9927	0.124	105	2.6202	0.0692	591	2.9684	0.0849	460
-94	14.7018	3.063	263	13.6466	3.5558	104	25.9494	1.8111	586	26.5724	2.2466	462	1.5994	0.0837	263	2.0376	0.1256	104	2.5978	0.0684	586	2.9662	0.0844	462
-93	14.7234	3.0536	261	13.5137	3.6156	102	25.5963	1.7992	582	27.0929	2.2608	459	1.5875	0.0845	261	2.0483	0.1277	102	2.5962	0.0689	582	2.971	0.0844	459
-92	14.6034	3.0282	262	13.7917	3.643	101	25.8225	1.7896	582	26.8938	2.2848	459	1.5944	0.0844	262	2.05	0.1296	101	2.5959	0.0688	582	2.9438	0.0848	459
-91	15.5856	3.0312	262	12.8176	3.655	100	25.0968	1.8203	578	26.9967	2.2929	450	1.6085	0.0857	262	2.0488	0.1312	100	2.5982	0.0692	578	2.9534	0.0861	450
-90	15.6948	3.0286	262	12.8411	3.6577	99	24.8176	1.8254	586	26.9545	2.3193	441	1.6218	0.0859	262	2.0482	0.1332	99	2.6088	0.0686	586	2.9677	0.0871	441
-89	16.1464	3.0382	261	12.415	3.5993	101	24.9833	1.8255	581	26.5704	2.3257	436	1.6291	0.0864	261	2.0109	0.1332	101	2.6327	0.0688	581	2.9424	0.0872	436
-88	16.7756	3.0171	262	11.9645	3.5922	102	24.571	1.8212	579	26.2127	2.3099	436	1.633	0.0864	262	2.0097	0.1319	102	2.6374	0.0691	579	2.9384	0.0871	436
-87	16.9214	3.015	262	10.8505	3.5067	101	24.4456	1.8198	575	25.9635	2.2989	436	1.647	0.0864	262	2.0011	0.1332	101	2.6253	0.0684	575	2.924	0.0872	436
-86	17.1603	3.0544	258	10.3212	3.5327	100	24.6572	1.806	571	24.8269	2.2948	432	1.662	0.0874	258	2.0073	0.1364	100	2.642	0.069	571	2.9248	0.0888	432
-85	16.6686	3.1076	254	9.2216	3.5167	100	24.3742	1.8222	570	24.4137	2.3043	429	1.6561	0.0888	254	2.0372	0.1352	100	2.6547	0.0692	570	2.9104	0.0895	429
-84	16.3468	3.1068	252	8.3947	3.5688	97	24.5329	1.8326	556	24.3454	2.3216	425	1.6452	0.0892	252	2.002	0.1323	97	2.6657	0.0706	556	2.941	0.0897	425
-83	16.8697	3.1096	249	8.4698	3.6054	96	24.6712	1.843	555	24.0911	2.3497	415	1.6579	0.0897	249	2.0078	0.1336	96	2.6795	0.0719	555	2.9482	0.0902	415
-82	16.5717	3.1207	246	7.6471	3.5234	100	24.2341	1.8317	554	23.8787	2.3523	411	1.6576	0.0901	246	2.0023	0.13	100	2.6717	0.0717	554	2.9212	0.0906	411
-81	16.6391	3.1492	244	7.7932	3.4891	101	24.2258	1.8545	550	24.0497	2.359	407	1.6632	0.0907	244	2.0776	0.134	101	2.7001	0.0721	550	2.9357	0.0908	407
-80	16.4253	3.1556	243	7.2768	3.4384	102	24.3055	1.8445	548	23.8543	2.2741	402	1.6591	0.0909	243	2.0923	0.1317	102	2.7152	0.0722	548	2.9178	0.0906	402
-79	16.8821	3.1547	237	7.3537	3.4717	101	23.8098	1.8419	546	24.0187	2.2322	397	1.6514	0.0908	237	2.1059	0.1323	101	2.7263	0.0724	546	2.9288	0.092	397
-78	16.6864	3.1767	235	7.5578	3.5628	98	23.823	1.7951	547	23.2667	2.2166	400	1.6638	0.0918	235	2.1182	0.1347	98	2.7332	0.0726	547	2.9261	0.0913	400
-77	16.3372	3.129	235	7.3851	3.5798	98	24.1538	1.8151	543	22.8758	2.2379	394	1.6585	0.0916	235	2.0799	0.1348	98	2.748	0.0728	543	2.9557	0.0927	394
-76	16.2474	3.1663	233	6.7286	3.6194	95	24.1396	1.8137	541	22.2432	2.234	391	1.6774	0.0928	233	2.1131	0.1382	95	2.7754	0.0717	541	2.9624	0.0933	391
-75	16.4433	3.2029	228	6.4326	3.7236	92	23.9281	1.8298	534	21.8116	2.2337	390	1.6324	0.0925	228	2.1089	0.1426	92	2.7732	0.072	534	2.9598	0.093	390
-74	15.4197	3.1914	231	6.0356	3.7099	92	23.8118	1.8433	532	21.6799	2.2605	381	1.6351	0.0912	231	2.0664	0.1427	92	2.7792	0.072	532	2.9633	0.0942	381
-73	15.7225	3.2537	229	6.3414	3.7381	91	23.3848	1.8433	526	21.1295	2.2791	377	1.6157	0.0915	229	2.0836	0.1432	91	2.7616	0.0729	526	2.9605	0.0948	377
-72	15.9264	3.2756	228	6.9161	3.9025	91	22.783	1.8437	521	21.1362	2.3415	365	1.6098	0.0923	228	2.0274	0.1431	91	2.7839	0.0744	521	2.9731	0.0949	365
-71	16.4014	3.2336	224	7.8034	3.9277	88	22.8173	1.8658	516	20.9318	2.3552	358	1.6041	0.0929	224	2.0117	0.1478	88	2.8041	0.0748	516	2.9554	0.0962	358
-70	16.8519	3.1896	224	7.6207	4.0015	86	22.5724	1.874	509	20.5029	2.3611	356	1.625	0.0935	224	1.9959	0.1507	86	2.8026	0.0755	509	2.951	0.0967	356
-69	16.1349	3.173	222	9.466	3.9395	85	22.4165	1.8931	496	20.0429	2.3393	354	1.6129	0.0938	222	2.068	0.1529	85	2.8237	0.0767	496	2.9755	0.0974	354
-68	16.1851	3.1501	219	9.1238	3.9679	85	22.1646	1.9016	489	19.9608	2.3417	352	1.5735	0.0894	219	2.1066	0.1539	85	2.8412	0.0778	489	2.9676	0.0979	352
-67	15.251	3.1962	218	8.8121	4.0014	84	21.9428	1.9173	485	18.954	2.323	352	1.58	0.0911	218	2.0934	0.1552	84	2.8481	0.0785	485	2.948	0.0973	352
-66	15.0631	3.1952	217	8.6856	3.9566	85	21.5987	1.9237	483	18.3897	2.3447	347	1.5824	0.0914	217	2.0875	0.1558	85	2.8455	0.0794	483	2.9261	0.098	347
-65	15.7733	3.1686	213	8.6865	3.9103	86	21.3334	1.9148	480	17.1842	2.3444	346	1.6262	0.0949	213	2.0757	0.1544	86	2.84	0.0794	480	2.903	0.098	346
-64	16.5338	3.1115	214	8.7817	3.9554	85	20.9308	1.9257	474	17.0691	2.3377	343	1.6223	0.0946	214	2.0872	0.1558	85	2.8385	0.0803	474	2.9137	0.0987	343
-63	17.4938	3.1333	208	8.7817	3.9554	85	20.2472	1.9222	476	16.1907	2.3524	335	1.6604	0.0971	208	2.0872	0.1558	85	2.8435	0.08	476	2.9093	0.1003	335
-62	17.1947	3.0886	209	7.2709	4.0299	82	19.8948	1.927	470	16.0227	2.3628	333	1.6419	0.0963	209	2.1043	0.1599	82	2.8492	0.0805	470	2.879	0.1012	333
-61	16.3066	3.0817	207	7.1293	4.024	82	19.9326	1.9477	466	16.3142	2.4004	323	1.6536	0.0971	207	2.081	0.1586	82	2.8515	0.0808	466	2.8886	0.1024	323
-60	16.4335	3.0388	210	6.4583	4.0913	80	20.0337	1.9693	452	16.2885	2.4076	318	1.6725	0.0976	210	2.0437	0.1586	80	2.8639	0.0812	452	2.8291	0.1006	318
-59	16.2557	3.0352	211	6.3508	4.142	79	19.3498	2.0056	443	15.5479	2.4605	309	1.6866	0.0976	211	2.058	0.16	79	2.8619	0.0825	443	2.8356	0.103	309
-58	14.7618	3.1599	211	5.7252	4.0939	79	18.8133	2.0267	432	14.9971	2.4441	312	1.6684	0.0967	211	2.0611	0.1602	79	2.8766	0.0842	432	2.8585	0.1028	312
-57	14.2103	3.1841	208	5.3918	3.9191	78	18.086	2.0032	427	13.735	2.4747	310	1.6824	0.0974	208	2.0233	0.1584	78	2.8933	0.0859	427	2.8626	0.1031	310
-56	14.2191	3.1839	208	3.9624	3.6877	77	18.0789	1.9959	424	13.6607	2.478	312	1.6737	0.0977	208	1.9909	0.1547	77	2.8914	0.0855	424	2.8953	0.1032	312
-55	14.0249	3.1395	212	4.4186	3.7403	78	18.0116	1.9938	425	14.1122	2.4836	312	1.659	0.0966	212	1.9994	0.154	78	2.8976	0.0856	425	2.9229	0.104	312
-54	13.7387	3.1261	211	4.0506	3.7546	78	17.5761	1.9998	417	14.19	2.4816	308	1.653	0.0975	211	2.0256	0.156	78	2.9191	0.0866	417	2.9014	0.1051	308
-53	13.2266	3.1284	213	4.2843	3.7205	77	17.526	2.0164	415	13.7176	2.4934	308	1.649	0.0968	213	2.0588	0.1586	77	2.9481	0.087	415	2.9221	0.1063	308
-52	12.3755	3.0857	212	1.8913	3.716	72	16.9174	2.0269	412	13.1338	2.4871	305	1.6346	0.0966	212	2.0459	0.1625	72	2.9463	0.0871	412	2.9018	0.1063	305
-51	12.7172	3.1751	206	2.182	3.5954	71	16.2925	2.0639	410	12.556	2.495	301	1.6485	0.0982	206	2.0477	0.1635	71	2.957	0.0871	410	2.9159	0.107	301
-50	12.2124	3.1725	207	1.7887	3.5896	71	15.882	2.0648	407	12.0342	2.4711	298	1.6331	0.0971	207	2.0333	0.1643	71	2.98	0.0877	407	2.8946	0.1069	298
-49	12.6986	3.1332	210	2.2825	3.5546	72	15.6764	2.0747	403	11.4035	2.4739	297	1.6392	0.0973	210	2.1025	0.1675	72	2.9517	0.0905	403	2.8634	0.1085	297
-48	11.6766	3.1659	208	2.2443	3.5463	72	15.3117	2.0694	397	10.7712	2.5006	296	1.6436	0.0969	208	2.1502	0.1674	72	2.9461	0.0912	397	2.8457	0.1082	296
-47	11.2195	3.1597	206	2.4354	3.5355	70	14.126	2.0597	394	10.0227	2.4724	298	1.6422	0.0974	206	2.187	0.1698	70	2.9259	0.0913	394	2.8121	0.1065	298
-46	11.4694	3.1258	200	2.2575	3.5825	69	14.1744	2.0634	393	9.4369	2.4482	290	1.652	0.0996	200	2.1501	0.1682	69	2.9443	0.0923	393	2.7947	0.1068	290
-45	11.3707	3.1589	198	2.8779	3.5463	70	13.9591	2.0791	391	9.3014	2.4344	293	1.6405	0.0991	198	2.1708	0.1659	70	2.9243	0.093	391	2.7828	0.1065	293
-44	10.7346	3.1635	197	2.8767	3.5981	69	13.676	2.1087	392	8.36	2.4957	296	1.6245	0.0998	197	2.1666	0.1683	69	2.8971	0.0931	392	2.7898	0.1062	296
-43	11.0958	3.2021	197	2.4685	3.5697	70	13.7398	2.1339	384	8.7858	2.4609	293	1.6169	0.096	197	2.1811	0.1665	70	2.9008	0.0947	384	2.7925	0.1073	293
-42	9.5689	3.1894	194	3.6412	3.2574	70	13.4433	2.1376	384	7.7261	2.5403	291	1.6073	0.0972	194	2.1932	0.1663	70	2.908	0.0947	384	2.8329	0.1109	291
-41	10.0247	3.1797	191	3.7922	3.2988	69	12.7074	2.1899	384	7.4455	2.5313	292	1.5892	0.0974	191	2.2302	0.1727	69	2.9192	0.0948	384	2.8383	0.112	292
-40	10.5292	3.1307	187	4.2122	3.3205	68	12.1338	2.195	374	7.3442	2.5497	288	1.621	0.1002	187	2.2272	0.1752	68	2.9194	0.0972	374	2.8345	0.1125	288
-39	8.4739	3.2633	189	3.277	3.2907	67	11.5419	2.2823	366	6.5024	2.5352	283	1.616	0.0991	189	2.1937	0.1754	67	2.8899	0.0959	366	2.8376	0.1139	283
-38	8.662	3.3125	185	3.047	3.3284	66	11.4827	2.3055	362	5.9655	2.5146	284	1.5905	0.1002	185	2.2102	0.1795	66	2.9003	0.0972	362	2.8312	0.114	284
-37	7.5467	3.2894	182	2.6373	3.2471	67	11.1066	2.3373	355	5.5498	2.5813	280	1.6168	0.1016	182	2.1477	0.1828	67	2.8711	0.0973	355	2.8291	0.1158	280
-36	7.4478	3.3147	180	-0.4966	4.286	66	10.5787	2.3625	348	4.9893	2.4912	272	1.6359	0.1026	180	2.1369	0.1853	66	2.845	0.0982	348	2.8223	0.1181	272
-35	7.709	3.3001	180	0.0118	4.1732	68	10.355	2.3744	344	4.6966	2.5107	268	1.5953	0.1034	180	2.096	0.1835	68	2.8419	0.0986	344	2.7906	0.1178	268
-34	8.2319	3.3213	180	-0.4011	4.2151	67	9.9315	2.3876	336	5.5476	2.4408	263	1.6306	0.1041	180	2.0644	0.1834	67	2.8663	0.1005	336	2.7615	0.1198	263
-33	8.4297	3.3542	178	-0.4023	4.1527	68	9.9265	2.396	335	4.6402	2.4363	259	1.6618	0.1046	178	2.0557	0.1809	68	2.8601	0.1007	335	2.761	0.1215	259
-32	8.072	3.3565	179	-0.3694	4.0943	69	9.1206	2.4278	333	4.3041	2.3805	259	1.645	0.1044	179	2.0886	0.1803	69	2.8559	0.1012	333	2.7722	0.1207	259
-31	8.5785	3.3944	178	-0.0537	4.1426	68	9.209	2.3779	330	4.2016	2.3597	263	1.6257	0.1038	178	2.1064	0.1821	68	2.8827	0.1039	330	2.7937	0.1201	263
-30	8.6923	3.4361	177	-0.5462	4.1751	67	8.0226	2.3595	315	3.4481	2.3533	262	1.648	0.1101	177	2.0761	0.1822	67	2.891	0.1073	315	2.796	0.121	262
-29	8.1592	3.4148	178	-0.296	4.297	65	7.7491	2.3738	312	4.1591	2.4118	265	1.6195	0.1095	178	2.135	0.1829	65	2.8646	0.1077	312	2.8014	0.1198	265
-28	7.7033	3.4887	174	0.2234	4.3327	64	7.4559	2.3685	310	4.3923	2.421	264	1.6512	0.113	174	2.1388	0.1858	64	2.8509	0.1081	310	2.8258	0.1219	264
-27	7.0447	3.5591	173	0.2391	4.402	63	7.2101	2.3767	305	4.2471	2.4549	260	1.6342	0.1147	173	2.1546	0.188	63	2.9073	0.1114	305	2.8441	0.1229	260
-26	6.7497	3.532	174	0.7724	4.4588	62	5.8737	2.4065	308	3.7592	2.4635	258	1.62	0.1145	174	2.1282	0.1891	62	2.8905	0.1104	308	2.8426	0.1225	258
-25	6.675	3.4723	177	1.2129	4.5962	60	6.4551	2.484	304	3.031	2.4396	257	1.615	0.113	177	2.1235	0.1951	60	2.9009	0.1117	304	2.8729	0.1233	257
-24	6.7837	3.4702	177	0.8139	4.4654	62	6.3969	2.4377	311	2.8231	2.4236	255	1.6525	0.1159	177	2.0739	0.1924	62	2.9321	0.1096	311	2.8539	0.1242	255
-23	6.5627	3.5212	176	0.9009	4.3948	63	5.555	2.44	309	2.366	2.4192	254	1.6767	0.1171	176	2.0518	0.1906	63	2.9136	0.1082	309	2.8547	0.1247	254
-22	6.5468	3.5196	176	2.4872	4.5644	60	5.3861	2.4917	299	2.1841	2.4264	251	1.7013	0.1197	176	2.1317	0.2082	60	2.9228	0.1109	299	2.8596	0.1255	251
-21	6.1642	3.5093	177	1.283	4.6108	59	4.4298	2.4905	299	1.5135	2.4425	247	1.748	0.1212	177	2.0556	0.2004	59	2.9161	0.1131	299	2.8505	0.1269	247
-20	6.2326	3.5877	173	-0.2938	4.8243	59	4.0297	2.4938	296	1.5079	2.4802	242	1.7676	0.1234	173	2.0944	0.2033	59	2.9276	0.1138	296	2.8665	0.1292	242
-19	6.2326	3.5877	173	-0.4354	4.7453	60	4.0321	2.5121	292	1.3235	2.527	238	1.7676	0.1234	173	2.0994	0.2	60	2.9333	0.1149	292	2.8645	0.1286	238
-18	6.4109	3.6253	171	-1.4682	4.6493	61	4.1359	2.5377	288	0.9717	2.5508	236	1.7531	0.1242	171	2.1073	0.1975	61	2.9125	0.1157	288	2.8609	0.1304	236
-17	5.647	3.6979	168	-0.9088	4.6931	60	3.7971	2.506	292	0.2828	2.4862	235	1.764	0.1261	168	2.1393	0.1981	60	2.8725	0.1156	292	2.8673	0.1309	235
-16	5.4398	3.7193	167	-0.9265	4.7733	59	3.7609	2.5547	285	-0.2515	2.5247	232	1.7384	0.1259	167	2.1221	0.2008	59	2.8985	0.1178	285	2.8373	0.1314	232
-15	4.5283	3.7835	167	-0.9265	4.7733	59	3.9188	2.5583	287	-0.2547	2.5372	232	1.7629	0.1258	167	2.1221	0.2008	59	2.918	0.1173	287	2.8503	0.132	232
-14	4.2394	3.8087	166	-2.6418	5.0689	59	3.952	2.5744	284	-0.4898	2.5408	232	1.7588	0.126	166	2.1972	0.2018	59	2.9189	0.1179	284	2.856	0.1311	232
-13	3.5582	3.8527	163	-2.9112	4.9339	61	3.7367	2.5963	281	-1.4743	2.5823	229	1.7586	0.1275	163	2.2069	0.1953	61	2.9421	0.1183	281	2.8445	0.1324	229
-12	3.6151	3.8708	162	-5.1956	4.6121	59	4.1868	2.578	283	-1.4433	2.6034	228	1.7675	0.1275	162	2.2753	0.1968	59	2.8986	0.1162	283	2.8547	0.1344	228
-11	2.8209	3.8089	163	-4.6971	4.6123	60	4.1831	2.6029	279	-2.9248	2.5373	228	1.7985	0.1293	163	2.318	0.1938	60	2.8885	0.1176	279	2.8859	0.1337	228
-10	3.2702	3.7825	163	-4.6971	4.6123	60	3.8038	2.6017	280	-3.4212	2.5079	230	1.8017	0.1303	163	2.318	0.1938	60	2.9043	0.118	280	2.8578	0.1342	230
-9	2.0202	3.69	167	-4.9187	4.5628	60	4.0026	2.5953	281	-4.5707	2.526	232	1.7806	0.1282	167	2.2929	0.1901	60	2.9163	0.1174	281	2.8672	0.1354	232
-8	1.6748	3.6697	168	-4.9961	4.517	61	3.0281	2.6177	281	-4.8331	2.5091	234	1.777	0.1272	168	2.2883	0.1856	61	2.8935	0.1177	281	2.9062	0.1348	234
-7	2.3118	3.617	168	-4.9583	4.4435	62	2.7922	2.6218	280	-5.4639	2.534	227	1.7482	0.1263	168	2.3159	0.1831	62	2.9103	0.1186	280	2.8917	0.1379	227
-6	1.6707	3.6134	170	-6.0178	4.4878	61	3.0418	2.5986	283	-5.4202	2.5304	227	1.7373	0.1253	170	2.2998	0.183	61	2.941	0.1183	283	2.8921	0.1378	227
-5	2.1531	3.6561	167	-6.2642	4.5563	60	1.7312	2.6052	285	-4.6852	2.5423	224	1.6976	0.125	167	2.3203	0.1849	60	2.9528	0.1175	285	2.9168	0.1415	224
-4	2.094	3.6563	166	-5.8676	4.4985	61	1.8881	2.5941	287	-4.5953	2.5611	222	1.7502	0.1312	166	2.3441	0.1834	61	2.9631	0.1155	287	2.9215	0.1424	222
-3	0.8741	3.6103	165	-6.4522	4.4638	62	1.4148	2.6105	282	-3.9837	2.5199	227	1.7099	0.1323	165	2.3182	0.1822	62	2.939	0.1176	282	2.932	0.1397	227
-2	0.0285	3.6423	162	-5.5959	4.3898	63	1.2578	2.6238	283	-3.9487	2.4937	230	1.7222	0.1343	162	2.2495	0.1841	63	2.9593	0.1185	283	2.9376	0.1391	230
-1	-0.0346	3.6331	161	-6.5273	4.5369	65	-0.1764	2.6144	287	-4.7623	2.4328	236	1.7496	0.1361	161	2.2892	0.1847	65	2.9857	0.1181	287	2.9787	0.1378	236
0	-0.0005	3.7001	161	-6.5273	4.5369	65	-0.3066	2.5973	290	-4.8136	2.4068	238	1.7639	0.138	161	2.2892	0.1847	65	2.9899	0.117	290	2.9807	0.1362	238
1	0.7818	3.793	160	-6.6601	4.4696	66	-0.4029	2.5718	291	-5.3814	2.4726	239	1.7688	0.1383	160	2.3396	0.1888	66	2.979	0.1173	291	2.9702	0.1355	239
2	1.642	3.6443	159	-6.8554	4.5346	65	0.2199	2.5924	295	-5.8032	2.5369	234	1.7515	0.1379	159	2.3288	0.1914	65	2.9774	0.1155	295	2.9357	0.1365	234
3	1.108	3.6297	161	-7.2701	4.67	63	0.1515	2.5849	293	-5.0369	2.5134	233	1.7354	0.1368	161	2.3153	0.1972	63	2.9701	0.1155	293	2.9499	0.1358	233
4	1.1144	3.6525	160	-7.3904	4.6639	63	-0.317	2.5805	295	-5.181	2.5468	227	1.7447	0.1373	160	2.2947	0.1967	63	2.9575	0.1154	295	2.9415	0.1372	227
5	1.0506	3.7006	157	-8.4648	4.7332	60	-0.7039	2.6128	291	-5.6268	2.4944	228	1.7818	0.1393	157	2.3125	0.2044	60	2.972	0.118	291	2.9162	0.1364	228
6	0.8793	3.7599	154	-7.8386	4.7459	60	-0.9827	2.623	294	-5.5714	2.4754	230	1.7935	0.1411	154	2.3159	0.2049	60	2.9567	0.1171	294	2.9523	0.1365	230
7	1.3184	3.7725	154	-7.6177	4.7384	60	-1.9273	2.6547	295	-5.2779	2.4691	233	1.8107	0.1412	154	2.2941	0.2041	60	2.949	0.1172	295	2.931	0.1345	233
8	0.9707	3.7914	156	-6.659	4.6396	62	-2.3473	2.6816	298	-5.7445	2.4348	237	1.8194	0.1398	156	2.2822	0.1977	62	2.9257	0.1165	298	2.9233	0.133	237
9	0.5744	3.7396	158	-6.7369	4.4934	64	-1.7107	2.6312	302	-5.2466	2.499	241	1.8064	0.1384	158	2.3031	0.1988	64	2.9292	0.1161	302	2.9234	0.1326	241
10	0.347	3.6877	158	-6.5407	4.3126	67	-1.9464	2.6302	302	-5.9592	2.5007	240	1.802	0.1383	158	2.2768	0.1925	67	2.9046	0.1157	302	2.9269	0.1331	240
11	-0.6324	3.7415	155	-7.2232	4.3443	66	-3.1877	2.5904	299	-6.9125	2.4659	242	1.8136	0.1388	155	2.2447	0.1912	66	2.9137	0.1145	299	2.9327	0.1312	242
12	-0.0527	3.7017	155	-7.0241	4.3972	65	-3.755	2.5604	303	-6.3251	2.4556	241	1.7952	0.1394	155	2.1913	0.1949	65	2.9173	0.1128	303	2.9462	0.1321	241
13	-0.0248	3.6487	158	-7.0626	4.4663	64	-3.9149	2.5714	303	-6.3682	2.4944	241	1.7881	0.1375	158	2.222	0.1955	64	2.9428	0.1141	303	2.9486	0.1318	241
14	-0.3078	3.6142	160	-7.3382	4.4057	65	-4.4158	2.5943	305	-7.3728	2.4835	246	1.7676	0.1365	160	2.2242	0.1925	65	2.9096	0.1121	305	2.9839	0.1325	246
15	-1.1623	3.5726	164	-7.8007	4.4457	64	-5.0945	2.5759	309	-7.4363	2.4994	243	1.758	0.1338	164	2.1841	0.1978	64	2.9221	0.1108	309	3.0159	0.133	243
16	-1.1923	3.6246	165	-8.1594	4.4798	66	-5.3471	2.5086	310	-7.3647	2.4131	244	1.7814	0.1336	165	2.2654	0.2001	66	2.9489	0.1099	310	3.0403	0.1329	244
17	-2.5907	3.6201	164	-7.886	4.4717	66	-5.1899	2.4882	313	-7.0593	2.3965	248	1.7666	0.1334	164	2.2415	0.1999	66	2.9553	0.109	313	3.0539	0.1308	248
18	-1.9699	3.5841	166	-8.1627	4.4904	66	-5.6394	2.4645	318	-6.8919	2.3542	249	1.7445	0.1315	166	2.2287	0.2002	66	2.9348	0.108	318	3.0245	0.1272	249
19	-2.0349	3.5845	166	-8.2025	4.4882	66	-5.5613	2.4463	318	-7.2938	2.3274	254	1.7529	0.1313	166	2.1749	0.197	66	2.9207	0.1077	318	3.0217	0.1283	254
20	-1.6915	3.6025	172	-8.0268	4.4242	67	-5.2893	2.3932	326	-7.7299	2.3041	258	1.7409	0.126	172	2.1887	0.1945	67	2.895	0.1058	326	3.0401	0.1275	258
21	0.9992	3.6687	169	-7.4332	4.4511	66	-4.5352	2.3604	332	-8.136	2.2913	261	1.7248	0.1256	169	2.1901	0.1974	66	2.8911	0.1054	332	3.0599	0.1274	261
22	0.3905	3.6414	170	-7.9814	4.401	67	-5.2795	2.3612	332	-8.4524	2.2851	262	1.7428	0.1253	170	2.1315	0.1956	67	2.9003	0.1053	332	3.0539	0.1265	262
23	-0.2771	3.6193	171	-8.3705	4.5275	65	-6.1903	2.341	341	-8.1208	2.2735	259	1.7358	0.1247	171	2.1972	0.196	65	2.8871	0.1033	341	3.0355	0.1268	259
24	-0.5626	3.6592	168	-5.8201	3.6568	65	-6.6963	2.3356	342	-8.0712	2.2703	259	1.7289	0.1266	168	2.1705	0.1991	65	2.9045	0.1039	342	3.0234	0.1269	259
25	-1.0843	3.666	166	-6.8852	3.5959	67	-6.9828	2.3057	348	-8.8195	2.256	263	1.7502	0.127	166	2.1644	0.1927	67	2.917	0.1024	348	3.0418	0.1263	263
26	-1.8533	3.6145	167	-7.3072	3.5677	68	-7.1006	2.2999	349	-8.8324	2.2519	265	1.7139	0.1255	167	2.1849	0.191	68	2.8918	0.1023	349	3.0515	0.1257	265
27	-1.9826	3.6556	165	-7.6998	3.5781	68	-8.349	2.3639	355	-8.7479	2.2355	271	1.7081	0.1266	165	2.2422	0.1963	68	2.9102	0.1006	355	3.0402	0.1236	271
28	-3.4435	3.6639	166	-8.022	3.6773	66	-8.3094	2.347	361	-9.0079	2.2647	270	1.6995	0.1258	166	2.2446	0.1979	66	2.8984	0.0996	361	3.08	0.1234	270
29	-4.589	3.666	161	-9.4173	3.9844	68	-8.413	2.3465	363	-9.0758	2.2695	269	1.7171	0.1279	161	2.2359	0.1933	68	2.8814	0.0975	363	3.0458	0.1234	269
30	-5.5971	3.6677	158	-10.6035	3.9601	70	-8.8852	2.3116	371	-9.0227	2.2773	266	1.6863	0.1235	158	2.251	0.1881	70	2.8649	0.096	371	3.0649	0.1239	266
31	-5.8819	3.6998	156	-10.1052	3.9356	71	-9.4727	2.317	370	-9.7907	2.1709	267	1.7206	0.1254	156	2.2361	0.186	71	2.8631	0.0962	370	3.0739	0.124	267
32	-4.8664	3.6804	159	-9.4729	3.8572	73	-9.6676	2.3134	373	-9.3926	2.2352	270	1.7159	0.1243	159	2.2477	0.1812	73	2.8847	0.0954	373	3.0597	0.1215	270
33	-5.2589	3.6104	159	-8.7791	3.796	75	-11.1318	2.2926	387	-9.5341	2.2078	279	1.7327	0.1226	159	2.2381	0.1764	75	2.8528	0.0917	387	3.059	0.1206	279
34	-5.2205	3.601	164	-9.5537	3.8376	75	-10.8827	2.2524	388	-9.5164	2.2676	281	1.7518	0.1223	164	2.2796	0.1742	75	2.8815	0.0923	388	3.0523	0.1193	281
35	-5.2396	3.6707	163	-9.4528	3.7391	77	-11.8134	2.1544	392	-9.4025	2.2984	287	1.7939	0.1244	163	2.229	0.1733	77	2.9033	0.0909	392	3.0367	0.1166	287
36	-5.3719	3.6059	167	-10.0795	3.84	76	-12.3465	2.1787	386	-9.94	2.3109	288	1.7835	0.1193	167	2.258	0.1731	76	2.898	0.0923	386	3.0565	0.1158	288
37	-4.8781	3.5889	166	-10.6701	3.7927	77	-12.9276	2.1327	392	-10.6495	2.2786	297	1.7654	0.1192	166	2.274	0.1697	77	2.8894	0.0915	392	3.079	0.1147	297
38	-4.2589	3.5892	167	-11.634	3.7316	77	-13.1893	2.1015	399	-11.4037	2.2995	302	1.7461	0.1172	167	2.2268	0.1619	77	2.9036	0.0902	399	3.0982	0.1128	302
39	-4.421	3.5822	167	-11.0274	3.7616	77	-13.2108	2.1082	396	-12.1757	2.2908	311	1.7062	0.1145	167	2.2718	0.1645	77	2.8738	0.089	396	3.1189	0.1111	311
40	-4.6358	3.5392	170	-10.7373	3.6525	77	-13.8494	2.0911	400	-12.4571	2.2694	315	1.6908	0.1129	170	2.2464	0.1631	77	2.8665	0.0886	400	3.1174	0.1102	315
41	-4.6358	3.5392	170	-10.7629	3.7008	76	-14.2984	2.0855	406	-12.5387	2.2559	316	1.6908	0.1129	170	2.2445	0.1652	76	2.8719	0.0885	406	3.11	0.1095	316
42	-4.4858	3.5208	172	-10.4617	3.7029	76	-14.7718	2.0584	411	-13.0814	2.2566	318	1.6831	0.112	172	2.222	0.166	76	2.8721	0.0877	411	3.1172	0.1087	318
43	-4.1565	3.4684	173	-11.3294	3.7561	77	-15.405	2.0572	406	-13.6355	2.2392	325	1.6648	0.1117	173	2.2322	0.1641	77	2.8993	0.0879	406	3.1169	0.1076	325
44	-4.9302	3.4452	177	-11.3863	3.708	78	-16.18	2.0452	415	-14.223	2.2105	328	1.6812	0.1107	177	2.2548	0.1636	78	2.8928	0.0864	415	3.1078	0.1079	328
45	-4.1736	3.4332	175	-11.6102	3.6676	79	-16.5485	2.0462	424	-14.7648	2.2173	329	1.6928	0.1123	175	2.2378	0.1624	79	2.8499	0.0873	424	3.0916	0.1074	329
46	-3.5594	3.436	173	-11.0096	3.5252	79	-16.6834	2.0449	427	-15.5801	2.1915	332	1.668	0.1134	173	2.1967	0.1601	79	2.8494	0.0871	427	3.0878	0.1069	332
47	-5.1627	3.295	176	-11.5385	3.5571	79	-17.4102	2.0433	433	-14.8939	2.1758	334	1.6748	0.1133	176	2.2073	0.1617	79	2.8639	0.0862	433	3.0724	0.1071	334
48	-5.2775	3.2901	176	-11.3686	3.5666	79	-18.4177	2.047	432	-15.3501	2.156	337	1.6716	0.1144	176	2.1873	0.1632	79	2.895	0.087	432	3.0713	0.1059	337
49	-5.3759	3.2876	176	-13.1496	3.5393	79	-18.8524	2.0331	436	-15.3247	2.156	339	1.6107	0.1123	176	2.1777	0.1614	79	2.8809	0.0862	436	3.0518	0.1055	339
50	-4.7025	3.3864	176	-12.9573	3.4489	82	-19.7686	2.0338	444	-15.1706	2.1803	341	1.6013	0.1114	176	2.1822	0.1579	82	2.9067	0.0854	444	3.0603	0.1048	341
51	-4.8343	3.4635	177	-14.3003	3.4125	82	-20.6473	2.0278	448	-15.1341	2.1901	337	1.6243	0.1103	177	2.1575	0.1578	82	2.9134	0.0855	448	3.0497	0.1045	337
52	-4.7626	3.4914	176	-13.8824	3.4339	81	-20.5971	2.0081	452	-15.2266	2.1826	336	1.6376	0.1111	176	2.1202	0.1597	81	2.9182	0.0849	452	3.0287	0.1048	336
53	-5.5621	3.4693	179	-14.5413	3.4353	81	-20.928	2.0089	452	-15.9539	2.1842	342	1.651	0.1097	179	2.1029	0.1594	81	2.9041	0.0841	452	3.051	0.1032	342
54	-5.4072	3.4987	176	-14.5402	3.4098	82	-21.4273	2.0289	451	-16.4451	2.1862	346	1.6837	0.1116	176	2.0965	0.1577	82	2.8795	0.0834	451	3.0814	0.1031	346
55	-5.3459	3.4794	177	-14.5402	3.4098	82	-21.4928	2.026	451	-17.2266	2.1613	350	1.6827	0.111	177	2.0965	0.1577	82	2.8847	0.0835	451	3.0548	0.1007	350
56	-6.6546	3.478	181	-14.941	3.4282	81	-22.0109	2.0159	453	-17.5774	2.1564	353	1.6287	0.1044	181	2.0758	0.1583	81	2.8511	0.0829	453	3.0524	0.1	353
57	-6.6754	3.4552	184	-14.6014	3.4543	80	-22.1694	2.0105	461	-19.0991	2.1774	351	1.6442	0.1025	184	2.0925	0.1594	80	2.8525	0.0816	461	3.0677	0.1002	351
58	-6.8212	3.4401	185	-16.4051	3.4686	82	-22.8557	1.9638	471	-19.4587	2.2054	349	1.6337	0.1027	185	2.1237	0.1561	82	2.841	0.0803	471	3.1143	0.1009	349
59	-7.0607	3.4816	182	-16.3559	3.2975	82	-22.829	1.9614	472	-19.5878	2.2227	348	1.613	0.1029	182	2.0595	0.1529	82	2.8221	0.0794	472	3.0819	0.1002	348
60	-7.7485	3.451	180	-16.7465	3.195	88	-22.7881	1.9508	476	-20.0188	2.2267	350	1.5723	0.0995	180	2.1228	0.1461	88	2.8278	0.0791	476	3.0931	0.1	350
61	-7.976	3.4502	182	-17.1953	3.0895	92	-23.0241	1.9232	485	-19.8458	2.2024	352	1.574	0.0998	182	2.1094	0.1389	92	2.8256	0.0782	485	3.0782	0.0997	352
62	-7.8887	3.435	183	-16.7393	3.0899	93	-23.8645	1.8661	492	-19.8663	2.2179	353	1.5678	0.0994	183	2.11	0.1374	93	2.8377	0.0782	492	3.0915	0.0999	353
63	-7.4747	3.4154	183	-16.7393	3.0899	93	-23.3742	1.883	499	-20.3555	2.2046	355	1.5844	0.0995	183	2.11	0.1374	93	2.8245	0.0772	499	3.0796	0.0998	355
64	-8.5094	3.3267	193	-15.8554	3.1986	94	-23.2327	1.9641	497	-20.8148	2.2217	357	1.5939	0.0956	193	2.1319	0.1367	94	2.8382	0.0774	497	3.0831	0.0997	357
65	-8.4289	3.3042	195	-15.9421	3.1659	95	-23.4908	1.9525	503	-20.9061	2.2229	358	1.6092	0.0987	195	2.1576	0.1377	95	2.8209	0.0762	503	3.0663	0.0993	358
66	-8.4716	3.1805	206	-15.9445	3.1128	97	-23.3412	1.9484	508	-21.4332	2.2116	360	1.5891	0.0946	206	2.1156	0.1342	97	2.826	0.0757	508	3.0533	0.0982	360
67	-8.345	3.1941	204	-16.1285	3.115	97	-23.7681	1.9471	505	-21.6898	2.3037	364	1.583	0.095	204	2.1143	0.1342	97	2.8153	0.0761	505	3.0489	0.0965	364
68	-8.9993	3.1522	204	-15.193	3.2375	98	-23.876	1.9501	508	-22.0669	2.3041	365	1.5648	0.0948	204	2.0907	0.1342	98	2.8224	0.0757	508	3.0365	0.0961	365
69	-9.8745	3.1543	205	-17.2745	3.5452	97	-24.2728	1.9365	510	-23.0656	2.2592	364	1.5691	0.0947	205	2.1001	0.1336	97	2.7898	0.0753	510	3.0421	0.0955	364
70	-9.9577	3.1442	205	-17.2908	3.6219	95	-25.0347	1.9446	514	-23.5167	2.2595	368	1.5792	0.0945	205	2.099	0.136	95	2.8093	0.0749	514	3.0549	0.0941	368
71	-8.9175	3.2428	206	-17.5183	3.5915	96	-25.1882	1.9564	512	-23.6677	2.2836	367	1.5746	0.0939	206	2.0708	0.1341	96	2.801	0.0748	512	3.0511	0.0942	367
72	-9.7385	3.2983	208	-17.9454	3.5847	96	-25.4844	1.9705	507	-24.1524	2.2743	371	1.5793	0.095	208	2.0759	0.1333	96	2.7978	0.0751	507	3.0525	0.0941	371
73	-9.5957	3.3143	207	-17.6701	3.5171	98	-25.5849	1.9667	509	-24.1451	2.2362	373	1.5703	0.0952	207	2.0572	0.1313	98	2.7759	0.0739	509	3.0518	0.0945	373
74	-8.7653	3.3712	208	-17.4324	3.52	98	-25.7721	1.9439	511	-23.4194	2.248	371	1.5966	0.095	208	2.0371	0.1323	98	2.7821	0.0739	511	3.0073	0.0935	371
75	-8.2697	3.3667	207	-17.538	3.512	98	-26.0147	1.9435	513	-23.4184	2.2282	375	1.5746	0.0959	207	2.057	0.1306	98	2.7668	0.0734	513	3.0113	0.0935	375
76	-8.4013	3.3209	207	-17.4942	3.4904	96	-26.4882	1.9764	518	-23.1319	2.2292	374	1.5856	0.0976	207	1.9985	0.1265	96	2.7571	0.0726	518	2.9931	0.0931	374
77	-8.8697	3.3234	209	-18.3357	3.5664	98	-27.6418	1.9804	521	-24.0494	2.24	374	1.5834	0.0967	209	2.0168	0.1251	98	2.7416	0.0725	521	2.9801	0.0936	374
78	-9.2147	3.3407	207	-18.6883	3.5379	101	-27.7547	1.9914	519	-23.9807	2.2044	382	1.5899	0.0975	207	2.0105	0.1293	101	2.7515	0.0726	519	2.9743	0.0926	382
79	-9.155	3.3353	211	-19.5422	3.4642	105	-27.2045	1.9837	526	-24.0005	2.2152	383	1.5821	0.096	211	2.0641	0.1287	105	2.7744	0.0723	526	2.9754	0.0894	383
80	-9.7113	3.3159	208	-19.3739	3.4353	106	-28.1328	1.9884	530	-23.9779	2.2001	386	1.5642	0.0977	208	2.0267	0.1286	106	2.7901	0.0722	530	2.9522	0.0885	386
81	-10.398	3.2257	208	-19.4448	3.4038	107	-28.3187	1.9793	528	-25.0046	2.2399	390	1.596	0.1004	208	2.029	0.1274	107	2.787	0.0717	528	2.9736	0.0884	390
82	-9.9724	3.3142	206	-19.9925	3.4477	106	-28.2671	1.9787	540	-24.9795	2.2503	390	1.5923	0.1007	206	2.0343	0.1265	106	2.7687	0.0707	540	2.9795	0.0887	390
83	-10.4452	3.2721	210	-21.6578	3.5091	109	-28.2316	1.9745	547	-25.2297	2.2261	397	1.5839	0.0993	210	2.0292	0.1239	109	2.7934	0.0707	547	2.9687	0.0879	397
84	-10.3876	3.2571	211	-20.544	3.4761	112	-27.7611	1.9458	559	-25.6829	2.2073	403	1.5757	0.0992	211	2.0081	0.1211	112	2.78	0.0694	559	3.0009	0.0878	403
85	-10.6163	3.2034	215	-21.2972	3.5431	109	-28.3099	1.9624	558	-26.0255	2.2318	404	1.5759	0.0976	215	2.0423	0.1229	109	2.7774	0.0695	558	3.0228	0.0873	404
86	-10.6339	3.2314	213	-20.9769	3.5457	109	-28.7574	1.9738	566	-25.8544	2.2216	408	1.5827	0.0984	213	2.0244	0.1221	109	2.7652	0.069	566	3.021	0.0865	408
87	-10.5112	3.1532	219	-21.0788	3.5473	110	-28.3114	1.9522	565	-25.9064	2.2701	404	1.5718	0.096	219	1.9964	0.1189	110	2.7525	0.0693	565	3.0305	0.087	404
88	-9.7197	3.1485	217	-19.7543	3.6703	112	-28.9634	1.9621	565	-25.8142	2.2527	408	1.572	0.0968	217	1.9701	0.1183	112	2.7782	0.0692	565	3.0042	0.0869	408
89	-10.8071	3.1114	224	-19.7732	3.5642	112	-28.9658	1.9828	567	-26.2455	2.2845	413	1.5596	0.0946	224	1.9808	0.118	112	2.7672	0.0691	567	3.0012	0.0861	413
90	-10.9638	3.1096	228	-18.5647	3.6302	111	-28.8735	1.9976	562	-26.2486	2.3292	418	1.5443	0.0935	228	1.9532	0.1193	111	2.7747	0.0694	562	2.999	0.0853	418
91	-10.3275	3.1231	229	-18.4281	3.597	112	-28.7626	1.9928	572	-26.9025	2.3321	418	1.5354	0.0924	229	1.9338	0.1197	112	2.7663	0.0687	572	2.9995	0.0849	418
92	-10.7853	3.1252	228	-20.6364	3.5806	115	-28.9877	1.9814	583	-28.3358	2.2981	420	1.4954	0.0911	228	1.9486	0.121	115	2.7476	0.0677	583	3.0043	0.0844	420
93	-11.0006	3.1397	228	-20.9141	3.5557	115	-28.6567	1.9917	580	-29.1506	2.3139	421	1.4962	0.0911	228	1.9196	0.1229	115	2.7379	0.0678	580	2.9838	0.0838	421
94	-11.0954	3.1509	224	-21.4092	3.51	118	-28.708	1.9984	581	-29.2144	2.2967	425	1.4936	0.0915	224	1.9202	0.1248	118	2.7195	0.0672	581	2.9948	0.0839	425
95	-11.7401	3.1718	225	-22.0978	3.4768	120	-28.6628	2.0414	579	-29.1348	2.2901	421	1.4652	0.0902	225	1.956	0.1239	120	2.6984	0.0674	579	2.9817	0.085	421
96	-11.9974	3.2065	222	-22.0469	3.4551	121	-28.6909	2.0136	592	-28.5076	2.307	421	1.4404	0.0903	222	1.9676	0.1244	121	2.687	0.0662	592	2.9756	0.0849	421
97	-11.4739	3.2157	225	-21.0295	3.4757	122	-28.4122	2.028	591	-27.999	2.3335	416	1.4352	0.0898	225	1.9612	0.1251	122	2.6906	0.0662	591	2.9525	0.0843	416
98	-12.5311	3.2185	225	-20.8299	3.3994	126	-28.5566	2.0347	588	-28.2658	2.3361	415	1.4386	0.0885	225	1.9208	0.1225	126	2.6789	0.0666	588	2.9587	0.0841	415
99	-12.5084	3.2168	225	-22.3034	3.3571	128	-28.5793	2.036	589	-28.5593	2.3441	412	1.4541	0.0892	225	1.8824	0.1202	128	2.6826	0.0664	589	2.9363	0.084	412
100	-12.0549	3.2035	226	-20.8779	3.4924	131	-28.8373	2.0359	590	-29.1725	2.3509	416	1.4523	0.089	226	1.8657	0.1177	131	2.678	0.0662	590	2.9682	0.0838	416
101	-12.5748	3.1922	229	-20.5159	3.4156	135	-28.7005	2.0431	592	-29.3571	2.3968	422	1.4683	0.0888	229	1.8614	0.1157	135	2.6759	0.0656	592	2.9831	0.0835	422
102	-11.6337	3.2041	230	-20.6926	3.3904	136	-28.5868	2.0471	591	-29.6012	2.424	422	1.474	0.0881	230	1.8636	0.1153	136	2.6709	0.0657	591	2.9681	0.084	422
103	-11.88	3.2406	228	-19.8439	3.3251	138	-28.0327	2.0638	597	-29.9067	2.4453	419	1.4801	0.0887	228	1.8423	0.114	138	2.6637	0.0653	597	2.9445	0.0837	419
104	-11.9853	3.2957	226	-19.7269	3.3283	138	-27.2896	2.0697	597	-30.7027	2.4394	424	1.4889	0.0887	226	1.8136	0.1137	138	2.6574	0.0654	597	2.9422	0.0832	424
105	-12.73	3.33	230	-19.8878	3.2863	141	-27.7091	2.0954	595	-30.1375	2.4209	429	1.5089	0.0905	230	1.8077	0.112	141	2.6815	0.0641	595	2.9118	0.0833	429
106	-13.0282	3.3043	233	-20.0091	3.3033	143	-27.4772	2.0774	605	-30.3391	2.4505	424	1.5253	0.0897	233	1.8086	0.1105	143	2.6563	0.0634	605	2.9054	0.0842	424
107	-12.625	3.3017	232	-19.7659	3.2757	144	-26.8214	2.0769	610	-30.7869	2.4487	426	1.5028	0.0891	232	1.7764	0.1093	144	2.6478	0.0631	610	2.9344	0.0839	426
108	-13.1876	3.32	236	-20.3396	3.2874	145	-26.751	2.0752	610	-30.8105	2.472	429	1.5036	0.0876	236	1.7713	0.1088	145	2.6268	0.0625	610	2.9344	0.0841	429
109	-12.2762	3.3024	241	-20.4492	3.2837	147	-27.0569	2.0843	612	-31.0678	2.4917	425	1.4785	0.0858	241	1.7577	0.108	147	2.6166	0.0641	612	2.9591	0.0855	425
110	-13.4063	3.2428	244	-20.0897	3.2664	148	-26.0942	2.0968	609	-31.8403	2.4627	428	1.4718	0.0866	244	1.7375	0.1063	148	2.592	0.0635	609	2.9652	0.0845	428
111	-12.9592	3.2555	243	-19.9265	3.2481	149	-26.1406	2.0869	618	-32.0086	2.461	432	1.4782	0.0871	243	1.7218	0.1065	149	2.5635	0.0628	618	2.9389	0.0843	432
112	-12.5309	3.2338	246	-20.1781	3.2071	152	-26.5221	2.1007	628	-32.129	2.4817	434	1.4989	0.0883	246	1.7035	0.1054	152	2.537	0.0625	628	2.9485	0.0842	434
113	-11.8846	3.3334	244	-20.4291	3.2226	152	-26.6689	2.1127	629	-31.6528	2.4835	432	1.5022	0.0889	244	1.6871	0.1054	152	2.5438	0.0627	629	2.9274	0.0844	432
114	-12.7603	3.279	251	-20.0499	3.2304	152	-26.6497	2.0953	631	-31.9035	2.5	435	1.5274	0.0905	251	1.6972	0.1054	152	2.5217	0.0628	631	2.9232	0.0845	435
115	-12.2271	3.2902	257	-19.5767	3.2793	158	-26.0094	2.1007	635	-31.7373	2.5427	435	1.5401	0.0895	257	1.6925	0.1036	158	2.4958	0.0624	635	2.9299	0.0848	435
116	-11.6911	3.291	254	-20.6396	3.3251	160	-25.8706	2.1108	633	-31.1585	2.564	437	1.5334	0.0899	254	1.7042	0.1027	160	2.5092	0.0629	633	2.9147	0.0847	437
117	-11.29	3.2562	259	-19.2336	3.4109	163	-25.5159	2.113	635	-30.3965	2.5862	444	1.546	0.0895	259	1.6907	0.1019	163	2.4784	0.0627	635	2.8819	0.0847	444
118	-11.2608	3.2344	261	-18.7095	3.4678	159	-25.7872	2.1406	636	-29.8924	2.5542	449	1.5616	0.0897	261	1.6853	0.1031	159	2.4534	0.0619	636	2.8433	0.0833	449
119	-11.1572	3.2183	267	-18.7879	3.481	158	-25.1419	2.182	637	-29.285	2.6314	447	1.5988	0.0912	267	1.6767	0.104	158	2.4461	0.0617	637	2.8371	0.0836	447
120	-11.4207	3.2306	273	-18.3686	3.5189	155	-24.7961	2.2167	640	-29.3898	2.6176	451	1.5899	0.0897	273	1.6207	0.1033	155	2.4302	0.0615	640	2.8073	0.0838	451
121	-12.61	3.1904	276	-18.0433	3.604	151	-24.7357	2.2366	635	-28.922	2.6142	454	1.5788	0.0887	276	1.5874	0.1031	151	2.4149	0.0614	635	2.7972	0.0838	454
122	-12.3278	3.1692	278	-18.4037	3.5754	152	-24.6756	2.2513	639	-29.1368	2.6038	457	1.5751	0.0882	278	1.5787	0.103	152	2.3842	0.0601	639	2.7933	0.0836	457
123	-10.4549	3.2419	283	-18.4037	3.5754	152	-24.9931	2.2511	642	-28.1902	2.6337	460	1.5625	0.0876	283	1.5787	0.103	152	2.3826	0.0597	642	2.78	0.0832	460
124	-9.8257	3.2953	275	-19.2613	3.5477	153	-25.3226	2.2081	647	-27.1998	2.6546	469	1.5477	0.0897	275	1.57	0.102	153	2.3672	0.0591	647	2.7693	0.0824	469
125	-10.2843	3.3282	282	-19.6038	3.5487	155	-25.1537	2.2241	650	-27.2202	2.6404	475	1.5442	0.0874	282	1.536	0.0995	155	2.3551	0.0588	650	2.7714	0.0821	475
126	-9.827	3.4176	276	-20.6541	3.6766	154	-26.051	2.2439	648	-27.084	2.6793	479	1.5518	0.0889	276	1.531	0.1006	154	2.3491	0.0588	648	2.7557	0.0814	479
127	-10.8734	3.4627	280	-20.9676	3.6738	155	-25.4132	2.2477	651	-27.747	2.6502	477	1.5411	0.088	280	1.5231	0.1001	155	2.3358	0.0583	651	2.7446	0.0819	477
128	-10.726	3.4481	282	-22.0823	3.6572	157	-25.5289	2.2685	652	-27.3516	2.6681	482	1.5429	0.0877	282	1.5427	0.1018	157	2.3301	0.0585	652	2.7437	0.0817	482
129	-9.9005	3.4212	285	-20.9595	3.5476	158	-25.375	2.2833	648	-26.9194	2.7079	484	1.5307	0.0869	285	1.5168	0.0993	158	2.3381	0.0589	648	2.7437	0.0819	484
130	-9.6334	3.4038	287	-21.7915	3.5297	159	-24.1767	2.2993	661	-25.8542	2.7031	494	1.5551	0.0918	287	1.506	0.0988	159	2.3138	0.058	661	2.7048	0.0809	494
131	-11.9927	3.3937	291	-21.7515	3.5485	158	-23.676	2.3145	667	-25.4775	2.6911	499	1.573	0.0922	291	1.5098	0.0995	158	2.3146	0.0581	667	2.7088	0.0806	499
132	-11.5231	3.3383	295	-21.9382	3.5207	160	-23.1731	2.311	676	-24.5831	2.7214	500	1.5729	0.0903	295	1.5101	0.0984	160	2.3043	0.0577	676	2.6808	0.0804	500
133	-10.975	3.3633	300	-21.7033	3.5054	161	-22.7242	2.3358	684	-24.7101	2.7312	498	1.5775	0.0897	300	1.504	0.0979	161	2.3025	0.0576	684	2.6675	0.0803	498
134	-11.5965	3.3361	307	-22.4958	3.4854	166	-22.7258	2.3256	691	-25.1134	2.7285	499	1.5657	0.0877	307	1.5104	0.0965	166	2.2878	0.0574	691	2.6627	0.0805	499
135	-11.1116	3.3027	311	-23.0343	3.4717	167	-22.4632	2.3301	702	-24.6382	2.7232	507	1.5754	0.0867	311	1.5129	0.096	167	2.2846	0.0568	702	2.6358	0.0791	507
136	-11.1141	3.296	316	-22.6614	3.417	170	-21.7713	2.3506	703	-24.4074	2.7397	510	1.5524	0.0848	316	1.4957	0.0949	170	2.2851	0.057	703	2.6217	0.0788	510
137	-10.4725	3.2848	315	-21.2735	3.353	173	-21.1862	2.3289	710	-23.8793	2.7521	516	1.5455	0.0852	315	1.4499	0.0935	173	2.2678	0.0565	710	2.6297	0.0781	516
138	-10.5934	3.2324	323	-21.1948	3.3558	176	-20.7258	2.341	709	-22.9345	2.795	517	1.5361	0.0836	323	1.4237	0.089	176	2.2556	0.0564	709	2.6087	0.0783	517
139	-10.511	3.2231	323	-21.5999	3.3817	177	-20.7099	2.3518	720	-23.0186	2.8026	516	1.5454	0.0841	323	1.3837	0.0855	177	2.2273	0.0555	720	2.6017	0.0785	516
140	-10.4241	3.2067	331	-21.6823	3.3518	179	-20.3227	2.3471	723	-22.9408	2.8387	519	1.5395	0.0832	331	1.3956	0.0853	179	2.1992	0.0547	723	2.6065	0.0779	519
141	-10.3954	3.1828	339	-20.8343	3.3375	182	-20.333	2.3449	731	-22.6454	2.8089	525	1.506	0.0804	339	1.378	0.0841	182	2.1894	0.0546	731	2.5794	0.0766	525
142	-9.2915	3.178	348	-20.302	3.3176	183	-19.81	2.3542	731	-22.3399	2.8109	527	1.5244	0.0808	348	1.3666	0.084	183	2.1727	0.0542	731	2.5639	0.0761	527
143	-8.7303	3.1886	347	-18.5382	3.3815	185	-19.0922	2.3673	730	-22.3369	2.8289	527	1.5186	0.0809	347	1.3704	0.0849	185	2.134	0.0534	730	2.5717	0.0765	527
144	-8.8503	3.1554	355	-18.7801	3.3767	185	-18.4435	2.4178	729	-21.3358	2.7795	536	1.5275	0.0821	355	1.3597	0.0854	185	2.1178	0.053	729	2.5277	0.0749	536
145	-8.5825	3.1759	357	-18.7178	3.3908	186	-17.6016	2.4318	736	-20.5805	2.7856	538	1.555	0.0845	357	1.3559	0.0856	186	2.1095	0.0525	736	2.5025	0.0745	538
146	-7.894	3.1207	369	-17.5952	3.3743	191	-16.9545	2.4223	734	-20.5699	2.808	544	1.5578	0.0832	369	1.3315	0.0844	191	2.1155	0.0526	734	2.4907	0.0738	544
147	-8.3424	3.111	374	-17.2337	3.366	191	-17.2138	2.4314	744	-20.1114	2.7759	553	1.5653	0.0829	374	1.3191	0.0835	191	2.1098	0.0522	744	2.4754	0.073	553
148	-8.6039	3.0658	382	-16.995	3.3832	192	-16.1509	2.4247	749	-19.7397	2.7928	551	1.5712	0.0815	382	1.3277	0.084	192	2.0837	0.0516	749	2.479	0.0729	551
149	-8.6207	3.0599	384	-16.3105	3.3385	194	-15.7228	2.4279	751	-18.939	2.746	558	1.5894	0.0825	384	1.3104	0.083	194	2.0798	0.0517	751	2.4756	0.0725	558
150	-8.7488	3.0423	387	-16.6676	3.2121	201	-15.8963	2.4223	756	-18.5282	2.7233	563	1.5972	0.0822	387	1.2902	0.0808	201	2.0748	0.0514	756	2.4691	0.072	563
151	-9.2537	3.0457	388	-16.4461	3.2601	200	-15.1702	2.4179	761	-17.9267	2.7312	566	1.6016	0.0825	388	1.3048	0.0812	200	2.0686	0.0514	761	2.4663	0.0722	566
152	-9.6532	3.0227	392	-14.4626	3.1941	206	-14.6332	2.4254	762	-16.5167	2.7876	567	1.6034	0.0818	392	1.243	0.0771	206	2.0547	0.0516	762	2.4713	0.0728	567
153	-9.6515	2.9579	402	-13.7152	3.2241	207	-13.8858	2.4395	764	-15.7313	2.7811	570	1.593	0.0803	402	1.2631	0.0768	207	2.0452	0.0513	764	2.4757	0.072	570
154	-9.8587	2.9516	408	-11.7397	3.2534	209	-14.2402	2.4569	768	-15.3276	2.7869	567	1.611	0.0801	408	1.2383	0.0741	209	2.0275	0.0512	768	2.4462	0.0716	567
155	-8.4834	2.938	412	-11.0876	3.2743	207	-13.7647	2.4376	775	-14.8987	2.7865	570	1.6028	0.0794	412	1.2153	0.073	207	2.0231	0.0508	775	2.4456	0.0711	570
156	-8.23	2.9011	417	-10.6597	3.2577	210	-12.5653	2.4558	774	-14.5548	2.7706	579	1.6036	0.0788	417	1.1874	0.0712	210	2.0096	0.0506	774	2.4348	0.0705	579
157	-8.362	2.8831	421	-10.8699	3.2498	210	-12.2394	2.4438	781	-14.9402	2.7898	581	1.6252	0.0785	421	1.1699	0.0702	210	1.9949	0.0499	781	2.4409	0.0706	581
158	-7.6579	2.8875	426	-10.6286	3.2997	206	-12.0878	2.4402	792	-13.7554	2.7991	582	1.6084	0.0777	426	1.1678	0.0714	206	1.9881	0.0493	792	2.4259	0.0706	582
159	-7.1478	2.8471	435	-9.9271	3.2745	207	-11.2818	2.4399	799	-12.9159	2.788	583	1.5828	0.0765	435	1.1657	0.0712	207	1.9814	0.0491	799	2.4059	0.0705	583
160	-7.3178	2.8343	438	-9.5854	3.2862	207	-10.0902	2.4477	802	-11.6038	2.7959	582	1.578	0.0761	438	1.1485	0.0716	207	1.9781	0.049	802	2.3665	0.0698	582
161	-6.7177	2.8032	442	-8.2824	3.3701	207	-9.3243	2.4624	804	-10.7164	2.773	586	1.553	0.0754	442	1.1351	0.0707	207	1.9743	0.0491	804	2.3525	0.0696	586
162	-6.7614	2.7955	445	-7.1652	3.3844	209	-8.9363	2.4686	810	-10.0058	2.7677	591	1.5432	0.0756	445	1.142	0.0709	209	1.9696	0.0487	810	2.3474	0.0688	591
163	-6.269	2.7881	452	-7.0998	3.3854	209	-8.666	2.4524	818	-9.0639	2.7517	596	1.5557	0.0748	452	1.1273	0.071	209	1.9584	0.0485	818	2.3425	0.0687	596
164	-6.2187	2.7907	450	-6.3351	3.3572	215	-8.3799	2.4572	824	-7.8184	2.7681	596	1.5481	0.0749	450	1.1256	0.0701	215	1.9496	0.0483	824	2.3518	0.0683	596
165	-5.755	2.749	452	-5.8584	3.3426	215	-7.7469	2.4341	828	-7.3971	2.8003	593	1.5188	0.0736	452	1.1237	0.07	215	1.9173	0.0479	828	2.3711	0.0686	593
166	-5.3936	2.7451	460	-5.2424	3.2916	216	-7.4344	2.4433	825	-6.5475	2.7831	602	1.5253	0.0731	460	1.1051	0.0699	216	1.9082	0.048	825	2.3773	0.068	602
167	-5.3226	2.7137	468	-5.3102	3.307	215	-7.1172	2.4628	825	-6.3743	2.7959	602	1.5239	0.072	468	1.1264	0.0724	215	1.9014	0.048	825	2.3675	0.0676	602
168	-4.9202	2.6935	467	-4.6519	3.2625	217	-6.1124	2.4752	829	-5.6273	2.8133	597	1.5134	0.0718	467	1.131	0.0718	217	1.8924	0.0477	829	2.3579	0.0674	597
169	-4.941	2.692	470	-3.9347	3.263	215	-4.9827	2.4504	838	-4.7491	2.8149	604	1.5296	0.0719	470	1.1242	0.0718	215	1.8858	0.0463	838	2.3399	0.0663	604
170	-4.1827	2.6943	471	-3.9255	3.2759	214	-4.4273	2.4435	849	-3.1483	2.8505	609	1.5426	0.0722	471	1.1151	0.0723	214	1.8791	0.046	849	2.3443	0.066	609
171	-3.6416	2.7063	469	-3.444	3.2567	215	-3.754	2.4626	840	-1.9221	2.8361	614	1.5415	0.0725	469	1.1103	0.0721	215	1.8734	0.0459	840	2.3525	0.0658	614
172	-3.707	2.7034	469	-2.8356	3.2552	215	-2.7724	2.4601	838	-1.2424	2.8186	618	1.522	0.0721	469	1.105	0.0719	215	1.8689	0.0458	838	2.3364	0.0653	618
173	-3.6084	2.6696	471	-2.07	3.2375	216	-1.9396	2.4426	843	-0.836	2.84	620	1.5222	0.0717	471	1.0984	0.0718	216	1.8478	0.0453	843	2.3401	0.0653	620
174	-3.044	2.6752	470	-2.1793	3.2403	216	-1.6332	2.4379	848	0.1042	2.8295	621	1.4991	0.0707	470	1.0877	0.0715	216	1.8471	0.0453	848	2.3145	0.0643	621
175	-3.3962	2.6583	471	-1.9941	3.2106	212	-1.6688	2.4372	849	1.1655	2.8224	622	1.4968	0.0705	471	1.0683	0.0711	212	1.8491	0.0454	849	2.316	0.0641	622
176	-3.3353	2.6316	478	-1.028	3.1349	212	-0.6909	2.4365	858	1.6611	2.8125	629	1.4975	0.0704	478	1.0514	0.0704	212	1.8424	0.0448	858	2.3214	0.0647	629
177	-3.8855	2.649	475	-1.1856	3.1144	213	0.2612	2.458	858	2.6473	2.8234	631	1.4956	0.0704	475	1.0615	0.0704	213	1.8542	0.0448	858	2.3425	0.0649	631
178	-3.5079	2.6449	477	-0.8911	3.1138	214	1.4818	2.4373	861	2.8166	2.8467	626	1.4941	0.0701	477	1.0665	0.0702	214	1.857	0.045	861	2.346	0.0651	626
179	-3.4802	2.6446	475	-0.6684	3.0793	217	1.745	2.4178	866	2.8838	2.8291	626	1.4819	0.0693	475	1.082	0.0695	217	1.8545	0.045	866	2.3419	0.0648	626
180	-2.8374	2.6299	474	-0.423	3.084	217	2.2771	2.4153	867	3.3863	2.8589	621	1.4838	0.0693	474	1.069	0.0697	217	1.8618	0.0449	867	2.3531	0.065	621
