# Supplementary material for: Neural circuit mechanisms for transforming learned olfactory valences into wind-oriented movement
Source: eLife. 2023 Sep 18;12:e85756. doi: 10.7554/eLife.85756 (PMC10588983; doi:10.7554/eLife.85756)
Supplement: Figure 6—source data 6. [file elife-85756-fig6-data6.xlsx]

## Sheet: Sheet1
	w;w,20xUAS-CsChrimson-mVenus; +/Empty-split-GA4	w;w,20xUAS-CsChrimson-mVenus; +/MB077B	w;w,20xUAS-CsChrimson-mVenus; +/SS33918	w;w,20xUAS-CsChrimson-mVenus; +/SS33917
#001	-6.2986	33.4625	-36.071	-71.9847
#002	86.1868	0.4672	81.86	100.347
#003	3.9815	-12.5957	-35.4083	-0.1556
#004	-0.355	-0.0119	115.795	0.0035
#005	-153.649	0.001	-9.2801	84.2377
#006	87.8629	84.2775	0.1132	103.34
#007	79.5602	-54.2464	103.198	-0.4202
#008	-5.582	-13.4042	33.0795	-110.058
#009	100.252	0.2271	90.7647	1.3728
#010	11.7169	-11.816	41.6433	83.7426
#011	1.0479	-7.4749	21.3116	55.8758
#012	-16.8022	-15.8248	-0.3726	-5.3031
#013	52.6707	10.0794	92.1696	79.2779
#014	-155.268	71.9196	-12.8768	96.772
#015	-35.5725	25.0408	50.6329	-62.8982
#016	32.1818	0.1111	-0.245	1.1208
#017	-0.4889	47.2929	-24.1446	47.8653
#018	-0.6417	33.606	1.0536	23.0359
#019	90.4006	0	59.6453	-0.5727
#020	63.4806	5.8337	-9.4873	1.4011
#021	-0.3163	-0.3024	-121.924	25.9808
#022	52.6171	0.2576	-6.1929	19.301
#023	-2.4788	50.744	0.6205	0.0462
#024	-78.3709	-33.1472	77.1569	0.2424
#025	-83.7942	-43.4736	38.1754	4.0329
#026	-1.6429	-5.4522	0.2068	-5.039
#027	45.8636	-0.1402	30.4884	83.9524
#028	-4.1744	96.3041	135.702	95.466
#029	65.7733	1.2258	-110.302	84.5173
#030	-1.6966	-0.1265	23.4321	76.1894
#031	5.3099	-4.582	-0.4288	1.3394
#032	16.651	59.5407	0.0936	31.0523
#033	26.9588	-0.0016	-19.4597	-3.3717
#034	51.1194	2.9236	-0.5732	2.7302
#035	-10.8827	11.1777	49.0263	14.6839
#036	-48.3065	28.6072	-0.0576	15.0809
#037	118.055	0.1963	25.0033	0.3325
#038	71.5187	49.2311	-19.0568	-23.9869
#039	42.9295	-80.4161	-154.177	0.376
#040	50.6229	66.1462	-0.5694	-36.1154
#041	-32.5809	-56.559	-6.26	32.2317
#042	68.4486	-32.8933	1.9625	-39.1016
#043	11.8879	-2.6423	95.9536	0
#044	-14.4087	-6.7273	105.923	10.8256
#045	18.1097	43.7801	79.482	3.2745
#046	1.8633	54.6243	-0.1664	-124.319
#047	-48.356	2.0786	-0.1965	0.0643
#048	-0.1812	-24.1311	74.6257	-47.2924
#049	-2.7114	0.622	58.3375	-1.8085
#050	13.204	-7.2919	73.9167	32.7788
#051	77.6648	-3.2768	118.017	0.0096
#052	0.3107	-3.684	-1.1431	40.2884
#053	0.684	58.4397	94.9889	-6.7331
#054	3.2374	-14.9979	-2.361	9.365
#055	-36.6759	18.3143	34.3854	-15.075
#056	-11.6412	49.6588	0.007	43.5467
#057	0.5011	105.389	52.4096	42.1203
#058	-14.8311	0.4155	104.191	17.3908
#059	16.6183	-12.0295	-14.0351	-0.6642
#060	-38.6762	43.6622	29.4295	29.4014
#061	4.8911	18.7991	17.237	1.1507
#062	50.6426	34.5766	17.7893	2.8188
#063	-29.9077	65.0805	120.913	3.6581
#064	25.9306	0.1069	3.484	120.84
#065	33.9208	-14.157	0.019	72.2392
#066	57.0277	13.24	8.9624	-4.3361
#067	46.2067	-0.4916	63.1482	67.7873
#068	-54.5862	-4.0126	-30.3771	-2.724
#069	23.9224	43.2733	-10.77	-10.2064
#070	115.37	0.003	8.5493	79.6346
#071	27.3232	-18.101	66.0798	-0.3516
#072	35.8819	6.2536	115.334	22.4206
#073	95.4993	54.0503	43.39	90.3723
#074	21.2322	-2.3555	134.228	63.9465
#075	2.7508	-24.0384	0.1847	-0.516
#076	-15.0109	0	-24.463	0.0893
#077	-125.374	1.1273	15.1506	-64.4465
#078	-1.0495	-21.796	1.7511	15.4418
#079	10.8645	-5.528	85.1982	-3.0567
#080	-45.7804	16.8	0.2641	10.7701
#081	50.7978	-29.2623	62.7874	34.2563
#082	30.1925	-37.8751	0.2367	88.9272
#083	108.041	21.3038	-32.835	17.2496
#084	43.6987	54.4803	138.752	36.8404
#085	32.7824	-25.6265	-0.5445	1.407
#086	7.1921	55.3291	69.7455	-11.6745
#087	78.5481	-0.3921	0.2309	72.2821
#088	-8.1337	-86.5596	10.4987	63.5933
#089	5.8026	-3.774	-21.6623	-16.5594
#090	-63.0888	0	-3.1441	105.275
#091	35.0379	32.8048	-106.102	-0.5986
#092	0.028	37.366	-2.3596	82.0219
#093	-0.831	0.7013	-49.1547	-140.337
#094	-9.8496	67.9341	27.5572	126.329
#095	110.661	48.7539	18.0897	-2.1457
#096	4.0461	2.1918	-6.5042	60.6518
#097	0.0414	-1.6536	75.0111	103.684
#098	81.4433	26.7141	-2.2392	45.7701
#099	-89.0134	-7.3961	0.3273	-29.8869
#100	2.7643	22.0721	115.937	7.6126
#101	-108.867	45.8691	-35.5027	1.9339
#102	-59.0429	12.4527	-0.3904	23.4189
#103	-42.9961	24.1802	0.0315	-53.7262
#104	-100.015	39.6445	1.9775	5.0858
#105	23.3256	0.3498	115.888	-0.1349
#106	-2.0346	46.942	0.0697	-0.1121
#107	-27.4995	-25.2132	-93.8005	-0.3926
#108	60.7212	-72.9927	-0.4025	75.0824
#109	2.4241	1.3045	8.7338	-16.9854
#110	94.7812	3.001	3.1403	-0.3748
#111	-99.7068	24.0923	0.3297	-4.1828
#112	95.0781	-3.5897	69.0306	47.259
#113	60.7827	28.4096	16.6771	-0.0016
#114	66.1476	-41.0047	21.2279	45.5761
#115	50.5937	-0.1834	50.2031	8.5614
#116	-10.5341	-78.6315	-0.2404	109.713
#117	136.347	-0.1235	45.5423	34.8446
#118	-0.6637	62.6056	-0.8668	7.7237
#119	55.0779	141.282	106.949	1.5545
#120	90.4261	-20.5139	-0.1257	-18.7013
#121	10.5023	1.4103	48.1605	89.1352
#122	41.918	32.7962	-0.2033	64.6094
#123	-2.5575	-24.0619	-3.8871	3.5778
#124	-12.6188	8.9609	0.2202	30.2991
#125	2.7285	-0.0486	102.83	0.0104
#126	30.9625	1.6768	-19.3107	96.4172
#127	65.4098	-3.3287	69.4913	87.0967
#128	-19.0416	72.5004	18.3248	0.0899
#129	-49.4402	84.5739	14.7884	-0.1
#130	49.7424	40.589	112.444	0
#131	-0.0403	-0.2849	-20.9291	124.958
#132	-0.0444	60.5254	-117.276	58.0348
#133	-30.2613	0.115	44.2435	72.7653
#134	-13.7742	82.5105	51.8362	85.4375
#135	-108.091	-0.2481	-4.9087	21.4095
#136	-113.299	-1.624	0.4152	60.928
#137	-49.6801	26.966	-87.0985	-35.9312
#138	0.0554	0.0205	19.8578	25.0561
#139	-0.293	52.6561	-23.1516	31.2769
#140	-76.7719	87.7918	92.0088	0.0928
#141	4.9272	46.0515	-4.6115	0.4205
#142	5.4238	107.654	54.3145	11.2684
#143	51.495	-39.5984	82.1537	59.248
#144	56.1013	-2.2218	106.674	71.6842
#145	-5.6379	0.6692	-0.6463	-25.79
#146	1.1363	66.8687	123.105	-33.0572
#147	-0.292	2.1264	51.6852	89.5723
#148	79.455	0.7335	-66.1312	-0.9126
#149	-29.1229	-106.919	-42.1443	29.6061
#150	47.1588	-52.0511	0.4185	-5.811
#151	0.9002	30.0852	32.6986	82.4585
#152	-1.7045	77.3354	60.5904	5.2345
#153	-14.4531	-0.9746	78.4875	-26.4949
#154	24.3758	-0.1759	42.9031	-0.1415
#155	-3.0543	-2.3251	89.4412	0.278
#156	-0.6385	41.326	0.6624	0.4777
#157	-4.3272	74.0898	11.9864	109.928
#158	-28.7809	54.4183	4.4512	2.477
#159	0.6875	19.8067	108.33	1.2651
#160	115.324	61.6135	108.532	90.3161
#161	-1.3857	9.3095	15.4606	-0.49
#162	96.504	67.1112	-0.0862	-1.0238
#163	47.2873	-0.8615	111.294	-0.954
#164	79.5953	-25.4957	38.2789	-0.0418
#165	15.6922	-26.4605	136.363	54.3749
#166	-56.6531	-5.3076	-1.8306	4.0167
#167	-0.203	1.8365	1.7051	-6.662
#168	-47.9795	68.5184	104.972	69.8912
#169	1.5549	23.789	53.9548	56.5377
#170	146.362	0.2835	-33.8455	48.911
#171	69.2715	-1.7196	-0.8458	48.3865
#172	57.9	56.8723	6.642	0.4174
#173	34.2174	40.5626	53.3214	50.4239
#174	60.9116	38.3522	0.4763	-0.5535
#175	15.41	-108.962	90.2784	-0.038
#176	-20.4066	-26.2179	36.83	30.2031
#177	-0.5052	-33.4083	22.0047	51.8216
#178	111.748	58.7862	-44.3279	0.2155
#179	12.6554	8.238	-111.436	53.9306
#180	-66.4439	0.3626	-1.3097	99.3033
#181	-43.0628	-1.196	9.5066	50.9496
#182	-55.8989	23.9372	0.0344	-0.1531
#183	99.7246	30.8815	0.4243	-0.3619
#184	0	-1.5225	20.2826	38.6694
#185	138.925	-4.2705	2.2467	58.8416
#186	-41.5854	-0.3836	-0.4496	55.2693
#187	-20.427	-7.2795	36.675	64.9877
#188	0.2832	-18.834	-7.1115	-0.9592
#189	-0.1691	21.8929	-16.5539	-16.6002
#190	-0.4252	113.173	51.2828	33.3471
#191	73.8634	44.0413	2.3548	48.4753
#192	-47.5909	6.7678	46.5887	36.0057
#193	3.0854	-2.3351	4.1146	-36.3465
#194	-59.6812	-1.6972	-63.7845	41.4376
#195	-42.1935	92.4045	51.1596	13.7193
#196	64.2901	-0.319	-40.9893	23.9108
#197	0.0812	53.2827	79.268	84.7866
#198	-11.5044	23.6823	-193.413	44.1935
#199	25.3121	96.5226	66.8558	59.6357
#200	15.8477	0.9311	-6.3173	22.8154
#201	29.5865	-2.7655	0.2271	-0.7685
#202	-65.029	-18.6206	0.1799	3.6805
#203	4.9652	-8.8641	20.1839	58.3764
#204	85.1686	60.736	27.3476	22.5667
#205	-88.7892	-3.8223	60.203	59.2903
#206	100.986	-3.0264	-3.3298	-16.8996
#207	-56.1177	77.4679	0.0796	34.3883
#208	-11.8258	8.2626	47.6935	0.1995
#209	36.6298	-26.5818	103.547	9.8567
#210	-1.9928	22.9312	18.0852	-2.0423
#211	-1.5279	69.9579	82.2759	1.279
#212	-71.2507	8.8064	28.5567	53.1743
#213	-11.2053	-23.1739	2.4027	8.5368
#214	-94.7316	7.813	35.038	62.2181
#215	7.7352	-115.081	21.568	96.7037
#216	86.9652	84.359	123.801	3.2266
#217	94.3074	-19.1108	11.4084	-0.2629
#218	50.9191	11.5419	25.7849	126.474
#219	-101.697	76.0057	-12.8405	0.9463
#220		0.7023	-0.046	54.8007
#221		93.8894	-1.4731	26.5585
#222		115.329	4.1132	-15.703
#223		-77.7553	4.0512	-29.3678
#224		18.6233	-1.5459	0.0064
#225		7.203	-0.1497	4.2024
#226		-108.133	-1.266	84.9623
#227		27.0379	-10.6004	74.8694
#228		46.3382	45.364	-33.9441
#229		-0.0644	62.1289	-1.3794
#230		-1.3132	-45.32	72.8752
#231		-1.3814	-51.6911	37.7788
#232		13.8396	-0.3067	51.2344
#233			47.5624	10.9989
#234			0.5238	35.9371
#235			68.8665	9.4511
#236			20.7434	52.2574
#237			74.7384	-6.2506
#238			0.6868	-39.0453
#239			-1.2747	56.3637
#240			12.357	-0.4474
#241			8.9325	-64.6668
#242			-26.3992	-7.5937
#243			2.8538	11.163
#244			73.0148	46.6569
#245			-13.9414	-22.1297
#246			0.0046	26.7737
#247			0.8224	66.4936
#248			11.1986	-32.3554
#249			65.8852	63.1641
#250			-0.2588	-4.6643
#251			-5.2856	34.9407
#252			68.0496	80.8479
#253			41.1541	96.692
#254			-16.5748	52.0293
#255			103.68	0
#256			62.0723	-3.1905
#257			50.4049	4.0836
#258			71.7927	-1.0978
#259			69.1884	0
#260			25.707	64.2675
#261			23.3031	43.4992
#262			-34.4118	83.0978
#263			-0.0054	120.55
#264			1.5183	57.0847
#265			0	-54.8985
#266			-5.9357	62.2157
#267			-2.22	25.5843
#268			4.8371	12.2589
#269			67.2302	40.2795
#270			75.4144	59.7118
#271			-52.9498	0.5771
#272			62.1543	0.1064
#273			-0.8025	91.2965
#274			-23.4688	-15.8473
#275			-1.6155	-18.5838
#276			-0.636	69.5504
#277			20.4013	9.9587
#278			79.4655	-1.5985
#279			18.7348	-0.196
#280			52.243	74.4334
#281			90.6991	-0.7448
#282			44.0061	70.641
#283			0.5138	32.2102
#284			-13.8316	10.3007
#285			41.311	1.7259
#286			63.1823	-30.1483
#287			73.9563	-0.0874
#288			11.252	67.0464
#289			60.1074	6.6472
#290			-15.8823	20.1362
#291			5.597	62.8557
#292			29.0156	-4.606
#293			64.9273	-0.1859
#294			37.4527	128.794
#295			0.785	0.3841
#296			75.4162	-0.0706
#297			0.6185	84.0486
#298			-0.8602	25.1843
#299			105.984	75.1582
#300			0.3936	-2.5065
#301			-0.7629	29.4374
#302			84.8686	41.9029
#303			72.8879	82.679
#304			25.3285	103.345
#305			-6.6613	52.4519
#306			82.9091	-12.4425
#307			-13.3805	-9.0404
#308			-11.1331	77.1744
#309			-6.4113	-23.4329
#310			59.5232	-0.6522
#311			99.3827	-31.3317
#312			0	32.8442
#313			66.2068	21.054
#314			53.8056	28.2156
#315			26.7883	46.2745
#316			150.628	-0.7142
#317			-37.0078	139.639
#318			-26.5726	64.7356
#319			-71.918	0
#320			13.7748	-41.7877
#321			-38.3072	-15.5955
#322			47.7356	0.0012
#323			-0.0103	70.5339
#324			61.9187	0.3948
#325			41.8513	52.9368
#326			-0.0272	17.8604
#327			47.3075	49.1617
#328			54.9625	44.3934
#329			77.806	-25.8484
#330			52.8311	16.5989
#331			0.9349	0.7421
#332			2.074	-49.9932
#333			86.7455	25.097
#334			2.6822	4.895
#335			84.5074	-2.2717
#336			0.7571	-0.0687
#337			-0.4152	113.226
#338			40.5505	67.8682
#339			75.2752	10.0474
#340			-23.5114	3.3739
#341			2.15	67.4148
#342			37.4576	0.0594
#343			33.2001	21.6267
#344			-0.0317	52.7765
#345			-0.7306	0
#346			57.3697	3.1638
#347			5.6369	102.132
#348			36.0979	102.632
#349			86.5011	100.384
#350			0.2964	54.472
#351			78.4453	-7.2961
#352			103.744	-0.2669
#353			-64.5076	8.4283
#354			16.7493	5.1503
#355			5.707	99.0644
#356			106.722	102.701
#357			99.0456	-17.7537
#358			0.0013	62.764
#359			-20.6937	50.3277
#360			24.706	-4.2803
#361			76.9324	-10.1557
#362			-49.895	-53.6619
#363			57.901	-0.6415
#364			0.2696	0.3253
#365			10.107	-97.0514
#366			44.6435	10.0356
#367			98.6459	-45.6965
#368			149.388	8.8597
#369			-0.5792	0.0915
#370			-12.9676	39.7373
#371			-0.4701	88.9998
#372			-21.5094	83.5859
#373			-0.6758	38.0727
#374			23.136	0.277
#375			-5.0816	116.502
#376			-30.4457	56.9501
#377			83.3265	62.3591
#378			104.437	-26.2452
#379			63.5934	81.1725
#380			111.781	75.7366
#381			64.1745	36.3696
#382			48.2634	72.3225
#383			-8.6659	78.2959
#384			94.5439	0
#385			2.0948	-0.1618
#386			73.2111	77.4375
#387			-7.2075	8.9821
#388			52.2065	1.0298
#389			14.7185	92.9173
#390			-23.0541	68.6692
#391			64.3547	75.5498
#392			-30.3562	15.1818
#393			77.6613	76.8184
#394			0.2542	120.488
#395			24.7997	118.869
#396			0.1862	0.0046
#397			80.7953	-36.1097
#398			14.689	-1.6292
#399			-0.0766	-0.0722
#400			0.3259	128.56
#401			58.8299	2.3111
#402			48.5667	13.3016
#403			1.9372	-20.3221
#404			-1.9631	-9.9337
#405			15.7538	-7.4579
#406			107.858	122.847
#407			59.2908	-69.4281
#408			-169.957	-32.0403
#409			97.1221	-0.0643
#410			48.8425	110.521
#411			-0.5383	-0.3974
#412			0.1287	-4.4467
#413			0.4028	-0.0773
#414			16.6855	24.6772
#415			-18.4039	63.471
#416			2.3132	79.557
#417			0.4458	59.0943
#418			-0.2139	0.3791
#419			56.5966	70.6891
#420			0.2797	34.7615
#421			12.1152	80.0023
#422			2.1637	81.8686
#423			38.667	0.2663
#424			-13.6097	-7.987
#425			49.7482	118.639
#426			17.1251	-69.971
#427			37.7849	0
#428			30.1815	20.174
#429			62.6026	0.336
#430			-117.135	9.9328
#431			-13.3049	-0.4264
#432			-27.4892	-169.682
#433			0.1202	83.1855
#434			-29.5788	0.8644
#435			119.362	0.7541
#436			13.8205	5.0375
#437			-39.6013	6.1503
#438			-0.0133	-0.2385
#439			73.6806	-210.133
#440			69.5638	1.0324
#441			0.0867	-0.0044
#442			28.1937	0.0019
#443			-0.2321	-3.8105
#444			2.6231	108.346
#445			-0.1036	10.9179
#446			-4.1066	72.6732
#447			92.0713
#448			-2.3049
#449			30.2646
#450			-0.9259
#451			70.1284
#452			0.232
#453			37.8299
#454			93.064
#455			-9.1777
#456			54.7242
#457			22.6473
#458			61.9971
#459			73.853
#460			7.4173
#461			3.496
#462			0.0148
#463			39.2722
#464			-53.1036
#465			2.9191
#466			51.8979
#467			24.5116
#468			-23.3735
#469			104.199
#470			-0.7322
#471			75.0292
#472			-5.0408
#473			-95.9106
#474			17.6851
#475			2.78
#476			103.338
#477			3.069
#478			78.0194
#479			-145.66
#480			0.0748
#481			81.7455
#482			3.5886
#483			-83.3283
#484			2.6348
#485			70.4584
#486			22.7079
#487			22.2608
#488			9.8561
#489			52.9469
#490			0.1231
#491			-16.0619
#492			99.1725
#493			-3.0636
#494			102.955
#495			0.0944
#496			35.763
#497			24.2727
#498			0.1119
#499			5.9991
#500			46.6205
#501			9.9982
#502			-1.3637
#503			54.9738
#504			-0.7196
#505			36.6675
#506			0.0152
#507			126.316
#508			132.596
#509			-1.1588
#510			-0.5341
#511			0.4753
#512			0.2199
#513			0.436
#514			0.178
#515			-160.483
#516			34.1998
#517			-8.8538
#518			0.2243
#519			0.1829
#520			59.5002
#521			25.1164
#522			54.633
#523			113.274
#524			37.5815
#525			-0.5266
#526			-1.124
#527			26.6611
#528			19.6142
#529			70.2247
#530			0.1363
#531			-0.0004
#532			73.4934
#533			106.122
#534			-0.2526
#535			62.9239
#536			-69.9408
#537			19.4825
#538			1.9305
#539			144.209
#540			-0.2365
