# Supplementary material for: Neural circuit mechanisms for transforming learned olfactory valences into wind-oriented movement
Source: eLife. 2023 Sep 18;12:e85756. doi: 10.7554/eLife.85756 (PMC10588983; doi:10.7554/eLife.85756)
Supplement: Figure 6—source data 7. [file elife-85756-fig6-data7.xlsx]

## Sheet: Sheet1
gemotype	w;w,20xUAS-CsChrimson-mVenus; +/Empty-split-GA4		w;w,20xUAS-CsChrimson-mVenus; +/MB077B		w;w,20xUAS-CsChrimson-mVenus; +/SS33918		w;w,20xUAS-CsChrimson-mVenus; +/SS33917
Initial Orientaion	downwind	upwind	downwind	upwind	downwind	upwind	downwind	upwind
#001	-0.047	1.6553	0.3102	0.0103	2.3434	0.2238	0.1478	4.1378
#002	2.2283	0.9709	1.0783	0.31	0.4467	2.3551	2.4424	3.8873
#003	0.9576	3.9138	0.5714	1.1452	3.7558	2.6956	1.4483	1.6885
#004	0.1113	1.1434	0.0019	3.8126	1.0396	3.9527	0.7899	0.8382
#005	1.3803	0.9431	1.1859	-0.0295	7.1849	2.07	0.718	1.1227
#006	0.5898	1.4167	2.7548	1.8082	0.7609	0.0012	3.7005	1.6978
#007	1.495	0.5002	0.7161	2.7319	0.6974	4.5589	4.2558	1.3344
#008	0.7154	0.3463	1.2277	0.286	2.7676	4.4171	3.9071	1.3704
#009	3.7619	0.3364	0.2864	3.0886	0.8592	-0.0015	0.8727	0.9475
#010	5.8954	0.298	0.4012	2.7778	3.4506	0.7011	-0.0257	0.91
#011	0.4218	3.7294	0.0111	0.801	2.9021	1.7067	0.0323	3.9645
#012	0.0197	1.2936	0.395	5.5336	2.4225	5.6845	0.7162	0.6649
#013	0.7716	2.23	0.0235	1.2781	1.1325	1.4532	4.5106	0.9468
#014	4.6426	4.9589	2.7698	0.7848	3.4645	0.4212	2.7606	1.3058
#015	1.6315	0.3499	2	2.1934	1.2799	0.0695	0.4283	5.8749
#016	1.4398	0.7901	1.0725	1.914	4.6533	4.0191	0.2249	2.6644
#017	0.6212	3.9274	0.8943	0.2839	2.3501	3.3786	0.4045	4.3951
#018	-0.0919	3.6173	0.033	2.1619	1.248	0.9537	1.6068	0.8223
#019	0.7157	0.3779	0.7415	2.5514	3.5067	3.6476	1.6932	1.0568
#020	0.9741	-0.0013	0.6013	0.9055	0.3881	4.2216	2.6889	0.1014
#021	0.0757	3.9758	0.4865	3.1578	0.7034	5.138	1.6261	2.129
#022	0.8375	3.6985	-0.0299	1.2799	1.9717	3.0345	0.6925	7.5574
#023	4.4232	2.7973	1.5547	0.5314	1.0632	1.5177	1.5676	1.0886
#024	0.9755	0.2639	0.962	0.1088	0.8154	0.6935	1.8309	0.0023
#025	0.0057	1.284	0.0001	0.5862	2.5987	3.5843	0.4237	2.8273
#026	0.3726	3.3648	0.8696	1.5872	1.1845	4.2877	2.1925	4.1595
#027	0.0871	2.4407	0.1736	0.2567	1.166	1.7093	0.4384	2.7609
#028	0.6289	1.9022	0.269	4.7088	1.7036	1.1875	0.0357	1.0248
#029	0.102	0.8018	0.0793	3.8828	1.7915	1.3985	0.8382	1.8697
#030	3.9953	0.6594	0.9189	0.4775	2.9931	2.8422	0.3651	3.783
#031	0.6838	0.6924	0.3576	1.0712	1.1034	3.0204	1.4343	6.1892
#032	0.8639	1.7375	0.5268	1.8803	1.204	4.1404	0.0057	3.5635
#033	0.48	2.5138	0.8123	1.5861	0.2046	0.0133	0.9564	4.8972
#034	0.9534	1.107	0.8869	3.0388	1.4443	0.5893	0.8614	3.3943
#035	0.7247	0.626	0.1172	2.6032	1.6134	3.1207	0.9362	2.4592
#036	1.4186	3.9887	2.9693	2.9076	4.0423	4.1309	3.3845	1.3167
#037	2.7988	0.3719	0.4823	0.5934	0.7841	1.0591	1.9676	2.9383
#038	0.4949	0.7281	0.0024	2.9789	0.5622	1.9426	3.5176	6.635
#039	-0.0044	3.3398	0.4373	0.6595	1.1472	1.2	1.1611	1.4071
#040	2.2143	0.6148	0.4103	3.4008	0.483	3.1025	2.2293	2.7349
#041	1.6115	0.2413	1.1273	0.8798	0.1636	3.0576	3.1652	2.0991
#042	0.2643	0.1255	1.0765	5.1986	0.1741	0.9305	1.7106	1.7829
#043	3.5007	0.4204	1.311	1.6833	0.0464	0.3111	0.7	1.8159
#044	0.9052	0.0391	1.6763	4.0415	2.6508	1.8337	1.0733	2.0956
#045	0.8794	0.3282	0.838	1.6556	1.7201	4.0932	0.0515	1.9002
#046	0.6871	2.3109	3.6944	3.139	0.8327	0.854	1.6079	4.515
#047	0.726	1.2955	0.7869	2.3939	0.9526	5.6031	1.8409	-0.0005
#048	0.5238	0.9849	0.0004	4.7462	0.2211	3.9242	0.9397	4.9776
#049	0.142	3.8455	2.2573	3.3323	0.2766	5.4523	1.7801	3.4644
#050	0.6723	-0.0457	0.09	3.8863	4.1085	5.3617	1.2805	4.3184
#051	2.5204	1.7487	0.0192	4.77e-05	0.0033	2.2415	1.7978	0.4346
#052	0.3861	0.533	0.568	-0.005	0.1983	5.2259	0.7304	1.2157
#053	0.0141	1.5576	0.129	1.5856	4.708	3.6641	0.5356	0.9112
#054	0.4457	1.2839	0.0114	0.1098	2.018	1.1715	0.4737	0.837
#055	0.1983	3.7621	1.594	0.6106	0.6816	2.909	2.6972	7.326
#056	1.0877	3.5761	3.2088	2.3372	1.0877	0.9949	0.3086	2.4742
#057	2.0631	1.7147	0.4888	1.4776	2.7477	0.965	0.4749	3.7024
#058	0.4951	0.5265	0.3235	0.2113	3.1311	3.1194	0.4163	3.5823
#059	1.0398	2.2022	0.8045	4.1155	0.9209	0.3114	2.7661	0.0195
#060	0.9322	0.088	1.9563	-0.0069	1.4791	1.2289	1.8343	0.2969
#061	1.1136	2.6403	1.1071	0.001	1.6567	1.5399	2.4377	4.8882
#062	1.9669	1.4919	0.0029	0.6792	0.9064	1.1954	3.6269	0.95
#063	1.5737	0.4371	0.0016	6.127	0.5717	4.178	0.0842	0.0723
#064	0.719	0.6618	0.0853	1.5044	0.6647	1.5624	0.4519	1.398
#065	0.6391	0.0041	0.4984	0.4504	0.6426	3.1368	3.3405	4.7718
#066	0.4793	1.5364	1.5122	0.6505	2.3628	4.9919	0.9227	2.0372
#067	0.0449	-0.0014	4.9585	2.3927	2.7507	0.8478	2.5542	1.3125
#068	0.72	3.3614	0.744	0.6674	2.1983	5.5317	1.1764	0.1882
#069	1.2887	0.9175	2.3037	2.8221	4.6232	-2.81e-05	1.7032	7.224
#070	1.407	3.6215	0.4556	4.5391	4.0663	2.926	0.02	2.178
#071	0.5773	0.8747	0.9905	2.6351	4.1624	4.929	0.8961	6.0334
#072	0.0246	0.8244	0.2457	2.3545	1.4484	0.6887	4.2782	2.4611
#073	1.0885	0.5534	1.051	2.0528	1.6584	5.4997	0.5705	3.3702
#074	2.3066	5.6987	2.0872	3.9999	2.2092	0.1801	0.3182	4.5729
#075	0.5753	1.1029	0.5094	1.2092	1.2978	3.5791	2.8065	5.2784
#076	-0.0017	4.1988	0.5058	2.6196	-2.96e-05	2.1405	0.915	2.0137
#077	0.2334	1.272	0.0041	3.2179	4.365	3.52	0.1314	5.0086
#078	2.6121	2.5048	0.0428	1.0627	1.7255	4.8761	1.5546	3.1902
#079	2.3526	-0.4496	0.0506	3.7716	3.9448	1.2767	0.0295	1.0141
#080	2.6829	0.2957	0.7676	0.8877	1.6527	4.6997	3.6067	1.187
#081	0.613	2.3163	1.0724	-0.0005	2.4218	2.3984	0.9804	1.2612
#082	0.079	3.7965	0.2985	0.9128	2.7815	3.3878	0.5977	5.3469
#083	0.0834	2.1863	1.168	3.0957	0.1317	2.5036	1.0737	1.1796
#084	0.0032	1.6434	0.4602	4.9536	0.4436	2.4231	0.8686	3.9609
#085	3.7423	0.2363	0.1371	5.615	0.9597	2.4756	0.05	3.2937
#086	1.4824	1.7351	-0.0003	4.146	2.9214	2.6422	0.7095	1.5073
#087	0.9778	0.1309	1.3914	0.7747	0.0303	4.2909	0.2459	0.4634
#088	2.7516	1.3993	4.0983	2.091	3.6171	2.9874	0.284	4.4327
#089	0.8744	2.1006	0.4737	5.2361	0.8509	0.6593	2.0775	4.7079
#090	0.352	0.891	0.0002	1.8717	1.2784	2.2919	0.1579	0.2747
#091	0.3849	1.8693	0.4163	0.5888	3.1561	1.9066	0.8303	4.1663
#092	1.4483	4.6999	0.0909	0.2955	6.2715	3.4135	0.6406	0.9139
#093	0.5455	4.1168	3.323	2.733	3.7904	5.0548	3.5666	1.1673
#094	0.5438	2.6325	0.9087	2.2304	2.2052	0.5251	0.3529	1.0177
#095	2.3226	0.4511	1.8013	0.7623	6.3841	0.922	1.5386	3.8625
#096	0.4753	-0.1039	2.121	3.6221	3.8299	4.102	0.1599	4.212
#097	2.4094	0.2653	0.1673	0.0123	5.79e-05	2.5788	0.1133	4.2148
#098	0.1686	0.9275	1.6164	0.4197	4.5507	10.7708	0.4026	4.2686
#099	1.3111	1.8454	1.4427	0.0056	1.4654	2.8454	3.4657	1.493
#100	0.8178	0.5609	0.4557	4.6228	3.1063	1.15	1.2416	1.9626
#101	3.9565	-0.1165	0.9361	1.1925	0.6466	0.1258	0.6931	3.2988
#102	3.4073	-0.127	1.5692	0.6468	3.2224	0.4702	4.8131	3.4382
#103	2.6978	1.6848	0.0381	3.096	1.4998	6.1348	4.5799	6.8632
#104	0.563	0.8365	1.2893	3.8219	1.1103	0.9909	0.9983	5.6072
#105	1.6221	0.9041	0.7233	0.4449	1.7842	0.0306	1.0017	5.811
#106	3.1529	0.1268	1.1634	1.7573	0.1642	6.0683	1.1435	0.1303
#107	0.0032	3.0845	1.5703	5.3701	0.3705	2.5453	0.0934	-0.0001
#108	1.9091	1.2318	2.7092	2.6899	0.0013	-0.052	-0.0455	5.0015
#109	2.0768	0.3437	0.9751	3.0006	0.6563	0.0057	0.1349	2.3378
#110	0.8942	1.9439	0.0494	0.9002	2.7715	0.0905	1.6551	0.8511
#111	1.3016	0.0938	1.0545	2.8325	1.652	0.9668	1.1868	0.1279
#112	1.1307	2.6644	0.9704		5.303	0.2315	0.9087	0.4174
#113	0.0121	0.569	0.0439		2.715	3.3166	1.4507	0.3139
#114	1.1892	2.3439	1.6463		6.9935	2.9313	1.004	4.9118
#115	2.158	1.5028	3.6412		0.6835	1.5466	0.602	1.749
#116	1.5878	2.3098	1.5465		0.9291	5.0553	2.3704	0.4377
#117	0.6122	0.8867	0.2882		0.0303	1.8204	0.0458	0.2478
#118	0.2359	2.9591	1.0315		6.8728	0.226	2.9406	0.9774
#119	3.2418	1.0102	1.8288		1.5636	3.8508	2.8596	0.3262
#120	0.0326	1.9727	0.4035		0.988	6.0738	1.4714	0.3407
#121	1.72	0.8318	0.1939		3.2134	3.7302	1.0433	5.8106
#122	3.1022	1.5722	1.3937		-0.0004	1.5662	1.9679	3.4433
#123	0.9305	0.0618	0.1959		-3.6e-05	0.1672	1.099	2.3458
#124	0.4264	2.0957	2.7349		2.9351	1.4044	0.6231	0.6651
#125	2.0319	0.5671	0.1551		1.0222	0.036	0.9671	4.1512
#126	1.4408		2.4287		2.7198	2.6081	1.3867	1.8528
#127	2.5615		0.3649		0.6279	1.5712	9.8e-05	3.3462
#128	1.5996		0.0318		4.9816	0.0853	0.3119	4.9784
#129	5.6341		2.7536		1.7117	4.8761	1.049	3.4931
#130	3.8797		1.824		0.7882	1.9052	0.3601	1.0677
#131	3.8958		0.0768		0.6833	0.9817	2.0392	0.8882
#132	1.8368		1.7128		2.9868	4.1958	0.6326	1.3558
#133	1.7513		1.697		0.4868	1.7599	4.185	0.3491
#134	1.2917		0.6036		2.4907	0.985	0.0071	0.2354
#135	0.5751		1.0547		3.2848	6.697	0.9011	0.2962
#136	1.5597		0.0133		8.9189	3.9116	1.1763	0.073
#137	2.1381		0.7354		5.3764	1.5499	0.799	7.8107
#138	1.3516		0.275		1.2322	3.6435	0.1777	2.0143
#139	0.5737		2.9679		3.2276	2.183	0.6984	1.81
#140	2.0346		1.5128		2.5726	2.8713	1.1165	0.6162
#141	1.0252		1.9294		3.5683	1.3909	3.5352	3.153
#142	0.3233		2.0087		0.653	1.2441	1.6201	0.3661
#143	0.4073		1.7797		3.4087	1.2826	5.1017	3.7019
#144	0.8036		0.1419		1.7805	1.4677	0.2652	6.7706
#145	1.9842		1.3192		3.4118	3.3425	1.8031	1.1147
#146	0.059		0.2642		3.8627	0.0673	1.98	0.7539
#147	3.7407		0.2275		1.0574	-0.5904	1.8167	0.1923
#148	1.1168		1.0781		4.4504	5.6161	-1.0457	2.9366
#149	2.3189		1.0201		6.0653	0.9949	1.7358	2.0923
#150	1.5993		0.4196		4.0546	1.4395	2.9411	6.0092
#151	1.9171		0.6427		1.023	2.3929	0.2983	2.1533
#152	0.9955		1.2369		2.2254	1.4068	1.2856	2.5437
#153	2.3174		0.0301		5.7531	2.9929	-4.03e-05	3.0112
#154	1.5685		3.5687		0.5484	2.3292	2.7656	6.1649
#155	1.6761		2.6744		0.8984	5.7326	3.5524	2.2142
#156	0.1405		5.5077		4.0448	2.1163	2.7251	2.1528
#157	1.2529		0.8006		2.5488	2.8589	1.7074	0.5019
#158	2.6044		0.0913		0.2513	4.4528	1.726	2.0612
#159	1.0926		0.3391		0.5272	0.0535	1.3746	1.2794
#160	0.6404		1.7066		2.7771	2.8553	0.3868	2.4354
#161	1.8522		0.3091		2.0438	0.0004	1.3049	3.3914
#162	1.7292		5.8047		5.7256	0.0817	3.0657	1.111
#163	0.3251		2.7155		2.4696	3.5188	3.825	1.3931
#164	3.8956		0.8572		5.2062	3.8759	1.4682	0.6236
#165	0.9539		4.4411		3.1626	6.0641	1.9564	2.0136
#166	0.9719		4.0216		0.5983	8.3687	0.1035	0.0824
#167	-0.0067		0.4875		0.92	3.8841	3.2871	3.135
#168	0.8032		0.4872		2.6783	3.5181	1.6769	4.818
#169	0.1947		3.7821		-0.047	2.2035	0.1113	1.8272
#170	1.8511		1.0978		3.8112	1.3539	3.477	4.5867
#171	0.4856		1.373		4.0804	2.5499	4.6849	1.065
#172	-0.0038		1.6166		0.0646	3.8466	2.4499	0.7631
#173	1.0672		0.8549		0.1059	3.1848	2.0852	4.3952
#174	0.3636		1.3962		2.1792	3.4864	3.0577	3.2028
#175	2.5349		-0.0004		3.3395	2.8168	0.4108	3.8126
#176	0.4336		0.0036		2.8185	4.9739	0.7018	0.7428
#177	0.6019		2.8168		3.1732	0.5075	1.7883	6.8096
#178	0.4027		-0.0036		0.0569	2.2312	2.2752	0.6483
#179	0.892		0.8949		3.4401	5.0008	0.3859	2.8766
#180	1.1971		1.7526		0.8947	4.7473	1.1891	4.9811
#181	6.2735		1.2893		2.7067	4.3047	1.3489	2.6962
#182	0.0196		1.0795		1.462	1.2703	4.2286	8.0485
#183	3.8519		1.8047		0.7047	1.2261	0.163	2.2836
#184	1.4469		3.4394		5.7164	0.1247	1.3409	5.8906
#185	2.9558		0.0697		1.3456	5.792	5.7804	1.0976
#186	3.6733		-0.0056		0.8892	4.3022	3.6364	3.6945
#187	0.622		1.356		3.2488	3.7482	1.4245	4.5153
#188	0.7445		2.5925		0.4229	1.4043	1.9411	3.858
#189	-0.0123		0.8087		5.1305	4.3772	0.5313	2.7282
#190	1.1795		0.5574		3.5891	0.2684	0.9702	1.9471
#191	1.3144		0.0417		2.4397	2.189	0.3832	0.3994
#192	0.4238		1.4509		1.2206	2.4848	0.8583	7.1791
#193	1.7628		0.7155		1.1872	5.701	0.5434	3.915
#194	-0.0224		0.2424		-0.0136	2.5382	2.5875	5.6676
#195	3.5		2.3138		2.4336	1.3581	2.2604	2.0536
#196	0.5009		0.3224		3.1832	7.2716	1.4548	1.2717
#197	0.2368		1.526		0.2446	1.281	4.4307	5.9588
#198	1.1409		1.1364		1.5546	3.434	0.1415	4.8834
#199	0.6422		-0.0061		4.1253	1.9968	0.2527	2.5539
#200	2.3229		1.3371		4.5185	4.3826	1.9926	0.6784
#201	0.1172		0.1771		0.4339	5.785	2.2008	1.2632
#202	1.1362		2.104		7.4556	2.1292	0.6065	1.1483
#203	0.1768		0.2148		0.5289	6.4608	2.5902	6.3416
#204	0.6283		2.8251		-0.0364	4.4899	0.0003	3.2829
#205	1.8026		0.777		5.3324	4.3108	0.4315	0.7447
#206	-0.0006		1.2252		0.2156	4.5078	2.8652	2.4729
#207	-0.0227		2.0639		2.978	1.059	1.8387	0.9785
#208	1.7709		0.6091		5.9877	3.1306	2.2084	3.3731
#209	1.1327		0.5794		1.9785	2.6529	0.0518	1.5201
#210	1.9146		0.001		0.4322	2.2038	2.0144	3.0143
#211	1.2302		0.0189		0.2894	5.1451	0.6872	1.2411
#212	1.1657		0.5734		2.7378	-0.6385	4.4252	4.4553
#213	1.8698		0.5063		6.5605	0.0046	0.431	0.0191
#214	0.0031		0.8804		2.2314	3.8398	1.5475	0.831
#215	0.0945		0.5314		1.0488	6.5033	1.78	0.1461
#216	0.4101		1.4079		0.9694	3.8237	0.5937	4.1431
#217	2.8828		2.338		4.6501	3.75e-05	0.9692	2.5764
#218	0.4745		1.8412		2.6507	4.624	1.1797	1.4248
#219	1.3187		2.3129		3.1567	6.1804	0.181	2.399
#220	2.23		0.4829		0.4533	4.2529	0.361	4.604
#221	1.7969		1.4834		3.6176	2.6841	0.1629	1.9226
#222	-0.0016		0.8698		3.8598	2.8771	2.6244	3.5145
#223	2.1042		0.1072		4.8194	0.0196	2.6202	2.8334
#224	1.2623		4.185		3.1353	2.363	2.8092	4.185
#225	0.7485		0.0569		3.7654	1.7345	1.4971	2.569
#226	0.0722		3.011		1.2252	1.2863	4.9117	2.0596
#227	8.1457		2.2396		6.8099	0.3349	0.2698	0.208
#228	0.0036		0.2506		1.9646	0.6404	0.6019	1.0403
#229	1.9498		0.0034		3.3272	1.3156	2.3039	6.5392
#230	0.7875		1.3422		0.6729	6.0348	2.4715	3.7801
#231	1.7049		2.6645		1.1976	2.3991	2.3722	0.2562
#232	0.7979		0.8682		2.5776	9.33e-05	2.6997	1.3528
#233	1.9471		0.651		2.0537	3.204	1.7781	2.6485
#234	0.631		0.0086		3.6033	1.2878	2.9583	0.9366
#235	3.7759		1.6822		0.121	2.3122	3.9779	1.8144
#236	-0.1503		1.5341		1.1113	-3.72e-05	2.5951	3.0747
#237	0.0374		0.9911		0.7152	1.6684	1.5356	1.1594
#238	-0.0008		1.3599		1.1036	1.7901	1.02	1.2216
#239	3.3706		0.0307		6.6857	1.0449	3.0378	0.3015
#240	1.6976		0.0263		1.179	0.8031	2.5649	3.1357
#241	0.8562		2.4154		0.6039	3.3697	2.0242	3.3797
#242	0.8846		0.3548		1.4088		0.7722	1.4723
#243	1.9159		1.9359		2.2429		0.0079	1.4894
#244	-0.002		3.2148		3.7029		1.8506	5.2745
#245	2.0201		1.254		0.5267		2.5679	1.7065
#246	2.7963		0.3196		0.9564		2.8765	5.222
#247	0.0779		0.0817		3.9016		2.2898	2.6935
#248	0.2726		1.2758		1.7809		1.0576	0.6688
#249	0.2251		-0.0007		2.3606		2.1997	2.1428
#250	0.5543		2.0758		2.8523		1.357	0.6234
#251	1.321		0.4411		1.1555		2.2661	4.5187
#252	0.9054		0.4409		2.6258		3.0086	3.2424
#253	0.9072		0.5061		4.8788		0.7545	2.4586
#254	3.1899		0.6577		3.3889		1.2591	4.0459
#255	0.4754		1.9485		2.9019		0.3696	6.0649
#256	1.2811		0.9502		3.3063		2.6531	1.6416
#257	0.4946		0.1975		-0.0994		3.5539	3.2719
#258	0.7025		0.9081		0.5225		1.833	3.034
#259	0.0473		0.4174		0.8445		2.8669	1.6452
#260	0.3077		2.1098		1.6101		1.6054	5.0693
#261	2.154		2.1722		0.9037		1.746	1.439
#262	0.6307		0.5573		5.6488		-0.1287	2.1715
#263	0.7074		0.6604		3.8084		0.0307	3.3845
#264	1.0434		0.7302		6.4305		1.8419	3.9418
#265	0.7635		0.7218		3.7373		0.6374	0.8617
#266	0.125		0.9066		-0.0108		1.8877	0.158
#267	6.1136		2.7221		0.405		0.6098	0.4077
#268	0.8563		0.2501		2.6528		1.9965	1.0927
#269	0.5315		1.6623		2.328		3.9557	1.6308
#270	2.1325		0.3698		2.7363		2.5539	0.1485
#271	-0.0011		1.6687		2.54		0.1531	0.0869
#272	0.7474		2.2101		2.2728		-0.0003	0.0668
#273	6.5157		0.008		2.4558		1.5043	0.6388
#274	0.0079		0.0055		3.656		1.4206	2.7706
#275	4.3919		1.5562		1.9532		2.7737	1.0621
#276	2.2195		1.4289		2.9727		1.4204	2.6212
#277	4.4264		0.4508		4.2324		2.2745	0.6792
#278	0.1068		0.4999		4.3025		3.4209	-0.6048
#279	0.8904		0.1156		3.1603		1.5476	3.0651
#280	1.1057		0.7848		4.8692		0.9279	2.8051
#281	0.7771		1.872		3.7451		1.7002	2.9073
#282	1.7006		0.0598		5.3094		2.1762
#283	1.0706		1.3098		4.4894		0.1332
#284	0.5481		1.4079		3.6725		0.4397
#285	1.5675		0.8217		4.8817		2.9449
#286	0.4354		1.6567		3.2012		2.4286
#287	2.8572		0.4525		2.6354		4.0951
#288	1.8833		1.1116		2.7937		2.0987
#289	1.2724		0.2254		3.7612		9.28e-05
#290	1.4739		3.2862		0		2.8565
#291	1.4988		1.4619		0.5462		0.0031
#292	-0.741		1.2191		5.6942		1.0488
#293	6.4146		0.3438		3.7732		0.3115
#294	0.5534		0.4846		0.3054		3.4151
#295	1.5893		2.4172		4.8532		0.0594
#296	2.2816		0.8398		2.619		0.2418
#297	0.1602		1.2633		4.989		0.931
#298	0.2236		0.7149		2.7724		4.4795
#299	1.1276		1.1333		0.4429		2.1451
#300			0.9522		0.6503		1.9922
#301			1.0226		2.7118		2.0684
#302			0.0069		0.1949		1.8701
#303			-0.0124		1.3451		4.4728
#304			0.0004		0.0022		3.5847
#305			2.2655		0.458		1.9657
#306			2.5622		4.6036		1.9878
#307			0.008		0.7395		2.4078
#308			0.0553		0.9892		0.8337
#309			0.0977		2.0442		1.3323
#310			1.3409		3.2813		2.6926
#311			0.1144		3.5824		2.345
#312			1.2735		5.2586		2.2107
#313			3.6512		1.3695		3.8728
#314			0.0291		2.1162		0.1488
#315			1.5686		0.6846		2.6769
#316			0.2933		6.6022		3.5142
#317			1.6459		1.749		3.6128
#318			0.4927		0.1824		1.7853
#319			0.0126		0.235		5.6429
#320			3.5184		3.0867		1.0728
#321			0.7374		3.3444		1.8659
#322			1.6464		1.7772		2.4273
#323			0.0159		1.6178		0.4861
#324			0.1163		1.1645		2.3864
#325			1.0995		0.8527		3.2676
#326			0.5756		3.2741		3.4243
#327			0.6592		1.8265		3.3727
#328			1.3584		4.5671		2.5989
#329					0.1601		0.0918
#330					-0.0033		1.3444
#331					5.8237		2.2383
#332					0.2539		2.0007
#333					0.5009		0.1849
#334					3.5681		2.1621
#335					0.7736		1.2362
#336					1.1911		0.9338
#337					0.3946		2.591
#338					1.0798		0.0911
#339					2.1198		2.695
#340					0.8624		0.3231
#341					0.6668		0.586
#342					2.087		3.2543
#343					2.0834		2.6284
#344					1.2912		2.6901
#345					4.6734		2.8885
#346					0.0076		1.2565
#347					-0.0058		4.3035
#348					0.2596		2.452
#349					0.5991		0.958
#350					6.4071		1.6695
#351					1.0753		1.4079
#352					3.8968		2.3975
#353					1.6207		1.4596
#354					1.6764		1.4191
#355					3.2918		2.0843
#356					1.7925		3.3585
#357					3.1104		4.8932
#358					0.0084		1.2424
#359					2.4071		0.1102
#360					1.4544		2.1919
#361					1.9345		2.9463
#362					2.0899		1.7043
#363					1.4623		4.7382
#364					4.9707		0.7813
#365					3.0702		0.4785
#366					0.2685		0.1043
#367					0.6363		2.3039
#368					0.1942		2.1949
#369					2.1523		3.8052
#370					3.1707		1.1545
#371					0.0001		0.5127
#372					2.8805		3.6375
#373					1.042		-0.0131
#374					1.6269		5.6494
#375					2.5655		2.8306
#376					4.7013		0.2611
#377					3.9917		0.7439
#378					0.1983		0.6353
#379					0.8957		2.1171
#380					1.9659		2.6276
#381					1.8804		0.9311
#382					-0.0153		2.6401
#383					1.204		1.5187
#384					0.0004		3.6499
#385					1.1197		2.746
#386					3.9612		0.7641
#387					4.3241		1.7019
#388					0.0004		-0.1974
#389					0.6481		4.7242
#390					2.6118		3.3905
#391					1.5211		2.6918
#392					1.7173		4.7405
#393					4.0345		0.6916
#394					0.0047		4.7495
#395					5.615		3.169
#396					3.5415		1.1265
#397					3.5719		2.1188
#398					6.2087		4.6541
#399					0.9218		2.5434
#400					0.3909		0.4808
#401					0.0786		0.9115
#402					0.2157		2.0199
#403					0.0001		0.4313
#404					0.0992		2.7901
#405					2.0404		1.23
#406					0.2708		1.1084
#407					0.3869		2.1004
#408					1.1431		3.6915
#409					0.3392		0.2376
#410					0.3377		2.2125
#411					3.417		0.4
#412					0.9961		1.0412
#413					0.5021		2.5983
#414					0.026		0.9905
#415					0.9021		-0.0352
#416					2.9103		2.2521
#417					0.6806		0.4002
#418					3.6683		1.0049
#419					6.61e-05		1.088
#420					2.3951		0.5738
#421					1.2337		3.4491
#422					3.5498		0.0428
#423					-0.0299		1.6238
#424					0.793		2.0575
#425					4.1064		0.0705
#426					2.1577		0.3615
#427					1.987		1.321
#428					2.0621		0.0382
#429					1.3739		0.1257
#430					0.651		0.4124
#431					2.3035		4.7073
#432					1.129		2.1245
#433					0.265		1.1125
#434					0.82		0.1012
#435					4.0863		2.9004
#436					1.1763		4.4168
#437					1.6517		0.9659
#438					6.9784		3.0192
#439					2.8044		4.0342
#440					2.1774		0.566
#441					3.524		0.9793
#442					2.6497		0.097
#443					2.2007		2.1969
#444					0.0018		-0.4534
#445					3.4618		2.3781
#446					2.1562		1.2543
#447					5.3677		1.0274
#448					0.4694		1.3925
#449					0.9322		0.7158
#450					0.0005		1.8823
#451					0.208		1.4024
#452					0.9353		1.9573
#453					3.0568		1.0091
#454					1.3059		3.7486
#455					1.2335		2.6046
#456					-5.5e-05		0.7362
#457					4.24		0.2639
#458					-0.0072		1.8655
#459					0.0942		0.2036
#460					0.7308		1.9211
#461					1.0418		0.6227
#462					2.567		3.1741
#463					0		1.3006
#464					2.0934		1.3622
#465					3.3412		1.2538
#466					0.1147		2.6898
#467					1.5059		3.7628
#468					-0.0002		2.1436
#469					2.5505		0.827
#470					2.337		4.8777
#471					1.0362		-0.0202
#472					1.89		0.5038
#473					0.0047		1.2487
#474					0.2747		5.0094
#475					2.4805		0.6336
#476					3.1043		3.1702
#477					1.3183		0.6758
#478					7.49e-05		1.5331
#479					0.2802		0.219
#480					0.2402		0.8771
#481					1.9607		1.3564
#482					2.1804		2.4194
#483					5.5014		1.9922
#484					0.7358		2.1704
#485					1.4733		1.4506
#486					0.6873		5.9298
#487					4.2479		1.4091
#488					2.7862		0.0894
#489					2.4549		0.1271
#490					3.052		0.1486
#491							0.9306
#492							1.5042
#493							2.3889
#494							5.7757
#495							1.4704
#496							1.2585
#497							0.5602
#498							2.1531
#499							2.3717
#500							0.4079
#501							1.8127
#502							3.5047
#503							3.1205
#504							1.4572
#505							1.3254
#506							1.4746
#507							1.1268
#508							0.7261
#509							1.3812
#510							1.0469
#511							3.5456
#512							0.3559
#513							0.51
#514							1.7877
#515							0.6537
#516							-0.0136
#517							2.9236
#518							0.4241
#519							1.6363
#520							0.6044
#521							0.1898
#522							0.9447
#523							1.577
#524							0.2301
#525							0.6008
#526							0.3666
#527							3.8139
#528							0.8504
#529							1.8628
#530							0.3511
#531							3.2327
#532							0.7515
#533							1.4961
#534							1.2846
#535							0.8434
#536							2.8666
#537							3.6836
#538							0.1417
#539							1.261
#540							4.273
#541							3.789
#542							1.5578
#543							2.8862
#544							2.9036
#545							0.4573
#546							0.402
#547							1.2818
#548							1.1017
#549							3.4065
#550							1.0862
#551							0.4319
#552							3.2759
#553							2.6374
#554							1.244
#555							1.6829
#556							3.0792
#557							1.1663
#558							0.5397
#559							0.4094
#560							3.7474
#561							2.0283
#562							2.1289
#563							0.8035
#564							5.2913
#565							-0.0099
#566							2.2131
#567							1.2969
#568							2.4361
#569							0.7903
#570							0.2883
#571							1.3981
#572							1.7163
#573							0.4898
#574							5.1563
#575							2.0581
#576							0.1512
#577							1.8149
#578							2.3487
#579							2.617
#580							0.4389
#581							5.2193
#582							1.9659
#583							1.5972
#584							3.0575
#585							1.789
#586							0.8687
#587							0.5271
#588							1.2567
#589							1.3109
#590							1.8513
#591							3.548
#592							1.0183
#593							2.0838
#594							0.9526
#595							0.6718
#596							2.0127
#597							2.3021
#598							5.8909
#599							2.7699
#600							0.2427
#601							1.0998
#602							2.3218
#603							0.0005
#604							0.4779
#605							1.4918
#606							0.474
#607							0.0016
#608							1.5336
#609							2.0487
#610							2.5406
#611							1.1056
#612							1.5522
#613							2.2254
#614							4.2931
#615							1.7993
#616							1.5435
#617							0.495
#618							2.7761
