# Supplementary material for: Neural circuit mechanisms for transforming learned olfactory valences into wind-oriented movement
Source: eLife. 2023 Sep 18;12:e85756. doi: 10.7554/eLife.85756 (PMC10588983; doi:10.7554/eLife.85756)
Supplement: Figure 7—figure supplement 1—source data 1. [file elife-85756-fig7-figsupp1-data1.xlsx]

## Sheet: Sheet1
Data_Type	female	male	protocol	Movie	Arena	Camera	Time	N-movies	0.333333	0.666667	1	1.33333	1.66667	2	2.33333	2.66667	3	3.33333	3.66667	4	4.33333	4.66667	5	5.33333	5.66667	6	6.33333	6.66667	7	7.33333	7.66667	8	8.33333	8.66667	9	9.33333	9.66667	10	10.3333	10.6667	11	11.3333	11.6667	12	12.3333	12.6667	13	13.3333	13.6667
DeltaDistanceFromCenter	Empty-split	20xUAS-CsChrimson-mVenus-attP18	6xLED020-10s-NoOdor-0mLAir	AirLED	olfactoryArena1	Cam0	20220413T193122	6	-0.026561	-0.0151482	-0.00402713	0.000220578	0.00236604	0.00437944	0.00979955	0.0104077	0.0130026	0.0240646	0.0300348	0.02344	0.02129	0.0117329	0.00958251	0.0101297	0.0133776	0.00973961	0.00562447	0.00088842	-0.000376915	-0.0014023	-0.0185579	-0.0176645	-0.00787663	0.00430694	0.00830433	0.00497659	0.000879238	0	0.00644858	0.00583911	0.00216432	-0.00445325	-0.0069533	-0.000694527	0.00838288	0.00608084	0.00521289	0.00774511	0.0057568
DeltaDistanceFromCenter	Empty-split	20xUAS-CsChrimson-mVenus-attP18	6xLED020-10s-NoOdor-0mLAir	AirLED	olfactoryArena1	Cam0	20220413T194652	6	-0.0357146	-0.0340084	-0.0397979	-0.0401448	-0.0403193	-0.0429131	-0.0428918	-0.0402926	-0.0446145	-0.0479426	-0.0330629	-0.0367063	-0.039994	-0.0420144	-0.0407136	-0.0430885	-0.0485602	-0.0506735	-0.0545949	-0.0478348	-0.0456642	-0.0396695	-0.0341585	-0.0355808	-0.0339372	-0.0238432	-0.0164484	-0.00926799	-0.0102052	0	0.00351828	0.0050338	0.00328884	0.00501034	0.00477877	0.0123833	0.0180127	0.0251734	0.0364713	0.0418668	0.0408854
DeltaDistanceFromCenter	Empty-split	20xUAS-CsChrimson-mVenus-attP18	6xLED020-10s-NoOdor-0mLAir	AirLED	olfactoryArena1	Cam0	20220413T194857	6	0.0383469	0.0375254	0.0332436	0.031624	0.0310132	0.0264245	0.0230498	0.014234	0.00479704	6.1938e-05	-0.000236867	-0.000372761	-0.00149759	-0.00454352	-0.00593608	-0.00538342	-0.00394153	0.000748842	0.0162145	0.0174543	0.0211503	0.0245055	0.0235598	0.0205616	0.0222061	0.0139799	0.0116344	0.00462398	0.00223202	0	-0.00131978	0.00315224	0.00316929	-0.00405843	-0.0146795	-0.0255198	-0.0344412	-0.0390124	-0.0327085	-0.0318597	-0.0400602
DeltaDistanceFromCenter	Empty-split	20xUAS-CsChrimson-mVenus-attP18	6xLED020-10s-NoOdor-0mLAir	AirLED	olfactoryArena1	Cam0	20220418T140041	6	-0.0402482	-0.039901	-0.0373343	-0.0356957	-0.0359137	-0.0345097	-0.0446337	-0.0498656	-0.0490932	-0.0462073	-0.047101	-0.0431397	-0.0361326	-0.0321467	-0.0329314	-0.0345797	-0.0370171	-0.0367212	-0.0317682	-0.0287338	-0.0259918	-0.026699	-0.0256124	-0.023193	-0.0204924	-0.0144534	-0.00810389	-0.00439204	-0.00325273	0	0.00123529	-0.0126762	-0.0226106	-0.0292072	-0.0383243	-0.039822	-0.0442153	-0.0454903	-0.0387439	-0.0316439	-0.022695
DeltaDistanceFromCenter	Empty-split	20xUAS-CsChrimson-mVenus-attP18	6xLED020-10s-NoOdor-0mLAir	AirLED	olfactoryArena1	Cam0	20220430T002846	6	0.00618174	0.00137749	-0.00432972	-0.00194129	-0.00425053	-0.0131795	-0.0193071	-0.019648	-0.0178667	-0.0133514	-0.0121037	-0.0109469	-0.0106536	-0.00931375	-0.00795955	-0.00684486	-0.00657885	-0.00598089	-0.00750579	-0.00794169	-0.0107818	-0.0126172	-0.0152819	-0.0192569	-0.0226353	-0.0243636	-0.0220515	-0.0205225	-0.0130763	0	0.0131546	0.0180568	0.0206735	0.022194	0.018386	0.017134	0.0195331	0.0208527	0.0244598	0.0251734	0.0218795
DeltaDistanceFromCenter	Empty-split	20xUAS-CsChrimson-mVenus-attP18	6xLED020-10s-NoOdor-0mLAir	AirLED	olfactoryArena1	Cam0	20220430T003454	6	-0.0588791	-0.0579697	-0.0593896	-0.0593995	-0.0549141	-0.0478463	-0.042989	-0.0395119	-0.0337653	-0.0226938	-0.0158244	-0.0138123	-0.0167193	-0.0167727	-0.0201701	-0.0279818	-0.0327023	-0.0304652	-0.0333283	-0.036967	-0.0378376	-0.0395037	-0.0417139	-0.0354471	-0.0306447	-0.0235657	-0.0139712	-0.00559994	-0.000949693	0	0.00184102	0.00537323	0.00523347	0.00209459	-0.00520135	-0.0054837	0.000398997	-0.00193528	-0.00497672	-0.00584215	-0.00613237
DeltaDistanceFromCenter	Empty-split	20xUAS-CsChrimson-mVenus-attP18	6xLED020-10s-NoOdor-0mLAir	AirLED	olfactoryArena1	Cam1	20220413T193122	6	-0.010777	-0.00126174	0.00582622	0.00692895	0.00654974	0.00073833	-0.00720404	-0.00120996	0.0113239	0.0185887	0.0181358	0.0152282	0.0179202	0.0196327	0.0176718	0.0142092	0.0115805	0.0109402	0.0103306	0.00789996	0.00243998	0.000370717	-0.00258208	-0.00846384	-0.0170262	-0.0138653	-0.00882011	-0.00766103	-0.00277592	0	0.00692205	0.00729365	0.00662	0.00737154	0.0150044	0.015403	0.0177116	0.0237271	0.0302096	0.0261693	0.017221
DeltaDistanceFromCenter	Empty-split	20xUAS-CsChrimson-mVenus-attP18	6xLED020-10s-NoOdor-0mLAir	AirLED	olfactoryArena1	Cam1	20220413T194652	6	0.0626089	0.0600633	0.059004	0.0487381	0.0384251	0.0306716	0.0259059	0.0210643	0.017552	0.0162314	0.0146593	0.0155837	0.0198184	0.0219252	0.0268661	0.0286735	0.0313358	0.0338454	0.0375474	0.0356757	0.0270861	0.0184765	0.00666005	0.000853011	0.00303562	0.00308441	0.00216691	-0.00119309	-0.00363215	0	0.00469289	0.00232314	0.00570505	0.0145773	0.0224929	0.0266621	0.0248505	0.0245049	0.0229916	0.0260557	0.0334812
DeltaDistanceFromCenter	Empty-split	20xUAS-CsChrimson-mVenus-attP18	6xLED020-10s-NoOdor-0mLAir	AirLED	olfactoryArena1	Cam1	20220413T194857	6	-0.0372617	-0.0350933	-0.0346232	-0.0391569	-0.0487836	-0.0564026	-0.0623585	-0.0723132	-0.0826763	-0.0897636	-0.102668	-0.110295	-0.116347	-0.118558	-0.113918	-0.101597	-0.087591	-0.073001	-0.0607942	-0.0565699	-0.0545645	-0.0566391	-0.0531579	-0.0572581	-0.0570072	-0.0518085	-0.0361812	-0.0246125	-0.0111368	0	0.0134299	0.0228137	0.0241916	0.0172264	0.00753627	-0.00391703	-0.00198886	0.00536924	0.0130937	0.0240402	0.0318916
DeltaDistanceFromCenter	Empty-split	20xUAS-CsChrimson-mVenus-attP18	6xLED020-10s-NoOdor-0mLAir	AirLED	olfactoryArena1	Cam1	20220418T140041	6	-0.026769	-0.0227675	-0.0195665	-0.0144995	-0.0146865	-0.01437	-0.0114056	-0.0097595	-0.00743296	-0.00435961	-0.00189879	0.00168066	0.00265801	0.00329194	0.00438104	0.00743161	0.00682614	0.00701537	0.00802139	0.00802207	0.00608099	0.000508398	-0.000308576	0.00220281	0.00344139	0.000601157	-0.00328033	-0.00436156	-0.00288329	0	-0.00574673	-0.0137202	-0.0102224	-0.0112537	-0.0108145	-0.0106034	-0.0101272	-0.0137657	-0.0197533	-0.0206655	-0.0156331
DeltaDistanceFromCenter	Empty-split	20xUAS-CsChrimson-mVenus-attP18	6xLED020-10s-NoOdor-0mLAir	AirLED	olfactoryArena1	Cam1	20220418T142104	6	-0.00134738	0.000964819	0.000775228	-0.00378941	-0.00718314	-0.0166726	-0.0257211	-0.0318493	-0.0364413	-0.0395336	-0.0416341	-0.0448363	-0.0464793	-0.0437386	-0.0439158	-0.0501016	-0.0423799	-0.0354596	-0.0300458	-0.0238661	-0.0217756	-0.0212385	-0.0198958	-0.0186443	-0.0141591	-0.0101895	-0.00603119	-0.00419917	-0.00127427	0	-0.00198029	-0.0135528	-0.0141791	-0.0151351	-0.018144	-0.0279694	-0.0386064	-0.0433676	-0.0355409	-0.024539	-0.0078231
DeltaDistanceFromCenter	Empty-split	20xUAS-CsChrimson-mVenus-attP18	6xLED020-10s-NoOdor-0mLAir	AirLED	olfactoryArena1	Cam1	20220420T171128	6	-0.0619572	-0.053408	-0.0443047	-0.0338177	-0.030853	-0.0277362	-0.0298858	-0.0277077	-0.0304665	-0.0327496	-0.0398099	-0.0434828	-0.0437653	-0.0439984	-0.0465088	-0.048727	-0.0458068	-0.0485319	-0.043555	-0.0342209	-0.0224847	-0.0145403	-0.0105888	-0.00360432	-0.00422057	-0.00105804	0.00410613	0.00367347	-0.000312979	0	-0.00494489	-0.0164589	-0.0181124	-0.0155014	-0.0225087	-0.029798	-0.0387533	-0.0334876	-0.0295187	-0.0327155	-0.0285671
DeltaDistanceFromCenter	Empty-split	20xUAS-CsChrimson-mVenus-attP18	6xLED020-10s-NoOdor-0mLAir	AirLED	olfactoryArena1	Cam1	20220430T002846	6	0.0875157	0.0914466	0.0849451	0.0834649	0.0843358	0.0899579	0.0836431	0.0853413	0.0754283	0.0736641	0.0709156	0.0798994	0.0854811	0.0795251	0.0798264	0.0681967	0.0676014	0.0584894	0.0513591	0.0495929	0.052213	0.0479601	0.0414377	0.0322743	0.0229925	0.0131677	0.00602253	0.0108589	0.0069584	0	-0.0059848	-0.0130226	-0.0240575	-0.0248052	-0.0303608	-0.030902	-0.0277248	-0.032196	-0.0345333	-0.0284703	-0.0267355
DeltaDistanceFromCenter	Empty-split	20xUAS-CsChrimson-mVenus-attP18	6xLED020-10s-NoOdor-0mLAir	AirLED	olfactoryArena1	Cam1	20220430T003454	6	-0.0115667	-0.00475319	-0.00245782	0.000417003	0.000419524	0.000578641	-0.000125111	-0.000896317	0.000356722	-0.00178734	-0.00431288	-0.00839423	-0.013798	-0.0101858	-0.00929007	-0.0063113	-0.00785692	-0.0113597	-0.0110788	-0.0106245	-0.0123865	-0.0104838	-0.00804686	-0.00660041	-0.00659022	-0.00323291	-0.000155718	0.00320437	0.000633254	0	-0.0037049	-0.00869485	-0.0028654	0.00282123	0.0085561	0.0176117	0.0243037	0.023857	0.0183405	0.0197144	0.0217557
Cos(Upwind)	Empty-split	20xUAS-CsChrimson-mVenus-attP18	6xLED020-10s-NoOdor-0mLAir	AirLED	olfactoryArena1	Cam0	20220413T193122	6	0.0279967	-0.0151939	-0.042053	-0.000236131	0.0216625	0.0715489	0.14959	0.0947752	0.109071	0.16463	0.078443	-0.0102564	-0.0214914	-0.00352316	0.0264068	0.0214513	-0.00929712	-0.037469	-0.0503154	-0.00839828	-0.000849135	-0.0450322	-0.0398747	0.0352616	0.0803531	0.148164	0.10206	0.100668	0.040916	-0.0199627	-0.0463957	0.00403224	-0.041287	-0.0042966	0.121842	0.197305	0.13621	0.113282	0.12149	0.151508	0.139478
Cos(Upwind)	Empty-split	20xUAS-CsChrimson-mVenus-attP18	6xLED020-10s-NoOdor-0mLAir	AirLED	olfactoryArena1	Cam0	20220413T194652	6	-0.10883	-0.0762594	-0.026126	-0.00545266	-0.00235649	-0.021585	-0.0181622	-0.0933694	-0.156133	-0.129025	-0.0660604	-0.0788044	-0.0681823	-0.0700859	-0.100384	-0.101308	-0.09518	-0.0933584	-0.0956702	-0.0978226	-0.0520666	-0.00275443	0.00438825	-0.00790842	-0.0504236	-0.0370587	0.00268386	0.0249482	0.0118175	-0.0308225	-0.123961	-0.130077	-0.100054	-0.0868884	-0.102674	-0.027998	-0.0189001	0.00482402	-0.0126493	0.00177004	0.0256979
Cos(Upwind)	Empty-split	20xUAS-CsChrimson-mVenus-attP18	6xLED020-10s-NoOdor-0mLAir	AirLED	olfactoryArena1	Cam0	20220413T194857	6	-0.0745817	-0.0887312	-0.0810716	-0.0954534	-0.0381933	0.000846447	-0.00923779	-0.052272	-0.0649141	-0.0677637	-0.0723475	-0.0469351	-0.0160388	0.0224611	0.0761555	0.0642899	0.0698351	0.109779	0.113615	0.107055	0.0595052	0.0277268	0.0385481	0.0204732	0.00903523	-0.00496317	-0.0309355	-0.0551648	-0.00101917	-0.0121104	-0.020107	0.0323468	0.0179532	0.0359345	0.0222922	0.0484964	0.0858572	0.0422777	0.0357133	0.0193226	0.029638
Cos(Upwind)	Empty-split	20xUAS-CsChrimson-mVenus-attP18	6xLED020-10s-NoOdor-0mLAir	AirLED	olfactoryArena1	Cam0	20220418T140041	6	-0.250931	-0.166521	-0.121261	-0.101675	-0.0931209	-0.0896606	-0.144008	-0.149603	-0.171203	-0.0608768	-0.0317512	-0.061167	-0.0575921	-0.0247219	-0.0240722	-0.0478527	-0.0573506	-0.0378247	-0.0194309	-0.0192863	0.0223435	-0.00609639	-0.0132055	-0.0244373	-0.0790479	-0.0498948	-0.031409	-0.0260977	-0.00589388	-0.0478	-0.097528	-0.169001	-0.19312	-0.13293	0.0357683	0.0559938	0.06015	0.0379588	0.087876	0.119196	0.110708
Cos(Upwind)	Empty-split	20xUAS-CsChrimson-mVenus-attP18	6xLED020-10s-NoOdor-0mLAir	AirLED	olfactoryArena1	Cam0	20220430T002846	6	-0.0711197	-0.042847	-0.0258085	0.0102233	-0.0169094	-0.0350477	0.00891737	0.0290475	0.040566	0.0471748	0.0661656	0.0762576	0.0949417	0.0994897	0.0856601	0.072173	0.0483798	0.0445456	0.0549699	0.0351007	0.0410921	0.0726506	0.0683631	0.0470876	0.0413778	0.0380454	0.0386671	0.0855943	0.147766	0.1477	0.109831	0.137225	0.164719	0.142339	0.112705	0.17055	0.176308	0.124377	0.130677	0.104083	0.0461685
Cos(Upwind)	Empty-split	20xUAS-CsChrimson-mVenus-attP18	6xLED020-10s-NoOdor-0mLAir	AirLED	olfactoryArena1	Cam0	20220430T003454	6	-0.0677816	0.00249415	0.0354654	0.059373	0.104092	0.0959097	0.0837267	0.0854065	0.108937	0.133321	0.0849317	0.0239522	0.0118735	0.0358882	0.0225563	0.0126388	0.00811379	0.0520396	0.0157315	-0.00354043	0.0437349	0.0456637	0.0718999	0.103924	0.0759556	0.113517	0.118132	0.108225	0.0984696	0.0900695	0.0908514	0.131187	0.0996874	0.103513	0.122943	0.137916	0.13231	0.154066	0.140625	0.14353	0.0965305
Cos(Upwind)	Empty-split	20xUAS-CsChrimson-mVenus-attP18	6xLED020-10s-NoOdor-0mLAir	AirLED	olfactoryArena1	Cam1	20220413T193122	6	-0.111934	-0.130336	-0.122974	-0.129912	-0.115257	-0.1561	-0.203296	-0.161373	-0.158008	-0.120574	-0.133778	-0.163847	-0.103153	-0.0771335	-0.0759135	-0.0457752	-0.108032	-0.150693	-0.142325	-0.182534	-0.186474	-0.179936	-0.193975	-0.225648	-0.254635	-0.213111	-0.198502	-0.229787	-0.198415	-0.17295	-0.0858543	0.0179426	0.045675	0.0979216	0.0586319	-0.009412	-0.0279527	-0.0135472	0.0212344	-0.0586003	-0.0638309
Cos(Upwind)	Empty-split	20xUAS-CsChrimson-mVenus-attP18	6xLED020-10s-NoOdor-0mLAir	AirLED	olfactoryArena1	Cam1	20220413T194652	6	-0.297331	-0.230043	-0.209663	-0.277496	-0.243267	-0.231912	-0.184088	-0.195267	-0.181974	-0.156719	-0.125636	-0.124989	-0.094156	-0.0517491	-0.0388172	-0.0669359	-0.0521524	-0.0751651	-0.11378	-0.158665	-0.147981	-0.163063	-0.185523	-0.0935735	-0.041385	-0.0336858	-0.0254633	-0.0714966	-0.0602065	-0.0309797	-0.0555378	-0.0683227	0.057426	0.137664	0.145225	0.0392016	0.0115435	-0.00742639	-0.0511211	-0.0255557	0.00506136
Cos(Upwind)	Empty-split	20xUAS-CsChrimson-mVenus-attP18	6xLED020-10s-NoOdor-0mLAir	AirLED	olfactoryArena1	Cam1	20220413T194857	6	-0.133634	-0.19922	-0.212249	-0.22482	-0.226659	-0.220724	-0.162235	-0.168418	-0.140766	-0.129152	-0.180733	-0.140963	-0.153357	-0.103161	-0.0183968	0.00231647	-0.0432727	-0.0585601	-0.0831068	-0.0632432	-0.0882614	-0.132683	-0.141534	-0.189438	-0.153021	-0.0494645	0.0138488	0.0504108	0.0593355	0.0248264	0.00254438	0.0436845	-0.00385642	-0.0244092	-0.0295179	-0.00736825	-0.00245054	-0.0442515	-0.0593515	-0.0203389	-0.0213267
Cos(Upwind)	Empty-split	20xUAS-CsChrimson-mVenus-attP18	6xLED020-10s-NoOdor-0mLAir	AirLED	olfactoryArena1	Cam1	20220418T140041	6	-0.076378	-0.0897425	-0.0680948	-0.0605428	-0.0492138	-0.0409714	-0.0594491	-0.0272173	-0.0132073	-0.0254543	-0.0528644	-0.0816052	-0.0778783	-0.0316297	-0.0409429	-0.0686363	-0.119998	-0.12089	-0.121045	-0.134678	-0.169923	-0.195419	-0.14377	-0.0961113	-0.0821268	-0.140798	-0.157639	-0.123257	-0.099658	-0.0832892	-0.0651034	-0.099138	-0.0481875	-0.0187885	0.0508822	0.102655	0.0876513	0.0539566	0.0234045	0.0234753	0.0395984
Cos(Upwind)	Empty-split	20xUAS-CsChrimson-mVenus-attP18	6xLED020-10s-NoOdor-0mLAir	AirLED	olfactoryArena1	Cam1	20220418T142104	6	-0.205501	-0.259898	-0.254533	-0.27536	-0.286439	-0.2913	-0.258829	-0.231298	-0.195787	-0.202327	-0.203812	-0.228909	-0.225143	-0.206851	-0.206752	-0.166209	-0.110397	-0.109042	-0.101033	-0.0916329	-0.0817654	-0.0738631	-0.0854143	-0.114425	-0.125535	-0.10539	-0.106124	-0.107527	-0.10985	-0.136345	-0.0288096	0.139961	0.108182	0.0471923	0.0660356	0.0849298	0.0751086	0.0450282	0.0489965	0.0626326	0.0538429
Cos(Upwind)	Empty-split	20xUAS-CsChrimson-mVenus-attP18	6xLED020-10s-NoOdor-0mLAir	AirLED	olfactoryArena1	Cam1	20220420T171128	6	0.0794112	0.086596	0.0900933	0.119707	0.0764954	0.0554492	0.0444064	0.0397989	-0.0154561	-0.0338701	-0.01948	0.0137127	0.0779543	0.0366935	-0.00304045	0.012899	0.0518039	0.0494248	0.103971	0.139913	0.163966	0.0930074	0.0859287	0.0553351	-0.0167954	0.0325438	0.0418009	0.032843	0.0282374	0.0468729	0.0423556	0.00553772	0.130443	0.143422	0.066719	0.0520029	-0.00227569	0.060726	0.0963396	0.105663	0.0666618
Cos(Upwind)	Empty-split	20xUAS-CsChrimson-mVenus-attP18	6xLED020-10s-NoOdor-0mLAir	AirLED	olfactoryArena1	Cam1	20220430T002846	6	0.0320934	0.013039	0.0130754	0.0501242	0.0211354	-0.0370185	-0.0494475	-0.00528913	-0.0322731	0.0283663	0.0361061	0.00864127	0.00088322	0.0304096	-0.0268951	-0.0668403	-0.0565246	-0.0642723	-0.0832786	-0.102549	-0.0705161	-0.0425387	-0.0936039	-0.116712	-0.0622318	-0.0459344	-0.0174425	0.0176151	-0.0151589	0.0315905	0.0740012	0.0982469	0.0967447	0.0915043	0.0457845	0.0414023	0.0697889	0.0708609	0.0787676	0.0508282	0.0663438
Cos(Upwind)	Empty-split	20xUAS-CsChrimson-mVenus-attP18	6xLED020-10s-NoOdor-0mLAir	AirLED	olfactoryArena1	Cam1	20220430T003454	6	-0.00357235	0.0137952	0.0324856	0.0196546	-0.0221941	-0.0120433	-0.0349592	-0.0337404	0.0152417	-0.018566	-0.0531479	-0.0801017	-0.0764596	-0.0618498	-0.0292034	-0.0367665	-0.0937135	-0.109528	-0.0709577	-0.0430121	-0.044163	-0.0175806	-0.0418312	-0.0262979	-0.0159724	0.00521477	0.00564133	0.00167924	-0.04828	-0.0649408	-0.0578343	0.000216146	0.112321	0.127594	0.158009	0.164059	0.172271	0.138681	0.136119	0.182643	0.186593
DeltaAnglefroPreviousFrame	Empty-split	20xUAS-CsChrimson-mVenus-attP18	6xLED020-10s-NoOdor-0mLAir	AirLED	olfactoryArena1	Cam0	20220413T193122	6	100.518	120.831	112.639	110.429	117.168	106.106	118.256	106.535	123.002	120.522	116.296	102.184	109.407	118.863	125.402	125.01	117.929	109.703	106.92	118.829	102.519	112.199	123.752	110.285	103.272	113.305	108.195	115.901	117.111	91.3378	114.852	228.127	170.736	151.083	133.805	109.107	95.1751	83.5273	88.0163	101.65	91.9672
DeltaAnglefroPreviousFrame	Empty-split	20xUAS-CsChrimson-mVenus-attP18	6xLED020-10s-NoOdor-0mLAir	AirLED	olfactoryArena1	Cam0	20220413T194652	6	106.444	117.242	110.333	112.887	114.997	103.927	108.214	119.304	114.606	116.277	107.523	111.883	103	109.403	101.636	102.502	111.922	90.6158	108.831	122.52	106.324	121.938	107.331	107.263	112.739	110.526	115.469	108.681	112.345	110.55	129.002	187.674	161.808	159.859	169.849	129.099	114.148	112.099	118.986	108.122	110.789
DeltaAnglefroPreviousFrame	Empty-split	20xUAS-CsChrimson-mVenus-attP18	6xLED020-10s-NoOdor-0mLAir	AirLED	olfactoryArena1	Cam0	20220413T194857	6	75.1994	103.938	123.287	120.184	117.458	107.285	107.207	109.661	99.3657	106.579	118.02	117.749	114.015	112.83	112.935	112.881	127.059	121.842	104.079	110.639	108.027	113.748	122.826	112.425	119.135	110.916	114.001	114.24	109.658	106.43	122.01	237.182	202.211	161.668	141.259	118.321	113.95	108.665	100.803	93.5705	88.3954
DeltaAnglefroPreviousFrame	Empty-split	20xUAS-CsChrimson-mVenus-attP18	6xLED020-10s-NoOdor-0mLAir	AirLED	olfactoryArena1	Cam0	20220418T140041	6	91.859	50.4917	54.9973	57.4428	61.6599	51.2333	64.3787	62.7388	63.1781	63.3167	57.6479	56.9181	64.7965	59.2364	53.7628	66.8175	63.3197	70.6374	62.4136	63.1421	63.1976	66.6444	82.9937	71.9804	65.0664	59.5341	55.3312	60.7181	60.5219	62.9312	96.655	200.116	126.54	119.565	124.263	100.41	86.4438	77.4755	78.2281	83.8452	88.8184
DeltaAnglefroPreviousFrame	Empty-split	20xUAS-CsChrimson-mVenus-attP18	6xLED020-10s-NoOdor-0mLAir	AirLED	olfactoryArena1	Cam0	20220430T002846	6	127.913	103.988	108.54	100.082	115.431	103.196	117.344	107.703	103.905	114.073	115.972	100.194	94.4988	89.9392	93.5878	104.066	98.5033	99.2321	115.173	104.216	107.65	104.408	113.348	101.779	107.799	107.833	106.209	110.02	110.409	104.294	112.833	170.983	136.698	130.999	124.971	114.929	108.057	97.3525	98.58	99.675	98.8481
DeltaAnglefroPreviousFrame	Empty-split	20xUAS-CsChrimson-mVenus-attP18	6xLED020-10s-NoOdor-0mLAir	AirLED	olfactoryArena1	Cam0	20220430T003454	6	112.132	82.8023	89.5531	100.907	82.479	97.6508	98.2797	85.9769	95.5435	106.109	94.4866	92.9717	93.5403	89.6201	87.272	93.8733	97.2045	91.3878	88.8872	93.6074	87.1455	93.2351	93.1832	92.0031	94.6377	100.798	90.0325	92.4922	95.6135	83.9684	85.2139	155.359	140.648	131.215	117.243	120.727	111.969	93.8319	101.519	103.938	99.7283
DeltaAnglefroPreviousFrame	Empty-split	20xUAS-CsChrimson-mVenus-attP18	6xLED020-10s-NoOdor-0mLAir	AirLED	olfactoryArena1	Cam1	20220413T193122	6	101.564	106.939	126.089	108.388	105.639	109.368	122.666	110.987	107.635	117.767	123.514	111.169	111.303	116.133	114.555	116.546	116.508	115.453	116.945	109.514	111.188	127.549	125.777	117.688	110.935	105.407	111.501	110.388	103.082	119.716	207.112	170.84	136.962	124.78	118.538	107.564	103.681	111.188	109.68	95.6826	98.5617
DeltaAnglefroPreviousFrame	Empty-split	20xUAS-CsChrimson-mVenus-attP18	6xLED020-10s-NoOdor-0mLAir	AirLED	olfactoryArena1	Cam1	20220413T194652	6	96.0793	91.0505	93.1131	111.01	96.2731	103.398	103.388	87.9569	103.569	102.29	101.324	95.5509	102.544	103.185	91.7272	111.534	100.28	85.6819	85.8587	103.122	100.119	88.4239	97.9242	107.273	97.4468	99.9821	96.6934	102.021	109.397	98.4955	172.215	143.912	140.595	130.777	128.964	117.411	125.09	114.572	116.622	111.338	102.444
DeltaAnglefroPreviousFrame	Empty-split	20xUAS-CsChrimson-mVenus-attP18	6xLED020-10s-NoOdor-0mLAir	AirLED	olfactoryArena1	Cam1	20220413T194857	6	90.4703	118.381	103.215	102.168	112.117	104.225	108.238	117.057	125.681	117.055	127.243	112.46	113.588	113.987	100.549	123.74	120.338	119.172	122.864	113.512	115.831	122.242	108.446	110.426	139.544	111.158	136.484	110.541	123.439	115.074	204.847	169.972	147.254	134.251	103.979	110.838	93.7483	92.5602	88.9688	93.0863	95.9073
DeltaAnglefroPreviousFrame	Empty-split	20xUAS-CsChrimson-mVenus-attP18	6xLED020-10s-NoOdor-0mLAir	AirLED	olfactoryArena1	Cam1	20220418T140041	6	76.2498	63.0068	56.6966	71.6278	84.3793	70.6174	70.0896	79.2767	71.2794	68.4325	65.1332	65.081	59.8085	72.8383	69.9339	69.0192	75.075	62.6197	58.2964	58.3761	67.1055	75.4115	82.6233	78.818	70.5624	62.8812	67.9723	65.606	67.7102	61.4715	234.596	153.589	129.874	156.076	129.745	114.272	92.552	89.3279	79.9299	83.7439	76.2848
DeltaAnglefroPreviousFrame	Empty-split	20xUAS-CsChrimson-mVenus-attP18	6xLED020-10s-NoOdor-0mLAir	AirLED	olfactoryArena1	Cam1	20220418T142104	6	104.053	60.4033	59.576	71.7588	62.1793	64.7779	62.5366	59.2943	64.8399	60.6345	48.6809	53.5562	55.3907	58.5641	60.2871	64.3324	69.6149	65.2507	64.752	55.7954	65.1651	67.6603	66.336	64.5341	62.4646	71.0435	69.5216	73.454	77.8544	75.3548	250.24	182.17	181.408	139.406	139.451	110.064	92.3439	106.804	97.8578	87.4937	84.4541
DeltaAnglefroPreviousFrame	Empty-split	20xUAS-CsChrimson-mVenus-attP18	6xLED020-10s-NoOdor-0mLAir	AirLED	olfactoryArena1	Cam1	20220420T171128	6	96.865	106.387	105.043	100.654	95.1033	108.47	105.558	112.257	98.0219	109.426	119.18	110.433	104.005	99.1022	103.084	109.548	97.4605	105.76	105.484	101.478	107.117	90.3448	91.6189	104.456	99.0949	88.9931	97.0192	99.8692	97.6473	100.985	243.76	197.19	185.052	149.699	130.619	106.568	108.64	122.073	103.523	96.1849	96.8803
DeltaAnglefroPreviousFrame	Empty-split	20xUAS-CsChrimson-mVenus-attP18	6xLED020-10s-NoOdor-0mLAir	AirLED	olfactoryArena1	Cam1	20220430T002846	6	99.1234	118.984	112.395	113.957	107.724	100.409	99.5251	111.532	104.246	111.835	105.342	97.6888	105.677	104.407	109.64	96.1724	94.9173	97.7024	91.4009	88.3896	103.075	103.292	99.1585	100.513	99.3817	87.3624	99.5491	102.776	94.0175	95.937	164.364	135.485	117.88	104.854	105.617	101.945	88.4713	72.4773	67.8434	73.3708	78.5438
DeltaAnglefroPreviousFrame	Empty-split	20xUAS-CsChrimson-mVenus-attP18	6xLED020-10s-NoOdor-0mLAir	AirLED	olfactoryArena1	Cam1	20220430T003454	6	100.107	81.1343	91.4832	97.1809	101.031	95.2221	95.1028	87.9083	92.3457	99.4185	88.8396	104.045	98.437	91.1334	93.8977	93.0777	102.238	93.1293	88.9872	92.6585	88.9692	99.3531	90.8426	86.4846	92.2653	94.5423	92.9917	91.6813	93.5145	104.361	161.435	128.287	124.316	109.195	98.2082	92.071	83.973	93.7677	97.2413	88.3202	104.696
WalkingDistanceFromPreviousFrame	Empty-split	20xUAS-CsChrimson-mVenus-attP18	6xLED020-10s-NoOdor-0mLAir	AirLED	olfactoryArena1	Cam0	20220413T193122	6	2.22442	2.57483	2.74326	2.32519	2.40008	2.6397	2.72469	2.61259	2.52095	2.42308	2.50023	2.33165	2.44096	2.59667	2.54547	2.39983	2.22101	2.76132	2.81558	2.72516	2.48646	2.46127	2.48709	2.54306	2.55186	2.37439	2.35813	2.48981	2.36698	2.37704	2.52152	3.13486	2.68361	2.83458	2.73022	2.72716	2.22305	1.8678	1.98946	2.13133	1.83983
WalkingDistanceFromPreviousFrame	Empty-split	20xUAS-CsChrimson-mVenus-attP18	6xLED020-10s-NoOdor-0mLAir	AirLED	olfactoryArena1	Cam0	20220413T194652	6	1.2933	1.80525	1.52603	1.63786	1.65319	1.56655	1.37764	1.58933	1.61926	1.52279	1.59519	1.64121	1.61496	1.57191	1.52489	1.52261	1.67073	1.67692	1.82493	1.61781	1.66047	1.63157	1.52572	1.38646	1.57938	1.54685	1.57374	1.50056	1.55655	1.46966	1.54465	1.91876	1.64632	1.95962	2.33271	2.06568	2.07613	2.01736	1.96821	1.81726	1.84534
WalkingDistanceFromPreviousFrame	Empty-split	20xUAS-CsChrimson-mVenus-attP18	6xLED020-10s-NoOdor-0mLAir	AirLED	olfactoryArena1	Cam0	20220413T194857	6	2.34862	2.66906	2.57014	2.63545	2.57094	2.61281	2.61172	2.44015	2.39517	2.1194	2.2473	2.4581	2.44618	2.58246	2.39076	2.24086	2.33917	2.35204	2.28972	2.19959	2.1975	2.20634	2.23815	2.06681	2.30755	2.41904	2.41607	2.39579	2.47103	2.45787	2.91651	3.26752	3.02757	3.10857	2.96736	2.87588	2.74157	2.57659	2.20039	2.08683	2.15973
WalkingDistanceFromPreviousFrame	Empty-split	20xUAS-CsChrimson-mVenus-attP18	6xLED020-10s-NoOdor-0mLAir	AirLED	olfactoryArena1	Cam0	20220418T140041	6	0.644698	0.855199	0.908142	0.869593	0.898642	0.891946	1.07237	0.864789	1.13421	1.09367	1.06336	1.12925	1.16413	1.03384	0.99845	1.17084	1.20519	1.14228	1.15561	1.14654	1.12988	1.11597	1.20141	1.08968	1.18173	1.06487	0.966285	0.91087	0.896796	0.975648	1.38173	2.38316	1.71849	1.85179	2.35938	2.03831	1.81778	1.82001	1.78338	1.71255	1.86016
WalkingDistanceFromPreviousFrame	Empty-split	20xUAS-CsChrimson-mVenus-attP18	6xLED020-10s-NoOdor-0mLAir	AirLED	olfactoryArena1	Cam0	20220430T002846	6	1.74249	1.96297	2.05947	1.93334	2.04521	2.09398	2.18256	2.12086	1.95002	1.94391	2.01478	2.05893	1.9773	1.98336	1.98561	2.0459	1.98067	2.1349	2.13739	2.21906	2.2394	2.21525	2.2053	2.11246	2.13292	2.27543	2.33833	2.21758	2.21543	2.05808	2.11665	2.5704	2.10548	2.56848	2.79638	2.58336	2.44202	2.27695	2.24181	2.20473	2.16008
WalkingDistanceFromPreviousFrame	Empty-split	20xUAS-CsChrimson-mVenus-attP18	6xLED020-10s-NoOdor-0mLAir	AirLED	olfactoryArena1	Cam0	20220430T003454	6	1.49215	1.81429	1.83137	1.91374	1.81349	1.78607	1.76557	1.66908	1.7487	1.76285	1.62281	1.56081	1.58288	1.69874	1.77264	1.77293	1.85896	1.89964	1.82899	1.87396	1.88431	1.99907	2.07415	2.01445	2.0719	2.039	1.86379	1.73691	1.72453	1.71804	1.69575	2.27272	2.29091	2.4138	2.48042	2.53482	2.42519	2.20099	2.26449	2.15296	1.98799
WalkingDistanceFromPreviousFrame	Empty-split	20xUAS-CsChrimson-mVenus-attP18	6xLED020-10s-NoOdor-0mLAir	AirLED	olfactoryArena1	Cam1	20220413T193122	6	1.59943	1.63793	1.64756	1.41217	1.50471	1.59799	1.68484	1.7625	1.80153	1.68302	1.81574	1.79903	1.90836	1.89539	1.73982	1.79796	1.81415	1.68131	1.78925	1.64773	1.53675	1.63411	1.84782	1.73279	1.86847	1.92075	1.81936	1.81831	1.89052	2.05533	2.54804	2.17836	2.14809	2.281	2.29808	2.08837	1.83175	1.98245	1.95738	1.48155	1.69879
WalkingDistanceFromPreviousFrame	Empty-split	20xUAS-CsChrimson-mVenus-attP18	6xLED020-10s-NoOdor-0mLAir	AirLED	olfactoryArena1	Cam1	20220413T194652	6	1.15194	1.29365	1.30176	1.30837	1.33175	1.36506	1.41954	1.28193	1.3243	1.23623	1.291	1.2877	1.37321	1.303	1.16524	1.34961	1.23023	1.078	1.13166	1.18153	1.39995	1.27407	1.44372	1.47588	1.35156	1.24944	0.986854	1.08302	1.1933	1.20438	1.77389	1.90992	1.86375	2.01527	1.94209	1.71602	1.77477	1.56489	1.49884	1.61832	1.46523
WalkingDistanceFromPreviousFrame	Empty-split	20xUAS-CsChrimson-mVenus-attP18	6xLED020-10s-NoOdor-0mLAir	AirLED	olfactoryArena1	Cam1	20220413T194857	6	1.66397	1.72969	1.74468	1.68698	1.83603	1.86094	1.92623	2.03208	2.10331	2.03252	2.24482	2.18001	2.13673	2.05718	1.98545	2.16464	2.04581	2.07446	1.91219	1.73394	1.82534	1.88676	1.85518	1.8408	2.0441	2.1684	2.09172	2.07018	1.87474	1.85713	2.54397	2.41291	2.5061	2.47989	2.40488	2.1152	2.01302	1.97552	1.91056	1.89491	1.75618
WalkingDistanceFromPreviousFrame	Empty-split	20xUAS-CsChrimson-mVenus-attP18	6xLED020-10s-NoOdor-0mLAir	AirLED	olfactoryArena1	Cam1	20220418T140041	6	1.21115	1.3273	1.18445	1.17683	1.29456	1.33234	1.30941	1.2973	1.13942	1.30097	1.11441	1.15559	1.13239	1.14898	1.01792	1.02526	1.05021	1.02833	0.96797	0.904282	0.961458	1.05486	1.13896	1.09641	1.17621	1.19971	1.14943	1.09184	1.14021	1.04209	2.94691	1.73029	1.82328	2.19828	1.96036	1.78894	1.69657	1.75096	1.61053	1.67495	1.7523
WalkingDistanceFromPreviousFrame	Empty-split	20xUAS-CsChrimson-mVenus-attP18	6xLED020-10s-NoOdor-0mLAir	AirLED	olfactoryArena1	Cam1	20220418T142104	6	0.842108	0.994447	1.03228	1.16041	0.95298	1.07056	1.0168	1.03107	1.03008	0.997928	0.963971	0.926955	1.01491	1.17651	1.23285	1.21887	1.19991	1.11841	1.16706	1.09905	1.07268	1.27693	1.41664	1.31227	1.24086	1.20296	1.21977	1.23584	1.17183	1.25447	3.26511	1.63721	1.6508	1.85286	1.97484	2.11238	1.96474	1.83873	1.66421	1.82752	1.74472
WalkingDistanceFromPreviousFrame	Empty-split	20xUAS-CsChrimson-mVenus-attP18	6xLED020-10s-NoOdor-0mLAir	AirLED	olfactoryArena1	Cam1	20220420T171128	6	1.97116	2.26025	2.11743	2.10854	1.95885	2.04332	2.13243	2.23561	2.30757	2.22877	2.15893	2.18234	2.10124	2.2336	2.10693	2.14045	2.16984	2.04875	1.96863	2.01198	1.96523	1.75474	1.76328	1.70926	1.82543	1.71751	1.77359	1.83201	1.89546	1.82451	3.18654	2.29147	2.6259	2.92182	2.71553	2.58658	2.56228	2.45559	2.355	2.04786	2.01049
WalkingDistanceFromPreviousFrame	Empty-split	20xUAS-CsChrimson-mVenus-attP18	6xLED020-10s-NoOdor-0mLAir	AirLED	olfactoryArena1	Cam1	20220430T002846	6	2.40419	2.78074	2.80066	2.78266	2.44394	2.27808	2.26842	2.45807	2.39256	2.56666	2.51146	2.61012	2.71132	2.51996	2.46248	2.62788	2.5389	2.67274	2.64541	2.58897	2.66796	2.65461	2.64087	2.686	2.81295	2.96623	2.9849	2.98471	3.11869	2.75503	3.01737	2.45273	2.68081	2.99245	2.72317	2.7549	2.50414	2.21102	2.22926	2.14232	1.9411
WalkingDistanceFromPreviousFrame	Empty-split	20xUAS-CsChrimson-mVenus-attP18	6xLED020-10s-NoOdor-0mLAir	AirLED	olfactoryArena1	Cam1	20220430T003454	6	1.39376	1.58963	1.51177	1.46543	1.61838	1.61998	1.70708	1.56606	1.6578	1.65916	1.50908	1.57345	1.60676	1.49815	1.58696	1.58897	1.55305	1.52069	1.65134	1.62845	1.63568	1.52658	1.56284	1.49477	1.44788	1.51154	1.40121	1.65628	1.51541	1.58105	2.1483	1.9145	2.14015	2.35994	2.49695	2.415	2.34466	2.17367	2.10029	1.95987	2.02149
revisit-10mmOut3mmIn-15s	Empty-split	20xUAS-CsChrimson-mVenus-attP18	6xLED020-10s-NoOdor-0mLAir	AirLED	olfactoryArena1	Cam0	20220413T193122	6	0.132274	0.123721	0.0906944	0.0804015	0.0851687	0.089881	0.0876949	0.0784325	0.0864113	0.0973214	0.116141	0.100887	0.109226	0.105797	0.0940025	0.0753205	0.0774485	0.0767857	0.0776786	0.0974344	0.100609	0.0952368	0.115724	0.136373	0.144155	0.152481	0.1389	0.176773	0.166009	0.137433	0.113649	0.105519	0.079146	0.0796927	0.108246	0.0894347	0.0860785	0.127021	0.115402	0.117361	0.109623
revisit-10mmOut3mmIn-15s	Empty-split	20xUAS-CsChrimson-mVenus-attP18	6xLED020-10s-NoOdor-0mLAir	AirLED	olfactoryArena1	Cam0	20220413T194652	6	0.161766	0.147853	0.140613	0.15221	0.176912	0.167863	0.19453	0.192771	0.170578	0.174053	0.169062	0.123972	0.130132	0.135515	0.144516	0.13233	0.123264	0.106802	0.128379	0.15007	0.144135	0.146763	0.123968	0.132143	0.13874	0.113893	0.120769	0.128523	0.112045	0.108027	0.110069	0.138378	0.153518	0.147995	0.164999	0.133261	0.121259	0.121123	0.0982802	0.114509	0.134668
revisit-10mmOut3mmIn-15s	Empty-split	20xUAS-CsChrimson-mVenus-attP18	6xLED020-10s-NoOdor-0mLAir	AirLED	olfactoryArena1	Cam0	20220413T194857	6	0.0559935	0.0596004	0.0861153	0.110575	0.10581	0.107577	0.0894505	0.0911879	0.0972853	0.102467	0.101422	0.115803	0.0972931	0.0682385	0.0718789	0.0721735	0.0968208	0.113204	0.135657	0.123678	0.156838	0.162052	0.173391	0.137261	0.112539	0.0996856	0.114302	0.11788	0.141765	0.154013	0.12885	0.130999	0.133532	0.109584	0.104499	0.110183	0.115515	0.111914	0.109041	0.107763	0.128915
revisit-10mmOut3mmIn-15s	Empty-split	20xUAS-CsChrimson-mVenus-attP18	6xLED020-10s-NoOdor-0mLAir	AirLED	olfactoryArena1	Cam0	20220418T140041	6	0.0457633	0.0454545	0.0454545	0.0454545	0.0454545	0.0530303	0.0454545	0.0487879	0.077817	0.0727273	0.0683304	0.0772006	0.069697	0.0712121	0.0909091	0.0833333	0.0909091	0.0893939	0.0757576	0.0575758	0.0590909	0.05	0.0378788	0.0575758	0.0681818	0.0666667	0.0575758	0.0606061	0.05	0.0515152	0.0672278	0.0871585	0.0821657	0.0757576	0.0864636	0.0878788	0.103447	0.0927162	0.106061	0.0842949	0.05
revisit-10mmOut3mmIn-15s	Empty-split	20xUAS-CsChrimson-mVenus-attP18	6xLED020-10s-NoOdor-0mLAir	AirLED	olfactoryArena1	Cam0	20220430T002846	6	0.0915333	0.0932531	0.0903509	0.107895	0.114035	0.115864	0.122807	0.130702	0.150877	0.153509	0.153509	0.133333	0.121053	0.127193	0.153509	0.153509	0.161594	0.173684	0.179125	0.185088	0.187905	0.186244	0.192982	0.204525	0.205263	0.20892	0.181806	0.135088	0.12807	0.139474	0.13227	0.0964387	0.0878168	0.070163	0.118211	0.117134	0.107229	0.136897	0.139912	0.145219	0.155387
revisit-10mmOut3mmIn-15s	Empty-split	20xUAS-CsChrimson-mVenus-attP18	6xLED020-10s-NoOdor-0mLAir	AirLED	olfactoryArena1	Cam0	20220430T003454	6	0.141933	0.136349	0.149074	0.142593	0.126852	0.117593	0.128704	0.133333	0.143519	0.141667	0.126852	0.128704	0.124074	0.137037	0.140741	0.160185	0.157407	0.173407	0.17783	0.196296	0.205556	0.211164	0.19136	0.209942	0.184437	0.165494	0.168083	0.168464	0.184423	0.176189	0.174813	0.166694	0.150293	0.125661	0.106415	0.0688917	0.0798822	0.075	0.0985626	0.114468	0.134191
revisit-10mmOut3mmIn-15s	Empty-split	20xUAS-CsChrimson-mVenus-attP18	6xLED020-10s-NoOdor-0mLAir	AirLED	olfactoryArena1	Cam1	20220413T193122	6	0.116909	0.106638	0.113889	0.109259	0.105593	0.111111	0.124074	0.132407	0.149074	0.157407	0.156481	0.125926	0.134259	0.137192	0.122222	0.125	0.129071	0.130556	0.141667	0.144444	0.125	0.125926	0.125926	0.124074	0.142593	0.117593	0.0972222	0.120443	0.120286	0.122222	0.106073	0.100166	0.100926	0.0946048	0.0918218	0.103976	0.107571	0.107571	0.114052	0.128867	0.105597
revisit-10mmOut3mmIn-15s	Empty-split	20xUAS-CsChrimson-mVenus-attP18	6xLED020-10s-NoOdor-0mLAir	AirLED	olfactoryArena1	Cam1	20220413T194652	6	0.0683749	0.0633333	0.0889635	0.0733333	0.0844444	0.106667	0.11	0.112222	0.11	0.116667	0.108889	0.0922222	0.0922222	0.0888889	0.0833333	0.0888889	0.0791126	0.0633333	0.06	0.0722222	0.0577778	0.0633333	0.0777778	0.0744444	0.0822222	0.0777778	0.0777778	0.0733333	0.0655556	0.0655556	0.0666667	0.0845712	0.0900746	0.09	0.11	0.0955556	0.0844444	0.0666667	0.0622222	0.0744444	0.0793046
revisit-10mmOut3mmIn-15s	Empty-split	20xUAS-CsChrimson-mVenus-attP18	6xLED020-10s-NoOdor-0mLAir	AirLED	olfactoryArena1	Cam1	20220413T194857	6	0.0798901	0.0811111	0.0956003	0.1	0.104444	0.1	0.106667	0.102222	0.0855556	0.0811111	0.0966667	0.108031	0.0833333	0.104444	0.122222	0.132424	0.105563	0.106667	0.106667	0.0955556	0.105556	0.106667	0.112476	0.1	0.0688889	0.0811111	0.102282	0.107778	0.101111	0.0888889	0.0848409	0.0823117	0.118889	0.0922222	0.0778523	0.07	0.0712603	0.0733333	0.0582953	0.0580025	0.0655556
revisit-10mmOut3mmIn-15s	Empty-split	20xUAS-CsChrimson-mVenus-attP18	6xLED020-10s-NoOdor-0mLAir	AirLED	olfactoryArena1	Cam1	20220418T140041	6	0.0395159	0.0269231	0.025641	0.025641	0.0395299	0.0574786	0.0426282	0.0549145	0.0549145	0.0672009	0.0779915	0.0779915	0.0741453	0.0651709	0.0574786	0.0698718	0.0835453	0.0974359	0.0910256	0.0835222	0.102564	0.102564	0.0858974	0.0871795	0.0961538	0.0987179	0.110256	0.105128	0.0937885	0.10641	0.0799464	0.075641	0.0628205	0.0621831	0.0620513	0.0488173	0.0653846	0.0782051	0.074359	0.0576923	0.0487179
revisit-10mmOut3mmIn-15s	Empty-split	20xUAS-CsChrimson-mVenus-attP18	6xLED020-10s-NoOdor-0mLAir	AirLED	olfactoryArena1	Cam1	20220418T142104	6	0.0243943	0.0438034	0.063141	0.0902778	0.101496	0.107906	0.0865385	0.0686966	0.0641026	0.0412393	0.0530983	0.0788462	0.0768162	0.0688034	0.058547	0.068687	0.0759615	0.0904915	0.10812	0.0964744	0.0854701	0.0922009	0.0933761	0.0780983	0.0751068	0.0815288	0.086859	0.120299	0.103205	0.0746795	0.0756297	0.0645692	0.0605556	0.0568376	0.0733761	0.0672453	0.0633257	0.0539988	0.0389635	0.043895	0.0651907
revisit-10mmOut3mmIn-15s	Empty-split	20xUAS-CsChrimson-mVenus-attP18	6xLED020-10s-NoOdor-0mLAir	AirLED	olfactoryArena1	Cam1	20220420T171128	6	0.140158	0.11137	0.111922	0.12288	0.130678	0.129487	0.122656	0.155769	0.120525	0.115476	0.125882	0.130952	0.138095	0.138095	0.141667	0.15119	0.141958	0.127656	0.149707	0.160283	0.135714	0.129762	0.155952	0.145238	0.15119	0.141667	0.147619	0.15	0.120238	0.147619	0.119771	0.0952381	0.117857	0.107143	0.120238	0.111905	0.085582	0.0739418	0.0603175	0.0757937	0.077381
revisit-10mmOut3mmIn-15s	Empty-split	20xUAS-CsChrimson-mVenus-attP18	6xLED020-10s-NoOdor-0mLAir	AirLED	olfactoryArena1	Cam1	20220430T002846	6	0.088019	0.0551453	0.0414854	0.0459382	0.0584248	0.0728109	0.0771224	0.0626488	0.0769722	0.0858509	0.0703879	0.0797494	0.0954891	0.101032	0.0670185	0.0517549	0.0546131	0.0725636	0.0951236	0.107703	0.117111	0.110387	0.10984	0.151438	0.200427	0.210596	0.251089	0.271512	0.250414	0.238509	0.250081	0.230523	0.208349	0.179456	0.160269	0.164601	0.1408	0.148235	0.172729	0.130203	0.121087
revisit-10mmOut3mmIn-15s	Empty-split	20xUAS-CsChrimson-mVenus-attP18	6xLED020-10s-NoOdor-0mLAir	AirLED	olfactoryArena1	Cam1	20220430T003454	6	0.160244	0.183704	0.176574	0.168503	0.171639	0.166842	0.174693	0.172193	0.165982	0.166705	0.171162	0.153276	0.140032	0.145352	0.149094	0.137712	0.161101	0.175833	0.184167	0.189167	0.204167	0.2225	0.225833	0.187172	0.1625	0.1475	0.160951	0.152826	0.145359	0.159922	0.148753	0.153501	0.149167	0.130155	0.119399	0.133639	0.14946	0.123624	0.109859	0.128967	0.134715
DeltaDistanceFromCenter	SS33917	20xUAS-CsChrimson-mVenus-attP18	6xLED020-10s-NoOdor-0mLAir	AirLED	olfactoryArena1	Cam0	20220413T202020	6	0.00608382	0.00379909	-0.000526728	-0.00330083	-0.00859642	-0.0125696	-0.0143705	-0.0140331	-0.0122252	-0.00931183	-0.000600644	0.00333116	-0.000443449	-0.00497549	-0.00518763	-0.00507326	-0.00495049	-0.00201903	-0.000350263	-0.00034823	2.3371e-05	0.00405416	0.00636818	0.00566427	0.00597252	0.00870272	0.00695535	0.000851588	-0.000748923	0	-0.00315899	-0.00477968	-0.0125802	-0.0195696	-0.0145283	-0.0091187	-0.00350786	0.00810325	0.0278384	0.0301685	0.0274941
DeltaDistanceFromCenter	SS33917	20xUAS-CsChrimson-mVenus-attP18	6xLED020-10s-NoOdor-0mLAir	AirLED	olfactoryArena1	Cam0	20220418T143543	6	0.0771402	0.0788183	0.0768802	0.069694	0.0607658	0.0496582	0.0394939	0.0309146	0.031516	0.0336299	0.0271709	0.0255789	0.0286482	0.0330502	0.0342244	0.0369717	0.0464939	0.0625773	0.0705271	0.069042	0.0612409	0.0445109	0.0446782	0.0289918	0.00867022	-0.00623267	-0.0101275	-0.00726218	-0.00968984	0	0.0114113	0.0159166	0.00775145	0.0133503	0.0189068	0.0160241	0.0141995	0.0139372	0.0103165	0.0223688	0.0378534
DeltaDistanceFromCenter	SS33917	20xUAS-CsChrimson-mVenus-attP18	6xLED020-10s-NoOdor-0mLAir	AirLED	olfactoryArena1	Cam0	20220418T143647	6	-0.0531365	-0.0436049	-0.0403025	-0.0395962	-0.0368905	-0.030289	-0.0235843	-0.018902	-0.0207621	-0.0260186	-0.0330909	-0.0419927	-0.0493745	-0.0454313	-0.0391235	-0.0362315	-0.026649	-0.0180791	-0.00946648	-0.0139906	-0.0156187	-0.0122864	-0.0141581	-0.0190744	-0.0174248	-0.00493254	-0.00286452	-1.0311e-05	-0.00229584	0	0.00714668	0.00573014	-0.00490803	-0.00605357	0.00316943	0.00252198	0.000703765	0.00143625	0.00201105	-0.00385144	-0.0114221
DeltaDistanceFromCenter	SS33917	20xUAS-CsChrimson-mVenus-attP18	6xLED020-10s-NoOdor-0mLAir	AirLED	olfactoryArena1	Cam0	20220420T173929	6	-0.0150858	-0.000433695	0.0114958	0.0237733	0.0306817	0.0280072	0.0153355	-0.0015088	-0.0228779	-0.0362675	-0.0436226	-0.0487374	-0.0414808	-0.0383015	-0.0355059	-0.028329	-0.0160782	-0.00992247	-0.00815559	-0.00343323	0.000437361	-0.00151836	0.00373618	0.00784709	0.00738974	0.0132198	0.0109587	0.00675416	0.00470808	0	-0.00663733	-0.00529584	-0.0143408	-0.026332	-0.0284097	-0.0310273	-0.0194517	-0.00179391	0.00174172	0.00289648	0.000756146
DeltaDistanceFromCenter	SS33917	20xUAS-CsChrimson-mVenus-attP18	6xLED020-10s-NoOdor-0mLAir	AirLED	olfactoryArena1	Cam0	20220430T004950	6	-0.0132934	-0.0121055	-0.00947621	-0.0046011	0.00519597	0.0150093	0.019054	0.0204798	0.0181735	0.0203422	0.0251076	0.017	0.00790726	0.00705515	0.00300723	-0.00820774	-0.013617	-0.0161078	-0.0159431	-0.0170171	-0.0203784	-0.014956	-0.0119083	-0.0157865	-0.0110458	-0.00408013	-0.00177334	0.00543112	0.00580388	0	0.00479101	0.016164	0.0209794	0.025201	0.0210569	0.0252805	0.0351257	0.0312934	0.0213535	0.00952634	-0.00271677
DeltaDistanceFromCenter	SS33917	20xUAS-CsChrimson-mVenus-attP18	6xLED020-10s-NoOdor-0mLAir	AirLED	olfactoryArena1	Cam0	20220430T005610	6	0.00262833	0.00249064	0.00767038	0.00680434	0.00213508	-0.00461592	-0.00153875	0.00262272	-0.00304244	-0.0149702	-0.020413	-0.0215184	-0.0249164	-0.0229579	-0.0159116	-0.0108361	-0.00865107	-0.00226699	-0.00048212	0.00165381	0.00362852	0.00102105	-0.00186159	-0.00560882	-0.0113557	-0.0157042	-0.0171493	-0.0172534	-0.0123797	0	0.00748821	0.0166559	0.020177	0.00702716	-0.0155836	-0.041638	-0.0527913	-0.0470432	-0.0405157	-0.0139316	0.0088543
DeltaDistanceFromCenter	SS33917	20xUAS-CsChrimson-mVenus-attP18	6xLED020-10s-NoOdor-0mLAir	AirLED	olfactoryArena1	Cam1	20220413T202020	6	0.026812	0.0272613	0.0225092	0.0180905	0.0178795	0.0208568	0.0210675	0.0223825	0.0261786	0.0327751	0.0314138	0.0314075	0.0248422	0.0213953	0.0188976	0.020925	0.0206157	0.0300916	0.0318478	0.036668	0.036063	0.0400475	0.0373728	0.0333985	0.0261477	0.0163958	0.00942483	0.00436235	0.0012485	0	-0.0212597	-0.0277816	-0.0206302	-0.012238	-0.00695726	-0.0076883	-0.0152796	-0.00913706	-0.0191853	-0.0221578	0.000598091
DeltaDistanceFromCenter	SS33917	20xUAS-CsChrimson-mVenus-attP18	6xLED020-10s-NoOdor-0mLAir	AirLED	olfactoryArena1	Cam1	20220418T143543	6	0.0223046	0.0299922	0.0370437	0.0332698	0.025018	0.02421	0.0315039	0.0315592	0.0191091	0.00340134	-0.00780946	-0.015659	-0.0165521	-0.013106	-0.0151488	-0.0158826	-0.0127132	-0.00846041	-0.00465133	0.000514836	0.00396954	0.00846297	0.00810888	0.00728028	0.0138419	0.0164423	0.00969594	0.00588776	0.00244539	0	-0.00521405	-0.00375754	-0.0101425	-0.0221702	-0.0293999	-0.0369944	-0.0433795	-0.0437619	-0.0471807	-0.0527944	-0.0531483
DeltaDistanceFromCenter	SS33917	20xUAS-CsChrimson-mVenus-attP18	6xLED020-10s-NoOdor-0mLAir	AirLED	olfactoryArena1	Cam1	20220418T143647	6	-0.0544631	-0.0574579	-0.0600885	-0.0671615	-0.0776867	-0.0819473	-0.0826232	-0.0841093	-0.0853517	-0.083845	-0.077301	-0.0695104	-0.0617459	-0.0585496	-0.0556863	-0.054692	-0.0505764	-0.046195	-0.0434087	-0.0418784	-0.0425875	-0.0412499	-0.0353961	-0.026969	-0.0240836	-0.0155911	-0.00831717	-0.000726636	-0.00358698	0	0.00522701	0.00714607	0.0152891	0.0278817	0.0329385	0.021163	0.0171746	0.0179754	0.0063687	-0.00252346	-0.00482615
DeltaDistanceFromCenter	SS33917	20xUAS-CsChrimson-mVenus-attP18	6xLED020-10s-NoOdor-0mLAir	AirLED	olfactoryArena1	Cam1	20220420T173929	6	-0.0877071	-0.0777427	-0.0698292	-0.0638684	-0.0545945	-0.0635758	-0.0700897	-0.0642025	-0.0574036	-0.0480657	-0.0338124	-0.0249424	-0.025961	-0.0308675	-0.0311255	-0.0200147	-0.0164326	-0.0240616	-0.0299407	-0.032328	-0.0347685	-0.0403593	-0.0442797	-0.0404289	-0.0312704	-0.0217291	-0.0114078	-0.000902262	0.00154261	0	-0.00410362	-0.00306795	-0.0100293	-0.018401	-0.0340013	-0.0459328	-0.0586563	-0.0617578	-0.0489259	-0.0398504	-0.0375787
DeltaDistanceFromCenter	SS33917	20xUAS-CsChrimson-mVenus-attP18	6xLED020-10s-NoOdor-0mLAir	AirLED	olfactoryArena1	Cam1	20220420T174852	6	0.0167641	0.00835923	0.00515048	0.00640736	0.0137627	0.0190403	0.0358386	0.0410908	0.0352073	0.0299733	0.0217297	0.00887426	-0.00411974	-0.0178139	-0.0316396	-0.0439413	-0.0355224	-0.0143872	0.000450529	0.00591703	-0.00031919	-0.00929915	-0.0191883	-0.0266226	-0.0389501	-0.0365493	-0.0245707	-0.0178146	-0.0116967	0	0.0190553	0.0358058	0.0494582	0.056055	0.0608585	0.0712265	0.0790962	0.0824	0.0777492	0.0719575	0.0549049
DeltaDistanceFromCenter	SS33917	20xUAS-CsChrimson-mVenus-attP18	6xLED020-10s-NoOdor-0mLAir	AirLED	olfactoryArena1	Cam1	20220430T004950	6	0.00366301	0.0113959	0.0122224	0.01569	0.0132039	0.0124365	0.0120619	0.00893823	-0.00200599	-0.0121189	-0.015775	-0.00744686	0.00762011	0.0115187	0.00493478	0.00325782	0.00536204	-0.000725404	-0.0153278	-0.0247016	-0.0185763	-0.00877423	0.0056633	0.0179593	0.0220029	0.0178985	0.0154153	0.0108407	0.00354701	0	-0.00179698	-0.0354478	-0.0920852	-0.106876	-0.0914382	-0.0713346	-0.0310822	0.00897456	0.0226649	0.0204349	0.0275927
DeltaDistanceFromCenter	SS33917	20xUAS-CsChrimson-mVenus-attP18	6xLED020-10s-NoOdor-0mLAir	AirLED	olfactoryArena1	Cam1	20220430T005610	6	-0.0561377	-0.0479713	-0.0463167	-0.0509032	-0.05402	-0.0549516	-0.0587339	-0.0601538	-0.0547498	-0.0522426	-0.0422681	-0.0357934	-0.0303902	-0.0252911	-0.0160373	-0.00729677	-0.00190749	0.000822419	0.00100807	-0.00184384	-0.00760614	-0.00808421	-0.0123299	-0.0129071	-0.0072381	-0.0114941	-0.00283064	0.00833253	0.00503161	0	0.00235153	-0.0172824	-0.0288056	-0.046718	-0.0728975	-0.0929577	-0.116086	-0.115984	-0.126172	-0.142403	-0.15676
Cos(Upwind)	SS33917	20xUAS-CsChrimson-mVenus-attP18	6xLED020-10s-NoOdor-0mLAir	AirLED	olfactoryArena1	Cam0	20220413T202020	6	-0.184055	-0.112716	-0.126553	-0.154886	-0.177178	-0.137325	-0.131837	-0.12253	-0.112744	-0.101678	-0.0831314	-0.0707692	-0.0976118	-0.0907458	-0.0604452	-0.094588	-0.0887538	-0.0687244	-0.0614549	-0.0544924	-0.0426617	-0.0410632	-0.0946045	-0.0621419	-0.0418472	-0.0241257	-0.0660009	-0.073035	-0.0388482	-0.045275	-0.084633	-0.0913202	-0.00973488	0.0701291	0.0804988	0.102963	0.0711711	0.159316	0.164451	0.0922057	0.103713
Cos(Upwind)	SS33917	20xUAS-CsChrimson-mVenus-attP18	6xLED020-10s-NoOdor-0mLAir	AirLED	olfactoryArena1	Cam0	20220418T143543	6	-0.0248669	-0.0498887	-0.0869647	-0.0921167	-0.090106	-0.097133	-0.0897709	-0.0823815	-0.0231285	-0.0365276	-0.0572614	0.00461898	-0.00344123	-0.0373083	-0.0804716	-0.029773	0.0545714	0.114145	0.0778713	0.0374142	-0.0303653	-0.0656793	-0.0750138	-0.151293	-0.182467	-0.16614	-0.0544288	-0.0124703	-0.00482332	0.032698	0.0860022	0.04145	0.0531204	0.142601	0.101674	0.0395601	0.127478	0.0410571	0.0354876	0.138432	0.204837
Cos(Upwind)	SS33917	20xUAS-CsChrimson-mVenus-attP18	6xLED020-10s-NoOdor-0mLAir	AirLED	olfactoryArena1	Cam0	20220418T143647	6	-0.0580542	-0.0273246	-0.0197776	-0.0105992	0.00274802	0.0461004	0.0427825	0.00374256	-0.0139958	-0.0600187	-0.0867016	-0.0875777	-0.0728627	0.00298975	0.0282146	0.0603021	0.114547	0.152818	0.110927	0.0611287	0.0729188	0.011418	0.0285276	-0.00031098	0.021452	0.0636626	0.0321772	0.0208394	-0.00444879	-0.00159973	0.00419204	-0.0555453	-0.0751501	0.0851306	0.123201	0.0382904	0.0576652	0.0975538	0.0708434	0.0323948	0.0407195
Cos(Upwind)	SS33917	20xUAS-CsChrimson-mVenus-attP18	6xLED020-10s-NoOdor-0mLAir	AirLED	olfactoryArena1	Cam0	20220420T173929	6	0.115413	0.19815	0.11691	0.0976564	0.0910385	0.0569399	0.016597	-0.00715579	0.0235375	0.0410945	0.044283	0.0467391	0.070876	0.0456024	0.0435021	0.108547	0.137411	0.101123	0.0846448	0.140281	0.131257	0.101574	0.106699	0.153576	0.117417	0.0818913	0.0246851	0.0140672	0.0857444	0.0612138	0.0722051	0.0603169	0.0571008	0.048925	0.0457989	0.0912947	0.212578	0.241989	0.174031	0.130916	0.129401
Cos(Upwind)	SS33917	20xUAS-CsChrimson-mVenus-attP18	6xLED020-10s-NoOdor-0mLAir	AirLED	olfactoryArena1	Cam0	20220430T004950	6	0.0214999	0.183457	0.191286	0.174768	0.200779	0.153888	0.129708	0.0884391	0.0755747	0.108714	0.0929724	0.0294123	0.118246	0.152453	0.11054	0.0784448	0.0830717	0.0897981	0.0847733	0.124439	0.112913	0.144256	0.100763	0.0977908	0.11242	0.071947	0.0861956	0.113723	0.0917025	0.110333	0.211832	0.184175	0.249848	0.230149	0.212775	0.22115	0.193217	0.101869	0.0696172	0.0767305	0.00616059
Cos(Upwind)	SS33917	20xUAS-CsChrimson-mVenus-attP18	6xLED020-10s-NoOdor-0mLAir	AirLED	olfactoryArena1	Cam0	20220430T005610	6	0.0212345	0.0591671	0.0511354	-0.00817312	0.00426655	0.0471886	0.132382	0.124114	0.0667319	0.0526132	0.0753698	0.0679669	0.073695	0.116069	0.122954	0.081195	0.0667765	0.0931879	0.120004	0.0802962	0.0467889	-0.0117199	-0.00786701	0.0215707	0.0398144	0.0627615	0.0485886	0.0709841	0.121816	0.180249	0.106002	0.110752	0.120975	0.105427	0.0411803	0.0426393	0.126006	0.102671	0.129956	0.159572	0.166495
Cos(Upwind)	SS33917	20xUAS-CsChrimson-mVenus-attP18	6xLED020-10s-NoOdor-0mLAir	AirLED	olfactoryArena1	Cam1	20220413T202020	6	0.0178141	0.00788709	-0.0103828	0.0129334	0.0524787	0.0590394	0.0553596	0.0592549	0.05998	0.0563048	0.0350921	0.00503575	0.0114231	-0.0056803	0.0116496	0.0354417	0.0150492	0.0462626	0.0323583	0.0164525	-0.0085367	-0.0311786	-0.0270081	-0.0637402	-0.0733603	-0.0489009	-0.0237984	-0.00354133	0.00261175	0.0249627	0.0280064	0.0489292	0.178717	0.177096	0.0672081	0.0233327	0.0860226	0.0383205	0.0161521	0.0233829	0.0714734
Cos(Upwind)	SS33917	20xUAS-CsChrimson-mVenus-attP18	6xLED020-10s-NoOdor-0mLAir	AirLED	olfactoryArena1	Cam1	20220418T143543	6	0.100059	0.12305	0.0888717	0.0229394	0.0256078	0.075707	0.0958214	0.0200435	-0.0285648	-0.0281111	-0.0213672	0.00215188	0.0542148	0.0780242	0.0158643	0.0253407	0.0495593	0.0569558	0.0582079	0.0634435	0.0714715	0.0836718	0.0517372	0.0465884	0.117812	0.0976962	0.0680247	0.0765147	0.0263634	0.0334698	0.0861316	0.127191	0.0568853	0.0882022	0.0856957	0.113011	0.119446	0.123096	0.0436813	0.0520108	0.114425
Cos(Upwind)	SS33917	20xUAS-CsChrimson-mVenus-attP18	6xLED020-10s-NoOdor-0mLAir	AirLED	olfactoryArena1	Cam1	20220418T143647	6	-0.231636	-0.164836	-0.146974	-0.184982	-0.186149	-0.156307	-0.168901	-0.221583	-0.247011	-0.197934	-0.17403	-0.149104	-0.120318	-0.134084	-0.132186	-0.117585	-0.0608473	-0.0818816	-0.137053	-0.131157	-0.10755	-0.025709	-0.036624	-0.0503193	-0.0255698	0.00062404	-0.0232764	-0.103206	-0.1275	-0.079106	-0.0126753	0.132456	0.193307	0.192546	0.0491811	-0.0125819	0.0511502	0.0314211	0.00313583	-0.00523253	-0.0255787
Cos(Upwind)	SS33917	20xUAS-CsChrimson-mVenus-attP18	6xLED020-10s-NoOdor-0mLAir	AirLED	olfactoryArena1	Cam1	20220420T173929	6	0.0967399	0.0963056	0.0946899	0.0844068	0.121734	0.0440795	0.0523538	0.128537	0.155424	0.138256	0.194426	0.139911	0.052157	0.029081	0.0744433	0.136429	0.0761891	0.0259972	-0.00121489	0.00667296	0.0349469	0.0257969	0.0637455	0.0857931	0.102582	0.0791127	0.139337	0.10358	0.0259027	-0.0112242	0.0526519	0.138117	0.195815	0.226714	0.151058	0.0682874	0.0971273	0.118067	0.133517	0.109919	0.0375525
Cos(Upwind)	SS33917	20xUAS-CsChrimson-mVenus-attP18	6xLED020-10s-NoOdor-0mLAir	AirLED	olfactoryArena1	Cam1	20220420T174852	6	-0.0570136	-0.0268478	-0.0102307	0.0227975	0.0135795	0.0528236	0.112306	0.0629944	0.0359037	0.010901	-0.0269346	-0.0491877	-0.025173	-0.0158444	-0.00688001	0.0118467	0.0732188	0.122209	0.10978	0.0620965	0.0896819	0.0768347	0.0595572	0.0237352	0.0290053	0.118619	0.135718	0.0948887	0.100366	0.136555	0.113606	0.0863531	0.0824402	0.0388964	0.153015	0.188317	0.108842	0.0645127	-0.00926543	0.0269147	-0.0586087
Cos(Upwind)	SS33917	20xUAS-CsChrimson-mVenus-attP18	6xLED020-10s-NoOdor-0mLAir	AirLED	olfactoryArena1	Cam1	20220430T004950	6	0.0996884	0.0713982	0.0804769	0.0142393	0.0403206	0.0651074	0.0947975	0.102445	0.0739459	0.0502204	0.118328	0.219492	0.194383	0.180269	0.141282	0.121442	0.144629	0.124354	0.101281	0.17754	0.214866	0.208118	0.195847	0.178018	0.143367	0.182997	0.137204	0.10127	0.117349	0.138809	0.0818817	-0.0530876	-0.0248344	0.144014	0.163424	0.232564	0.271688	0.278931	0.205001	0.171929	0.157647
Cos(Upwind)	SS33917	20xUAS-CsChrimson-mVenus-attP18	6xLED020-10s-NoOdor-0mLAir	AirLED	olfactoryArena1	Cam1	20220430T005610	6	-0.101083	-0.0296679	-0.0125628	-0.0440875	-0.0237616	-0.0194199	-0.0293424	0.00837366	0.0248827	-0.0149976	0.020887	-0.000690118	-0.0137539	0.0336396	0.0440831	0.042924	0.0442636	-0.0127296	-0.0531598	-0.0226471	-0.00360649	-0.0156864	-0.0198386	0.0205288	0.0178028	-0.00118114	-0.0174725	-0.0271084	-0.0697775	-0.0680356	-0.097838	-0.00952193	0.0787657	0.123335	0.0867686	0.0324239	0.0715122	0.166974	0.062548	0.0488195	0.0960668
DeltaAnglefroPreviousFrame	SS33917	20xUAS-CsChrimson-mVenus-attP18	6xLED020-10s-NoOdor-0mLAir	AirLED	olfactoryArena1	Cam0	20220413T202020	6	71.7049	52.2165	51.6089	51.8019	57.4115	58.8309	54.0074	58.0179	53.4812	49.8104	58.7785	55.9925	56.5452	62.3275	66.9559	59.2494	54.8111	55.7899	65.0258	55.7745	62.2212	64.2132	62.6942	55.8696	69.1995	68.0547	89.9343	80.199	55.2195	67.6825	51.6802	139.532	169.625	161.611	153.337	170.779	143.896	131.62	146.559	146.118	142.323
DeltaAnglefroPreviousFrame	SS33917	20xUAS-CsChrimson-mVenus-attP18	6xLED020-10s-NoOdor-0mLAir	AirLED	olfactoryArena1	Cam0	20220418T143543	6	71.4509	73.9181	82.5	75.6293	77.0522	69.4219	67.3848	63.2649	61.5465	62.3343	64.5486	70.4996	72.501	61.8862	63.4614	63.9185	69.8775	71.4417	75.3492	75.3225	70.7271	71.9809	70.3019	68.7347	70.1528	72.2216	72.7355	67.3194	77.1489	76.0708	77.9663	217.529	227.927	205.043	179.781	158.175	149.572	152.483	137.639	141.378	132.999
DeltaAnglefroPreviousFrame	SS33917	20xUAS-CsChrimson-mVenus-attP18	6xLED020-10s-NoOdor-0mLAir	AirLED	olfactoryArena1	Cam0	20220418T143647	6	88.8969	69.8631	76.5033	72.3108	63.6298	60.195	73.8164	64.7597	65.9076	64.0293	59.9141	67.816	65.1508	61.9212	71.2212	73.229	67.4753	74.0467	72.633	63.6691	63.438	58.118	67.01	71.9573	58.6011	67.4835	72.9761	68.7632	60.1543	73.6717	64.5288	198.892	222.216	237.576	205.655	177.393	152.015	165.512	145.979	143.92	148.722
DeltaAnglefroPreviousFrame	SS33917	20xUAS-CsChrimson-mVenus-attP18	6xLED020-10s-NoOdor-0mLAir	AirLED	olfactoryArena1	Cam0	20220420T173929	6	88.2779	93.3965	84.1088	90.0442	77.9656	88.9335	87.0051	89.9532	87.1474	90.6284	84.4582	86.494	83.1041	84.6401	76.4991	78.9365	95.1033	87.3815	83.0774	89.0412	91.0272	85.8834	75.3971	78.1682	86.0546	88.7877	82.6595	81.158	88.4619	89.2662	97.1547	162.483	148.137	147.853	127.054	133.212	132.547	146.298	151.87	130.424	156.314
DeltaAnglefroPreviousFrame	SS33917	20xUAS-CsChrimson-mVenus-attP18	6xLED020-10s-NoOdor-0mLAir	AirLED	olfactoryArena1	Cam0	20220430T004950	6	109.652	104.935	106.635	106.795	98.7662	87.5709	87.9406	100.843	92.5619	100.574	99.6775	104.123	101.924	113.522	106.544	116.459	96.2755	111.787	100.315	99.6368	108.462	110.266	106.803	129.089	109	111.779	106.425	106.775	103.135	119.982	118.286	200.762	185.882	159.594	158.657	161.392	141.917	175.664	168.478	145.341	150.214
DeltaAnglefroPreviousFrame	SS33917	20xUAS-CsChrimson-mVenus-attP18	6xLED020-10s-NoOdor-0mLAir	AirLED	olfactoryArena1	Cam0	20220430T005610	6	116.813	119.908	107.12	94.7095	91.3966	101.484	92.4666	103.965	106.633	108.304	100.622	94.4837	87.3077	99.5473	92.8287	103.211	113.609	92.5624	113.521	108.889	88.0931	98.0267	98.9538	93.6679	97.1722	99.9069	96.9237	101.586	104.78	102.287	113.667	154.421	180.852	150.977	154.561	154.185	159.246	154.626	153.769	150.662	155.623
DeltaAnglefroPreviousFrame	SS33917	20xUAS-CsChrimson-mVenus-attP18	6xLED020-10s-NoOdor-0mLAir	AirLED	olfactoryArena1	Cam1	20220413T202020	6	76.2011	74.4256	74.7126	64.8668	71.2062	76.6896	69.2408	65.8647	74.5296	69.6358	74.0739	75.6268	64.5494	67.4172	73.0161	66.5009	66.2124	67.8276	70.5028	60.6927	61.1827	66.2814	60.7448	65.7817	64.5626	77.8745	67.0151	75.8162	76.4377	72.8022	163.833	196.182	158.297	156.16	153.794	171.076	170.137	157.109	164.415	175.737	169.09
DeltaAnglefroPreviousFrame	SS33917	20xUAS-CsChrimson-mVenus-attP18	6xLED020-10s-NoOdor-0mLAir	AirLED	olfactoryArena1	Cam1	20220418T143543	6	73.2911	53.225	63.7145	59.374	63.5691	68.7136	65.6251	72.1954	58.928	62.3347	69.6239	64.0063	71.0418	63.901	68.0566	71.2	60.5769	63.6629	62.8138	62.6956	58.2911	69.3959	63.0446	67.067	72.6181	62.5042	63.6233	64.6435	67.1954	67.63	190.823	176.376	158.181	126.008	114.806	129.34	136.025	121.259	149.233	122.122	141.489
DeltaAnglefroPreviousFrame	SS33917	20xUAS-CsChrimson-mVenus-attP18	6xLED020-10s-NoOdor-0mLAir	AirLED	olfactoryArena1	Cam1	20220418T143647	6	74.3453	67.3633	72.2037	62.301	63.9181	64.0355	63.5871	54.0725	61.3371	71.9289	64.7218	70.355	74.9125	64.8376	63.3308	66.4305	73.0129	73.2077	65.2532	63.3307	78.8115	72.2656	78.3389	79.4822	75.0582	79.9093	82.4292	70.7243	73.9765	73.3036	160.004	206.088	188.753	178.821	168.063	151.409	156.307	170.911	159.05	144.832	155.381
DeltaAnglefroPreviousFrame	SS33917	20xUAS-CsChrimson-mVenus-attP18	6xLED020-10s-NoOdor-0mLAir	AirLED	olfactoryArena1	Cam1	20220420T173929	6	75.3591	87.7879	85.9766	88.3004	100.321	88.4284	110.397	95.4901	77.6965	87.6588	91.9311	94.034	107.372	87.2596	89.3661	92.8085	98.3385	81.6286	90.794	98.8877	88.315	95.9991	88.7846	85.0596	83.1273	84.3386	98.7267	113.266	99.9339	120.579	133.893	130.798	134.584	129.649	130.254	140.612	125.848	165.87	151.957	160.031	140.109
DeltaAnglefroPreviousFrame	SS33917	20xUAS-CsChrimson-mVenus-attP18	6xLED020-10s-NoOdor-0mLAir	AirLED	olfactoryArena1	Cam1	20220420T174852	6	79.7396	87.2892	85.891	84.6545	94.4185	96.6555	86.2222	95.8102	93.7946	84.8533	88.7287	80.8132	71.0891	80.1927	80.0443	85.0601	77.473	81.1874	84.4349	85.9652	98.457	90.5994	85.1052	98.5465	89.6202	86.8165	83.3728	92.3728	83.1523	90.6051	164.901	187.864	161.916	155.177	170.661	140.305	154.984	156.594	160.037	152.656	151.135
DeltaAnglefroPreviousFrame	SS33917	20xUAS-CsChrimson-mVenus-attP18	6xLED020-10s-NoOdor-0mLAir	AirLED	olfactoryArena1	Cam1	20220430T004950	6	78.7974	100.417	108.011	98.9814	96.2888	105.749	102.898	102.965	95.1131	102.043	111.722	102.339	114.784	103.969	99.0915	111.057	98.968	97.6947	99.5778	100.765	87.7272	107.79	101.662	97.5372	105.181	102.944	97.0973	100.679	100.743	105.109	156.378	179.062	130.268	139.221	137.416	148.482	158.084	143.587	172.624	160.466	155.505
DeltaAnglefroPreviousFrame	SS33917	20xUAS-CsChrimson-mVenus-attP18	6xLED020-10s-NoOdor-0mLAir	AirLED	olfactoryArena1	Cam1	20220430T005610	6	88.7242	102.159	100.128	115.984	104.292	93.3587	101.61	108.023	106.029	102.229	102.962	95.217	103.835	115.586	92.2895	90.9707	98.2942	90.3796	92.7724	96.7079	91.2609	90.5669	85.8735	99.6089	94.5585	107.014	105.161	115.127	113.155	114.449	195.357	212.174	191.032	174.547	168.364	153.711	172.701	186.936	191.843	186.083	179.619
WalkingDistanceFromPreviousFrame	SS33917	20xUAS-CsChrimson-mVenus-attP18	6xLED020-10s-NoOdor-0mLAir	AirLED	olfactoryArena1	Cam0	20220413T202020	6	1.42739	1.49536	1.4913	1.62697	1.81438	1.82346	1.6519	1.68703	1.77852	1.77693	1.82725	1.85035	1.71498	1.68094	1.60192	1.68785	1.82568	1.67652	1.72099	1.79725	1.7258	1.5679	1.733	1.54333	1.60994	1.51013	1.55866	1.5616	1.55138	1.46352	1.46945	2.21544	2.40433	2.61241	2.92331	2.81168	3.10674	3.01533	2.83629	2.90572	2.66003
WalkingDistanceFromPreviousFrame	SS33917	20xUAS-CsChrimson-mVenus-attP18	6xLED020-10s-NoOdor-0mLAir	AirLED	olfactoryArena1	Cam0	20220418T143543	6	1.72557	1.85296	2.0931	2.21683	2.09584	2.16864	2.06482	2.15459	1.92942	1.80255	2.33945	2.28848	2.31012	2.41513	2.45445	2.53058	2.39835	2.24681	2.30085	2.10452	2.15351	2.14273	2.12178	2.1646	2.20556	2.35077	2.46204	2.39842	2.46232	2.48375	2.57477	2.829	3.12673	3.81031	4.14093	3.71484	3.61532	3.31603	3.1638	3.32921	3.29199
WalkingDistanceFromPreviousFrame	SS33917	20xUAS-CsChrimson-mVenus-attP18	6xLED020-10s-NoOdor-0mLAir	AirLED	olfactoryArena1	Cam0	20220418T143647	6	1.50783	1.81657	1.86421	1.73136	1.76363	1.76782	1.74485	1.75694	1.84634	1.92652	1.92481	1.89751	1.98321	1.90333	1.94332	1.86918	1.85073	1.79024	1.73614	1.73535	1.82507	1.81777	1.87211	1.90293	1.94715	1.87618	2.04692	1.97563	1.91538	1.78117	1.76144	2.31218	2.27847	2.77192	3.34458	3.53121	3.12608	3.1169	3.11298	3.01755	3.0035
WalkingDistanceFromPreviousFrame	SS33917	20xUAS-CsChrimson-mVenus-attP18	6xLED020-10s-NoOdor-0mLAir	AirLED	olfactoryArena1	Cam0	20220420T173929	6	3.19055	3.5558	3.59244	3.76776	3.74739	3.43647	3.53427	3.85377	4.08423	3.78454	3.87092	3.96928	3.80549	3.38288	3.439	3.5986	3.52889	3.26039	3.12566	3.06703	2.85045	3.06312	2.9387	2.945	2.99661	3.06234	3.07719	3.215	3.16396	3.39071	3.42092	3.97231	4.33398	4.8128	4.90701	4.81779	4.70341	4.15978	4.27389	4.11452	4.00628
WalkingDistanceFromPreviousFrame	SS33917	20xUAS-CsChrimson-mVenus-attP18	6xLED020-10s-NoOdor-0mLAir	AirLED	olfactoryArena1	Cam0	20220430T004950	6	2.02373	2.49265	2.49356	2.53918	2.41169	2.34226	2.22782	2.05845	1.99573	2.22319	2.17694	2.44301	2.46557	2.49138	2.46306	2.53574	2.45877	2.54044	2.4705	2.39213	2.37836	2.59758	2.67429	2.76422	2.77901	2.76752	2.6634	2.73519	2.84871	2.93899	2.85831	3.96469	4.05755	4.48699	4.35599	4.19907	3.87426	3.82958	3.66439	4.04132	4.18123
WalkingDistanceFromPreviousFrame	SS33917	20xUAS-CsChrimson-mVenus-attP18	6xLED020-10s-NoOdor-0mLAir	AirLED	olfactoryArena1	Cam0	20220430T005610	6	2.2659	2.74394	2.62379	2.53826	2.40968	2.59082	2.56235	2.41932	2.411	2.60278	2.78158	2.75805	2.61733	2.6616	2.76089	2.71194	2.66862	2.55202	2.2885	2.4862	2.56398	2.61998	2.63665	2.51503	2.63596	2.85569	2.70863	2.63372	2.66266	2.54998	2.43634	3.19523	3.4044	4.19544	4.65095	4.92708	4.7053	4.28208	4.71221	4.60573	3.97907
WalkingDistanceFromPreviousFrame	SS33917	20xUAS-CsChrimson-mVenus-attP18	6xLED020-10s-NoOdor-0mLAir	AirLED	olfactoryArena1	Cam1	20220413T202020	6	1.68809	1.87157	1.79333	1.96639	2.02334	1.94089	1.96418	1.9042	1.92064	1.78235	1.72597	1.7614	1.77661	1.69535	1.79778	1.82493	1.92387	1.89607	1.80669	1.77934	1.62491	1.53554	1.585	1.62726	1.74766	1.84638	1.81353	1.85017	1.81537	1.78333	2.86612	3.07361	3.11597	3.33492	3.44526	3.25694	3.47762	3.3032	2.95888	2.98816	3.00552
WalkingDistanceFromPreviousFrame	SS33917	20xUAS-CsChrimson-mVenus-attP18	6xLED020-10s-NoOdor-0mLAir	AirLED	olfactoryArena1	Cam1	20220418T143543	6	2.02674	2.17248	2.05874	2.15162	2.22421	2.36305	2.33972	2.37342	2.44319	2.44338	2.58335	2.72111	2.6322	2.40766	2.3429	2.44269	2.61582	2.60621	2.52975	2.45308	2.68553	2.64034	2.80167	2.76191	2.50753	2.22079	2.13913	2.05188	1.99217	1.89083	3.24072	2.9776	3.27662	3.44709	3.54157	3.37017	3.36167	2.91102	3.07139	3.44843	3.76478
WalkingDistanceFromPreviousFrame	SS33917	20xUAS-CsChrimson-mVenus-attP18	6xLED020-10s-NoOdor-0mLAir	AirLED	olfactoryArena1	Cam1	20220418T143647	6	1.31902	1.51719	1.55612	1.79165	1.80295	1.7868	1.76075	1.66187	1.67166	1.8804	1.8137	1.5996	1.81211	1.69076	1.62908	1.76838	1.65352	1.50742	1.61092	1.63817	2.09797	1.93448	1.93282	2.08948	2.20041	2.26187	2.14606	2.07105	2.10088	2.07557	2.79568	2.40832	2.77361	3.16347	3.08467	2.99431	2.84736	3.04532	2.74389	2.69611	2.73773
WalkingDistanceFromPreviousFrame	SS33917	20xUAS-CsChrimson-mVenus-attP18	6xLED020-10s-NoOdor-0mLAir	AirLED	olfactoryArena1	Cam1	20220420T173929	6	2.99298	3.36447	3.15711	3.30346	3.21	3.03083	3.19829	3.09583	3.00318	3.16084	3.01673	3.11875	3.39698	3.9456	4.22363	4.03838	3.74834	3.86778	3.9735	3.96951	4.04606	4.25263	4.30063	4.18279	3.95806	3.76876	3.60759	3.48914	3.4982	3.93055	4.84914	4.39544	5.0142	5.0254	4.52403	4.28686	4.23369	4.26003	4.01016	3.85591	4.10823
WalkingDistanceFromPreviousFrame	SS33917	20xUAS-CsChrimson-mVenus-attP18	6xLED020-10s-NoOdor-0mLAir	AirLED	olfactoryArena1	Cam1	20220420T174852	6	2.72128	3.17983	3.29619	3.4183	3.22368	3.05425	3.17923	2.97052	2.96348	3.09017	3.1193	3.27342	3.32249	3.2159	3.09415	3.17081	3.17191	3.05966	2.95916	3.14168	3.15351	2.9926	3.14493	3.17616	3.30313	3.25931	3.00282	3.19308	3.35977	3.27508	3.93101	3.33242	3.53621	3.84691	3.44561	3.46768	3.34448	3.31378	3.52189	3.51146	3.7538
WalkingDistanceFromPreviousFrame	SS33917	20xUAS-CsChrimson-mVenus-attP18	6xLED020-10s-NoOdor-0mLAir	AirLED	olfactoryArena1	Cam1	20220430T004950	6	2.579	2.96252	2.86627	2.84811	2.82405	2.98325	3.03207	3.14669	3.04906	3.22052	3.15061	2.96889	2.94223	2.99707	3.05926	2.69435	2.76629	2.73676	2.6782	2.61988	2.65456	2.92701	2.99624	2.95176	2.97846	3.06095	3.06005	3.14043	3.13815	3.16558	4.68504	5.49606	6.15775	6.74782	6.45355	5.72708	5.58555	5.16594	4.9028	4.93009	4.70297
WalkingDistanceFromPreviousFrame	SS33917	20xUAS-CsChrimson-mVenus-attP18	6xLED020-10s-NoOdor-0mLAir	AirLED	olfactoryArena1	Cam1	20220430T005610	6	2.1569	2.32965	2.41076	2.51935	2.48819	2.44289	2.64348	2.55677	2.42597	2.38496	2.35232	2.35723	2.41519	2.51193	2.27254	2.12496	2.32717	2.18932	2.09216	2.16257	2.173	2.24871	2.19152	2.16418	2.15086	2.10645	2.24556	2.32579	2.37457	2.15052	3.35419	3.28234	4.25169	4.87694	4.90807	4.77503	4.65491	4.16749	4.21721	4.31203	4.16411
revisit-10mmOut3mmIn-15s	SS33917	20xUAS-CsChrimson-mVenus-attP18	6xLED020-10s-NoOdor-0mLAir	AirLED	olfactoryArena1	Cam0	20220413T202020	6	0.0513688	0.0522592	0.0691667	0.05625	0.0542322	0.0577778	0.0711806	0.0895833	0.0916667	0.105208	0.148655	0.146131	0.121726	0.106548	0.115179	0.11756	0.13044	0.158472	0.195972	0.194911	0.202216	0.193239	0.191221	0.179663	0.182917	0.177569	0.18452	0.212282	0.219772	0.225417	0.240983	0.270095	0.276461	0.258282	0.251357	0.256451	0.242719	0.24267	0.227736	0.20427	0.183194
revisit-10mmOut3mmIn-15s	SS33917	20xUAS-CsChrimson-mVenus-attP18	6xLED020-10s-NoOdor-0mLAir	AirLED	olfactoryArena1	Cam0	20220418T143543	6	0.0855224	0.0941338	0.0940171	0.0811966	0.0811966	0.0798077	0.063141	0.0614316	0.0724359	0.0639957	0.0628205	0.0942308	0.0728632	0.059188	0.0503205	0.0592932	0.0682998	0.0839744	0.0758598	0.0611111	0.123336	0.133081	0.1375	0.141162	0.163407	0.175147	0.189103	0.21387	0.211752	0.218056	0.187957	0.172049	0.191152	0.181896	0.168619	0.194882	0.224444	0.210068	0.192448	0.226486	0.174119
revisit-10mmOut3mmIn-15s	SS33917	20xUAS-CsChrimson-mVenus-attP18	6xLED020-10s-NoOdor-0mLAir	AirLED	olfactoryArena1	Cam0	20220418T143647	6	0.101129	0.0811203	0.0687729	0.0766941	0.114198	0.132143	0.128571	0.122804	0.1337	0.147802	0.139377	0.136776	0.16044	0.177473	0.157075	0.152256	0.177484	0.18004	0.17044	0.187729	0.220501	0.204051	0.199212	0.182601	0.180014	0.162371	0.122894	0.120734	0.122887	0.125465	0.123535	0.117747	0.146589	0.202518	0.173804	0.152564	0.156553	0.165816	0.171132	0.149603	0.110119
revisit-10mmOut3mmIn-15s	SS33917	20xUAS-CsChrimson-mVenus-attP18	6xLED020-10s-NoOdor-0mLAir	AirLED	olfactoryArena1	Cam0	20220420T173929	6	0.0900752	0.103283	0.0900253	0.131313	0.10947	0.107828	0.0958333	0.0916667	0.0959596	0.0814394	0.0794192	0.0691919	0.0857323	0.116162	0.125	0.108207	0.104924	0.0847222	0.100482	0.120581	0.124585	0.104167	0.113889	0.104896	0.108586	0.115152	0.0534398	0.0969697	0.129798	0.164268	0.232148	0.261075	0.308905	0.311974	0.371506	0.289098	0.352146	0.339394	0.240909	0.168004	0.217391
revisit-10mmOut3mmIn-15s	SS33917	20xUAS-CsChrimson-mVenus-attP18	6xLED020-10s-NoOdor-0mLAir	AirLED	olfactoryArena1	Cam0	20220430T004950	6	0.190102	0.184615	0.225962	0.231838	0.25641	0.250855	0.249679	0.256838	0.279915	0.277244	0.274893	0.2375	0.176709	0.166453	0.171261	0.173012	0.19156	0.178312	0.188462	0.203312	0.218269	0.218483	0.202885	0.192228	0.197756	0.184829	0.186538	0.175855	0.177457	0.174372	0.187179	0.232327	0.262286	0.295192	0.303205	0.281692	0.321474	0.301565	0.291132	0.264423	0.254915
revisit-10mmOut3mmIn-15s	SS33917	20xUAS-CsChrimson-mVenus-attP18	6xLED020-10s-NoOdor-0mLAir	AirLED	olfactoryArena1	Cam0	20220430T005610	6	0.19842	0.199412	0.18963	0.18814	0.19277	0.195779	0.20433	0.213208	0.207537	0.170758	0.12547	0.163358	0.160464	0.145949	0.160893	0.118832	0.0960435	0.0992521	0.134273	0.129208	0.130188	0.151576	0.145445	0.151947	0.145956	0.144806	0.155528	0.1487	0.174025	0.203549	0.221523	0.230958	0.260097	0.282825	0.217218	0.238247	0.237121	0.264033	0.217357	0.210472	0.206084
revisit-10mmOut3mmIn-15s	SS33917	20xUAS-CsChrimson-mVenus-attP18	6xLED020-10s-NoOdor-0mLAir	AirLED	olfactoryArena1	Cam1	20220413T202020	6	0.101993	0.101015	0.0858451	0.0929654	0.113018	0.117785	0.122511	0.134569	0.133641	0.138004	0.160784	0.139356	0.154358	0.152381	0.184348	0.187554	0.195185	0.191453	0.191876	0.180958	0.164864	0.17651	0.176342	0.172505	0.17424	0.160951	0.13438	0.146577	0.156566	0.162302	0.177384	0.200033	0.203208	0.211857	0.206489	0.209805	0.205551	0.191744	0.173766	0.172398	0.179157
revisit-10mmOut3mmIn-15s	SS33917	20xUAS-CsChrimson-mVenus-attP18	6xLED020-10s-NoOdor-0mLAir	AirLED	olfactoryArena1	Cam1	20220418T143543	6	0.058886	0.0708333	0.0885417	0.102083	0.096875	0.101042	0.0958333	0.0791667	0.0875	0.0833333	0.0604167	0.0583333	0.0510417	0.05	0.0729167	0.114714	0.113542	0.0979167	0.114583	0.113542	0.123958	0.114583	0.134375	0.161458	0.182292	0.2	0.201232	0.195984	0.203322	0.180208	0.211275	0.219097	0.236181	0.223949	0.223611	0.181944	0.186111	0.221875	0.213681	0.178819	0.168264
revisit-10mmOut3mmIn-15s	SS33917	20xUAS-CsChrimson-mVenus-attP18	6xLED020-10s-NoOdor-0mLAir	AirLED	olfactoryArena1	Cam1	20220418T143647	6	0.0813311	0.0822222	0.0877778	0.0811111	0.0977778	0.1	0.102222	0.0988889	0.0811111	0.0777778	0.0755556	0.0744444	0.0866667	0.0744444	0.0777778	0.0644444	0.0588889	0.0733333	0.0755556	0.0777778	0.0811111	0.0633333	0.0545116	0.0557057	0.0588889	0.0944444	0.117122	0.139459	0.187778	0.2	0.186547	0.225891	0.232829	0.191111	0.183835	0.224921	0.241175	0.182222	0.178889	0.188889	0.172222
revisit-10mmOut3mmIn-15s	SS33917	20xUAS-CsChrimson-mVenus-attP18	6xLED020-10s-NoOdor-0mLAir	AirLED	olfactoryArena1	Cam1	20220420T173929	6	0.105379	0.0821779	0.0986111	0.105556	0.097374	0.101389	0.0708333	0.0638889	0.0833333	0.0666667	0.0638889	0.0513889	0.0527778	0.0583333	0.0555556	0.0916667	0.0875	0.0638889	0.0958333	0.0835728	0.0791667	0.0708333	0.0708333	0.105602	0.123611	0.0958333	0.113889	0.131944	0.194444	0.263889	0.303711	0.35	0.3875	0.353186	0.359722	0.336111	0.352778	0.298611	0.28864	0.29752	0.229778
revisit-10mmOut3mmIn-15s	SS33917	20xUAS-CsChrimson-mVenus-attP18	6xLED020-10s-NoOdor-0mLAir	AirLED	olfactoryArena1	Cam1	20220420T174852	6	0.120601	0.125	0.116667	0.103125	0.075	0.0916667	0.0895833	0.090625	0.102083	0.123958	0.115625	0.116667	0.123958	0.15625	0.158333	0.157292	0.145833	0.132292	0.123958	0.120833	0.122488	0.147733	0.147243	0.180882	0.175674	0.133968	0.153002	0.169608	0.176287	0.182537	0.243738	0.273706	0.301846	0.303931	0.302789	0.304131	0.293951	0.262291	0.245143	0.269624	0.340502
revisit-10mmOut3mmIn-15s	SS33917	20xUAS-CsChrimson-mVenus-attP18	6xLED020-10s-NoOdor-0mLAir	AirLED	olfactoryArena1	Cam1	20220430T004950	6	0.125406	0.124666	0.147399	0.142157	0.140545	0.153764	0.16381	0.164461	0.143706	0.11862	0.0977263	0.101775	0.138617	0.121773	0.128824	0.140182	0.13753	0.155301	0.148901	0.163982	0.167739	0.186663	0.18051	0.177536	0.218294	0.251521	0.253121	0.253791	0.220208	0.23025	0.263931	0.28599	0.251848	0.230764	0.269387	0.236799	0.230092	0.27751	0.195178	0.250252	0.24957
revisit-10mmOut3mmIn-15s	SS33917	20xUAS-CsChrimson-mVenus-attP18	6xLED020-10s-NoOdor-0mLAir	AirLED	olfactoryArena1	Cam1	20220430T005610	6	0.12661	0.154395	0.140168	0.134649	0.134773	0.157954	0.202827	0.213909	0.230558	0.210562	0.20613	0.208133	0.233122	0.197222	0.218736	0.207145	0.216212	0.210317	0.215608	0.175	0.175723	0.216618	0.258869	0.266277	0.267485	0.263146	0.263604	0.255864	0.270018	0.269622	0.250388	0.226212	0.264901	0.249965	0.258984	0.234773	0.247479	0.240786	0.245253	0.205748	0.193135
DeltaDistanceFromCenter	SS33918	20xUAS-CsChrimson-mVenus-attP18	6xLED020-10s-NoOdor-0mLAir	AirLED	olfactoryArena1	Cam0	20220413T203910	6	-0.0291713	-0.0248987	-0.0197014	-0.0103743	0.00665493	0.026306	0.0455806	0.0479554	0.0414991	0.0389271	0.0374665	0.0319659	0.0226567	0.0135799	0.00662574	-0.00847779	-0.0163589	-0.0197006	-0.0232763	-0.021892	-0.0142949	-0.00996388	-0.00884472	-0.00481615	0.00500165	0.00927461	0.00474382	0.00358826	-0.00272262	0	0.0173647	0.0381086	0.0431048	0.0462935	0.0429236	0.0341371	0.0209432	0.0257243	0.0213116	0.0130512	0.00706265
DeltaDistanceFromCenter	SS33918	20xUAS-CsChrimson-mVenus-attP18	6xLED020-10s-NoOdor-0mLAir	AirLED	olfactoryArena1	Cam0	20220418T145440	6	-0.0198907	-0.0208476	-0.0187878	-0.011612	-0.00558254	-0.00234887	0.00189383	0.00339968	0.00721195	0.00762118	0.0049544	0.00519977	0.00617091	0.00349729	0.00101036	-0.00322517	-0.00329906	-0.00190681	-0.00897243	-0.00957769	-0.00605666	-0.00431369	-0.00877764	-0.00865047	-0.00856045	-0.0105663	-0.00644613	0.000209565	0.00385475	0	-0.0058681	-0.0134245	-0.0124435	-0.0146693	-0.0196193	-0.000749874	-0.00370507	-0.00730178	-0.00120111	0.011263	0.0167342
DeltaDistanceFromCenter	SS33918	20xUAS-CsChrimson-mVenus-attP18	6xLED020-10s-NoOdor-0mLAir	AirLED	olfactoryArena1	Cam0	20220418T145534	6	-0.0967049	-0.0980284	-0.102348	-0.11022	-0.108687	-0.109949	-0.107533	-0.104519	-0.0975465	-0.0910869	-0.0825555	-0.0671637	-0.0521781	-0.0355704	-0.026485	-0.0258651	-0.0201844	-0.00857217	0.00345088	0.0108312	0.0193069	0.0238342	0.0213071	0.0165046	0.0186044	0.0126539	0.000463657	-0.00734586	-0.0042353	0	-0.00181967	-0.00536345	-0.00198169	-0.00698557	-0.0124706	-0.00168159	-0.00174119	0.00375335	0.0103368	0.00886614	0.00840734
DeltaDistanceFromCenter	SS33918	20xUAS-CsChrimson-mVenus-attP18	6xLED020-10s-NoOdor-0mLAir	AirLED	olfactoryArena1	Cam0	20220420T180332	6	-0.0589297	-0.0633323	-0.0651217	-0.0656057	-0.0642362	-0.0688086	-0.0750347	-0.0888636	-0.0947614	-0.0930757	-0.0849672	-0.0785111	-0.0733234	-0.0692957	-0.0745985	-0.0736034	-0.0661623	-0.0657562	-0.0684536	-0.0747912	-0.0758185	-0.0790524	-0.0789495	-0.0762532	-0.0793434	-0.0692919	-0.0498714	-0.0327194	-0.0148259	0	0.00788713	0.0216529	0.0237234	0.0281687	0.0317991	0.0418983	0.0520461	0.0606575	0.0615127	0.0589258	0.048251
DeltaDistanceFromCenter	SS33918	20xUAS-CsChrimson-mVenus-attP18	6xLED020-10s-NoOdor-0mLAir	AirLED	olfactoryArena1	Cam0	20220420T180945	6	0.0724914	0.087271	0.105286	0.129223	0.129207	0.109933	0.0961166	0.087137	0.0846284	0.076597	0.0765501	0.0641877	0.0462254	0.0341608	0.0186974	0.026973	0.0215766	0.0258983	0.0324104	0.0226262	0.0196209	0.0178598	0.018496	0.0152023	0.00449804	-0.000931528	0.00770834	0.0130939	0.0104299	0	0.00866167	0.00955394	0.00686989	-0.0095048	-0.0249541	-0.0270967	-0.0280904	-0.0168891	-0.0271769	-0.0587269	-0.0573238
DeltaDistanceFromCenter	SS33918	20xUAS-CsChrimson-mVenus-attP18	6xLED020-10s-NoOdor-0mLAir	AirLED	olfactoryArena1	Cam0	20220420T183207	6	-0.0579301	-0.0508234	-0.0426882	-0.0394846	-0.0379291	-0.032693	-0.0285486	-0.0218786	-0.0175768	-0.00266552	0.00715788	0.013159	0.00896267	0.00518868	0.00362211	0.00116707	0.000540438	0.00328291	0.00596101	0.00448597	0.00268766	-0.00104777	0.00124089	0.000183065	0.000185164	0.00638075	0.00625377	0.00732169	0.00707779	0	-0.00364334	-0.00442946	-0.00193903	-0.000616524	0.00230408	0.00815589	0.0103096	0.00687112	0.00451802	0.00311434	-0.0066919
DeltaDistanceFromCenter	SS33918	20xUAS-CsChrimson-mVenus-attP18	6xLED020-10s-NoOdor-0mLAir	AirLED	olfactoryArena1	Cam0	20220430T010342	6	-0.0374072	-0.040119	-0.0472951	-0.0479606	-0.044522	-0.0426418	-0.0434842	-0.0414547	-0.0358101	-0.0274974	-0.0185051	-0.0129195	-0.00750179	-0.00324053	0.000147885	0.00278338	0.00454638	0.00412911	0.00438532	-0.0023765	-0.0138586	-0.021863	-0.022733	-0.0191061	-0.0181248	-0.0199472	-0.0149577	-0.00978742	-0.0059471	0	0.00389966	0.0049287	0.00209801	0.00633896	0.000451293	-0.00485015	-0.00764882	-0.00139539	-0.00466724	-0.00315035	0.0041159
DeltaDistanceFromCenter	SS33918	20xUAS-CsChrimson-mVenus-attP18	6xLED020-10s-NoOdor-0mLAir	AirLED	olfactoryArena1	Cam0	20220430T011156	6	-0.0121232	-0.00945867	-0.00301207	0.000405089	0.00535955	0.0113017	0.0158521	0.0150789	0.0117594	0.00520636	0.00119555	-0.00208629	-0.00585605	-0.00742677	-0.0115298	-0.0169677	-0.0218718	-0.0194603	-0.0189545	-0.0200855	-0.0220387	-0.0223685	-0.0183008	-0.0135072	-0.00722515	0.00134088	0.00428961	0.00346511	0.0013843	0	7.982e-06	-0.0011861	-0.00281451	-0.010895	-0.0185284	-0.030016	-0.0297662	-0.0172665	-0.00807498	-0.00512336	-0.00190774
DeltaDistanceFromCenter	SS33918	20xUAS-CsChrimson-mVenus-attP18	6xLED020-10s-NoOdor-0mLAir	AirLED	olfactoryArena1	Cam1	20220413T202503	6	0.0420966	0.034646	0.0218843	0.0118829	0.00916813	0.0162006	0.0211652	0.0196958	0.0152197	0.0128742	0.0118243	0.00734283	0.00259122	0.0013383	-0.0096092	-0.01896	-0.0230195	-0.0296642	-0.0359419	-0.0324649	-0.0243198	-0.0182492	-0.0136436	-0.00192841	0.00765468	0.00729813	0.00691075	0.00472871	0.00217956	0	-0.00250268	-0.00927826	-0.0220263	-0.0218072	-0.0173054	-0.017987	-0.0173112	-0.00702138	0.00143335	0.0144333	0.0289576
DeltaDistanceFromCenter	SS33918	20xUAS-CsChrimson-mVenus-attP18	6xLED020-10s-NoOdor-0mLAir	AirLED	olfactoryArena1	Cam1	20220413T203910	6	0.00395648	0.0105772	0.0144523	0.00983931	-0.00468231	-0.00545502	-0.00461748	-0.00706972	-0.00653746	0.000347221	0.0114877	0.0149069	0.0143654	0.00409113	-0.00182572	0.00221866	-0.00653588	-0.0246644	-0.0265558	-0.0208232	-0.026177	-0.0281623	-0.0249928	-0.0206296	-0.0112347	-0.00521824	-0.00493911	-0.00781127	-0.00250465	0	-0.0307688	-0.0330663	-0.0374552	-0.0443069	-0.0418466	-0.028591	-0.0222124	-0.0320438	-0.0416269	-0.0554267	-0.0450177
DeltaDistanceFromCenter	SS33918	20xUAS-CsChrimson-mVenus-attP18	6xLED020-10s-NoOdor-0mLAir	AirLED	olfactoryArena1	Cam1	20220418T145440	6	0.0615682	0.067099	0.0704692	0.0620912	0.0499847	0.0498705	0.0438972	0.0346696	0.030626	0.0312419	0.029231	0.023642	0.0222656	0.0242049	0.028702	0.0335735	0.0356299	0.0263443	0.0197053	0.012793	0.00639387	-0.00191273	-0.0110033	-0.0192107	-0.0222104	-0.0282937	-0.0290606	-0.0214422	-0.0119086	0	-0.00249679	-0.00530359	-0.0063367	-0.00801706	-0.013746	-0.0097235	-0.0034327	0.00346342	0.00330986	0.00440118	0.00854079
DeltaDistanceFromCenter	SS33918	20xUAS-CsChrimson-mVenus-attP18	6xLED020-10s-NoOdor-0mLAir	AirLED	olfactoryArena1	Cam1	20220418T145534	6	-0.0143792	-0.0114317	-0.0106454	-0.0123218	-0.0140334	-0.00854362	-0.00835427	-0.0153941	-0.0168458	-0.0217277	-0.025783	-0.0248862	-0.0269471	-0.0310575	-0.0274143	-0.0224961	-0.0207781	-0.0122648	-0.00555827	-0.0005282	0.00280614	0.0049775	0.0108688	0.010227	0.00432803	0.0023741	0.00155681	0.00260857	0.00260027	0	-0.000588801	-0.00941112	-0.00781353	-0.00402303	0.00305614	0.00303436	-0.00390954	-0.0128377	-0.0102627	-0.00404582	-0.00645067
DeltaDistanceFromCenter	SS33918	20xUAS-CsChrimson-mVenus-attP18	6xLED020-10s-NoOdor-0mLAir	AirLED	olfactoryArena1	Cam1	20220420T180332	6	-0.103964	-0.0811949	-0.0611248	-0.0400315	-0.0239395	-0.0128232	-0.000431993	0.00366842	0.00683044	0.00286825	0.00125876	0.00199932	0.00693334	0.00960766	0.00787979	0.00454479	-0.00350898	-0.0159346	-0.0230729	-0.0224692	-0.0183923	-0.0112776	-0.00175132	0.00498399	0.00594874	0.00502221	0.0121538	0.0161277	0.0076379	0	-0.00227657	-0.0105476	-0.0242524	-0.0295015	-0.0326804	-0.0448537	-0.0577849	-0.064397	-0.0525531	-0.0309527	-0.0141766
DeltaDistanceFromCenter	SS33918	20xUAS-CsChrimson-mVenus-attP18	6xLED020-10s-NoOdor-0mLAir	AirLED	olfactoryArena1	Cam1	20220420T183207	6	-0.0104251	-0.00159078	0.00323497	0.0110114	0.0184673	0.0271458	0.0341107	0.031753	0.0298302	0.0271261	0.031268	0.0322849	0.0347808	0.0348309	0.0364054	0.0333763	0.0317147	0.0328926	0.0382435	0.0415119	0.0381232	0.0373212	0.0393645	0.0304416	0.0156634	0.000981917	-0.0098209	-0.00963103	-0.00915241	0	-0.00362192	-0.0074897	-0.00474837	0.00112396	0.00299975	0.000352312	-0.00564643	-0.0168221	-0.0225726	-0.0296713	-0.0375118
DeltaDistanceFromCenter	SS33918	20xUAS-CsChrimson-mVenus-attP18	6xLED020-10s-NoOdor-0mLAir	AirLED	olfactoryArena1	Cam1	20220430T010342	6	-0.0603577	-0.0562109	-0.0617741	-0.0594752	-0.0621855	-0.061047	-0.0542461	-0.064568	-0.0704928	-0.075668	-0.0793763	-0.0779066	-0.0638489	-0.0515137	-0.0448153	-0.0311995	-0.0243134	-0.0231075	-0.0204345	-0.0161875	-0.0128494	-0.0158688	-0.0206123	-0.0204585	-0.0231873	-0.0139632	-0.00531993	-0.00534939	-0.00683592	0	0.012775	0.00726514	-0.00105528	-0.0165606	-0.028812	-0.0261939	-0.0139002	-0.00468923	0.0182585	0.040519	0.0553218
DeltaDistanceFromCenter	SS33918	20xUAS-CsChrimson-mVenus-attP18	6xLED020-10s-NoOdor-0mLAir	AirLED	olfactoryArena1	Cam1	20220430T011156	6	-0.0194692	-0.0155584	-0.0165917	-0.0138911	-0.0168069	-0.0188932	-0.0215852	-0.0263437	-0.0273122	-0.0317595	-0.0337024	-0.0344047	-0.0316357	-0.0321596	-0.0285351	-0.025378	-0.0197591	-0.0130145	-0.0100774	-0.015497	-0.0224465	-0.0284575	-0.0280916	-0.0230017	-0.0194195	-0.014943	-0.0107238	-0.00675885	-0.00500394	0	-0.00677209	-0.0153274	-0.0177919	-0.0179624	-0.015936	-0.0202609	-0.0300578	-0.0403847	-0.0449198	-0.0422278	-0.0416427
DeltaDistanceFromCenter	SS33918	20xUAS-CsChrimson-mVenus-attP18	6xLED020-10s-NoOdor-0mLAir	AirLED	olfactoryArena1	Cam0	20220413T202503	5	0.0190939	0.0130681	-0.00303636	-0.0141126	-0.0236403	-0.0169116	-0.0247283	-0.0130131	-0.00175465	0.00378914	0.00308196	0.0219588	0.0123683	-0.0085139	-0.00831249	-0.00354239	0.00985684	0.0224457	0.0322234	0.0272662	0.0251556	0.0258489	0.0269483	0.0296631	0.0289922	0.0189956	0.0119333	0.00692953	-0.00143016	0	0.0087705	0.0153922	0.0154989	0.00551758	0.00871228	0.0181929	0.0232231	0.0182046	0.0276918	0.0243269	0.0168445
Cos(Upwind)	SS33918	20xUAS-CsChrimson-mVenus-attP18	6xLED020-10s-NoOdor-0mLAir	AirLED	olfactoryArena1	Cam0	20220413T203910	6	-0.00235438	-0.0251897	-0.0042223	0.0550533	0.119744	0.135763	0.13939	0.0576158	0.0123074	0.0371482	0.0328193	-0.0368225	-0.104925	-0.0784554	-0.0780285	-0.16517	-0.175775	-0.151608	-0.115006	-0.0400647	0.0157074	0.0326518	0.0314922	0.0756938	0.0742004	0.0545078	0.0288589	0.0262557	0.0246052	0.0503719	0.102339	0.154469	0.0830132	0.179143	0.107675	0.0931992	0.020881	0.189241	0.04166	0.100958	0.130572
Cos(Upwind)	SS33918	20xUAS-CsChrimson-mVenus-attP18	6xLED020-10s-NoOdor-0mLAir	AirLED	olfactoryArena1	Cam0	20220418T145440	6	-0.107333	-0.04893	-0.0131222	0.0394032	-0.0283833	-0.00929157	0.0363133	0.0609157	0.0833493	0.0297367	0.0192485	0.000300727	0.00471046	-0.0712035	-0.0970334	-0.0735444	-0.0464917	-0.0698607	-0.0497581	-0.0190323	-0.021377	-0.0387128	-0.0586671	-0.143092	-0.1179	-0.114875	-0.0827724	-0.0293669	-0.0741317	-0.15968	-0.14952	-0.108718	0.0261133	0.069602	0.0354163	0.125064	0.0600933	0.129437	0.182224	0.189914	0.104294
Cos(Upwind)	SS33918	20xUAS-CsChrimson-mVenus-attP18	6xLED020-10s-NoOdor-0mLAir	AirLED	olfactoryArena1	Cam0	20220418T145534	6	-0.144792	-0.151525	-0.149535	-0.1749	-0.187414	-0.17397	-0.113575	-0.0551429	-0.0510543	-0.0405513	-0.0313929	0.00235174	0.027317	0.0703545	-0.00272176	-0.041096	-0.0537722	0.020174	0.0843771	0.0449978	0.0339862	0.0426859	0.00175019	-0.0366277	0.00891678	-0.0800059	-0.155612	-0.117111	-0.0631295	-0.0346503	-0.0539498	-0.0914512	0.0645461	0.173509	0.140944	0.130167	0.125056	0.165076	0.131394	0.10938	0.0843329
Cos(Upwind)	SS33918	20xUAS-CsChrimson-mVenus-attP18	6xLED020-10s-NoOdor-0mLAir	AirLED	olfactoryArena1	Cam0	20220420T180332	6	-0.161827	-0.127768	-0.109732	-0.124339	-0.136421	-0.138388	-0.123472	-0.108558	-0.0914801	-0.0655767	-0.0520083	-0.0837515	-0.0291622	-0.0408258	-0.0673526	-0.0538529	-0.0599404	-0.114686	-0.129265	-0.119455	-0.106278	-0.0948874	-0.0479111	-0.0110694	0.00824027	0.0477877	0.0987945	0.123115	0.124989	0.0920049	0.0439487	0.0536118	0.161619	0.202184	0.260085	0.221339	0.23512	0.21736	0.2026	0.111577	0.0629943
Cos(Upwind)	SS33918	20xUAS-CsChrimson-mVenus-attP18	6xLED020-10s-NoOdor-0mLAir	AirLED	olfactoryArena1	Cam0	20220420T180945	6	0.0637461	0.178779	0.146687	0.170235	0.0386194	0.0373422	0.0423454	0.114859	0.0859382	0.0765508	0.0819226	0.0682405	0.0560122	0.0462674	0.012063	0.0249527	0.0525933	0.0392798	-0.0380023	-0.0779575	-0.113742	-0.0264904	0.0758552	-0.00590242	-0.0615255	-0.0432683	0.0318657	0.0733485	0.050046	0.08225	0.0774517	0.0205786	-0.0657904	0.0117521	0.0119854	0.266344	0.21282	0.173106	0.0940669	0.088633	0.108382
Cos(Upwind)	SS33918	20xUAS-CsChrimson-mVenus-attP18	6xLED020-10s-NoOdor-0mLAir	AirLED	olfactoryArena1	Cam0	20220420T183207	6	-0.0741951	-0.0244305	-0.0280808	-0.0540658	-0.0636791	-0.0261431	-0.0507328	-0.0816302	-0.0801314	0.0185894	0.0849155	0.0155622	-0.0134914	-0.0247335	-0.0219023	-0.0601969	-0.0119299	0.00771944	-0.0174668	-0.048896	-0.0565485	-0.049016	0.00386696	-0.0328755	-0.0104116	-0.0205514	-0.0283835	-0.0356203	-0.0591896	-0.0406912	-0.0117753	0.092234	0.0673928	0.119492	0.126605	0.213615	0.234475	0.159232	0.138064	0.0873809	0.0363473
Cos(Upwind)	SS33918	20xUAS-CsChrimson-mVenus-attP18	6xLED020-10s-NoOdor-0mLAir	AirLED	olfactoryArena1	Cam0	20220430T010342	6	-0.130873	-0.0735282	-0.0546675	0.000235374	0.033348	0.00788788	0.037337	0.0737022	0.104751	0.133063	0.123035	0.120893	0.103887	0.0926772	0.075928	0.0449133	0.021079	0.0370243	0.0579618	0.0282938	0.0211063	0.023015	0.0933616	0.117777	0.11874	0.117289	0.0927726	0.0848372	0.0764765	0.0689131	0.0456081	0.0865517	0.111408	0.156554	0.133665	0.16021	0.164741	0.138943	0.059593	0.111949	0.125707
Cos(Upwind)	SS33918	20xUAS-CsChrimson-mVenus-attP18	6xLED020-10s-NoOdor-0mLAir	AirLED	olfactoryArena1	Cam0	20220430T011156	6	0.0308559	0.0886029	0.117525	0.114498	0.139008	0.162621	0.19233	0.17332	0.1361	0.129739	0.127609	0.126234	0.099179	0.0820683	0.0645237	0.0506741	0.0711906	0.133488	0.124508	0.138512	0.131475	0.113205	0.14458	0.143901	0.140377	0.128656	0.0879922	0.100709	0.0740049	0.105901	0.0950626	0.0983732	0.154487	0.205052	0.228386	0.177828	0.179561	0.191895	0.105503	0.0935971	0.128009
Cos(Upwind)	SS33918	20xUAS-CsChrimson-mVenus-attP18	6xLED020-10s-NoOdor-0mLAir	AirLED	olfactoryArena1	Cam1	20220413T202503	6	-0.0785497	-0.13755	-0.165963	-0.133835	-0.0801291	-0.0832403	-0.131899	-0.110469	-0.121136	-0.1228	-0.107905	-0.100473	-0.0438782	-0.0178161	-0.0522392	-0.0856557	-0.051709	-0.00510668	0.035095	0.0785481	0.0466994	0.0409011	0.0266824	0.0791534	0.0716559	0.0349992	-0.016084	-0.0124816	-0.0232439	-0.0448875	-0.0421997	-0.0144573	0.0771203	0.16785	0.103421	0.0987722	0.155584	0.157259	0.209402	0.238744	0.186335
Cos(Upwind)	SS33918	20xUAS-CsChrimson-mVenus-attP18	6xLED020-10s-NoOdor-0mLAir	AirLED	olfactoryArena1	Cam1	20220413T203910	6	0.0157828	0.0598867	0.00909923	-0.0458727	-0.0321025	0.0247778	0.0446431	0.0207778	0.0774317	0.0786412	0.106504	0.07836	0.0911829	0.0959979	0.0155589	0.00469205	-0.0560479	-0.0172057	0.0319015	0.0456752	0.00787248	0.00687708	0.00473157	0.0764575	0.105746	0.0731078	0.0105111	-0.00636725	0.0484719	0.0748172	0.081311	0.104232	0.106016	0.160631	0.171712	0.218858	0.170041	0.092812	0.112252	0.127847	0.111142
Cos(Upwind)	SS33918	20xUAS-CsChrimson-mVenus-attP18	6xLED020-10s-NoOdor-0mLAir	AirLED	olfactoryArena1	Cam1	20220418T145440	6	0.0444729	0.117816	0.074326	0.0376122	0.0297946	0.0150976	-0.0269172	-0.0704911	-0.0422071	-0.0260035	-0.0553434	-0.0578405	-0.0258244	-0.00222638	0.00356739	0.0140129	0.0170099	-0.0491744	-0.0615602	-0.0351549	-0.00433448	-0.00469939	0.00112084	0.0194426	-0.00981895	-0.0910592	-0.0877704	-0.00923537	-0.0151756	-0.0266931	-0.113295	-0.0232747	0.0722716	0.021673	0.0563538	0.186383	0.238041	0.251233	0.154644	0.20908	0.205797
Cos(Upwind)	SS33918	20xUAS-CsChrimson-mVenus-attP18	6xLED020-10s-NoOdor-0mLAir	AirLED	olfactoryArena1	Cam1	20220418T145534	6	-0.065367	-0.029947	-0.0176213	-0.0487667	-0.00589886	0.0234286	-0.0529188	-0.0902913	-0.0683937	-0.107743	-0.10013	-0.0753498	-0.0964087	-0.085178	-0.0741449	-0.0827537	-0.0736798	-0.0274404	-0.0559644	-0.0145827	-0.00035438	-0.019661	-0.0111367	-0.0412785	-0.0303102	-0.00119311	0.0333621	0.0268237	-0.0316692	-0.0624975	-0.0947083	-0.0736616	0.0398029	0.0954266	0.116433	0.03509	0.00805776	0.0417358	0.086126	0.0862728	0.0581232
Cos(Upwind)	SS33918	20xUAS-CsChrimson-mVenus-attP18	6xLED020-10s-NoOdor-0mLAir	AirLED	olfactoryArena1	Cam1	20220420T180332	6	0.182336	0.205282	0.214012	0.18463	0.138609	0.125226	0.146501	0.140013	0.135386	0.128385	0.152059	0.14517	0.15233	0.170489	0.138865	0.149619	0.122123	0.102384	0.099084	0.142907	0.126218	0.110711	0.124442	0.0827571	-0.00169178	0.0105327	0.0597778	0.0270082	-0.0330996	-0.0123935	0.0226019	0.0340356	-0.0188174	0.100137	0.10727	-0.00970097	-0.0336205	-0.00561141	0.0343938	0.138881	0.133741
Cos(Upwind)	SS33918	20xUAS-CsChrimson-mVenus-attP18	6xLED020-10s-NoOdor-0mLAir	AirLED	olfactoryArena1	Cam1	20220420T183207	6	0.106088	0.19971	0.198662	0.217832	0.223439	0.19886	0.159447	0.132293	0.140757	0.0930311	0.0790831	0.12324	0.148673	0.166681	0.156186	0.14279	0.11484	0.122462	0.170842	0.109543	0.0605018	0.0977264	0.0614654	0.0435766	0.0488292	0.018814	0.0543183	0.100528	0.0865776	0.104216	0.107167	0.176616	0.164636	0.12352	0.0662783	0.100779	0.0968731	0.0663008	0.032101	-0.0184411	0.0403576
Cos(Upwind)	SS33918	20xUAS-CsChrimson-mVenus-attP18	6xLED020-10s-NoOdor-0mLAir	AirLED	olfactoryArena1	Cam1	20220430T010342	6	0.0152345	0.0635741	0.0259168	0.00899657	0.044001	0.0171335	0.0266759	0.0215806	0.0265377	0.0489239	0.075761	0.0798169	0.0814194	0.112383	0.144461	0.139224	0.153646	0.13706	0.116429	0.124916	0.117596	0.0919945	0.13149	0.134279	0.103642	0.107431	0.109823	0.0856044	0.0787962	0.0812311	0.0427689	0.0556814	0.0156532	-0.00791667	0.00549576	0.0835142	0.142682	0.187499	0.218888	0.241767	0.165405
Cos(Upwind)	SS33918	20xUAS-CsChrimson-mVenus-attP18	6xLED020-10s-NoOdor-0mLAir	AirLED	olfactoryArena1	Cam1	20220430T011156	6	-0.105004	-0.0305974	-0.030325	-0.0106895	-0.0280996	-0.0273179	-0.0327815	-0.00741263	0.0142103	0.00340431	0.0274252	0.0673295	0.0392991	0.0157858	0.0234842	0.0193273	0.0571844	0.0901938	0.0446159	0.00877857	-0.0220687	-0.0284776	-0.0134652	0.0183475	-0.0301197	-0.0343905	-0.0157546	-0.0198311	-0.00993752	0.0359848	0.0493407	0.112099	0.18215	0.188147	0.211076	0.164045	0.102641	0.0781419	0.133032	0.170054	0.127067
Cos(Upwind)	SS33918	20xUAS-CsChrimson-mVenus-attP18	6xLED020-10s-NoOdor-0mLAir	AirLED	olfactoryArena1	Cam0	20220413T202503	5	-0.0288447	-0.0529467	-0.0589854	-0.0463197	-0.00596027	-0.00874723	-0.0156005	0.032464	0.0514259	0.0435909	0.0724657	0.127754	0.0982252	0.124392	0.121155	0.121989	0.144394	0.112777	0.0877108	0.0473289	0.0200173	-0.010614	0.0014661	-0.0416525	-0.0526027	-0.101542	-0.0878092	-0.0611953	-0.0214738	0.0169763	0.0458919	0.0333427	-0.053722	0.0571863	0.120923	0.189402	0.0789514	0.101528	0.0770254	0.0351503	0.0538934
DeltaAnglefroPreviousFrame	SS33918	20xUAS-CsChrimson-mVenus-attP18	6xLED020-10s-NoOdor-0mLAir	AirLED	olfactoryArena1	Cam0	20220413T203910	6	78.4466	96.6774	85.7589	93.5546	89.9942	85.4159	90.2433	94.5064	96.7531	95.9954	83.9431	86.1626	80.142	90.0442	85.398	91.6962	85.699	103.786	92.168	88.966	84.5447	86.2659	72.4485	72.4649	67.1041	93.8237	86.5426	82.6977	85.0217	97.3615	85.8925	161.773	182.49	192.025	166.171	164.051	183.523	180.484	200.776	167.856	156.603
DeltaAnglefroPreviousFrame	SS33918	20xUAS-CsChrimson-mVenus-attP18	6xLED020-10s-NoOdor-0mLAir	AirLED	olfactoryArena1	Cam0	20220418T145440	6	90.8134	71.0642	65.6684	92.8616	84.4378	76.7221	73.6157	72.2889	76.8379	60.3321	65.6836	65.7275	68.5135	77.7027	78.5031	74.6335	78.9648	71.6521	86.5289	88.73	75.2265	67.2432	81.528	84.8222	83.7049	70.4382	79.2991	85.3556	82.6097	89.3293	87.0061	190.04	196.775	198.888	171.577	131.045	131.82	136.574	95.1959	124.573	122.96
DeltaAnglefroPreviousFrame	SS33918	20xUAS-CsChrimson-mVenus-attP18	6xLED020-10s-NoOdor-0mLAir	AirLED	olfactoryArena1	Cam0	20220418T145534	6	102.953	80.8389	77.4554	80.5404	78.0497	80.2843	90.8558	76.524	72.4874	79.4948	87.0097	90.8542	89.1781	89.9476	94.4434	89.9825	89.4414	96.1776	94.9287	97.869	85.5076	88.1389	96.3712	83.2143	80.5003	86.477	96.523	94.1103	100.385	95.74	82.335	160.831	241.549	187.295	171.218	132.896	144.047	125.715	134.572	138.154	128.428
DeltaAnglefroPreviousFrame	SS33918	20xUAS-CsChrimson-mVenus-attP18	6xLED020-10s-NoOdor-0mLAir	AirLED	olfactoryArena1	Cam0	20220420T180332	6	69.5898	78.4076	64.1365	56.4134	58.4371	62.3849	62.9221	64.259	65.1745	59.2918	62.6229	65.212	66.4894	71.8978	64.813	62.5805	67.0284	71.5212	63.0484	64.294	67.7586	65.4529	71.5737	63.2348	68.6391	64.4381	73.8227	67.4899	82.924	87.8552	82.5584	228.295	270.972	220.298	195.393	179.805	168.235	156.224	138.721	135.06	128.649
DeltaAnglefroPreviousFrame	SS33918	20xUAS-CsChrimson-mVenus-attP18	6xLED020-10s-NoOdor-0mLAir	AirLED	olfactoryArena1	Cam0	20220420T180945	6	73.4221	89.5169	101.955	98.4049	92.5827	98.2356	95.8342	99.2904	95.6925	76.7555	94.5365	102.037	92.5124	80.3595	86.1949	93.4202	92.5806	101.649	98.4294	101.543	93.7538	89.9652	96.3733	95.1506	84.9679	87.3947	82.4363	90.4486	102.684	80.6954	85.6826	188.58	279.624	212.612	200.527	203.476	164.12	176.705	169.591	162.969	154.546
DeltaAnglefroPreviousFrame	SS33918	20xUAS-CsChrimson-mVenus-attP18	6xLED020-10s-NoOdor-0mLAir	AirLED	olfactoryArena1	Cam0	20220420T183207	6	82.4356	106.979	92.1288	88.1728	96.621	94.0456	86.084	98.6438	90.1944	93.3342	94.5324	91.3533	93.896	86.801	94.1151	92.7401	97.0184	75.9372	89.819	87.6526	90.0686	82.705	89.686	96.6736	100.353	96.3767	102.482	97.9725	93.4139	101.399	98.3329	204.486	184.472	150.645	134.865	123.802	103.355	106.776	103.059	81.7869	84.4106
DeltaAnglefroPreviousFrame	SS33918	20xUAS-CsChrimson-mVenus-attP18	6xLED020-10s-NoOdor-0mLAir	AirLED	olfactoryArena1	Cam0	20220430T010342	6	102.968	91.3922	94.0386	88.934	93.9791	100.172	95.3258	93.1635	91.1967	88.0574	91.6937	89.1166	91.1789	87.5698	89.4165	95.3823	87.681	92.9161	90.1571	93.515	99.4761	92.3637	100.559	89.1279	105.073	95.1588	95.5571	92.997	95.0285	94.9752	93.2944	168.977	173.357	156.029	137.17	150.845	154.706	149.334	150.941	143.96	138.301
DeltaAnglefroPreviousFrame	SS33918	20xUAS-CsChrimson-mVenus-attP18	6xLED020-10s-NoOdor-0mLAir	AirLED	olfactoryArena1	Cam0	20220430T011156	6	91.1749	107.228	106.847	107.249	115.692	100.541	115.203	106.845	110.222	119.958	113.401	105.503	102.219	97.3596	114.163	105.562	106.133	108.939	106.336	104.146	108.083	110.961	108.244	108.657	109.935	109.095	106.093	99.4777	111.316	113.121	106.725	154.692	182.726	168.504	149.801	142.181	154.811	151.719	153.004	151.67	148.525
DeltaAnglefroPreviousFrame	SS33918	20xUAS-CsChrimson-mVenus-attP18	6xLED020-10s-NoOdor-0mLAir	AirLED	olfactoryArena1	Cam1	20220413T202503	6	92.027	79.104	76.0183	72.4807	72.5674	78.6944	83.0592	82.1456	90.2862	92.705	78.4176	80.4397	90.6276	79.8998	90.0098	88.9412	89.6027	76.7241	82.293	86.4849	97.322	86.4532	91.9603	90.6353	85.0775	93.0935	87.6082	87.1202	74.2944	78.3756	190.061	221.341	190.305	167.921	158.986	157.335	157.28	147.216	142.399	149.359	119.251
DeltaAnglefroPreviousFrame	SS33918	20xUAS-CsChrimson-mVenus-attP18	6xLED020-10s-NoOdor-0mLAir	AirLED	olfactoryArena1	Cam1	20220413T203910	6	105.095	80.8572	84.9563	79.5489	82.0387	79.5229	83.2611	86.2873	83.8159	87.5516	75.825	77.0481	65.9519	72.402	85.2404	82.0247	78.5409	87.4407	73.73	76.559	87.1073	93.1384	82.7802	92.2632	90.6198	81.4048	96.4573	75.5496	68.873	71.749	222.61	256.408	229.434	185.92	188.356	176.775	147.396	154.381	163.332	147.559	149.294
DeltaAnglefroPreviousFrame	SS33918	20xUAS-CsChrimson-mVenus-attP18	6xLED020-10s-NoOdor-0mLAir	AirLED	olfactoryArena1	Cam1	20220418T145440	6	81.0005	76.06	79.1114	73.946	65.7656	79.7716	82.2928	86.1277	74.1841	70.6277	59.9465	69.7057	70.0076	66.4737	75.6271	84.1474	98.212	73.1041	78.4777	76.3792	79.2118	77.4106	73.6358	82.5001	75.1567	67.0196	78.5824	77.1358	75.6384	76.6835	116.818	177.448	151.076	126.95	125.449	119.505	119.673	131.047	115.543	93.7489	111.648
DeltaAnglefroPreviousFrame	SS33918	20xUAS-CsChrimson-mVenus-attP18	6xLED020-10s-NoOdor-0mLAir	AirLED	olfactoryArena1	Cam1	20220418T145534	6	89.2706	79.6595	74.5425	70.5241	70.2785	69.3448	76.3444	69.3389	68.6244	78.0185	80.3817	73.7734	78.2214	76.5227	63.3999	83.0237	72.76	81.7544	65.8752	74.13	70.7195	80.7706	79.8563	90.6032	73.3182	73.5019	72.5813	78.5608	76.9347	74.5694	135.885	224.095	187.728	173.581	150.28	133.239	141.218	162.727	136.522	122.711	134.491
DeltaAnglefroPreviousFrame	SS33918	20xUAS-CsChrimson-mVenus-attP18	6xLED020-10s-NoOdor-0mLAir	AirLED	olfactoryArena1	Cam1	20220420T180332	6	62.296	91.8646	81.1898	82.7256	84.4711	89.8694	103.338	95.3175	104.666	102.512	85.0226	91.4592	89.0905	97.1394	79.3881	89.1876	87.8241	98.7896	85.9751	76.157	82.2831	82.382	89.4099	87.2067	77.9302	82.6952	88.591	90.0136	89.3761	91.3878	153.42	181.111	167.768	170.318	143.803	124.766	125.778	130.788	122.768	134.221	140.313
DeltaAnglefroPreviousFrame	SS33918	20xUAS-CsChrimson-mVenus-attP18	6xLED020-10s-NoOdor-0mLAir	AirLED	olfactoryArena1	Cam1	20220420T183207	6	83.6193	59.1303	74.1056	69.2383	62.8174	67.5475	73.718	75.2293	67.6587	75.4299	65.1783	56.6452	59.5694	64.5622	60.7906	52.2115	53.5221	51.132	66.3912	63.2779	52.9749	59.5919	58.4515	53.2238	62.7423	57.7925	66.0884	67.3114	56.0471	62.4695	170.614	147.606	121.289	105.073	94.6747	90.1149	94.5438	84.035	69.2659	66.3093	69.3409
DeltaAnglefroPreviousFrame	SS33918	20xUAS-CsChrimson-mVenus-attP18	6xLED020-10s-NoOdor-0mLAir	AirLED	olfactoryArena1	Cam1	20220430T010342	6	89.1791	106.553	110.462	108.867	120.618	123.333	113.818	111.683	119.056	118.571	112.025	105.678	108.978	114.236	116.265	115.208	113.434	109.281	118.2	114.959	113.641	117.806	112.241	115.456	118.158	112.353	110.128	118.972	112.702	113.571	162.41	184.462	166.942	179.998	180.286	176.255	175.848	179.349	191.04	176.128	187.432
DeltaAnglefroPreviousFrame	SS33918	20xUAS-CsChrimson-mVenus-attP18	6xLED020-10s-NoOdor-0mLAir	AirLED	olfactoryArena1	Cam1	20220430T011156	6	94.6248	97.8345	97.11	109.688	109.939	102.79	94.6829	89.8151	92.5576	101.343	111.433	108.536	100.696	115.74	106.938	104.624	108.928	114.74	111.297	111.795	98.0609	103.178	104.392	102.046	109.544	96.2889	98.5963	101.146	109.795	112.608	171.897	181.9	157.874	134.6	152.73	157.374	159.266	169.729	146.333	163.648	154.083
DeltaAnglefroPreviousFrame	SS33918	20xUAS-CsChrimson-mVenus-attP18	6xLED020-10s-NoOdor-0mLAir	AirLED	olfactoryArena1	Cam0	20220413T202503	5	80.7416	88.161	72.2654	91.57	99.6057	91.3265	93.0764	91.5306	92.7602	97.036	96.0351	90.1057	75.6881	77.8596	81.9539	76.1991	97.0776	85.3916	83.8917	89.0903	86.3456	75.645	79.5077	77.6011	81.6899	80.9601	82.8929	82.7811	89.269	82.027	87.4712	237.046	257.812	193.873	176.084	173.924	161.215	164.002	154.169	164.872	157.016
WalkingDistanceFromPreviousFrame	SS33918	20xUAS-CsChrimson-mVenus-attP18	6xLED020-10s-NoOdor-0mLAir	AirLED	olfactoryArena1	Cam0	20220413T203910	6	2.33488	2.73098	2.89318	2.82474	2.48779	2.31502	2.18435	1.90421	1.93451	2.21491	2.19918	2.06687	2.08556	1.97684	1.96673	1.98211	2.01293	2.17205	2.21972	2.14904	2.02431	2.55005	2.42805	2.29046	2.1481	1.98354	2.14572	2.03391	1.86783	1.84003	2.00223	2.1859	2.23212	2.45651	2.69521	2.74533	2.74506	2.81196	2.6751	2.58966	2.57635
WalkingDistanceFromPreviousFrame	SS33918	20xUAS-CsChrimson-mVenus-attP18	6xLED020-10s-NoOdor-0mLAir	AirLED	olfactoryArena1	Cam0	20220418T145440	6	1.87619	1.90593	1.76356	1.83943	1.96728	2.07896	2.27979	2.3038	2.41567	2.39053	2.30315	2.39936	2.1823	2.16119	1.97085	1.87965	1.86428	1.64471	1.79374	1.78995	1.86643	1.91164	1.98636	2.10415	1.94704	1.83314	1.9478	1.88172	1.98953	1.86132	1.89487	2.39344	2.06868	2.37535	2.97972	3.14084	3.15646	3.00741	2.2536	2.18117	2.30239
WalkingDistanceFromPreviousFrame	SS33918	20xUAS-CsChrimson-mVenus-attP18	6xLED020-10s-NoOdor-0mLAir	AirLED	olfactoryArena1	Cam0	20220418T145534	6	1.21195	1.44261	1.31547	1.50302	1.57006	1.73561	1.81382	1.76233	1.55512	1.7325	1.81324	1.90251	1.90769	1.8691	1.85619	1.92532	1.87873	1.70126	1.55543	1.73656	1.6566	1.50294	1.48859	1.42945	1.36626	1.36103	1.65558	1.58566	1.78385	1.68945	1.65853	2.18125	2.25103	2.88403	3.18623	2.79345	2.59694	2.37491	2.39164	2.244	1.89771
WalkingDistanceFromPreviousFrame	SS33918	20xUAS-CsChrimson-mVenus-attP18	6xLED020-10s-NoOdor-0mLAir	AirLED	olfactoryArena1	Cam0	20220420T180332	6	1.9467	2.12729	2.24549	2.20753	2.05927	2.13568	2.17026	2.20488	2.25386	2.23781	2.25167	2.23936	2.10822	2.35708	2.24729	2.12	2.04298	2.0366	1.99448	2.09879	2.07201	2.19135	2.17758	2.2499	2.32493	2.52004	2.38194	2.48687	2.21267	2.11198	2.31199	2.45734	2.46615	2.76633	3.16671	2.95683	2.85941	2.71751	2.51733	2.45094	2.34685
WalkingDistanceFromPreviousFrame	SS33918	20xUAS-CsChrimson-mVenus-attP18	6xLED020-10s-NoOdor-0mLAir	AirLED	olfactoryArena1	Cam0	20220420T180945	6	2.59245	2.83836	2.71663	2.17503	2.40465	2.7736	2.80502	2.76486	2.57725	2.5428	2.65607	2.44508	2.54691	2.75131	2.72172	2.88373	2.88114	2.59848	2.92727	3.06284	2.86124	2.795	2.50198	2.66025	2.63133	2.66826	2.6996	2.7276	2.81721	2.79736	2.52117	3.14121	2.7012	3.53241	3.97793	4.02269	3.86871	3.46005	3.46405	3.61947	3.49841
WalkingDistanceFromPreviousFrame	SS33918	20xUAS-CsChrimson-mVenus-attP18	6xLED020-10s-NoOdor-0mLAir	AirLED	olfactoryArena1	Cam0	20220420T183207	6	1.96825	2.42548	2.49129	2.5849	2.94425	2.42791	2.59538	2.4998	2.53181	2.40294	2.30978	2.32068	2.34887	2.2981	2.24864	2.3443	2.43983	2.06599	2.05863	2.19664	2.30194	2.31219	2.38109	2.27521	2.28001	2.36461	2.19808	2.31874	2.42441	2.50397	2.23376	2.54571	2.16417	2.43265	2.01972	2.06026	1.56549	1.40621	1.43001	1.21067	1.26195
WalkingDistanceFromPreviousFrame	SS33918	20xUAS-CsChrimson-mVenus-attP18	6xLED020-10s-NoOdor-0mLAir	AirLED	olfactoryArena1	Cam0	20220430T010342	6	1.71097	2.08136	2.06682	1.93176	1.7609	1.86739	1.92323	1.94416	1.91584	1.82919	1.92729	1.88796	1.83756	1.79469	1.73289	1.71884	1.78818	1.84393	1.75619	1.90239	1.83678	2.09652	2.15939	2.00786	2.10193	2.00605	2.05488	2.03635	1.97384	1.82694	1.96425	2.54148	2.68335	3.10724	3.27578	3.22298	3.00349	2.80257	2.782	2.49021	2.30848
WalkingDistanceFromPreviousFrame	SS33918	20xUAS-CsChrimson-mVenus-attP18	6xLED020-10s-NoOdor-0mLAir	AirLED	olfactoryArena1	Cam0	20220430T011156	6	2.62148	2.84729	2.75996	2.84431	2.9765	2.84863	2.78718	2.89314	2.76667	2.82534	2.9287	2.90175	2.75042	2.57615	2.72182	2.62359	2.69872	2.88931	2.90818	2.66556	2.65129	2.74685	2.76007	2.82247	2.83299	2.74315	2.79898	2.57393	2.56321	2.74933	2.7656	3.58673	3.38461	3.54169	3.41778	3.77143	3.68127	3.47884	3.18063	3.12117	3.08039
WalkingDistanceFromPreviousFrame	SS33918	20xUAS-CsChrimson-mVenus-attP18	6xLED020-10s-NoOdor-0mLAir	AirLED	olfactoryArena1	Cam1	20220413T202503	6	1.63237	1.81402	1.83571	1.72253	1.72283	1.71677	1.77177	1.86535	1.88276	1.99371	2.08995	1.9985	2.0832	2.04752	2.11933	2.09739	2.16386	2.22063	1.9284	1.98834	2.03461	1.79551	1.63263	1.64839	1.9204	2.00788	1.89057	1.7968	1.75808	1.67271	2.50651	2.36846	2.7846	2.71167	2.77838	2.79171	2.7022	2.59399	2.40819	2.45289	2.34164
WalkingDistanceFromPreviousFrame	SS33918	20xUAS-CsChrimson-mVenus-attP18	6xLED020-10s-NoOdor-0mLAir	AirLED	olfactoryArena1	Cam1	20220413T203910	6	1.80059	2.02999	2.17911	2.16255	2.2321	2.26898	2.15258	2.2252	2.21316	1.88886	1.8284	1.78149	1.9686	2.25966	2.22467	2.05704	2.07209	2.36009	2.47324	2.39612	2.03285	1.98359	2.047	2.04862	1.86888	1.70576	1.94436	1.9436	2.10635	1.93641	2.73624	2.6669	2.96338	3.04103	2.9234	2.59803	2.34784	2.21529	2.34033	2.38248	2.24778
WalkingDistanceFromPreviousFrame	SS33918	20xUAS-CsChrimson-mVenus-attP18	6xLED020-10s-NoOdor-0mLAir	AirLED	olfactoryArena1	Cam1	20220418T145440	6	1.6772	1.81443	1.97485	1.80709	1.60568	1.58672	1.73051	2.11367	2.08985	1.73823	1.61708	1.5082	1.64871	1.7413	1.67887	1.78821	1.84514	1.82753	1.83829	1.83201	1.7394	2.04809	1.99107	1.97725	1.86737	1.74438	1.78368	1.93441	1.90438	1.93267	2.30741	2.48927	3.23213	3.51008	3.25286	2.88616	2.54995	2.19286	2.35538	2.39522	2.22123
WalkingDistanceFromPreviousFrame	SS33918	20xUAS-CsChrimson-mVenus-attP18	6xLED020-10s-NoOdor-0mLAir	AirLED	olfactoryArena1	Cam1	20220418T145534	6	1.52938	1.86667	1.68723	1.57987	1.54526	1.6966	1.97268	1.89535	1.84415	1.85924	1.92569	1.89502	1.86016	1.89587	1.89573	1.91747	1.96134	2.00701	1.92097	1.781	1.67648	1.71007	1.75179	2.06683	1.76198	1.85481	1.756	1.6425	1.64722	1.75334	1.98905	1.80141	2.0764	2.44391	2.49697	2.41066	2.38604	2.67233	2.37965	2.13579	2.33919
WalkingDistanceFromPreviousFrame	SS33918	20xUAS-CsChrimson-mVenus-attP18	6xLED020-10s-NoOdor-0mLAir	AirLED	olfactoryArena1	Cam1	20220420T180332	6	2.51155	2.88782	2.89471	2.65456	2.54657	2.41632	2.44548	2.23451	2.26208	2.17723	2.21026	2.34229	2.42587	2.59195	2.55971	2.60229	2.6676	2.67629	2.64355	2.23087	2.28769	2.34318	2.42338	2.481	2.50905	2.66412	2.72878	2.65905	2.52175	2.64343	2.9154	2.52461	2.82589	3.1406	3.26135	3.45155	3.16506	3.0712	2.8973	2.70158	2.55429
WalkingDistanceFromPreviousFrame	SS33918	20xUAS-CsChrimson-mVenus-attP18	6xLED020-10s-NoOdor-0mLAir	AirLED	olfactoryArena1	Cam1	20220420T183207	6	1.59433	1.70473	1.80695	1.8374	1.78457	1.75225	1.85625	1.89948	1.64257	1.70318	1.66253	1.66466	1.68685	1.74385	1.68266	1.63081	1.63929	1.59697	1.51774	1.66114	1.91683	1.91401	1.83079	2.02773	1.97931	1.94833	1.88718	1.95523	2.11821	2.18248	3.10436	2.20009	2.36977	2.33125	2.13157	1.88714	1.64357	1.51047	1.31778	1.20219	1.23547
WalkingDistanceFromPreviousFrame	SS33918	20xUAS-CsChrimson-mVenus-attP18	6xLED020-10s-NoOdor-0mLAir	AirLED	olfactoryArena1	Cam1	20220430T010342	6	2.54622	2.70005	2.66125	2.6293	2.88288	3.00322	2.93985	2.98277	2.82924	2.96821	2.9881	2.8897	3.02567	2.97273	2.98453	2.92693	2.86519	2.97443	2.88458	2.78093	2.84759	2.8981	2.88938	2.91577	2.90922	2.76395	2.61032	2.69095	2.7786	2.86621	3.74696	3.84214	4.04504	3.8002	3.83692	3.67498	3.50696	3.71886	3.36034	2.99723	3.03718
WalkingDistanceFromPreviousFrame	SS33918	20xUAS-CsChrimson-mVenus-attP18	6xLED020-10s-NoOdor-0mLAir	AirLED	olfactoryArena1	Cam1	20220430T011156	6	2.36529	2.73008	2.68226	2.60404	2.76722	2.52204	2.53959	2.36687	2.33358	2.40565	2.49752	2.43325	2.43026	2.46498	2.47876	2.50873	2.43356	2.59448	2.54385	2.64547	2.59988	2.51569	2.50957	2.5027	2.57034	2.39015	2.35616	2.4735	2.57935	2.69129	3.43574	3.20483	3.54922	3.5278	3.3519	3.08116	3.16197	2.95421	2.79311	2.70979	2.59421
WalkingDistanceFromPreviousFrame	SS33918	20xUAS-CsChrimson-mVenus-attP18	6xLED020-10s-NoOdor-0mLAir	AirLED	olfactoryArena1	Cam0	20220413T202503	5	2.7597	2.92084	2.79318	2.8809	3.18729	3.32366	3.37843	3.39618	3.12393	3.31481	3.08184	3.12525	2.7636	2.32561	2.38694	2.572	2.60328	2.55744	2.56525	2.58414	2.70551	2.57237	2.47159	2.57598	2.49622	2.76356	2.8487	2.8998	3.03305	2.99748	3.15263	3.47997	3.58496	4.18652	4.0572	3.77044	3.66234	3.50749	3.73512	3.71441	4.01378
revisit-10mmOut3mmIn-15s	SS33918	20xUAS-CsChrimson-mVenus-attP18	6xLED020-10s-NoOdor-0mLAir	AirLED	olfactoryArena1	Cam0	20220413T203910	6	0.0936779	0.110337	0.11	0.103333	0.115	0.085	0.0933333	0.085	0.0733333	0.136667	0.128333	0.118333	0.108333	0.121667	0.126667	0.12027	0.142107	0.135	0.15	0.1528	0.176667	0.241667	0.275404	0.278333	0.233333	0.257384	0.282037	0.327037	0.360926	0.418519	0.390185	0.333535	0.317037	0.349226	0.402037	0.390741	0.405101	0.380824	0.38905	0.380875	0.40413
revisit-10mmOut3mmIn-15s	SS33918	20xUAS-CsChrimson-mVenus-attP18	6xLED020-10s-NoOdor-0mLAir	AirLED	olfactoryArena1	Cam0	20220418T145440	6	0.0211268	0.0208333	0.0208333	0.0660714	0.0675595	0.0779762	0.0946429	0.102976	0.11756	0.142262	0.14494	0.147619	0.0934524	0.104464	0.152976	0.12619	0.115179	0.111012	0.0922619	0.0922619	0.0940181	0.112137	0.141667	0.143844	0.153745	0.172858	0.165939	0.19256	0.183801	0.246417	0.239484	0.244655	0.252717	0.276081	0.286059	0.321726	0.236607	0.244048	0.277976	0.293651	0.288534
revisit-10mmOut3mmIn-15s	SS33918	20xUAS-CsChrimson-mVenus-attP18	6xLED020-10s-NoOdor-0mLAir	AirLED	olfactoryArena1	Cam0	20220418T145534	6	0.0863647	0.0775253	0.077642	0.0785173	0.0775253	0.0892929	0.0997604	0.0986111	0.114015	0.137929	0.136742	0.134848	0.106439	0.0870692	0.0797306	0.0818182	0.0867668	0.0901839	0.102399	0.143561	0.142009	0.149747	0.152955	0.132121	0.14303	0.116825	0.109455	0.0887879	0.0938238	0.0821128	0.0704323	0.0770202	0.105319	0.115686	0.0827419	0.0824059	0.132027	0.18772	0.192693	0.198822	0.193635
revisit-10mmOut3mmIn-15s	SS33918	20xUAS-CsChrimson-mVenus-attP18	6xLED020-10s-NoOdor-0mLAir	AirLED	olfactoryArena1	Cam0	20220420T180332	6	0.0471868	0.0485348	0.0544872	0.0606399	0.0607424	0.0520419	0.0583751	0.0557058	0.0520147	0.0706044	0.0650771	0.06163	0.0604396	0.064011	0.0986264	0.114927	0.117766	0.134249	0.13663	0.123535	0.128297	0.131868	0.140201	0.133608	0.1366	0.157509	0.164652	0.231319	0.245604	0.272222	0.313633	0.278529	0.275864	0.278964	0.249804	0.255357	0.290278	0.28076	0.242196	0.237363	0.268539
revisit-10mmOut3mmIn-15s	SS33918	20xUAS-CsChrimson-mVenus-attP18	6xLED020-10s-NoOdor-0mLAir	AirLED	olfactoryArena1	Cam0	20220420T180945	6	0.0788143	0.049504	0.0439815	0.09375	0.0856804	0.103098	0.125	0.14375	0.133333	0.11875	0.0895833	0.0877637	0.0904762	0.110606	0.0970238	0.0679277	0.0873373	0.11011	0.116733	0.138459	0.160185	0.191667	0.209259	0.216582	0.274074	0.315972	0.288657	0.267361	0.261737	0.198942	0.249519	0.30695	0.309259	0.278544	0.214583	0.188806	0.184961	0.144237	0.178776	0.217164	0.160886
revisit-10mmOut3mmIn-15s	SS33918	20xUAS-CsChrimson-mVenus-attP18	6xLED020-10s-NoOdor-0mLAir	AirLED	olfactoryArena1	Cam0	20220420T183207	6	0.0799739	0.0621795	0.0486111	0.0448413	0.03663	0.0429995	0.017033	0.0119048	0.0362357	0.0297619	0.0111857	0.0259463	0.0309108	0.0247253	0.0285714	0.0376452	0.0375458	0.0375458	0.0382407	0.0471974	0.0350919	0.0566838	0.0525031	0.0461067	0.0741148	0.0949029	0.0854396	0.0896189	0.0792579	0.0534077	0.0576831	0.061441	0.0503384	0.0442308	0.0628087	0.0566033	0.0532553	0.0644312	0.0519934	0.0396032	0.0585381
revisit-10mmOut3mmIn-15s	SS33918	20xUAS-CsChrimson-mVenus-attP18	6xLED020-10s-NoOdor-0mLAir	AirLED	olfactoryArena1	Cam0	20220430T010342	6	0.144727	0.135093	0.12654	0.126521	0.0974098	0.0924279	0.100707	0.101046	0.119625	0.146411	0.149066	0.115786	0.0986797	0.117013	0.130763	0.134555	0.169776	0.172323	0.175538	0.187833	0.167435	0.148861	0.146977	0.156989	0.164237	0.165873	0.181824	0.174224	0.157817	0.200272	0.219324	0.2457	0.277713	0.280978	0.33154	0.358268	0.328047	0.278752	0.262764	0.258936	0.266955
revisit-10mmOut3mmIn-15s	SS33918	20xUAS-CsChrimson-mVenus-attP18	6xLED020-10s-NoOdor-0mLAir	AirLED	olfactoryArena1	Cam0	20220430T011156	6	0.145781	0.172115	0.181052	0.198209	0.190641	0.177545	0.17491	0.171786	0.163835	0.145699	0.150233	0.146773	0.145925	0.13513	0.147222	0.141967	0.156747	0.164075	0.159614	0.169416	0.178199	0.188629	0.183654	0.190017	0.215534	0.230266	0.242609	0.272792	0.266267	0.270395	0.295279	0.294815	0.30776	0.300251	0.32161	0.302028	0.267449	0.274993	0.250502	0.273622	0.282212
revisit-10mmOut3mmIn-15s	SS33918	20xUAS-CsChrimson-mVenus-attP18	6xLED020-10s-NoOdor-0mLAir	AirLED	olfactoryArena1	Cam1	20220413T202503	6	0.0931653	0.0822222	0.0779279	0.0911111	0.10374	0.103175	0.117032	0.106667	0.11	0.116667	0.112222	0.125556	0.138889	0.144745	0.141508	0.157683	0.137778	0.151327	0.147143	0.146032	0.158095	0.150873	0.168582	0.180612	0.186967	0.192222	0.178889	0.165556	0.148889	0.162222	0.128269	0.14918	0.11689	0.116667	0.140179	0.15	0.174149	0.203492	0.227937	0.236572	0.217778
revisit-10mmOut3mmIn-15s	SS33918	20xUAS-CsChrimson-mVenus-attP18	6xLED020-10s-NoOdor-0mLAir	AirLED	olfactoryArena1	Cam1	20220413T203910	6	0.0994719	0.101879	0.121465	0.131587	0.129293	0.133838	0.128788	0.119949	0.135354	0.126263	0.142045	0.164347	0.156339	0.18697	0.161868	0.136159	0.124369	0.105145	0.0976768	0.101796	0.0970531	0.106061	0.0969697	0.0924242	0.0984848	0.0924242	0.137879	0.190909	0.223158	0.189672	0.183295	0.166159	0.128788	0.161485	0.18459	0.200614	0.212374	0.16553	0.158042	0.171085	0.159848
revisit-10mmOut3mmIn-15s	SS33918	20xUAS-CsChrimson-mVenus-attP18	6xLED020-10s-NoOdor-0mLAir	AirLED	olfactoryArena1	Cam1	20220418T145440	6	0.0551282	0.0537037	0.0537037	0.0537037	0.057037	0.0901961	0.0995131	0.122222	0.144444	0.159259	0.159259	0.176111	0.17037	0.145741	0.137037	0.138889	0.113519	0.103704	0.103704	0.11037	0.12037	0.111111	0.108519	0.101852	0.101852	0.100926	0.0833333	0.0933333	0.109933	0.143519	0.209259	0.226852	0.229259	0.27501	0.242778	0.262306	0.241481	0.21037	0.199613	0.195	0.165
revisit-10mmOut3mmIn-15s	SS33918	20xUAS-CsChrimson-mVenus-attP18	6xLED020-10s-NoOdor-0mLAir	AirLED	olfactoryArena1	Cam1	20220418T145534	6	0.105478	0.101276	0.10119	0.109524	0.114286	0.114286	0.0880952	0.0928571	0.0964286	0.0952381	0.0761905	0.0892857	0.0952381	0.113095	0.108333	0.0833333	0.114286	0.12619	0.140476	0.127381	0.111905	0.10119	0.0869048	0.103947	0.103571	0.116667	0.102381	0.125	0.147619	0.111905	0.118568	0.144048	0.148711	0.180952	0.179683	0.212381	0.180453	0.16246	0.150476	0.156984	0.143046
revisit-10mmOut3mmIn-15s	SS33918	20xUAS-CsChrimson-mVenus-attP18	6xLED020-10s-NoOdor-0mLAir	AirLED	olfactoryArena1	Cam1	20220420T180332	6	0.085702	0.0732323	0.0872727	0.0736364	0.0810606	0.0856061	0.0814107	0.0568182	0.0628788	0.0522727	0.0431818	0.0568182	0.075	0.0498737	0.059596	0.0953283	0.095202	0.0477273	0.0525253	0.0287879	0.0166667	0.0359053	0.0734848	0.0872167	0.0869949	0.130808	0.166414	0.173737	0.182323	0.184596	0.183207	0.248106	0.238359	0.216909	0.216698	0.183283	0.182121	0.233161	0.255707	0.219802	0.183586
revisit-10mmOut3mmIn-15s	SS33918	20xUAS-CsChrimson-mVenus-attP18	6xLED020-10s-NoOdor-0mLAir	AirLED	olfactoryArena1	Cam1	20220420T183207	6	0.0559107	0.0632326	0.0627747	0.0450549	0.0661172	0.0738095	0.0545788	0.0589744	0.0708791	0.0665313	0.0497253	0.0631868	0.078739	0.0735756	0.0410256	0.0384615	0.0478022	0.0401099	0.0311355	0.0266484	0.0205128	0.0153846	0.0398504	0.0866453	0.0752137	0.0608364	0.0640415	0.0622253	0.05961	0.0228632	0.0419788	0.03663	0.0473443	0.0741453	0.0740936	0.0730159	0.0537698	0.0496032	0.0496032	0.0464749	0.0450244
revisit-10mmOut3mmIn-15s	SS33918	20xUAS-CsChrimson-mVenus-attP18	6xLED020-10s-NoOdor-0mLAir	AirLED	olfactoryArena1	Cam1	20220430T010342	6	0.11309	0.124461	0.129512	0.120823	0.123617	0.124573	0.13038	0.129623	0.149233	0.144901	0.136422	0.14049	0.15844	0.166975	0.156346	0.153915	0.149104	0.145109	0.156525	0.164077	0.17836	0.174686	0.193847	0.188245	0.161928	0.172115	0.185449	0.176282	0.164828	0.165904	0.180757	0.19653	0.226609	0.237947	0.240148	0.229323	0.208284	0.226084	0.222616	0.214527	0.197994
revisit-10mmOut3mmIn-15s	SS33918	20xUAS-CsChrimson-mVenus-attP18	6xLED020-10s-NoOdor-0mLAir	AirLED	olfactoryArena1	Cam1	20220430T011156	6	0.124681	0.138927	0.148433	0.134572	0.141227	0.147404	0.155105	0.175281	0.164077	0.161576	0.138865	0.127732	0.125292	0.118336	0.118252	0.120669	0.117696	0.128486	0.121456	0.155419	0.183545	0.167968	0.158412	0.17824	0.171457	0.177036	0.196763	0.224826	0.21852	0.213056	0.1916	0.207451	0.226856	0.229505	0.224308	0.219566	0.268416	0.268182	0.259931	0.253441	0.276498
revisit-10mmOut3mmIn-15s	SS33918	20xUAS-CsChrimson-mVenus-attP18	6xLED020-10s-NoOdor-0mLAir	AirLED	olfactoryArena1	Cam0	20220413T202503	5	0.13377	0.160718	0.191954	0.173192	0.154857	0.171338	0.164046	0.158626	0.122119	0.100391	0.0993964	0.110159	0.0959211	0.125064	0.0974359	0.0835033	0.109886	0.0985532	0.0779048	0.109393	0.127784	0.107896	0.115555	0.12068	0.124408	0.142988	0.145925	0.171485	0.218756	0.232393	0.24953	0.269415	0.227023	0.233353	0.202507	0.193859	0.208075	0.203413	0.226219	0.236842	0.253481
DeltaDistanceFromCenter	SS49755	20xUAS-CsChrimson-mVenus-attP18	6xLED020-10s-NoOdor-0mLAir	AirLED	olfactoryArena1	Cam0	20220413T213218	6	0.0221878	0.0277222	0.0313443	0.0373726	0.0378191	0.0451374	0.0561653	0.0607848	0.0620581	0.0618763	0.0543345	0.0380023	0.0356402	0.0368922	0.0408681	0.0445577	0.04123	0.0333373	0.0267556	0.0208904	0.0114798	0.00546772	0.00101654	0.00860437	0.0151979	0.0169405	0.013098	0.0114919	0.00554131	0	-0.0056604	-0.00477342	-0.00268007	0.00158449	-0.00428514	-0.0252238	-0.0313848	-0.0220982	-0.0094116	0.00925968	0.000587575
DeltaDistanceFromCenter	SS49755	20xUAS-CsChrimson-mVenus-attP18	6xLED020-10s-NoOdor-0mLAir	AirLED	olfactoryArena1	Cam0	20220413T213516	6	0.0104245	0.00559947	0.00167205	0.00464656	0.0101546	0.0198352	0.0210876	0.0183276	0.0147394	0.0100272	0.00763189	0.00150986	-0.00558029	-0.00682565	-0.00971736	-0.0195828	-0.028947	-0.0267824	-0.0354934	-0.0335024	-0.0338023	-0.032919	-0.0342631	-0.0333412	-0.02815	-0.0237079	-0.0153313	-0.0112602	-0.00754755	0	0.0130906	0.019816	0.0155507	0.00920309	0.00428225	0.00271584	0.00427492	0.0100764	0.00828996	0.00300889	0.0125971
DeltaDistanceFromCenter	SS49755	20xUAS-CsChrimson-mVenus-attP18	6xLED020-10s-NoOdor-0mLAir	AirLED	olfactoryArena1	Cam0	20220413T214715	6	-0.0114984	-0.00759994	-0.0080874	-0.0121918	-0.0116042	-0.00533979	0.0023386	0.000269793	-0.007989	-0.0136327	-0.0121014	-0.01727	-0.0154621	-0.0220301	-0.0246147	-0.013732	-0.0075337	-0.0101784	-0.004022	-0.000939814	-0.000271531	-0.0053519	-0.00996689	-0.011679	-0.0247189	-0.0245516	-0.0268968	-0.0194691	-0.011248	0	-0.00357509	-0.0108408	-0.00895418	-0.0102293	-0.0127088	-0.00800035	-0.00544382	-0.0224867	-0.0412997	-0.035155	-0.0319883
DeltaDistanceFromCenter	SS49755	20xUAS-CsChrimson-mVenus-attP18	6xLED020-10s-NoOdor-0mLAir	AirLED	olfactoryArena1	Cam0	20220413T215052	6	0.02847	0.0268011	0.027675	0.0264981	0.0217346	0.019831	0.0178901	0.018622	0.0183158	0.0133585	0.00874559	0.00836393	0.00354484	-0.00143526	-0.00582548	-0.0125313	-0.0144115	-0.0127048	-0.00871246	-0.00521942	-0.00781177	-0.00989814	-0.00934958	-0.00305436	-0.0047105	-0.00231289	-6.162e-06	0.00206284	0.00335303	0	0.00310359	0.00462539	0.00774459	0.00956183	0.00665329	0.00275237	0.00305415	0.00213023	0.00621597	0.0126904	0.00893372
DeltaDistanceFromCenter	SS49755	20xUAS-CsChrimson-mVenus-attP18	6xLED020-10s-NoOdor-0mLAir	AirLED	olfactoryArena1	Cam0	20220413T220431	6	-0.0598837	-0.0583905	-0.0553298	-0.0474126	-0.0387821	-0.0312438	-0.0228088	-0.0154734	-0.0125599	-0.00999136	-0.00559161	-0.00641966	-0.00376747	-0.00285168	0.00196788	0.00227424	0.0009769	-0.00274924	-0.00703035	-0.0133523	-0.0236575	-0.0246729	-0.0232148	-0.0173072	-0.0130804	-0.0109783	-0.00785304	-0.00539676	-0.00038008	0	0.00139506	0.00817557	0.0120212	0.00987554	0.00793115	0.00609022	0.00696739	0.00682748	0.000856667	0.00186858	-0.00042058
DeltaDistanceFromCenter	SS49755	20xUAS-CsChrimson-mVenus-attP18	6xLED020-10s-NoOdor-0mLAir	AirLED	olfactoryArena1	Cam0	20220418T162324	6	-0.013951	-0.0112137	-0.00595508	-0.000568744	-0.00340996	-0.00410818	2.755e-05	0.00582594	0.0101673	0.0107891	0.00952076	0.00519349	-0.00149647	-0.00740452	-0.0123464	-0.0186514	-0.0278832	-0.0393049	-0.0439244	-0.046695	-0.0525703	-0.0514996	-0.0449641	-0.036112	-0.0287913	-0.0172742	-0.00806338	-0.00544165	-0.0040109	0	0.000196483	0.00456392	0.00938764	0.00722167	0.0028357	-0.00701858	-0.00991855	-0.00457862	0.00741743	0.0243824	0.0379564
DeltaDistanceFromCenter	SS49755	20xUAS-CsChrimson-mVenus-attP18	6xLED020-10s-NoOdor-0mLAir	AirLED	olfactoryArena1	Cam0	20220418T163823	6	-0.0577376	-0.0598178	-0.0589142	-0.0586096	-0.0548542	-0.0511486	-0.0463198	-0.0429992	-0.0401167	-0.0421309	-0.0417588	-0.0398128	-0.0397129	-0.0392598	-0.0345965	-0.0323468	-0.0251241	-0.0193935	-0.0190689	-0.0205552	-0.0156572	-0.00867176	-0.00537676	-0.00655447	-0.00707564	-0.00798364	-0.0010391	0.000979123	0.00332697	0	-0.0018189	-0.00747799	-0.0133432	-0.0223177	-0.0211135	-0.0155029	-0.0069422	0.00800369	0.0121337	0.0176385	0.0207966
DeltaDistanceFromCenter	SS49755	20xUAS-CsChrimson-mVenus-attP18	6xLED020-10s-NoOdor-0mLAir	AirLED	olfactoryArena1	Cam0	20220418T164101	6	-0.0543302	-0.0666255	-0.0722803	-0.0817524	-0.0916342	-0.101633	-0.112633	-0.115769	-0.111709	-0.0996301	-0.0938481	-0.0822496	-0.0719094	-0.0663218	-0.0591242	-0.0546277	-0.049578	-0.040837	-0.0386068	-0.0401468	-0.0400042	-0.0485671	-0.0547298	-0.0587908	-0.0599536	-0.0505953	-0.0436361	-0.0268568	-0.0117736	0	0.00823269	0.00428058	0.00642592	0.00800187	0.00540937	0.00304423	0.00202504	0.00227218	0.00119108	-0.00467841	-0.00413236
DeltaDistanceFromCenter	SS49755	20xUAS-CsChrimson-mVenus-attP18	6xLED020-10s-NoOdor-0mLAir	AirLED	olfactoryArena1	Cam0	20220418T165822	6	-0.008928	-0.0114149	-0.0177651	-0.0203936	-0.0162735	-0.0179513	-0.0186835	-0.019825	-0.0213379	-0.0234894	-0.0149469	-0.00792433	0.00290885	0.00997505	0.0113469	0.0160478	0.0179017	0.0262861	0.0404387	0.0494373	0.0533078	0.0561648	0.0525927	0.0477392	0.0433443	0.0313777	0.0245987	0.0189304	0.0123324	0	-0.00835173	-0.0159452	-0.0300899	-0.0377072	-0.0319689	-0.0281141	-0.0332539	-0.034663	-0.0384904	-0.0481091	-0.0367988
DeltaDistanceFromCenter	SS49755	20xUAS-CsChrimson-mVenus-attP18	6xLED020-10s-NoOdor-0mLAir	AirLED	olfactoryArena1	Cam0	20220420T191005	6	-0.0861569	-0.089167	-0.0919349	-0.0855093	-0.0806736	-0.0879099	-0.0905886	-0.0851019	-0.0802929	-0.0750282	-0.0547005	-0.0545161	-0.0561992	-0.0508232	-0.0422981	-0.0370685	-0.0368073	-0.039212	-0.0406917	-0.036388	-0.0268632	-0.0209368	-0.0196449	-0.0206088	-0.0209135	-0.0173359	-0.0143527	-0.0125914	-0.00899377	0	-0.000623031	0.00361305	0.00394996	0.00126129	-0.00430533	-0.0136843	-0.0200004	-0.0233145	-0.0268877	-0.0275158	-0.0222378
DeltaDistanceFromCenter	SS49755	20xUAS-CsChrimson-mVenus-attP18	6xLED020-10s-NoOdor-0mLAir	AirLED	olfactoryArena1	Cam0	20220420T191613	6	-0.0465768	-0.0400325	-0.0370602	-0.036787	-0.0397574	-0.0454437	-0.0494607	-0.0590784	-0.0659017	-0.0678672	-0.0658965	-0.0580166	-0.0498102	-0.0375087	-0.0278005	-0.0212361	-0.0138421	-0.00249189	0.00464587	0.00312592	-0.00164036	0.00095219	0.00114913	-0.00110454	-0.00209336	0.00325463	0.00458088	0.0060554	0.00481004	0	-0.00716829	-0.0155892	-0.0275242	-0.0325107	-0.0460361	-0.0539131	-0.0533753	-0.049706	-0.0442631	-0.0459876	-0.0360996
DeltaDistanceFromCenter	SS49755	20xUAS-CsChrimson-mVenus-attP18	6xLED020-10s-NoOdor-0mLAir	AirLED	olfactoryArena1	Cam0	20220420T193039	6	-0.033536	-0.0344347	-0.0333655	-0.0373212	-0.0462091	-0.0505839	-0.0487355	-0.0398358	-0.0343492	-0.0330046	-0.0273187	-0.0182041	-0.0077527	-0.00922649	-0.0116014	-0.0103532	-0.00724334	-0.00945968	-0.0143893	-0.0117872	-0.0118384	-0.00510442	0.00250783	0.00539017	0.00626639	0.0072511	0.0118316	0.0152691	0.0112053	0	-0.00444324	-0.0126266	-0.0161137	-0.0214962	-0.0232093	-0.0198966	-0.0200396	-0.0182572	-0.0126703	-0.00699481	-0.0134315
DeltaDistanceFromCenter	SS49755	20xUAS-CsChrimson-mVenus-attP18	6xLED020-10s-NoOdor-0mLAir	AirLED	olfactoryArena1	Cam0	20220420T193637	6	-0.0023913	-0.00922967	-0.00598043	-0.00665068	-0.0116497	-0.00482901	0.00203548	0.00151372	-0.00245076	-0.0014679	0.00150736	-0.00306134	-0.0095608	-0.0166446	-0.0227298	-0.0363733	-0.0478492	-0.050612	-0.0519603	-0.0496699	-0.0462247	-0.0386309	-0.0381585	-0.0410868	-0.0374987	-0.0335314	-0.0301646	-0.0214401	-0.010451	0	0.0120707	0.0228225	0.0157735	0.00781911	-4.806e-05	-0.00147848	0.00389597	0.0215694	0.0305795	0.0331913	0.0274862
DeltaDistanceFromCenter	SS49755	20xUAS-CsChrimson-mVenus-attP18	6xLED020-10s-NoOdor-0mLAir	AirLED	olfactoryArena1	Cam0	20220430T020654	6	0.0148445	0.00969486	0.002765	-0.00738724	-0.0153674	-0.0152317	-0.0141722	-0.01339	-0.0117126	-0.00707716	-0.00274611	-0.00264472	-0.0102868	-0.0179551	-0.0251085	-0.0239477	-0.0182409	-0.015741	-0.0110941	-0.0026786	0.0028065	-5.269e-06	-0.00628361	-0.00431144	-0.00623496	-0.00251738	0.00162001	0.00197187	0.00559629	0	-0.00925062	-0.00771802	-0.0152239	-0.025445	-0.0385789	-0.0500961	-0.055927	-0.0566927	-0.0567746	-0.0550115	-0.0546512
DeltaDistanceFromCenter	SS49755	20xUAS-CsChrimson-mVenus-attP18	6xLED020-10s-NoOdor-0mLAir	AirLED	olfactoryArena1	Cam0	20220430T021441	6	-0.0513301	-0.0502533	-0.0539414	-0.0517834	-0.046207	-0.0516859	-0.055187	-0.0556684	-0.0539848	-0.0482185	-0.0443954	-0.0418967	-0.0389266	-0.0319421	-0.0252131	-0.0236583	-0.024619	-0.0277268	-0.0248099	-0.0239122	-0.0237114	-0.0249571	-0.0279625	-0.030553	-0.0309607	-0.0270149	-0.0180852	-0.00959319	-0.00382944	0	-0.00348117	-0.00896528	-0.0237058	-0.029882	-0.0274061	-0.025506	-0.0264134	-0.032409	-0.04239	-0.0403843	-0.0315691
DeltaDistanceFromCenter	SS49755	20xUAS-CsChrimson-mVenus-attP18	6xLED020-10s-NoOdor-0mLAir	AirLED	olfactoryArena1	Cam0	20220430T023244	6	-0.0569242	-0.0502138	-0.0404847	-0.0330191	-0.0337885	-0.0393573	-0.0411324	-0.0384405	-0.04102	-0.0417522	-0.0329794	-0.0272982	-0.0273267	-0.0230523	-0.0164273	-0.0125157	-0.00847854	-0.00637628	-0.000942301	0.00566515	0.00595474	0.00377901	0.00704663	0.00661652	0.0042773	0.00329732	0.00326931	0.00446895	0.00263369	0	-0.00160317	0.00444576	0.00188468	-0.00255069	-0.00427218	-0.00660898	-0.00743193	-0.00379487	0.00800464	0.0186368	0.0212182
DeltaDistanceFromCenter	SS49755	20xUAS-CsChrimson-mVenus-attP18	6xLED020-10s-NoOdor-0mLAir	AirLED	olfactoryArena1	Cam1	20220413T213218	6	-0.00240699	-0.0126412	-0.0206949	-0.0243983	-0.0217053	-0.0194237	-0.0156317	-0.0213028	-0.0278504	-0.0254911	-0.0151927	-0.00074486	0.015196	0.0247491	0.0302876	0.0395545	0.0426932	0.0375504	0.0304174	0.0248268	0.0260866	0.0262218	0.0187937	0.0134687	0.0158258	0.0194287	0.0188092	0.0131821	0.00678562	0	-0.00275931	-0.00707516	-0.0130722	-0.0204543	-0.0212071	-0.0142585	-0.00623206	0.00269535	0.00467181	-0.00431264	-0.00588437
DeltaDistanceFromCenter	SS49755	20xUAS-CsChrimson-mVenus-attP18	6xLED020-10s-NoOdor-0mLAir	AirLED	olfactoryArena1	Cam1	20220413T213516	6	0.0103148	0.00965992	0.00737033	-0.00166193	-0.016461	-0.0252512	-0.0346753	-0.0419778	-0.0478964	-0.0505541	-0.0477723	-0.0420893	-0.0388405	-0.0402422	-0.0477309	-0.0542478	-0.0506908	-0.0432011	-0.03085	-0.0247242	-0.0250226	-0.0263958	-0.0210145	-0.0103832	-0.00349224	0.00591189	0.0141565	0.00815564	0.00289616	0	-0.00227701	-0.00700807	-0.00836943	-0.00427041	-0.00446828	0.00195806	0.00477594	-0.00537933	-0.0135492	-0.0212075	-0.0401201
DeltaDistanceFromCenter	SS49755	20xUAS-CsChrimson-mVenus-attP18	6xLED020-10s-NoOdor-0mLAir	AirLED	olfactoryArena1	Cam1	20220413T214715	6	-0.00127386	-0.00298843	0.00156896	0.0110632	0.0133509	0.0151817	0.0117465	0.0135042	0.0180516	0.0150696	0.00740391	0.00423096	0.00527801	0.00998665	0.0155457	0.0210764	0.0270121	0.0309316	0.0359782	0.0408967	0.0425604	0.0408684	0.0422001	0.0428396	0.0410753	0.0404752	0.0349658	0.021188	0.0134177	0	-0.0160603	-0.0229644	-0.0263902	-0.0283597	-0.0252531	-0.020438	-0.025767	-0.03344	-0.0342831	-0.0296235	-0.0311265
DeltaDistanceFromCenter	SS49755	20xUAS-CsChrimson-mVenus-attP18	6xLED020-10s-NoOdor-0mLAir	AirLED	olfactoryArena1	Cam1	20220413T215052	6	-0.00449654	-0.000387663	0.00329633	0.00310408	0.00273777	-0.00315907	-0.00923239	-0.00946199	-0.00481063	-0.00510617	-0.00842566	-0.00775229	-0.00369591	-0.00234483	-0.000276744	0.00476989	0.00790651	0.0102822	0.01337	0.0123233	-0.00879168	-0.0104708	-0.0112541	-0.0075099	-0.00745417	-0.0114803	-0.0140454	-0.0105494	-0.00360322	0	0.00615909	0.00398355	-0.000107887	-0.00146796	-0.0010584	0.00250887	0.00846955	0.00392477	0.00508768	0.00976847	0.0161327
DeltaDistanceFromCenter	SS49755	20xUAS-CsChrimson-mVenus-attP18	6xLED020-10s-NoOdor-0mLAir	AirLED	olfactoryArena1	Cam1	20220413T220431	6	0.00251254	0.00610967	0.00614639	0.00751112	0.00683517	0.0102365	0.0124006	0.0120343	0.0118314	0.00996899	0.00792523	0.00866611	0.00830002	0.00557878	0.0033097	0.00523764	0.0100233	0.0119617	0.0118539	0.0106125	0.0108389	0.00819785	0.00184659	0.000618876	-0.00053315	0.000398355	0.00320075	0.000466228	-0.000362945	0	-0.00717949	-0.0132464	-0.0232958	-0.0268939	-0.0301848	-0.0339652	-0.0319314	-0.0329569	-0.0383756	-0.0376731	-0.0241004
DeltaDistanceFromCenter	SS49755	20xUAS-CsChrimson-mVenus-attP18	6xLED020-10s-NoOdor-0mLAir	AirLED	olfactoryArena1	Cam1	20220418T162324	6	-0.0497201	-0.0487692	-0.0484801	-0.04586	-0.0436257	-0.0441745	-0.0428431	-0.0434504	-0.0458642	-0.0481743	-0.0483569	-0.0495694	-0.0485913	-0.0406226	-0.0324029	-0.0341284	-0.0386447	-0.037739	-0.0363843	-0.0347731	-0.0345621	-0.0359206	-0.0325755	-0.0245167	-0.0176471	-0.010883	-0.00557846	-0.00190778	-0.000670866	0	-0.00404541	-0.00438442	0.00308634	0.0139181	0.0203701	0.0174548	0.0178743	0.0241038	0.0293646	0.0257804	0.0223944
DeltaDistanceFromCenter	SS49755	20xUAS-CsChrimson-mVenus-attP18	6xLED020-10s-NoOdor-0mLAir	AirLED	olfactoryArena1	Cam1	20220418T163823	6	-0.0590978	-0.052143	-0.0491697	-0.0454379	-0.0385175	-0.0363752	-0.0315076	-0.0255936	-0.0195656	-0.0177761	-0.0123127	-0.00170331	0.00865981	0.0101651	0.00763665	0.0018099	-0.0034807	-0.00707426	-0.0135938	-0.0187606	-0.0237942	-0.024337	-0.0213681	-0.0178866	-0.0167031	-0.0155735	-0.0131891	-0.0123043	-0.0056519	0	0.00152215	0.00833893	0.0155017	0.0135686	0.00457286	-0.004316	-0.00555405	0.000722273	0.00324346	-0.000801078	-0.00592775
DeltaDistanceFromCenter	SS49755	20xUAS-CsChrimson-mVenus-attP18	6xLED020-10s-NoOdor-0mLAir	AirLED	olfactoryArena1	Cam1	20220418T164101	6	-0.00769582	-0.00010372	0.00347102	0.00729159	0.011977	0.0171275	0.0235092	0.0271592	0.0295598	0.0289757	0.0245823	0.022865	0.019086	0.0196403	0.023168	0.0294686	0.0323211	0.0323114	0.0301159	0.0284765	0.0238465	0.0208913	0.0135339	0.00445223	-0.00576303	-0.0117625	-0.0166128	-0.0154337	-0.00724346	0	0.00403917	0.000933681	0.000754264	-0.00159293	-0.00321714	-0.0058466	-0.012923	-0.0102508	-0.00505221	0.0107182	0.0192674
DeltaDistanceFromCenter	SS49755	20xUAS-CsChrimson-mVenus-attP18	6xLED020-10s-NoOdor-0mLAir	AirLED	olfactoryArena1	Cam1	20220418T165551	6	-0.06596	-0.061052	-0.0531492	-0.0437735	-0.0310143	-0.0238625	-0.0231435	-0.0254878	-0.0272993	-0.0260441	-0.0275886	-0.0320293	-0.0327743	-0.0366517	-0.0409013	-0.0427187	-0.0397842	-0.034848	-0.0314487	-0.0299089	-0.0255108	-0.0212776	-0.0158422	-0.00746027	0.00357162	0.00812384	0.00973393	0.00671943	0.00132749	0	-0.000534269	0.000227259	-0.00322716	-0.00895715	-0.0118114	-0.0162327	-0.0230936	-0.0262488	-0.0280051	-0.0324901	-0.0338246
DeltaDistanceFromCenter	SS49755	20xUAS-CsChrimson-mVenus-attP18	6xLED020-10s-NoOdor-0mLAir	AirLED	olfactoryArena1	Cam1	20220418T165822	6	0.00145604	0.00281045	0.00993151	0.0198311	0.0217746	0.0188125	0.0188604	0.0139867	0.00826764	0.0107104	0.0162231	0.0177348	0.0134776	0.0142679	0.0141036	0.00937257	0.00469372	0.00352375	0.00782738	0.0111473	0.0125673	0.0174346	0.0255989	0.0194913	0.0106464	0.011311	0.0102027	0.00989115	0.00841892	0	-0.0147863	-0.0251834	-0.0288642	-0.0261519	-0.0198704	-0.0147268	-0.0114024	-0.0116739	-0.0195693	-0.0216001	-0.0217507
DeltaDistanceFromCenter	SS49755	20xUAS-CsChrimson-mVenus-attP18	6xLED020-10s-NoOdor-0mLAir	AirLED	olfactoryArena1	Cam1	20220420T191005	6	-0.00614029	0.0112114	0.0181377	0.013141	0.00792041	0.00210267	-0.00844397	-0.0165647	-0.0162119	-0.0136123	-0.00484186	0.00612782	0.01563	0.0215738	0.0247424	0.0280262	0.0328772	0.0323053	0.0273568	0.0238778	0.021561	0.0222487	0.0235912	0.0135137	0.00902481	0.00170731	-0.00108701	0.000833907	0.00272909	0	0.00140457	0.0101241	0.0127352	0.00755779	-0.00654519	-0.0205486	-0.0293314	-0.0266186	-0.0194329	-0.025238	-0.0380667
DeltaDistanceFromCenter	SS49755	20xUAS-CsChrimson-mVenus-attP18	6xLED020-10s-NoOdor-0mLAir	AirLED	olfactoryArena1	Cam1	20220420T191613	6	-0.0101525	-0.00754257	-0.000721132	0.00834238	0.0158518	0.0245192	0.0332807	0.0394289	0.0374539	0.0300445	0.0256174	0.0231069	0.0178556	0.0109684	0.00194155	0.0126326	0.024158	0.0254765	0.0310035	0.0305069	0.0273893	0.0210438	0.0185548	0.0146593	0.00996241	0.00175311	-0.00551066	-0.00959933	-0.00556358	0	0.000804945	-0.0055931	-0.00183178	-0.00277579	-0.00888182	-0.0195404	-0.0307081	-0.029656	-0.0209779	-0.0100595	-0.00710573
DeltaDistanceFromCenter	SS49755	20xUAS-CsChrimson-mVenus-attP18	6xLED020-10s-NoOdor-0mLAir	AirLED	olfactoryArena1	Cam1	20220420T193039	6	-0.0900523	-0.0832516	-0.078075	-0.0718594	-0.062232	-0.0520892	-0.041083	-0.0317817	-0.028963	-0.0253761	-0.0224618	-0.0198046	-0.0243527	-0.0278717	-0.0256589	-0.026527	-0.0300802	-0.0278413	-0.0237818	-0.0224835	-0.0242692	-0.0272966	-0.0250052	-0.0221773	-0.0190641	-0.0161751	-0.00781765	-0.00732946	-0.00666118	0	0.00843562	0.0171328	0.0202165	0.0197399	0.0204818	0.0237985	0.019653	0.0105009	0.00457615	-0.00374075	-0.0143465
DeltaDistanceFromCenter	SS49755	20xUAS-CsChrimson-mVenus-attP18	6xLED020-10s-NoOdor-0mLAir	AirLED	olfactoryArena1	Cam1	20220420T193637	6	-0.00506118	0.00346033	0.00987672	0.0124304	0.0172058	0.0217783	0.0298344	0.0313714	0.0322304	0.0345728	0.0399118	0.0339217	0.0280147	0.0194304	0.0102496	0.00612031	0.00434073	-0.0014423	-0.00824337	-0.0112075	-0.0103406	-0.0154936	-0.0159081	-0.0168825	-0.0161943	-0.0131782	-0.0104836	-0.0119031	-0.0104988	0	0.0122209	0.0096556	0.0125193	0.012577	0.00702514	-0.00522763	-0.0155244	-0.0234127	-0.0278476	-0.0220515	-0.0169174
DeltaDistanceFromCenter	SS49755	20xUAS-CsChrimson-mVenus-attP18	6xLED020-10s-NoOdor-0mLAir	AirLED	olfactoryArena1	Cam1	20220430T020654	6	0.0067279	-0.00073793	0.00345895	0.00594424	0.00691645	0.0099679	0.0195143	0.021648	0.0304085	0.0275584	0.0274464	0.0318894	0.0312424	0.0204698	0.0132977	0.00746402	0.00367749	0.0033006	0.00337347	0.000287283	0.00216688	-0.000776582	-0.00740785	-0.0135188	-0.0116001	-0.00654516	-0.00270229	-0.000436685	0.00157789	0	0.00249571	-0.000638822	-0.00910145	-0.0179338	-0.0209977	-0.0261598	-0.0249752	-0.0263636	-0.0115515	-0.00417524	-0.00146105
DeltaDistanceFromCenter	SS49755	20xUAS-CsChrimson-mVenus-attP18	6xLED020-10s-NoOdor-0mLAir	AirLED	olfactoryArena1	Cam1	20220430T021441	6	-0.0856492	-0.0810878	-0.0751521	-0.0682412	-0.0660988	-0.0636099	-0.0571687	-0.0478872	-0.0395416	-0.0320861	-0.0306045	-0.0305948	-0.0317053	-0.0317187	-0.0292325	-0.0275446	-0.0283579	-0.0279569	-0.0281265	-0.0207876	-0.0172247	-0.00920707	-0.0084133	-0.00677066	-0.00602938	-0.00135687	0.00469811	0.00527026	0.00130443	0	-0.00383104	-0.00937726	-0.0110154	-0.0193787	-0.0255866	-0.0336092	-0.0349338	-0.0384968	-0.0392569	-0.0396442	-0.0332601
DeltaDistanceFromCenter	SS49755	20xUAS-CsChrimson-mVenus-attP18	6xLED020-10s-NoOdor-0mLAir	AirLED	olfactoryArena1	Cam1	20220430T022357	6	-0.0238186	-0.0340542	-0.0303399	-0.0148743	-0.0216097	-0.0164197	-0.0136696	-0.00790299	0.00187382	-0.00341757	0.00512947	0.00451373	0.000282199	0.00956777	0.00639108	-0.00408743	0.00259522	-0.00175423	-0.0155071	-0.0251942	-0.0265741	-0.0289312	-0.0281507	-0.018078	-0.0103076	-0.00887895	-0.00519652	-0.00102953	0.00608595	0	-0.00533517	0.00183433	0.00477631	0.0196044	0.0259307	0.042504	0.0388318	0.0382178	0.0466225	0.0414938	0.0247731
DeltaDistanceFromCenter	SS49755	20xUAS-CsChrimson-mVenus-attP18	6xLED020-10s-NoOdor-0mLAir	AirLED	olfactoryArena1	Cam1	20220430T023244	6	0.0124526	-0.00221553	-0.013346	-0.017181	-0.0245667	-0.0293003	-0.0261165	-0.0253589	-0.0197295	-0.0103534	-0.0041941	0.00279834	0.00866084	0.0154147	0.0174661	0.0180092	0.022631	0.0205664	0.0189724	0.0111567	0.00517543	0.00331186	0.002024	-0.0030687	-0.000434244	0.00466597	0.00858426	0.00560061	0.00111874	0	-0.00484672	-0.0109524	-0.0226015	-0.0252877	-0.0283364	-0.0311338	-0.0343452	-0.0465434	-0.0491108	-0.0567158	-0.0688678
DeltaDistanceFromCenter	SS49755	20xUAS-CsChrimson-mVenus-attP18	6xLED020-10s-NoOdor-0mLAir	AirLED	olfactoryArena1	Cam0	20220430T022357	5	-0.059437	-0.0494857	-0.0448989	-0.0366439	-0.0284346	-0.0243294	-0.0151388	-0.00282628	0.00508949	0.0038698	0.00292789	0.00977348	0.0141509	0.0124037	0.0129779	0.0127973	0.00604111	0.0022385	0.00275017	0.00842818	0.020695	0.0214531	0.0106201	0.00291841	-0.00571931	-0.00735985	-0.00356959	0.00069611	-0.000842829	0	0.00222113	0.00197962	-0.000954143	-0.00728158	-0.0113344	-0.0118229	-0.0151811	-0.019495	-0.0276021	-0.0391079	-0.0366825
DeltaDistanceFromCenter	SS49755	20xUAS-CsChrimson-mVenus-attP18	6xLED020-10s-NoOdor-0mLAir	AirLED	olfactoryArena1	Cam0	20220418T165551	4	-0.0745725	-0.0738976	-0.0772575	-0.0736358	-0.0670956	-0.0584066	-0.0509779	-0.04639	-0.0452691	-0.0493195	-0.0602181	-0.0583697	-0.0503157	-0.04673	-0.0454211	-0.0462582	-0.0455309	-0.0524671	-0.0551923	-0.0571175	-0.0589199	-0.0555483	-0.0455651	-0.0388262	-0.0351147	-0.0319307	-0.0225159	-0.00988454	-0.00218507	0	0.00845554	0.0139873	0.0179968	0.0191768	0.0215157	0.0227809	0.0245613	0.0232188	0.0154237	0.00785285	-0.00152335
Cos(Upwind)	SS49755	20xUAS-CsChrimson-mVenus-attP18	6xLED020-10s-NoOdor-0mLAir	AirLED	olfactoryArena1	Cam0	20220413T213218	6	-0.0486532	-0.0173456	0.0127135	0.0432145	0.0399109	0.0657886	0.101877	0.0979236	0.0546141	0.00497882	-0.0201615	-0.00619068	0.00997204	0.0339707	0.0775327	0.0518701	0.0122272	-0.000560408	0.0235716	-0.0251127	-0.017871	-0.00738317	-0.0175849	0.0854516	0.0622973	0.0308315	0.0503938	0.065921	0.0259345	0.0381914	0.0239114	0.086946	0.142127	0.0593868	-0.0181609	-0.0104488	0.0301549	0.0938704	0.149032	0.047245	-0.02837
Cos(Upwind)	SS49755	20xUAS-CsChrimson-mVenus-attP18	6xLED020-10s-NoOdor-0mLAir	AirLED	olfactoryArena1	Cam0	20220413T213516	6	-0.109748	-0.0921971	-0.130666	-0.100194	-0.0788363	-0.0955495	-0.156293	-0.146462	-0.160474	-0.155752	-0.127183	-0.134722	-0.105808	-0.0635542	-0.0738268	-0.114053	-0.0658421	-0.0124134	0.00545499	0.0537997	0.0907737	0.0457293	0.0142459	0.0492957	0.0506143	0.0799227	0.0576789	0.0376667	0.0525328	0.0735379	0.0480587	-0.0184652	-0.0431952	-0.0353338	0.0019718	0.0833743	0.0783578	0.0251517	-0.0309206	0.0427981	0.0541166
Cos(Upwind)	SS49755	20xUAS-CsChrimson-mVenus-attP18	6xLED020-10s-NoOdor-0mLAir	AirLED	olfactoryArena1	Cam0	20220413T214715	6	0.04085	0.115603	0.139271	0.108705	0.0881589	0.137786	0.0950066	0.0626512	0.060291	0.0853379	0.0808516	0.0726211	0.0653293	0.0485074	0.10843	0.137689	0.121936	0.117521	0.131708	0.114374	0.128965	0.0687162	0.0630192	0.0581375	0.0790857	0.133466	0.157951	0.209311	0.241075	0.23972	0.16418	0.136245	0.165417	0.163102	0.184973	0.166029	0.0994152	0.0582292	0.0641266	0.0653899	0.0303115
Cos(Upwind)	SS49755	20xUAS-CsChrimson-mVenus-attP18	6xLED020-10s-NoOdor-0mLAir	AirLED	olfactoryArena1	Cam0	20220413T215052	6	-0.168266	-0.134391	-0.0980766	-0.137811	-0.14747	-0.140199	-0.114464	-0.0809352	-0.122352	-0.146742	-0.142327	-0.159613	-0.188578	-0.147797	-0.149288	-0.137793	-0.0889809	-0.0722736	-0.0633027	-0.0621669	-0.0950472	-0.107963	-0.075553	-0.0526397	-0.0366026	-0.0235968	-0.058435	-0.0256937	-0.0570795	-0.0690175	-0.017589	0.0386304	0.0707849	0.0674213	0.0245603	0.0295974	0.0198834	0.0335471	0.00452401	0.00346202	-0.0343968
Cos(Upwind)	SS49755	20xUAS-CsChrimson-mVenus-attP18	6xLED020-10s-NoOdor-0mLAir	AirLED	olfactoryArena1	Cam0	20220413T220431	6	-0.0378238	-0.00820269	-0.0275112	0.0107638	0.0309951	0.010853	0.0492461	0.0453277	0.00607418	-0.00533283	-0.00286554	-0.00924711	-0.00483006	-0.026324	-0.0336364	-0.00679261	-0.0232998	-0.0229422	-0.0371056	-0.0558143	-0.0206288	-0.0312793	-0.0414426	-0.0119519	-0.00493471	-0.0111769	-0.0062381	0.0376788	0.0075595	-0.062681	-0.0313971	0.0424262	0.123511	0.0626047	0.0312145	0.0383305	0.0451252	0.00133154	-0.0461334	0.00526768	0.0349889
Cos(Upwind)	SS49755	20xUAS-CsChrimson-mVenus-attP18	6xLED020-10s-NoOdor-0mLAir	AirLED	olfactoryArena1	Cam0	20220418T162324	6	-0.0167607	0.0505091	0.126625	0.0963865	0.0598258	0.0606319	0.0945278	0.117975	0.106019	0.11073	0.0624465	0.0354258	0.00253696	0.00853775	0.0230692	-0.00704258	0.0067815	-0.00333786	0.0281797	0.0372883	0.0307762	0.0741409	0.0668571	0.0770825	0.121127	0.136947	0.07536	0.0416182	0.0712879	0.0835966	0.0497033	0.0712332	0.0926446	0.0778612	0.0598391	0.0374892	0.0593681	0.111424	0.184374	0.188582	0.130396
Cos(Upwind)	SS49755	20xUAS-CsChrimson-mVenus-attP18	6xLED020-10s-NoOdor-0mLAir	AirLED	olfactoryArena1	Cam0	20220418T163823	6	0.0122763	0.0688809	0.0759517	0.0962648	0.0870676	0.0917784	0.0838674	0.0778439	0.0549389	0.0185653	0.0543013	0.0709714	0.0609552	0.0775095	0.100119	0.0559724	0.0899071	0.0970582	0.0586994	0.0451894	0.0775517	0.105414	0.0858313	0.041905	0.0317619	0.0739005	0.0984545	0.054803	0.0366911	0.0160651	0.022494	0.00561524	-0.0155009	0.00355416	0.0483725	0.11534	0.1385	0.0900465	0.051995	0.0808842	0.0455136
Cos(Upwind)	SS49755	20xUAS-CsChrimson-mVenus-attP18	6xLED020-10s-NoOdor-0mLAir	AirLED	olfactoryArena1	Cam0	20220418T164101	6	-0.06212	-0.000850657	0.0272459	0.00869359	0.0111945	0.0180468	0.0022421	0.0431523	0.0950866	0.103934	0.106849	0.162606	0.122523	0.106827	0.115795	0.115334	0.107525	0.147652	0.113068	0.0845779	0.05729	0.0544526	0.0481179	0.0388794	0.137569	0.183047	0.135188	0.164106	0.142121	0.160591	0.143695	0.112605	0.135545	0.0980755	0.0675374	0.112548	0.106502	0.0901743	0.0247102	-0.0138809	-0.0296981
Cos(Upwind)	SS49755	20xUAS-CsChrimson-mVenus-attP18	6xLED020-10s-NoOdor-0mLAir	AirLED	olfactoryArena1	Cam0	20220418T165822	6	0.0101852	0.0526208	0.0627817	0.0592176	0.0996618	0.10082	0.0883888	0.0683205	0.0351875	0.044559	0.132949	0.171633	0.169818	0.105402	0.093177	0.117128	0.109995	0.171656	0.168249	0.137332	0.163817	0.191826	0.123477	0.0993206	0.0533691	0.00571847	0.0415857	0.0215607	-0.0265033	-0.0268659	0.0153191	0.0238949	-0.00530465	0.0261302	0.0907498	0.0815287	0.0426626	0.0439949	0.0163712	0.040138	0.0849964
Cos(Upwind)	SS49755	20xUAS-CsChrimson-mVenus-attP18	6xLED020-10s-NoOdor-0mLAir	AirLED	olfactoryArena1	Cam0	20220420T191005	6	-0.0434076	0.0238084	0.0620035	0.0694721	0.000729764	-0.0138112	0.042816	0.0320724	0.00469465	0.0237801	0.00512663	0.0121122	-0.00342118	0.0546907	0.0272891	0.0100966	-0.0123744	-0.00447413	0.0201947	0.0595812	0.111862	0.0550531	0.00410083	0.0189471	0.0470502	0.0654134	0.0529209	0.0365875	0.0677978	0.0936469	0.0330455	0.0279468	0.0209415	-0.0105626	-0.0740204	-0.0654837	-0.0964908	-0.0869424	-0.0410999	-0.0190814	0.010361
Cos(Upwind)	SS49755	20xUAS-CsChrimson-mVenus-attP18	6xLED020-10s-NoOdor-0mLAir	AirLED	olfactoryArena1	Cam0	20220420T191613	6	0.107643	0.136479	0.137795	0.111783	0.0557229	0.0585883	0.0594447	0.0700416	0.108412	0.11692	0.153273	0.190813	0.191117	0.200798	0.163424	0.114818	0.113622	0.139131	0.0897017	0.0663148	0.0735515	0.083854	0.0657433	0.0441106	0.0785242	0.0736129	0.0394833	0.0512909	0.0549314	0.0451579	0.0585564	0.0671289	0.100532	0.0736715	0.0135694	0.00297807	0.0605473	0.0957268	0.0360946	0.0475251	0.0988143
Cos(Upwind)	SS49755	20xUAS-CsChrimson-mVenus-attP18	6xLED020-10s-NoOdor-0mLAir	AirLED	olfactoryArena1	Cam0	20220420T193039	6	-0.0772844	0.00239189	0.0233159	-0.00490786	-0.0531495	-0.00126864	0.0296712	0.045308	0.00280064	-0.0192948	-0.0144464	-0.000145715	0.00891781	-0.0433744	-0.0052699	0.0103055	0.015786	-0.0202064	-0.0625407	-0.0135595	-0.00997083	0.0327817	0.051603	0.0727705	0.00334337	0.00121785	0.000208162	-0.0331635	-0.0912467	-0.123906	-0.100526	-0.0915342	-0.0582785	-0.0277287	0.0335544	0.0569278	0.0171168	0.0465886	0.0589941	0.0404742	0.0340169
Cos(Upwind)	SS49755	20xUAS-CsChrimson-mVenus-attP18	6xLED020-10s-NoOdor-0mLAir	AirLED	olfactoryArena1	Cam0	20220420T193637	6	-0.0645495	-0.0582784	-0.0180313	-0.0563567	-0.0569647	-0.02658	-0.0376256	-0.0309612	-0.0268476	-0.0150351	-0.0126749	-0.0684064	-0.0809413	-0.0729827	-0.0713406	-0.106718	-0.0795356	-0.0581326	-0.0446082	-0.00690683	-0.01356	0.0236183	-0.0378282	-0.0165714	0.0198461	0.0435172	0.0353527	0.029618	0.0393017	0.0462223	0.0539733	0.0454682	0.0450928	0.0314906	0.028186	0.0512853	0.133204	0.170933	0.101487	-0.00607568	-0.0351068
Cos(Upwind)	SS49755	20xUAS-CsChrimson-mVenus-attP18	6xLED020-10s-NoOdor-0mLAir	AirLED	olfactoryArena1	Cam0	20220430T020654	6	-0.0952027	-0.0781935	-0.0586087	-0.114962	-0.116136	-0.0171334	-0.0781789	-0.0881981	-0.0416549	-0.0183689	-0.0287501	-0.0241391	-0.0745504	-0.0834879	-0.0625351	-0.00914104	0.00275698	-0.0204692	0.00686138	0.0275841	0.0190385	-0.0606762	-0.0268806	0.00096203	-0.0278062	0.0526235	0.0311015	0.0462206	0.0530924	-0.0646305	-0.0262956	0.0472928	0.0304196	0.0228435	0.00424329	0.0498856	0.032491	0.0257539	0.0446891	0.050466	0.0148664
Cos(Upwind)	SS49755	20xUAS-CsChrimson-mVenus-attP18	6xLED020-10s-NoOdor-0mLAir	AirLED	olfactoryArena1	Cam0	20220430T021441	6	-0.23348	-0.196151	-0.197819	-0.11124	-0.131524	-0.216092	-0.207848	-0.184477	-0.143157	-0.135023	-0.111226	-0.14706	-0.140114	-0.0876532	-0.0610859	-0.0648635	-0.0703359	-0.0859022	-0.0967318	-0.134132	-0.139064	-0.13376	-0.124579	-0.120416	-0.127661	-0.088775	-0.0472854	-0.0812144	-0.106705	-0.138068	-0.133621	-0.0810997	-0.0283234	-0.0072626	-0.0234422	-0.0101468	-0.0100399	-0.123694	-0.109777	0.0488724	0.068034
Cos(Upwind)	SS49755	20xUAS-CsChrimson-mVenus-attP18	6xLED020-10s-NoOdor-0mLAir	AirLED	olfactoryArena1	Cam0	20220430T023244	6	-0.0404045	-0.00555766	0.00662779	0.00740345	-0.0243241	-0.0322924	0.000904765	0.0112088	-0.0431466	-0.0421526	-0.0195405	-0.0665206	-0.0815872	0.00587992	-0.00156125	-0.00918648	-0.0170818	-0.0301361	-0.00228276	-0.0234689	-0.095202	-0.103776	-0.0858819	-0.0911386	-0.0778494	-0.0862223	-0.0383227	-0.0181878	-0.0427345	-0.0341044	-0.0149649	0.00192199	0.0300891	0.0411043	0.0316542	-0.00636336	0.0124666	0.110617	0.165793	0.0741581	0.0178414
Cos(Upwind)	SS49755	20xUAS-CsChrimson-mVenus-attP18	6xLED020-10s-NoOdor-0mLAir	AirLED	olfactoryArena1	Cam1	20220413T213218	6	-0.0243987	-0.0421528	-0.0446718	-0.0304517	-0.0300121	-0.00983588	-0.0179199	-0.0538609	-0.0325652	0.058249	0.0895834	0.118472	0.101535	0.0839879	0.0864729	0.101358	0.0117716	0.000878924	-0.00444182	0.0022964	0.0503306	0.0178206	-0.0133337	-0.00112226	0.0397482	0.0227121	0.0163599	-0.0382161	0.000287665	-0.0145283	0.0349645	0.0650608	0.0307772	0.0508143	0.0861461	0.110624	0.104844	0.113501	0.0642118	0.00179576	0.0823202
Cos(Upwind)	SS49755	20xUAS-CsChrimson-mVenus-attP18	6xLED020-10s-NoOdor-0mLAir	AirLED	olfactoryArena1	Cam1	20220413T213516	6	0.00759101	-0.0219119	-0.0410564	-0.132712	-0.138012	-0.14104	-0.13918	-0.0711048	-0.0696617	-0.0384867	-0.0199431	-0.00427715	0.0163007	0.00123904	-0.0199386	-0.0020576	0.0106355	0.0410707	0.0698027	0.0206646	0.0153077	-0.048652	0.0403419	0.0443249	0.0182528	0.043979	0.075405	-0.00709449	0.029586	-0.00954906	-0.00889315	0.0569101	0.144171	0.159849	0.11721	0.148306	0.0865093	0.0340227	0.0298425	-0.0207776	-0.0597075
Cos(Upwind)	SS49755	20xUAS-CsChrimson-mVenus-attP18	6xLED020-10s-NoOdor-0mLAir	AirLED	olfactoryArena1	Cam1	20220413T214715	6	-0.00586725	0.0242563	0.104607	0.0814067	0.0237211	0.0428261	0.0349284	0.0401412	0.0477257	-0.0141534	0.0142447	0.055621	0.0653665	0.0412391	0.0504643	0.0216692	0.0259306	0.0135685	0.03203	0.025492	-0.0245358	-0.0188073	-0.0258674	-0.0517608	-0.0515692	-0.0365738	-0.0757502	-0.0826562	-0.0774976	-0.125897	-0.0715999	-0.0418912	-0.01149	0.0168587	0.0707531	0.0495851	-0.0515733	-0.0667782	-0.0321464	0.0197276	-0.0634119
Cos(Upwind)	SS49755	20xUAS-CsChrimson-mVenus-attP18	6xLED020-10s-NoOdor-0mLAir	AirLED	olfactoryArena1	Cam1	20220413T215052	6	0.0102459	0.0323072	-0.0250254	-0.0180004	-0.0312352	-0.052005	-0.059239	-0.045129	-0.0387621	-0.0667598	-0.0636204	-0.0464881	-0.00724484	-0.00663695	0.00548381	0.0308553	0.0114674	0.0229265	-0.0106657	-0.0101191	0.00647797	-0.0193726	-0.03244	0.0122269	0.0216092	0.00390478	0.0289643	0.0701482	0.107793	0.137806	0.102766	0.0932498	0.0491577	0.0564025	0.0702843	0.11315	0.0732034	-0.0569117	-0.0279697	0.00769058	-0.030901
Cos(Upwind)	SS49755	20xUAS-CsChrimson-mVenus-attP18	6xLED020-10s-NoOdor-0mLAir	AirLED	olfactoryArena1	Cam1	20220413T220431	6	-0.01904	0.00166129	0.0208235	0.00915664	0.00360942	0.00645484	0.0054317	-0.0174347	-0.0285062	-0.0326792	-0.0264557	-0.00703044	0.0143183	0.0279256	0.0427736	0.0475497	0.0335986	0.00301053	-0.0223529	-0.0428561	-0.0191829	-0.0259448	-0.0540876	-0.0637988	-0.0423144	-0.00729126	-0.0286803	-0.0227614	-0.0235868	-0.0577873	-0.0409547	-0.0573124	-0.0627162	-0.026638	-0.0129787	-0.000702979	0.0310016	0.00988447	0.00293274	0.00672398	0.0588625
Cos(Upwind)	SS49755	20xUAS-CsChrimson-mVenus-attP18	6xLED020-10s-NoOdor-0mLAir	AirLED	olfactoryArena1	Cam1	20220418T162324	6	0.0137238	-0.0126046	-0.00737747	0.0347475	0.0242695	-0.00745598	0.0389198	0.0415622	0.0235556	0.0101661	0.0197167	0.0145202	0.00583044	0.0279996	0.0422035	-0.00484247	0.0145418	0.0544422	0.0437068	0.0613685	0.0776362	0.0809364	0.13045	0.132354	0.149342	0.130936	0.135463	0.142137	0.122244	0.0995553	0.0720162	0.107643	0.205403	0.208939	0.142646	0.0582746	0.0560798	0.126955	0.124777	0.0451068	0.0114166
Cos(Upwind)	SS49755	20xUAS-CsChrimson-mVenus-attP18	6xLED020-10s-NoOdor-0mLAir	AirLED	olfactoryArena1	Cam1	20220418T163823	6	0.0974888	0.182588	0.169512	0.119519	0.121705	0.0999422	0.0984127	0.102245	0.0961462	0.0813846	0.133758	0.185539	0.162261	0.124377	0.0814608	0.0301049	0.0680724	0.0729531	0.0470058	0.0410923	0.0612299	0.114542	0.148781	0.130256	0.0848219	0.0969749	0.0925652	0.118801	0.150468	0.0839202	0.095895	0.176019	0.178763	0.094199	0.00884862	0.00128916	0.0658101	0.0804937	0.0749626	-0.0063787	0.0196737
Cos(Upwind)	SS49755	20xUAS-CsChrimson-mVenus-attP18	6xLED020-10s-NoOdor-0mLAir	AirLED	olfactoryArena1	Cam1	20220418T164101	6	0.0435556	0.0355674	0.00473207	0.0267618	0.0587058	0.0848719	0.0686548	0.0593137	0.0534758	0.00395579	-0.0223243	-0.0506794	-0.0693283	-0.0545686	-0.0292177	-0.0174636	-0.0209391	-0.0423649	-0.0702481	-0.0543073	-0.0588438	-0.0588866	-0.125818	-0.162973	-0.141522	-0.118244	-0.083604	-0.0273613	0.0226703	0.00746145	-0.0362778	-0.0415258	-0.0411299	-0.069222	-0.0104426	0.0871637	0.0973499	0.0884307	0.0674397	0.0624559	0.00776541
Cos(Upwind)	SS49755	20xUAS-CsChrimson-mVenus-attP18	6xLED020-10s-NoOdor-0mLAir	AirLED	olfactoryArena1	Cam1	20220418T165551	6	0.0525117	0.0801245	0.128089	0.162307	0.177332	0.159454	0.0946382	0.0733149	0.0902363	0.138905	0.126961	0.0746389	0.0964126	0.0888017	0.0569464	0.0851561	0.119402	0.121688	0.10148	0.122085	0.152099	0.132927	0.187227	0.211854	0.19777	0.174539	0.148722	0.090682	0.0564653	0.0628974	0.0645103	0.0647453	0.0414998	0.0593584	0.0572284	0.0170616	0.0198184	0.0337644	-0.0163122	-0.0272072	0.0258117
Cos(Upwind)	SS49755	20xUAS-CsChrimson-mVenus-attP18	6xLED020-10s-NoOdor-0mLAir	AirLED	olfactoryArena1	Cam1	20220418T165822	6	-0.0193684	0.0034173	0.0439894	0.0542345	0.00905166	-0.0291743	-0.00478531	-0.0216397	-0.00279255	0.00881772	-0.0233306	-0.0882741	-0.076451	0.00904015	-0.00402612	-0.0408704	-0.0904298	-0.0215935	0.0369234	0.0197972	-0.0068078	0.0203935	-0.00472797	-0.0834151	-0.05968	-0.0399674	-0.074569	-0.0803491	-0.0678347	-0.107597	-0.115515	-0.0880668	-0.075178	-0.027304	0.0515289	0.0816216	0.0614966	0.00685106	-0.00916845	0.014659	-0.0418095
Cos(Upwind)	SS49755	20xUAS-CsChrimson-mVenus-attP18	6xLED020-10s-NoOdor-0mLAir	AirLED	olfactoryArena1	Cam1	20220420T191005	6	0.163286	0.165967	0.0742881	-0.00428682	0.0620365	0.0888802	0.0182224	0.040288	0.106986	0.138588	0.143698	0.144898	0.135215	0.123485	0.0860906	0.088615	0.0819819	0.0550733	0.0626556	0.0707042	0.049171	0.0732179	0.0590094	0.0277719	0.028335	0.012082	0.0528363	0.0581228	0.0825864	0.0953806	0.114733	0.113068	0.0620266	0.012229	0.0177083	0.0110148	0.044808	0.104672	0.0311915	-0.0904929	-0.0170472
Cos(Upwind)	SS49755	20xUAS-CsChrimson-mVenus-attP18	6xLED020-10s-NoOdor-0mLAir	AirLED	olfactoryArena1	Cam1	20220420T191613	6	0.0262932	0.0334176	0.0788031	0.0586239	0.053392	0.063552	0.0477699	0.0727676	0.0143064	0.0218017	0.0234656	-0.00897132	-0.0519247	-0.0729	-0.0516637	0.027513	-0.0287081	-0.055851	-0.0242475	-0.00560362	-0.0227779	-0.0421689	-0.0366917	-0.0206375	-0.0520159	-0.067756	-0.0803674	-0.0933736	-0.0988417	-0.0828429	-0.0899591	-0.0205605	0.0284068	0.0323693	0.0518162	0.0292157	-0.0305005	0.00914038	0.0584694	0.0473853	0.0451582
Cos(Upwind)	SS49755	20xUAS-CsChrimson-mVenus-attP18	6xLED020-10s-NoOdor-0mLAir	AirLED	olfactoryArena1	Cam1	20220420T193039	6	0.074216	0.10997	0.115884	0.147427	0.153695	0.160936	0.196243	0.147555	0.0775736	0.0795261	0.0843978	0.0769032	0.0468284	0.0540549	0.0989957	0.0654629	0.0545334	0.089979	0.071193	0.0879741	0.0558292	0.0833213	0.0939799	0.0926447	0.105925	0.111966	0.142732	0.0973565	0.108072	0.133304	0.172835	0.200636	0.145927	0.0550797	0.0359471	0.0798274	0.0303156	-0.0272512	-0.0200565	-0.0572867	-0.0838877
Cos(Upwind)	SS49755	20xUAS-CsChrimson-mVenus-attP18	6xLED020-10s-NoOdor-0mLAir	AirLED	olfactoryArena1	Cam1	20220420T193637	6	0.0532759	0.0838347	0.0318373	-0.00190335	0.0383881	0.0395865	0.0395565	0.0137275	0.022958	0.0271583	0.0250865	-0.0135301	-0.0146841	-0.0259098	-0.027899	0.0104007	-0.00749832	0.0248704	0.000932593	0.0588899	0.0611145	0.0257328	0.0442764	0.0401027	0.0555831	0.100322	0.107568	0.0395125	0.0581739	0.0811211	0.106549	0.150897	0.115502	0.0750698	-0.0516767	-0.142741	-0.121399	-0.0775288	-0.0233041	-9.5506e-05	-0.0340769
Cos(Upwind)	SS49755	20xUAS-CsChrimson-mVenus-attP18	6xLED020-10s-NoOdor-0mLAir	AirLED	olfactoryArena1	Cam1	20220430T020654	6	0.0175448	0.0196839	0.05487	0.00411015	-0.0169596	0.0704078	0.0537676	0.0228316	0.0378782	0.0232042	-0.019983	-0.0491799	-0.0594522	-0.0487598	-0.0161597	-0.0183423	-0.00667394	0.0139757	0.00843219	0.0207925	0.0228061	0.0271433	0.00733098	0.0138739	0.0361011	0.0463459	0.0562488	0.059051	0.0775584	0.0666967	0.0974304	0.118204	0.0755944	0.00431732	0.0456405	0.119158	0.178635	0.143335	0.162925	0.144799	0.0678
Cos(Upwind)	SS49755	20xUAS-CsChrimson-mVenus-attP18	6xLED020-10s-NoOdor-0mLAir	AirLED	olfactoryArena1	Cam1	20220430T021441	6	-0.0579918	0.0149865	0.0713403	0.0814688	0.0559735	0.0534922	0.0688153	0.106559	0.131297	0.119395	0.0904098	0.0832809	0.100024	0.0978951	0.0752149	0.0608478	0.0426736	0.0411588	0.0388928	0.108133	0.119588	0.125377	0.11036	0.0943035	0.0806858	0.106052	0.108837	0.118715	0.135326	0.114717	0.101525	0.104371	0.0821658	0.0364325	-0.00893712	-0.0130516	0.0403728	0.0766626	0.026665	-0.0150031	-0.0100389
Cos(Upwind)	SS49755	20xUAS-CsChrimson-mVenus-attP18	6xLED020-10s-NoOdor-0mLAir	AirLED	olfactoryArena1	Cam1	20220430T022357	6	0.0470088	0.125148	0.154657	0.177659	0.116312	0.170454	0.103323	0.173591	0.178242	0.14063	0.119331	0.124245	0.0699239	0.131497	0.0953109	0.0675655	0.0825114	0.0513192	-0.00327924	0.0555663	0.0737161	0.103899	0.128125	0.171291	0.119757	0.116172	0.145568	0.148171	0.0955635	0.0528304	0.101334	0.165709	0.18131	0.153491	0.197329	0.198828	0.144997	0.191052	0.0882351	-0.032619	-0.00171448
Cos(Upwind)	SS49755	20xUAS-CsChrimson-mVenus-attP18	6xLED020-10s-NoOdor-0mLAir	AirLED	olfactoryArena1	Cam1	20220430T023244	6	-0.0253616	-0.0484362	-0.0242658	0.048975	0.0591279	0.0840955	0.0870762	0.11024	0.112288	0.142175	0.154225	0.117922	0.124918	0.117227	0.127911	0.114248	0.129898	0.124973	0.0821265	0.0642501	0.0848112	0.0660192	0.0131408	0.0450854	0.0978388	0.110051	0.107571	0.062587	0.0864579	0.104445	0.0515232	0.0223473	0.0126569	0.0487245	0.0940775	0.0938986	0.0581926	0.0240679	-0.00670492	-0.0780463	-0.0910777
Cos(Upwind)	SS49755	20xUAS-CsChrimson-mVenus-attP18	6xLED020-10s-NoOdor-0mLAir	AirLED	olfactoryArena1	Cam0	20220430T022357	5	0.0116819	0.0561579	0.0377694	0.0793125	0.072398	0.0617556	0.118524	0.121714	0.0775287	0.0150231	0.0127099	0.0515573	0.0455574	0.0132925	0.0394948	0.0140383	0.00649313	0.0220322	0.0454239	0.108733	0.130351	0.0438276	-0.057037	-0.0487303	-0.0471259	0.0247444	0.0532626	0.0187706	-0.00821294	-0.0019912	0.0165503	0.0287803	0.0256879	-0.00571459	0.0482059	0.0963523	0.0401701	0.0118747	0.00322844	-0.0262415	0.0586334
Cos(Upwind)	SS49755	20xUAS-CsChrimson-mVenus-attP18	6xLED020-10s-NoOdor-0mLAir	AirLED	olfactoryArena1	Cam0	20220418T165551	4	-0.0613751	0.0198226	0.0323916	0.0980883	0.166219	0.162696	0.112229	0.0788706	0.0409673	-0.00567929	-0.00429098	0.0939813	0.160892	0.135877	0.100272	0.0975258	0.103734	0.0711664	0.0828063	0.0635888	0.108243	0.11755	0.147806	0.139823	0.12232	0.14763	0.215883	0.208525	0.154424	0.152179	0.142897	0.141006	0.168149	0.148058	0.0861825	0.07916	0.073427	0.0299636	-0.0252459	-0.100513	-0.0759029
DeltaAnglefroPreviousFrame	SS49755	20xUAS-CsChrimson-mVenus-attP18	6xLED020-10s-NoOdor-0mLAir	AirLED	olfactoryArena1	Cam0	20220413T213218	6	94.6284	104.528	120.607	106.523	102.02	104.389	117.124	117.257	101.16	106.907	112.305	104.672	106.265	108.987	111.416	108.168	112.649	101.812	117.063	104.587	114.852	112.616	105.651	105.613	112.145	115.056	112.849	110.067	107.76	101.796	105.198	113.451	114.677	136.253	155.776	172.343	171.83	179.695	191.851	183.627	174.14
DeltaAnglefroPreviousFrame	SS49755	20xUAS-CsChrimson-mVenus-attP18	6xLED020-10s-NoOdor-0mLAir	AirLED	olfactoryArena1	Cam0	20220413T213516	6	118.307	110.778	96.6206	99.8585	98.0693	85.5471	97.9908	92.6626	97.7401	92.9835	97.11	86.652	93.62	87.5705	94.8038	85.7681	96.4637	97.1881	97.3091	98.2376	92.7268	85.8311	95.1818	90.7775	92.3384	76.2117	92.343	88.9837	85.9462	97.9727	91.096	117.306	112.512	137.672	140.997	149.75	152.387	165.808	162.158	160.831	165.817
DeltaAnglefroPreviousFrame	SS49755	20xUAS-CsChrimson-mVenus-attP18	6xLED020-10s-NoOdor-0mLAir	AirLED	olfactoryArena1	Cam0	20220413T214715	6	72.8462	94.7755	88.5453	92.1136	94.4976	83.5481	89.5612	104.095	102.386	95.2164	93.9136	87.434	105.218	106.161	108.551	90.606	92.8711	103.257	95.3012	95.6116	100.413	93.2697	87.9404	94.8322	96.0016	91.8422	90.289	93.0663	91.1892	93.3967	98.1744	99.7004	100.771	112.631	113.199	125.603	149.257	146.467	162.652	159.364	166.632
DeltaAnglefroPreviousFrame	SS49755	20xUAS-CsChrimson-mVenus-attP18	6xLED020-10s-NoOdor-0mLAir	AirLED	olfactoryArena1	Cam0	20220413T215052	6	89.6843	79.2274	81.5195	86.1374	86.2301	82.8184	94.7334	89.6333	88.8168	84.2623	84.3945	86.6197	94.5545	92.0875	85.5601	84.2063	94.4079	90.0801	80.6654	87.1394	94.3595	100.658	84.974	84.2832	79.1161	88.9327	85.5229	89.7222	87.5662	87.8369	82.9067	106.132	99.1755	111.975	121.003	132.842	148.201	147.062	146.277	171.217	140.712
DeltaAnglefroPreviousFrame	SS49755	20xUAS-CsChrimson-mVenus-attP18	6xLED020-10s-NoOdor-0mLAir	AirLED	olfactoryArena1	Cam0	20220413T220431	6	73.9322	78.3147	74.3438	87.8728	88.5693	79.2153	78.1691	82.3505	89.3432	77.8215	87.3521	90.2254	88.7235	88.1624	86.8603	86.4317	85.5666	81.2023	79.8477	77.2185	79.47	75.8224	87.3819	93.8971	84.4214	80.5531	77.9844	86.8943	93.8607	83.932	87.4696	111.416	114.566	119.703	130.627	144.278	137.075	157.527	167.053	180.583	169.243
DeltaAnglefroPreviousFrame	SS49755	20xUAS-CsChrimson-mVenus-attP18	6xLED020-10s-NoOdor-0mLAir	AirLED	olfactoryArena1	Cam0	20220418T162324	6	89.9925	91.5259	86.1937	91.9665	90.6009	91.4917	79.9219	92.9223	92.6291	81.3251	86.4219	90.9676	90.3467	86.2717	89.3421	92.6369	89.9512	91.6967	88.6998	87.827	99.1068	91.4495	94.5485	84.716	82.8886	95.1985	95.8554	88.1748	82.1058	87.4712	98.6289	90.6683	86.3074	100.559	98.3605	103.204	110.399	120.762	129.552	125.528	133.549
DeltaAnglefroPreviousFrame	SS49755	20xUAS-CsChrimson-mVenus-attP18	6xLED020-10s-NoOdor-0mLAir	AirLED	olfactoryArena1	Cam0	20220418T163823	6	82.5475	86.3785	78.9583	78.5565	87.14	77.8559	83.7195	93.5449	98.2952	84.1728	78.118	85.257	78.5532	84.1656	80.7284	86.3356	82.8447	80.898	83.7947	77.1054	77.9238	91.6818	92.7351	85.584	85.2911	86.0692	80.029	86.6229	81.667	81.8377	88.3471	78.4264	95.0263	110.459	119.339	137.56	125.704	135.309	137.52	148.108	150.164
DeltaAnglefroPreviousFrame	SS49755	20xUAS-CsChrimson-mVenus-attP18	6xLED020-10s-NoOdor-0mLAir	AirLED	olfactoryArena1	Cam0	20220418T164101	6	96.1214	88.3142	90.2196	93.8658	95.3589	103.284	95.8804	87.8064	94.8146	84.7676	93.3168	96.739	94.2357	90.3811	91.7512	85.5157	90.2258	93.4134	95.571	102.371	90.918	85.7246	96.6936	96.9573	86.8358	102.136	93.6492	86.8646	88.9121	90.0167	100.334	100.227	77.5316	99.1879	117.033	135.527	132.188	143.548	147.035	149.518	137.591
DeltaAnglefroPreviousFrame	SS49755	20xUAS-CsChrimson-mVenus-attP18	6xLED020-10s-NoOdor-0mLAir	AirLED	olfactoryArena1	Cam0	20220418T165822	6	75.9687	83.4741	88.2792	92.7205	85.025	79.7185	91.0103	79.6378	95.7863	89.3647	82.5333	88.1836	88.022	89.2035	78.9774	85.565	89.3526	78.4463	81.9664	87.7017	82.3	78.0599	87.0888	94.6611	89.949	93.7622	89.3929	77.6012	82.7966	78.2849	76.2158	81.0647	79.7272	103.305	110.126	119.561	128.517	132.208	140.377	139.809	150.444
DeltaAnglefroPreviousFrame	SS49755	20xUAS-CsChrimson-mVenus-attP18	6xLED020-10s-NoOdor-0mLAir	AirLED	olfactoryArena1	Cam0	20220420T191005	6	95.2166	82.0674	81.8717	92.1986	91.6189	109.726	95.1635	90.5335	95.4581	98.3734	89.5222	101.079	94.9079	93.1023	89.2863	94.4722	94.6859	92.2824	92.4564	88.1294	87.8525	95.0379	99.697	83.5498	79.5316	86.9492	93.3106	87.224	81.154	96.8025	85.3877	86.6673	93.3894	115.185	113.318	123.972	124.401	132.54	137.562	147.869	140.258
DeltaAnglefroPreviousFrame	SS49755	20xUAS-CsChrimson-mVenus-attP18	6xLED020-10s-NoOdor-0mLAir	AirLED	olfactoryArena1	Cam0	20220420T191613	6	73.2932	88.4177	95.051	95.8648	91.0262	98.0912	85.3516	86.7441	104.09	90.0227	85.8903	82.6554	84.9843	89.1932	87.7423	91.8801	89.1791	95.9687	92.231	88.8894	93.566	94.2514	86.7594	96.1045	89.2855	91.9016	94.1799	80.0009	102.155	96.5288	88.1232	108.379	105.582	129.091	137.635	155.686	155.539	178.314	181.836	177.03	176.314
DeltaAnglefroPreviousFrame	SS49755	20xUAS-CsChrimson-mVenus-attP18	6xLED020-10s-NoOdor-0mLAir	AirLED	olfactoryArena1	Cam0	20220420T193039	6	70.5305	79.4586	80.6121	87.4997	71.9327	71.5904	66.573	69.0054	79.06	83.8041	77.1373	62.6977	75.9625	80.8247	85.3724	83.7054	77.1507	78.728	65.1021	70.0436	79.1178	85.7851	82.9368	66.4827	73.5299	75.8277	71.2507	65.9078	67.3466	69.2095	81.7788	85.0408	79.514	105.123	110.329	119.207	129.71	147.579	126.813	140.062	133.766
DeltaAnglefroPreviousFrame	SS49755	20xUAS-CsChrimson-mVenus-attP18	6xLED020-10s-NoOdor-0mLAir	AirLED	olfactoryArena1	Cam0	20220420T193637	6	54.2289	75.326	73.7715	81.3393	71.554	83.5796	73.8769	77.7333	75.443	66.7272	76.2835	77.0248	75.5487	77.7349	82.4062	76.2417	84.2307	80.6404	82.8591	75.313	70.8014	83.2852	81.3732	74.5363	68.7951	77.4754	77.5249	73.884	72.7511	88.0606	75.7915	98.4291	85.5667	103.548	121.831	134.011	130.434	124.234	151.875	149.368	142.197
DeltaAnglefroPreviousFrame	SS49755	20xUAS-CsChrimson-mVenus-attP18	6xLED020-10s-NoOdor-0mLAir	AirLED	olfactoryArena1	Cam0	20220430T020654	6	91.05	95.8249	111.545	96.5534	101.567	109.73	114.355	107.114	110.089	116.241	114.105	116.556	110.98	107.278	115.54	117.85	100.525	103.476	116.45	108.717	103.442	111.562	94.9814	112.703	115.115	107.612	108.462	110.632	112.214	117.827	101.414	81.2547	89.0584	106.394	102.188	118.989	130.492	140.064	137	143.516	152.128
DeltaAnglefroPreviousFrame	SS49755	20xUAS-CsChrimson-mVenus-attP18	6xLED020-10s-NoOdor-0mLAir	AirLED	olfactoryArena1	Cam0	20220430T021441	6	102.649	91.456	79.3328	91.6737	86.3163	90.5672	100.285	83.6895	81.9602	90.2371	77.134	76.2949	87.5125	90.0776	93.6498	99.8341	93.231	84.763	90.805	86.2448	90.5923	93.5863	93.517	92.7054	99.6782	97.6953	105.595	101.79	99.4309	86.8645	92.1107	99.7178	88.2736	116.591	134.083	142.426	154.288	164.623	156.877	158.746	164.734
DeltaAnglefroPreviousFrame	SS49755	20xUAS-CsChrimson-mVenus-attP18	6xLED020-10s-NoOdor-0mLAir	AirLED	olfactoryArena1	Cam0	20220430T023244	6	101.365	96.2183	98.0143	89.8469	107.716	100.543	95.173	103.739	105.357	105.394	101.077	98.3927	101.129	107.788	112.408	105.322	110.895	103.57	92.0076	107.156	101.195	110.749	104.233	105.31	101.981	101.032	101.494	97.135	100.758	97.7987	98.0842	95.6163	104.285	108.538	128.164	142.254	153.014	162.974	158.85	168.175	170.201
DeltaAnglefroPreviousFrame	SS49755	20xUAS-CsChrimson-mVenus-attP18	6xLED020-10s-NoOdor-0mLAir	AirLED	olfactoryArena1	Cam1	20220413T213218	6	74.6916	103.814	101.013	92.5538	95.6353	104.699	111.203	96.6086	97.6913	100.174	95.8011	98.28	86.6236	96.1973	96.1031	100.45	102.723	99.2407	91.8737	98.5655	102.791	109.808	103.012	100.895	109.943	105.219	94.7778	97.4306	102.869	91.0967	123.328	120.088	131.166	136.673	167.502	167.238	178.353	171.564	169.345	172.011	168.309
DeltaAnglefroPreviousFrame	SS49755	20xUAS-CsChrimson-mVenus-attP18	6xLED020-10s-NoOdor-0mLAir	AirLED	olfactoryArena1	Cam1	20220413T213516	6	100.501	106.169	102.201	99.9408	91.4287	101.015	108.875	94.6934	107.775	119.971	95.7675	95.61	110.262	100.723	112.928	103.718	95.8282	106.136	102.247	101.685	107.363	108.734	105.605	105.89	109.372	102.685	112.124	95.8012	102.612	102.908	107.584	89.1603	98.3158	121.579	125.719	126.687	135.576	146.372	139.924	152.227	158.042
DeltaAnglefroPreviousFrame	SS49755	20xUAS-CsChrimson-mVenus-attP18	6xLED020-10s-NoOdor-0mLAir	AirLED	olfactoryArena1	Cam1	20220413T214715	6	68.3301	91.5664	87.9459	99.3211	104.48	107.793	104.754	109.564	107.615	101.452	96.5659	98.6051	102.409	102.593	97.336	108.501	106.121	103.17	112.28	107.951	113.613	111.542	114.771	114.347	105.41	98.1223	106.585	99.9909	115.114	100.199	118.601	105.225	108.747	120.576	119.039	147.03	164.074	170.97	177.219	170.246	183.792
DeltaAnglefroPreviousFrame	SS49755	20xUAS-CsChrimson-mVenus-attP18	6xLED020-10s-NoOdor-0mLAir	AirLED	olfactoryArena1	Cam1	20220413T215052	6	71.1546	83.2222	86.1651	85.6274	83.1438	76.1667	76.6542	80.9841	84.7347	73.7473	87.0175	82.2081	82.8323	89.7425	86.9996	95.74	84.0807	85.869	102.658	99.9141	99.8677	95.1561	80.8235	98.2797	97.7724	101.911	91.3211	88.324	92.6093	95.696	116.846	103.289	135.276	143.791	150.149	153.339	172.145	173.966	175.146	173.318	179.524
DeltaAnglefroPreviousFrame	SS49755	20xUAS-CsChrimson-mVenus-attP18	6xLED020-10s-NoOdor-0mLAir	AirLED	olfactoryArena1	Cam1	20220413T220431	6	79.0637	69.1165	74.5989	74.1278	66.8384	72.1784	65.9335	77.3082	73.0504	67.5394	69.512	65.1224	64.3133	63.8596	61.37	67.2987	68.1207	62.2436	71.0143	59.8278	68.2888	69.9543	71.2605	71.9687	63.3352	73.6864	64.8312	70.2683	70.8842	77.0365	98.5195	109.813	114.195	111.686	124.448	128.028	147.019	154.785	151.622	151.29	151.05
DeltaAnglefroPreviousFrame	SS49755	20xUAS-CsChrimson-mVenus-attP18	6xLED020-10s-NoOdor-0mLAir	AirLED	olfactoryArena1	Cam1	20220418T162324	6	61.8394	90.8366	91.3612	88.7038	96.7465	91.7225	103.261	87.8821	88.851	96.951	87.4345	94.7094	90.5311	92.3058	93.3989	97.9177	83.6084	89.2336	89.1441	91.7143	80.5194	94.3666	88.0997	89.4073	93.0583	91.455	87.1812	88.9307	87.2421	88.9846	100.215	89.6359	107.701	103.591	115.817	121.789	121.885	134.997	143.633	154.841	134.722
DeltaAnglefroPreviousFrame	SS49755	20xUAS-CsChrimson-mVenus-attP18	6xLED020-10s-NoOdor-0mLAir	AirLED	olfactoryArena1	Cam1	20220418T163823	6	61.2922	83.6001	83.8333	92.1751	93.5892	89.7574	90.1076	91.4187	85.8922	86.2132	86.5172	86.9384	93.9657	89.8055	92.5761	86.8228	90.4843	92.1648	86.6177	89.5519	86.2597	86.3804	95.0059	90.9133	86.6173	85.4101	93.3538	87.7185	87.7797	87.1461	88.2126	102.951	104.858	113.518	113.253	128.591	126.305	135.262	147.793	138.014	137.793
DeltaAnglefroPreviousFrame	SS49755	20xUAS-CsChrimson-mVenus-attP18	6xLED020-10s-NoOdor-0mLAir	AirLED	olfactoryArena1	Cam1	20220418T164101	6	78.5064	75.094	82.1944	73.5019	85.3037	81.1223	82.4146	79.3437	75.5634	80.5891	77.9481	72.8663	84.05	85.8906	72.7071	73.0803	72.2643	75.4682	81.3137	81.4699	74.0405	72.7827	82.3165	82.0151	79.2408	81.3485	75.7849	83.318	83.9918	83.7928	84.0815	106.683	136.309	139.099	133.047	148.475	155.233	149.809	142.175	145.577	139.797
DeltaAnglefroPreviousFrame	SS49755	20xUAS-CsChrimson-mVenus-attP18	6xLED020-10s-NoOdor-0mLAir	AirLED	olfactoryArena1	Cam1	20220418T165551	6	67.5261	85.3879	89.3655	83.7112	82.6672	98.8148	92.3044	95.7281	85.9867	80.6091	92.7341	83.1614	88.5194	85.974	83.4243	91.1138	86.4671	87.3626	99.274	93.9073	98.4671	98.1731	98.9244	97.7646	96.0568	86.9314	91.1712	89.2336	91.2992	93.4844	89.656	111.445	113.909	112.663	129.192	141.485	145.086	139.549	145.524	151.01	150.986
DeltaAnglefroPreviousFrame	SS49755	20xUAS-CsChrimson-mVenus-attP18	6xLED020-10s-NoOdor-0mLAir	AirLED	olfactoryArena1	Cam1	20220418T165822	6	75.4571	85.0124	79.5456	87.0644	84.0945	91.3783	81.9134	70.0908	84.5237	84.5859	89.2569	83.1578	93.3236	80.4745	93.7244	88.222	89.2228	84.0646	85.7158	96.1797	102.074	94.2355	99.7292	96.2858	93.1764	83.8898	85.3094	84.7761	89.0423	90.0125	99.2131	98.8573	109.338	115.773	122.596	122.43	119.075	125.081	132.371	129.68	145.224
DeltaAnglefroPreviousFrame	SS49755	20xUAS-CsChrimson-mVenus-attP18	6xLED020-10s-NoOdor-0mLAir	AirLED	olfactoryArena1	Cam1	20220420T191005	6	80.2494	107.716	111.558	97.7308	102.293	99.1739	102.424	99.8185	102.313	99.2941	88.0149	107.541	92.3213	98.2711	84.2721	89.7442	82.9674	86.3734	96.6449	122.554	96.4652	94.2139	104.587	111.639	104.103	96.811	99.0389	86.4191	94.3819	90.1066	102.161	90.2831	125.138	133.962	134.82	124.142	139.278	149.705	144.121	147.62	154.886
DeltaAnglefroPreviousFrame	SS49755	20xUAS-CsChrimson-mVenus-attP18	6xLED020-10s-NoOdor-0mLAir	AirLED	olfactoryArena1	Cam1	20220420T191613	6	88.7491	102.48	102.586	103.724	94.9916	100.102	95.4672	95.8859	111.48	107.823	95.2915	97.5035	102.707	96.8876	100.988	102.212	87.5827	87.2751	95.0012	100.262	95.7773	91.7407	88.1403	95.7311	82.2587	87.2637	96.8553	98.5288	94.6328	106.675	110.957	107.965	132.065	143.251	148.956	156.052	152.846	163.041	160.882	161.452	184.536
DeltaAnglefroPreviousFrame	SS49755	20xUAS-CsChrimson-mVenus-attP18	6xLED020-10s-NoOdor-0mLAir	AirLED	olfactoryArena1	Cam1	20220420T193039	6	79.2297	74.007	70.955	76.9674	76.6097	75.5143	82.0684	89.7663	76.0925	75.9753	84.17	75.6555	76.9654	79.5169	81.5385	67.2993	68.0189	68.8868	68.7894	74.6948	73.9484	73.8709	71.0621	70.3995	84.1851	72.165	84.9242	88.7862	82.6929	78.4019	78.6335	79.2869	103.038	108.945	123.417	127.903	129.228	141.018	139.61	142.916	153.716
DeltaAnglefroPreviousFrame	SS49755	20xUAS-CsChrimson-mVenus-attP18	6xLED020-10s-NoOdor-0mLAir	AirLED	olfactoryArena1	Cam1	20220420T193637	6	69.5341	68.6471	77.6132	67.4004	68.8494	77.1798	66.6308	75.7527	72.4345	78.1136	75.7898	79.9969	73.8424	65.197	66.8259	80.2049	88.0962	94.9512	84.7931	84.5681	77.8814	76.7813	82.13	76.555	79.5135	86.6204	71.9661	86.4191	75.3561	87.154	82.26	84.6608	102.521	123.477	131.693	124.426	123.168	130.74	137.06	137.274	139.546
DeltaAnglefroPreviousFrame	SS49755	20xUAS-CsChrimson-mVenus-attP18	6xLED020-10s-NoOdor-0mLAir	AirLED	olfactoryArena1	Cam1	20220430T020654	6	74.0717	107.099	113.853	116.786	114.495	112.123	119.232	111.507	117.611	109.312	109	114.186	112.056	103.034	105.062	105.709	101.71	111.619	112.079	110.359	105.458	108.345	118.96	116.5	113.22	114.539	118.701	113.462	115.68	129.108	117.499	92.8808	103.419	126.197	135.042	145.788	168.123	176.067	176.965	173.294	183.993
DeltaAnglefroPreviousFrame	SS49755	20xUAS-CsChrimson-mVenus-attP18	6xLED020-10s-NoOdor-0mLAir	AirLED	olfactoryArena1	Cam1	20220430T021441	6	96.2094	111.922	106.297	116.888	108.668	110.268	112.949	110.755	107.746	105.081	114.353	112.494	114.204	111.201	109.209	108.913	113.964	110.133	115.229	112.032	113.398	113.946	118.043	122.726	124.61	111.453	109.989	122.638	120.962	123.819	117.327	105.046	110.838	127.799	134.575	125.605	151.862	153.702	177.555	167.164	164.45
DeltaAnglefroPreviousFrame	SS49755	20xUAS-CsChrimson-mVenus-attP18	6xLED020-10s-NoOdor-0mLAir	AirLED	olfactoryArena1	Cam1	20220430T022357	6	87.9232	117.334	114.98	119.43	122.084	129.265	124.28	132.998	124.85	127.519	116.087	110.836	125.006	113.272	109.363	108.044	104.574	115.115	125.313	107.909	112.602	127.32	124.156	122.966	133.04	128.018	130.705	128.824	113.6	118.739	128.407	117.678	139.739	145.125	147.076	168.787	182.946	169.574	185.854	179.59	187.75
DeltaAnglefroPreviousFrame	SS49755	20xUAS-CsChrimson-mVenus-attP18	6xLED020-10s-NoOdor-0mLAir	AirLED	olfactoryArena1	Cam1	20220430T023244	6	99.2093	107.903	110.242	123.239	110.811	102.515	107.572	123.537	104.391	118.944	112.667	114.983	114.592	123.371	110.897	115.318	120.637	124.928	118.405	115.813	135.254	126.365	124.823	124.804	115.641	122.641	113.177	127.734	129.518	117.643	127.234	99.888	115.708	138.954	162.443	173.797	176.372	182.863	188.598	210.801	182.331
DeltaAnglefroPreviousFrame	SS49755	20xUAS-CsChrimson-mVenus-attP18	6xLED020-10s-NoOdor-0mLAir	AirLED	olfactoryArena1	Cam0	20220430T022357	5	109.522	113.852	114.865	121.049	121.968	105.575	129.178	117.446	124.356	120.895	109.679	101.309	112.3	112.948	112.692	112.368	113.958	115.224	112.759	115.401	118.204	121.9	117.898	118.175	120.347	121.414	123.319	119.581	118.11	120.202	117.3	117.695	104.477	104.564	127.194	126.354	157.353	149.521	161.167	173.858	165.076
DeltaAnglefroPreviousFrame	SS49755	20xUAS-CsChrimson-mVenus-attP18	6xLED020-10s-NoOdor-0mLAir	AirLED	olfactoryArena1	Cam0	20220418T165551	4	88.49	88.7527	87.4485	80.4438	83.8869	95.283	80.7234	76.9071	75.3076	80.2896	78.629	76.7888	82.4804	72.3188	79.0861	78.4298	91.3087	93.57	84.1392	94.0719	95.7772	78.0753	81.5572	84.8427	88.2551	92.305	71.6789	115.672	89.4529	85.1951	89.7569	102.953	95.4036	112.153	107.004	118.075	126.195	124.553	136.406	156.668	144.859
WalkingDistanceFromPreviousFrame	SS49755	20xUAS-CsChrimson-mVenus-attP18	6xLED020-10s-NoOdor-0mLAir	AirLED	olfactoryArena1	Cam0	20220413T213218	6	2.70266	3.00057	2.94689	3.07614	3.01351	2.92818	2.91251	2.97429	3.02263	2.86055	2.76501	2.76603	2.87786	2.58653	2.71584	2.86566	2.95014	2.91926	2.83209	2.85491	3.03408	2.98872	3.02685	3.12655	3.19657	3.27873	3.3424	3.19597	3.19168	3.15139	3.09841	3.23121	2.73119	2.53718	2.89163	3.11938	3.36372	3.58348	3.55688	3.37652	3.42679
WalkingDistanceFromPreviousFrame	SS49755	20xUAS-CsChrimson-mVenus-attP18	6xLED020-10s-NoOdor-0mLAir	AirLED	olfactoryArena1	Cam0	20220413T213516	6	1.73888	1.8549	1.84164	1.81122	1.92445	1.83648	1.85272	1.66428	1.69782	1.78798	1.8832	1.73917	1.78529	1.7636	1.79561	1.8366	1.92479	1.76456	1.87276	1.87679	1.91147	1.86398	1.91347	2.04772	1.95553	1.86862	2.04012	1.99268	1.92647	1.9515	1.96162	2.51785	2.0444	1.88669	1.96124	2.12822	2.34856	2.50037	2.52826	2.57102	2.75143
WalkingDistanceFromPreviousFrame	SS49755	20xUAS-CsChrimson-mVenus-attP18	6xLED020-10s-NoOdor-0mLAir	AirLED	olfactoryArena1	Cam0	20220413T214715	6	2.23649	2.62527	2.49867	2.38243	2.54799	2.65596	2.67974	2.52605	2.58638	2.55649	2.62436	2.58332	2.65345	2.63937	2.75526	2.85602	2.7524	2.77902	2.67635	2.62443	2.70447	2.68208	2.70513	2.78159	2.80875	2.7166	2.85941	2.8697	2.8508	2.5502	2.53638	2.35656	1.6691	1.53737	1.65832	1.97925	2.12825	2.28107	2.41738	2.3228	2.47109
WalkingDistanceFromPreviousFrame	SS49755	20xUAS-CsChrimson-mVenus-attP18	6xLED020-10s-NoOdor-0mLAir	AirLED	olfactoryArena1	Cam0	20220413T215052	6	1.73326	1.85462	1.81087	2.00172	1.90333	1.86632	1.79869	1.84636	1.58507	1.73175	2.01678	1.83795	1.94096	2.19098	2.25082	2.27381	1.96099	2.02633	2.14552	2.05287	1.97129	2.25419	2.26052	2.12185	1.8711	1.77449	1.97426	2.05854	1.90502	1.94286	1.94468	2.49763	2.28003	2.2561	2.18512	2.21804	2.33736	2.56924	2.59978	2.55854	2.47046
WalkingDistanceFromPreviousFrame	SS49755	20xUAS-CsChrimson-mVenus-attP18	6xLED020-10s-NoOdor-0mLAir	AirLED	olfactoryArena1	Cam0	20220413T220431	6	1.6293	1.88914	1.82394	1.82165	1.92383	1.86287	1.83942	1.8322	1.90145	1.84787	1.96234	1.98743	1.88833	1.89476	1.80993	1.86477	1.84107	1.8959	1.82236	1.80443	1.82677	1.58903	1.78129	1.81982	1.88786	2.01839	1.85067	2.07037	2.0618	2.14052	2.08183	2.56684	2.04063	1.97161	2.05448	2.24642	2.25151	2.40508	2.6078	2.55183	2.74089
WalkingDistanceFromPreviousFrame	SS49755	20xUAS-CsChrimson-mVenus-attP18	6xLED020-10s-NoOdor-0mLAir	AirLED	olfactoryArena1	Cam0	20220418T162324	6	1.94714	2.27011	2.24175	2.1445	2.11292	1.97338	2.04833	1.92456	2.03349	1.90613	1.84798	1.95057	2.1117	2.05913	1.9691	2.08385	2.12596	1.98092	1.99324	1.91704	2.02882	2.01673	2.06538	2.14696	2.13553	2.10989	2.13685	2.19187	2.2337	2.04848	2.02225	2.37922	1.97882	1.94021	2.18829	2.23206	2.25611	2.24985	2.31691	2.35214	2.36255
WalkingDistanceFromPreviousFrame	SS49755	20xUAS-CsChrimson-mVenus-attP18	6xLED020-10s-NoOdor-0mLAir	AirLED	olfactoryArena1	Cam0	20220418T163823	6	2.15081	2.45544	2.53211	2.5245	2.37724	2.35956	2.40793	2.50651	2.59333	2.56846	2.47679	2.54887	2.6338	2.55012	2.4999	2.62646	2.52023	2.38156	2.29746	2.40217	2.36898	2.44077	2.4599	2.5004	2.55534	2.54808	2.48252	2.59111	2.49885	2.38254	2.32675	2.55271	2.43609	2.30388	2.43027	2.73187	2.56636	2.56645	2.78551	2.87252	2.88534
WalkingDistanceFromPreviousFrame	SS49755	20xUAS-CsChrimson-mVenus-attP18	6xLED020-10s-NoOdor-0mLAir	AirLED	olfactoryArena1	Cam0	20220418T164101	6	2.83276	3.2705	3.05546	2.80092	2.94084	2.79549	2.96937	3.07397	2.91277	2.9605	2.9613	3.03554	2.83458	2.79867	2.85353	2.86252	2.86761	2.86651	2.80113	2.9156	2.7971	2.58008	2.83535	3.03258	3.12584	3.13309	3.13188	3.08109	3.15872	3.03421	3.10598	3.49738	2.32181	2.46499	2.58195	2.75309	2.7833	2.78366	2.79189	3.00099	2.79912
WalkingDistanceFromPreviousFrame	SS49755	20xUAS-CsChrimson-mVenus-attP18	6xLED020-10s-NoOdor-0mLAir	AirLED	olfactoryArena1	Cam0	20220418T165822	6	2.49262	2.64663	2.65191	2.70285	2.68354	2.79243	2.88837	2.82155	2.81904	2.90186	2.72741	2.71776	2.80509	2.68802	2.71287	2.80022	2.80323	2.74533	2.75066	2.76206	2.69271	2.55057	2.6102	2.60947	2.53479	2.56766	2.64514	2.53879	2.4807	2.55844	2.44333	2.86899	2.01198	1.94312	1.98514	2.11024	2.25009	2.34379	2.47639	2.7034	2.73102
WalkingDistanceFromPreviousFrame	SS49755	20xUAS-CsChrimson-mVenus-attP18	6xLED020-10s-NoOdor-0mLAir	AirLED	olfactoryArena1	Cam0	20220420T191005	6	2.28745	2.4338	2.41634	2.57878	2.45541	2.45784	2.63174	2.53674	2.4727	2.22979	2.1406	2.25958	2.48982	2.40853	2.3693	2.31072	2.28197	2.3114	2.29933	2.13235	2.01292	2.03427	2.06602	2.08082	2.03435	2.05748	2.21015	2.32056	2.37224	2.12283	2.29065	2.33092	1.96783	1.94237	2.0079	2.1975	2.33858	2.31305	2.42305	2.55966	2.57266
WalkingDistanceFromPreviousFrame	SS49755	20xUAS-CsChrimson-mVenus-attP18	6xLED020-10s-NoOdor-0mLAir	AirLED	olfactoryArena1	Cam0	20220420T191613	6	2.78787	2.97069	3.03293	2.94574	2.89886	3.04194	2.99896	3.05305	3.15749	3.26792	3.22027	3.0273	3.04067	2.97432	3.01387	2.95707	2.92505	2.82651	2.77163	2.73747	2.92013	3.1174	3.12562	3.09239	3.15008	3.15069	3.12267	3.10718	3.12273	3.07712	2.94357	3.18959	2.65394	2.60466	2.6615	2.9322	2.99523	3.1493	3.12378	3.16073	3.07817
WalkingDistanceFromPreviousFrame	SS49755	20xUAS-CsChrimson-mVenus-attP18	6xLED020-10s-NoOdor-0mLAir	AirLED	olfactoryArena1	Cam0	20220420T193039	6	2.02842	2.15056	1.8756	2.12458	2.25071	1.89643	2.06584	1.98175	2.11516	2.1163	2.18257	2.18508	2.17114	2.31776	2.43757	2.22857	2.20067	2.28698	2.17429	2.37696	2.32888	2.24936	2.16958	1.80858	1.68279	1.94276	2.01656	1.86137	1.79591	1.96857	2.00731	2.03097	1.86713	2.02904	2.34479	2.24043	2.38949	2.61355	2.49938	2.49618	2.72401
WalkingDistanceFromPreviousFrame	SS49755	20xUAS-CsChrimson-mVenus-attP18	6xLED020-10s-NoOdor-0mLAir	AirLED	olfactoryArena1	Cam0	20220420T193637	6	2.35754	2.5669	2.64347	2.44422	2.4211	2.31327	2.47215	2.34696	2.43602	2.49273	2.40102	2.31061	2.45714	2.50664	2.59098	2.45475	2.5757	2.52839	2.30272	2.40606	2.3861	2.34012	2.40629	2.42359	2.4725	2.41169	2.53772	2.66975	2.58266	2.42958	2.37168	2.91805	2.40008	2.36264	2.55634	2.9913	2.82752	2.75154	2.87104	3.01722	3.03063
WalkingDistanceFromPreviousFrame	SS49755	20xUAS-CsChrimson-mVenus-attP18	6xLED020-10s-NoOdor-0mLAir	AirLED	olfactoryArena1	Cam0	20220430T020654	6	2.18515	2.50707	2.2757	2.39333	2.31235	2.37388	2.48362	2.50221	2.4658	2.4715	2.57828	2.64668	2.74773	2.55695	2.72346	2.69669	2.79218	2.8374	2.68726	2.62446	2.5566	2.59561	2.45688	2.36005	2.45542	2.44682	2.49283	2.56662	2.47461	2.59341	2.76047	2.77903	2.52054	2.25044	2.45809	2.68099	2.84388	3.01705	3.09297	3.14325	3.21592
WalkingDistanceFromPreviousFrame	SS49755	20xUAS-CsChrimson-mVenus-attP18	6xLED020-10s-NoOdor-0mLAir	AirLED	olfactoryArena1	Cam0	20220430T021441	6	1.9371	2.28469	2.27752	2.14914	2.10628	2.0613	1.97737	2.17597	2.13012	2.06342	1.72501	1.79576	2.00339	2.25131	2.01881	1.88737	2.10629	2.13331	1.98878	2.01732	1.88919	2.19429	2.13507	2.18527	2.01635	1.93736	1.86831	1.93617	2.10475	2.11788	2.04578	2.57561	2.53731	2.54846	2.59544	2.5421	2.51553	2.66012	2.79493	2.804	2.96258
WalkingDistanceFromPreviousFrame	SS49755	20xUAS-CsChrimson-mVenus-attP18	6xLED020-10s-NoOdor-0mLAir	AirLED	olfactoryArena1	Cam0	20220430T023244	6	2.14314	2.42712	2.46227	2.44285	2.47129	2.69903	2.62741	2.53182	2.62244	2.68413	2.46579	2.53419	2.57396	2.58079	2.53593	2.57741	2.6071	2.62543	2.41293	2.43289	2.59519	2.69312	2.53692	2.50425	2.63922	2.58782	2.59806	2.39374	2.4952	2.49344	2.61696	2.96762	2.61129	2.50846	2.65314	2.99442	3.0654	3.33359	3.25476	3.38192	3.37523
WalkingDistanceFromPreviousFrame	SS49755	20xUAS-CsChrimson-mVenus-attP18	6xLED020-10s-NoOdor-0mLAir	AirLED	olfactoryArena1	Cam1	20220413T213218	6	2.2913	2.65672	2.68479	2.39739	2.53505	2.7082	2.8173	2.69551	2.75095	2.86038	2.80107	2.83466	2.59224	2.45604	2.48715	2.61706	2.69211	2.54095	2.58319	2.64213	2.59637	2.55852	2.43923	2.602	2.69004	2.92407	2.85831	2.76545	2.6459	2.68602	2.88688	2.05334	1.95276	2.25238	2.44421	2.54785	2.63378	2.67561	2.61316	2.69047	2.68562
WalkingDistanceFromPreviousFrame	SS49755	20xUAS-CsChrimson-mVenus-attP18	6xLED020-10s-NoOdor-0mLAir	AirLED	olfactoryArena1	Cam1	20220413T213516	6	2.4408	2.5678	2.52233	2.60115	2.46413	2.54129	2.806	2.6655	2.66147	2.52813	2.27733	2.22941	2.44807	2.44242	2.44245	2.43117	2.54924	2.55865	2.55289	2.62575	2.54743	2.76475	2.7538	2.75514	2.72264	2.86397	2.7387	2.85028	2.88014	2.98505	3.39218	2.38937	2.04435	2.22581	2.41866	2.59875	2.58702	2.92008	2.83426	3.00598	3.30752
WalkingDistanceFromPreviousFrame	SS49755	20xUAS-CsChrimson-mVenus-attP18	6xLED020-10s-NoOdor-0mLAir	AirLED	olfactoryArena1	Cam1	20220413T214715	6	2.4284	2.65616	2.60154	2.44537	2.50296	2.49655	2.44874	2.33424	2.41829	2.55885	2.77436	2.78494	2.68279	2.74347	2.59081	2.4537	2.5906	2.6502	2.66934	2.78284	2.66149	2.66152	2.63631	2.55465	2.50971	2.37161	2.49207	2.52909	2.51192	2.39877	2.75527	2.03789	1.84287	2.09295	2.27797	2.52475	2.5973	2.79283	2.88671	2.83507	2.89587
WalkingDistanceFromPreviousFrame	SS49755	20xUAS-CsChrimson-mVenus-attP18	6xLED020-10s-NoOdor-0mLAir	AirLED	olfactoryArena1	Cam1	20220413T215052	6	1.75933	1.96986	2.11123	2.10095	2.02769	2.17513	1.9692	1.8671	1.94946	2.11964	2.00932	1.94464	2.01567	2.20451	2.19675	2.04184	2.08849	1.99974	2.17006	2.28078	2.07411	2.00881	2.24147	2.2049	2.25513	2.06513	2.19536	2.0589	2.01649	2.04542	2.20386	1.71187	1.66561	1.808	1.96967	2.10952	2.11898	2.16072	2.33115	2.48001	2.69843
WalkingDistanceFromPreviousFrame	SS49755	20xUAS-CsChrimson-mVenus-attP18	6xLED020-10s-NoOdor-0mLAir	AirLED	olfactoryArena1	Cam1	20220413T220431	6	1.45557	1.7174	1.73612	1.78638	1.84587	1.78122	1.76943	1.75737	1.66529	1.63129	1.60891	1.616	1.57023	1.60378	1.59505	1.67031	1.64676	1.59788	1.58405	1.54777	1.54428	1.49754	1.58786	1.4832	1.52879	1.55654	1.60673	1.77064	1.75451	1.83005	2.31066	1.91708	1.80381	1.94768	2.16275	2.28501	2.31958	2.3716	2.45125	2.4739	2.61036
WalkingDistanceFromPreviousFrame	SS49755	20xUAS-CsChrimson-mVenus-attP18	6xLED020-10s-NoOdor-0mLAir	AirLED	olfactoryArena1	Cam1	20220418T162324	6	2.27359	2.60694	2.72588	2.51072	2.76094	2.83209	2.78362	2.68523	2.58682	2.57296	2.58197	2.46774	2.52238	2.67168	2.57561	2.53108	2.3829	2.33116	2.51278	2.48559	2.53263	2.56558	2.76734	2.57429	2.59274	2.47069	2.53477	2.71559	2.76708	2.72521	3.25111	2.46965	2.52585	2.41786	2.39132	2.59928	2.71774	2.81423	2.85821	2.92238	2.92372
WalkingDistanceFromPreviousFrame	SS49755	20xUAS-CsChrimson-mVenus-attP18	6xLED020-10s-NoOdor-0mLAir	AirLED	olfactoryArena1	Cam1	20220418T163823	6	2.4747	2.67827	2.62464	2.63773	2.85227	2.84623	2.76319	2.67187	2.52466	2.68888	2.71639	2.73179	2.83187	2.84116	2.9839	3.02123	2.86607	2.79994	2.96025	3.0703	3.18139	3.23458	3.07346	3.19001	2.99033	2.96224	3.01522	2.95142	2.99688	3.06759	3.04946	2.3393	2.06911	2.23567	2.29321	2.44317	2.51363	2.3918	2.61121	2.57948	2.47473
WalkingDistanceFromPreviousFrame	SS49755	20xUAS-CsChrimson-mVenus-attP18	6xLED020-10s-NoOdor-0mLAir	AirLED	olfactoryArena1	Cam1	20220418T164101	6	2.28621	2.77409	2.6963	2.3939	2.38041	2.52456	2.54575	2.54468	2.42301	2.43623	2.527	2.34695	2.47241	2.41942	2.41363	2.43391	2.41017	2.46883	2.34984	2.47906	2.43425	2.3283	2.26001	2.26738	2.40778	2.45926	2.47806	2.45837	2.51929	2.37708	2.63811	2.31622	2.16845	2.36841	2.51311	2.66111	2.78734	2.82609	2.85395	2.69339	2.75853
WalkingDistanceFromPreviousFrame	SS49755	20xUAS-CsChrimson-mVenus-attP18	6xLED020-10s-NoOdor-0mLAir	AirLED	olfactoryArena1	Cam1	20220418T165551	6	2.59185	2.8522	2.90185	3.00646	2.7467	2.64695	2.65673	2.7908	2.52449	2.42702	2.42819	2.47778	2.63697	2.62083	2.60457	2.5991	2.62268	2.67315	2.8916	2.89119	2.7791	2.88816	2.79322	2.82483	2.74779	2.7385	2.673	2.77127	2.79005	2.86995	2.83547	2.22854	2.20074	2.22404	2.33406	2.39291	2.49895	2.49177	2.62131	2.7513	2.67903
WalkingDistanceFromPreviousFrame	SS49755	20xUAS-CsChrimson-mVenus-attP18	6xLED020-10s-NoOdor-0mLAir	AirLED	olfactoryArena1	Cam1	20220418T165822	6	1.75863	2.12964	2.09361	2.0174	2.01438	1.9323	1.96658	1.97341	1.92228	2.05087	2.03137	1.98438	2.07202	2.12017	2.22133	2.16865	2.08399	2.18866	2.32136	2.19262	2.21266	2.26269	2.30462	2.3733	2.43068	2.24866	2.10996	2.15347	2.1374	2.27845	2.62056	2.15149	2.28928	2.32571	2.40076	2.61655	2.39986	2.61301	2.72935	2.77666	2.95596
WalkingDistanceFromPreviousFrame	SS49755	20xUAS-CsChrimson-mVenus-attP18	6xLED020-10s-NoOdor-0mLAir	AirLED	olfactoryArena1	Cam1	20220420T191005	6	2.76446	2.9685	3.09558	3.1647	3.14286	2.94598	3.10939	3.26268	3.40536	3.03737	3.05467	3.04324	3.09175	2.99501	2.96965	2.92618	2.77968	2.79289	2.89718	3.14293	3.18511	3.07983	3.00845	3.1667	3.08207	3.03123	3.21948	3.22283	3.32663	3.46461	3.2085	2.2454	2.43696	2.48954	2.69041	2.71036	2.80198	2.78959	2.82576	3.0003	3.24379
WalkingDistanceFromPreviousFrame	SS49755	20xUAS-CsChrimson-mVenus-attP18	6xLED020-10s-NoOdor-0mLAir	AirLED	olfactoryArena1	Cam1	20220420T191613	6	2.74901	3.08525	3.07038	2.98579	2.83894	2.77335	2.63927	2.64808	2.6202	2.60584	2.58106	2.56219	2.52616	2.53308	2.57782	2.43635	2.64002	2.63584	2.51237	2.60755	2.77739	2.70821	2.64317	2.43071	2.39861	2.18355	2.30299	2.44304	2.23031	2.51411	3.0007	2.55072	2.75046	2.47903	2.92039	3.15947	3.3353	3.40341	3.41292	3.2723	3.47447
WalkingDistanceFromPreviousFrame	SS49755	20xUAS-CsChrimson-mVenus-attP18	6xLED020-10s-NoOdor-0mLAir	AirLED	olfactoryArena1	Cam1	20220420T193039	6	2.31756	2.36713	2.30676	2.42171	2.65553	2.73457	2.69241	2.55366	2.74731	2.81992	2.67008	2.61607	2.41681	2.42805	2.38766	2.30165	2.21857	2.39851	2.376	2.35731	2.48659	2.45301	2.45889	2.35719	2.34814	2.51736	2.43991	2.41647	2.65629	2.69119	2.4002	1.73344	1.78431	1.91909	2.03706	2.0448	2.03454	2.22876	2.34607	2.27874	2.501
WalkingDistanceFromPreviousFrame	SS49755	20xUAS-CsChrimson-mVenus-attP18	6xLED020-10s-NoOdor-0mLAir	AirLED	olfactoryArena1	Cam1	20220420T193637	6	1.966	2.0409	2.0505	1.94111	2.0206	1.94635	2.07976	2.01268	2.11591	2.16	2.02144	1.95677	1.9686	2.16255	2.20661	1.93393	2.15985	2.14744	2.15912	2.218	2.09067	2.25606	2.29795	2.27115	2.20657	2.19737	2.08365	2.23458	2.17237	2.21326	2.16625	1.50833	1.52182	1.77404	2.12035	2.09018	2.04865	2.15301	2.30449	2.26554	2.31887
WalkingDistanceFromPreviousFrame	SS49755	20xUAS-CsChrimson-mVenus-attP18	6xLED020-10s-NoOdor-0mLAir	AirLED	olfactoryArena1	Cam1	20220430T020654	6	2.7638	3.04865	2.961	3.17807	3.13088	3.03077	3.09502	3.00637	2.9636	2.88073	2.92535	3.08535	3.02438	3.04495	2.98188	3.08889	3.04196	3.06429	2.90093	2.89539	2.74487	2.8065	2.92702	3.1683	3.05526	2.98427	2.97023	2.9464	3.04818	3.08448	3.3696	2.34894	2.11079	2.29025	2.68805	3.0193	3.34692	3.45012	3.43733	3.45282	3.62156
WalkingDistanceFromPreviousFrame	SS49755	20xUAS-CsChrimson-mVenus-attP18	6xLED020-10s-NoOdor-0mLAir	AirLED	olfactoryArena1	Cam1	20220430T021441	6	2.41084	2.5998	2.62643	2.70954	2.82624	2.90475	2.77243	2.76487	2.74659	2.54353	2.55292	2.61433	2.56742	2.63626	2.71043	2.70541	2.81825	2.85756	2.85052	2.75634	2.65465	2.7488	2.7458	2.66046	2.68532	2.66689	2.71651	2.68649	2.64695	2.65631	2.90029	2.33079	2.21417	2.42826	2.52151	2.66109	2.7221	2.72413	3.0048	3.10221	3.11281
WalkingDistanceFromPreviousFrame	SS49755	20xUAS-CsChrimson-mVenus-attP18	6xLED020-10s-NoOdor-0mLAir	AirLED	olfactoryArena1	Cam1	20220430T022357	6	3.27216	3.72568	3.78758	3.90149	3.78841	3.50092	3.62016	3.63783	3.73748	3.62028	3.6613	3.37291	3.43482	3.41298	3.33996	3.35466	3.23831	3.17699	3.47273	3.53547	3.73697	3.69735	3.48723	3.66053	3.5277	3.45088	3.43362	3.13896	3.3227	3.54149	3.99086	2.8608	2.74575	2.84276	2.78673	2.95941	3.04414	2.92721	3.11246	3.20668	3.35334
WalkingDistanceFromPreviousFrame	SS49755	20xUAS-CsChrimson-mVenus-attP18	6xLED020-10s-NoOdor-0mLAir	AirLED	olfactoryArena1	Cam1	20220430T023244	6	2.39812	2.95513	2.93771	3.0207	2.97208	2.90286	3.00253	3.17673	3.14003	3.1045	3.07062	3.16581	3.33883	3.32372	3.19056	3.24691	3.31593	3.27287	2.97775	3.07509	3.1257	3.129	3.24641	3.12702	3.15734	3.16208	3.06116	3.11219	3.26082	3.09792	3.66324	2.7396	2.4495	2.55135	2.84112	3.11418	3.10398	3.45	3.50851	3.73996	3.75941
WalkingDistanceFromPreviousFrame	SS49755	20xUAS-CsChrimson-mVenus-attP18	6xLED020-10s-NoOdor-0mLAir	AirLED	olfactoryArena1	Cam0	20220430T022357	5	2.29481	2.60715	2.37845	2.59445	2.54998	2.60619	2.64786	2.58498	2.40376	2.59296	2.59477	2.47978	2.42863	2.54912	2.44642	2.51527	2.54898	2.55695	2.7536	2.53541	2.50842	2.68535	2.6878	2.71783	2.78165	2.86066	2.64485	2.62232	2.52016	2.62491	2.7679	2.93315	2.44688	2.31705	2.478	2.57327	2.86523	2.9261	2.99848	3.12168	3.08357
WalkingDistanceFromPreviousFrame	SS49755	20xUAS-CsChrimson-mVenus-attP18	6xLED020-10s-NoOdor-0mLAir	AirLED	olfactoryArena1	Cam0	20220418T165551	4	2.31671	2.51761	2.52516	2.65002	2.52627	2.51741	2.36692	2.30495	2.15103	2.17494	2.34998	2.27226	2.22841	2.18441	2.24096	2.3451	2.39674	2.44188	2.50634	2.6731	2.58295	2.59611	2.65647	2.54732	2.68315	2.64599	2.3009	2.97864	2.7972	2.50077	2.22062	2.54107	2.12889	2.20245	2.25544	2.30277	2.3335	2.23248	2.47831	2.6445	2.61158
revisit-10mmOut3mmIn-15s	SS49755	20xUAS-CsChrimson-mVenus-attP18	6xLED020-10s-NoOdor-0mLAir	AirLED	olfactoryArena1	Cam0	20220413T213218	6	0.0893147	0.110889	0.0655884	0.0746441	0.0941323	0.0944574	0.096779	0.0812865	0.0803472	0.0987243	0.0965243	0.096523	0.0964737	0.099443	0.110025	0.1087	0.119135	0.116173	0.11675	0.129584	0.128085	0.136752	0.164212	0.185598	0.191389	0.195283	0.228531	0.255995	0.296847	0.36364	0.396725	0.408751	0.413718	0.444039	0.449886	0.423488	0.436392	0.428809	0.479996	0.425344	0.465906
revisit-10mmOut3mmIn-15s	SS49755	20xUAS-CsChrimson-mVenus-attP18	6xLED020-10s-NoOdor-0mLAir	AirLED	olfactoryArena1	Cam0	20220413T213516	6	0.121544	0.130395	0.13913	0.140038	0.154666	0.151982	0.144838	0.138023	0.131051	0.124383	0.139453	0.162209	0.150022	0.116746	0.131955	0.114829	0.0852477	0.0735857	0.0692395	0.0691377	0.0695835	0.0826089	0.0978558	0.10332	0.162857	0.19127	0.218171	0.227952	0.235459	0.23916	0.253384	0.268204	0.321268	0.346465	0.320235	0.310842	0.309935	0.321129	0.337239	0.342337	0.342293
revisit-10mmOut3mmIn-15s	SS49755	20xUAS-CsChrimson-mVenus-attP18	6xLED020-10s-NoOdor-0mLAir	AirLED	olfactoryArena1	Cam0	20220413T214715	6	0.0501814	0.0395701	0.0471087	0.0553752	0.0611612	0.0559885	0.0608694	0.0604597	0.0695631	0.0782752	0.0803044	0.0867903	0.09738	0.0895961	0.0807891	0.0990092	0.0999647	0.115595	0.0958279	0.0905903	0.119236	0.128599	0.137458	0.160497	0.184859	0.207345	0.178483	0.190514	0.244706	0.280041	0.293322	0.288784	0.328337	0.331571	0.340015	0.335118	0.348988	0.338994	0.335988	0.334451	0.334642
revisit-10mmOut3mmIn-15s	SS49755	20xUAS-CsChrimson-mVenus-attP18	6xLED020-10s-NoOdor-0mLAir	AirLED	olfactoryArena1	Cam0	20220413T215052	6	0.0788518	0.0739583	0.078125	0.0806357	0.0870735	0.075	0.0833333	0.0909028	0.101875	0.105556	0.112639	0.122569	0.122708	0.110486	0.113194	0.118264	0.125486	0.137153	0.162847	0.162617	0.165735	0.176597	0.186389	0.158202	0.216319	0.216346	0.245406	0.245972	0.239653	0.250347	0.289931	0.341652	0.400764	0.328781	0.362091	0.291806	0.290306	0.321136	0.347305	0.326992	0.373536
revisit-10mmOut3mmIn-15s	SS49755	20xUAS-CsChrimson-mVenus-attP18	6xLED020-10s-NoOdor-0mLAir	AirLED	olfactoryArena1	Cam0	20220413T220431	6	0.102781	0.0984622	0.100019	0.100637	0.106823	0.106851	0.108883	0.131685	0.126739	0.151636	0.149926	0.155296	0.162307	0.159826	0.171439	0.173232	0.159686	0.16995	0.161009	0.153485	0.159412	0.15852	0.17484	0.186066	0.199331	0.240022	0.230282	0.242817	0.247292	0.304841	0.317614	0.320572	0.324154	0.327613	0.363239	0.346831	0.353326	0.345168	0.335026	0.346995	0.362811
revisit-10mmOut3mmIn-15s	SS49755	20xUAS-CsChrimson-mVenus-attP18	6xLED020-10s-NoOdor-0mLAir	AirLED	olfactoryArena1	Cam0	20220418T162324	6	0.0901567	0.0803606	0.0743527	0.0847257	0.0706628	0.0566277	0.0531189	0.044347	0.0596979	0.0777778	0.0812865	0.0804094	0.0611158	0.0540936	0.0528752	0.0589854	0.0758858	0.0769006	0.0811891	0.089961	0.0987329	0.115636	0.143811	0.139571	0.13105	0.130966	0.142776	0.189601	0.228743	0.240058	0.25848	0.30379	0.315298	0.320811	0.318358	0.331335	0.341457	0.327996	0.357475	0.375423	0.381966
revisit-10mmOut3mmIn-15s	SS49755	20xUAS-CsChrimson-mVenus-attP18	6xLED020-10s-NoOdor-0mLAir	AirLED	olfactoryArena1	Cam0	20220418T163823	6	0.0444645	0.0409566	0.0373225	0.0249541	0.0281997	0.0427172	0.066613	0.052193	0.0671053	0.0766228	0.0990255	0.112851	0.118073	0.13934	0.143287	0.120744	0.108024	0.100359	0.107558	0.117356	0.12048	0.110919	0.113937	0.119254	0.119012	0.155544	0.197444	0.17471	0.207997	0.24746	0.303093	0.341958	0.361541	0.348562	0.377518	0.38426	0.41106	0.441814	0.430931	0.41537	0.423985
revisit-10mmOut3mmIn-15s	SS49755	20xUAS-CsChrimson-mVenus-attP18	6xLED020-10s-NoOdor-0mLAir	AirLED	olfactoryArena1	Cam0	20220418T164101	6	0.0495078	0.0543057	0.0648463	0.075185	0.073418	0.0595157	0.0530695	0.0612939	0.0540509	0.040787	0.076781	0.0698372	0.0920221	0.101584	0.116381	0.146721	0.131596	0.135199	0.116247	0.115939	0.127944	0.120875	0.13227	0.141681	0.146791	0.163241	0.189032	0.238155	0.288482	0.318074	0.31457	0.358905	0.409314	0.395047	0.393266	0.377808	0.331224	0.313854	0.32628	0.344271	0.3696
revisit-10mmOut3mmIn-15s	SS49755	20xUAS-CsChrimson-mVenus-attP18	6xLED020-10s-NoOdor-0mLAir	AirLED	olfactoryArena1	Cam0	20220418T165822	6	0.0799342	0.0689542	0.0580392	0.05	0.0627451	0.0735294	0.0754902	0.0627451	0.0705882	0.054902	0.0686275	0.0520915	0.101307	0.11451	0.116667	0.102941	0.106993	0.108758	0.0846405	0.0643791	0.109533	0.0994771	0.125654	0.140298	0.154212	0.146787	0.160189	0.207222	0.23659	0.282747	0.290625	0.349191	0.411331	0.438276	0.401888	0.383114	0.398466	0.391894	0.374023	0.35941	0.343229
revisit-10mmOut3mmIn-15s	SS49755	20xUAS-CsChrimson-mVenus-attP18	6xLED020-10s-NoOdor-0mLAir	AirLED	olfactoryArena1	Cam0	20220420T191005	6	0.105512	0.105836	0.101998	0.0970862	0.106033	0.107575	0.100296	0.0850445	0.0948733	0.105773	0.0896336	0.0936733	0.103056	0.0895285	0.0979684	0.124203	0.127724	0.146842	0.155769	0.162906	0.146462	0.139029	0.130721	0.155703	0.203988	0.209294	0.206317	0.231384	0.282446	0.296966	0.324671	0.350035	0.341888	0.3164	0.328068	0.337175	0.353492	0.399202	0.383486	0.357452	0.316326
revisit-10mmOut3mmIn-15s	SS49755	20xUAS-CsChrimson-mVenus-attP18	6xLED020-10s-NoOdor-0mLAir	AirLED	olfactoryArena1	Cam0	20220420T191613	6	0.105962	0.0949275	0.120455	0.130171	0.144137	0.134651	0.135013	0.140458	0.119895	0.133202	0.126021	0.114295	0.103269	0.0949605	0.136495	0.15751	0.134321	0.1222	0.11581	0.117543	0.115942	0.116667	0.161594	0.165217	0.177536	0.18776	0.203623	0.271014	0.335837	0.370553	0.390942	0.384783	0.346979	0.34246	0.400922	0.394719	0.401828	0.369781	0.400144	0.404193	0.400151
revisit-10mmOut3mmIn-15s	SS49755	20xUAS-CsChrimson-mVenus-attP18	6xLED020-10s-NoOdor-0mLAir	AirLED	olfactoryArena1	Cam0	20220420T193039	6	0.0331128	0.053775	0.0568873	0.0512868	0.0616299	0.0694812	0.074326	0.077451	0.0769608	0.0943464	0.0987827	0.100449	0.103521	0.109009	0.114893	0.110435	0.110865	0.114487	0.120287	0.122758	0.135347	0.149853	0.145727	0.141225	0.136253	0.137553	0.145188	0.190735	0.227945	0.262708	0.306826	0.318254	0.32136	0.333068	0.306908	0.34971	0.359199	0.362215	0.35165	0.364126	0.361185
revisit-10mmOut3mmIn-15s	SS49755	20xUAS-CsChrimson-mVenus-attP18	6xLED020-10s-NoOdor-0mLAir	AirLED	olfactoryArena1	Cam0	20220420T193637	6	0.0483918	0.03663	0.0561151	0.0602241	0.0434982	0.0268301	0.0238095	0.0178571	0.021056	0.0413919	0.0598901	0.0622711	0.0706044	0.0872711	0.092033	0.0990842	0.0928571	0.0884615	0.0801282	0.0932234	0.113902	0.12618	0.145552	0.161538	0.182967	0.226374	0.208333	0.235464	0.265476	0.288095	0.347619	0.37568	0.360022	0.427181	0.444841	0.431852	0.467883	0.484238	0.516941	0.504091	0.530294
revisit-10mmOut3mmIn-15s	SS49755	20xUAS-CsChrimson-mVenus-attP18	6xLED020-10s-NoOdor-0mLAir	AirLED	olfactoryArena1	Cam0	20220430T020654	6	0.190384	0.177698	0.164683	0.136362	0.135873	0.143889	0.141349	0.154048	0.158889	0.106429	0.117302	0.115714	0.11127	0.113651	0.109045	0.10666	0.0975397	0.115873	0.126032	0.145159	0.163492	0.170159	0.182381	0.164603	0.162778	0.22119	0.257063	0.273175	0.300317	0.30619	0.309683	0.330317	0.359921	0.393254	0.39881	0.35127	0.386429	0.406984	0.399048	0.404145	0.400476
revisit-10mmOut3mmIn-15s	SS49755	20xUAS-CsChrimson-mVenus-attP18	6xLED020-10s-NoOdor-0mLAir	AirLED	olfactoryArena1	Cam0	20220430T021441	6	0.112435	0.117778	0.113333	0.147778	0.143333	0.0877778	0.09	0.103333	0.101111	0.0922222	0.106667	0.114444	0.0922222	0.0833333	0.0888889	0.0877778	0.102222	0.0933333	0.116667	0.143333	0.101111	0.0911111	0.115556	0.103333	0.113542	0.171111	0.168889	0.218889	0.211335	0.268076	0.282222	0.305556	0.327778	0.321111	0.38	0.394444	0.389247	0.36	0.335556	0.304444	0.342222
revisit-10mmOut3mmIn-15s	SS49755	20xUAS-CsChrimson-mVenus-attP18	6xLED020-10s-NoOdor-0mLAir	AirLED	olfactoryArena1	Cam0	20220430T023244	6	0.0971402	0.12807	0.125833	0.14193	0.138289	0.140702	0.139781	0.131316	0.132632	0.137193	0.174737	0.176974	0.148202	0.16443	0.148041	0.163323	0.191404	0.181579	0.176316	0.206228	0.200439	0.212281	0.231053	0.264474	0.26886	0.258333	0.250787	0.303465	0.370482	0.391053	0.396228	0.39585	0.386623	0.40364	0.448202	0.434053	0.411842	0.419605	0.418246	0.418202	0.396096
revisit-10mmOut3mmIn-15s	SS49755	20xUAS-CsChrimson-mVenus-attP18	6xLED020-10s-NoOdor-0mLAir	AirLED	olfactoryArena1	Cam1	20220413T213218	6	0.102259	0.0923141	0.0877193	0.0850877	0.0754386	0.0868421	0.0640815	0.0763158	0.072807	0.0833333	0.095614	0.115789	0.109649	0.112281	0.114912	0.100877	0.0940128	0.072807	0.0736842	0.0947368	0.0912281	0.102632	0.12193	0.124561	0.154386	0.158029	0.187719	0.251954	0.301754	0.311603	0.33881	0.354386	0.422362	0.43979	0.433285	0.402358	0.41967	0.377546	0.387237	0.415135	0.437168
revisit-10mmOut3mmIn-15s	SS49755	20xUAS-CsChrimson-mVenus-attP18	6xLED020-10s-NoOdor-0mLAir	AirLED	olfactoryArena1	Cam1	20220413T213516	6	0.0893861	0.117937	0.121569	0.132353	0.144118	0.14902	0.137255	0.138235	0.160784	0.158824	0.146078	0.156863	0.145098	0.144118	0.126471	0.127619	0.136275	0.145098	0.141176	0.136275	0.13356	0.117647	0.132353	0.119608	0.128431	0.158824	0.224794	0.244118	0.25	0.302941	0.385573	0.436275	0.402941	0.398039	0.441256	0.450154	0.462439	0.4769	0.490441	0.508769	0.525472
revisit-10mmOut3mmIn-15s	SS49755	20xUAS-CsChrimson-mVenus-attP18	6xLED020-10s-NoOdor-0mLAir	AirLED	olfactoryArena1	Cam1	20220413T214715	6	0.0989269	0.10386	0.102597	0.0696609	0.0571429	0.073088	0.0795815	0.0976912	0.102561	0.107648	0.112915	0.112078	0.10404	0.100722	0.114802	0.138357	0.137085	0.140296	0.154282	0.131632	0.151953	0.168326	0.163636	0.19197	0.242424	0.237916	0.279322	0.314137	0.352525	0.356926	0.371021	0.456292	0.479076	0.446839	0.425439	0.428963	0.427333	0.457859	0.419858	0.404509	0.395673
revisit-10mmOut3mmIn-15s	SS49755	20xUAS-CsChrimson-mVenus-attP18	6xLED020-10s-NoOdor-0mLAir	AirLED	olfactoryArena1	Cam1	20220413T215052	6	0.0973554	0.0953254	0.0809524	0.0914072	0.109524	0.109524	0.107143	0.109524	0.115873	0.109524	0.111439	0.11746	0.126984	0.132273	0.124846	0.115484	0.129365	0.130952	0.135828	0.13104	0.155026	0.148013	0.14769	0.175294	0.211811	0.237475	0.253104	0.259243	0.30244	0.275072	0.298251	0.323915	0.366153	0.347848	0.295099	0.301969	0.345174	0.37217	0.422868	0.401679	0.382075
revisit-10mmOut3mmIn-15s	SS49755	20xUAS-CsChrimson-mVenus-attP18	6xLED020-10s-NoOdor-0mLAir	AirLED	olfactoryArena1	Cam1	20220413T220431	6	0.0610065	0.0606465	0.0515849	0.0602389	0.0671822	0.0923069	0.0972737	0.120073	0.119584	0.119401	0.119517	0.121869	0.117602	0.106766	0.104289	0.107286	0.141026	0.141406	0.124583	0.127352	0.128739	0.118557	0.120658	0.140607	0.145314	0.187931	0.22015	0.25514	0.265968	0.262398	0.278303	0.29455	0.288183	0.29039	0.304132	0.332615	0.378398	0.337423	0.33508	0.353426	0.380333
revisit-10mmOut3mmIn-15s	SS49755	20xUAS-CsChrimson-mVenus-attP18	6xLED020-10s-NoOdor-0mLAir	AirLED	olfactoryArena1	Cam1	20220418T162324	6	0.0973084	0.129378	0.137083	0.143478	0.145652	0.144928	0.121014	0.128986	0.111594	0.103623	0.092029	0.0847826	0.0826087	0.0956522	0.0913043	0.0971014	0.103623	0.105797	0.0949275	0.110145	0.132609	0.122464	0.14058	0.152987	0.180784	0.200725	0.217391	0.22971	0.257971	0.28913	0.315461	0.37971	0.394019	0.387615	0.410634	0.406555	0.431616	0.446473	0.460145	0.455797	0.432609
revisit-10mmOut3mmIn-15s	SS49755	20xUAS-CsChrimson-mVenus-attP18	6xLED020-10s-NoOdor-0mLAir	AirLED	olfactoryArena1	Cam1	20220418T163823	6	0.0457253	0.0526316	0.0517544	0.0403509	0.0412281	0.0280702	0.0342105	0.0385965	0.0552632	0.0491228	0.0473684	0.0587719	0.0692982	0.0736842	0.0675439	0.0587719	0.0429825	0.0385965	0.05	0.0570175	0.0666667	0.0807018	0.0815789	0.107018	0.147368	0.15	0.148246	0.2	0.245614	0.280702	0.313158	0.314912	0.339474	0.375439	0.363514	0.339675	0.322612	0.362682	0.349318	0.378284	0.379825
revisit-10mmOut3mmIn-15s	SS49755	20xUAS-CsChrimson-mVenus-attP18	6xLED020-10s-NoOdor-0mLAir	AirLED	olfactoryArena1	Cam1	20220418T164101	6	0.0523906	0.06588	0.0630458	0.0689084	0.0752924	0.108974	0.119153	0.12937	0.134435	0.135269	0.12425	0.124158	0.126935	0.105779	0.0917154	0.0910392	0.0977954	0.122654	0.134317	0.120539	0.114808	0.1243	0.148605	0.162	0.195989	0.227492	0.254087	0.25983	0.268948	0.295352	0.309754	0.330516	0.3346	0.34456	0.338351	0.335703	0.334643	0.294885	0.325639	0.297187	0.30404
revisit-10mmOut3mmIn-15s	SS49755	20xUAS-CsChrimson-mVenus-attP18	6xLED020-10s-NoOdor-0mLAir	AirLED	olfactoryArena1	Cam1	20220418T165551	6	0.0698225	0.0595238	0.0785714	0.0825397	0.0912698	0.123016	0.110317	0.0801587	0.081746	0.0793651	0.081746	0.0777778	0.0888889	0.0912698	0.0968254	0.0722222	0.0642857	0.081746	0.0904762	0.0984127	0.131852	0.125397	0.121429	0.131746	0.143651	0.190476	0.225397	0.285714	0.331746	0.363492	0.413492	0.45873	0.464517	0.480952	0.499206	0.511111	0.475397	0.488095	0.472222	0.446825	0.421429
revisit-10mmOut3mmIn-15s	SS49755	20xUAS-CsChrimson-mVenus-attP18	6xLED020-10s-NoOdor-0mLAir	AirLED	olfactoryArena1	Cam1	20220418T165822	6	0.104624	0.092154	0.0783138	0.0665692	0.0596491	0.0809454	0.0948343	0.0831384	0.0964425	0.102047	0.0845909	0.0784113	0.0957115	0.114571	0.133528	0.108821	0.117836	0.141912	0.171589	0.1846	0.174903	0.178349	0.162719	0.193372	0.191667	0.161014	0.153041	0.162037	0.195029	0.199659	0.248348	0.265887	0.264279	0.242349	0.276677	0.274903	0.306481	0.276706	0.278509	0.282992	0.289783
revisit-10mmOut3mmIn-15s	SS49755	20xUAS-CsChrimson-mVenus-attP18	6xLED020-10s-NoOdor-0mLAir	AirLED	olfactoryArena1	Cam1	20220420T191005	6	0.0557855	0.0854779	0.0714461	0.0615334	0.0476171	0.0441245	0.0354167	0.045098	0.0641882	0.0926539	0.0754085	0.0709355	0.0955348	0.0656863	0.0671569	0.0751225	0.10049	0.0933496	0.0995441	0.103452	0.0924224	0.108796	0.11248	0.118943	0.136057	0.145275	0.178554	0.273652	0.304017	0.307033	0.386555	0.394935	0.38334	0.402165	0.402251	0.439904	0.425038	0.405618	0.402453	0.436894	0.432897
revisit-10mmOut3mmIn-15s	SS49755	20xUAS-CsChrimson-mVenus-attP18	6xLED020-10s-NoOdor-0mLAir	AirLED	olfactoryArena1	Cam1	20220420T191613	6	0.0565272	0.075	0.0714286	0.077381	0.0988095	0.0880952	0.0833333	0.072619	0.0547619	0.0547619	0.0578042	0.0869048	0.115556	0.150556	0.176551	0.193864	0.193553	0.183564	0.203685	0.200794	0.154733	0.156746	0.164603	0.163254	0.176587	0.199799	0.213851	0.231319	0.277747	0.316637	0.33549	0.343685	0.339843	0.33956	0.332669	0.306044	0.308038	0.311447	0.386677	0.373771	0.343257
revisit-10mmOut3mmIn-15s	SS49755	20xUAS-CsChrimson-mVenus-attP18	6xLED020-10s-NoOdor-0mLAir	AirLED	olfactoryArena1	Cam1	20220420T193039	6	0.0916846	0.101185	0.0696283	0.0766748	0.0956948	0.112296	0.106801	0.0977696	0.0910539	0.100883	0.105964	0.0979984	0.113031	0.124796	0.118129	0.103513	0.092549	0.0775163	0.0790196	0.0852941	0.0952288	0.112614	0.122847	0.12558	0.125756	0.128145	0.195078	0.234677	0.26627	0.259975	0.271023	0.329206	0.306434	0.314747	0.340053	0.365315	0.385449	0.402288	0.441679	0.389963	0.416826
revisit-10mmOut3mmIn-15s	SS49755	20xUAS-CsChrimson-mVenus-attP18	6xLED020-10s-NoOdor-0mLAir	AirLED	olfactoryArena1	Cam1	20220420T193637	6	0.097106	0.0868908	0.0915692	0.0920983	0.0915692	0.0846979	0.0938596	0.0844055	0.0846004	0.0820175	0.0823076	0.0888402	0.0897661	0.0999513	0.105361	0.0998538	0.0989604	0.0882554	0.0797225	0.101265	0.124003	0.153411	0.174805	0.189474	0.228558	0.233187	0.259728	0.265643	0.324659	0.335185	0.337262	0.342159	0.339163	0.362234	0.345144	0.317885	0.312037	0.330806	0.342934	0.381092	0.438494
revisit-10mmOut3mmIn-15s	SS49755	20xUAS-CsChrimson-mVenus-attP18	6xLED020-10s-NoOdor-0mLAir	AirLED	olfactoryArena1	Cam1	20220430T020654	6	0.127313	0.118571	0.126532	0.119376	0.109181	0.104886	0.0741931	0.0756614	0.0753775	0.0677495	0.0631788	0.063662	0.0620656	0.0493029	0.0492063	0.0479003	0.0509956	0.0661411	0.0700196	0.0888392	0.0965058	0.0862571	0.0785534	0.0920785	0.108496	0.162218	0.208586	0.202151	0.219188	0.234513	0.273231	0.310588	0.352728	0.375433	0.37239	0.392757	0.445263	0.445353	0.401698	0.429428	0.44132
revisit-10mmOut3mmIn-15s	SS49755	20xUAS-CsChrimson-mVenus-attP18	6xLED020-10s-NoOdor-0mLAir	AirLED	olfactoryArena1	Cam1	20220430T021441	6	0.155856	0.146771	0.140764	0.154511	0.125878	0.112108	0.102517	0.113058	0.110992	0.109544	0.12224	0.129891	0.134378	0.120252	0.123979	0.144433	0.145396	0.136258	0.155983	0.173338	0.16667	0.185346	0.19128	0.206594	0.229472	0.232144	0.246269	0.253226	0.279956	0.320347	0.314291	0.366322	0.396551	0.423433	0.442727	0.438091	0.476605	0.471795	0.441446	0.476787	0.481572
revisit-10mmOut3mmIn-15s	SS49755	20xUAS-CsChrimson-mVenus-attP18	6xLED020-10s-NoOdor-0mLAir	AirLED	olfactoryArena1	Cam1	20220430T022357	6	0.117667	0.133185	0.138701	0.142762	0.126216	0.097381	0.0852381	0.104112	0.109332	0.119084	0.114385	0.11507	0.100131	0.0802983	0.0924424	0.0931927	0.0979304	0.0951775	0.0883494	0.109437	0.152468	0.188488	0.193682	0.15938	0.217788	0.267065	0.257052	0.270455	0.340315	0.348878	0.370983	0.366215	0.377085	0.393444	0.404433	0.44397	0.453175	0.432985	0.49	0.46012	0.393718
revisit-10mmOut3mmIn-15s	SS49755	20xUAS-CsChrimson-mVenus-attP18	6xLED020-10s-NoOdor-0mLAir	AirLED	olfactoryArena1	Cam1	20220430T023244	6	0.162912	0.159361	0.133596	0.148728	0.104288	0.111598	0.128797	0.130683	0.104307	0.120507	0.161722	0.156271	0.162979	0.144055	0.13267	0.151444	0.17807	0.150858	0.132633	0.166801	0.189534	0.189	0.171044	0.166169	0.179871	0.184317	0.239474	0.250186	0.288935	0.333333	0.337367	0.355287	0.353814	0.343781	0.346415	0.345589	0.37173	0.382062	0.444119	0.473501	0.437416
revisit-10mmOut3mmIn-15s	SS49755	20xUAS-CsChrimson-mVenus-attP18	6xLED020-10s-NoOdor-0mLAir	AirLED	olfactoryArena1	Cam0	20220430T022357	5	0.163886	0.155593	0.139415	0.12	0.114615	0.117901	0.121908	0.125658	0.137516	0.101619	0.104615	0.121538	0.113846	0.122308	0.121538	0.152308	0.142308	0.113986	0.123077	0.14711	0.171651	0.184669	0.168986	0.196154	0.171538	0.186923	0.191538	0.234615	0.284033	0.301538	0.344018	0.386154	0.422655	0.463151	0.453733	0.461538	0.439231	0.463077	0.461919	0.457253	0.442605
revisit-10mmOut3mmIn-15s	SS49755	20xUAS-CsChrimson-mVenus-attP18	6xLED020-10s-NoOdor-0mLAir	AirLED	olfactoryArena1	Cam0	20220418T165551	4	0.0575041	0.0391054	0.0598279	0.0389493	0.0325181	0.0410326	0.0442029	0.0345109	0.0312953	0.0525837	0.047822	0.060322	0.057197	0.0551136	0.044697	0.0457386	0.0301136	0.0297348	0.0510632	0.0639124	0.0974715	0.106703	0.0958786	0.119565	0.149986	0.1649	0.191084	0.265534	0.298505	0.326733	0.318886	0.372328	0.383514	0.359013	0.369792	0.397653	0.419293	0.446875	0.463089	0.466893	0.455933
DeltaDistanceFromCenter	Gr64f-GAL4	20xUAS-CsChrimson-mVenus-attP18	6xLED020-10s-NoOdor-0mLAir	AirLED	olfactoryArena1	Cam0	20220413T200142	6	0.0358307	0.0429959	0.0434918	0.0411239	0.0425505	0.0430778	0.0486351	0.0537942	0.0508446	0.0491089	0.041803	0.0319944	0.0225599	0.0173495	0.00833638	0.00185375	-0.00116977	-0.00649242	-0.0115773	-0.0108009	-0.00476172	-0.00458197	-0.00561338	-0.00802242	-0.00668348	-0.00483407	-0.00763066	7.657e-05	0.00473613	0	-0.0122387	-0.00894495	-0.00628799	-0.00647165	-0.0063335	-0.00656899	-0.0065125	-0.00504429	-0.00261608	-0.00274333	-0.00272841
DeltaDistanceFromCenter	Gr64f-GAL4	20xUAS-CsChrimson-mVenus-attP18	6xLED020-10s-NoOdor-0mLAir	AirLED	olfactoryArena1	Cam0	20220413T200856	6	-0.0247279	-0.0267991	-0.028979	-0.0311917	-0.0350812	-0.03121	-0.028292	-0.0282312	-0.0261361	-0.0225486	-0.0212154	-0.0186181	-0.014555	-0.00930049	-0.00175033	0.000267007	-0.00290563	-0.00512389	-0.00558462	-0.00767677	-0.00160192	0.00172614	0.00591594	0.00672183	0.0016377	-0.00225383	-0.00161544	-0.00319645	-0.00176679	0	-0.000903291	-0.00272428	-0.00257262	-0.00236351	-0.00209683	-0.00265122	-0.00158193	-0.00198444	-0.00200516	-0.00183195	-0.0058572
DeltaDistanceFromCenter	Gr64f-GAL4	20xUAS-CsChrimson-mVenus-attP18	6xLED020-10s-NoOdor-0mLAir	AirLED	olfactoryArena1	Cam0	20220418T141925	6	-0.00708408	-0.00545756	-0.00696554	-0.0111321	-0.0137065	-0.0165916	-0.0184144	-0.0212523	-0.0241723	-0.0241507	-0.0244867	-0.024605	-0.0207261	-0.0197949	-0.0216223	-0.022856	-0.0206393	-0.0182379	-0.0146159	-0.0125569	-0.00805695	-0.00809237	-0.00446283	-0.0047855	-0.00628354	-0.00705644	-0.00583807	-0.00588768	-0.00537381	0	0.00234684	0.00518587	0.00579382	0.0022304	0.000962344	0.00112448	0.00234594	-0.00234746	-0.00589519	-0.00533731	-0.0108216
DeltaDistanceFromCenter	Gr64f-GAL4	20xUAS-CsChrimson-mVenus-attP18	6xLED020-10s-NoOdor-0mLAir	AirLED	olfactoryArena1	Cam0	20220420T172209	6	-0.143956	-0.129565	-0.116986	-0.113313	-0.114749	-0.111643	-0.107153	-0.116025	-0.116442	-0.116816	-0.111716	-0.118401	-0.122355	-0.12062	-0.125233	-0.127305	-0.123459	-0.105493	-0.0916921	-0.0769866	-0.0590635	-0.0414396	-0.0421056	-0.0349084	-0.0269772	-0.0164765	-0.0103588	-0.00480473	0.000122709	0	-0.00643649	-0.0097996	-0.0105948	-0.0105549	-0.0112163	-0.016236	-0.0167189	-0.0177541	-0.0177259	-0.0175334	-0.0209418
DeltaDistanceFromCenter	Gr64f-GAL4	20xUAS-CsChrimson-mVenus-attP18	6xLED020-10s-NoOdor-0mLAir	AirLED	olfactoryArena1	Cam1	20220413T200142	6	-0.0180709	-0.0191253	-0.017466	-0.00857952	-0.0113219	-0.0130422	-0.0237552	-0.0235355	-0.0219687	-0.00682454	-0.00069938	0.00405114	0.000943127	-0.00394733	-0.00345403	-0.00820064	-0.0130225	0.00192259	0.00974182	0.0110071	0.0191012	0.0171642	0.0238695	0.0244261	0.0225125	0.0137632	0.0124161	0.000199231	-0.00648726	0	0.0157472	0.0177694	0.0178601	0.0154401	0.0223265	0.0164533	0.0192349	0.0240643	0.0247883	0.0239996	0.027738
DeltaDistanceFromCenter	Gr64f-GAL4	20xUAS-CsChrimson-mVenus-attP18	6xLED020-10s-NoOdor-0mLAir	AirLED	olfactoryArena1	Cam1	20220413T200856	6	0.000406483	0.00105538	0.000743543	-0.00122746	-0.00126493	0.00071826	0.00373149	0.00135573	-0.00316806	0.000501796	0.00591555	0.00720006	0.0111922	0.0157991	0.0206587	0.0265462	0.0279685	0.0260189	0.0246236	0.0182843	0.00877624	0.00143239	-0.000701797	0.000140379	-0.00243323	-0.00657387	-0.00552812	-0.00216771	-0.00231625	0	0.000430411	0.000516322	-9.3956e-05	-0.000139813	-0.000344741	-0.000486231	-0.000370184	-0.000473128	-0.00102293	-0.00149463	-0.000162713
DeltaDistanceFromCenter	Gr64f-GAL4	20xUAS-CsChrimson-mVenus-attP18	6xLED020-10s-NoOdor-0mLAir	AirLED	olfactoryArena1	Cam1	20220418T141925	6	-0.0381331	-0.0383288	-0.0431957	-0.0466276	-0.0467364	-0.0494811	-0.0517807	-0.0530146	-0.0494123	-0.0454706	-0.0417586	-0.0372381	-0.0335842	-0.0304634	-0.0319261	-0.0346328	-0.0338933	-0.0287789	-0.0261287	-0.0270219	-0.0263191	-0.0174097	-0.00661843	-0.00110391	0.000242554	-0.00511298	-0.0107144	-0.00651637	-0.00188158	0	-0.00750354	-0.0134083	-0.0135766	-0.0158862	-0.0187372	-0.0192059	-0.0201721	-0.0201825	-0.0211221	-0.0222512	-0.0228681
DeltaDistanceFromCenter	Gr64f-GAL4	20xUAS-CsChrimson-mVenus-attP18	6xLED020-10s-NoOdor-0mLAir	AirLED	olfactoryArena1	Cam1	20220420T172209	6	0.0322339	0.0379457	0.0431998	0.0461531	0.0430588	0.0448409	0.049298	0.0525486	0.0491894	0.0442442	0.0482206	0.0498473	0.0447605	0.0476691	0.0492797	0.0439913	0.0398191	0.0354064	0.0347168	0.0317025	0.0259937	0.0240345	0.0239903	0.022569	0.0205185	0.0174104	0.00901875	0.00270289	-0.000641476	0	0.0154723	0.0150744	0.0135402	0.0135838	0.0136848	0.013986	0.0147835	0.0150173	0.0137927	0.0137124	0.0140578
Cos(Upwind)	Gr64f-GAL4	20xUAS-CsChrimson-mVenus-attP18	6xLED020-10s-NoOdor-0mLAir	AirLED	olfactoryArena1	Cam0	20220413T200142	6	0.0209913	0.138181	0.147091	0.0874856	0.0562922	0.0467758	0.06333	0.0368016	0.0183628	-0.0554417	-0.0746342	-0.0559867	-0.00839567	0.0363423	0.000754471	0.000865789	-0.00951748	-0.00102719	0.01055	-0.00980294	-0.0103787	-0.0708137	-0.0683356	-0.0784059	-0.0439009	-0.0373519	-0.0207281	0.0894167	0.0620348	0.0494191	0.0982859	0.0971232	0.122158	0.132934	0.129859	0.145228	0.150888	0.150284	0.16429	0.171329	0.159657
Cos(Upwind)	Gr64f-GAL4	20xUAS-CsChrimson-mVenus-attP18	6xLED020-10s-NoOdor-0mLAir	AirLED	olfactoryArena1	Cam0	20220413T200856	6	0.0126591	0.0999181	0.0631388	0.0676704	0.132802	0.1813	0.174048	0.126793	0.104691	0.131415	0.0907113	0.105682	0.171558	0.137156	0.151043	0.161128	0.0879593	0.082252	0.0738956	0.0777594	0.139921	0.107435	0.0998526	0.0715313	0.0322099	0.0303179	0.0746998	0.0829891	0.109218	0.0722347	0.0656406	0.0751431	0.0707563	0.0748789	0.085662	0.0766975	0.0708874	0.0922126	0.10055	0.106106	0.0955884
Cos(Upwind)	Gr64f-GAL4	20xUAS-CsChrimson-mVenus-attP18	6xLED020-10s-NoOdor-0mLAir	AirLED	olfactoryArena1	Cam0	20220418T141925	6	0.015378	0.0319038	0.0193404	-0.00347862	0.0172291	0.0025494	-0.0128736	-0.00210777	0.0143832	0.0174987	0.0184425	0.00670159	0.0177578	0.0051777	0.0312333	0.0662869	0.0880397	0.0797178	0.0967646	0.0690746	0.0723844	0.0985622	0.0750064	0.027712	0.0365118	0.0441928	0.0739114	0.0664829	0.125088	0.145775	0.0683669	0.0937654	0.087188	0.0444352	0.0741982	0.129755	0.123157	0.0974514	0.0984034	0.0760705	0.0654333
Cos(Upwind)	Gr64f-GAL4	20xUAS-CsChrimson-mVenus-attP18	6xLED020-10s-NoOdor-0mLAir	AirLED	olfactoryArena1	Cam0	20220420T172209	6	0.106929	0.229734	0.128888	0.0605291	0.0464228	0.0699412	0.0859354	0.0482822	3.5794e-05	0.0561046	0.0803899	0.0224565	0.0511512	0.0851966	0.0961556	0.169391	0.175014	0.217369	0.150937	0.189366	0.191864	0.166664	0.163852	0.151002	0.151499	0.149081	0.149173	0.126599	0.0830742	0.0799337	0.016096	0.0519174	0.0752941	0.0789153	0.0893161	0.102341	0.118095	0.0993694	0.0999371	0.087458	0.0599592
Cos(Upwind)	Gr64f-GAL4	20xUAS-CsChrimson-mVenus-attP18	6xLED020-10s-NoOdor-0mLAir	AirLED	olfactoryArena1	Cam1	20220413T200142	6	-0.146161	-0.0963422	-0.0786821	-0.0521807	-0.0743757	-0.0651958	-0.094644	-0.116597	-0.05954	-0.0687886	-0.0292367	-0.0101538	-0.0983449	-0.131587	-0.0666817	-0.0182141	-0.0656912	-0.00186579	0.0955718	0.0990846	0.0557438	0.0289632	0.0441565	0.0127715	-0.049697	-0.0556533	-0.0368462	-0.0331095	-0.0163378	0.0652219	0.0281139	0.014836	0.0142551	0.0166739	0.0356482	0.0424443	-0.00931644	-0.0150092	-0.011585	0.00514222	0.0138783
Cos(Upwind)	Gr64f-GAL4	20xUAS-CsChrimson-mVenus-attP18	6xLED020-10s-NoOdor-0mLAir	AirLED	olfactoryArena1	Cam1	20220413T200856	6	-0.0581857	-0.0636792	-0.0569711	-0.0735408	-0.0508573	-0.0391618	-0.0103088	-0.00667092	-0.0121617	0.0117897	-0.0227714	-0.0170954	-0.0293208	-0.0314574	-0.0434322	-0.00200478	-0.075274	-0.0939707	-0.0887885	-0.120583	-0.113513	-0.0985088	-0.0353281	-0.0678805	-0.0940378	-0.0857791	-0.0712013	-0.0767569	-0.125203	-0.0935474	-0.061124	-0.0492539	-0.0474701	-0.0352793	-0.032107	-0.0274313	-0.0269989	-0.0239749	-0.0200482	-0.00939155	0.00137708
Cos(Upwind)	Gr64f-GAL4	20xUAS-CsChrimson-mVenus-attP18	6xLED020-10s-NoOdor-0mLAir	AirLED	olfactoryArena1	Cam1	20220418T141925	6	0.0629995	0.121574	0.0699395	0.0619867	0.0737393	0.0672497	0.0692226	0.076851	0.111198	0.132953	0.127846	0.155466	0.136225	0.108236	0.0835303	0.0837991	0.067262	0.046436	0.033248	0.059954	0.106097	0.115928	0.116743	0.0861534	0.0585959	0.0113437	0.00174584	0.0844446	0.0797622	0.0896201	0.0852372	0.0201023	0.0385445	0.0580316	0.0111839	-0.0271297	-0.0460626	-0.0500053	-0.0584351	-0.0865902	-0.0845951
Cos(Upwind)	Gr64f-GAL4	20xUAS-CsChrimson-mVenus-attP18	6xLED020-10s-NoOdor-0mLAir	AirLED	olfactoryArena1	Cam1	20220420T172209	6	0.0764698	0.0648144	-0.0286909	-0.0525747	-0.0299573	-0.0385171	-0.0215641	-0.0153886	-0.0756877	-0.0747935	-0.0379864	-0.0543199	-0.0552083	-0.0235125	-0.0204491	-0.0349018	-0.0487614	-0.0746831	-0.0571366	-0.0987966	-0.0492662	-0.0115361	-0.0378872	0.00158159	0.0120268	-0.0625613	-0.0791679	-0.0791124	-0.0977437	-0.0694976	0.0662648	0.0948016	0.0879697	0.0916012	0.121962	0.129218	0.129855	0.122582	0.0996288	0.109801	0.12709
DeltaAnglefroPreviousFrame	Gr64f-GAL4	20xUAS-CsChrimson-mVenus-attP18	6xLED020-10s-NoOdor-0mLAir	AirLED	olfactoryArena1	Cam0	20220413T200142	6	97.6642	123.202	118.675	119.503	116.554	111.779	119.387	111.381	118.237	119.806	118.426	116.985	127.162	117.559	111.514	111.927	113.174	128.301	117.955	113.071	104.467	127.715	119.408	127.652	118.074	130.416	110.828	118.816	113.09	114.662	111.307	69.427	29.1191	39.8484	38.4797	36.8945	33.7017	35.4019	36.6592	40.8296	35.9044
DeltaAnglefroPreviousFrame	Gr64f-GAL4	20xUAS-CsChrimson-mVenus-attP18	6xLED020-10s-NoOdor-0mLAir	AirLED	olfactoryArena1	Cam0	20220413T200856	6	97.0909	114.385	117.665	113.147	116.532	114.244	120.721	113.233	116.142	117.039	126.458	119.03	119.821	116.957	115.813	117.256	117.095	111.754	122.623	122.503	124.218	116.381	126.522	120.712	108.492	119.452	111.402	124.997	121.242	125.682	103.761	27.5276	30.1226	32.5395	30.7994	35.5984	34.1428	38.3334	36.9442	39.9601	43.3889
DeltaAnglefroPreviousFrame	Gr64f-GAL4	20xUAS-CsChrimson-mVenus-attP18	6xLED020-10s-NoOdor-0mLAir	AirLED	olfactoryArena1	Cam0	20220418T141925	6	99.4591	52.8115	59.5787	61.2999	56.121	55.5844	47.5098	45.579	45.393	59.4019	53.1907	50.5485	51.3478	62.3528	58.8123	55.9378	59.1701	58.9415	54.6991	54.2381	63.1522	74.4144	74.2455	72.7076	72.4913	55.9697	60.869	59.0777	70.2712	54.3872	70.046	97.315	62.5108	66.6256	57.9864	53.5168	45.0724	46.069	31.4474	39.5663	40.6628
DeltaAnglefroPreviousFrame	Gr64f-GAL4	20xUAS-CsChrimson-mVenus-attP18	6xLED020-10s-NoOdor-0mLAir	AirLED	olfactoryArena1	Cam0	20220420T172209	6	93.5038	117.261	119.702	116.579	113.336	107.847	123.922	112.308	110.306	101.175	100.343	102.822	99.403	106.092	118.865	108.213	119.303	114.118	112.122	108.114	107.413	104.769	114.551	115.722	122.996	121.861	126.699	129.589	127.142	112.727	116.295	96.2095	37.1899	37.0618	32.9674	36.2435	33.2421	30.5231	38.1182	40.9758	48.7889
DeltaAnglefroPreviousFrame	Gr64f-GAL4	20xUAS-CsChrimson-mVenus-attP18	6xLED020-10s-NoOdor-0mLAir	AirLED	olfactoryArena1	Cam1	20220413T200142	6	91.2005	134.718	118.505	120.205	105.866	118.738	122.118	129.649	129.78	113.247	112.194	107.518	120.376	120.462	111.345	125.805	108.272	115.019	117.279	123.094	126.202	116.965	117.381	127.193	114.324	119.605	120.17	121.412	113.654	107.364	76.0055	31.5493	36.5034	43.0551	45.4228	50.7836	49.9116	49.0168	47.9071	47.7748	53.4816
DeltaAnglefroPreviousFrame	Gr64f-GAL4	20xUAS-CsChrimson-mVenus-attP18	6xLED020-10s-NoOdor-0mLAir	AirLED	olfactoryArena1	Cam1	20220413T200856	6	77.8662	115.144	99.7835	108.149	108.393	97.9343	110.163	118.199	112.263	109.616	115.248	121.061	120.192	118.649	114.595	114.48	111.563	108.552	111.475	119.026	112.047	123.602	108.82	110.429	113.472	114.2	116.095	108.434	114.796	110.945	57.3083	27.5114	31.7076	33.7183	34.8311	38.7071	40.2964	37.7096	39.6517	43.7173	44.2656
DeltaAnglefroPreviousFrame	Gr64f-GAL4	20xUAS-CsChrimson-mVenus-attP18	6xLED020-10s-NoOdor-0mLAir	AirLED	olfactoryArena1	Cam1	20220418T141925	6	106.565	61.2287	47.4657	47.7183	58.1114	47.3877	43.5326	53.0679	57.0727	53.2403	49.8437	48.6959	53.6827	47.8418	57.6491	46.7348	60.896	47.6052	60.1299	54.1137	56.0914	58.0252	58.5034	53.8791	63.8215	76.0139	55.5411	61.8769	59.6524	64.4609	128.939	56.7025	34.8016	54.963	28.2021	31.5052	28.2353	27.4001	31.2654	31.1175	31.2815
DeltaAnglefroPreviousFrame	Gr64f-GAL4	20xUAS-CsChrimson-mVenus-attP18	6xLED020-10s-NoOdor-0mLAir	AirLED	olfactoryArena1	Cam1	20220420T172209	6	95.5778	97.7811	88.2907	81.3877	92.7514	76.2402	76.6705	87.5152	90.9251	99.3259	98.307	99.5275	87.8595	98.4024	100.506	101.241	95.5794	94.3137	105.798	115.555	108.774	97.7091	93.6277	104.145	101.238	104.401	90.1302	100.68	101.289	93.2852	76.4441	39.1395	41.0236	29.5993	29.4041	30.6548	36.1863	36.1681	39.0757	44.8394	45.7911
WalkingDistanceFromPreviousFrame	Gr64f-GAL4	20xUAS-CsChrimson-mVenus-attP18	6xLED020-10s-NoOdor-0mLAir	AirLED	olfactoryArena1	Cam0	20220413T200142	6	2.15511	2.5975	2.46251	2.1868	2.26818	2.22338	2.16913	2.36593	2.22239	2.27772	2.33586	2.33896	2.26057	2.36225	2.24096	2.33377	2.22449	2.39347	2.41351	2.12072	2.25871	2.30336	2.50578	2.35247	2.13244	2.03444	2.21792	2.13433	2.04847	2.1246	2.13009	1.21725	0.297097	0.336087	0.276979	0.273195	0.270784	0.271845	0.289331	0.298146	0.298381
WalkingDistanceFromPreviousFrame	Gr64f-GAL4	20xUAS-CsChrimson-mVenus-attP18	6xLED020-10s-NoOdor-0mLAir	AirLED	olfactoryArena1	Cam0	20220413T200856	6	1.89067	2.1183	2.13659	2.11293	2.12499	2.15726	1.98752	2.03622	2.10632	2.24381	2.22534	2.29021	2.30058	2.2146	2.1902	2.10501	2.19067	2.21347	2.18346	2.26879	2.33452	2.30766	2.32781	2.34525	2.18671	2.3614	2.27905	2.2494	2.36302	2.2624	2.25335	0.428259	0.344088	0.282864	0.2554	0.27794	0.27107	0.275689	0.283653	0.301872	0.331841
WalkingDistanceFromPreviousFrame	Gr64f-GAL4	20xUAS-CsChrimson-mVenus-attP18	6xLED020-10s-NoOdor-0mLAir	AirLED	olfactoryArena1	Cam0	20220418T141925	6	0.732287	0.673932	0.846911	0.874103	0.902059	0.85967	0.909575	0.861478	0.768521	0.867821	0.892699	0.875476	0.867468	0.950833	0.970457	0.81749	0.816358	0.927895	0.836101	0.874554	0.905397	1.02405	0.943103	0.856733	0.966452	0.954822	0.670809	0.894332	0.938366	0.821406	0.963165	1.24193	0.582365	0.68034	0.529838	0.465458	0.477314	0.523132	0.442719	0.393834	0.448357
WalkingDistanceFromPreviousFrame	Gr64f-GAL4	20xUAS-CsChrimson-mVenus-attP18	6xLED020-10s-NoOdor-0mLAir	AirLED	olfactoryArena1	Cam0	20220420T172209	6	2.10219	2.36582	2.25027	2.37397	2.58387	2.45884	2.55817	2.64256	2.58837	2.2889	2.32275	2.50824	2.61556	2.41221	2.56064	2.38898	2.47391	2.44351	2.43804	2.27538	2.39939	2.30997	2.34738	2.51045	2.40944	2.46597	2.39185	2.59427	2.56182	2.54922	2.56685	1.57503	0.355681	0.348704	0.301279	0.327054	0.295616	0.318301	0.367318	0.438241	0.513123
WalkingDistanceFromPreviousFrame	Gr64f-GAL4	20xUAS-CsChrimson-mVenus-attP18	6xLED020-10s-NoOdor-0mLAir	AirLED	olfactoryArena1	Cam1	20220413T200142	6	1.97473	2.22426	2.1203	2.22926	1.94625	2.05881	2.0765	2.09145	2.50399	1.88842	2.09927	1.97323	1.9732	2.00399	2.00476	2.13748	2.17168	2.16387	2.19401	2.24671	2.12071	2.09055	2.15381	1.9598	2.18107	2.04421	2.1943	2.17396	2.34823	2.1726	1.1747	0.307931	0.33295	0.331031	0.34832	0.367814	0.349674	0.341199	0.375116	0.362624	0.453737
WalkingDistanceFromPreviousFrame	Gr64f-GAL4	20xUAS-CsChrimson-mVenus-attP18	6xLED020-10s-NoOdor-0mLAir	AirLED	olfactoryArena1	Cam1	20220413T200856	6	1.7776	1.99786	1.77126	1.70176	1.67977	1.7164	1.68296	1.80706	1.73418	1.86347	1.95378	1.86145	2.03057	2.08646	1.96474	1.92027	2.07801	1.98199	1.9556	2.14051	2.12204	2.0145	2.03963	2.14084	2.15809	2.15196	2.15207	2.02934	2.02027	2.05487	0.787444	0.262713	0.24514	0.228761	0.250163	0.262378	0.302814	0.270066	0.28913	0.31216	0.335992
WalkingDistanceFromPreviousFrame	Gr64f-GAL4	20xUAS-CsChrimson-mVenus-attP18	6xLED020-10s-NoOdor-0mLAir	AirLED	olfactoryArena1	Cam1	20220418T141925	6	0.577513	0.721613	0.819438	0.87062	0.834139	0.898615	0.974408	0.966077	0.98818	0.915798	0.929192	0.917233	1.01202	1.19096	1.29609	1.04294	1.00545	1.00901	1.18498	1.28188	1.13736	1.15391	1.26236	1.27576	1.04405	1.04056	1.08621	1.16382	1.22715	1.12241	2.1639	0.701066	0.541802	0.50716	0.259331	0.238021	0.234877	0.241668	0.275306	0.283047	0.316672
WalkingDistanceFromPreviousFrame	Gr64f-GAL4	20xUAS-CsChrimson-mVenus-attP18	6xLED020-10s-NoOdor-0mLAir	AirLED	olfactoryArena1	Cam1	20220420T172209	6	1.64064	1.8706	1.65886	1.58794	1.63128	1.62941	1.48221	1.52567	1.55766	1.56132	1.64663	1.46589	1.55963	1.56368	1.63459	1.6329	1.67645	1.67864	1.71124	1.82012	1.71495	1.67741	1.71124	1.72498	1.57545	1.74419	1.77592	1.72732	1.72672	1.74757	1.13148	0.430401	0.369153	0.270214	0.25189	0.265893	0.302594	0.341461	0.415349	0.495539	0.542636
revisit-10mmOut3mmIn-15s	Gr64f-GAL4	20xUAS-CsChrimson-mVenus-attP18	6xLED020-10s-NoOdor-0mLAir	AirLED	olfactoryArena1	Cam0	20220413T200142	6	0.10927	0.082297	0.0798385	0.0920991	0.0636684	0.0504931	0.0450059	0.0450982	0.0502987	0.0523594	0.0292428	0.0235867	0.02154	0.013694	0.025	0.025731	0.0330409	0.025104	0.00963391	0.00980392	0.00986193	0.00980392	0.00980392	0.0106811	0.00980392	0.0107843	0.0210423	0.0240827	0.028225	0.0382869	0.0247013	0.0175439	0.0263158	0.0342105	0.0421053	0.0422697	0.0560823	0.0590613	0.075645	0.0734262	0.0699174
revisit-10mmOut3mmIn-15s	Gr64f-GAL4	20xUAS-CsChrimson-mVenus-attP18	6xLED020-10s-NoOdor-0mLAir	AirLED	olfactoryArena1	Cam0	20220413T200856	6	0.074916	0.0687192	0.0710796	0.0596845	0.0450365	0.0512242	0.0514148	0.0420863	0.0434943	0.0576606	0.0502503	0.0502151	0.0408981	0.0330635	0.0290419	0.0329868	0.0366402	0.0298346	0.0160408	0.00637528	0.00344828	0.00119048	0.00238095	0	0.00238095	0	0	0.00357143	0.0162493	0.0130952	0.00466201	0.00574713	0.00574713	0.0114943	0.0164325	0.0201279	0.0289943	0.023399	0.0301671	0.0424824	0.049725
revisit-10mmOut3mmIn-15s	Gr64f-GAL4	20xUAS-CsChrimson-mVenus-attP18	6xLED020-10s-NoOdor-0mLAir	AirLED	olfactoryArena1	Cam0	20220418T141925	6	0.0731307	0.0733364	0.0560745	0.0392094	0.0398504	0.032078	0.0476419	0.0742653	0.0800012	0.0643086	0.0256545	0.0230159	0.0230159	0.0230159	0.0230159	0.0230159	0.0345543	0.0242979	0.0230904	0.0246056	0.031013	0.0378663	0.0456443	0.0455586	0.0503205	0.057549	0.0479396	0.0567554	0.0605392	0.0719208	0.0703109	0.050897	0.0435862	0.0359358	0.018954	0.0249665	0.0295567	0.0349206	0.0349206	0.0306588	0.0366522
revisit-10mmOut3mmIn-15s	Gr64f-GAL4	20xUAS-CsChrimson-mVenus-attP18	6xLED020-10s-NoOdor-0mLAir	AirLED	olfactoryArena1	Cam0	20220420T172209	6	0.073277	0.0604033	0.0431624	0.050641	0.0367521	0.0313034	0.025641	0.0194506	0.027972	0.0370629	0.0381119	0.0520979	0.0468531	0.0241259	0.0224942	0.0534188	0.0184237	0.0268261	0.016453	0.0138889	0.0138889	0.0108974	0	0.00555556	0.0138889	0.0138889	0.0151709	0.0267094	0.0472222	0.082906	0.065812	0.0651709	0.0651709	0.067735	0.092094	0.0972222	0.107372	0.1	0.124359	0.15406	0.159081
revisit-10mmOut3mmIn-15s	Gr64f-GAL4	20xUAS-CsChrimson-mVenus-attP18	6xLED020-10s-NoOdor-0mLAir	AirLED	olfactoryArena1	Cam1	20220413T200142	6	0.130108	0.124506	0.126835	0.0903175	0.0958491	0.106871	0.0931159	0.0796454	0.108105	0.133395	0.0815933	0.0938889	0.085	0.1	0.0833333	0.0889988	0.0604938	0.0633333	0.0604981	0.0344444	0.0696517	0.0839095	0.0955556	0.0343137	0.0208333	0.0300926	0.0420244	0.0719444	0.0455928	0.0589873	0.0679196	0.0755556	0.0777778	0.0852853	0.103443	0.114268	0.115225	0.13963	0.12963	0.147582	0.185694
revisit-10mmOut3mmIn-15s	Gr64f-GAL4	20xUAS-CsChrimson-mVenus-attP18	6xLED020-10s-NoOdor-0mLAir	AirLED	olfactoryArena1	Cam1	20220413T200856	6	0.0594462	0.0516631	0.04871	0.0419805	0.0320707	0.0368398	0.0319951	0.0420296	0.0416667	0.04322	0.0294697	0.0136364	0.00909091	0.0121212	0	0.0106061	0.0219697	0.0143939	0.00757576	0.0030303	0	0	0	0.00757576	0.00681818	0.00454545	0.00151515	0.00909091	0.0030303	0.00166667	0.0106902	0.0159091	0.0212121	0.0227273	0.0280303	0.0325758	0.0386364	0.035303	0.0287879	0.0285899	0.0311448
revisit-10mmOut3mmIn-15s	Gr64f-GAL4	20xUAS-CsChrimson-mVenus-attP18	6xLED020-10s-NoOdor-0mLAir	AirLED	olfactoryArena1	Cam1	20220418T141925	6	0.0404891	0.0393519	0.0393519	0.0393519	0.0185185	0.0185185	0.0185185	0.037037	0.037037	0.037037	0.037037	0.037037	0.037037	0.037037	0.0240741	0.0185185	0.0259259	0.0185185	0.0310185	0.0310185	0.0185185	0.0185185	0.0206019	0.0268519	0.0185185	0.0185185	0.0185185	0.037037	0.0277778	0.0226852	0.0185185	0.0185185	0.0185185	0.00416667	0	0	0	0	0	0.0166667	0.0208333
revisit-10mmOut3mmIn-15s	Gr64f-GAL4	20xUAS-CsChrimson-mVenus-attP18	6xLED020-10s-NoOdor-0mLAir	AirLED	olfactoryArena1	Cam1	20220420T172209	6	0.0051883	0.0111111	0.01	0.0111111	0.0200794	0.0263492	0.0230159	0.0156349	0.00896825	0.0111111	0.0111111	0.0111111	0.00222222	0	0.00357143	0.00127227	0	0	0.00222222	0	0.00666667	0.0246377	0.0222222	0.0181746	0.019127	0.0222222	0.0334127	0.0419048	0.0654762	0.0643651	0.08406	0.0962393	0.10735	0.1109	0.101795	0.115287	0.140366	0.136398	0.137827	0.150049	0.167033
[truncated: 139 more columns]
