# Supplementary material for: Neural circuit mechanisms for transforming learned olfactory valences into wind-oriented movement
Source: eLife. 2023 Sep 18;12:e85756. doi: 10.7554/eLife.85756 (PMC10588983; doi:10.7554/eLife.85756)
Supplement: Figure 7—source data 1. [file elife-85756-fig7-data1.xlsx]

## Sheet: Sheet1
Odor	PA			PA			EL			EL
Training	CS+			CS-			CS+			CS-
genotype	SS33917 x CS	SS33917 x TNT	Empty x TNT	0.1559	0.0156	0.1587	0.3238	0.0654	0.2149	0.0172	0.0155	0.1468
#01	0.103	0.1922	0.2599	0.1025	-0.098	0.1941	0.2858	0.1105	0.2717	0.2586	0.1094	0.1777
#02	0.155	0.1595	-0.031	0.1858	0.0642	0.183	0.2286	0.241	0.2455	0.0842	0.1208	0.2038
#03	0.0953	0.1557	0.0384	-0.028	0.039	-0.027	0.1834	0.1056	0.1478	0.1018	0.0268	0.166
#04	0.0355	0.1154	0.1845	0.0394	0.0597	0.2031	0.1544	0.1516	0.3637	0.0942	0.1977	0.1619
#05	0.1915	0.1178	0.2401	0.0559	0.0306	-0.132	0.017	0.0553	-0.008	-0.034	-0.042	-0.052
#06	0.1261	-0.004	0.1576	0.2	0.1222	-0.024	0.3431	0.0873	0.2377	0.136	0.1746	0.0888
#07	0.1283	0.1952	0.2685	0.0906	0.0915	0.1154	0.1271	0.1392	0.0997	0.058	0.1529	-0.002
#08	0.2644	0.2649	0.2268	0.0765	0.0314	0.1112	0.2771	0.1273	0.3066	0.2222	0.1443	0.2639
#09	0.2183	0.0589	0.3771	0.0863	-0.019	-0.003	0.1928	0.1098	0.3735	0.2193	0.08	0.2502
#10	-0.084	0.0845	0.1798	-0.109	0.0139	0.0335	0.4034	-0.133	0.2928	0.0804	-0.004	0.1609
#11	0.1634	0.1834	0.1306	0.1847	0.0452	0.0051	0.3485	0.1384	0.2726	0.0798	-0.086	0.1539
#12	0.1388	0.1783	0.3297	-0.061	0.0716	0.0817	0.0463	0.1702	0.4399	0.1301	0.1356	0.1591
#13	0.2514	0.1201	0.3212	0.0834	-0.089	0.0804	0.2505	0.0608	0.1219	-0.015	0.0547	-0.02
#14	0.1056	0.041	0.0237	0.0642	0.0374	0.0421	0.3739	0.3731	0.3157	0.0338	0.0837	0.1255
#15	0.1377	0.0717	0.2324	0.1578	0.0941	0.0567	0.09	0.1454	0.1001	0.0689	0.0816	0.1752
#16	0.3002	0.0435	0.2492	-0.013	0.2213	0.0901	0.349	0.0358	0.3315	-0.002	0.2852	0.2731
#17	0.0809	0.002	0.2994	-0.058	0.1279	0.1202	0.1957	0.2695	0.1624	0.1888	0.137	0.055
#18	0.1972	0.1928	0.2403	-0.064	-0.156	0.1558	0.3362	0.0184	0.3738	0.1547	0.0883	0.3203
#19	0.0704	0.0559	0.3108	0.0407	0.0214	0.1691	0.2631	0.0319	0.193	0.149	0.0301	0.1024
#20	-0.047	0.0497	0.3036	-0.072	0.0873	0.058	0.2025	0.145	0.2736	0.219	-0.028	0.1535
#21	0.1825	0.0187	0.4437	0.2433	0.0968	-0.063	0.1207	0.0465	0.2476	0.0353	0.1761	0.1517
#22	0.1745	0.2736	-0.0008	-0.168	0.0328	0.1064	0.2615	0.3116	0.3998	0.1109	0.028	0.1893
#23	0.1345	0.126	0.2945	0.159	0.031	0.0749	0.0599	0.2323	0.282	0.1467	0.1484	0.0776
#24	0.1021	0.1002	0.1499	0.0137	-0.06	0.0974	0.3915	0.18	0.1888	0.0796	0.0305	0.1534
#25	0.3763	0.171	0.4172	0.0329	0.0351	0.1198	0.1336	0.1101	0.1668	0.2259	0.0984	0.203
#26	0.1992	0.0642	0.2591	0.1163	0.1311	0.0342	0.302	0.0536	0.2743	0.0778	0.0463	0.0985
#27	0.1693	0.0686	0.3098	-0.012	0.1318	0.0728	0.1738	0.2865	0.2094	0.1926	0.0218	-0.029
#28	0.2929	0.1229	0.4876	-0.081	0.0668	-0.05	0.2219	0.2337	0.2803	0.0992	0.0321	0.129
#29	0.1159	0.1106	0.2188	-0.046	0.1319	0.1795	0.1409	0.1391	0.1919	0.0683	0.0075	0.3116
#30	0.136	0.0584	0.2315	-0.008	0.2455	0.138	0.2147	0.0968	0.1907	0.1881	0.1224	0.0637
#31	0.2064	0.2073	0.368	0.0822	0.0859	0.0413	0.1124	0.136	0.0762	0.181	0.2071	0.3492
#32	0.0774	0.1212	0.2784	-0.072	0.0478	0.1656	0.2191	0.3163	0.1887	-0.038	0.1692	-0.071
#33	0.364	0.1496	0.4559	-0.008	0.0526	-0.085	0.2228	0.0412	0.1918	0.0057	0.0671	-0.011
#34	0.1564	-0.055	0.2748	0.0051	-0.085	-0.116	0.2932	0.2722	0.4386	0.133	0.0259	-0.025
#35	0.2613	0.1687	0.3868	0.1135	0.0078	0.0096	0.2541	0.1022	0.0726	0.1174	0.1026	0.1518
#36	0.1828	0.0598	0.211	0.0187	0.0533	0.0585	0.3322	0.1081	0.399	0.1947	0.2337	0.2758
#37	0.3312	0.0654	0.2596	0.1637	0.1156	0.055	0.2427	0.2253	0.2778	0.245	0.061	0.1136
#38	0.3361	0.0808	0.1019	0.0749	0.0102	0.0478	0.1613	0.0878	0.2537	0.0926	0.1172	0.024
#39	0.2365	0.1235	0.232	0.0464	0.0715	0.0249	0.2658	0.1371	0.2571	0.1278	0.2127	0.108
#40	0.1786	0.1924	0.1917	-0.157	0.1346	0.1407	0.1223	0.175	0.2777	0.1201	0.0428	0.0815
#41	0.2306	0.2092	0.3087	0.0854	0.0712	0.0293	0.107	0.1598	0.2196	0.1174	-0.11	0.188
#42	0.0338	0.2345	0.1168	-0.09	-0.056	0.0323	0.1384	0.1975	0.337	0.2046	0.0876	0.1523
#43	0.1891	0.1948	0.275	-0.007	0.059		0.2668	0.1682	0.2239	0.1434	0.1479	0.1181
#44	0.0881	0.078	0.2538	-0.087	0.1174		0.1756	0.1266	0.4196	0.1184	0.1664	0.2824
#45	0.015	0.1742		-0.056	0.0497		0.2592	-0.046	0.1014	0.1742	0.1599	-0.047
#46	0.3408	0.0994		0.0263	0.1549		0.2182	0.1233	0.2503	0.0319	0.0597	0.1026
#47	0.0136	0.1139		-0.01	0.0537		0.2268	0.1837	0.1057	0.2521	0.1044	0.1502
#48	0.0954	0.0821		0.0434	0.0394		0.1064	0.0765		0.1146	0.23
#49	0.0821	0.0813		-0.014	0.1185		0.2934	0.1699		0.1887	-0.026
#50	0.2513	0.0065		0.1161	0.0545		0.1713	0.0805		0.111	0.1141
#51	0.0296	0.0616		0.0426	0.0968		0.3219	0.2704		0.0776	0.0271
#52	0.1816	0.2832		0.0844	0.0143		0.1548	0.1929		0.1446	0.1079
#53	0.2551	0.186			-0.005		0.1458	-0.015		0.0763	0.1534
#54	0.0993	0.2028					0.151	0.0626		0.0622	0.2295
#55	0.2222	0.0636					0.3054	0.0851		-0.028	0.059
#56	0.2645						0.1962	0.1825		0.0115	0.1823
#57								0.2519		0.1507	0.1667
#58											0.0906
