# Supplementary material for: Neural circuit mechanisms for transforming learned olfactory valences into wind-oriented movement
Source: eLife. 2023 Sep 18;12:e85756. doi: 10.7554/eLife.85756 (PMC10588983; doi:10.7554/eLife.85756)
Supplement: Figure 7—source data 2. [file elife-85756-fig7-data2.xlsx]

## Sheet: Sheet1
Odor	PA																																										PA
Training	CS+																																										CS-
Time	SS33197 x CS														SS33917 TNT														Empty TNT														SS33197 x CS
0.333333	0.0308	-0.0086	-0.0096	0.0262	0.022667	0.014333	0.085333	-0.00683	0.032667	0.000833	-0.0384	-0.05167	0.006667	-0.0145	0.044	-0.081	-0.0736	0.0176	-0.04717	-0.0308	0.048667	-0.00867	-0.01383	0.038	0.012833	0.023333			-0.0106	-0.0038	0.1108	0.0172	-0.088	-0.05283	0.076667	0.086							0.0258	-0.01375	0.034	-0.0338	-0.00217	0.0135	-0.06117
0.666667	0.0316	-0.0198	-0.0022	0.0288	0.0215	0.009167	0.086	-0.01067	0.0265	9.25e-18	-0.0396	-0.05233	0.015667	-0.01583	0.0462	-0.072	-0.0672	0.0144	-0.05133	-0.0272	0.053833	-0.01383	-0.01633	0.0445	0.012833	0.0305			-0.0012	-0.0022	0.1068	0.0216	-0.079	-0.04917	0.080333	0.0895							0.0318	-0.01075	0.0284	-0.0288	-0.00733	0.014167	-0.06317
1	0.0304	-0.0234	-0.0024	0.0292	0.016333	0.006333	0.0785	-0.01417	0.018167	0.001333	-0.0406	-0.04967	0.0235	-0.01767	0.0482	-0.065	-0.0688	0.004	-0.05333	-0.025	0.057	-0.016	-0.02033	0.048	0.009667	0.034833			0.0024	-0.0082	0.1058	0.019	-0.06883	-0.04667	0.075667	0.095							0.0286	-0.004	0.0204	-0.0272	-0.0025	0.013	-0.0655
1.33333	0.0308	-0.0202	-0.0008	0.028	0.016667	0.003667	0.070833	-0.0025	0.013	-0.00183	-0.0422	-0.0455	0.031667	-0.01533	0.0492	-0.0654	-0.0706	0.0038	-0.05433	-0.0284	0.062	-0.01483	-0.02217	0.044833	0.005833	0.042333			0.0066	-0.0192	0.105	0.0202	-0.05617	-0.04117	0.0765	0.111							0.026	-0.00225	0.01	-0.0266	-0.00283	0.011167	-0.07267
1.66667	0.0326	-0.0154	0.0122	0.0266	0.0185	0.0005	0.0675	-0.00483	0.012	-0.00367	-0.039	-0.04	0.037	-0.017	0.0564	-0.0616	-0.0614	0.0034	-0.057	-0.03	0.063667	-0.01183	-0.02167	0.041167	0.006167	0.048333			0.0064	-0.0392	0.11	0.0212	-0.05183	-0.04817	0.078833	0.113167							0.025	-0.001	0.0006	-0.0202	-0.00283	0.0035	-0.07583
2	0.0348	-0.0132	0.0208	0.0248	0.016333	-0.00617	0.0635	-0.00067	0.015	-0.00183	-0.0366	-0.03183	0.039833	-0.0215	0.057	-0.065	-0.0514	-0.0012	-0.05883	-0.0236	0.0635	-0.00967	-0.0175	0.038	0.004833	0.048833			0.0006	-0.0502	0.1144	0.02	-0.04667	-0.051	0.073333	0.1065							0.0264	0.003	-0.0056	-0.0138	0.007333	-0.004	-0.07383
2.33333	0.0372	-0.0138	0.0194	0.0212	0.015667	-0.00667	0.053167	-0.0105	0.0085	-0.00167	-0.0292	-0.02367	0.036667	-0.01583	0.0508	-0.0606	-0.0406	-0.0058	-0.06017	-0.03	0.055833	-0.00417	-0.01783	0.034667	0.0075	0.048167			-0.0036	-0.053	0.1096	0.0164	-0.0455	-0.0525	0.063333	0.113167							0.0276	0.0065	-0.0114	-0.011	0.006	-0.00383	-0.07017
2.66667	0.0386	-0.0154	0.0198	0.02	0.020667	-0.00183	0.0455	-0.00717	0.005333	-0.00317	-0.0246	-0.0185	0.033	-0.01583	0.0502	-0.055	-0.0322	-0.011	-0.064	-0.025	0.051	-0.0005	-0.01917	0.0255	0.0125	0.048167			-0.006	-0.0464	0.1116	0.0132	-0.04767	-0.05633	0.063167	0.112							0.0284	0.013	-0.0118	-0.0074	0.004833	-0.00283	-0.063
3	0.0402	-0.0196	0.0194	0.0176	0.017667	0.006333	0.043667	-0.0005	0.0075	-0.01033	-0.0226	-0.01467	0.0345	-0.01683	0.049	-0.0416	-0.0238	-0.0128	-0.06633	-0.0214	0.047	-0.0015	-0.01683	0.016167	0.0125	0.045333			-0.0128	-0.0322	0.0986	0.0084	-0.03483	-0.05583	0.059667	0.111833							0.0288	0.01275	-0.007	-0.0044	0.004333	-0.00267	-0.05433
3.33333	0.0422	-0.0248	0.0184	0.0148	0.008833	0.020667	0.039333	0.002167	0.001667	-0.017	-0.0248	-0.01433	0.035167	-0.01817	0.0536	-0.0302	-0.0204	-0.0136	-0.06617	-0.0206	0.045333	-0.00133	-0.01	0.0205	0.010333	0.0495			-0.0242	-0.0206	0.0862	0.007	-0.03183	-0.06283	0.062	0.106833							0.024	0.008	-0.0064	-0.0058	0.0055	-0.00083	-0.045
3.66667	0.0416	-0.0242	0.014	0.0114	0.005333	0.024	0.045	0.004	0.005667	-0.0205	-0.0246	-0.01117	0.035	-0.01833	0.055	-0.026	-0.0148	-0.019	-0.06667	-0.03	0.047333	0.0005	-0.00083	0.024333	0.004833	0.049667			-0.0294	-0.0128	0.0758	0.0124	-0.03033	-0.0695	0.061667	0.111							0.0156	0.00675	-0.0026	-0.0174	0.0055	0.004	-0.03767
4	0.04	-0.025	0.008	0.0102	0.003	0.027667	0.051667	0.0065	0.001167	-0.02367	-0.0208	-0.00533	0.034	-0.01967	0.0564	-0.0264	-0.0168	-0.0256	-0.07167	-0.0276	0.043167	0.000333	0.003167	0.019833	0.002333	0.0455			-0.039	1.11e-17	0.0724	0.016	-0.02517	-0.06583	0.058167	0.109							0.0026	0.00925	0.004	-0.0148	0.003167	0.002667	-0.03867
4.33333	0.0368	-0.0278	-0.0012	0.0072	0.003667	0.036	0.054	0.006833	-0.0035	-0.028	-0.0164	-0.00533	0.033833	-0.02167	0.0642	-0.0276	-0.0164	-0.0348	-0.07617	-0.0282	0.029833	-0.00483	0.003667	0.013	0.000667	0.0385			-0.0418	0.0002	0.0724	0.0222	-0.02317	-0.074	0.057167	0.11							-0.0032	0.01225	0.0062	-0.0036	0.009833	0.001833	-0.05283
4.66667	0.0372	-0.0272	0.0144	0.0052	0.004833	0.037333	0.055833	-0.00167	-0.01067	-0.0335	-0.0104	-0.00917	0.036833	-0.02217	0.0636	-0.012	-0.0204	-0.0348	-0.08	-0.016	0.025	-0.00917	0.003333	0.002167	0.003333	0.032333			-0.0458	0.002	0.0714	0.0254	-0.02633	-0.083	0.0565	0.106							-0.014	0.0105	-0.0008	-0.0086	0.012667	0.0035	-0.056
5	0.0386	-0.0206	0.0224	0.0072	0.000333	0.037333	0.0645	-0.0035	-0.01717	-0.036	-0.0172	-0.005	0.038167	-0.02317	0.0512	-0.01	-0.0228	-0.038	-0.0825	-0.0068	0.030833	-0.00517	0.0045	-0.001	0.004	0.033333			-0.0524	0.0046	0.066	0.0246	-0.03283	-0.08133	0.055667	0.102333							-0.0244	0.00925	-0.01	-0.01	0.015333	0.001333	-0.05583
5.33333	0.0352	-0.0204	0.0238	0.0048	-0.00183	0.032	0.0625	-0.0085	-0.0165	-0.038	-0.0164	0.000833	0.042667	-0.0285	0.0404	-0.0036	-0.0222	-0.0466	-0.07633	-0.0104	0.030667	-0.00583	0.002833	-0.00133	0.002	0.0305			-0.0632	0.0104	0.0588	0.019	-0.0355	-0.07867	0.062667	0.1065							-0.0318	0.006	-0.0136	-0.0102	0.014	-0.01217	-0.05317
5.66667	0.0308	-0.026	0.022	0.0082	0.000833	0.025	0.062667	-0.00633	-0.01767	-0.0355	-0.0162	0.003667	0.044167	-0.0325	0.0264	0.014	-0.0272	-0.059	-0.0705	-0.0142	0.029333	-0.00417	-0.00367	0.000167	-0.002	0.027167			-0.0638	0.0296	0.0508	0.0148	-0.034	-0.079	0.063	0.113333							-0.0382	0.01475	-0.0116	-0.0074	0.009167	-0.00367	-0.051
6	0.0238	-0.0288	0.02	0.0094	0.0055	0.022833	0.061833	-0.00733	-0.0115	-0.03483	-0.01	0.002667	0.038833	-0.03967	0.0274	0.032	-0.0284	-0.0678	-0.0675	-0.0164	0.032167	-0.0035	-0.00683	0.004167	-0.01083	0.024667			-0.0624	0.0422	0.0626	0.0114	-0.03417	-0.08967	0.060667	0.109667							-0.0422	0.015	-0.0082	-0.0054	0.008833	0.001167	-0.04867
6.33333	0.008	-0.0288	0.028	0.0118	0.008167	0.024667	0.064333	-0.0155	-0.009	-0.03233	-0.005	-0.00017	0.033667	-0.04633	0.0242	0.0414	-0.0292	-0.0692	-0.0665	-0.0104	0.029167	-0.0015	-0.00933	0.010167	-0.0165	0.026833			-0.0634	0.0414	0.0706	0.008	-0.043	-0.0905	0.064833	0.099833							-0.0418	0.0215	-0.0068	-0.0042	0.004333	0.011667	-0.0485
6.66667	0.0034	-0.0242	0.0216	0.0176	0.0015	0.031167	0.0565	-0.00567	-0.0025	-0.03033	-0.0058	-2.78e-17	0.034833	-0.042	0.0226	0.0374	-0.0338	-0.059	-0.06383	-0.0006	0.025333	-0.01133	-0.0095	0.0125	-0.02633	0.026833			-0.067	0.024	0.0664	0.0028	-0.04617	-0.08417	0.066833	0.093167							-0.0384	0.023	-0.0166	-0.0016	0.003333	0.017	-0.04717
7	-0.0012	-0.0224	0.019	0.0202	-0.00617	0.036833	0.0535	-0.00933	-0.00117	-0.02667	-0.0064	0.0025	0.0385	-0.04033	0.0256	0.0348	-0.035	-0.048	-0.06333	0.0142	0.023667	-0.01567	-0.00917	0.016833	-0.03317	0.017667			-0.0654	0.0136	0.0546	-0.0016	-0.05083	-0.07633	0.064833	0.093167							-0.0312	0.015	-0.0232	-0.0052	0.001667	0.0135	-0.04383
7.33333	-0.0064	-0.0206	0.0238	0.0196	-0.00767	0.035333	0.045	-0.02033	-0.00467	-0.02467	-0.014	0.0055	0.031333	-0.035	0.0296	0.0382	-0.0392	-0.043	-0.06767	0.016	0.020167	-0.01567	-0.00967	0.025	-0.03383	0.012333			-0.063	0.0172	0.054	-0.005	-0.05233	-0.07583	0.063167	0.082333							-0.0222	0.01575	-0.0268	-0.014	0.000167	0.0045	-0.03883
7.66667	0.0068	-0.0252	0.0202	0.02	-0.00283	0.029333	0.041833	-0.027	-0.00917	-0.02533	-0.0186	0.007167	0.0385	-0.03583	0.0368	0.0482	-0.036	-0.035	-0.06817	0.0088	0.022	-0.00433	-0.008	0.026167	-0.03683	0.000833			-0.0646	0.0158	0.0544	-0.0038	-0.058	-0.08467	0.059667	0.073167							-0.0186	0.01775	-0.031	-0.0184	-0.00183	0.012167	-0.03683
8	0.0108	-0.0308	0.0214	0.019	0.003167	0.025833	0.043	-0.0295	-0.00983	-0.02617	-0.0202	0.009	0.037833	-0.03567	0.0418	0.046	-0.0266	-0.0324	-0.067	0.0108	0.030833	0.001	-0.01833	0.0225	-0.03683	-0.00467			-0.069	0.0132	0.0576	-0.0008	-0.06483	-0.0855	0.054667	0.069833							-0.017	0.01875	-0.027	-0.0196	-0.00517	0.0075	-0.03933
8.33333	0.0048	-0.0352	0.0192	0.0168	0.0085	0.0205	0.043	-0.03133	-0.024	-0.02667	-0.0176	0.011667	0.031167	-0.03533	0.0386	0.0442	-0.0176	-0.036	-0.059	0.0036	0.029167	0.000167	-0.01	0.021167	-0.03717	-0.00183			-0.063	0.014	0.0588	0.002	-0.06517	-0.08317	0.0585	0.066							-0.0132	0.01725	-0.0196	-0.0208	-0.01433	0.014333	-0.04333
8.66667	0.0034	-0.032	0.0068	0.017	0.014667	0.014667	0.039167	-0.03817	-0.03317	-0.02867	-0.0212	0.015333	0.023833	-0.04117	0.025	0.0498	-0.0158	-0.043	-0.04617	0.0002	0.019667	-0.00067	-0.012	0.017667	-0.035	0.007			-0.0512	0.0126	0.054	0.0094	-0.06083	-0.07617	0.058167	0.061667							-0.0132	0.015	-0.0106	-0.0238	-0.01833	0.011167	-0.04683
9	0.0042	-0.0286	0.0094	0.0178	0.011	0.010167	0.031333	-0.03333	-0.02517	-0.03033	-0.0236	0.017667	0.0355	-0.0325	0.0226	0.0552	-0.0042	-0.0458	-0.03767	-0.006	0.015833	-0.00133	-0.01717	0.0125	-0.03517	0.015			-0.0376	0.013	0.0512	0.0166	-0.05917	-0.075	0.055833	0.060333							-0.0154	0.01125	0.0046	-0.027	-0.018	0.006667	-0.04717
9.33333	0.0024	-0.0238	0.0138	0.01	0.002833	0.007667	0.026667	-0.028	-0.02583	-0.03	-0.024	0.018167	0.036	-0.03367	0.018	0.0498	0.0166	-0.0494	-0.03333	-0.0126	0.016167	-0.00867	-0.01683	0.007333	-0.02533	0.017167			-0.0322	0.0226	0.0508	0.016	-0.0625	-0.06767	0.047833	0.065							-0.017	0.00275	0.0106	-0.0256	-0.022	0.000167	-0.04733
9.66667	0.0008	-0.0232	0.0098	-0.0016	-0.00183	-0.003	0.023333	-0.03267	-0.01967	-0.02783	-0.0238	0.013667	0.033667	-0.04367	0.0168	0.0412	0.0314	-0.053	-0.034	-0.018	0.023833	-0.009	-0.02	0.0065	-0.01817	0.022167			-0.0248	0.0192	0.042	0.016	-0.0635	-0.05667	0.044	0.058167							-0.0156	-0.00225	0.011	-0.0274	-0.01233	-0.007	-0.04717
10	-0.0126	-0.0212	0.0054	-0.0074	-0.006	-0.00717	0.019	-0.02633	-0.00083	-0.02917	-0.0268	0.018167	0.027667	-0.02283	0.0258	0.0358	0.038	-0.0534	-0.03867	-0.0216	0.031833	-0.0015	-0.01933	0.002	-0.01333	0.0235			-0.0116	0.0144	0.0358	0.0172	-0.0535	-0.04767	0.0405	0.0495							-0.0162	-0.0005	0.0106	-0.0272	-0.00733	-0.00217	-0.03583
10.3333	-0.0158	-0.0244	-0.0048	-0.0066	-0.01033	-0.00983	0.0115	-0.02933	0.007	-0.02733	-0.0296	0.018167	0.031667	-0.02117	0.0386	0.0282	0.0364	-0.0536	-0.03367	-0.0192	0.034167	-0.005	-0.01683	-0.00333	-0.0085	0.022667			-0.0046	0.0106	0.0308	0.0102	-0.0515	-0.0375	0.0355	0.034667							-0.0106	0.00075	0.0084	-0.027	-0.00233	0.016333	-0.02067
10.6667	-0.0174	-0.0238	-0.0124	-0.007	-0.017	-0.0095	-0.00717	-0.02483	0.001	-0.028	-0.0296	0.016667	0.030333	-0.01133	0.0462	0.0208	0.0324	-0.0526	-0.03117	-0.0342	0.0435	-0.003	-0.01367	-0.012	-0.00883	0.022167			-0.007	0.0102	0.0278	0.0072	-0.04367	-0.04433	0.028	0.025							-0.0068	-0.0005	0.0046	-0.0276	-0.0065	0.017	-0.02083
11	-0.0182	-0.0182	-0.01	-0.0116	-0.01533	-0.012	-0.01917	-0.0215	-0.00833	-0.0255	-0.028	0.016667	0.027667	-0.017	0.048	0.02	0.0232	-0.0536	-0.02833	-0.0332	0.050333	-0.00433	-0.00933	-0.018	-0.007	0.022667			-0.0112	0.012	0.0154	0.0008	-0.03883	-0.03383	0.019333	0.004167							-0.0072	-0.00275	-0.0014	-0.0256	-0.00667	0.008	-0.02633
11.3333	-0.0294	-0.0106	-0.0124	-0.0144	-0.01767	-0.01633	-0.03683	-0.0135	-0.00367	-0.0225	-0.033	0.0135	0.028167	-0.01733	0.0394	0.0246	0.0154	-0.0538	-0.02367	-0.026	0.040667	-0.0095	-0.00767	-0.01717	-0.00733	0.018667			-0.0122	0.0114	0.0062	-0.0058	-0.02717	-0.0335	0.014	-0.01217							-0.01	-0.00225	0.0002	-0.0178	-0.007	0.003167	-0.02467
11.6667	-0.0272	-0.0072	-0.0076	-0.0148	-0.0165	-0.02217	-0.037	-0.01167	-0.004	-0.02033	-0.007	0.005333	0.007	-0.00867	0.0298	0.0294	0.0098	-0.0498	-0.0235	-0.015	0.034333	-0.01117	-0.00833	-0.01017	-0.006	0.013333			-0.0048	0.002	0.0014	-0.006	-0.01583	-0.0275	0.007	-0.01383							-0.0142	-0.0035	0.0012	-0.0134	-0.00567	0.001333	-0.028
12	-0.0142	-0.001	-0.0136	-0.012	-0.01417	-0.01867	-0.02833	-0.00733	-0.00733	-0.01617	0	-0.0025	0.015167	-0.00667	0.016	0.021	0.0066	-0.0442	-0.02083	-0.0132	0.022833	-0.01733	-0.00833	-0.006	-0.0075	0.005333			-0.0004	-0.0086	-0.0066	-0.003	-0.00917	-0.0225	-0.00133	-0.0115							-0.0136	-0.0045	1.11e-17	-0.0102	-0.00317	-0.0055	-0.02317
12.3333	-0.0074	0.0014	-0.0088	-0.0046	-0.0085	-0.013	-0.01217	-0.003	-0.00683	-0.00967	-0.001	-0.00083	0.006	-0.0035	0.0036	0.0164	0.01	-0.0324	-0.01717	-0.0098	0.009	-0.01917	-0.00483	-0.0075	-0.00817	0.001667			-0.0006	-0.0158	-0.0096	-0.0092	-0.00267	-0.02117	-0.00317	-0.00567							-0.0086	0.001	-0.0022	-0.0062	0.000833	-0.012	-0.01567
12.6667	0	0	0	0	0	0	0	0	0	0	0	0	0	0	-0.0016	0.0038	0.0044	-0.0174	-0.0125	-0.0066	0.000833	-0.0115	-0.00117	-0.00467	-0.00517	0.001167			-0.0022	-0.0088	-0.0054	-0.006	0.002167	-0.01217	-0.00117	0.000667							-0.012	0.002	-0.0034	-0.0116	0.000667	-0.009	-0.0085
13	0.0046	0.003	0.0076	0.0056	0.0095	0.0145	0.000667	0.004667	0.006667	0.0035	0.0008	0.012667	-0.00017	0.001	0	0	0	0	0	0	0	0	0	0	0	0			0	0	0	0	0	0	0	0							0	0	0	0	0	0	0
13.3333	0.013	0.0098	0.0098	0.0102	0.012167	0.024333	0.010167	0.012	0.016667	0.007167	0.0032	0.015833	-0.00117	0.002333	0.0008	0.0042	0.0056	0.0114	0.021167	0.0192	0.009667	0.004833	0.001	0.010667	0.0145	0.002			0.007	0.0026	0.0118	0.0036	-0.01217	-0.00017	0.005167	0.008167							0.0034	0.00175	0.0028	-0.0002	0.004667	0.008	0.006833
13.6667	0.0226	0.0192	0.0174	0.02	0.006833	0.032333	0.021333	0.020667	0.025	0.0145	0.0118	0.028667	0.003	0.005167	-0.001	0.0016	0.0148	0.0172	0.0355	0.0292	0.025167	0.01	-0.00133	0.0275	0.023	0.012			0.013	0.005	0.0154	0.014	-0.01833	0.002833	0.008833	0.022667							0.0052	0.004	0.0082	-0.0032	0.005667	0.014	0.0155
14	0.0342	0.0196	0.037	0.0274	0.012667	0.042667	0.029833	0.0215	0.037	0.023667	0.0188	0.048667	0.014833	0.008333	-0.003	0.0136	0.0226	0.025	0.042333	0.038	0.0455	0.013333	0	0.040667	0.0325	0.020167			0.017	0.02	0.0288	0.0142	-0.02817	0.025833	0.0175	0.0425							0.0086	0.00575	0.014	-0.008	0.007	0.021667	0.021
14.3333	0.0452	0.0236	0.0522	0.0344	0.0245	0.0525	0.036667	0.021833	0.049833	0.035	0.0272	0.0695	0.026333	0.011167	-0.005	0.0248	0.032	0.0314	0.051833	0.051	0.071833	0.023333	0.003	0.050833	0.037833	0.027			0.0346	0.0348	0.043	0.0184	-0.02433	0.0515	0.035333	0.059							0.0102	0.00725	0.0258	0.001	0.013333	0.022167	0.023833
14.6667	0.0552	0.034	0.064	0.0374	0.043667	0.067833	0.0455	0.0295	0.067167	0.054333	0.0392	0.082833	0.034833	0.0125	0.0014	0.0294	0.0368	0.0424	0.060833	0.0622	0.091	0.0365	0.010667	0.062833	0.038167	0.0335			0.0624	0.0492	0.0584	0.0248	-0.01217	0.066	0.051667	0.075667							0.0112	0.00925	0.0362	0.0046	0.029	0.0315	0.025
15	0.0654	0.0396	0.083	0.0446	0.0575	0.076167	0.048	0.034667	0.0885	0.0685	0.0506	0.097333	0.042	0.015333	0.0076	0.0366	0.045	0.0476	0.073	0.0658	0.110167	0.045333	0.020833	0.074667	0.0385	0.034			0.0888	0.0568	0.0824	0.0328	0.010333	0.069833	0.062	0.097167							0.02	0.00925	0.041	0.0034	0.034667	0.038833	0.016333
15.3333	0.078	0.0534	0.0992	0.048	0.067667	0.085333	0.0505	0.037	0.1095	0.084333	0.0622	0.109	0.0535	0.0205	0.0152	0.0412	0.0616	0.0514	0.0865	0.0742	0.126333	0.052667	0.0265	0.0885	0.044167	0.0375			0.109	0.068	0.1142	0.0488	0.027667	0.072833	0.075167	0.118667							0.0242	0.013	0.0546	0.0036	0.044167	0.035	0.011167
15.6667	0.087	0.0718	0.1194	0.0552	0.078667	0.096667	0.063	0.037333	0.134333	0.1	0.0736	0.123667	0.064333	0.027	0.024	0.0508	0.066	0.0592	0.096	0.0918	0.1415	0.059833	0.0365	0.098667	0.050333	0.040167			0.1296	0.081	0.1516	0.0652	0.048167	0.0735	0.085833	0.141167							0.034	0.018	0.065	0.0008	0.047	0.039333	0.005
16	0.0936	0.0946	0.1352	0.063	0.083333	0.107333	0.0755	0.041833	0.1495	0.114833	0.0844	0.137833	0.076333	0.0305	0.0266	0.073	0.0712	0.068	0.104	0.1018	0.155	0.064333	0.046167	0.1015	0.058167	0.046167			0.154	0.101	0.1842	0.0838	0.0685	0.09	0.094333	0.166333							0.0362	0.02125	0.0686	-0.001	0.054667	0.044333	-0.00183
16.3333	0.099	0.1132	0.1478	0.0672	0.084667	0.112	0.087167	0.047	0.161	0.127667	0.0914	0.152333	0.088333	0.033833	0.0266	0.0874	0.0734	0.0762	0.1125	0.1064	0.168833	0.069833	0.056667	0.112	0.0645	0.0495			0.175	0.1104	0.2152	0.1078	0.09	0.103333	0.113667	0.187833							0.0416	0.0235	0.0696	-0.0054	0.059	0.0535	-0.004
16.6667	0.1048	0.1254	0.164	0.075	0.1055	0.113667	0.1005	0.051667	0.166	0.141333	0.0974	0.165167	0.096167	0.037	0.03	0.0956	0.0784	0.0822	0.117	0.1126	0.183667	0.080667	0.064333	0.1225	0.069333	0.053833			0.1926	0.1132	0.2442	0.1268	0.107667	0.102833	0.136833	0.212167							0.047	0.02175	0.0718	-0.0056	0.0575	0.0605	-0.0085
17	0.1098	0.1386	0.1758	0.0814	0.121167	0.123333	0.1045	0.050333	0.1695	0.152167	0.1006	0.1765	0.104833	0.038833	0.0348	0.106	0.0858	0.0876	0.116333	0.1104	0.193333	0.089833	0.068333	0.127	0.073333	0.057667			0.2106	0.113	0.268	0.152	0.122333	0.0965	0.161833	0.234667							0.049	0.01925	0.0734	-0.0062	0.054667	0.065333	-0.00683
17.3333	0.114	0.145	0.1844	0.0876	0.126833	0.129	0.114	0.048833	0.175667	0.162667	0.1028	0.186833	0.1125	0.040167	0.0376	0.1098	0.089	0.0938	0.119667	0.0974	0.208167	0.094167	0.070667	0.1295	0.076667	0.060667			0.2298	0.1206	0.2914	0.1716	0.135833	0.105167	0.175333	0.252833							0.0538	0.02125	0.0828	-0.0076	0.051833	0.072667	-0.00167
17.6667	0.1246	0.1554	0.1904	0.0952	0.132833	0.132	0.134833	0.0515	0.1805	0.173167	0.108	0.198	0.120333	0.043	0.0396	0.1074	0.091	0.0948	0.121833	0.0946	0.215	0.094667	0.077833	0.130833	0.079333	0.063			0.2402	0.127	0.3112	0.1906	0.147	0.12	0.1915	0.281167							0.055	0.0155	0.0852	-0.0172	0.048833	0.073333	0.0015
18	0.1308	0.1664	0.194	0.102	0.132167	0.137333	0.138333	0.056333	0.187333	0.184	0.1108	0.206	0.127667	0.046	0.0484	0.1072	0.0958	0.0874	0.122167	0.0924	0.219833	0.097167	0.0845	0.128333	0.078	0.063			0.2464	0.1374	0.331	0.2004	0.160167	0.1265	0.2095	0.3075							0.061	0.0145	0.0854	-0.022	0.044667	0.076167	-0.00183
18.3333	0.138	0.1752	0.2024	0.1096	0.133333	0.1445	0.135	0.058	0.185	0.189833	0.1128	0.216333	0.131667	0.0515	0.0608	0.1094	0.1016	0.0854	0.1195	0.092	0.225667	0.096167	0.088	0.1345	0.080333	0.066833			0.2508	0.1508	0.3424	0.2048	0.1745	0.123833	0.228667	0.326833							0.0614	0.01525	0.0874	-0.0232	0.038667	0.077	-0.00083
18.6667	0.1426	0.183	0.2134	0.1124	0.134333	0.149333	0.137	0.058833	0.187	0.190833	0.12	0.225833	0.133333	0.054333	0.0676	0.1096	0.1082	0.0904	0.118833	0.0824	0.223833	0.0935	0.089667	0.138833	0.082333	0.0675			0.2602	0.158	0.3564	0.2116	0.188167	0.125	0.238	0.3415							0.0628	0.016	0.0926	-0.0306	0.0325	0.068667	-0.00417
19	0.1418	0.1978	0.2258	0.1134	0.1375	0.150667	0.1325	0.0645	0.182833	0.196333	0.1238	0.234	0.134333	0.0565	0.066	0.108	0.1118	0.0932	0.119167	0.0748	0.234167	0.087167	0.0885	0.142833	0.084167	0.063667			0.2646	0.1502	0.3752	0.2176	0.198167	0.129667	0.244167	0.352667							0.0664	0.01625	0.1018	-0.034	0.028833	0.072333	-0.00617
19.3333	0.1352	0.2076	0.232	0.1102	0.1415	0.151	0.132667	0.066833	0.183	0.206167	0.1272	0.236167	0.139	0.058667	0.0664	0.104	0.1128	0.0972	0.1235	0.075	0.231833	0.085833	0.084167	0.148667	0.088833	0.066167			0.2642	0.1418	0.3932	0.2234	0.208833	0.121667	0.254833	0.357167							0.068	0.016	0.1094	-0.0372	0.028167	0.072833	-0.001
19.6667	0.134	0.2176	0.2358	0.1094	0.1395	0.152667	0.137667	0.062833	0.176667	0.213667	0.1324	0.241	0.138667	0.061333	0.0652	0.1022	0.1106	0.0938	0.126167	0.062	0.227667	0.079667	0.0805	0.149	0.0935	0.072667			0.2682	0.1288	0.3994	0.227	0.213	0.128333	0.2655	0.362833							0.0664	0.0175	0.1116	-0.0402	0.029	0.068667	0.007167
20	0.138	0.2184	0.2372	0.1104	0.132833	0.152833	0.127	0.069167	0.178667	0.218667	0.1352	0.247833	0.140833	0.063667	0.0604	0.108	0.1092	0.0894	0.121667	0.0538	0.231167	0.079333	0.079333	0.152167	0.0975	0.075167			0.2694	0.112	0.4024	0.2276	0.211	0.126333	0.2695	0.3625							0.0676	0.01825	0.107	-0.0484	0.0275	0.0685	0.013
20.3333	0.14	0.217	0.2426	0.1088	0.1315	0.150833	0.127	0.071	0.173	0.226833	0.1424	0.2525	0.145	0.065	0.0668	0.1194	0.1096	0.0834	0.1185	0.0462	0.237	0.079167	0.078667	0.153167	0.099	0.075167			0.2762	0.096	0.401	0.2344	0.212833	0.126333	0.273333	0.355167							0.0712	0.01775	0.106	-0.057	0.0285	0.068833	0.009667
20.6667	0.1428	0.2156	0.2474	0.1048	0.131833	0.149333	0.1205	0.0745	0.174	0.2295	0.1506	0.2545	0.153333	0.066167	0.076	0.1298	0.1092	0.0792	0.121833	0.062	0.237333	0.0765	0.079	0.154167	0.099	0.076			0.2882	0.0972	0.4034	0.238	0.217167	0.1335	0.282833	0.347833							0.0724	0.0205	0.1068	-0.0626	0.031	0.0695	0.012167
21	0.1462	0.2154	0.2488	0.1076	0.138167	0.144	0.122333	0.076167	0.1765	0.236333	0.1534	0.256	0.160833	0.059167	0.0812	0.1294	0.1142	0.0862	0.120333	0.0698	0.239333	0.0745	0.080167	0.158167	0.099167	0.072667			0.294	0.117	0.4056	0.2366	0.218667	0.126833	0.285833	0.341667							0.0718	0.02475	0.1064	-0.064	0.0305	0.070167	0.008167
21.3333	0.1514	0.2164	0.2492	0.1106	0.139167	0.148	0.131667	0.0755	0.182	0.243167	0.1536	0.261333	0.163333	0.0525	0.0782	0.129	0.1114	0.0844	0.115	0.0764	0.247833	0.067	0.081	0.154333	0.103333	0.073833			0.2864	0.1342	0.4096	0.2338	0.227667	0.123667	0.2815	0.340667							0.067	0.02725	0.1008	-0.063	0.032	0.0665	0.009667
21.6667	0.1542	0.22	0.249	0.109	0.141833	0.1515	0.1405	0.075167	0.183333	0.246	0.16	0.268	0.168833	0.054	0.0838	0.12	0.104	0.0808	0.116833	0.065	0.257	0.072667	0.082	0.155167	0.103667	0.082667			0.2834	0.1328	0.4106	0.2276	0.227667	0.130333	0.282167	0.340667							0.0648	0.02925	0.1024	-0.0638	0.029167	0.066833	0.012
22	0.1544	0.2184	0.2554	0.107	0.143	0.152167	0.138833	0.075167	0.181167	0.248167	0.1668	0.2705	0.173	0.0505	0.0838	0.1224	0.1036	0.0834	0.111667	0.0668	0.254667	0.075833	0.080833	0.163833	0.106833	0.086167			0.2812	0.1252	0.4134	0.217	0.229167	0.136667	0.289167	0.3395							0.0574	0.0285	0.104	-0.0642	0.0275	0.058	0.010833
22.3333	0.1578	0.2118	0.2588	0.1068	0.133667	0.150167	0.148333	0.072833	0.179333	0.248833	0.1718	0.272167	0.174333	0.0545	0.0818	0.1252	0.1062	0.0904	0.104833	0.0708	0.255167	0.074833	0.080833	0.168167	0.104	0.085			0.2772	0.1136	0.411	0.2082	0.2315	0.140833	0.29	0.340167							0.0542	0.0275	0.109	-0.0646	0.026833	0.051167	0.007833
22.6667	0.1586	0.2058	0.2504	0.107	0.118333	0.144167	0.149	0.071	0.178167	0.248667	0.1718	0.275	0.1795	0.0545	0.0804	0.124	0.1092	0.0982	0.094833	0.0726	0.2515	0.0675	0.078333	0.164667	0.1005	0.082833			0.2734	0.0874	0.4092	0.2048	0.236833	0.139667	0.292667	0.332							0.0478	0.02125	0.1136	-0.0672	0.026333	0.043833	0.009667
23	0.1618	0.209	0.2432	0.1028	0.110167	0.144333	0.1425	0.067	0.1755	0.247	0.1696	0.270667	0.178167	0.0535	0.0744	0.1194	0.115	0.1052	0.090333	0.0714	0.253667	0.0645	0.073333	0.169667	0.095333	0.088333			0.2718	0.0638	0.4124	0.2008	0.2365	0.13	0.298167	0.3215							0.0406	0.01675	0.1136	-0.0622	0.026167	0.0375	0.016333
23.3333	0.1662	0.2158	0.2426	0.1002	0.107167	0.139833	0.138167	0.062667	0.171333	0.240833	0.1692	0.281	0.1695	0.054833	0.0732	0.1042	0.1148	0.1084	0.084833	0.0764	0.247167	0.063667	0.068	0.164167	0.088333	0.098			0.2698	0.041	0.4152	0.1936	0.231167	0.119833	0.300667	0.312							0.0366	0.0115	0.1178	-0.0546	0.024333	0.035167	0.014833
23.6667	0.1696	0.2154	0.2448	0.1008	0.101833	0.1395	0.138333	0.062333	0.176	0.2395	0.1704	0.280833	0.162833	0.051	0.0704	0.0914	0.1148	0.1052	0.074	0.075	0.226833	0.0585	0.061333	0.162667	0.086667	0.104			0.2564	0.0178	0.415	0.1872	0.228667	0.1045	0.2945	0.295833							0.0228	0.00475	0.1182	-0.0486	0.024667	0.021667	0.013833
24	0.1674	0.2082	0.238	0.0992	0.088667	0.13	0.134167	0.059667	0.168667	0.235667	0.1642	0.2755	0.157833	0.0435	0.0692	0.093	0.111	0.105	0.066167	0.0706	0.208833	0.051667	0.054667	0.1635	0.087667	0.102167			0.238	-0.002	0.414	0.179	0.2235	0.102333	0.289833	0.286333							0.0186	0.0055	0.1254	-0.038	0.025167	0.017333	0.009
24.3333	0.1682	0.1956	0.2302	0.0954	0.081333	0.117333	0.136833	0.055333	0.1595	0.232167	0.1594	0.268	0.148	0.043833	0.0662	0.0888	0.1024	0.104	0.059	0.058	0.205167	0.045167	0.053	0.160667	0.088333	0.105167			0.2138	0.0014	0.4054	0.165	0.208833	0.110833	0.283167	0.274							0.0146	0.0065	0.1338	-0.03	0.027	0.016667	0.003333
24.6667	0.1672	0.1854	0.2214	0.0868	0.074667	0.117	0.1375	0.050333	0.154	0.229667	0.1602	0.266667	0.1375	0.034	0.0688	0.0792	0.0992	0.0984	0.049667	0.0516	0.211	0.034667	0.051	0.163667	0.086833	0.107			0.188	-0.0002	0.3918	0.144	0.190833	0.098833	0.281333	0.267167							0.0106	0.007	0.1396	-0.0266	0.021833	0.0175	-0.0015
25	0.1656	0.1732	0.2138	0.0834	0.0695	0.117	0.132333	0.043833	0.141667	0.227833	0.1604	0.261833	0.1275	0.042833	0.071	0.0784	0.0974	0.0908	0.040167	0.0572	0.2165	0.031667	0.0505	0.160667	0.088167	0.1145			0.1664	-0.0132	0.3856	0.1222	0.177333	0.095833	0.274167	0.2635							0.0124	0.00575	0.1356	-0.025	0.018167	0.0195	-0.0005
25.3333	0.1596	0.1594	0.2078	0.0772	0.061833	0.109833	0.126	0.036	0.135333	0.224167	0.162	0.253667	0.121333	0.028833	0.0688	0.0728	0.0956	0.0798	0.031167	0.0528	0.211	0.033	0.047167	0.1505	0.0775	0.1145			0.1502	-0.0274	0.3756	0.1028	0.159667	0.093833	0.2675	0.246							0.0138	-0.00175	0.1338	-0.0222	0.018667	0.020333	0.0015
25.6667	0.1588	0.152	0.2066	0.065	0.055833	0.102833	0.108667	0.027833	0.1305	0.220833	0.1592	0.244	0.1155	0.0295	0.0576	0.0606	0.1044	0.0672	0.024333	0.0376	0.208	0.0335	0.039833	0.142167	0.073833	0.111167			0.1376	-0.0414	0.3642	0.0872	0.146667	0.0815	0.258167	0.220167							0.0206	-0.0005	0.1352	-0.0198	0.020167	0.020667	0.002667
26	0.1554	0.1486	0.2	0.0564	0.050167	0.0955	0.1045	0.015667	0.112833	0.215833	0.1526	0.235	0.108167	0.029667	0.0514	0.045	0.1162	0.0596	0.014667	0.011	0.1875	0.030167	0.034833	0.135333	0.066833	0.110167			0.1244	-0.055	0.3476	0.0788	0.133167	0.0645	0.246667	0.197167							0.0256	-0.0015	0.133	-0.0178	0.020333	0.025333	-0.0035
26.3333	0.1458	0.1436	0.1944	0.0478	0.046167	0.089167	0.1005	0.012667	0.096	0.212833	0.1434	0.223167	0.1005	0.0245	0.0502	0.038	0.1232	0.0488	0.0075	0.0002	0.167667	0.0275	0.033333	0.128333	0.0645	0.109167			0.1172	-0.0542	0.3406	0.0662	0.124167	0.0595	0.234833	0.182833							0.0296	-0.00475	0.128	-0.0186	0.019333	0.0225	-0.0105
26.6667	0.143	0.1322	0.191	0.0398	0.043167	0.086167	0.0925	0.008833	0.085167	0.207833	0.1502	0.212833	0.080833	0.019167	0.0538	0.0346	0.1276	0.042	0.006	0.0016	0.1575	0.020167	0.029667	0.1225	0.064833	0.107			0.1108	-0.0518	0.3346	0.0552	0.117833	0.050667	0.223	0.1585							0.0344	-0.00675	0.1184	-0.0204	0.021	0.0195	-0.01167
27	0.1378	0.117	0.1742	0.0328	0.039333	0.0815	0.083333	0.009	0.067333	0.2025	0.146	0.2085	0.0665	0.0135	0.0604	0.0294	0.128	0.0318	0.004	-0.0058	0.145	0.0225	0.025333	0.120167	0.060833	0.104833			0.098	-0.0678	0.3328	0.049	0.111	0.047167	0.211	0.139							0.029	-0.01525	0.1084	-0.0228	0.024667	0.016833	-0.00067
27.3333	0.1332	0.0952	0.1654	0.028	0.038833	0.079333	0.072667	0.003333	0.067	0.197167	0.143	0.2025	0.078333	0.014	0.0612	0.0324	0.1292	0.0212	0.004667	-0.0128	0.131333	0.025333	0.0175	0.117333	0.058	0.103833			0.0876	-0.0966	0.3322	0.04	0.104667	0.031167	0.195	0.133333							0.0312	-0.0145	0.1062	-0.0284	0.023333	0.017833	0.002
27.6667	0.1242	0.072	0.1532	0.0252	0.039	0.076	0.057167	-0.00633	0.056	0.190667	0.1416	0.195667	0.077833	0.016167	0.0546	0.0314	0.1284	0.014	0.009333	-0.0258	0.114333	0.023	0.009167	0.113833	0.052167	0.100667			0.0656	-0.1086	0.3314	0.0288	0.093833	0.021333	0.1825	0.127833							0.0322	-0.01325	0.1014	-0.0296	0.023333	0.023833	-0.00683
28	0.1212	0.058	0.1598	0.0218	0.0375	0.069	0.036	-0.00983	0.0525	0.1905	0.1346	0.195833	0.080333	0.014	0.0438	0.0314	0.1324	0.0094	0.010333	-0.034	0.096167	0.020667	0.004667	0.110833	0.044	0.097667			0.0436	-0.117	0.317	0.0222	0.080833	0.002667	0.1745	0.1255							0.0318	-0.00775	0.1028	-0.0306	0.022333	0.034	-0.00683
28.3333	0.1208	0.0466	0.1574	0.0148	0.0385	0.067	0.027167	-0.01767	0.049333	0.191833	0.1268	0.196833	0.086167	0.011	0.0354	0.0284	0.1208	0.0072	0.0075	-0.0376	0.0795	0.020333	0.000667	0.106667	0.038833	0.093833			0.0262	-0.1264	0.3064	0.018	0.0685	-0.0175	0.165333	0.114167							0.031	-0.00075	0.0882	-0.0304	0.018333	0.036	-0.00333
28.6667	0.1182	0.0238	0.1584	0.0056	0.0435	0.066667	0.033667	-0.02467	0.047	0.189	0.1204	0.197667	0.087667	0.009167	0.0356	0.0254	0.1184	-0.0006	0.0055	-0.0388	0.0805	0.023	-0.00033	0.101167	0.040833	0.0915			0.0216	-0.1464	0.3018	0.0108	0.054	-0.03533	0.154	0.0995							0.0344	-0.00025	0.0762	-0.0324	0.016833	0.036	-0.00717
29	0.1158	0.0084	0.1516	-0.0022	0.043667	0.070333	0.037167	-0.03583	0.033667	0.184333	0.1156	0.199	0.091167	0.007167	0.0388	0.0266	0.115	-0.0064	-0.00217	-0.05	0.086	0.021833	-0.0005	0.095167	0.044667	0.0875			0.0216	-0.1642	0.2978	0.0026	0.047	-0.0425	0.138833	0.085							0.0408	-0.00275	0.067	-0.0322	0.016333	0.039333	-0.01033
29.3333	0.1118	0.0092	0.1434	-0.0076	0.041	0.070833	0.036167	-0.045	0.023333	0.182	0.1126	0.195833	0.094833	0.004667	0.0396	0.032	0.1086	-0.009	-0.01333	-0.0516	0.079333	0.0185	-0.00067	0.0845	0.041667	0.0865			0.0208	-0.169	0.2892	-0.0128	0.042333	-0.03617	0.1245	0.066167							0.043	0.001	0.0652	-0.0306	0.016667	0.036833	-0.01233
29.6667	0.116	0.01	0.1392	-0.0114	0.038833	0.070333	0.036333	-0.05767	0.0175	0.178333	0.1096	0.193167	0.093	0.002167	0.0374	0.035	0.0978	-0.0108	-0.02367	-0.0338	0.0715	0.0235	-0.0005	0.074667	0.043667	0.084833			0.0228	-0.1752	0.283	-0.0238	0.033	-0.04083	0.114167	0.042167							0.0442	0.01	0.0622	-0.03	0.017333	0.034667	-0.015
30	0.1114	0.0108	0.1304	-0.0172	0.036667	0.063167	0.035	-0.05167	0.009	0.179167	0.105	0.191333	0.091667	0.001833	0.04	0.0354	0.0908	-0.0088	-0.03833	-0.0254	0.0645	0.026667	-0.003	0.075333	0.047333	0.085833			0.0262	-0.1752	0.2788	-0.0284	0.024667	-0.03833	0.1045	0.019667							0.0408	0.0155	0.0618	-0.0256	0.016667	0.0375	-0.02
30.3333	0.1014	0.0164	0.1192	-0.0242	0.036833	0.059667	0.036	-0.051	0.007333	0.176667	0.1004	0.188	0.085833	0.0025	0.0416	0.0406	0.0892	-0.0074	-0.04483	-0.0244	0.053	0.0155	-0.00317	0.077667	0.0525	0.0875			0.0256	-0.1706	0.2702	-0.0342	0.0135	-0.03833	0.094667	0.009833							0.0278	0.01975	0.0762	-0.0272	0.0165	0.03	-0.01817
30.6667	0.093	0.0278	0.1132	-0.032	0.038167	0.0595	0.029833	-0.05183	0.005333	0.17	0.0992	0.187333	0.078	0.004333	0.0462	0.0314	0.0828	-0.0072	-0.04733	-0.0182	0.052333	0.004833	-0.00117	0.079	0.049333	0.090833			0.018	-0.1738	0.255	-0.0446	-0.00133	-0.04667	0.083833	-0.01217							0.0174	0.021	0.082	-0.0318	0.015	0.030833	-0.03083
31	0.0892	0.034	0.117	-0.038	0.035	0.0615	0.0335	-0.052	0.002667	0.166	0.0992	0.183	0.068833	0.002667	0.0498	0.0238	0.0878	-0.0072	-0.044	-0.0142	0.049167	-0.00467	-0.00367	0.076	0.044	0.0925			0.0082	-0.1742	0.2382	-0.0522	-0.01633	-0.05483	0.0775	-0.01							0.0122	0.02325	0.0724	-0.0342	0.011833	0.030333	-0.04367
31.3333	0.0834	0.036	0.1192	-0.0382	0.033167	0.064833	0.042167	-0.05317	0.003333	0.161833	0.096	0.177	0.063833	-0.001	0.0536	0.0346	0.0942	-0.0022	-0.03667	-0.0276	0.048333	-0.01567	-0.00517	0.071333	0.035333	0.089167			-0.0012	-0.1734	0.2298	-0.0572	-0.0255	-0.0675	0.080167	-0.00517							0.0072	0.022	0.0636	-0.032	0.008333	0.0345	-0.05817
31.6667	0.0778	0.036	0.1198	-0.0382	0.032	0.0665	0.044833	-0.05283	-0.006	0.1595	0.096	0.170167	0.064333	-0.00367	0.0552	0.0484	0.0896	0.0044	-0.03267	-0.0276	0.0435	-0.01617	-0.0065	0.066333	0.034167	0.079333			-0.0152	-0.1776	0.2246	-0.0592	-0.02783	-0.07483	0.080333	-0.00417							0.0026	0.018	0.0614	-0.0296	0.009	0.032167	-0.073
32	0.0736	0.0332	0.1224	-0.0392	0.029833	0.0645	0.041	-0.049	-0.013	0.153833	0.0982	0.1595	0.062	-0.004	0.0598	0.0586	0.0798	0.0056	-0.03267	-0.0314	0.045667	-0.01667	-0.00517	0.0625	0.036333	0.071333			-0.0312	-0.1818	0.219	-0.061	-0.03167	-0.0865	0.0775	-0.00883							0.005	0.01325	0.0644	-0.0292	0.009	0.037	-0.08217
32.3333	0.0718	0.0278	0.1256	-0.0404	0.023833	0.057333	0.045	-0.04633	-0.01767	0.149667	0.097	0.149667	0.061333	-0.00767	0.067	0.0636	0.0704	0.0094	-0.03367	-0.036	0.052833	-0.01867	-0.00467	0.055	0.044333	0.0705			-0.0454	-0.1832	0.2052	-0.0634	-0.03267	-0.09367	0.075667	-0.01417							0.0032	0.0115	0.068	-0.0254	0.008	0.040167	-0.08933
32.6667	0.0742	0.0186	0.125	-0.0418	0.012833	0.0565	0.044	-0.04417	-0.01967	0.1435	0.0938	0.142	0.058167	-0.0105	0.0752	0.0718	0.062	0.0156	-0.02933	-0.032	0.051667	-0.01683	-0.00417	0.048833	0.058	0.066667			-0.0556	-0.1824	0.1956	-0.0664	-0.0355	-0.09283	0.072167	-0.0145							0.0032	0.0095	0.0712	-0.0206	0.0015	0.037667	-0.08883
33	0.0718	0.0126	0.1262	-0.0426	0.011667	0.050167	0.047333	-0.045	-0.0135	0.135667	0.0904	0.1265	0.055667	-0.00917	0.0728	0.0706	0.0488	0.021	-0.02533	-0.025	0.051333	-0.0155	-0.002	0.0485	0.063333	0.063			-0.0632	-0.179	0.1884	-0.0672	-0.03383	-0.09433	0.074167	-0.014							-0.0032	0.0055	0.0686	-0.0172	-0.00317	0.034167	-0.0885
33.3333	0.0652	0.0056	0.1264	-0.044	0.016	0.047	0.046667	-0.0445	-0.013	0.130667	0.0886	0.121667	0.056167	-0.01117	0.063	0.0696	0.0356	0.0256	-0.01833	-0.0218	0.050667	-0.01467	-0.00283	0.042667	0.066167	0.057667			-0.0668	-0.1778	0.1826	-0.069	-0.03383	-0.09733	0.080333	-0.0115							0.009	0.00525	0.0664	-0.0152	-0.005	0.030833	-0.089
33.6667	0.0588	-0.0044	0.1206	-0.0396	0.013333	0.044667	0.040833	-0.04817	-0.02017	0.130667	0.087	0.121667	0.059667	-0.013	0.0572	0.0708	0.0362	0.0262	-0.007	-0.0256	0.0485	-0.01333	-0.00733	0.039	0.067167	0.0525			-0.066	-0.1726	0.179	-0.0714	-0.02817	-0.10067	0.081333	-0.0065							0.004	0.01275	0.0634	-0.0166	-0.00533	0.0295	-0.09483
34	0.0564	-0.001	0.1092	-0.0338	0.008667	0.046167	0.036667	-0.0515	-0.03283	0.132333	0.0844	0.121833	0.059	-0.01183	0.0514	0.0712	0.031	0.0228	0.0025	-0.0368	0.051333	-0.01667	-0.0105	0.039167	0.067167	0.053167			-0.0728	-0.1712	0.1696	-0.0722	-0.02367	-0.10317	0.0775	-0.0065							0.0078	0.0115	0.0586	-0.018	-0.00467	0.022833	-0.09867
34.3333	0.0566	0.0082	0.1072	-0.0308	0.004	0.0475	0.026	-0.05583	-0.042	0.136667	0.0828	0.119	0.053167	-0.00783	0.0508	0.069	0.027	0.023	0.0035	-0.0366	0.056833	-0.024	-0.01033	0.038667	0.0635	0.0505			-0.0752	-0.1754	0.164	-0.067	-0.02483	-0.08283	0.071833	-0.00217							0.01	0.00975	0.0542	-0.0166	-0.00083	0.013833	-0.08817
34.6667	0.056	0.0166	0.1082	-0.0266	-0.00017	0.043333	0.021167	-0.05917	-0.0485	0.137667	0.0814	0.119	0.047833	-0.007	0.0566	0.0576	0.025	0.0264	0.003833	-0.0378	0.051667	-0.02667	-0.0155	0.0385	0.0595	0.051			-0.0808	-0.1764	0.1604	-0.0668	-0.034	-0.06783	0.063333	-0.002							0.0092	0.0075	0.0518	-0.0156	0.004333	0.008333	-0.08517
35	0.051	0.0204	0.1024	-0.0208	-0.0015	0.041167	0.025833	-0.06183	-0.05567	0.134833	0.0844	0.119833	0.043167	-0.0055	0.0694	0.0504	0.0288	0.0284	0.006833	-0.0248	0.051833	-0.03433	-0.01967	0.034167	0.055167	0.055333			-0.0906	-0.179	0.1548	-0.069	-0.03917	-0.07783	0.057333	0.006							0.0126	0.00875	0.056	-0.0168	0.001833	0.007167	-0.07917
35.3333	0.048	0.0246	0.1046	-0.0162	-0.001	0.045833	0.023333	-0.063	-0.06017	0.1365	0.0812	0.116833	0.040333	-0.00083	0.0738	0.0494	0.0236	0.029	0.012167	-0.0186	0.0535	-0.03517	-0.0205	0.029667	0.060667	0.057667			-0.0968	-0.175	0.1532	-0.0756	-0.04117	-0.0815	0.0515	0.013833							0.0138	0.0105	0.0606	-0.021	-0.00467	0.011333	-0.07333
35.6667	0.0484	0.0266	0.1068	-0.014	0.002167	0.0505	0.0255	-0.06233	-0.065	0.1355	0.0748	0.114667	0.036833	0.001167	0.0752	0.0512	0.0178	0.0334	0.015167	-0.0166	0.053833	-0.03983	-0.015	0.031	0.0685	0.0635			-0.097	-0.1746	0.155	-0.0836	-0.04017	-0.0775	0.039833	0.019667							0.0128	0.00525	0.055	-0.0134	-0.0075	0.000667	-0.06317
36	0.0556	0.0254	0.1014	-0.0118	0.0055	0.055333	0.026667	-0.0595	-0.06683	0.135667	0.0704	0.117	0.027833	0.001833	0.0732	0.048	0.0126	0.037	0.014667	-0.0098	0.053833	-0.04667	-0.01217	0.030167	0.071667	0.0655			-0.0938	-0.163	0.1512	-0.0962	-0.03383	-0.08483	0.031667	0.023167							0.0078	0.00175	0.0556	-0.01	-0.0125	-0.00317	-0.0545
36.3333	0.06	0.0228	0.0994	-0.0084	0.006667	0.056	0.027	-0.06017	-0.066	0.1345	0.0684	0.115833	0.017833	0.005	0.072	0.0486	0.013	0.0388	0.011167	-0.0036	0.055167	-0.04683	-0.01167	0.025833	0.0745	0.067167			-0.0954	-0.1442	0.1526	-0.111	-0.03367	-0.0875	0.0225	0.011667							0.0138	0.001	0.0592	-0.0082	-0.01283	-0.0015	-0.05033
36.6667	0.0576	0.0184	0.0934	-0.011	0.005167	0.057333	0.033333	-0.06083	-0.06417	0.133	0.0684	0.121333	0.0065	0.005833	0.0734	0.0546	0.0148	0.0422	0.005333	-0.0062	0.053333	-0.04333	-0.01383	0.027333	0.0745	0.0705			-0.0966	-0.1344	0.1568	-0.1162	-0.03717	-0.0865	0.017667	-0.01017							0.0184	0.001	0.0556	-0.0122	-0.01117	-0.00767	-0.05517
37	0.0554	0.0058	0.0912	-0.0116	0.001	0.056833	0.029167	-0.06067	-0.065	0.133667	0.067	0.121833	0.002	0.006333	0.0726	0.059	0.0078	0.0524	-0.00883	-0.0062	0.054167	-0.04283	-0.01533	0.0305	0.072167	0.0725			-0.106	-0.1402	0.1628	-0.1156	-0.0405	-0.08217	0.0175	-0.0055							0.019	-0.00525	0.0448	-0.0172	-0.0155	-0.00783	-0.05817
37.3333	0.0524	-0.0028	0.0904	-0.0116	-0.00367	0.055167	0.031667	-0.06133	-0.05717	0.135833	0.0672	0.120167	-0.00383	0.004833	0.065	0.0518	-0.0078	0.0568	-0.01867	0.0076	0.057667	-0.04383	-0.01533	0.028	0.069833	0.0695			-0.1098	-0.143	0.1718	-0.109	-0.04317	-0.09267	0.02	-0.00333							0.0168	-0.00675	0.05	-0.02	-0.0145	-0.00867	-0.056
37.6667	0.0512	-0.008	0.0854	-0.0082	-0.01133	0.058	0.035333	-0.0595	-0.0495	0.134833	0.0648	0.120667	-0.01017	0.001833	0.0562	0.046	-0.0158	0.0564	-0.025	0.0052	0.064	-0.044	-0.01267	0.0255	0.067333	0.069167			-0.1154	-0.146	0.1676	-0.0986	-0.04967	-0.10667	0.016	0.008333							0.013	-0.00575	0.051	-0.021	-0.01183	-0.00683	-0.04833
38	0.0512	-0.0164	0.0762	-0.0066	-0.01583	0.056833	0.036667	-0.05883	-0.04933	0.137833	0.0606	0.125667	-0.01633	-0.00283	0.0476	0.0462	-0.0184	0.0566	-0.02683	-0.0104	0.067667	-0.04517	-0.0035	0.027833	0.063167	0.073333			-0.1216	-0.1562	0.16	-0.0912	-0.05183	-0.10367	0.0115	0.013167							0.0076	-0.0055	0.0502	-0.0216	-0.00667	-0.00633	-0.04617
38.3333	0.0532	-0.0244	0.0674	-0.0036	-0.01767	0.052	0.032333	-0.05867	-0.06883	0.1405	0.0556	0.1305	-0.01783	-0.007	0.048	0.0454	-0.0218	0.0598	-0.02567	-0.019	0.061167	-0.0495	0.000167	0.025833	0.056167	0.075333			-0.1294	-0.165	0.1544	-0.0858	-0.05283	-0.09433	0.018333	0.019333							0.007	-0.001	0.0494	-0.0208	-0.00433	0.001333	-0.04583
38.6667	0.0598	-0.0266	0.063	0.0008	-0.02	0.049667	0.0295	-0.06183	-0.077	0.142	0.0514	0.128833	-0.023	-0.0105	0.0556	0.0456	-0.0198	0.0604	-0.03	-0.0348	0.060667	-0.0435	-0.002	0.022	0.0465	0.068667			-0.1344	-0.1742	0.1534	-0.0854	-0.0575	-0.09017	0.021	0.025833							0.0114	0.00075	0.0518	-0.025	-0.007	0.003333	-0.0485
39	0.0678	-0.0274	0.061	0.0052	-0.02417	0.042167	0.03	-0.06767	-0.0755	0.146333	0.0454	0.1315	-0.02267	-0.006	0.0654	0.044	-0.0188	0.0492	-0.0305	-0.0636	0.066833	-0.0405	-0.00133	0.019167	0.044	0.064833			-0.1358	-0.1748	0.1544	-0.0856	-0.0595	-0.08433	0.023	0.033667							0.0118	-0.00125	0.0564	-0.0248	-0.01083	0.001833	-0.053
39.3333	0.0726	-0.0312	0.0554	0.0086	-0.02367	0.043	0.023167	-0.07133	-0.08083	0.147667	0.0456	0.129167	-0.0215	-0.005	0.0652	0.042	-0.011	0.0342	-0.0315	-0.0666	0.071667	-0.03667	0.000667	0.016167	0.038833	0.0635			-0.1338	-0.1654	0.1524	-0.081	-0.0525	-0.08417	0.020333	0.040667							0.0114	-0.0015	0.0592	-0.0262	-0.01133	0.003333	-0.0585
39.6667	0.077	-0.028	0.0642	0.0088	-0.0245	0.046667	0.017667	-0.06867	-0.07667	0.148667	0.0438	0.116667	-0.02067	-0.0075	0.0592	0.0392	-0.015	0.0278	-0.02633	-0.0732	0.076833	-0.03167	0.002	0.017333	0.040167	0.062667			-0.124	-0.1536	0.1422	-0.0742	-0.056	-0.09117	0.013333	0.038667							0.0178	-0.0055	0.0648	-0.0274	-0.0095	0.005667	-0.05967
40	0.0776	-0.0182	0.0666	0.009	-0.024	0.049167	0.0175	-0.06167	-0.07517	0.149667	0.037	0.1085	-0.013	-0.00983	0.0552	0.0296	-0.02	0.0296	-0.0225	-0.08	0.080667	-0.03083	0.002167	0.018167	0.046667	0.0655			-0.1116	-0.1476	0.1336	-0.0708	-0.05717	-0.10067	0.008333	0.0385							0.0224	-0.00975	0.0708	-0.0262	-0.0145	0.003667	-0.05383
40.3333	0.077	-0.0146	0.0604	0.0118	-0.02033	0.051167	0.017167	-0.05717	-0.06967	0.148667	0.0302	0.0945	-0.00633	-0.009	0.0484	0.0234	-0.0186	0.0266	-0.02183	-0.0794	0.085	-0.02567	0.005833	0.0145	0.047167	0.067833			-0.0898	-0.1364	0.129	-0.0746	-0.06183	-0.0975	0.003833	0.036167							0.0164	-0.01425	0.0796	-0.0288	-0.018	-0.00117	-0.05933
40.6667	0.076	-0.0174	0.0606	0.0162	-0.0135	0.044	0.0155	-0.05183	-0.068	0.148	0.0304	0.087333	-0.00117	-0.0105	0.0478	0.0182	-0.0154	0.023	-0.01483	-0.0576	0.083667	-0.02717	0.008	0.012333	0.0455	0.063			-0.0802	-0.13	0.1204	-0.081	-0.059	-0.10567	-0.00067	0.033							0.0138	-0.01825	0.0848	-0.0298	-0.01183	-0.00217	-0.05767
41	0.0744	-0.0138	0.0626	0.0174	-0.00717	0.045	0.016	-0.05033	-0.07783	0.153833	0.029	0.083	0.002667	-0.009	0.0476	0.023	-0.0034	0.0248	-0.00633	-0.061	0.08	-0.026	0.006	0.0085	0.048667	0.057167			-0.0774	-0.1324	0.1128	-0.0846	-0.05417	-0.11283	-0.009	0.025							-0.0086	-0.022	0.0906	-0.027	-0.01433	0.006667	-0.061
41.3333	0.0756	-0.0134	0.0538	0.0148	-0.007	0.0475	0.014833	-0.04883	-0.07167	0.157	0.0326	0.0795	0.006333	-0.00717	0.0482	0.0302	0.008	0.0224	-0.00267	-0.0738	0.073833	-0.01733	0.0025	0.011	0.05	0.060333			-0.0798	-0.1358	0.1132	-0.0896	-0.05317	-0.112	-0.01167	0.014167							-0.0096	-0.023	0.094	-0.025	-0.01867	0.003333	-0.05517
41.6667	0.0808	-0.0184	0.0392	0.014	-0.00667	0.047	0.012833	-0.04883	-0.06267	0.157	0.0324	0.081833	0.010333	-0.00867	0.0508	0.0236	0.0068	0.024	-0.00317	-0.0838	0.0675	-0.01617	0.0005	0.016667	0.047667	0.065			-0.0874	-0.1368	0.1154	-0.0962	-0.0535	-0.11867	-0.01567	0.0055							-0.007	-0.02375	0.102	-0.0258	-0.01883	-0.0005	-0.042
42	0.0862	-0.024	0.0348	0.0132	0.000167	0.043	0.019167	-0.04783	-0.065	0.161667	0.0336	0.090167	0.016333	-0.01033	0.0498	0.007	0.003	0.0256	-0.00017	-0.0796	0.062333	-0.01933	-0.00117	0.013	0.0485	0.074333			-0.0912	-0.1274	0.1164	-0.0998	-0.05183	-0.1405	-0.01933	0.001667							-1.11e-17	-0.023	0.1042	-0.0302	-0.01883	-0.00533	-0.036
42.3333	0.0834	-0.022	0.0372	0.0114	0.0035	0.0445	0.020333	-0.04717	-0.05917	0.163833	0.0326	0.091167	0.019	-0.008	0.0376	0.0042	-0.0012	0.0308	0.002833	-0.076	0.0655	-0.01717	0.000833	0.012833	0.0465	0.075			-0.0928	-0.111	0.1142	-0.0998	-0.04817	-0.16067	-0.02233	0.000333							-0.0032	-0.02075	0.0938	-0.0358	-0.0175	-0.00667	-0.03317
42.6667	0.0858	-0.0146	0.0412	0.0086	0.002833	0.047167	0.020333	-0.04367	-0.05467	0.168667	0.0282	0.085167	0.0185	-0.0045	0.0244	0.017	0.0016	0.0342	0.0005	-0.0568	0.074667	-0.01317	0.005167	0.012667	0.045667	0.078167			-0.0904	-0.0968	0.1146	-0.1032	-0.053	-0.16033	-0.0235	0.0075							-0.0108	-0.02375	0.094	-0.0432	-0.01117	-0.00883	-0.03383
43	0.082	-0.011	0.044	0.005	-0.003	0.052667	0.0295	-0.046	-0.06083	0.169667	0.028	0.077667	0.014167	-0.00067	0.0122	0.028	0.012	0.0308	-0.003	-0.057	0.082	-0.013	0.0075	0.0115	0.0475	0.0815			-0.0914	-0.0968	0.1072	-0.1076	-0.061	-0.172	-0.019	0.01							-0.0022	-0.02175	0.0998	-0.0518	-0.00383	-0.015	-0.03567
43.3333	0.0736	-0.0134	0.0544	0.002	0.000167	0.0515	0.0355	-0.05183	-0.062	0.167333	0.031	0.073833	-0.00383	0.001833	0.0054	0.04	0.0158	0.0278	-0.00233	-0.0656	0.0875	-0.0135	0.0095	0.009333	0.050833	0.075167			-0.0854	-0.1014	0.099	-0.1106	-0.063	-0.18567	-0.009	0.014333							0.013	-0.02225	0.102	-0.0556	0.002333	-0.017	-0.033
43.6667	0.0672	-0.0196	0.056	0.0016	0.003667	0.0595	0.041833	-0.05217	-0.056	0.162333	0.0328	0.072167	-0.0015	0.0055	0.0034	0.0512	0.0152	0.0218	0.001833	-0.069	0.089667	-0.01133	0.010167	-0.00917	0.0505	0.0755			-0.0726	-0.0982	0.0864	-0.1262	-0.061	-0.20017	-0.002	0.007							0.0142	-0.02375	0.1024	-0.0584	0.006667	-0.02017	-0.02633
44	0.0648	-0.026	0.0588	-0.002	0.003333	0.06	0.040333	-0.05	-0.0495	0.152833	0.0328	0.078167	-0.00183	0.0085	0.0012	0.0598	0.0186	0.0236	0.011333	-0.0674	0.081333	-0.004	0.006333	-0.024	0.046	0.070667			-0.0672	-0.0944	0.0768	-0.122	-0.05983	-0.1985	0.002667	-0.00217							0.0124	-0.02925	0.1034	-0.0628	0.0065	-0.02333	-0.01967
44.3333	0.0668	-0.0208	0.0554	-0.0058	0.002667	0.062667	0.0365	-0.051	-0.04667	0.148833	0.0332	0.0785	-0.00483	0.011833	0.0028	0.0648	0.0164	0.025	0.018167	-0.0628	0.068833	-0.00117	0.004167	-0.0245	0.0425	0.068667			-0.0682	-0.0962	0.076	-0.1196	-0.05617	-0.18733	0.008667	-0.02633							0.0094	-0.03375	0.1044	-0.0676	0.009833	-0.02767	-0.013
44.6667	0.0636	-0.0166	0.0546	-0.011	0.002667	0.066833	0.031	-0.0445	-0.0405	0.1465	0.0316	0.082167	-0.00883	0.0165	0.0088	0.0696	0.0202	0.0236	0.017833	-0.0514	0.066833	-0.0025	0.001833	-0.0235	0.045333	0.067			-0.0706	-0.0934	0.0856	-0.1148	-0.05317	-0.17617	0.015	-0.0395							0.0026	-0.0425	0.1126	-0.073	0.005333	-0.03417	-0.01183
45	0.0578	-0.016	0.0492	-0.0158	0.003667	0.076	0.041	-0.04367	-0.03817	0.143167	0.0336	0.090667	-0.01717	0.020833	0.0156	0.0742	0.011	0.0258	0.016167	-0.048	0.059833	-0.00267	-0.00133	-0.02217	0.043833	0.067167			-0.0716	-0.0954	0.089	-0.1064	-0.0505	-0.17517	0.020167	-0.04517							-0.0042	-0.04775	0.1198	-0.072	0.004667	-0.04067	-0.0075
45.3333	0.0558	-0.013	0.0492	-0.0172	0.006833	0.078333	0.052167	-0.0415	-0.03917	0.1375	0.0358	0.0945	-0.02	0.028167	0.0226	0.0794	0.002	0.0236	0.012	-0.0434	0.054333	-0.00517	-0.002	-0.02017	0.045167	0.0695			-0.0712	-0.0984	0.079	-0.0992	-0.04267	-0.17367	0.020667	-0.0655							-0.0092	-0.05	0.1256	-0.0722	0.0065	-0.04833	-0.00667
45.6667	0.065	-0.0066	0.0502	-0.0176	0.007	0.074167	0.051	-0.03717	-0.04083	0.132833	0.0374	0.095	-0.024	0.029333	0.0276	0.0738	0.005	0.0198	0.0115	-0.0444	0.059833	-0.00133	-0.002	-0.01933	0.045667	0.071333			-0.075	-0.1022	0.0768	-0.0986	-0.042	-0.16633	0.023667	-0.07933							-0.0122	-0.0485	0.129	-0.0766	0.0055	-0.05883	-0.008
46	0.0658	-0.0024	0.056	-0.0176	0.005	0.072333	0.057833	-0.029	-0.04483	0.130167	0.0384	0.091167	-0.01917	0.027833	0.0262	0.0666	0.0032	0.0142	0.006333	-0.0338	0.057667	-0.00367	-9.25e-18	-0.01617	0.0435	0.072833			-0.0816	-0.1134	0.0756	-0.0992	-0.04533	-0.1545	0.021833	-0.09133							-0.0128	-0.052	0.1366	-0.0798	0.006333	-0.05917	-0.0075
46.3333	0.07	-0.0008	0.0602	-0.0212	0.001833	0.074	0.066	-0.03067	-0.04417	0.1265	0.0396	0.0895	-0.01383	0.028333	0.031	0.0634	-0.0002	0.0082	0.008333	-0.0308	0.057333	-0.00617	0.005167	-0.01383	0.0425	0.070667			-0.0902	-0.1142	0.0712	-0.0974	-0.0475	-0.15567	0.018667	-0.099							-0.015	-0.0535	0.1364	-0.0864	0.0115	-0.05917	0.000333
46.6667	0.0736	0.0056	0.055	-0.025	2.78e-17	0.075167	0.070333	-0.0345	-0.05433	0.1195	0.0412	0.083667	-0.00783	0.019667	0.0388	0.0666	0.0004	0.01	0.006833	-0.02	0.062833	-0.00983	0.0075	-0.007	0.044	0.072667			-0.0978	-0.1082	0.0768	-0.086	-0.0515	-0.14583	0.012667	-0.10083							-0.02	-0.05475	0.1376	-0.084	0.010167	-0.05867	0.004333
47	0.0756	0.0068	0.0564	-0.0288	0.001667	0.071833	0.054167	-0.034	-0.051	0.112	0.0444	0.078167	-0.0055	0.023167	0.0382	0.0588	0.0074	0.0058	0.001667	-0.0238	0.068	-0.009	0.013833	-0.002	0.040333	0.079333			-0.0918	-0.0994	0.0826	-0.069	-0.05517	-0.1325	0.010333	-0.097							-0.024	-0.0595	0.1424	-0.0784	0.008	-0.052	0.004167
47.3333	0.0764	0.0026	0.0588	-0.026	-0.00183	0.064833	0.057667	-0.03717	-0.04767	0.11	0.0486	0.074667	-0.00333	0.0215	0.0354	0.0544	0.0082	-0.0024	-0.00483	-0.0246	0.07	-0.00333	0.018833	-0.00533	0.041167	0.081667			-0.0754	-0.094	0.0872	-0.0586	-0.05633	-0.1305	0.005	-0.08583							-0.029	-0.054	0.1396	-0.0706	0.005333	-0.04433	0.001833
47.6667	0.0758	-0.001	0.0602	-0.017	0.0025	0.061333	0.065667	-0.03667	-0.04833	0.105333	0.0546	0.072833	-0.00333	0.021167	0.0324	0.0552	0.0036	-0.0126	-0.0055	-0.0158	0.069167	0.004667	0.018667	-0.01117	0.033333	0.083667			-0.0572	-0.0992	0.0814	-0.0504	-0.05783	-0.13333	0.000667	-0.07567							-0.0236	-0.05175	0.1398	-0.0668	0.009167	-0.04283	0.004333
48	0.078	-0.0096	0.0492	-0.0118	-0.00533	0.058167	0.065167	-0.03233	-0.0415	0.102	0.0556	0.070167	0.001833	0.022167	0.0256	0.0594	0.0096	-0.025	-0.009	-0.0246	0.064333	0.010333	0.017833	-0.01833	0.0305	0.084667			-0.043	-0.114	0.0872	-0.0494	-0.05783	-0.1365	-0.00483	-0.065							-0.0156	-0.044	0.1376	-0.064	0.009833	-0.04	0.0005
48.3333	0.0792	-0.0234	0.0436	-0.0108	0.0015	0.054	0.068667	-0.03633	-0.04933	0.103167	0.0552	0.067667	0.007667	0.0225	0.016	0.0604	0.0092	-0.0282	-0.016	-0.016	0.069833	0.011333	0.0185	-0.02767	0.028667	0.0805			-0.0296	-0.1132	0.0956	-0.053	-0.059	-0.14117	-0.01	-0.05333							-0.0074	-0.041	0.1284	-0.0634	0.006333	-0.0345	-0.00417
48.6667	0.0788	-0.031	0.0474	-0.0112	0.001	0.045333	0.067667	-0.04183	-0.059	0.105833	0.0522	0.064167	0.011833	0.024667	0.0152	0.0586	0.009	-0.0208	-0.02183	-0.0128	0.0645	0.008833	0.008333	-0.03267	0.027667	0.078833			-0.015	-0.0978	0.0828	-0.054	-0.05917	-0.13683	-0.00917	-0.035							-0.0044	-0.04125	0.1164	-0.064	0.005833	-0.03133	-0.00117
49	0.08	-0.0356	0.0542	-0.0094	-0.003	0.0445	0.0645	-0.04233	-0.0585	0.103333	0.0502	0.065833	0.010667	0.024333	0.0194	0.0586	0.0062	-0.0106	-0.02317	-0.015	0.056833	0.004	0.012167	-0.0315	0.031	0.080833			-0.0052	-0.0774	0.0702	-0.0518	-0.06083	-0.133	-0.00717	-0.02983							0.0008	-0.04675	0.1116	-0.0652	0.011	-0.03133	0.002333
49.3333	0.0848	-0.0344	0.0512	-0.0092	-0.0045	0.044333	0.062833	-0.0405	-0.05683	0.102667	0.0492	0.065333	0.0125	0.025833	0.0236	0.0528	-0.0118	-0.0062	-0.02033	-0.02	0.059667	-0.0015	0.0115	-0.02783	0.036	0.0865			-0.0032	-0.063	0.0678	-0.0462	-0.06433	-0.12517	-0.00367	-0.02233							0.0062	-0.0415	0.1084	-0.0678	0.016833	-0.02983	0.002333
49.6667	0.0826	-0.0252	0.0568	-0.0056	-0.00117	0.036167	0.0695	-0.0345	-0.05433	0.1055	0.0486	0.057833	0.012333	0.026167	0.0302	0.0414	-0.0214	-0.008	-0.0165	-0.02	0.065167	-0.00867	0.010833	-0.0215	0.039833	0.096333			-0.0018	-0.056	0.0632	-0.0422	-0.06433	-0.125	-0.002	-0.016							0.0084	-0.033	0.105	-0.0684	0.022167	-0.02633	0.004833
50	0.075	-0.0208	0.0632	-0.0014	0.004	0.029833	0.0815	-0.03417	-0.06367	0.107667	0.0508	0.061167	0.023	0.03	0.0346	0.0306	-0.0226	-0.007	-0.0175	-0.0178	0.057333	-0.014	0.0135	-0.00967	0.038167	0.098167			-0.0016	-0.0514	0.071	-0.037	-0.05867	-0.1235	-0.00083	-0.00317							0.0106	-0.02475	0.1004	-0.0644	0.025167	-0.02283	0.014667
50.3333	0.0676	-0.019	0.0652	-0.0006	0.007333	0.030167	0.0845	-0.03167	-0.0705	0.107333	0.0516	0.067833	0.024833	0.0325	0.035	0.0368	-0.0226	-0.006	-0.01183	-0.0136	0.059	-0.0195	0.015167	-0.00167	0.044667	0.080667			-0.0022	-0.051	0.072	-0.0442	-0.05567	-0.12833	-0.00283	0.002333							0.0114	-0.02075	0.1046	-0.0712	0.033667	-0.02967	0.007833
50.6667	0.0624	-0.0122	0.0608	-0.001	0.006333	0.026667	0.082167	-0.037	-0.06983	0.106667	0.0462	0.069167	0.023333	0.033333	0.0352	0.0484	-0.028	-0.0002	-0.01	-0.0214	0.062667	-0.0235	0.0155	0.003	0.050833	0.079167			-0.0086	-0.0524	0.0734	-0.0496	-0.04817	-0.1155	0.002	-0.0095							0.0074	-0.01975	0.1054	-0.0634	0.036833	-0.02533	-0.00083
51	0.063	-0.0096	0.045	0.0014	0.010333	0.032333	0.0825	-0.03633	-0.07017	0.105667	0.035	0.075	0.025333	0.0355	0.0388	0.051	-0.031	0.003	-0.0085	-0.0172	0.0675	-0.01967	0.016667	0.004333	0.057667	0.086333			-0.0214	-0.054	0.077	-0.0588	-0.05067	-0.10833	0.0085	-0.008							0.0068	-0.01675	0.1048	-0.0548	0.035	-0.03367	-0.01167
51.3333	0.0596	-0.0206	0.04	0.0066	0.022167	0.0355	0.079833	-0.03283	-0.069	0.103333	0.0268	0.081833	0.028667	0.036167	0.047	0.0634	-0.0334	0.0084	-0.0095	-0.0202	0.0655	-0.01517	0.0165	0.008167	0.059	0.088667			-0.0366	-0.0566	0.0882	-0.0598	-0.05467	-0.0915	0.014667	-0.01033							0.007	-0.01625	0.1004	-0.0502	0.034833	-0.037	-0.02117
51.6667	0.0522	-0.0308	0.0454	0.0116	0.016167	0.035833	0.074167	-0.0375	-0.06817	0.099	0.0206	0.082333	0.029833	0.036333	0.0522	0.0708	-0.0328	0.0152	-0.0065	-0.0292	0.0645	-0.01217	0.016667	0.007667	0.057333	0.077333			-0.05	-0.0636	0.092	-0.0546	-0.05717	-0.076	0.019	-0.00833							0.009	-0.01475	0.099	-0.0478	0.037	-0.0415	-0.017
52	0.042	-0.0348	0.0534	0.0166	0.015167	0.0365	0.068833	-0.03883	-0.0635	0.097	0.0168	0.0805	0.028167	0.037667	0.0546	0.0808	-0.0292	0.0186	-0.00667	-0.0318	0.065167	-0.00983	0.015667	0.007167	0.055333	0.07			-0.0678	-0.0604	0.0852	-0.0512	-0.04317	-0.07367	0.020667	-0.00533							0.0102	-0.01325	0.0986	-0.0514	0.0415	-0.04517	-0.01267
52.3333	0.036	-0.0422	0.0534	0.0158	0.021167	0.0415	0.062833	-0.03617	-0.06	0.097833	0.0176	0.081833	0.026333	0.038167	0.0482	0.0774	-0.031	0.0148	-0.01217	-0.0344	0.064	-0.01517	0.012833	0.005	0.057167	0.081			-0.0772	-0.06	0.0818	-0.0534	-0.0405	-0.07217	0.022	0.004333							0.0166	-0.01	0.091	-0.0524	0.042833	-0.04767	-0.0135
52.6667	0.0294	-0.045	0.0598	0.0148	0.017167	0.044667	0.059833	-0.0345	-0.05517	0.097333	0.0242	0.079	0.025333	0.0365	0.0396	0.0712	-0.0372	0.0028	-0.01683	-0.038	0.054833	-0.01133	0.007833	0.006	0.058333	0.080167			-0.0792	-0.0628	0.0758	-0.0516	-0.0355	-0.0675	0.0195	0.009667							0.0182	-0.00625	0.0848	-0.0538	0.042333	-0.04917	-0.015
53	0.0242	-0.0444	0.0474	0.0132	0.0165	0.0425	0.065	-0.03283	-0.057	0.094167	0.0286	0.081833	0.026833	0.034833	0.041	0.0726	-0.0404	-0.0116	-0.019	-0.0364	0.055	-0.006	0.0015	0.003333	0.063333	0.075667			-0.0858	-0.0566	0.0736	-0.05	-0.036	-0.0625	0.019833	0.02							0.017	-0.00075	0.077	-0.0554	0.036333	-0.0505	-0.013
53.3333	0.02	-0.0378	0.0416	0.0138	0.016833	0.041333	0.068333	-0.0345	-0.05583	0.090667	0.0336	0.091667	0.028667	0.032	0.041	0.0738	-0.044	-0.0164	-0.012	-0.0342	0.058167	-0.01083	-0.00633	0.006667	0.065833	0.073333			-0.0928	-0.0574	0.071	-0.0562	-0.04033	-0.05167	0.0165	0.034167							0.0136	0.006	0.0728	-0.0554	0.033	-0.05317	-0.01567
53.6667	0.0116	-0.0358	0.0568	0.0114	0.016	0.040333	0.07	-0.029	-0.05583	0.090167	0.0344	0.096167	0.031833	0.029	0.0402	0.0816	-0.0362	-0.0236	-0.00683	-0.023	0.061333	-0.01167	0.005833	0.007167	0.0615	0.0525			-0.0958	-0.0646	0.0722	-0.0588	-0.04667	-0.05367	0.007333	0.036167							0.013	0.01175	0.0716	-0.055	0.036333	-0.04917	-0.01483
54	-0.0006	-0.036	0.061	0.0096	0.011333	0.038167	0.0715	-0.02833	-0.064	0.0885	0.0314	0.093	0.037667	0.026333	0.0384	0.0876	-0.0316	-0.0298	-0.00833	-0.0234	0.066	-0.014	0.009167	0.0055	0.057833	0.080333			-0.0974	-0.0662	0.073	-0.055	-0.05083	-0.046	-2.78e-17	0.0325							0.0118	0.0145	0.0738	-0.0574	0.0405	-0.043	-0.02683
54.3333	-0.0088	-0.0288	0.076	0.0102	0.013	0.036	0.0695	-0.0265	-0.065	0.0855	0.0298	0.091167	0.039167	0.021333	0.0324	0.0836	-0.0254	-0.0278	-0.0095	-0.024	0.063833	-0.012	0.009833	0.003167	0.056833	0.083167			-0.101	-0.067	0.0726	-0.0526	-0.05333	-0.04317	-0.0005	0.0215							0.009	0.013	0.0696	-0.064	0.039833	-0.03567	-0.039
54.6667	-0.0104	-0.0248	0.0834	0.012	0.018667	0.035667	0.0695	-0.02283	-0.07567	0.080167	0.0294	0.087667	0.038833	0.022	0.0328	0.0778	-0.0146	-0.0236	-0.00717	-0.02	0.062167	-0.00717	0.013	0.002	0.052167	0.082			-0.1056	-0.0702	0.0674	-0.0468	-0.05733	-0.04267	0.005	0.010167							0.0026	0.01025	0.0632	-0.072	0.038833	-0.03117	-0.0435
55	-0.0142	-0.0256	0.0886	0.014	0.020167	0.035167	0.0685	-0.027	-0.08383	0.0775	0.0356	0.084167	0.039667	0.021	0.0322	0.0808	-0.01	-0.0262	-0.00017	-0.0064	0.060167	-0.00567	0.015833	0.000333	0.053333	0.085333			-0.1142	-0.076	0.0712	-0.0406	-0.049	-0.04967	0.003667	0.004							-0.006	0.0125	0.0624	-0.0712	0.0345	-0.03417	-0.04883
55.3333	-0.0204	-0.0194	0.0988	0.0162	0.020333	0.032167	0.067167	-0.02433	-0.08283	0.072667	0.0396	0.075833	0.0415	0.019667	0.0288	0.0942	-0.0092	-0.0248	1.85e-17	0.0016	0.053833	-0.01067	0.010833	-0.004	0.052667	0.0895			-0.1176	-0.0794	0.0724	-0.0338	-0.04783	-0.05483	-0.00067	0.002667							-0.0098	0.01625	0.0596	-0.0706	0.0345	-0.03	-0.05183
55.6667	-0.025	-0.0046	0.1004	0.022	0.020167	0.03	0.067833	-0.02817	-0.08717	0.069167	0.0362	0.074333	0.048	0.019667	0.0254	0.0998	-0.006	-0.0194	-0.00383	0.0034	0.047333	-0.015	0.007167	-0.003	0.052167	0.0945			-0.1158	-0.0906	0.0738	-0.0244	-0.04967	-0.06717	-0.00317	-0.00083							-0.0094	0.01675	0.064	-0.0768	0.0375	-0.02317	-0.05067
56	-0.0304	0.0044	0.0874	0.0262	0.016	0.030167	0.066833	-0.0315	-0.0905	0.067167	0.034	0.0725	0.051667	0.019667	0.0202	0.1034	-0.0058	-0.0158	-0.00867	-0.0062	0.048	-0.01917	0.006333	-0.00267	0.043333	0.096667			-0.1044	-0.093	0.065	-0.0206	-0.04867	-0.07717	-0.00333	-0.0105							-0.0108	0.015	0.0682	-0.0782	0.040167	-0.01733	-0.05633
56.3333	-0.0346	0.0092	0.0816	0.03	0.015333	0.028333	0.0605	-0.03333	-0.08933	0.066	0.0334	0.071	0.051333	0.018	0.014	0.101	-0.0012	-0.0152	-0.00983	-0.0078	0.055	-0.02033	0.007333	-0.004	0.035333	0.097667			-0.098	-0.0906	0.057	-0.0212	-0.049	-0.08983	-0.00117	-0.01117							-0.0162	0.01825	0.0668	-0.0828	0.044167	-0.00633	-0.05583
56.6667	-0.043	0.0088	0.0894	0.0304	-0.00517	0.025833	0.0625	-0.0375	-0.1005	0.061	0.0308	0.064	0.0535	0.016	0.0054	0.0876	0.0048	-0.0132	-0.012	-0.0154	0.050167	-0.01683	0.009333	-0.002	0.028333	0.099			-0.0988	-0.0916	0.0554	-0.024	-0.05133	-0.0955	-0.00217	-0.00617							-0.0234	0.01775	0.0642	-0.0858	0.045667	-0.00083	-0.05783
57	-0.0512	0.0012	0.0906	0.0308	-0.00283	0.028833	0.063833	-0.035	-0.10333	0.061167	0.0284	0.0645	0.052833	0.014833	0.0044	0.0846	0.0104	-0.0136	-0.02083	-0.0102	0.0405	-0.01783	0.0085	0.001167	0.033	0.095			-0.0974	-0.0894	0.0546	-0.0314	-0.05783	-0.1065	-0.00183	-0.007							-0.0286	0.025	0.063	-0.0896	0.046167	0.001833	-0.06117
57.3333	-0.0512	-0.0004	0.0964	0.0284	-0.00283	0.0325	0.069333	-0.0235	-0.10617	0.064333	0.0282	0.063667	0.048833	0.015	0.0124	0.0916	0.012	-0.0086	-0.03283	0.0054	0.043	-0.0225	0.0075	0.0005	0.0395	0.093667			-0.0938	-0.092	0.0596	-0.0344	-0.06317	-0.11767	-0.00217	-0.007							-0.0322	0.028	0.0626	-0.0822	0.048167	0.010833	-0.064
57.6667	-0.048	0.0024	0.1032	0.0218	0.005	0.036833	0.069333	-0.02383	-0.10783	0.068333	0.0294	0.060833	0.0435	0.016	0.013	0.0928	0.0052	0.0014	-0.04167	0.0102	0.044667	-0.0255	0.009167	-0.0005	0.046	0.090667			-0.086	-0.0922	0.0614	-0.0336	-0.06383	-0.125	0.002167	-0.01733							-0.0366	0.02775	0.0586	-0.0908	0.0495	0.021333	-0.061
58	-0.044	0.0042	0.1052	0.0202	0.010333	0.043167	0.064167	-0.02833	-0.11067	0.069667	0.0328	0.059833	0.043333	0.015667	0.009	0.0976	-0.004	0.014	-0.04333	0.0098	0.044	-0.02483	0.016833	0.004667	0.050833	0.089167			-0.0752	-0.0916	0.0622	-0.035	-0.0555	-0.12583	0.012667	-0.02283							-0.0386	0.02025	0.057	-0.0908	0.052667	0.028	-0.05867
58.3333	-0.0408	0.0062	0.0942	0.0274	0.0145	0.0505	0.061333	-0.03533	-0.11267	0.07	0.0322	0.052333	0.040167	0.014333	0.0078	0.1062	-0.0016	0.018	-0.04383	0.008	0.042	-0.0305	0.019	0.007333	0.055833	0.090167			-0.0656	-0.0944	0.067	-0.0384	-0.05217	-0.1395	0.022667	-0.01483							-0.0392	0.01475	0.0634	-0.0926	0.053167	0.018	-0.05967
58.6667	-0.0354	0.0022	0.0868	0.0342	0.007167	0.050833	0.062167	-0.036	-0.11367	0.069167	0.0314	0.048833	0.035667	0.015667	0.0098	0.1068	0.0042	0.0234	-0.04233	0.0048	0.0365	-0.03517	0.025333	0.010833	0.0645	0.0915			-0.056	-0.1028	0.0708	-0.0358	-0.052	-0.13417	0.026	0.002167							-0.0396	0.011	0.0586	-0.095	0.0545	0.0145	-0.05467
59	-0.032	0.0028	0.0922	0.037	0.0035	0.052833	0.052333	-0.0365	-0.1115	0.069667	0.0326	0.045833	0.028667	0.016833	0.0138	0.1192	0.0052	0.0248	-0.03917	-0.0036	0.041167	-0.0315	0.0285	0.018	0.070833	0.092167			-0.0498	-0.1048	0.0704	-0.0298	-0.0505	-0.13683	0.0285	0.012667							-0.0428	0.00825	0.0532	-0.1044	0.055833	0.010833	-0.0545
59.3333	-0.0258	-0.0066	0.1036	0.0396	0.0075	0.052667	0.0485	-0.0355	-0.113	0.065167	0.0318	0.0455	0.026167	0.017833	0.0214	0.114	0.003	0.0204	-0.04567	0.0078	0.047167	-0.023	0.031667	0.020167	0.0715	0.0895			-0.0428	-0.101	0.0574	-0.0218	-0.04683	-0.1455	0.037	0.019667							-0.0426	0.0045	0.046	-0.1102	0.0585	0.010667	-0.053
[truncated: 95 more columns]
