# Supplementary material for: Neural circuit mechanisms for transforming learned olfactory valences into wind-oriented movement
Source: eLife. 2023 Sep 18;12:e85756. doi: 10.7554/eLife.85756 (PMC10588983; doi:10.7554/eLife.85756)
Supplement: Figure 7—source data 3. [file elife-85756-fig7-data3.xlsx]

## Sheet: Sheet1
Temperature	32C				25C
genotype	w/w;SS33917(VT007746-p65ADZp in attP40; R64A11-ZpGAL4DBD in attP2)/+	w/w;SS33917(VT007746-p65ADZp in attP40; R64A11-ZpGAL4DBD in attP2)/20xUAS-Shbire-p10 in VK00005	w/w;;R64A11-ZpGAL4DBD in attP2/20xUAS-Shbire-p10 in VK00005	w/w;+;VT007746-p65ADZp in attP40/+;+/20xUAS-Shbire-p10 in VK00005	w/w;SS33917(VT007746-p65ADZp in attP40; R64A11-ZpGAL4DBD in attP2)/+	w/w;SS33917(VT007746-p65ADZp in attP40; R64A11-ZpGAL4DBD in attP2)/20xUAS-Shbire-p10 in VK00005	w/w;;R64A11-ZpGAL4DBD in attP2/20xUAS-Shbire-p10 in VK00005	w/w;+;VT007746-p65ADZp in attP40/+;+/20xUAS-Shbire-p10 in VK00005
#01	0.526649	0.057137	0.426875	0.474512	0.02361	0.060933	0.340851	0.491802
#02	0.260556	0.071881	0.193208	0.338769	0.207983	0.206318	0.123222	0.41289
#03	0.396178	0.232145	0.195597	0.387767	0.362951	0.081757	0.2524	0.308713
#04	0.314074	0.097998	0.403618	0.436443	0.517414	0.343484	0.210522	0.327721
#05	0.357636	0.159361	0.387679	0.53839	0.333333	0.461538	0.428571	0.290323
#06	0.348964	0.121577	0.227317	0.34652	0.290323	0.304348	0.684211	0.454545
#07	0.236902	0.232789	0.318344	0.432826	0.249643	0.183134	0.063347	0.391395
#08	0.246435	0.059527	0.49354	0.503128	0.376496	0.073561	0.150448	0.197798
#09	0.201974				0.482044	0.3642	0.37441	0.208059
#10	0.461178				0.5297	0.255778	0.421199	0.431856
#11	0.286658
#12	0.302222
