# Supplementary material for: Neural circuit mechanisms for transforming learned olfactory valences into wind-oriented movement
Source: eLife. 2023 Sep 18;12:e85756. doi: 10.7554/eLife.85756 (PMC10588983; doi:10.7554/eLife.85756)
Supplement: Figure 7—source data 4. [file elife-85756-fig7-data4.xlsx]

## Sheet: Sheet1
	w;w,20xUAS-CsChrimson-mVenus; +/Empty-split-GA4		w;w,20xUAS-CsChrimson-mVenus; +/SS33917
Time (s)	Mean	SEM	Mean	SEM
0.333333	-0.01064	0.044707	-0.00566	0.057605
0.666667	-0.00831	0.04337	0.004875	0.069497
1	0.004098	0.040788	-0.02858	0.080743
1.33333	-0.01386	0.040965	-0.05169	0.091632
1.66667	-0.00894	0.041337	-0.00961	0.090882
2	0.00082	0.043685	-0.01133	0.065142
2.33333	0.008855	0.042493	-0.00061	0.069648
2.66667	0.012925	0.036564	0.002488	0.069903
3	0.015658	0.035815	-0.01105	0.080161
3.33333	0.005298	0.037436	0.001394	0.074279
3.66667	0.010805	0.033979	-0.02073	0.063142
4	0.003613	0.033902	-0.00901	0.064699
4.33333	0.009003	0.025375	-0.03091	0.062178
4.66667	0.017393	0.030128	-0.0368	0.065967
5	0.006917	0.033636	-0.01709	0.073581
5.33333	-0.00622	0.04074	-0.02085	0.061748
5.66667	-0.01948	0.044042	-0.04488	0.06738
6	-0.03248	0.042947	-0.03276	0.07631
6.33333	-0.00936	0.041906	-0.04418	0.089373
6.66667	0.003878	0.040317	-0.06473	0.088851
7	-0.00913	0.038215	-0.05067	0.074278
7.33333	-0.02748	0.040008	-0.04323	0.081603
7.66667	-0.02039	0.039802	-0.06431	0.080728
8	-0.03645	0.038889	-0.05886	0.088786
8.33333	-0.03121	0.039201	-0.05933	0.082577
8.66667	-0.02327	0.040096	-0.04759	0.075124
9	-0.02247	0.040776	-0.05099	0.074626
9.33333	-0.00404	0.035547	-0.04449	0.074717
9.66667	0.008627	0.034454	-0.02923	0.081309
10	0.008925	0.0356	-0.02176	0.075118
10.3333	0.007275	0.039307	-0.02538	0.071774
10.6667	0.034693	0.035415	0.001281	0.071804
11	0.03841	0.034594	-0.04866	0.082219
11.3333	0.03034	0.037639	-0.00731	0.067516
11.6667	0.02667	0.035461	-0.01799	0.079962
12	0.03666	0.03181	-0.03843	0.086612
12.3333	0.02654	0.033492	-0.05114	0.076977
12.6667	0.017683	0.039873	-0.05654	0.082518
13	0.01087	0.041198	-0.04837	0.087869
13.3333	0.017058	0.042543	-0.01446	0.082333
13.6667	0.010313	0.040704	0.012675	0.080435
14	0.00936	0.041614	0.039019	0.07915
14.3333	0.001325	0.038855	0.057731	0.070907
14.6667	-0.01284	0.036574	0.042975	0.05449
15	-0.0114	0.042251	0.053525	0.038596
15.3333	-0.03256	0.043685	0.016369	0.055114
15.6667	-0.02821	0.044278	0.034469	0.068735
16	-0.02771	0.041527	-0.01179	0.065085
16.3333	-0.02049	0.039224	-0.01649	0.078357
16.6667	-0.0226	0.041558	0.013081	0.085104
17	-0.01147	0.04347	0.009856	0.072214
17.3333	0.01421	0.045364	-0.00866	0.080782
17.6667	0.005745	0.044535	-0.00682	0.074762
18	-0.0062	0.043609	-0.05248	0.075032
18.3333	0.008015	0.050703	-0.03699	0.069759
18.6667	-0.01753	0.047439	-0.05013	0.064246
19	0.00932	0.051069	-0.01315	0.071163
19.3333	0.002602	0.054855	-0.01249	0.068762
19.6667	-0.01088	0.053497	0.006856	0.064256
20	0.00248	0.051605	-0.00129	0.064597
20.3333	-0.00595	0.052829	0.000169	0.056174
20.6667	-0.00193	0.050324	0.011969	0.058511
21	0.01204	0.050208	0.021844	0.064575
21.3333	0.006328	0.052729	0.034869	0.057465
21.6667	0.034798	0.056404	0.0292	0.061216
22	0.022913	0.054863	0.0322	0.079415
22.3333	0.01655	0.054245	0.020975	0.075102
22.6667	0.00081	0.053394	0.044206	0.080808
23	-0.01738	0.052493	0.032731	0.083472
23.3333	-0.02591	0.052321	0.028975	0.084617
23.6667	-0.023	0.052442	-0.00115	0.082185
24	-0.02628	0.04519	0.005925	0.070859
24.3333	-0.03689	0.044631	0.013469	0.068951
24.6667	-0.05023	0.043279	0.006494	0.072568
25	-0.04739	0.043295	0.026144	0.069583
25.3333	-0.04221	0.044619	0.0217	0.077338
25.6667	-0.03322	0.047398	0.08325	0.081682
26	-0.04948	0.046554	0.075713	0.082756
26.3333	-0.04925	0.047434	0.049906	0.080844
26.6667	-0.04636	0.042313	0.072644	0.09105
27	-0.04636	0.039887	0.048975	0.105556
27.3333	-0.07708	0.034034	0.040338	0.112479
27.6667	-0.07334	0.036268	0.059356	0.101566
28	-0.06765	0.037328	0.048425	0.102349
28.3333	-0.04394	0.033836	0.047725	0.116611
28.6667	-0.02849	0.032042	0.048906	0.112075
29	-0.03647	0.030589	0.075944	0.103862
29.3333	-0.04162	0.030558	0.058019	0.104504
29.6667	-0.05145	0.032533	0.04	0.105523
30	-0.05262	0.032155	0.033338	0.103478
30.3333	-0.04249	0.032044	0.023881	0.113253
30.6667	-0.02753	0.029068	0.005825	0.121827
31	-0.04211	0.033364	0.005444	0.118799
31.3333	-0.03561	0.030268	0.019463	0.109469
31.6667	-0.04204	0.029975	0.028019	0.114727
32	-0.03566	0.031745	0.031613	0.112742
32.3333	-0.02628	0.033984	0.055456	0.110635
32.6667	0.003518	0.037616	0.038619	0.10948
33	0.011238	0.040336	0.027644	0.113918
33.3333	0.0095	0.037093	0.0142	0.11242
33.6667	0.003523	0.036004	0.022519	0.117444
34	0.013603	0.038204	0.014581	0.113838
34.3333	0.026505	0.036939	0.032331	0.118412
34.6667	0.032088	0.036934	0.047013	0.122081
35	0.03968	0.038347	0.026781	0.117798
35.3333	0.058343	0.039132	0.0193	0.118339
35.6667	0.062568	0.042537	0.043619	0.112517
36	0.064285	0.04118	0.060756	0.11128
36.3333	0.060708	0.039058	0.060875	0.114963
36.6667	0.052263	0.037087	0.083713	0.11791
37	0.055113	0.039111	0.107406	0.114238
37.3333	0.06225	0.041757	0.133063	0.118608
37.6667	0.073803	0.043307	0.129475	0.103695
38	0.080338	0.042712	0.146994	0.108435
38.3333	0.089563	0.042472	0.162125	0.111854
38.6667	0.071258	0.043522	0.176	0.117719
39	0.09135	0.041224	0.163331	0.118959
39.3333	0.095983	0.040453	0.208631	0.110161
39.6667	0.097545	0.038207	0.187663	0.107493
40	0.093805	0.036931	0.166469	0.100154
40.3333	0.098335	0.036826	0.166275	0.102766
40.6667	0.10324	0.039306	0.154406	0.091404
41	0.090923	0.039214	0.158931	0.090678
41.3333	0.0806	0.037376	0.163938	0.08838
41.6667	0.090213	0.038584	0.198719	0.076436
42	0.080653	0.039321	0.159663	0.079453
42.3333	0.075863	0.037009	0.1446	0.065471
42.6667	0.070673	0.039673	0.177525	0.07756
43	0.08537	0.045839	0.18515	0.07936
43.3333	0.070323	0.042834	0.200013	0.07466
43.6667	0.084033	0.04439	0.197381	0.073726
44	0.087855	0.040701	0.204281	0.06227
44.3333	0.097118	0.041962	0.199581	0.066572
44.6667	0.08235	0.044596	0.195088	0.069444
45	0.0784	0.04039	0.191669	0.061103
45.3333	0.06987	0.042869	0.200481	0.055712
45.6667	0.086078	0.040565	0.184519	0.065888
46	0.088433	0.039483	0.184538	0.069462
46.3333	0.08685	0.038033	0.217506	0.068517
46.6667	0.098433	0.036914	0.225569	0.071596
47	0.09771	0.035675	0.246688	0.065053
47.3333	0.114385	0.03999	0.264006	0.061809
47.6667	0.109763	0.041461	0.245013	0.067802
48	0.109565	0.037803	0.243706	0.066585
48.3333	0.114635	0.039233	0.268519	0.057929
48.6667	0.12002	0.038398	0.238275	0.053083
49	0.110705	0.041596	0.227194	0.072228
49.3333	0.126033	0.045003	0.271238	0.080299
49.6667	0.127693	0.044405	0.237713	0.081284
50	0.113408	0.043417	0.275388	0.077197
50.3333	0.117785	0.041619	0.306356	0.086201
50.6667	0.12355	0.044876	0.326113	0.075639
51	0.119368	0.044391	0.349931	0.070634
51.3333	0.120008	0.044298	0.359388	0.075863
51.6667	0.124335	0.046631	0.343131	0.072439
52	0.13288	0.046025	0.345675	0.065166
52.3333	0.122013	0.041926	0.369794	0.062861
52.6667	0.123028	0.038654	0.361956	0.064849
53	0.108828	0.035343	0.366856	0.056295
53.3333	0.09942	0.036718	0.328038	0.05803
53.6667	0.114208	0.040547	0.322119	0.061875
54	0.111208	0.035914	0.330556	0.072964
54.3333	0.084863	0.035002	0.338063	0.070699
54.6667	0.09007	0.034711	0.352606	0.067045
55	0.088885	0.03272	0.372713	0.058722
55.3333	0.085965	0.031775	0.383625	0.055768
55.6667	0.080338	0.037701	0.3626	0.06244
56	0.105048	0.03999	0.361125	0.066936
56.3333	0.098655	0.040087	0.38035	0.059377
56.6667	0.072105	0.033463	0.374531	0.055813
57	0.08434	0.034624	0.355631	0.052134
57.3333	0.101008	0.036765	0.414825	0.055197
57.6667	0.10071	0.037798	0.409644	0.063241
58	0.110465	0.033824	0.398219	0.054955
58.3333	0.099543	0.037554	0.389588	0.052318
58.6667	0.093428	0.038244	0.399425	0.039595
59	0.099898	0.036427	0.43025	0.044189
59.3333	0.105565	0.038547	0.415063	0.042561
59.6667	0.121923	0.038042	0.414525	0.040207
60	0.131983	0.037852	0.421069	0.056059
60.3333	0.128758	0.041379	0.401275	0.060819
60.6667	0.112558	0.045797	0.382106	0.061185
61	0.098095	0.045235	0.382313	0.063877
61.3333	0.086385	0.047583	0.394	0.060191
61.6667	0.070213	0.048252	0.400038	0.063609
62	0.055498	0.042991	0.389194	0.062696
62.3333	0.056838	0.03906	0.380763	0.059661
62.6667	0.061868	0.037255	0.39195	0.061953
63	0.063185	0.034197	0.395275	0.044608
63.3333	0.053985	0.031018	0.406969	0.047506
63.6667	0.026278	0.027278	0.4183	0.054876
64	0.026265	0.028696	0.365869	0.045107
64.3333	0.02393	0.03089	0.354569	0.043617
64.6667	0.017833	0.031408	0.354125	0.036914
65	0.021785	0.032041	0.343206	0.037889
65.3333	0.019838	0.029424	0.336019	0.040293
65.6667	0.017918	0.032619	0.318069	0.039842
66	0.031773	0.033116	0.279831	0.03299
66.3333	0.041695	0.037072	0.2963	0.04785
66.6667	0.028773	0.035566	0.330263	0.05511
67	0.018508	0.037905	0.303475	0.072397
67.3333	0.001187	0.04132	0.312494	0.056232
67.6667	-0.01423	0.04049	0.278844	0.056415
68	-0.01851	0.03968	0.30575	0.068828
68.3333	-0.02231	0.038789	0.3071	0.062561
68.6667	-0.03186	0.037807	0.295606	0.060227
69	-0.03083	0.039403	0.300806	0.062991
69.3333	-0.034	0.040744	0.302156	0.061684
69.6667	-0.03255	0.040754	0.302531	0.068061
70	-0.02283	0.047388	0.296256	0.061501
70.3333	-0.01888	0.047698	0.288431	0.056501
70.6667	-0.00575	0.049463	0.276225	0.060091
71	-0.02606	0.04445	0.272794	0.060937
71.3333	-0.02699	0.046389	0.26525	0.05932
71.6667	-0.03305	0.047102	0.228706	0.052933
72	-0.04533	0.046748	0.241594	0.049711
72.3333	-0.05597	0.044382	0.210944	0.043039
72.6667	-0.03925	0.043027	0.208888	0.032903
73	-0.03232	0.039564	0.214813	0.031623
73.3333	-0.05689	0.041605	0.208488	0.044496
73.6667	-0.06112	0.04265	0.161175	0.046352
74	-0.04484	0.041282	0.158575	0.044837
74.3333	-0.04224	0.03799	0.155544	0.047656
74.6667	-0.02436	0.034303	0.151313	0.047171
75	-0.02045	0.036165	0.159956	0.039367
75.3333	-0.0279	0.036262	0.146113	0.047228
75.6667	-0.03533	0.032304	0.142631	0.047882
76	-0.038	0.031453	0.133225	0.043968
76.3333	-0.02773	0.03151	0.130475	0.061492
76.6667	-0.01015	0.03078	0.129988	0.05009
77	0.010445	0.029968	0.141325	0.057863
77.3333	0.015203	0.028879	0.145275	0.062543
77.6667	0.015198	0.028627	0.17245	0.063832
78	0.034965	0.031424	0.175569	0.062234
78.3333	0.005783	0.030315	0.192031	0.077373
78.6667	0.010333	0.031351	0.169813	0.069195
79	0.009033	0.033461	0.169075	0.082146
79.3333	0.00654	0.037606	0.165131	0.086818
79.6667	0.01612	0.039346	0.168675	0.084712
80	-0.00566	0.042064	0.140613	0.084057
80.3333	0.008195	0.040367	0.154475	0.085598
80.6667	0.000443	0.043419	0.159456	0.080523
81	-0.00375	0.04294	0.180056	0.073358
81.3333	-0.00621	0.041124	0.166425	0.070738
81.6667	-0.00245	0.040173	0.196613	0.067221
82	-0.02082	0.040025	0.205044	0.063933
82.3333	-0.02678	0.041342	0.192688	0.064044
82.6667	-0.01796	0.040722	0.204731	0.076107
83	-0.03026	0.041153	0.18995	0.087069
83.3333	-0.04062	0.041251	0.198131	0.086317
83.6667	-0.04714	0.041617	0.179906	0.082078
84	-0.04722	0.039698	0.177294	0.085269
84.3333	-0.03977	0.040579	0.20075	0.089381
84.6667	-0.03654	0.041845	0.179875	0.085673
85	-0.03318	0.040115	0.15655	0.080836
85.3333	-0.03208	0.042828	0.125669	0.084092
85.6667	-0.03894	0.042425	0.137063	0.074694
86	-0.043	0.042922	0.138644	0.070054
86.3333	-0.03296	0.044626	0.091963	0.070821
86.6667	-0.0303	0.042368	0.095294	0.073312
87	-0.03597	0.038841	0.107975	0.072938
87.3333	-0.02591	0.039556	0.085538	0.091161
87.6667	-0.03237	0.040782	0.041119	0.093881
88	-0.02049	0.041758	0.033894	0.093202
88.3333	-0.01359	0.045906	0.0337	0.099007
88.6667	-0.01568	0.046271	0.032313	0.09262
89	-0.01141	0.04674	0.016475	0.093635
89.3333	-0.00592	0.047445	0.00405	0.100796
89.6667	-0.01608	0.047631	0.008038	0.098423
90	-0.01882	0.045149	0.038713	0.089592
90.3333	-0.04017	0.044231	0.029219	0.079407
90.6667	-0.033	0.042718	0.031619	0.086534
91	-0.03004	0.04515	0.031138	0.082674
91.3333	-0.03051	0.045261	0.014906	0.079587
91.6667	-0.02925	0.046299	-0.02511	0.086822
92	-0.0343	0.046776	-0.01383	0.088635
92.3333	-0.0416	0.045241	-0.01073	0.086421
92.6667	-0.04427	0.045284	0.005181	0.08865
93	-0.03964	0.046573	-0.00139	0.091094
93.3333	-0.03736	0.042699	-0.01838	0.08944
93.6667	-0.05245	0.042018	-0.05449	0.095193
94	-0.0595	0.045772	-0.06387	0.088648
94.3333	-0.06452	0.045374	-0.0791	0.087338
94.6667	-0.08865	0.043931	-0.09233	0.09986
95	-0.09164	0.045494	-0.10014	0.102515
95.3333	-0.0823	0.045962	-0.12784	0.096133
95.6667	-0.07705	0.043659	-0.10836	0.09319
96	-0.07903	0.040667	-0.11788	0.090559
96.3333	-0.09633	0.038493	-0.11518	0.094425
96.6667	-0.10221	0.039889	-0.13702	0.096369
97	-0.12339	0.037198	-0.15944	0.088651
97.3333	-0.14345	0.03801	-0.16307	0.085883
97.6667	-0.16531	0.038479	-0.18652	0.07572
98	-0.18039	0.039789	-0.19389	0.064699
98.3333	-0.18066	0.040508	-0.19192	0.067331
98.6667	-0.16234	0.043357	-0.17943	0.084092
99	-0.15389	0.047687	-0.19294	0.070954
99.3333	-0.15924	0.047921	-0.19018	0.064751
99.6667	-0.16746	0.046186	-0.24385	0.066183
100	-0.17164	0.041355	-0.24304	0.067806
100.333	-0.15567	0.038286	-0.22289	0.066562
100.667	-0.14991	0.040927	-0.22594	0.064348
101	-0.14258	0.043021	-0.23264	0.061536
101.333	-0.14484	0.043151	-0.25046	0.053577
101.667	-0.15441	0.042519	-0.27368	0.059649
102	-0.15146	0.043779	-0.29955	0.066936
102.333	-0.15444	0.043906	-0.30853	0.055012
102.667	-0.13983	0.042976	-0.31098	0.058057
103	-0.13582	0.041969	-0.33843	0.061483
103.333	-0.13535	0.041695	-0.33879	0.055596
103.667	-0.12798	0.042233	-0.34069	0.062931
104	-0.13459	0.038504	-0.34986	0.058224
104.333	-0.14242	0.04166	-0.33066	0.051652
104.667	-0.13538	0.043078	-0.32433	0.053024
105	-0.13879	0.043856	-0.35212	0.058592
105.333	-0.14984	0.047278	-0.32914	0.057373
105.667	-0.15326	0.04524	-0.33718	0.05858
106	-0.14255	0.04456	-0.36241	0.057409
106.333	-0.16039	0.0446	-0.36631	0.062505
106.667	-0.1645	0.045151	-0.35373	0.060418
107	-0.16148	0.04305	-0.36064	0.062785
107.333	-0.15128	0.044504	-0.36068	0.063092
107.667	-0.13574	0.045751	-0.38399	0.062935
108	-0.14086	0.04642	-0.39142	0.060178
108.333	-0.14567	0.043586	-0.41545	0.067011
108.667	-0.13844	0.044282	-0.45141	0.073148
109	-0.1305	0.041587	-0.46393	0.073756
109.333	-0.14975	0.035926	-0.44938	0.068884
109.667	-0.14646	0.034955	-0.45145	0.058352
110	-0.14431	0.030942	-0.45493	0.06299
110.333	-0.15154	0.030493	-0.45073	0.065253
110.667	-0.16636	0.032813	-0.46104	0.080996
111	-0.15191	0.0351	-0.46013	0.07627
111.333	-0.15061	0.036882	-0.45763	0.075425
111.667	-0.15405	0.038551	-0.4403	0.076348
112	-0.15219	0.039232	-0.43119	0.081603
112.333	-0.15604	0.039866	-0.43813	0.080597
112.667	-0.16122	0.039613	-0.44578	0.082497
113	-0.16762	0.04063	-0.45433	0.083772
113.333	-0.17123	0.039329	-0.46149	0.08346
113.667	-0.16179	0.039698	-0.48752	0.081206
114	-0.16547	0.038726	-0.48401	0.076144
114.333	-0.17378	0.039056	-0.49314	0.080608
114.667	-0.18966	0.038986	-0.47813	0.082988
115	-0.20085	0.041758	-0.49359	0.07731
115.333	-0.19869	0.04162	-0.50452	0.081873
115.667	-0.19322	0.04104	-0.49596	0.08302
116	-0.17836	0.041736	-0.47245	0.096532
116.333	-0.17334	0.038879	-0.47617	0.083981
116.667	-0.17258	0.040437	-0.49892	0.08468
117	-0.16166	0.040097	-0.49767	0.08547
117.333	-0.15561	0.036825	-0.51113	0.083486
117.667	-0.14831	0.03601	-0.50948	0.08096
118	-0.14236	0.034341	-0.52056	0.08053
118.333	-0.1508	0.034427	-0.51022	0.078885
118.667	-0.14661	0.035719	-0.49708	0.088796
119	-0.15093	0.035347	-0.51134	0.092902
119.333	-0.15182	0.036029	-0.51999	0.09725
119.667	-0.15541	0.036662	-0.5276	0.091707
