# Supplementary material for: Neural circuit mechanisms for transforming learned olfactory valences into wind-oriented movement
Source: eLife. 2023 Sep 18;12:e85756. doi: 10.7554/eLife.85756 (PMC10588983; doi:10.7554/eLife.85756)
Supplement: Figure 7—source data 5. [file elife-85756-fig7-data5.xlsx]

## Sheet: Sheet1
	w;w,20xUAS-CsChrimson-mVenus; +/Empty-split-GA4	w;w,20xUAS-CsChrimson-mVenus; +/SS33917	w;w,20xUAS-CsChrimson-mVenus; +/SS33918	w;w,20xUAS-CsChrimson-mVenus; +/SS49975
#01	0.057454	0.178125	0.237155	0.33958
#02	0.0661228	0.0936386	0.140631	0.292666
#03	0.0957614	0.153259	0.0826992	0.394577
#04	0.0860113	0.183676	0.144937	0.38913
#05	0.114249	0.299359	0.194554	0.359878
#06	0.0712963	0.233165	0.086683	0.369152
#07	0.056974	0.1032	0.251237	0.403093
#08	0.0522222	0.071875	0.239178	0.355048
#09	0.0692308	0.115638	0.203755	0.387459
#10	0.025641	0.226389	0.210455	0.375832
#11	0.112987	0.121955	0.0805556	0.444697
#12	0.0716024	0.192593	0.116667	0.321201
#13	0.0878212	0.185216	0.209848	0.461905
#14			0.0553114	0.444048
#15			0.169052	0.429277
#16			0.214066	0.430526
